# Supplementary material for: Transcriptomic Analysis Reveals Host miRNAs Correlated with Immune Gene Dysregulation during Fatal Disease Progression in the Ebola Virus Cynomolgus Macaque Disease Model
Source: Microorganisms. 2021 Mar 23;9(3):665. doi: 10.3390/microorganisms9030665 (PMC8005181; doi:10.3390/microorganisms9030665)
Supplement: Supplementary file 1 [file microorganisms-09-00665-s001.zip]

Archive with 11 entries (11 files):
- microorganisms-1142619-SI.pdf
- Supplemental Table S1-Sample MetaData.xlsx
- Supplemental Table S10 - Kegg pathway analysis of DEMs.xlsx
- Supplemental Table S2- mRNA Normalized Nanostring counts.xlsx
- Supplemental Table S3 - Housekeeping Genes.xlsx
- Supplemental Table S4 - miRNA RAW counts.xlsx
- Supplemental Table S5 - Study design and clinical outcome.xlsx
- Supplemental Table S6 - mRNA expression analysis.xlsx
- Supplemental Table S7 - Binned mRNA expression analysis.xlsx
- Supplemental Table S8 - miRNA Expression analysis.xlsx
- Supplemental Table S9 - Binned miRNA expression analysis.xlsx
