# Supplementary material for: Transcriptomic Analysis Reveals Host miRNAs Correlated with Immune Gene Dysregulation during Fatal Disease Progression in the Ebola Virus Cynomolgus Macaque Disease Model
Source: Microorganisms. 2021 Mar 23;9(3):665. doi: 10.3390/microorganisms9030665 (PMC8005181; doi:10.3390/microorganisms9030665)
Supplement: Supplementary file 1 [file microorganisms-09-00665-s001.zip › Supplemental Table S1-Sample MetaData.xlsx]

## Sheet: Sheet1
ColumnName	NHP ID	Day	Classification_Final	TotalReads	Infected_Viremic	Clinical Score	Bins
ID2_Day1	ID2	Day1	Day1	947423	Incubation	0	Incubation
ID2_Day2	ID2	Day2	Day2	848726	Incubation	0	Incubation
ID2_Day3	ID2	Day3	Day3	921137	Incubation	0	Incubation
ID2_Day4	ID2	Day4	Day4	907700	Viremic	0	Early
ID2_Day5	ID2	Day5	Day5	1424617	Viremic	1	Mid
ID2_Day6	ID2	Day6	Day6	1608347	Viremic	2	Mid
ID2_Day7	ID2	Day7	Day7	1458800	Viremic	3	Late
ID2_DayN14	ID2	DayN14	Day0	957448	Not Infected	0	Not Infected
ID2_DayN7	ID2	DayN7	Day0	3105598	Not Infected	0	Not Infected
ID3_Day1	ID3	Day1	Day1	1021334	Incubation	0	Incubation
ID3_Day2	ID3	Day2	Day2	1331593	Viremic	0	Ealy
ID3_Day3	ID3	Day3	Day3	1404890	Viremic	0	Ealy
ID3_Day4	ID3	Day4	Day4	927777	Viremic	0	Ealy
ID3_Day5	ID3	Day5	Day5	1553261	Viremic	1	Mid
ID3_Day6	ID3	Day6	Day6	1141515	Viremic	4	Late
ID3_DayN14	ID3	DayN14	Day0	1580966	Not Infected	0	Not Infected
ID3_DayN7	ID3	DayN7	Day0	1267264	Not Infected	0	Not Infected
ID4_Day1	ID4	Day1	Day1	1246601	Incubation	0	Incubation
ID4_Day2	ID4	Day2	Day2	966552	Incubation	0	Incubation
ID4_Day3	ID4	Day3	Day3	1031119	Viremic	0	Ealy
ID4_Day4	ID4	Day4	Day4	1071535	Viremic	0	Ealy
ID4_Day5	ID4	Day5	Day5	896275	Viremic	2	Mid
ID4_DayN14	ID4	DayN14	Day0	1167175	Not Infected	0	Not Infected
ID4_DayN7	ID4	DayN7	Day0	10353493	Not Infected	0	Not Infected
ID5_Day1	ID5	Day1	Day1	1443669	Incubation	0	Incubation
ID5_Day2	ID5	Day2	Day2	993787	Incubation	0	Incubation
ID5_Day3	ID5	Day3	Day3	1447143	Viremic	0	Ealy
ID5_Day4	ID5	Day4	Day4	2921530	Viremic	0	Ealy
ID5_Day5	ID5	Day5	Day5	3032568	Viremic	2	Mid
ID5_Day6	ID5	Day6	Day6	1463709	Viremic	2	Mid
ID5_Day7	ID5	Day7	Day7	784349	Viremic	4	Late
ID5_DayN14	ID5	DayN14	Day0	1793371	Not Infected	0	Incubation
ID5_DayN7	ID5	DayN7	Day0	1105090	Not Infected	0	Incubation
ID6_Day1	ID6	Day1	Day1	912722	Incubation	0	Ealy
ID6_Day2	ID6	Day2	Day2	1579840	Incubation	0	Ealy
ID6_Day3	ID6	Day3	Day3	1077395	Viremic	0	Ealy
ID6_Day4	ID6	Day4	Day4	959228	Viremic	0	Ealy
ID6_Day5	ID6	Day5	Day5	1564374	Viremic	0	Ealy
ID6_Day6	ID6	Day6	Day6	1347838	Viremic	1	Mid
ID6_Day7	ID6	Day7	Day7	1298782	Viremic	2	Mid
ID6_Day8	ID6	Day8	Day8	1433667	Viremic	4	Late
ID6_DayN14	ID6	DayN14	Day0	1021381	Not Infected	0	Not Infected
ID6_DayN7	ID6	DayN7	Day0	1206510	Not Infected	0	Not Infected
ID7_Day1	ID7	Day1	Day1	1298904	Incubation	0	Incubation
ID7_Day2	ID7	Day2	Day2	1526168	Incubation	0	Incubation
ID7_Day3	ID7	Day3	Day3	1188010	Viremic	0	Ealy
ID7_Day4	ID7	Day4	Day4	920229	Viremic	0	Ealy
ID7_Day5	ID7	Day5	Day5	1192912	Viremic	1	Mid
ID7_DayN14	ID7	DayN14	Day0	1094765	Not Infected	0	Not Infected
ID7_DayN7	ID7	DayN7	Day0	1161888	Not Infected	0	Not Infected
ID8_Day1	ID8	Day1	Day1	1368474	Incubation	0	Incubation
ID8_Day2	ID8	Day2	Day2	1490359	Incubation	0	Incubation
ID8_Day3	ID8	Day3	Day3	2443210	Viremic	0	Ealy
ID8_Day4	ID8	Day4	Day4	2307488	Viremic	0	Ealy
ID8_Day5	ID8	Day5	Day5	1415448	Viremic	0	Ealy
ID8_Day6	ID8	Day6	Day6	763423	Viremic	2	Mid
ID8_Day7	ID8	Day7	Day7	1111728	Viremic	4	Late
ID8_DayN14	ID8	DayN14	Day0	960190	Not Infected	0	Not Infected
ID8_DayN7	ID8	DayN7	Day0	1050342	Not Infected	0	Not Infected
ID9_Day1	ID9	Day1	Day1	1361222	Incubation	0	Incubation
ID9_Day2	ID9	Day2	Day2	930895	Incubation	0	Incubation
ID9_Day3	ID9	Day3	Day3	744029	Viremic	0	Ealy
ID9_Day4	ID9	Day4	Day4	1051304	Viremic	0	Ealy
ID9_Day5	ID9	Day5	Day5	976582	Viremic	1	Mid
ID9_Day6	ID9	Day6	Day6	1091584	Viremic	4	Late
ID9_DayN14	ID9	DayN14	Day0	1439556	Not Infected	0	Not Infected
ID9_DayN7	ID9	DayN7	Day0	1671327	Not Infected	0	Not Infected
