# Supplementary material for: Transcriptomic Analysis Reveals Host miRNAs Correlated with Immune Gene Dysregulation during Fatal Disease Progression in the Ebola Virus Cynomolgus Macaque Disease Model
Source: Microorganisms. 2021 Mar 23;9(3):665. doi: 10.3390/microorganisms9030665 (PMC8005181; doi:10.3390/microorganisms9030665)
Supplement: Supplementary file 1 [file microorganisms-09-00665-s001.zip › Supplemental Table S2- mRNA Normalized Nanostring counts.xlsx]

## Sheet: mRNA normalized Nanostring data
Label	ID6_Day2	ID7_DayN7	ID5_DayN7	ID9_Day2	ID7_Day3	ID6_Day7	ID2_Day3	ID3_Day1	ID6_Day6	ID6_Day1	ID6_Day8	ID6_DayN7	ID4_DayN7	ID7_Day1	ID9_DayN14	ID5_Day2	ID3_DayN7	ID6_DayN14	ID2_DayN7	ID9_Day3	ID2_DayN14	ID4_Day1	ID8_Day1	ID2_Day2	ID5_Day3	ID8_DayN7	ID2_Day5	ID9_DayN7	ID4_Day4	ID6_Day4	ID3_DayN14	ID5_Day1	ID4_Day3	ID7_DayN14	ID3_Day5	ID6_Day3	ID5_Day5	ID4_DayN14	ID9_Day1	ID7_Day5	ID4_Day2	ID2_Day7	ID7_Day2	ID5_DayN14	ID6_Day5	ID2_Day1	ID5_Day4	ID3_Day3	ID5_Day6
PTGS1	4.91818	5.26623	5.37456	5.11785	5.37707	5.99344	4.66912	5.44819	4.20188	4.6507	5.37781	5.12093	5.3983	5.16668	5.18696	5.09787	5.68564	5.02026	4.98928	4.60707	4.91987	6.03041	5.71411	5.33961	5.51621	6.12748	4.75384	5.09408	6.4449	4.95649	5.61467	5.33843	6.28162	5.37737	7.01862	4.9607	7.43681	5.98013	5.33403	6.36426	5.65485	6.92061	5.40773	5.35357	4.65486	5.19028	5.01333	5.70094	6.35862
C1QBP	6.71773	7.55421	7.8625	7.47726	7.12362	7.3962	6.84013	7.08562	8.12292	6.96569	7.24031	7.25671	8.85773	7.24309	7.58847	6.92384	7.28174	6.98464	7.28268	8.23222	6.959	8.77583	7.90587	6.84657	7.50524	8.04415	6.9634	7.58884	9.72567	7.18055	6.88002	7.49138	9.38665	6.8677	7.49256	7.21093	8.44547	8.42888	7.77983	7.7931	8.02408	7.44972	6.9313	6.79836	7.13524	7.10008	7.23056	6.82024	6.77366
MAFK	4.91818	5.00551	4.76888	4.98876	4.5017	6.57023	4.66912	4.40249	4.20188	4.6507	5.89566	5.12093	4.34692	5.16668	5.18696	4.80274	5.27365	4.93512	4.98928	4.60707	4.91987	4.79429	5.05436	4.40305	4.71152	4.84479	4.75384	4.10234	4.34909	4.95649	4.90087	4.61855	4.67914	4.96171	6.81217	4.80884	6.23169	4.66776	4.69966	5.83374	4.66556	6.59411	4.76693	4.40093	4.65486	5.03353	4.1917	4.67673	6.4741
NFE2L2	8.63463	8.59819	8.40502	8.61812	9.02988	9.22974	8.50823	8.61811	10.1023	8.77408	8.85796	8.34461	8.01183	9.50519	8.58847	8.4458	8.32546	8.66833	8.10418	8.70129	8.38497	8.92022	8.95458	8.55929	8.63673	8.63171	8.80212	8.59465	10.2131	8.79543	8.49919	8.78747	8.8156	8.86157	10.2272	8.56016	9.79986	8.30983	8.43605	9.69357	8.45071	9.84565	9.17261	8.18927	9.1155	8.46329	9.11767	9.00283	10.1767
SOCS1	4.91818	5.00551	4.76888	4.98876	6.75558	8.24008	5.38375	4.41577	7.83341	4.6507	7.77636	5.12093	4.34692	6.76665	5.18696	4.80274	5.27365	4.93512	4.98928	7.07176	4.91987	4.79429	5.05436	4.40305	7.18607	4.84479	7.62051	5.33508	7.87116	6.2212	4.90087	4.61855	7.35487	4.96171	7.83055	4.80884	8.05045	4.66776	4.69966	7.16632	4.66556	7.30333	5.45213	4.40093	7.29818	5.03353	8.22279	7.39755	8.50837
DOCK9	6.81487	5.5404	6.63172	5.72791	4.58566	5.69576	5.65792	7.0438	6.0558	6.84477	6.06813	7.03683	6.88373	5.16668	6.15424	6.73998	7.00084	6.65139	6.4247	5.41726	6.63707	6.60591	6.12915	6.15777	6.66164	6.62129	4.75384	6.06091	6.02986	7.2212	7.17162	6.81842	5.94458	5.79241	6.22721	7.01434	5.81665	6.38538	5.60533	5.60242	5.87724	5.86476	4.76693	6.5412	6.87846	6.41267	6.21497	7.12836	6.35862
TLR6	8.60001	8.65375	8.46409	8.66434	9.68288	8.30062	8.72235	8.24174	11.1473	8.02255	7.70629	7.48663	8.50264	10.0948	8.34312	8.3481	7.86671	8.26262	7.59462	8.77089	8.6213	10.1162	8.6999	9.04005	8.89388	8.48431	10.7018	7.98337	12.2393	8.18878	8.35717	8.74514	10.3584	9.31821	9.81217	8.05073	9.78969	9.19274	8.0981	9.99474	9.83144	8.94775	10.5498	7.49653	10.741	8.32579	10.8898	8.87638	8.85048
STAT4	6.55853	6.55421	6.82436	6.39349	5.40878	5.99344	6.41691	6.8752	5.98541	6.59585	5.77636	6.9081	6.86297	5.73494	6.0657	6.42852	6.9873	6.79199	6.90043	6.46972	6.74286	6.48726	6.54948	6.8861	6.55928	6.60023	6.32185	6.58884	6.14534	6.79543	6.91423	6.44805	6.5793	6.1348	6.25469	6.93867	5.86912	6.92042	6.14847	5.93684	6.18536	5.70429	5.4952	6.60991	6.16627	6.86013	5.6914	6.84296	6.02159
CCL15	4.91818	5.00551	4.76888	4.98876	4.5017	4.50312	4.66912	4.40249	4.20188	4.6507	4.48415	5.12093	4.34692	5.16668	5.18696	4.80274	5.27365	4.93512	4.98928	4.60707	4.91987	4.79429	5.05436	4.40305	4.71152	4.84479	4.75384	4.10234	4.34909	4.95649	4.90087	4.61855	4.67914	4.96171	5.43366	4.80884	6.76221	4.66776	4.69966	4.42073	4.66556	5.97438	4.76693	4.40093	4.65486	5.03353	4.1917	4.67673	3.97551
C1QA	4.91818	5.00551	4.76888	4.98876	4.88522	6.43273	4.66912	4.40249	6.61768	4.6507	5.69974	5.12093	4.34692	5.16668	5.18696	4.80274	5.27365	4.93512	4.98928	4.60707	4.91987	5.16534	5.05436	4.40305	4.71152	4.84479	4.75384	4.10234	6.02986	4.95649	4.90087	4.61855	5.69666	4.96171	7.1992	4.80884	7.63162	4.66776	4.69966	6.53829	4.66556	6.78675	4.76693	4.93853	5.93361	5.03353	5.49876	4.67673	5.77366
C8B	4.91818	5.00551	4.76888	4.98876	4.5017	6.06499	4.66912	4.40249	6.0558	4.6507	5.50335	5.12093	4.34692	5.16668	5.18696	4.80274	5.27365	4.93512	4.98928	4.60707	4.91987	4.79429	5.05436	4.40305	4.71152	4.84479	4.75384	4.10234	4.34909	4.95649	4.90087	4.61855	4.67914	4.96171	7.08136	4.80884	7.45408	4.66776	4.69966	6.20814	4.66556	6.93876	4.76693	4.40093	4.65486	5.03353	4.1917	4.67673	5.68055
TSLP	4.91818	5.00551	4.76888	4.98876	4.5017	4.91815	4.66912	4.40249	4.20188	4.6507	4.48415	5.12093	4.34692	5.16668	5.18696	4.80274	5.27365	4.93512	4.98928	4.60707	4.91987	4.79429	5.05436	4.40305	4.71152	4.84479	4.75384	4.10234	4.34909	4.95649	4.90087	4.61855	4.67914	4.96171	5.05033	4.80884	5.45408	4.66776	4.69966	4.42073	4.66556	5.07626	4.76693	4.40093	4.65486	5.03353	4.93933	4.67673	5.02159
HMGB1	10.1726	10.6189	11.0669	10.3598	10.6934	10.1346	10.7785	10.7845	11.5537	10.4005	9.94214	10.531	10.8656	10.6578	10.4949	10.3956	10.9728	10.2957	10.8052	11.0331	10.5502	10.8903	10.8856	10.5179	10.8991	10.8932	10.8303	10.5742	11.3801	10.3795	10.5039	10.6199	11.304	10.3047	10.3485	10.6124	11.0855	10.5586	10.656	10.7671	10.4722	10.0804	10.3964	9.86488	10.7097	10.7761	10.986	11.1479	10.024
MX1	8.49504	6.26623	7.48461	6.72791	12.7587	13.6872	12.7246	7.62167	15.0608	9.47373	13.1211	8.3517	7.02123	8.88334	6.08385	7.01926	7.5355	7.22495	7.23205	12.6669	7.30333	7.13934	8.86505	9.50107	12.9981	7.38313	14.3865	6.21961	14.4482	12.1052	7.61467	7.26043	13.5398	6.75324	13.9812	11.7417	14.4893	7.05608	6.25741	14.5192	7.63467	13.7361	9.81925	6.8275	13.8664	8.36505	14.1702	13.4625	13.8651
STAT2	8.79119	8.22798	8.93885	8.74029	11.3472	10.8539	11.2096	8.54879	12.4083	9.37209	10.4949	8.56802	8.42687	10.5661	8.56927	8.57704	8.04728	8.4176	8.36133	11.3663	8.54396	8.92403	9.26086	9.51585	11.3483	8.90079	12.2691	8.35574	12.3191	10.9497	8.26738	8.6374	12.187	8.35138	11.1561	10.2098	11.8707	8.61616	8.72397	11.6382	8.91955	10.8918	10.9126	8.39796	11.7306	8.96606	12.1198	11.621	11.1809
IL8	10.564	13.1413	11.3047	11.1402	12.2298	10.3599	10.8108	10.0856	13.2754	9.68111	10.4854	11.5592	12.2687	10.511	9.23765	11.3267	11.1321	11.3838	11.3104	10.1259	8.87173	10.802	9.4532	12.6988	10.0754	11.9062	10.8137	11.7914	12.1419	9.85346	11.1016	9.70705	12.018	12.0369	14.2719	10.7913	12.2694	11.7972	9.14493	11.997	13.271	12.1724	12.7658	10.3258	11.8602	10.5231	9.78416	10.0524	12.575
ILF3	8.30985	8.37912	8.46822	7.90884	7.76786	7.50312	8.22895	8.32266	7.49637	8.33469	7.47297	8.35876	8.19739	8.01128	8.12824	8.35726	8.27618	8.34921	8.23848	7.93849	8.22203	8.35798	7.97242	8.39546	8.32357	8.07501	7.27791	8.32813	7.17282	8.21718	8.28055	8.39884	7.83621	8.22823	7.12668	8.37163	6.81665	8.1194	8.09076	7.41871	7.8858	7.17142	7.74758	8.42205	7.85961	8.10588	7.7358	8.05241	6.98312
DEFA1	6.54241	10.1207	7.34792	9.30455	8.7022	8.12761	7.12741	8.24635	8.66348	6.31775	8.89566	6.00121	6.94427	9.26823	8.33177	6.89897	7.21357	6.34921	7.15262	9.71222	6.74286	7.20347	5.76961	7.43153	7.7847	6.37075	7.62051	9.11038	11.273	6.54952	7.23616	6.94848	8.2589	8.27507	8.06593	6.39204	8.18071	6.89996	9.58718	11.6093	7.26628	10.1924	8.86717	6.43157	7.96923	6.96606	8.09228	8.52244	7.66848
AREG	4.91818	5.00551	4.76888	4.98876	4.5017	5.35873	4.66912	4.40249	6.79277	4.6507	5.3107	5.12093	4.34692	5.16668	5.18696	4.80274	5.27365	4.93512	4.98928	4.60707	4.91987	4.79429	5.05436	4.40305	4.71152	4.84479	4.75384	4.10234	4.34909	4.95649	4.90087	4.61855	4.67914	4.96171	6.22721	4.80884	6.61635	4.66776	4.69966	6.83374	4.66556	5.70429	4.76693	4.40093	5.31212	5.03353	4.1917	4.67673	4.86112
IL22	4.91818	5.00551	4.76888	4.98876	4.5017	5.83872	4.66912	4.40249	4.20188	4.6507	5.61882	5.12093	4.34692	5.16668	5.18696	4.80274	5.27365	4.93512	4.98928	4.60707	4.91987	4.79429	5.05436	4.40305	4.71152	4.84479	4.75384	4.10234	4.34909	4.95649	4.90087	4.61855	4.67914	4.96171	6.95304	4.80884	7.03905	4.66776	4.69966	5.93684	4.66556	6.6392	4.76693	4.40093	4.65486	5.03353	4.1917	4.67673	5.77366
MAP3K1	8.99149	8.50174	8.98279	8.77982	8.46265	8.43723	8.84623	8.30506	9.76152	8.58173	8.51084	9.01019	8.74313	8.34112	8.88345	8.99892	8.51204	8.7234	8.32556	8.42392	8.76456	9.01619	8.45954	8.89581	8.68614	8.74639	9.27791	8.50501	9.17961	8.3587	8.58312	8.92655	9.0717	8.84304	8.23413	9.01434	8.40162	8.93558	8.2376	7.91175	8.60387	8.76658	9.1989	8.82027	9.59182	8.71574	9.38489	8.10975	8.35109
HLA-C	4.91818	9.37912	4.76888	8.52456	10.2228	4.12887	10.8278	8.71122	4.20188	4.6507	4.48415	5.12093	4.34692	10.1227	8.60741	4.80274	8.75922	4.93512	10.3134	8.63391	10.1191	4.79429	8.52953	10.6925	4.71152	8.8347	11.263	8.74839	4.34909	4.95649	8.74078	4.61855	4.67914	9.88139	10.0484	4.80884	4.31028	4.66776	8.27695	10.4882	4.66556	10.6406	10.5613	4.40093	4.65486	10.1655	4.1917	9.4052	3.97551
IL21	7.27613	7.43988	7.14629	6.93601	6.80408	6.13317	6.79037	7.36573	6.83341	7.31775	6.1472	7.51848	6.90419	6.8578	6.95174	6.92384	7.37832	7.46361	7.30734	6.89119	6.93369	6.69783	6.89967	6.85986	7.14424	7.17098	6.58489	7.61192	6.02986	7.34405	7.15264	7.02124	6.28162	7.30698	6.05033	7.65777	6.73419	6.67756	6.47605	6.16632	6.26628	6.26069	6.834	7.64308	7.004	6.81831	6.90086	6.74985	6.50158
ANP32B	8.81989	8.81724	9.02544	8.45113	8.54343	8.73285	8.49664	8.76369	9.09811	8.76786	9.03213	9.06945	8.66733	8.50988	8.80084	8.75392	8.98047	8.81753	8.63901	8.25482	8.42185	8.62477	8.7662	8.7027	8.53252	8.83018	8.02673	8.55351	8.26508	8.50413	8.88865	8.8116	8.30399	8.79241	8.08901	9.03265	7.71998	8.50538	8.52044	8.79996	8.20602	8.13253	8.45758	8.69935	8.43186	8.76793	8.44629	8.47958	7.92341
LCP2	10.1341	10.0506	10.1177	10.1805	10.9425	9.88229	10.3616	9.86773	11.425	9.66557	9.28033	9.6849	9.70281	11.7509	9.87956	10.0924	9.597	9.91537	9.63415	10.6353	10.1552	10.7122	10.1051	10.3455	11.1291	10.2542	11.2412	9.70878	11.7691	10.0858	9.76442	10.2068	11.2319	10.4948	10.1832	10.1463	10.7324	10.1282	9.88544	10.4988	10.5142	9.76658	11.4528	10.0291	11.2663	10.0483	11.5156	10.5995	9.92341
TRAF5	7.03822	6.63438	6.9239	6.29619	6.07504	5.57023	6.06601	6.43207	5.98541	6.66892	5.20379	6.9554	7.03984	6.65248	6.85995	6.46287	6.66877	6.9201	6.4247	6.21696	6.6213	6.80092	6.6564	6.64627	6.11568	6.66252	5.84792	6.442	6.25225	6.58732	6.30655	6.66036	6.31137	6.91579	5.61423	7.34257	5.81665	6.9406	6.30894	4.42073	6.09963	5.47481	5.86717	6.62659	6.07111	6.48573	5.6914	5.65031	5.16598
MAF	6.55853	6.45467	7.0614	6.34566	6.47018	5.46835	6.94617	6.60019	6.66348	6.77201	5.20379	7.12222	6.70864	5.66936	6.40577	6.7259	6.94588	6.37695	6.93249	6.66237	6.45336	6.05842	6.53354	6.80593	6.7756	6.85262	6.72239	7.06091	6.14534	6.89927	6.51414	6.24025	6.25125	5.98506	5.57116	6.88209	6.27122	6.26253	6.49842	4.42073	6.26628	5.26069	5.72966	6.60991	6.69914	6.8738	6.18326	7.14674	6.4741
TGFB3	4.91818	5.00551	4.76888	4.98876	4.5017	4.12887	4.66912	4.40249	4.20188	4.6507	4.48415	5.12093	4.34692	5.16668	5.18696	4.80274	5.27365	4.93512	4.98928	4.60707	4.91987	4.79429	5.05436	4.40305	4.71152	4.84479	4.75384	4.10234	4.34909	4.95649	4.90087	4.61855	4.67914	4.96171	4.12597	4.80884	4.31028	4.66776	4.69966	4.42073	4.66556	5.00915	4.76693	4.40093	4.65486	5.03353	4.1917	4.67673	3.97551
NOTCH1	5.66659	5.45467	5.89965	5.75257	6.03497	7.32997	5.41691	4.81432	7.68585	5.18705	6.6463	5.23387	5.14676	5.91552	5.25377	6.18276	5.27365	5.44407	4.98928	5.66237	5.53977	6.40237	5.59628	5.79212	5.75722	6.26766	5.9634	5.54153	7.76682	5.5367	5.23616	5.81842	6.45154	6.00742	7.79356	5.40816	7.41932	6.16299	5.47605	7.28831	6.55101	7.30333	6.45213	7.16093	6.2841	5.63773	6.57405	4.67673	8.13121
MAP4K4	8.1138	9.23443	8.82114	8.94941	8.92139	8.3348	8.84623	8.56367	10.1513	7.93269	8.2358	8.13049	8.64926	8.9013	8.52014	8.74348	8.4492	8.02026	8.40198	9.1218	8.62921	9.1877	8.63788	8.88284	8.59594	9.02452	9.08739	8.48639	10.4421	7.83787	8.44561	8.57432	9.38665	9.1424	9.48097	8.01959	9.47116	8.67756	8.74751	9.70821	9.05098	9.16758	9.2626	8.41726	8.59467	8.82184	8.94407	8.45029	9.32056
TLR2	9.03822	9.04209	9.5248	8.86992	10.3146	9.5784	9.84165	8.22312	11.5927	8.72353	9.49958	8.44415	8.89399	10.1605	8.40938	9.33657	8.28728	8.8746	8.72848	9.85466	8.77529	9.77794	8.91513	9.32769	10.6203	9.20974	11.019	8.55946	12.0195	9.50248	8.44171	9.61993	11.1875	9.68028	11.4261	9.20402	11.7244	9.32909	8.44759	10.852	10.1992	10.4015	10.7047	8.66746	11.3294	8.48573	11.4899	10.2608	11.0393
AIRE	4.91818	5.00551	4.76888	4.98876	4.5017	6.13317	4.66912	4.40249	4.20188	4.6507	5.47297	5.12093	4.34692	5.16668	5.18696	4.80274	5.27365	4.93512	4.98928	4.60707	4.91987	4.79429	5.05436	4.40305	4.71152	4.84479	4.75384	4.10234	4.34909	4.95649	4.90087	4.61855	4.67914	4.96171	7.28166	4.80884	7.77601	4.66776	4.69966	6.57071	4.66556	6.93876	4.76693	4.40093	4.65486	5.03353	4.1917	4.67673	6.09559
IKZF2	6.51789	6.14375	6.32079	6.13671	5.71811	5.72551	5.91168	6.39928	6.79277	6.58645	5.27594	6.76674	5.88373	6.35162	6.37663	6.30141	6.19011	6.67394	6.25759	5.52035	5.86839	6.05842	6.34547	5.73554	5.89808	6.51277	6.72239	6.38953	6.14534	6.31431	6.45339	6.29996	5.60355	6.37737	5.57116	6.97159	6.91975	6.12823	6.54214	6.69357	6.18536	5.61683	6.13565	5.991	6.39304	6.52092	6.44629	5.5434	5.63164
IL1A	4.91818	5.00551	4.76888	4.98876	4.5017	4.12887	4.66912	4.40249	4.20188	4.6507	4.48415	5.12093	4.34692	5.16668	5.18696	4.80274	5.27365	4.93512	4.98928	4.60707	4.91987	4.79429	5.05436	4.40305	4.71152	4.84479	4.75384	4.10234	4.34909	4.95649	4.90087	4.61855	4.67914	4.96171	5.52677	4.80884	5.70562	4.66776	4.69966	4.42073	4.66556	5.61683	4.76693	4.40093	4.65486	5.03353	4.1917	4.67673	3.97551
EDNRB	4.91818	5.00551	4.76888	4.98876	4.5017	4.96878	4.66912	4.40249	4.20188	4.6507	4.77636	5.12093	4.34692	5.16668	5.18696	4.80274	5.27365	4.93512	4.98928	4.60707	4.91987	4.79429	5.05436	4.40305	4.71152	4.84479	4.75384	4.10234	4.34909	4.95649	4.90087	4.61855	4.67914	4.96171	5.95304	4.80884	6.27122	4.66776	4.69966	6.16632	4.66556	6.04309	4.76693	4.40093	4.65486	5.03353	4.1917	4.67673	5.72786
TBK1	6.99742	7.06878	7.20683	6.92521	7.78609	7.8987	7.66484	6.80183	8.90189	6.63285	7.77013	6.7127	7.02123	7.68603	7.05654	6.86083	6.79853	6.80226	6.81701	7.54501	7.33268	7.60591	7.10778	7.13607	7.85552	6.93903	8.38536	7.24935	8.61482	7.31431	6.85675	7.29017	8.18851	7.26118	8.27496	7.16423	8.62401	7.2301	6.95178	8.60242	7.51835	8.30333	8.11509	6.7228	8.16627	7.06474	8.23056	7.87638	8.17454
HLA-DMB	5.38861	5.56789	5.74493	4.98876	5.24277	4.12887	5.86437	5.00073	4.20188	5.32907	4.48415	5.7878	4.34692	5.66936	5.66881	5.51291	5.27365	5.7071	5.81701	5.74983	5.6681	5.16534	5.39924	6.24143	5.75722	4.84479	4.75384	5.02696	4.34909	5.85863	5.3405	5.3759	5.60355	5.50862	4.12597	5.84704	4.31028	5.77067	4.69966	4.42073	5.39182	3.88692	4.76693	5.60991	4.65486	5.50343	4.1917	5.74985	3.97551
IL12B	4.91818	5.00551	4.76888	4.98876	4.5017	6.30062	4.66912	4.40249	6.12292	4.6507	5.47297	5.12093	4.34692	5.16668	5.18696	4.80274	5.27365	4.93512	4.98928	4.60707	4.91987	4.79429	5.05436	4.40305	4.71152	4.84479	4.75384	4.10234	4.34909	4.95649	4.90087	4.61855	4.67914	4.96171	6.86662	4.80884	6.67648	4.66776	4.69966	6.03305	4.66556	6.59411	4.76693	4.40093	4.65486	5.03353	4.1917	4.67673	6.55502
TAP1	9.69694	9.50885	9.7551	9.98887	11.7054	11.3105	11.1803	9.73933	12.7992	9.55427	11.225	9.34816	9.67628	11.8313	9.50001	9.56325	9.60367	9.65281	9.37014	11.675	9.75917	10.4534	10.3715	10.4371	11.8876	10.1385	12.5239	9.416	13.1156	10.8734	9.58666	9.96702	12.4436	9.92904	11.9293	10.6695	12.687	9.75367	9.38594	12.0287	10.442	11.2498	11.6568	9.37594	12.4037	9.85324	12.5813	11.7256	11.6647
CD40	5.47607	5.23228	5.94774	5.91432	5.58566	5.53706	5.48104	6.26012	4.20188	5.49899	5.34465	5.80856	6.42687	5.66936	6.25377	6.162	6.25938	5.81246	6.00966	5.41726	6.04424	5.94294	5.56525	5.99857	5.51621	6.09773	5.48535	6.18923	4.34909	4.95649	6.60073	5.97315	5.50401	6.21387	5.7747	5.61675	6.61635	6.32526	5.60533	5.83374	5.77033	6.07626	5.26572	6.24973	4.65486	5.97877	5.44629	5.5434	5.41752
HSD11B1	4.91818	5.00551	4.76888	4.98876	4.5017	6.50312	4.66912	4.40249	4.20188	4.6507	5.84912	5.12093	4.34692	5.16668	5.18696	4.80274	5.27365	4.93512	4.98928	4.60707	4.91987	4.79429	5.05436	4.40305	4.71152	4.84479	4.75384	4.10234	6.02986	4.95649	4.90087	4.61855	4.67914	4.96171	6.28166	4.80884	6.67648	4.66776	4.69966	6.28831	4.66556	6.49947	4.76693	4.40093	4.65486	5.03353	4.1917	4.67673	6.32825
IKBKG	5.94932	5.74686	6.18693	5.67728	6.26026	6.01769	6.69895	5.65678	7.47084	5.43759	5.80103	5.61001	5.92437	6.12573	5.64456	6.07585	5.68564	5.79199	6.30734	6.15422	6.34233	6.28872	5.94858	7.10291	5.82937	6.26766	6.94478	6.56538	7.08875	6.12166	5.77221	6.24025	6.3971	6.428	6.6967	5.53102	6.23169	5.85814	6.03064	6.98575	6.57239	6.88362	6.9313	6.62659	6.31212	6.23334	6.66868	6.51538	6.32825
NOS2	4.91818	5.00551	4.76888	4.98876	4.5017	5.75465	4.66912	4.40249	4.20188	4.6507	5.20379	5.12093	4.34692	5.16668	5.18696	4.80274	5.27365	4.93512	4.98928	4.60707	4.91987	4.79429	5.05436	4.40305	4.71152	4.84479	4.75384	4.10234	4.34909	4.95649	4.90087	4.61855	4.67914	4.96171	6.30813	4.80884	6.67648	4.66776	4.69966	4.42073	4.66556	6.28926	4.76693	4.40093	4.65486	5.03353	4.1917	4.67673	5.98312
TNFSF18	4.91818	5.00551	4.76888	4.98876	4.5017	4.12887	4.66912	4.40249	4.20188	4.6507	4.48415	5.12093	4.34692	5.16668	5.18696	4.80274	5.27365	4.93512	4.98928	4.60707	4.91987	4.79429	5.05436	4.40305	4.71152	4.84479	4.75384	4.10234	4.34909	4.95649	4.90087	4.61855	4.67914	4.96171	4.12597	4.80884	4.31028	4.66776	4.69966	4.42073	4.66556	3.88692	4.76693	4.40093	4.65486	5.03353	4.1917	4.67673	3.97551
AGER	4.91818	5.00551	4.76888	4.98876	4.5017	5.1108	4.66912	4.40249	4.20188	4.6507	5.47297	5.12093	4.34692	5.16668	5.18696	4.96037	5.27365	4.93512	4.98928	4.60707	4.91987	4.79429	5.05436	4.40305	4.71152	4.84479	4.75384	5.02696	4.34909	4.95649	4.90087	4.61855	4.67914	4.96171	5.6967	4.80884	6.01596	4.66776	4.69966	4.42073	5.34291	5.20179	5.21509	5.04163	4.65486	5.03353	4.1917	4.67673	6.05906
IRAK1	5.82157	5.51239	5.74493	5.8472	6.15201	7.20883	6.3498	5.68426	7.15534	5.66892	6.84912	5.67928	5.88373	5.73494	5.59481	6.32027	5.9318	5.91064	6.15262	6.36281	6.09079	6.44544	5.94858	6.53462	6.19974	6.34566	6.32185	6.02696	6.19978	6.25291	6.08416	5.79094	6.80518	5.84304	7.81217	6.12576	7.03905	5.81507	5.38294	7.26868	6.50729	6.99187	6.10817	6.24973	6.44457	5.63773	6.04896	6.7256	7.04045
IRAK3	8.03246	8.215	8.9507	7.5494	8.86536	10.0809	7.97985	7.77651	12.0033	8.1137	10.158	7.62179	8.08536	9.01788	7.17977	8.98717	7.79853	7.94348	8.04675	7.74983	8.03237	9.1162	8.0585	8.48828	9.34526	8.40151	10.0487	7.45482	10.892	7.77374	7.68902	9.03302	8.5854	8.68549	11.0717	7.39204	10.6125	8.38538	7.49842	11.4604	9.03182	10.7016	9.81713	8.41726	9.25192	8.16825	9.95585	8.35075	11.2156
TNFRSF18	4.91818	5.00551	4.76888	4.98876	4.5017	4.12887	4.66912	4.40249	4.20188	4.6507	4.48415	5.12093	4.34692	5.16668	5.18696	4.80274	5.27365	4.93512	4.98928	4.60707	4.91987	4.79429	5.05436	4.40305	4.71152	4.84479	4.75384	4.10234	4.34909	4.95649	4.90087	4.61855	4.67914	4.96171	4.7747	4.80884	4.31028	4.66776	4.69966	4.42073	4.66556	3.88692	4.76693	4.40093	4.65486	5.03353	4.1917	4.67673	3.97551
THBS1	9.0511	9.89796	8.76184	8.5876	10.3354	10.1929	9.74702	9.3763	10.0033	9.17456	10.6783	9.13049	9.58417	9.26268	8.23765	9.30141	9.56316	9.10565	8.35543	9.24733	8.83461	9.49497	10.0318	9.57348	9.2856	10.6016	10.4412	8.78439	9.45052	9.21316	10.1127	8.65274	10.1925	9.65925	11.4374	9.4241	8.37465	9.4431	8.09076	11.3053	9.89007	10.39	9.60741	8.56302	9.43823	8.76793	8.74669	11.6219	9.439
ZNF205	4.91818	5.00551	4.76888	4.98876	4.5017	5.94369	4.66912	4.40249	4.20188	4.6507	5.44195	5.12093	4.34692	5.16668	5.18696	4.80274	5.27365	4.93512	4.98928	4.60707	4.91987	4.79429	5.05436	4.40305	4.71152	4.84479	4.75384	4.10234	4.34909	4.95649	4.90087	4.61855	4.67914	4.96171	6.14148	4.80884	6.45408	4.66776	4.69966	5.53829	4.66556	6.07626	4.76693	4.40093	4.65486	5.03353	4.1917	4.67673	6.23309
SPP1	4.91818	5.00551	4.76888	4.98876	4.5017	4.50312	4.66912	4.40249	4.20188	4.6507	4.48415	5.12093	4.34692	5.16668	5.18696	4.80274	5.27365	4.93512	4.98928	4.60707	4.91987	4.79429	5.05436	4.40305	4.71152	4.84479	4.75384	4.10234	4.34909	4.95649	4.90087	4.61855	4.67914	4.96171	4.12597	4.80884	4.31028	4.66776	4.69966	4.42073	4.66556	3.88692	4.76693	4.40093	4.65486	5.03353	4.1917	4.67673	3.97551
FOXP3	4.91818	5.00551	4.76888	4.98876	4.5017	6.17689	4.66912	4.40249	4.20188	4.6507	5.6463	5.12093	4.34692	5.16668	5.18696	4.80274	5.27365	4.93512	4.98928	4.60707	4.91987	4.79429	5.05436	4.40305	4.71152	4.84479	4.75384	4.10234	4.34909	4.95649	4.90087	4.61855	4.67914	4.96171	6.57116	4.80884	5.58533	4.66776	4.69966	6.16632	4.66556	5.86476	4.76693	4.40093	4.65486	5.03353	4.1917	4.67673	5.4741
TNFAIP3	6.84804	7.00989	6.35686	6.34566	7.03497	9.13317	7.2521	7.03315	11.125	6.37346	9.24481	6.9081	6.84191	6.76665	6.43434	6.59264	6.87409	6.71799	6.44706	6.79165	6.43544	7.2528	6.78315	7.15777	6.91476	6.53514	9.27419	6.78439	10.1349	6.84828	6.91423	6.84539	8.18047	6.81795	10.7129	7.20171	11.7905	6.57803	6.1199	11.2056	6.94436	9.49947	6.9927	6.20601	8.16627	6.95324	7.57405	7.14674	10.0637
ICAM4	4.91818	6.28291	6.35686	5.82412	6.07504	7.63436	5.3498	5.24174	7.21807	4.6507	6.78875	5.12093	5.79884	5.41302	5.34688	5.47974	5.27365	4.93512	4.98928	6.52035	4.91987	5.44544	5.87458	4.55111	5.93125	6.79817	5.72239	5.92005	7.35179	4.95649	4.95863	5.61406	6.55464	5.57002	7.6967	4.80884	8.45408	5.77067	6.33403	7.7931	5.65485	6.97438	5.96232	5.79836	5.56587	5.27516	5.6456	4.67673	9.04512
GP1BB	5.50962	6.56789	6.93587	6.29619	7.16134	7.22974	5.51207	5.65678	6.87294	5.94378	5.94075	5.3517	6.79884	6.95734	6.17131	6.91146	5.78294	5.89153	4.98928	6.49526	5.43544	7.33526	6.28961	5.94966	6.96367	6.53514	4.75384	5.9922	7.22626	5.81681	6.3405	6.76293	7.43812	7.01848	7.09663	5.37574	7.21151	7.35564	5.64597	6.69357	7.33041	7.57103	6.81713	6.96501	5.61168	6.07662	5.7358	6.39755	9.55174
MCL1	11.3619	11.3298	11.3288	11.2547	12.4364	11.33	11.8006	10.9669	13.2796	11.1706	11.0637	11.0483	11.0107	12.1537	10.8441	11.3607	10.7321	11.251	10.9404	11.7332	11.0922	11.656	11.3517	11.8461	12.3364	11.7941	12.7995	11.1195	13.3987	11.8128	10.9661	11.4524	12.6073	11.7615	12.7699	11.7551	12.6603	11.3262	10.8456	12.4819	12.1996	12.0757	12.6589	11.0747	12.9854	11.0781	13.0265	12.3508	12.8109
IL9	4.91818	5.00551	4.76888	4.98876	4.5017	4.12887	4.66912	4.40249	4.20188	4.6507	4.48415	5.12093	4.34692	5.16668	5.18696	4.80274	5.27365	4.93512	4.98928	4.60707	4.91987	4.79429	5.05436	4.40305	4.71152	4.84479	4.75384	4.10234	4.34909	4.95649	4.90087	4.61855	4.67914	4.96171	4.12597	4.80884	5.5212	4.66776	4.69966	4.42073	4.66556	3.88692	4.76693	4.40093	4.65486	5.03353	4.1917	4.67673	3.97551
IDO2	5.75318	5.62132	5.37456	5.19185	5.52907	4.63436	4.66912	4.81432	7.49637	4.75533	4.48415	5.12093	4.34692	6.95734	5.18696	5.18276	5.27365	5.7288	4.98928	4.60707	5.53977	4.79429	5.05436	5.37708	5.27917	4.84479	5.80728	4.10234	6.4449	4.95649	4.95863	4.84539	4.67914	5.76641	7.35966	4.9607	7.34717	4.66776	4.69966	7.18738	4.66556	3.88692	6.71152	4.8275	6.67777	5.03353	6.11767	5.5434	6.02159
CXCL6	4.91818	5.00551	4.76888	4.98876	4.5017	4.57023	4.66912	4.40249	4.20188	4.6507	4.56224	5.12093	4.34692	5.16668	5.18696	4.80274	5.27365	4.93512	4.98928	4.60707	4.91987	4.79429	5.05436	4.40305	4.71152	4.84479	4.75384	4.10234	4.34909	4.95649	4.90087	4.61855	4.67914	4.96171	6.88432	4.80884	7.03905	4.66776	4.69966	4.42073	4.66556	5.82628	4.76693	4.40093	4.65486	5.03353	4.1917	4.67673	5.68055
TRAF3	6.59024	6.80575	6.93587	6.70281	6.48513	7.35873	6.7519	6.60019	8.12292	6.58645	7.27594	6.72367	6.36915	6.78225	6.63228	6.68284	7.10487	6.69613	6.91655	6.61656	6.93369	7.07223	6.62665	6.83315	6.37871	6.70259	6.53598	6.93842	7.30288	6.62416	7.15264	6.48282	6.42458	7.08309	8.42159	6.4241	8.38369	7.26253	6.2834	8.47117	6.43912	8.25345	6.61719	6.78356	6.76143	7.05277	6.62214	6.99271	8.55502
CR2	6.04396	5.33182	5.01701	6.26224	5.27754	4.57023	5.38375	5.31389	4.20188	5.45835	4.48415	5.74537	4.34692	5.16668	6.51681	4.91146	5.27365	6.26262	5.78225	5.70676	5.81395	4.79429	6.06406	6.04588	5.22671	6.37075	4.75384	6.442	4.34909	5.25291	5.82112	5.29996	4.67914	6.05114	5.05033	5.69767	4.31028	4.66776	5.90231	4.42073	4.66556	3.88692	5.31463	5.50557	4.65486	6.10008	4.1917	4.67673	3.97551
SHC1	6.3613	6.66014	7.01701	6.70281	7.17062	7.95	7.04495	6.85115	8.23334	6.69539	7.75759	6.43416	6.30903	6.63541	6.65674	7.05348	6.78294	6.40417	6.72848	7.1381	6.58924	6.97269	6.88718	6.58353	7.4605	7.24069	7.26296	6.93842	7.35179	7.00547	6.80905	6.93599	7.32601	6.44449	8.09663	6.71072	8.11705	6.67756	6.93548	8.34564	6.80685	8.10065	7.13565	7.17233	7.31212	6.95324	7.94879	7.45767	8.36612
CCL8	4.91818	5.00551	4.76888	4.98876	4.83941	9.07369	6.04495	4.40249	8.00333	4.6507	7.13755	5.12093	4.34692	5.16668	5.18696	4.80274	5.27365	4.93512	4.98928	5.79165	4.91987	4.79429	5.05436	4.40305	5.3298	4.84479	6.678	4.10234	4.34909	4.95649	4.90087	4.61855	4.67914	4.96171	9.82598	5.00377	6.9925	4.66776	4.69966	7.87327	4.66556	6.49947	4.76693	4.40093	8.70444	5.03353	6.47276	7.26922	6.50158
C6	4.91818	5.00551	4.76888	4.98876	4.5017	4.12887	4.66912	4.40249	4.20188	4.6507	4.48415	5.12093	4.34692	5.16668	5.18696	4.80274	5.27365	4.93512	4.98928	4.60707	4.91987	4.79429	5.05436	4.40305	4.71152	4.84479	4.75384	4.10234	4.34909	4.95649	4.90087	4.61855	4.67914	4.96171	4.8487	4.80884	6.01596	4.66776	4.69966	4.42073	4.66556	3.88692	4.76693	4.40093	4.65486	5.03353	4.1917	4.67673	3.97551
CD80	5.1752	5.69795	6.14629	5.86992	5.97268	5.72551	6.10723	6.14616	7.0558	5.18705	5.44195	5.3517	6.03984	5.16668	6.0657	5.91146	5.78294	5.24767	6.37889	6.24733	6.26325	6.11287	6.48463	6.11405	6.3298	5.68269	6.37844	6.15821	6.35179	5.9388	5.89151	5.79094	6.01858	5.57002	7.43366	5.50127	9.42809	6.32526	5.76145	6.91175	4.66556	6.74611	6.26572	5.70721	6.19664	5.76059	6.77887	6.51538	8.66848
IKZF3	7.71414	7.40982	7.64636	7.47726	6.34465	6.87898	7.40043	8.11115	7.64076	7.63741	6.20379	7.65656	7.63709	7.02445	7.75627	7.46287	7.67723	7.63999	7.79102	7.26228	8.00225	7.62477	7.76961	7.75702	6.96367	7.70259	6.51089	7.9922	6.65435	7.34405	7.97493	7.57432	6.96344	7.428	6.91909	7.60281	7.69112	7.77067	7.86836	6.7793	7.31781	7.17142	6.05159	8.18927	6.98672	7.94678	6.33526	7.25235	6.92341
IL7	5.7946	5.62132	6.24583	5.8472	5.7432	4.75465	6.02357	6.43207	4.20188	6.22388	5.08831	6.32313	6.3983	5.97101	5.82801	6.11957	6.23666	6.18627	6.17958	6.27708	6.0204	6.80092	6.53354	6.74989	6.14424	6.00462	5.76546	5.95657	4.34909	5.48423	6.06398	6.3759	6.08897	5.34261	5.38475	6.58873	6.01596	6.19694	5.99961	4.42073	5.65485	5.74611	5.69314	5.6755	5.85961	6.58883	6.08372	6.09089	5.16598
OASL	6.2366	5.00551	5.30241	5.75257	10.5018	10.2336	10.097	5.08562	11.6422	6.88366	10.1472	5.43416	5.3983	8.31991	5.18696	5.05348	5.27365	5.36315	6.06855	10.2715	5.1579	5.7503	6.6416	7.15777	10.5393	4.84479	11.4495	5.2785	11.3712	9.6586	4.90087	4.61855	11.153	4.98506	10.724	9.00377	11.4901	5.77067	4.69966	10.9827	6.34291	10.5505	8.51102	4.40093	11.2654	6.33571	11.355	10.8791	11.0899
IRF4	7.37502	6.98971	7.17688	7.51378	6.96203	6.08808	6.6854	7.43207	6.24845	6.96569	6.56224	7.24152	6.68518	6.56502	7.28548	7.13029	6.90323	7.2096	6.74662	6.85219	7.21154	7.01619	7.10778	6.69159	7.24	7.17098	5.43289	7.29285	6.08875	7.00547	7.49166	7.0447	6.67394	6.8677	5.6967	7.49374	6.5212	7.27847	7.13426	6.57071	6.39182	6.07626	6.67452	7.44103	6.3396	7.28543	6.59829	6.93042	6.26551
PTGER1	4.91818	5.00551	4.76888	4.98876	4.5017	4.12887	4.66912	4.40249	4.20188	4.6507	4.48415	5.12093	4.34692	5.16668	5.18696	4.80274	5.27365	4.93512	4.98928	4.60707	4.91987	4.79429	5.05436	4.40305	4.71152	4.84479	4.75384	4.10234	4.34909	4.95649	4.90087	4.61855	4.67914	4.96171	4.12597	4.80884	4.31028	4.66776	4.69966	4.42073	4.66556	3.88692	4.76693	4.40093	4.65486	5.03353	4.1917	4.67673	3.97551
C3AR1	6.63653	6.48382	6.66086	6.6901	7.34465	11.1087	6.6854	6.14616	12.1703	6.53852	11.1351	7.22617	6.2463	6.50988	6.20486	6.63844	6.71881	6.67394	6.12514	7.45678	5.72822	6.33526	6.51742	6.2002	7.30471	7.02056	9.91401	6.18923	10.8795	7.52376	6.75972	6.21979	8.08897	6.37737	12.3192	6.9607	11.6383	6.83676	6.1199	11.9947	7.60387	11.9354	7.61719	6.04163	9.85485	6.25441	8.84622	8.3428	12.1595
PIGR	4.91818	5.00551	4.76888	4.98876	4.5017	4.12887	4.66912	4.40249	4.20188	4.6507	4.48415	5.12093	4.34692	5.16668	5.18696	4.80274	5.27365	4.93512	4.98928	4.60707	4.91987	4.79429	5.05436	4.40305	4.71152	4.84479	4.75384	4.10234	4.34909	4.95649	4.90087	4.61855	4.67914	4.96171	4.12597	4.80884	4.31028	4.66776	4.69966	4.42073	4.66556	3.88692	4.76693	4.40093	4.65486	5.03353	4.1917	4.67673	3.97551
CUL9	5.31461	5.39455	5.74493	5.36178	5.49993	5.1108	5.84013	5.62876	4.20188	5.08395	5.47297	5.32313	5.3983	5.63541	5.22135	5.57704	5.65169	5.24767	4.98928	5.41726	5.78593	5.94294	5.39924	5.41361	5.42602	4.84479	4.75384	5.2785	5.96846	5.75171	5.89151	5.79094	5.3971	5.98506	6.22721	5.43987	7.21151	6.26253	5.47605	5.98575	5.52932	6.14039	5.76529	6.04163	5.46966	5.92724	5.6456	5.79716	6.02159
ARG1	4.91818	5.00551	4.76888	4.98876	4.5017	4.12887	4.66912	4.40249	4.20188	4.6507	4.48415	5.12093	4.34692	5.16668	5.18696	4.80274	5.27365	4.93512	4.98928	4.60707	4.91987	4.79429	5.05436	4.40305	4.71152	4.84479	4.75384	4.10234	4.34909	4.95649	4.90087	4.61855	4.67914	4.96171	4.12597	4.80884	4.31028	4.66776	4.69966	4.42073	4.66556	3.88692	4.76693	4.40093	4.65486	5.03353	4.1917	4.67673	3.97551
CASP3	8.70149	8.82865	8.99715	9.13202	9.45887	8.0708	9.49858	8.49161	8.5583	8.44801	8.1327	8.01019	8.77125	9.74294	8.56605	9.08139	8.11112	8.52999	8.97544	8.70129	9.82775	10.2634	10.1876	9.68227	9.31102	10.2859	8.91162	8.63464	10.425	8.63924	8.49166	9.62772	9.58844	9.39657	8.34695	8.2606	8.67648	9.35187	8.80248	8.12325	9.85996	8.91604	9.87126	8.87015	8.32592	9.43359	9.45959	8.47958	8.84512
FAS	7.58631	7.07837	7.9299	7.57036	9.69257	9.61661	8.76805	7.76369	10.8851	7.72138	9.34255	7.67363	7.54886	10.1797	7.78982	7.60807	7.6257	7.45712	7.58457	9.75776	7.82087	7.7503	8.29435	7.87304	10.2334	8.05193	10.5077	7.56538	11.4879	8.78463	7.71513	7.90428	10.0004	6.96234	11.1033	8.50502	12.066	7.8792	7.41856	10.9353	7.50729	10.1345	9.21509	7.21707	10.6201	7.83238	10.8996	9.69471	10.8411
TAP2	5.49294	5.39455	5.40932	6.03985	7.46265	8.02369	6.8523	5.65678	7.52147	5.47881	7.41024	5.12093	4.34692	7.02445	5.6199	5.60807	5.68564	4.94811	5.55398	6.87182	5.39891	5.97269	6.34547	5.94966	7.31731	5.8347	7.53598	5.49262	8.21308	6.70662	5.49919	5.76293	7.45154	5.84304	8.24102	6.02483	8.31915	5.89996	5.47605	7.9615	5.61421	7.78675	7.08016	6.27111	7.36657	5.73084	7.6914	7.5434	8.74521
MAPK14	7.68506	7.82296	7.5716	8.02474	8.53627	8.56201	7.75838	7.16579	10.9443	7.61909	7.83127	7.13049	7.18071	8.60941	7.52347	7.65339	6.95982	7.32092	7.09712	8.22461	7.32296	8.38035	7.60393	7.60738	8.18607	7.43163	9.84542	7.46753	11.2328	7.33667	7.19963	7.89786	8.85148	8.16496	9.12668	7.61675	9.67279	8.05608	7.46473	10.2563	8.45071	8.59982	9.3266	7.18365	9.7791	7.20116	9.66007	7.97224	8.71618
AKT3	9.72131	9.81438	9.75341	9.30664	9.34465	8.66155	8.97429	9.73933	9.66348	9.62484	8.2084	9.81242	9.62789	9.3852	9.65218	9.44365	9.80627	9.87094	9.10418	9.16221	9.18765	9.82559	9.42539	8.85323	9.42892	9.55443	8.43955	9.61192	9.31526	9.68645	9.85528	9.77525	9.52321	9.92463	8.7017	9.97294	8.89466	9.86607	9.52044	8.59456	9.44203	8.16372	9.29343	9.55433	9.47896	9.3007	9.15901	9.63412	8.38099
PSMB9	9.15016	9.16189	9.34792	9.18507	10.895	10.348	10.2895	8.97593	11.8234	9.12997	10.1008	8.77994	9.09874	11.0261	9.12605	9.22591	9.06351	8.98464	9.3818	10.6875	9.39428	9.81946	9.85065	9.77116	11.0828	9.74639	11.5219	9.29285	12.1384	10.3523	8.87713	9.30482	11.2339	9.46685	10.9446	9.64763	11.3724	9.32142	9.152	11.221	9.98676	10.4434	11.1254	9.12028	11.5246	9.38429	11.6608	11.2245	11.1367
C3	4.91818	5.00551	4.76888	4.98876	4.5017	5.66539	4.66912	4.40249	4.20188	4.6507	6.20379	5.12093	4.34692	5.16668	5.18696	4.80274	5.27365	4.93512	4.98928	4.60707	4.91987	4.79429	5.05436	4.73554	4.71152	4.84479	5.80728	4.10234	6.25225	4.95649	4.90087	4.61855	4.67914	4.96171	6.73622	4.80884	6.06177	4.66776	4.69966	6.57071	4.66556	8.80171	4.76693	4.40093	4.65486	5.03353	4.1917	4.67673	7.02159
CXCL12	4.91818	5.00551	4.76888	4.98876	4.69257	5.15519	6.04495	4.40249	6.47084	4.6507	4.72574	5.12093	4.34692	5.16668	5.18696	4.80274	5.27365	4.93512	5.59462	4.60707	5.1579	4.79429	5.05436	5.37708	4.71152	4.84479	4.75384	4.10234	4.34909	4.95649	4.90087	4.61855	4.67914	4.96171	5.43366	4.80884	5.86912	4.66776	4.69966	6.03305	4.66556	5.31727	4.76693	4.40093	4.65486	5.46781	4.1917	4.67673	5.52855
SMAD5	5.11107	5.12537	4.9239	4.98876	4.5017	5.43273	4.76484	4.4799	5.91141	5.651	5.91838	5.23387	5.66133	5.16668	5.18696	5.47974	5.27365	5.4956	4.98928	5.56926	5.6681	5.48726	5.21161	5.04588	4.71152	4.84479	4.75384	5.67904	4.34909	5.25291	5.12368	5.21979	4.67914	4.96171	6.50405	4.91631	6.64673	4.66776	5.2834	4.42073	4.66556	6.28926	5.40773	5.5412	4.65486	5.57215	5.08372	4.67673	5.29722
MAP3K7	5.60584	5.67285	5.99429	5.48463	5.43981	5.06499	5.6854	5.83898	6.18705	5.18705	5.56224	5.58617	5.79884	5.91552	5.78429	5.88637	5.78294	5.77123	4.98928	5.66237	5.9464	5.60591	5.97242	5.61524	5.86414	6.00462	5.678	4.80457	5.90433	5.68354	5.43779	5.64509	5.98206	5.41132	5.95304	5.9607	5.5212	4.66776	5.47605	5.72271	5.77033	5.47481	5.834	5.60991	5.89708	5.97877	5.6914	4.67673	5.41752
C1QB	4.91818	5.00551	4.9239	4.98876	5.52907	6.01769	4.66912	4.40249	4.20188	4.6507	5.89566	5.12093	5.278	5.16668	5.18696	4.80274	5.27365	4.93512	4.98928	4.60707	4.91987	5.48726	5.05436	4.40305	4.71152	4.84479	5.76546	4.88257	6.61482	4.95649	4.90087	4.61855	5.60355	4.96171	6.57116	4.80884	7.30969	5.62865	4.69966	6.40078	5.18536	6.23154	4.76693	4.64308	5.65607	5.03353	6.21497	4.67673	5.77366
ITGAX	5.92466	6.19752	6.61692	6.67728	7.06513	6.48584	6.81546	5.71122	6.61768	5.86823	7.04767	5.76674	5.14676	6.63541	6.22135	5.96037	5.87409	6.12214	6.37889	6.9103	5.9464	4.79429	6.45108	6.2002	7.02641	5.72222	6.74409	6.1265	4.34909	6.47081	5.37366	5.67546	6.15609	6.25184	6.38475	6.16423	7.58533	4.66776	6.40678	6.60242	4.66556	7.17142	6.96232	6.29217	7.18153	6.52092	7.57405	4.67673	7.34352
GFI1	4.91818	5.00551	4.76888	4.98876	4.5017	6.90521	4.66912	5.24174	6.0558	4.6507	5.69974	5.12093	4.34692	5.16668	5.18696	4.96037	5.27365	4.93512	4.98928	4.60707	5.36143	5.16534	5.05436	4.84657	4.71152	4.84479	4.75384	4.10234	4.34909	4.95649	4.90087	5.26043	4.67914	4.96171	7.48097	4.80884	6.34717	4.66776	4.69966	7.16632	4.66556	6.97438	4.76693	4.93853	4.65486	5.03353	4.1917	4.67673	7.90294
C2	4.91818	5.00551	4.76888	4.98876	5.66658	6.60265	5.65792	4.91053	6.30734	4.6507	7.28471	5.12093	4.34692	5.16668	5.18696	4.80274	5.27365	4.93512	4.98928	4.60707	4.91987	4.79429	5.05436	4.84657	4.71152	4.84479	6.58489	4.10234	4.34909	5.18878	4.95863	4.61855	6.28162	4.96171	6.7166	4.80884	6.67648	4.66776	4.69966	6.20814	4.66556	7.17142	5.61719	4.40093	6.49432	5.03353	6.36383	6.82024	6.75094
IL22RA2	4.91818	5.00551	4.76888	4.98876	4.5017	4.81124	4.66912	4.40249	5.91141	4.6507	4.48415	5.12093	4.34692	5.16668	5.18696	4.80274	5.27365	4.93512	4.98928	4.60707	4.91987	4.79429	5.05436	4.40305	4.71152	4.84479	4.75384	4.10234	4.34909	4.95649	4.90087	4.61855	4.67914	4.96171	5.65605	4.80884	6.14923	4.66776	4.69966	4.42073	4.66556	5.82628	4.76693	4.40093	4.65486	5.03353	4.1917	4.67673	3.97551
IL16	8.63653	8.48382	8.56004	8.77982	8.77396	7.02966	8.44934	8.04909	8.21807	8.22085	6.92961	7.9693	8.36177	8.86514	8.63228	8.75045	7.88143	8.55753	8.55912	8.08863	9.06479	9.08249	8.54948	9.18971	8.23337	8.32012	7.9164	8.21207	8.10311	8.06473	8.19036	8.81842	8.51044	9.12205	7.65605	8.30862	7.32855	8.64104	8.57408	7.34564	9.02408	7.68292	9.39642	9.27111	8.02107	8.7346	8.40565	7.90905	6.79603
CXCL10	4.91818	5.00551	5.01701	5.03985	9.84377	12.8415	8.90585	4.40249	11.1126	4.75533	12.8609	5.12093	5.21387	9.46468	5.18696	4.96037	5.27365	4.93512	5.4247	9.20153	5.1579	5.44544	5.59628	6.04588	9.24661	4.84479	9.89232	4.10234	10.9227	9.78869	5.16216	5.29996	11.7135	4.96171	12.555	7.43987	12.9065	4.66776	4.69966	12.8639	5.52932	11.9837	7.3266	4.40093	10.5365	6.21197	10.4176	10.2629	13.3033
CD83	5.76712	5.26623	5.5716	5.51378	5.52907	6.66539	6.29733	5.60019	6.41837	5.73846	6.50335	6.4072	6.14676	5.99798	6.11947	6.03076	5.9873	6.02026	6.15262	5.41726	6.20097	5.81741	5.94858	5.89903	4.71152	5.79817	5.678	5.76393	6.87116	5.9388	6.21801	5.64509	5.69666	5.57002	7.6967	5.89359	7.96866	5.85814	5.90231	6.83374	5.77033	7.51165	5.61719	5.85607	5.82113	6.3747	5.27637	5.97224	7.69252
HAMP	4.91818	5.00551	4.76888	4.98876	4.5017	4.12887	4.66912	4.40249	4.20188	4.6507	4.48415	5.12093	4.34692	5.16668	5.18696	4.80274	5.27365	4.93512	4.98928	4.60707	4.91987	4.79429	5.05436	4.40305	4.71152	4.84479	4.75384	4.10234	4.34909	4.95649	4.90087	4.61855	4.67914	4.96171	4.12597	4.80884	4.31028	4.66776	4.69966	5.93684	4.66556	3.88692	4.76693	4.40093	4.65486	5.03353	4.1917	4.67673	3.97551
RELB	5.08905	5.16189	5.68943	5.29619	5.8625	7.4945	6.08677	5.76369	8.57038	5.23596	7.59081	5.37972	5.3983	6.05045	5.28548	5.7814	5.71881	5.4176	5.74662	5.56926	5.78593	5.91257	5.05436	5.92457	5.96367	5.37075	6.51089	5.58884	8.11732	5.70662	5.55809	5.94848	6.31137	5.91579	8.6353	5.58873	8.41049	5.98013	5.38294	8.62575	5.39182	8.64474	6.18909	5.73823	6.69914	6.05277	6.08372	5.93042	8.48791
CCL3	5.02087	7.43988	7.34792	5.22748	9.63341	9.59663	8.80297	5.27826	10.7509	4.91403	8.18517	6.70165	7.11199	6.37237	5.18696	6.92384	6.25938	6.4956	7.57444	7.50786	5.89487	4.79429	5.21161	7.79904	8.39663	7.22701	10.3	6.49262	9.85429	6.74057	6.74712	4.99739	9.84132	6.62891	13.1502	6.56016	12.2522	7.05608	5.17649	13.0033	8.19917	11.614	8.50049	6.85607	8.02953	5.84632	7.59829	8.69471	11.6933
HLA-A	11.0461	12.5164	9.3185	11.3165	13.7237	11.5511	12.6956	11.87	13.3159	10.9516	11.6145	10.7352	10.7947	13.629	11.1051	8.96337	11.9278	10.9824	12.3861	11.5693	12.2563	11.502	12.2337	12.6441	9.73626	12.3614	13.7321	11.3044	13.0256	11.5193	11.8608	9.19116	12.1187	13.2555	13.7791	11.1802	10.9672	11.0993	11.1954	14.2953	11.8069	13.6936	14.1202	9.08753	12.4847	12.231	10.3135	13.133	11.2665
ICOS	7.1752	7.14375	6.91182	6.48463	6.78004	5.91815	6.41691	6.62876	6.70788	7.37346	6.27594	7.3517	6.21387	6.65248	6.78429	7.162	7.11736	7.4375	6.51216	6.49526	6.55645	6.48726	6.59628	6.51794	6.82937	6.49005	5.9634	7.1265	6.35179	7.18878	6.70865	7.17797	6.25125	6.98506	5.95304	7.40012	6.19105	6.65332	6.64597	5.93684	6.15735	6.14039	6.86717	6.78356	7.10353	6.97877	6.30611	7.07178	5.77366
MAPKAPK5	6.433	6.87339	6.45995	6.45489	6.61314	6.85227	6.73884	7.10608	7.49637	6.70411	6.39412	6.83915	6.18071	7.08858	6.7392	6.35726	7.5355	6.93883	6.72848	6.41726	6.78593	7.00184	6.434	6.66154	6.70064	6.53514	6.37844	6.63464	6.80245	6.62416	7.16216	6.81842	6.60355	7.08309	7.06593	6.8705	7.5212	6.92042	6.47605	6.7793	6.34291	6.66122	7.02244	6.65938	6.85961	7.05277	6.39184	6.7737	7.07744
PSMB10	6.68139	6.3157	7.25541	6.72791	7.72442	8.04744	7.88229	6.88707	8.64076	7.02951	7.62574	6.81883	6.84191	7.92257	6.7277	6.92384	7.10487	6.75017	7.02461	7.49526	6.80001	6.7503	6.87458	6.99857	8.02641	6.85262	8.08739	6.67904	7.46726	7.95335	6.9366	7.17797	8.28162	6.80523	7.79356	7.27386	7.77601	6.29424	6.49842	8.2286	7.12878	7.68292	7.80005	7.50557	8.21901	7.05277	8.34246	8.39755	7.77366
NCF4	7.85458	7.86233	8.26018	7.96268	8.52546	8.59461	7.49664	6.51092	10.4546	7.27743	8.18048	7.05432	6.86297	9.08229	7.28548	8.32027	6.4492	7.47649	6.72848	7.88154	7.34233	7.20347	6.79657	8.00457	8.42602	7.33295	8.95412	7.76393	10.0485	7.38756	7.01226	8.03302	8.24355	8.50469	9.18141	7.35094	9.62401	7.18006	7.32154	9.29802	8.05478	8.72535	9.72515	8.36355	9.21901	7.14588	9.54315	8.06213	9.23719
CD164	9.47395	9.26833	9.84673	9.42067	10.3354	10.7273	10.1947	9.10354	12.1583	9.16354	10.1291	9.2281	9.08536	9.78419	9.08385	9.67919	8.97362	9.32627	9.03203	10.1115	9.41729	9.61065	9.3882	9.79038	10.6126	9.34249	11.4287	8.88731	11.8024	9.69657	9.20885	10.0933	11.1673	9.72146	11.1903	10.1111	11.9398	9.0971	9.09076	11.5114	9.43329	10.8165	10.2827	9.36604	11.0864	9.28543	11.4637	10.5658	11.0145
CD55	8.63843	9.46202	10.2861	10.0082	9.69579	11.0438	9.86136	9.23478	13.0798	8.65774	11.1817	8.99216	9.32809	9.53311	10.1051	9.76429	9.32277	8.89872	9.5095	10.9162	9.62328	9.39964	9.58085	9.76234	10.2466	10.0006	11.605	10.1043	12.9884	8.81946	9.18336	9.79959	10.3602	9.50666	11.0116	9.03525	12.421	9.26253	10.0999	11.8668	9.57504	11.4064	9.86512	9.18365	11.2392	9.61552	11.0826	9.83448	12.0091
TRADD	4.91818	5.64732	6.18693	5.62481	5.61314	5.24008	5.6854	6.02242	7.3914	5.43759	5.56224	6.03683	6.2463	6.56502	5.46236	6.18276	6.16627	6.0721	6.25759	7.1381	5.60536	6.19087	6.30847	6.44923	6.19974	6.46696	6.35042	6.61192	6.99949	5.40177	5.74712	6.02124	6.69666	5.76641	5.43366	6.00377	6.64673	6.92042	6.20397	6.50512	6.12878	6.34475	6.51626	5.3931	6.3396	6.29563	6.18326	6.79716	7.02159
IGF2R	9.79545	9.94456	10.0573	10.512	10.6682	9.51594	9.86887	9.09844	10.772	9.10221	9.3214	8.98762	9.61242	11.1973	9.71029	10.2247	8.94937	9.66552	9.27332	10.4968	10.056	10.672	10.2693	10.7247	10.5934	10.7075	10.9424	9.94526	10.9064	9.03541	9.41208	10.1977	10.7121	10.5096	10.0737	9.33837	10.4368	9.92296	9.80472	9.90222	10.6785	10.4686	11.6868	9.86488	10.8381	9.70239	11.104	10.4687	9.85315
IL23A	4.91818	5.00551	4.76888	4.98876	4.5017	6.53706	4.66912	4.40249	4.20188	4.6507	5.6463	5.12093	4.34692	5.16668	5.18696	4.80274	5.27365	4.93512	4.98928	4.60707	4.91987	4.79429	5.05436	4.40305	4.71152	4.84479	4.75384	4.80457	4.34909	4.95649	4.90087	4.61855	4.67914	5.02945	7.45751	4.80884	7.06177	4.66776	4.69966	6.7793	4.66556	6.92061	4.76693	4.40093	4.65486	5.03353	4.1917	4.67673	6.75094
PTPRC	12.326	12.6096	12.662	12.3457	12.7774	12.2558	12.4788	12.2627	13.9179	12.1643	12.1275	12.1613	12.1733	13.0326	12.248	12.4017	12.3068	12.34	12.3988	12.4454	12.4241	12.7067	12.2985	12.7452	12.769	12.6453	13.3103	12.4528	13.6504	12.2539	12.3186	12.6141	12.7152	12.7646	13.0169	12.3574	12.8631	12.3566	12.186	13.0953	12.5747	12.7802	13.4174	12.1893	13.1197	12.3255	13.3144	12.7214	12.9501
LILRB1	7.48031	6.82865	7.5248	7.57036	7.54343	5.78322	9.34119	8.03315	7.02104	7.33469	5.04767	7.88873	8.18907	6.54687	7.52347	6.89897	8.11112	7.22495	8.76899	8.02869	8.30826	7.7243	8.06959	8.63857	7.40256	7.9474	9.56674	7.34889	7.14534	8.55907	7.73441	7.23005	8.14787	6.3249	6.38475	7.8993	6.55362	7.9406	7.74283	5.53829	7.45071	6.59411	7.31463	7.09054	8.61168	8.9945	8.93458	7.86533	5.16598
CSF1	4.91818	5.00551	5.9239	5.45489	7.22507	6.87898	6.57219	5.12626	7.12292	5.13642	6.41024	5.56192	5.21387	6.98456	5.54328	5.7259	5.27365	5.2173	4.98928	7.30622	5.1579	5.81741	5.87458	5.97432	7.56985	6.03633	7.37844	5.76393	7.11732	6.58732	5.40608	5.17797	7.32601	4.96171	7.22721	6.08623	7.88194	4.66776	5.76145	7.03305	4.66556	6.78675	6.18909	4.8275	7.3396	5.5382	7.6456	7.47232	8.63785
CCL17	4.91818	5.00551	4.76888	4.98876	4.7432	4.12887	4.66912	4.40249	6.0558	4.6507	4.48415	5.12093	4.34692	5.16668	5.18696	4.80274	5.27365	4.93512	4.98928	4.60707	4.91987	4.79429	5.05436	4.40305	4.71152	4.84479	5.58489	4.10234	6.39909	4.95649	4.90087	4.61855	4.67914	4.96171	5.17063	4.80884	5.96866	4.66776	4.69966	4.42073	4.66556	3.88692	4.76693	4.40093	5.74096	5.03353	5.08372	4.67673	3.97551
SELL	12.3577	12.3934	12.53	12.6061	13.6856	13.7064	13.0375	11.8022	16.3134	12.1931	13.2853	11.5955	11.783	13.7546	12.1892	12.4423	11.7209	12.2601	11.8447	13.2954	12.3567	13.0175	12.5235	12.8296	13.8313	12.6385	15.1651	12.2622	16.0709	12.9549	11.9061	12.7899	14.1062	13.0029	14.7453	12.5852	15.0093	12.3137	12.0972	15.1522	13.3196	13.7648	14.1867	11.8125	15.0315	11.9996	14.9223	14.1068	14.3279
HLA-DOB	6.32407	6.55421	6.4264	6.91432	6.26026	6.24008	6.3498	7.00073	7.02104	6.45835	5.77636	6.7127	6.61242	6.73494	7.39854	6.73998	7.25938	6.97559	7.20606	6.33479	7.03237	7.03041	6.434	7.13607	6.51621	6.44351	6.16985	7.40283	7.02986	6.23714	6.94765	6.69042	6.15609	7.25184	6.38475	6.85882	7.47116	6.98013	6.74283	6.91175	6.71374	6.88362	6.69314	7.05401	6.36657	7.32579	6.47276	6.30239	6.38837
CD7	8.7391	8.8201	8.59821	8.30455	8.21614	7.68065	7.73227	8.24174	8.29284	8.99795	7.63948	9.07588	8.95411	8.12573	8.40938	8.517	8.4343	9.04209	8.4415	7.55719	8.23245	8.82559	8.21661	8.10849	8.37871	7.92216	7.41947	8.2567	8.64457	8.97964	8.46882	8.61406	8.04539	8.80842	7.51546	9.22919	7.88194	9.0186	8.70967	7.57071	8.35529	7.18669	8.38501	9.00063	8.33278	8.0224	8.14261	7.71332	7.60655
C1R	4.91818	5.00551	4.76888	4.98876	4.5017	4.63436	4.66912	4.40249	4.20188	4.6507	4.48415	5.12093	4.34692	5.16668	5.18696	4.80274	5.27365	4.93512	4.98928	4.60707	4.91987	4.79429	5.05436	4.40305	4.71152	4.84479	4.75384	4.10234	4.34909	4.95649	4.90087	4.61855	4.67914	4.96171	5.11173	4.80884	4.31028	4.66776	4.69966	4.42073	4.66556	3.88692	4.76693	4.40093	4.65486	5.03353	4.1917	4.67673	5.23309
PLA2G4A	5.2366	5.67285	5.33894	5.65128	5.97268	6.95629	5.76484	5.31389	6.98541	5.11043	6.54774	5.12093	5.14676	6.02445	5.43434	5.54533	5.27365	5.12214	4.98928	6.1218	5.1579	5.78425	5.68554	5.51794	5.79375	5.55716	5.678	5.2785	7.25225	5.61199	5.08416	5.76293	6.25125	5.65748	7.44563	5.37574	7.5212	4.66776	5.52044	7.05614	5.84248	7.44972	6.38501	5.27111	6.2841	5.03353	6.33526	5.97224	7.23309
CD44	10.8972	11.2948	11.4605	11.3309	11.3235	11.6944	10.9902	11.0007	13.5207	10.8423	11.5536	10.9933	10.9964	11.0925	11.1569	11.1782	10.9667	10.7868	10.8687	11.7689	10.7474	11.1295	11.0452	10.8796	11.2192	11.5085	12.4034	11.308	13.8137	10.8657	10.8264	11.1163	11.5224	11.0942	12.4853	11.0507	12.7999	11.0584	11.5088	13.0103	11.2035	12.015	11.4859	10.6015	11.5476	10.9174	11.8058	11.1237	12.5713
BCL2	8.16471	8.64086	8.01136	7.77682	7.59946	7.29071	7.34119	7.84508	7.18705	8.15243	7.11806	8.85919	7.61242	7.59182	7.99074	8.14624	8.19011	8.33866	7.59462	7.55719	7.90792	7.85783	7.81647	7.70639	7.72921	7.84369	6.92593	8.06927	6.93675	7.88416	8.09911	7.8914	7.08897	8.34261	6.30813	8.50127	6.10616	7.77067	7.84237	7.05614	7.02408	6.76658	7.4301	7.45977	7.67777	7.81831	7.06644	6.97224	6.92341
USP9Y	9.07511	9.26623	9.08847	9.00948	9.23837	8.64607	8.76161	9.19713	9.56435	8.9566	8.93797	8.92007	8.88887	9.35162	8.86783	9.03932	9.02425	9.01144	8.6631	9.26228	9.1331	9.24368	9.15543	9.10011	9.0902	9.20626	9.08739	8.71679	9.69756	8.92902	9.12612	9.12393	9.23582	9.32268	8.83055	9.25616	8.76221	8.98984	8.97589	9.33152	9.0202	8.8165	9.33551	8.71112	9.04213	8.92724	9.04013	9.30648	8.80157
CMKLR1	4.91818	5.00551	5.10447	5.03985	5.13315	6.66539	5.24288	4.71122	6.61768	4.72138	6.04767	5.12093	4.34692	5.49102	5.22135	5.41103	5.27365	4.93512	4.98928	6.15422	4.91987	5.48726	5.05436	4.89903	5.96367	5.37075	5.99993	4.10234	6.4449	5.01475	4.90087	4.84539	6.05421	4.96171	6.93616	4.80884	6.84313	4.66776	5.2834	6.88621	5.39182	6.47481	5.21509	5.31293	6.16627	5.03353	7.10079	4.67673	6.05906
GZMB	10.6969	10.286	11.0607	10.797	9.23616	9.31781	11.2284	11.2007	9.19487	10.9895	10.5211	11.1876	11.746	9.271	11.0199	10.1672	11.0603	10.8776	11.9888	10.6511	11.8239	11.2283	11.3306	11.6981	9.87056	10.5869	11.1415	11.1988	9.90842	10.7045	10.5472	11.0699	10.4263	8.66454	9.79121	11.1367	8.36555	11.2434	11.4718	7.70821	10.6026	10.3617	9.29038	10.5146	10.6117	11.4417	9.54938	10.3227	8.69252
KEAP1	4.91818	5.00551	4.87499	4.98876	4.92961	5.60265	5.00188	4.65678	4.20188	4.6507	5.34465	5.12093	4.34692	5.49102	5.18696	4.96037	5.27365	4.93512	4.98928	5.36281	4.91987	4.79429	5.05436	4.79212	4.71152	4.84479	4.75384	4.10234	4.34909	5.01475	5.04351	4.61855	4.67914	5.07252	5.88432	4.80884	6.45408	4.66776	4.69966	6.07886	4.66556	6.10868	4.76693	4.40093	4.65486	5.03353	4.1917	4.67673	5.98312
CD3D	9.37502	9.58143	9.45372	8.96004	9.01192	8.06499	9.1249	9.63582	7.94889	9.59936	7.98447	9.48502	9.32809	8.82805	9.26971	9.00185	9.5813	9.43914	9.41338	8.77089	9.18765	9.28576	9.16839	8.8861	9.05678	9.31367	8.04432	9.38284	8.07425	9.46575	9.30225	9.38512	8.54841	9.42177	7.51546	9.51063	7.29058	9.2342	9.11267	7.18738	8.55639	7.07626	8.57264	9.26046	8.96041	9.3747	8.28386	9.218	7.82894
CYSLTR2	5.15414	5.00551	5.5716	5.39349	5.13315	4.12887	5.31503	5.5413	4.20188	5.35143	4.50335	5.56192	5.3983	5.49102	5.18696	5.26293	6.19011	4.98464	4.98928	5.52035	4.91987	5.97269	6.17097	5.37708	5.37871	4.84479	4.75384	5.67904	6.08875	5.42978	5.49919	5.87186	5.55464	4.96171	5.7747	5.64423	6.48803	5.89996	5.17649	4.42073	4.66556	5.90223	4.76693	5.50557	5.31212	5.60531	5.27637	4.67673	4.86112
LAG3	4.91818	5.00551	4.76888	4.98876	4.5017	5.35873	4.66912	4.40249	4.20188	4.6507	5.08831	5.12093	4.34692	5.16668	5.18696	4.80274	5.27365	4.93512	4.98928	4.60707	4.91987	4.79429	5.05436	4.40305	4.71152	4.84479	4.75384	4.10234	4.34909	4.95649	4.90087	4.61855	4.67914	4.96171	5.6967	4.80884	6.41932	4.66776	4.69966	5.60242	4.66556	5.66122	4.76693	4.40093	4.65486	5.03353	4.1917	4.67673	5.09559
TNFSF13B	9.0165	9.64086	9.13854	9.7107	12.3354	11.3012	11.6566	8.51092	13.1488	9.24793	10.841	8.57106	8.37649	11.1204	9.17555	8.86405	8.40912	8.45387	9.16953	11.7852	9.20362	8.9164	9.86505	9.78517	11.8183	9.37695	13.0128	9.23827	12.9596	11.0586	8.45339	8.7805	12.3849	10.0511	11.9635	10.5264	12.6829	8.28637	9.36479	12.6657	9.06989	11.5955	11.7297	8.35357	12.6067	9.39855	12.8716	12.2016	11.738
CCL2	4.91818	5.00551	4.76888	4.98876	5.71811	9.65576	5.3498	4.40249	9.54	4.6507	8.16156	5.12093	4.34692	5.16668	5.18696	4.80274	5.27365	4.93512	4.98928	4.60707	4.91987	4.79429	5.05436	4.40305	5.55928	4.84479	6.10426	4.10234	6.35179	4.95649	4.90087	4.61855	5.65085	4.96171	10.3879	4.80884	8.9925	4.66776	4.69966	11.2133	4.66556	8.37838	5.4952	4.40093	6.03794	5.03353	6.01333	4.67673	9.76518
SLAMF6	5.89957	5.42493	5.74493	5.70281	4.5017	5.89216	5.76484	6.29619	4.20188	5.77201	5.34465	5.80856	5.66133	5.16668	6.13696	5.57704	5.9873	6.20187	4.98928	5.61656	6.1579	6.00184	6.04169	5.44923	4.71152	5.93903	5.43289	6.1265	4.34909	5.3732	5.77221	6.0905	5.45154	5.11434	6.48097	5.8705	6.58533	5.89996	6.17649	6.03305	4.66556	6.59411	5.36193	5.93853	5.82113	6.05277	5.59829	4.67673	5.35862
FEZ1	4.91818	5.00551	4.76888	4.98876	4.5017	4.12887	4.66912	4.40249	4.20188	4.6507	4.48415	5.12093	4.34692	5.16668	5.18696	4.80274	5.27365	4.93512	4.98928	4.60707	4.91987	4.79429	5.05436	4.40305	4.71152	4.84479	4.75384	4.10234	4.34909	4.95649	4.90087	4.61855	4.67914	4.96171	4.12597	4.80884	4.31028	4.66776	4.69966	4.42073	4.66556	3.88692	4.76693	4.40093	4.65486	5.03353	4.1917	4.67673	3.97551
LAMP3	4.91818	5.00551	4.76888	4.98876	4.5017	4.12887	4.66912	4.40249	4.20188	4.6507	4.48415	5.12093	4.34692	5.16668	5.18696	4.80274	5.27365	4.93512	4.98928	4.60707	4.91987	4.79429	5.05436	4.40305	4.71152	4.84479	4.75384	4.10234	4.34909	4.95649	4.90087	4.61855	4.67914	4.96171	4.12597	4.80884	4.31028	4.66776	4.69966	4.42073	4.66556	3.88692	4.76693	4.40093	4.65486	5.03353	4.1917	4.67673	3.97551
ITGA2B	6.40653	8.32378	7.61692	7.40908	8.72127	7.60265	6.82785	7.24174	7.61768	6.79667	6.50335	6.4072	7.91431	7.98456	6.96159	7.70453	6.71881	6.76074	5.78225	7.92915	7.10219	8.746	8.08061	6.61524	8.17918	8.23387	6.94478	6.82447	8.78475	6.79543	7.68902	7.30967	9.30768	7.87987	7.91909	6.85882	8.37465	8.83137	6.99961	8.12325	8.42744	8.46232	8.23428	7.57596	5.85961	6.99137	7.06644	7.57088	9.00728
PSMD7	7.12737	7.09735	7.40071	7.11785	7.47768	8.11642	7.0343	7.08562	8.12292	7.05017	8.03732	6.9739	7.18071	7.41302	6.92179	7.27265	6.75123	7.04641	7.34356	7.60488	6.97149	7.16534	7.20156	6.92457	7.39068	6.95571	6.9634	7.29285	7.53236	7.24504	6.98032	7.06778	7.28162	7.18473	8.02662	7.22009	8.27122	7.05608	7.30894	8.23873	7.23981	8.23154	7.18909	6.87015	7.56587	6.95324	7.63392	7.26922	8.54845
MME	7.72131	7.47659	8.20683	8.69965	8.53985	4.12887	7.39211	7.36573	4.20188	7.06378	4.48415	6.23387	7.278	8.13183	7.79534	8.40663	6.5813	7.70163	7.06855	8.1381	7.58924	8.80092	8.50521	8.85986	8.62664	8.40151	4.75384	7.67904	7.30288	7.75725	7.52894	9.30482	7.89633	8.08834	4.12597	6.3257	6.38369	7.29424	7.97589	4.42073	8.98875	3.88692	9.16929	7.6015	8.22639	7.05277	7.6456	9.32274	3.97551
MEF2A	6.64411	6.82865	7.0831	6.74029	7.699	7.35873	7.57219	6.91053	9.10643	6.82092	7.35301	6.88873	6.50933	7.13791	6.88086	6.86083	6.85929	6.85253	6.94826	7.65105	7.05602	7.31218	7.01897	7.06896	7.62157	6.70259	8.64378	6.67904	8.64457	6.92902	7.10406	7.07919	8.60355	6.89195	8.05815	7.18309	8.85618	6.85814	6.77983	8.47117	6.96066	8.22416	7.54729	6.16093	8.53054	7.00386	8.4396	7.57088	8.16598
CXCL2	4.91818	5.00551	4.76888	4.98876	4.5017	5.06499	4.66912	4.40249	4.20188	4.6507	4.96278	5.12093	4.34692	5.16668	5.18696	4.80274	5.27365	4.93512	4.98928	4.60707	4.91987	4.79429	5.05436	4.40305	4.71152	5.41966	4.75384	4.10234	4.34909	4.95649	4.90087	4.61855	4.67914	4.96171	6.28166	4.80884	6.73419	4.66776	4.69966	5.66382	4.66556	5.61683	4.76693	4.40093	4.65486	5.03353	4.1917	4.67673	5.58102
IRF3	8.7792	8.52996	8.91182	8.59785	8.57172	8.24522	8.81857	8.86323	8.47084	8.81288	8.76073	8.70164	8.51599	8.58294	8.81177	8.87685	8.87776	8.75017	9.02832	8.89119	8.90792	8.95789	8.81976	9.00756	8.91476	9.02847	8.44618	8.85865	8.29039	8.8612	8.71836	8.84539	8.5854	8.41132	8.15613	9.01959	8.20132	8.67154	8.70967	8.04464	8.45647	8.74095	8.32062	8.91496	8.826	8.89072	8.58015	8.85977	8.19993
SERPING1	4.91818	5.00551	4.76888	4.98876	5.0145	7.99344	4.66912	4.40249	8.70788	4.6507	8.83426	5.12093	4.34692	5.16668	5.18696	4.80274	5.27365	4.93512	4.98928	5.94777	4.91987	4.79429	5.05436	4.40305	4.71152	4.84479	8.66099	4.10234	6.65435	4.95649	4.90087	4.61855	6.01858	4.96171	6.11173	4.80884	8.78286	4.66776	4.69966	7.5218	4.66556	6.59411	4.76693	4.40093	8.02107	5.03353	8.2383	4.67673	7.44609
HLA-DQB1	6.98554	6.3157	7.45995	6.42451	6.55764	5.01769	7.89412	7.39928	4.20188	7.16827	4.50335	7.20284	6.88373	6.65248	6.8172	7.23339	7.38866	7.23256	7.96385	6.30622	7.47983	7.34667	6.72819	7.71373	7.39068	6.74159	5.72239	6.65701	6.57418	7.2685	7.56528	7.19903	7.42458	6.57002	4.91909	7.22919	5.70562	6.79304	5.79798	4.42073	7.03951	6.49947	6.55748	7.84186	5.96923	7.92067	6.54938	6.95148	3.97551
ALOX12	4.91818	5.00551	4.76888	4.98876	4.5017	4.12887	4.66912	4.40249	4.20188	4.6507	4.48415	5.12093	4.34692	5.16668	5.18696	4.80274	5.27365	4.93512	4.98928	4.60707	4.91987	4.79429	5.05436	4.40305	4.71152	4.84479	4.75384	4.10234	4.34909	4.95649	4.90087	4.61855	4.67914	4.96171	4.12597	4.80884	4.31028	4.66776	4.69966	4.42073	4.66556	3.88692	4.76693	4.40093	4.65486	5.03353	4.1917	4.67673	3.97551
EGR1	7.97357	7.81151	7.50886	7.59785	9.72914	6.15519	8.73884	7.41577	7.24845	7.58645	5.41024	8.76939	7.30903	7.72691	6.26971	9.24824	7.31466	8.25142	6.51216	8.45678	5.28343	6.03041	5.92433	8.68414	8.8727	7.79817	7.32185	7.81455	7.17282	8.91174	8.79687	5.79094	9.51044	7.63611	7.6967	10.1197	6.67648	7.7819	5.90231	6.83374	9.36144	6.07626	8.29038	8.44574	9.45717	6.92724	8.77887	8.98251	6.44609
MS4A1	7.8249	7.79997	7.8625	8.11785	7.40092	5.94369	8.49276	8.76047	7.36392	7.53364	5.41024	7.92245	8.19739	7.65248	8.58847	7.91146	8.95286	8.19019	8.49616	7.46972	8.92086	8.31798	8.75593	8.59947	7.50524	8.77955	7.18579	8.24935	6.96846	7.16397	9.13823	7.85869	7.34051	8.24244	6.11173	7.81112	5.70562	8.41453	7.94365	5.93684	7.57239	7.00915	7.55748	7.61827	6.7202	8.95966	6.49876	8.05241	5.86112
LAIR1	7.87403	7.41739	6.26493	7.26224	6.58566	9.18761	7.06601	7.71122	9.86806	7.79259	8.71604	7.89845	7.63709	6.9013	7.1628	6.42852	7.68564	7.94348	7.50151	6.52035	7.53136	7.98003	6.96055	7.71373	5.96367	7.06736	8.07888	6.97449	8.47832	7.27624	7.25408	6.46554	7.0717	7.61441	9.65863	7.97159	6.67648	7.53886	7.19029	7.67877	7.39182	9.73577	6.91553	6.55868	7.67777	7.70812	5.33526	6.93042	6.19993
PTGDR2	4.91818	5.00551	4.76888	4.98876	4.5017	6.63436	4.66912	4.40249	4.20188	4.6507	5.69974	5.12093	4.34692	5.16668	5.18696	4.80274	5.27365	4.93512	4.98928	4.60707	4.91987	4.79429	5.05436	4.40305	4.71152	4.84479	4.75384	4.10234	4.34909	4.95649	4.90087	4.61855	4.67914	4.96171	6.9862	4.80884	6.89466	4.66776	4.69966	6.28831	4.66556	6.44972	4.76693	4.40093	4.65486	5.03353	4.1917	4.67673	7.32825
STAT6	8.39311	7.91678	8.49274	8.49563	8.57172	8.3492	8.57219	8.41986	8.77201	8.34588	8.76387	8.14688	7.85247	8.30918	8.18818	8.64219	8.2928	8.31734	8.34356	8.27708	8.35191	8.45601	8.20659	8.72467	8.54328	8.32655	8.5172	8.2045	8.63472	8.58421	8.53262	8.45245	8.71902	8.48888	8.63006	8.64763	8.38369	8.56509	8.17649	8.67877	8.77494	9.18669	8.88751	8.89445	8.66696	8.35045	8.92981	9.04263	9.21245
CD69	4.97357	5.81724	4.76888	4.98876	5.17062	5.15519	5.27941	5.78923	4.20188	5.35143	5.16631	6.49946	5.21387	5.16668	5.18696	4.80274	6.78294	5.47006	5.88413	4.60707	5.0677	4.79429	5.05436	5.67664	4.71152	4.84479	5.63219	6.02696	5.90433	5.40177	5.40608	5.26043	5.60355	5.44449	5.57116	5.9607	5.45408	4.66776	5.23093	4.42073	4.66556	4.70429	4.76693	5.09054	6.25553	5.39381	4.1917	6.74985	5.16598
IL6	4.91818	5.00551	4.76888	4.98876	4.5017	9.55995	4.66912	4.40249	10.1023	4.6507	8.65648	5.12093	4.34692	5.16668	5.18696	4.80274	5.27365	4.93512	4.98928	4.60707	4.91987	4.79429	5.05436	4.40305	4.71152	4.84479	7.60874	4.10234	6.80245	4.95649	4.90087	4.61855	4.67914	4.96171	9.05033	4.80884	11.4594	4.66776	4.69966	11.1205	4.66556	7.99187	4.76693	4.40093	7.35315	5.03353	4.1917	4.67673	8.97823
ARG2	7.05536	7.43988	7.12553	7.68371	8.36903	8.35873	7.27941	5.9787	10.435	7.10385	8.60138	6.61001	7.11199	8.50519	6.96159	7.42852	5.27365	6.6169	5.85096	8.03741	6.26325	8.25885	7.17097	7.52631	8.13716	7.12748	9.73057	6.82447	10.7187	6.25291	5.69559	7.29996	8.61552	7.57002	9.08901	6.58873	9.42809	7.19694	7.06101	9.44518	8.27283	9.12858	9.03344	6.18365	9.60603	6.23334	9.44963	6.79716	8.85048
MPPED1	4.91818	5.00551	4.76888	4.98876	4.5017	4.12887	4.66912	4.40249	4.20188	4.6507	4.48415	5.12093	4.34692	5.16668	5.18696	4.80274	5.27365	4.93512	4.98928	4.60707	4.91987	4.79429	5.05436	4.40305	4.71152	4.84479	4.75384	4.10234	4.34909	4.95649	4.90087	4.61855	4.67914	4.96171	4.12597	4.80884	4.31028	4.66776	4.69966	4.42073	4.66556	3.88692	4.76693	4.40093	4.65486	5.03353	4.1917	4.67673	3.97551
ZAP70	5.08905	5.00551	5.22646	4.98876	4.88522	4.12887	5.04495	5.31389	4.20188	5.43759	4.48415	5.58617	4.34692	5.16668	5.18696	5.37541	5.27365	5.36315	5.74662	4.60707	5.84143	4.79429	5.05436	5.51794	4.71152	4.84479	4.75384	5.38953	4.34909	4.95649	5.19963	5.0905	4.67914	5.15498	4.12597	4.80884	4.31028	4.66776	4.69966	4.42073	4.66556	3.88692	4.76693	6.5412	4.65486	5.23334	4.1917	4.67673	3.97551
IL19	4.91818	5.00551	4.76888	4.98876	4.5017	4.12887	4.66912	4.40249	4.20188	4.6507	4.48415	5.12093	4.34692	5.16668	5.18696	4.80274	5.27365	4.93512	4.98928	4.60707	4.91987	4.79429	5.05436	4.40305	4.71152	4.84479	4.75384	4.10234	4.34909	4.95649	4.90087	4.61855	4.67914	4.96171	4.12597	4.80884	4.31028	4.66776	4.69966	4.42073	4.66556	3.88692	4.76693	4.40093	4.65486	5.03353	4.1917	4.67673	3.97551
IL12RB2	4.91818	5.04942	5.14629	5.59785	4.52907	4.28072	4.81546	4.4799	4.20188	4.82092	4.67327	5.32313	4.34692	5.16668	5.46236	5.00768	5.27365	4.93512	4.98928	5.9103	5.20097	5.26487	5.68554	5.04588	4.71152	4.84479	4.75384	6.15821	4.34909	5.0869	4.90087	5.44805	4.67914	4.96171	4.12597	5.30862	5.45408	4.66776	6.14847	4.42073	4.66556	5.00915	4.76693	4.76861	4.65486	5.03353	4.1917	4.67673	3.97551
CRP	4.91818	5.00551	4.76888	4.98876	4.5017	4.50312	4.66912	4.40249	4.20188	4.6507	4.48415	5.12093	4.34692	5.16668	5.18696	4.80274	5.27365	4.93512	4.98928	4.60707	4.91987	4.79429	5.05436	4.40305	4.71152	4.84479	4.75384	4.10234	4.34909	4.95649	4.90087	4.61855	4.67914	4.96171	5.8487	4.80884	5.96866	4.66776	4.69966	6.24878	4.66556	5.20179	4.76693	4.40093	4.65486	5.03353	4.1917	4.67673	3.97551
IFNAR2	6.3613	6.33182	6.14629	6.95739	7.88522	7.46835	6.65792	6.41577	7.68585	6.45835	7.08831	6.08867	6.18071	8.29837	6.40577	6.52921	5.27365	5.83263	6.23205	7.62815	6.41729	7.36921	6.25114	6.22096	7.61137	5.90509	7.98178	6.33508	8.32754	6.70662	6.16216	6.11287	7.75194	6.67156	7.88432	6.4709	7.38369	6.26253	6.56351	7.73707	6.96066	8.04309	8.34437	5.991	7.60036	6.21197	8.14261	7.5572	7.8926
FPR2	5.86109	5.00551	4.87499	6.74029	6.79211	9.60065	5.60134	5.12626	10.6859	5.37346	9.80103	5.12093	4.34692	6.19729	6.0657	5.09787	5.27365	5.39063	4.98928	6.66237	5.32296	5.94294	5.46795	5.22096	6.75722	4.84479	8.24024	6.24935	9.48382	6.0869	4.90087	5.61406	7.00044	5.30698	10.3549	4.8705	10.3724	4.66776	6.03064	10.6563	5.97678	9.86238	6.9313	4.40093	7.81135	5.03353	8.00429	7.26922	10.688
MAP4K1	6.80814	6.67285	6.71745	7.05975	6.34465	5.01769	6.62991	7.28725	4.20188	6.79667	5.34465	6.85919	6.42687	6.65248	7.17131	7.05348	6.90323	6.58157	6.96385	6.61656	6.97149	6.95789	6.8361	7.04588	6.58034	7.21321	6.26296	7.04403	4.34909	6.23714	6.99105	6.44805	6.3971	6.3249	5.22721	6.60281	5.64673	6.55203	6.43024	4.42073	6.39182	5.26069	5.89959	7.17233	6.16627	6.92724	6.59829	6.16489	5.52855
BATF3	5.40653	5.23228	5.47644	4.98876	7.29461	9.04154	7.31503	5.20426	10.4546	4.94378	8.54774	5.82902	5.14676	6.843	5.31651	5.51291	5.27365	4.93512	5.63415	6.83229	5.57294	4.79429	6.6416	6.11405	6.86414	6.90509	7.3645	5.33508	7.92063	6.84828	5.23616	5.58236	8.00044	5.41132	9.43666	6.16423	9.3701	4.66776	4.69966	9.93372	5.61421	8.47481	7.13565	5.3931	8.22639	6.02852	8.01333	6.86533	9.59065
KIR3DL2	5.31461	5.04942	5.99429	5.19185	4.5017	6.45065	4.66912	5.16579	6.52147	5.59585	6.1472	5.7878	5.66133	5.66936	5.37663	5.63844	5.27365	5.4956	5.85096	5.36281	5.24279	5.88154	6.01897	5.37708	4.71152	4.84479	6.07032	5.33508	6.19978	5.48423	5.04351	6.21979	5.94458	4.96171	7.46929	6.10613	8.40162	4.66776	5.93548	7.03305	6.03951	7.02622	5.53702	6.04163	5.31212	5.5382	5.39184	4.67673	6.88219
IL10	4.91818	5.00551	4.76888	4.98876	4.5017	5.96878	4.66912	4.40249	6.0558	4.6507	5.04767	5.12093	4.34692	5.16668	5.18696	4.80274	5.27365	4.93512	4.98928	4.60707	4.91987	4.79429	5.05436	4.40305	4.71152	4.84479	4.75384	4.10234	4.34909	4.95649	4.90087	4.61855	4.67914	4.96171	6.35966	4.8705	6.5212	4.66776	4.69966	6.16632	4.66556	6.66122	4.76693	4.40093	5.69914	5.03353	5.15084	4.67673	5.35862
ARHGDIB	11.5472	11.0111	11.5208	10.7685	10.9214	11.3043	11.2231	11.1888	12.2324	11.2044	10.9366	11.282	11.1786	10.855	10.8514	11.3406	11.3455	11.3151	11.4127	10.4089	11.4815	11.5172	11.4893	11.5491	11.0966	11.8554	11.0853	10.8707	11.0411	10.888	11.2407	11.471	11.063	11.1265	10.2615	11.4359	9.54558	11.2322	10.6659	10.7636	11.3241	10.8287	11.0668	11.469	11.2708	11.4757	10.8862	10.9761	10.1574
TIGIT	6.24659	6.34776	6.49274	5.8472	6.24277	5.60265	6.06601	6.26012	6.12292	6.52874	5.41024	6.13871	6.92437	6.10107	6.28548	6.05348	6.90323	5.98464	6.63415	6.24733	6.28343	6.97269	6.25114	6.43153	6.35446	5.90509	5.72239	6.54153	6.08875	6.10438	6.46882	6.43035	6.62739	6.41132	6.52677	6.35925	7.17029	7.07445	6.25741	6.16632	6.59345	6.74611	6.21509	6.33339	6.39304	6.5382	5.59829	6.79716	5.58102
FCER1A	6.82157	7.01987	5.66086	5.72791	5.79211	5.06499	6.10723	5.65678	4.20188	6.22388	5.16631	7.11391	6.11199	5.99798	6.10177	5.54533	6.4293	6.82258	6.53322	5.83229	6.32296	6.24062	5.25114	5.89903	4.71152	4.84479	5.48535	5.9922	6.53236	5.99613	6.14305	5.29996	5.69666	6.62891	6.17063	6.81112	6.96866	5.89996	5.86836	5.53829	5.43912	6.14039	6.4301	5.35357	5.7816	6.29563	4.1917	4.67673	4.94359
CD68	6.44172	5.64732	6.58686	6.09874	6.62669	8.72182	7.06601	6.41577	8.44484	6.45835	8.36959	6.32313	6.30903	6.22037	6.20486	6.20323	6.54478	6.23256	6.90043	6.61656	6.1796	6.13934	6.6564	6.41361	6.62157	6.15662	7.3645	6.36256	6.69282	7.17229	6.14305	6.0905	6.76275	5.23298	8.42764	6.4241	7.82995	6.35564	6.49842	8.16632	6.36757	9.82384	6.53702	6.87015	7.61168	6.99137	7.39184	7.10975	9.39937
PSMB8	8.88046	8.56789	9.32079	8.84147	10.6038	10.4518	10.1535	8.93362	12.0644	9.1186	10.4172	8.73997	9.04446	10.2668	8.74491	8.95435	8.93886	8.7071	8.94826	10.6581	9.01437	9.47951	9.73865	9.33723	11.1265	9.32975	11.3478	9.03125	11.9408	10.4289	8.8151	9.23005	11.2339	8.56626	10.6314	9.75393	11.405	8.98984	8.70005	10.8186	9.44203	10.2112	10.2796	8.76107	11.5681	9.10878	11.829	11.1027	11.3791
KLRF2	4.91818	5.00551	4.76888	4.98876	4.64011	4.57023	4.66912	4.40249	4.20188	4.6507	4.48415	5.12093	4.34692	5.16668	5.18696	4.80274	5.27365	4.93512	4.98928	4.60707	4.91987	4.79429	5.05436	4.40305	4.71152	4.84479	4.75384	4.10234	4.34909	4.95649	4.90087	4.84539	4.67914	4.96171	4.12597	4.80884	4.31028	4.66776	4.69966	4.42073	4.66556	4.52372	4.76693	4.40093	4.65486	5.03353	4.1917	4.67673	5.09559
IL1RL1	6.2955	6.33182	4.76888	4.98876	6.26026	5.53706	5.54244	6.49549	5.91141	6.55789	6.02691	5.74537	4.34692	6.98456	5.18696	4.80274	5.27365	5.59345	4.98928	4.60707	4.91987	6.13934	7.03037	4.73554	4.71152	6.44351	4.75384	4.10234	6.7303	6.71803	6.21801	6.21979	5.82594	6.98506	5.65605	6.14513	6.06177	4.66776	4.69966	6.07886	5.39182	5.47481	7.00765	4.40093	5.61168	5.35534	4.1917	4.67673	3.97551
TIRAP	6.3613	6.33182	6.5716	6.34566	6.40878	6.32025	6.48104	6.16579	7.12292	6.29485	6.45754	5.98306	6.3983	7.08858	6.13696	6.51291	6.01426	6.2173	6.30734	5.74983	6.69847	6.95789	6.434	6.89903	6.40256	6.26766	6.20156	5.9922	6.14534	6.20508	6.27178	6.67546	6.5793	7.02945	6.59286	6.08623	7.06177	6.38538	6.30894	6.57071	6.65485	7.14039	7.00765	6.991	6.3396	6.43128	6.41932	6.5434	6.63164
CCL22	4.91818	5.00551	4.76888	4.98876	4.5017	5.32025	4.66912	4.40249	4.20188	4.6507	4.72574	5.12093	4.34692	5.16668	5.18696	4.80274	5.27365	4.93512	4.98928	4.60707	4.91987	4.79429	5.05436	4.40305	4.71152	4.84479	4.75384	4.10234	4.34909	4.95649	4.90087	4.61855	4.67914	4.96171	5.52677	4.80884	6.5212	4.66776	4.69966	4.42073	4.66556	6.84565	4.76693	4.40093	5.61168	5.03353	4.1917	4.67673	3.97551
XBP1	8.19338	8.09263	7.36574	7.78879	9.23616	8.59058	8.5462	7.61455	10.6089	8.22993	8.55138	7.66227	7.19739	9.25152	7.87044	7.37541	7.04074	8.26633	7.71932	8.54501	7.6681	7.66176	7.60393	8.14153	8.0032	7.41966	9.678	7.90143	9.75778	7.97252	7.04351	7.40339	8.46484	8.53964	7.93616	8.2517	8.05045	7.38538	7.95178	9.40977	7.22639	8.27504	9.41896	6.97806	9.2153	7.9403	8.88123	8.33481	7.54185
MEF2BNB	4.91818	5.00551	4.76888	4.98876	4.5017	6.33962	4.91168	4.40249	5.98541	4.6507	5.96278	5.12093	4.34692	5.16668	5.18696	4.80274	5.27365	4.93512	4.98928	4.60707	4.91987	5.16534	5.05436	4.55111	4.71152	4.84479	5.76546	4.10234	6.02986	4.95649	4.90087	4.61855	4.67914	4.96171	6.50405	4.80884	6.19105	4.66776	4.69966	6.57071	4.66556	6.44972	4.76693	4.40093	4.65486	5.03353	4.1917	4.67673	8.04979
IFNB1	4.91818	5.00551	4.76888	4.98876	4.5017	5.15519	4.66912	4.40249	6.24845	4.6507	4.67327	5.12093	4.34692	5.16668	5.18696	4.80274	5.27365	4.93512	4.98928	4.60707	4.91987	4.79429	5.05436	4.40305	4.71152	4.84479	4.75384	4.10234	6.08875	4.95649	4.90087	4.61855	5.78412	4.96171	5.52677	4.80884	5.76221	4.66776	4.69966	4.42073	4.66556	4.70429	4.76693	4.40093	4.65486	5.03353	5.21497	4.67673	5.58102
RUNX1	7.39311	7.37135	7.34792	7.43978	7.6534	7.51168	7.04495	7.25096	9.1473	7.11697	7.26711	7.17113	7.07637	7.77447	7.12824	7.47133	7.19011	7.27004	7.17958	7.24733	7.28343	7.26487	7.31781	7.56741	7.48305	7.58958	7.90682	7.21961	8.19978	7.11305	7.22711	7.33843	7.0717	7.5473	8.30156	7.03525	7.61635	7.26253	7.03064	7.97367	7.70409	7.60551	8.25948	7.53237	7.54242	7.13457	7.76822	7.47232	8.22487
IL10RA	7.9615	7.63438	8.20683	7.93601	7.96203	7.16608	8.5159	8.00073	8.66348	7.82092	7.44976	8.01913	7.58733	8.01128	8.13261	8.20323	8.02756	8.09316	8.30121	8.43055	8.31318	8.28279	8.08608	8.70639	8.37269	7.93903	8.39224	8.00097	7.81994	8.15561	8.10899	8.29507	8.22022	7.99628	7.59286	8.25616	8.03905	7.66549	7.95178	7.73707	7.78871	7.8165	8.28425	8.29217	8.88314	8.45876	8.58622	8.19169	7.59384
CD86	6.31461	6.06878	6.28379	5.95739	6.36095	5.01769	6.92327	6.46413	6.41837	6.62369	5.3107	6.33749	6.18071	6.63541	6.36183	6.62333	6.82923	6.40417	6.93249	6.49526	6.30333	6.5868	6.62665	6.39546	6.68127	6.49005	6.65528	6.416	6.19978	6.68354	6.45339	6.46554	6.52955	6.11434	5.73622	6.48616	6.34717	6.38538	6.49842	5.66382	6.26628	4.86476	6.67452	6.64308	6.89708	6.19028	7.34962	7.31869	5.98312
IL12RB1	5.1752	5.79416	5.40932	5.19185	6.11404	6.15519	5.84013	5.41577	7.47084	5.21171	6.72574	5.23387	5.9639	6.14998	5.18818	5.51291	5.61693	5.39063	4.98928	5.9103	5.63707	6.13934	5.97242	6.11405	6.37871	5.64205	7.03555	5.33508	7.63472	5.87909	5.52894	6.3759	7.05421	5.8677	7.32119	5.89359	7.77601	5.67756	4.69966	6.57071	6.09963	7.20179	6.4952	5.64308	6.98672	5.76059	6.6456	6.30239	6.35862
C4A	5.08905	5.26623	5.44327	4.98876	5.95131	7.14422	6.02357	4.76369	7.27819	5.02951	6.73856	5.12093	4.34692	5.8578	5.18696	5.4458	5.27365	5.2173	4.98928	5.9843	4.91987	5.97269	5.76961	5.61524	5.64174	5.79817	6.92593	4.10234	7.63472	5.72934	5.30655	5.87186	7.05421	5.57002	7.8755	5.64423	8.27122	5.47111	4.69966	7.48825	5.87724	7.05977	7.06595	5.04163	6.96923	5.81831	6.95819	5.88735	7.58102
B2M	14.774	14.931	15.3498	14.5767	15.8157	15.3334	15.5347	14.5951	17.1828	14.6551	15.2826	14.4305	14.8993	15.6816	14.4464	14.961	14.649	14.6813	15.1232	15.2354	15.0197	15.6077	15.4317	15.4649	15.8016	15.5063	16.5041	14.7027	16.5828	14.9936	14.3881	15.1316	15.9377	15.0973	15.7929	14.766	16.3955	14.8586	14.3294	15.8785	15.4582	15.6398	16.0736	14.6215	16.0592	14.8369	16.2313	15.643	16.0643
APP	7.5705	7.97439	7.83719	7.55643	8.40878	8.83531	8.16205	7.3826	9.40495	7.53852	8.63948	7.53103	7.45488	8.16195	7.22952	7.8479	7.17824	7.53307	7.49078	7.01992	7.6213	8.14588	7.63414	7.79904	8.42019	8.02056	9.02673	6.80457	9.00714	7.87909	7.63533	7.58236	8.20445	8.26118	8.12668	7.79282	8.75525	7.67756	7.25741	8.59456	7.93614	9.16758	8.25948	7.38332	8.57746	7.73084	8.89597	7.74985	8.77366
DDIT3	5.86109	5.45467	5.68943	6.03985	6.27754	6.90521	6.16694	5.57105	8.37773	5.63285	6.94075	5.23387	5.66133	6.56502	6.18818	6.35726	5.5813	5.81246	6.12514	6.05469	6.11351	7.01619	5.94858	6.2002	6.51621	5.9722	7.678	5.72211	8.31526	5.77374	5.58666	6.44805	7.35487	6.30698	8.18498	5.34257	7.89466	6.4431	5.86836	7.94922	6.50729	8.54164	6.81713	5.57596	7.44457	5.60531	7.61027	5.5434	8.57456
APOE	4.91818	5.00551	4.76888	4.98876	4.5017	5.24008	4.66912	4.40249	6.30734	4.6507	4.82527	5.12093	4.34692	5.16668	5.18696	4.80274	5.27365	4.93512	4.98928	4.60707	4.91987	4.79429	5.05436	4.55111	4.71152	4.84479	4.75384	4.10234	6.25225	4.95649	4.90087	4.61855	4.67914	4.96171	6.1992	4.80884	6.10616	4.66776	4.69966	6.72271	4.66556	5.47481	4.76693	4.40093	4.65486	5.03353	4.1917	4.67673	6.50158
PDGFRB	4.91818	5.00551	5.47644	5.11785	4.5017	5.01769	5.48104	5.86323	4.20188	5.23596	4.50335	5.46064	5.3983	5.16668	5.31651	4.80274	5.61693	5.24767	6.37889	5.41726	6.41729	4.79429	5.36362	5.92457	4.71152	4.84479	4.75384	5.8441	4.34909	5.2212	5.55809	5.64509	4.67914	4.96171	5.17063	5.4709	5.5212	4.66776	6.30894	4.42073	5.18536	5.31727	4.76693	4.76861	4.65486	5.70047	4.1917	4.67673	3.97551
IL7R	11.0307	11.0024	10.2885	10.2676	9.88522	8.71813	9.92759	10.5052	9.01221	10.8073	7.63948	10.8826	10.0212	9.83742	10.4787	10.4522	10.3228	11.0963	9.80407	9.2398	9.93209	10.5478	10.0943	9.80076	9.82937	10.4227	9.14967	10.4242	9.64947	10.7648	10.5946	10.6997	9.64794	11.23	8.34055	11.0837	7.86912	10.4519	10.1054	8.42758	9.67968	7.73577	10.2548	10.5781	9.84769	10.3711	9.44295	9.53993	8.50158
MAP4K2	6.55853	6.00989	6.47644	6.62481	6.27754	6.1108	6.44934	6.12626	6.70788	6.7885	5.82527	6.29399	6.11199	6.71882	6.26971	7.14094	6.34684	6.63999	6.44706	6.33479	6.34233	6.97269	6.46795	6.91186	6.68127	6.53514	5.88745	6.49262	7.11732	6.28393	6.37366	7.16732	6.22022	6.58497	6.75559	6.4241	5.45408	6.8792	6.03064	6.07886	7.15735	6.49947	6.47382	7.3232	6.22639	6.78974	6.52429	6.86533	6.75094
TNFRSF13B	4.91818	5.00551	4.76888	4.98876	4.5017	4.50312	4.66912	4.40249	4.20188	4.6507	5.08831	5.12093	4.34692	5.16668	5.18696	4.96037	5.27365	4.93512	4.98928	4.60707	4.91987	4.79429	5.05436	4.40305	4.71152	4.84479	4.75384	4.10234	4.34909	4.95649	4.90087	4.61855	4.67914	4.96171	5.57116	4.80884	6.14923	4.66776	4.69966	4.42073	4.66556	5.57103	4.76693	4.40093	4.65486	5.03353	4.1917	4.67673	4.94359
TRAF2	4.91818	5.00551	4.76888	4.98876	4.5017	6.01769	4.66912	4.40249	4.20188	4.72138	5.53309	5.12093	4.34692	5.16668	5.18696	4.86083	5.27365	4.93512	4.98928	4.60707	4.91987	4.79429	5.05436	4.40305	4.71152	4.84479	4.75384	5.09408	6.02986	4.95649	4.91423	5.17797	4.67914	4.96171	7.30813	4.80884	7.34717	4.66776	4.69966	6.28831	4.66556	6.92061	4.76693	4.991	4.65486	5.03353	5.27637	4.67673	6.38837
SLAMF7	6.13277	6.02979	7.32989	6.95739	5.64011	5.24008	6.93476	7.23246	7.12292	6.28326	5.00585	6.17113	6.48236	6.02445	7.37663	7.07585	6.97362	6.0721	7.06855	7.39029	7.22203	6.83371	7.17097	7.13607	6.58034	6.85262	7.39224	7.2785	8.51099	5.79543	6.68242	7.5983	7.61552	5.65748	7.33413	6.84704	9.88194	6.65332	7.21751	7.03305	5.77033	5.66122	5.80005	7.09054	6.65607	7.11167	7.45959	6.70094	7.07744
POU2F2	5.54241	5.04942	5.89965	5.97845	5.55764	4.96878	6.20541	6.10608	4.20188	5.651	5.00585	5.8691	5.92437	5.41302	5.78429	5.96037	6.30377	5.44407	6.23205	4.60707	5.57294	5.26487	6.19143	5.87304	4.71152	5.87032	6.13743	5.2785	6.7303	5.77374	6.21801	5.67546	4.67914	5.41132	5.9862	5.8232	5.5212	6.2301	5.8336	4.42073	5.80685	5.86476	5.36193	6.33339	5.89708	6.5382	5.93933	5.97224	5.90294
NFKB1	8.57843	8.3596	8.46409	8.23187	8.5647	9.16879	8.14731	8.16579	10.6089	8.11043	8.79183	8.44746	7.9639	8.49102	8.20071	8.54132	8.16627	8.42093	7.51216	8.23222	8.28343	8.41326	8.14498	8.31085	8.34834	8.20626	8.82775	7.79451	9.62977	7.68354	8.36544	8.38971	8.53586	8.78595	9.22026	8.56736	9.66539	8.02806	7.95178	9.99474	8.09226	8.95222	9.05519	7.98455	8.74096	8.3007	8.65719	8.15584	8.80157
TNFRSF14	5.76712	5.83996	6.12553	6.13671	6.40878	6.75465	6.33252	5.91053	7.3914	5.86823	6.50335	5.46064	5.75444	6.70252	5.97137	6.47974	5.27365	5.6169	6.06855	6.18593	5.75736	6.31218	6.08608	6.46672	6.6011	6.06736	5.92593	6.02696	6.48929	6.13873	5.66912	6.1349	5.86658	6.1348	7.26824	5.69767	7.55362	6.0186	5.76145	7.30768	6.12878	7.14039	6.51626	7.04163	6.16627	6.02852	6.6456	6.05241	8.27351
TNFAIP6	7.33346	6.63438	4.76888	8.0745	9.14731	10.1782	7.91168	5.00073	11.9524	6.49899	9.87403	5.80856	5.88373	8.01788	6.98109	5.26293	5.27365	6.54535	4.98928	9.317	5.9464	7.73302	6.08608	7.06896	7.66164	5.51277	10.9212	6.90143	11.6173	7.75725	5.19963	5.3759	9.7218	6.59976	11.6307	7.12576	12.3988	6.0926	6.91899	12.0162	7.18536	10.2875	9.1047	4.40093	10.6778	5.78974	9.61918	8.49401	10.7807
ICOSLG	5.2955	5.00551	4.76888	4.98876	4.58566	4.43273	4.66912	5.12626	4.20188	5.02951	4.48415	5.12093	4.34692	5.16668	5.46236	4.80274	5.27365	4.93512	4.98928	4.60707	4.91987	5.40237	5.05436	4.89903	4.71152	4.84479	4.75384	4.10234	4.34909	4.95649	4.90087	4.61855	4.67914	5.07252	5.33413	5.23824	6.10616	4.66776	4.69966	4.42073	4.66556	5.61683	4.76693	4.40093	4.65486	5.03353	4.1917	4.67673	4.94359
CIITA	6.80814	6.04942	6.98279	7.13671	6.6534	4.50312	7.19589	7.09589	4.20188	6.86823	4.48415	6.75609	6.50933	6.99798	7.30108	7.2433	6.9873	6.9201	6.91655	6.70676	7.36143	6.86578	6.97242	7.3205	7.27917	7.19927	4.75384	7.1265	4.34909	7.1472	7.39805	6.91068	6.78412	6.8677	4.12597	6.71072	4.31028	6.98013	6.60533	4.42073	6.71374	4.93876	6.47382	7.22804	6.25553	7.23334	6.52429	6.86533	3.97551
FCGRT	6.63653	6.04942	6.79837	6.86992	6.189	6.99344	6.06601	6.26012	6.75095	6.37346	6.68657	6.07159	6.00237	6.35162	6.56927	7.15151	6.48819	6.81246	6.40198	6.85219	6.28343	6.81741	6.45108	6.80593	7.01098	7.08262	5.80728	6.15821	6.83721	5.91917	6.38996	6.54993	6.65085	6.68549	7.8029	6.48616	7.38369	6.4431	5.99961	6.43641	7.12878	7.07626	6.61719	7.99743	6.41903	6.31581	6.77887	7.10975	7.51513
RAC1	8.7391	8.31164	8.82436	8.86145	8.73384	8.31047	9.06339	8.38679	9.71333	8.59351	8.5071	8.41737	8.51599	8.88695	8.73346	8.61953	8.28174	8.48608	8.68208	9.17016	9.03535	9.19087	8.83935	9.18971	9.13003	9.0902	9.32905	8.54753	9.67852	8.63021	8.40608	8.54583	9.26651	8.41132	8.45751	8.69438	8.33789	8.84214	8.49842	8.38264	8.87294	9.12066	8.97759	8.41726	9.18533	8.79693	9.2383	8.83731	8.93353
FOXJ1	4.91818	5.00551	4.76888	4.98876	4.5017	4.28072	4.66912	4.40249	4.20188	4.6507	4.48415	5.12093	4.34692	5.16668	5.18696	4.80274	5.27365	4.93512	4.98928	4.60707	4.91987	4.79429	5.05436	4.40305	4.71152	4.84479	4.75384	4.10234	4.34909	4.95649	4.90087	4.61855	4.67914	4.96171	5.95304	4.80884	6.30969	4.66776	4.69966	4.42073	4.66556	4.93876	4.76693	4.40093	4.65486	5.03353	4.1917	4.67673	4.94359
F13A1	8.01796	8.94587	8.59444	8.29199	8.98325	9.21409	7.74538	7.96196	10.3181	8.06039	8.55501	7.75074	7.18071	8.65672	8.00985	8.90835	7.90323	8.11392	6.81701	8.50786	7.1579	7.91257	7.6999	7.13607	9.11206	7.8615	8.28533	8.06927	8.66407	7.95335	7.88002	8.41243	8.31137	8.87075	8.45751	8.13548	8.09519	7.4431	7.93548	9.88299	7.42744	9.00915	8.85895	7.98455	8.98237	7.30575	8.99061	8.16489	9.04512
BTK	6.11107	6.16189	6.14629	6.37772	6.97268	6.64996	6.76484	6.39928	8.18705	6.22388	6.36133	5.80856	6.14676	6.39284	6.30108	6.41103	6.5073	6.1705	6.46909	6.46972	6.36143	6.48726	6.71411	6.74989	6.35446	6.85262	7.26296	6.33508	7.14534	6.23714	6.48409	5.79094	6.69666	5.76641	6.54914	5.67119	6.64673	6.47111	6.06101	7.05614	6.73285	7.28926	7.13565	6.09054	6.95153	6.55527	7.51158	6.7256	7.04045
IL17A	4.91818	5.00551	4.76888	4.98876	4.5017	4.12887	4.66912	4.40249	4.20188	4.6507	4.48415	5.12093	4.34692	5.16668	5.18696	4.80274	5.27365	4.93512	4.98928	4.60707	4.91987	4.79429	5.05436	4.40305	4.71152	4.84479	4.75384	4.10234	4.34909	4.95649	4.90087	4.61855	4.67914	4.96171	4.91909	4.80884	4.31028	4.66776	4.69966	4.42073	4.66556	3.88692	4.76693	4.40093	4.65486	5.03353	4.1917	4.67673	3.97551
BLK	4.99742	5.00989	4.9239	5.42451	4.7432	4.75465	4.91168	5.93362	4.20188	5.18705	4.96278	5.4072	5.3983	5.16668	6.13696	5.05348	6.28174	5.4176	5.7101	4.60707	5.1579	5.44544	5.32709	5.55111	4.71152	4.84479	4.75384	6.02696	4.34909	5.0869	6.66912	4.94848	4.67914	5.47691	5.11173	5.00377	4.31028	5.89996	5.47605	4.42073	5.34291	5.07626	5.4952	5.60991	4.65486	6.31581	4.1917	6.09089	3.97551
CD59	8.28585	8.72566	8.77189	8.13202	9.27754	10.8715	8.1863	7.46413	13.0304	8.15879	10.7014	7.91768	8.44793	10.0424	7.7506	8.52921	7.25938	8.30295	8.2256	9.08022	8.03832	8.79261	8.87774	8.43153	9.59852	9.35197	10.7865	8.2045	12.1244	8.2252	7.36544	8.69413	9.54215	8.91283	10.6431	8.28263	11.4487	8.49177	8.1199	11.9584	9.11428	10.8906	10.0606	8.24434	10.0975	8.06474	10.4005	8.74383	10.8303
HLA-DQA1	8.98554	8.72871	9.85779	8.54588	8.57871	6.63436	9.13739	10.2452	7.36392	8.79055	6.5183	9.22424	8.91935	8.59182	9.21313	9.48184	10.3038	9.47167	9.30121	8.44373	9.40353	9.04098	9.31081	9.34671	9.31417	9.25424	6.90682	8.93842	6.93675	8.72087	10.2838	9.50624	8.54215	9.06454	7.8029	9.16186	7.43681	8.57803	8.53133	6.72271	8.15026	7.71486	8.58266	9.89445	7.54242	9.41968	8.6744	9.47232	7.04045
CAMP	9.09458	9.20191	9.40287	9.7873	10.1706	10.2907	8.89706	9.13126	12.0199	8.55548	9.75759	7.98306	9.42687	9.93832	9.2417	9.40883	8.56316	8.67952	8.43032	9.72306	8.96526	10.4468	9.01323	9.68227	9.66164	9.09773	10.1976	9.35574	13.0383	8.81946	8.58312	9.63353	10.8464	9.61623	11.2623	8.15471	10.2954	9.56833	9.25741	11.644	10.8381	11.1666	10.9086	8.8057	10.2079	8.59709	10.4413	10.503	11.2114
ATG5	6.98554	7.17981	7.51685	6.80066	7.36903	7.43273	7.38375	7.29619	8.27819	7.00149	7.41024	7.07159	7.19739	7.18561	6.93184	7.15151	7.49778	6.97559	7.39048	6.9103	7.31318	7.46651	7.33631	7.25155	7.50524	7.28095	7.54836	6.78439	7.96846	7.3218	7.33208	7.40339	7.23582	7.25184	7.42159	7.41615	7.50471	7.27847	6.77983	7.58665	6.94436	7.74611	7.46302	7.13784	7.53054	7.36505	7.59829	7.5434	7.85048
NOX1	4.91818	5.00551	4.76888	4.98876	4.5017	4.12887	4.66912	4.65678	4.20188	4.6507	4.48415	5.12093	4.34692	5.16668	5.18696	4.80274	5.27365	4.93512	4.98928	4.60707	4.91987	4.79429	5.05436	4.40305	4.71152	4.84479	4.75384	4.10234	4.34909	4.95649	5.00169	4.61855	4.67914	4.96171	4.8487	4.80884	4.31028	4.66776	4.69966	4.42073	4.66556	4.52372	4.76693	4.40093	4.65486	5.03353	4.1917	4.67673	3.97551
FKBP5	9.06668	7.99478	7.66086	8.05975	8.3323	10.2167	8.47712	8.26467	11.6775	8.94929	10.7362	8.61001	7.69696	8.75484	7.79534	7.63844	7.79853	8.74752	7.64386	8.33479	7.81395	8.25885	8.17611	7.67664	8.37871	7.75117	10.5545	7.38953	11.2131	9.07142	7.99105	8.23516	8.76275	8.60711	10.3644	9.01434	9.96565	7.59085	7.95986	10.7897	7.70409	10.2279	9.31463	7.6015	10.3815	8.49903	9.54315	8.75585	10.2555
SRC	4.91818	5.00551	4.9712	5.54235	5.52907	7.02966	4.86437	5.12626	6.57038	4.6507	6.59081	5.12093	4.34692	5.16668	5.28548	5.41103	5.27365	4.93512	4.98928	6.30622	5.11351	5.35798	5.68554	5.30113	5.82937	5.64205	6.37844	5.09408	6.76682	4.95649	5.49919	5.1349	5.82594	5.07252	7.29496	5.12576	7.78969	4.66776	5.43024	6.91175	5.29228	7.47481	4.76693	5.18365	5.46966	5.03353	6.21497	6.05241	7.92341
DEFB4A	4.91818	5.00551	4.76888	4.98876	4.5017	7.52019	4.66912	4.40249	5.98541	4.6507	7.19451	5.12093	4.34692	5.16668	5.18696	4.80274	5.27365	4.93512	4.98928	4.60707	4.91987	4.79429	5.05436	4.40305	4.71152	4.84479	4.75384	4.10234	5.96846	4.95649	4.90087	4.61855	4.67914	4.96171	7.56019	4.80884	9.51298	4.66776	4.69966	7.34564	4.66556	8.02622	4.76693	4.40093	4.65486	5.03353	4.1917	4.67673	7.46016
NLRP3	6.2366	5.19752	5.22646	6.32936	6.75558	6.37759	6.22427	5.08562	8.18705	6.00149	5.87258	6.12222	5.45488	7.17383	5.64456	6.2823	5.54478	6.08897	4.98928	7.15422	5.47106	5.7503	5.82305	6.2616	6.6011	5.79817	6.99993	5.63464	8.14534	6.67186	5.16216	5.54993	6.80518	6.02945	7.46929	6.43987	8.08413	5.67756	5.86836	7.57071	6.48492	7.15599	7.58764	5.50557	7.18153	5.63773	7.24599	6.65031	6.83975
CD70	4.91818	5.00551	4.76888	4.98876	4.5017	7.09948	4.66912	4.40249	4.20188	4.6507	6.24031	5.12093	4.34692	5.16668	5.18696	4.80274	5.27365	4.93512	4.98928	4.60707	4.91987	4.79429	5.05436	4.40305	4.71152	4.84479	4.75384	4.10234	4.34909	4.95649	4.90087	4.61855	4.67914	4.96171	6.7747	4.80884	6.34717	4.66776	4.69966	6.12325	4.66556	6.49947	4.76693	4.40093	4.65486	5.03353	4.1917	4.67673	8.76235
OAS3	6.13277	6.08789	5.74493	5.07938	11.019	10.0981	10.5481	5.08562	12.045	7.13642	9.62574	5.94606	5.75444	7.843	5.25377	5.75392	5.27365	6.13844	6.03941	9.39029	5.6681	6.31218	7.09697	7.06896	10.009	6.34566	11.6927	4.10234	12.0587	9.50742	4.95863	6.0447	11.3387	6.19451	11.0435	9.34047	11.8041	6.32526	5.72397	11.6344	6.67475	10.5416	8.52148	5.991	11.1691	6.80409	11.4337	10.2223	10.673
SIGLEC1	4.91818	5.00551	4.76888	4.98876	5.47018	7.59461	5.81546	4.40249	8.97637	4.6507	6.95181	5.12093	4.34692	5.16668	5.18696	4.80274	5.27365	4.93512	4.98928	5.66237	4.91987	4.79429	5.05436	4.40305	5.37871	4.84479	7.48535	4.10234	7.14534	5.99613	4.90087	4.61855	6.67394	4.96171	8.14882	5.27386	8.61635	4.66776	4.69966	8.39174	4.66556	7.53569	4.76693	4.40093	7.7202	5.03353	7.83095	5.5434	8.12239
CEACAM3	4.91818	5.00551	4.76888	4.98876	4.88522	7.08808	4.66912	4.4799	7.3914	4.6507	5.6463	5.12093	4.34692	5.16668	5.18696	4.80274	5.27365	4.93512	4.98928	4.60707	4.91987	5.31218	5.21161	4.40305	4.71152	4.84479	4.75384	4.10234	6.14534	4.95649	4.90087	4.61855	4.67914	4.96171	7.28166	4.80884	4.31028	4.66776	4.69966	7.43641	4.66556	6.31727	5.76529	4.40093	6.03794	5.03353	4.1917	4.67673	6.41752
PTPN22	7.72846	7.75883	8.21668	8.03985	6.66658	7.13317	7.75838	8.24635	8.00333	7.51394	7.16631	8.13049	8.30134	7.50048	7.98592	7.81503	8.32007	8.05503	8.05405	7.43055	7.84143	8.28279	8.35457	8.39546	7.18607	8.18519	7.12094	7.86346	7.98406	7.0869	8.18569	8.15659	7.38316	7.45266	7.21327	7.8993	6.55362	8.22188	8.15553	7.07886	7.58296	7.38501	7.33847	7.51456	6.91546	8.13457	6.95819	7.35075	7.02159
IL1R1	7.50962	8.05428	7.79179	7.93062	8.11404	10.1304	6.86437	6.22312	11.0579	7.01557	11.1893	7.01019	6.98326	8.71882	7.17131	7.76084	5.95982	7.5082	6.23205	7.08863	7.0204	7.91257	7.42539	7.484	7.67149	7.87032	8.81755	7.30707	10.1762	6.0869	6.32362	7.777	7.42458	8.51253	9.55468	6.48616	9.28577	7.35564	7.43024	9.66757	7.97678	10.4193	9.13225	7.02914	8.61168	6.71574	8.51158	6.57088	9.94108
IL1R2	8.80814	8.63438	9.56583	8.8472	7.72442	12.536	8.22895	7.98424	13.3583	8.27451	13.1107	8.51848	9.03984	8.13791	7.98109	9.856	7.8368	8.71256	8.72848	7.27708	8.50582	9.90873	8.82305	10.0357	9.04925	9.44646	8.84291	8.95657	11.2114	7.66598	8.22257	10.1059	8.72456	8.80523	11.9446	7.71072	10.3927	9.12823	8.48727	12.9411	10.3918	12.7833	9.06237	9.26313	8.7358	8.3795	9.18326	8.67585	12.1681
CYBB	9.46007	9.18648	9.58306	9.33753	10.5416	12.1352	10.3942	9.52049	12.3639	9.38028	12.2596	9.33927	9.01654	10.9357	9.41117	9.41103	9.554	9.11804	9.88002	10.2826	9.57499	9.34667	9.32709	9.83483	10.4216	9.19225	11.1618	9.442	11.0071	10.6922	9.44171	9.31932	10.611	9.20422	12.1216	9.92893	10.7743	9.08356	9.13783	12.3362	9.45071	12.5553	10.511	9.33339	11.4774	9.59709	11.3235	10.9064	12.3833
CCL18	4.91818	5.00551	4.76888	4.98876	4.5017	4.28072	4.66912	4.40249	4.20188	4.6507	5.20379	5.12093	4.34692	5.16668	5.18696	4.80274	5.27365	4.93512	4.98928	4.60707	4.91987	4.79429	5.05436	4.40305	4.71152	4.84479	4.75384	4.10234	4.34909	4.95649	4.90087	4.61855	4.67914	4.96171	4.12597	4.80884	4.31028	4.66776	4.69966	5.53829	4.66556	5.20179	4.76693	4.40093	4.65486	5.03353	4.1917	4.67673	3.97551
NFKB2	4.91818	5.08789	5.44327	5.26224	5.47018	6.50312	6.06601	5.24174	7.85331	4.7885	6.72574	5.51217	5.14676	5.16668	5.22135	5.47974	5.27365	4.93512	4.98928	5.36281	4.91987	5.35798	5.12915	5.33961	5.47182	5.68269	6.03555	5.09408	7.55342	5.18878	5.16216	5.44805	5.69666	5.37737	7.89309	5.30862	8.1598	4.66776	5.47605	8.21841	5.69438	7.47481	5.76529	5.88408	4.65486	5.03353	5.49876	4.67673	7.40302
CD244	5.2565	5.79416	5.68943	6.70281	4.5017	4.75465	5.3498	5.16579	6.0558	5.41653	4.56224	5.8691	6.61242	5.63541	7.08385	5.37541	5.65169	5.54535	6.49078	6.59311	6.69847	6.5868	6.19143	6.63084	4.71152	5.79817	4.75384	7.04403	4.34909	4.95649	4.91423	6.17797	5.86658	5.30698	5.28166	5.50127	5.91975	6.4431	7.27046	4.42073	6.29228	4.70429	4.76693	5.3931	4.65486	6.14588	4.1917	4.67673	5.35862
CD14	8.4547	8.59151	8.78188	8.74644	8.52907	9.11642	8.50823	7.1755	10.3394	8.19015	10.0921	7.8691	8.03057	8.28748	8.33557	9.20323	7.15419	8.30656	8.78225	7.70676	8.84483	9.17816	8.3726	9.53462	8.73861	8.61606	8.13743	8.629	9.64457	7.61809	7.47647	9.12668	8.13129	8.72652	10.9872	7.4632	10.0952	8.47803	8.1271	9.82032	9.62958	10.9149	9.64614	9.34604	7.9063	8.57633	8.2071	7.79716	11.3483
KCNJ2	8.82157	8.72566	8.15143	9.26867	10.5109	9.65383	9.18389	7.64284	11.5628	8.6555	9.01378	7.22617	7.45488	11.0553	8.74206	7.80837	6.48819	8.30295	6.81701	10.2548	7.95271	9.48469	8.89344	8.15777	10.0568	8.26766	11.1996	8.32114	12.0252	8.87145	7.1334	8.65656	10.8117	9.88139	10.2027	8.73649	11.4476	8.67154	8.8336	10.8958	9.19917	9.12462	11.2279	7.70721	11.4093	7.63773	11.5203	9.33881	9.43187
DUSP4	5.33346	5.81724	5.87499	4.98876	5.17062	5.01769	5.00188	5.60019	4.20188	5.18705	4.56224	5.7878	5.278	5.16668	5.18696	5.86083	6.30377	5.18627	5.4247	4.60707	4.91987	4.79429	5.05436	5.33961	5.42602	5.41966	4.75384	4.10234	4.34909	5.2212	6.08416	5.26043	5.50401	5.68549	4.12597	5.67119	5.86912	4.66776	4.69966	4.42073	4.66556	5.86476	4.76693	5.3931	5.46966	5.03353	5.54938	5.74985	3.97551
SIRPA	8.63083	8.60484	8.62803	8.80656	9.15901	8.81124	8.21015	7.94502	10.3605	8.14285	8.86967	7.8137	8.22205	9.33585	8.44842	8.82497	7.71059	8.29933	8.1112	8.56926	8.39428	9.28279	8.55739	9.11127	8.95966	8.82565	9.04432	8.51116	10.2426	8.35505	8.21344	8.73075	9.16426	9.0988	9.6248	8.09622	8.09519	8.64719	8.41269	9.03305	9.827	9.92971	9.99645	8.20601	9.32592	8.30575	9.58925	8.96708	10.0025
ZBTB16	4.91818	5.00551	4.76888	4.98876	4.5017	5.15519	4.66912	4.40249	4.20188	4.6507	5.53309	5.12093	4.34692	5.16668	5.18696	4.80274	5.27365	4.93512	4.98928	4.60707	4.91987	4.79429	5.05436	4.40305	4.71152	4.84479	4.75384	4.10234	4.34909	4.95649	4.90087	4.61855	4.67914	4.96171	6.59286	4.80884	6.64673	4.66776	4.69966	6.32678	4.66556	6.39819	4.76693	4.40093	4.65486	5.03353	4.1917	4.67673	5.86112
HRAS	4.91818	5.00551	4.76888	4.98876	4.5017	4.96878	4.66912	5.20426	4.20188	4.6507	5.20379	5.12093	4.34692	5.16668	5.18696	4.80274	5.27365	4.93512	4.98928	4.60707	4.91987	4.79429	5.05436	4.40305	4.71152	4.84479	4.75384	4.80457	4.34909	4.95649	4.91423	4.84539	4.67914	4.96171	5.28166	4.80884	4.31028	4.66776	4.69966	4.42073	4.66556	3.88692	4.76693	4.40093	4.65486	5.03353	4.93933	4.67673	3.97551
KIR3DL1	4.91818	5.00551	4.76888	4.98876	4.5017	7.25035	4.66912	4.40249	4.20188	4.6507	6.76387	5.12093	4.34692	5.16668	5.18696	4.80274	5.27365	4.93512	4.98928	4.60707	4.91987	4.79429	5.05436	4.40305	4.71152	4.84479	4.75384	4.10234	4.34909	4.95649	4.90087	5.0447	4.67914	4.96171	7.82139	4.80884	8.26144	4.66776	4.69966	6.86022	4.66556	7.70429	4.76693	4.40093	4.65486	5.03353	4.1917	4.67673	6.55502
CD19	5.83486	6.37912	5.71745	6.42451	5.88522	7.46835	5.84013	6.93362	6.0558	5.8048	6.73856	6.07159	6.14676	5.70252	6.44842	5.57704	6.73511	6.5082	6.51216	5.9843	6.48855	6.13934	6.48463	5.87304	5.82937	6.39541	4.75384	6.56538	4.34909	5.5367	7.12368	5.33843	4.67914	6.05114	7.49256	6.00377	7.50471	6.32526	5.90231	6.7793	6.03951	7.33108	4.76693	6.48743	4.65486	6.52092	5.49876	5.88735	7.94359
RIPK1	7.69603	7.19752	7.8625	7.89229	8.60632	8.52019	8.46131	7.83285	9.27819	7.56747	8.152	7.3159	7.41265	8.64397	7.82261	7.56127	7.54478	7.48289	7.62437	8.43055	7.91441	8.11953	7.74213	8.18971	8.91061	7.45528	9.14152	7.73268	9.55342	8.30677	7.98032	7.96087	9.23582	7.56248	8.74594	8.16423	9.05045	7.98984	7.62579	8.9615	8.02408	8.78675	8.22152	7.22804	8.74096	7.66158	9.26126	9.31056	8.57456
TAPBP	8.20878	8.04942	8.37015	8.17371	9.06014	9.43723	8.62282	8.05437	11.405	8.17456	9.47297	7.9739	8.14676	8.94699	7.82801	8.21335	7.85183	7.95273	7.8084	9.08863	7.97769	8.60591	8.31781	8.51374	9.16531	8.20626	9.28162	8.06091	10.306	8.90177	8.24515	8.20944	9.67394	8.08834	10.1099	8.55293	10.1386	8.23828	7.6855	9.89904	8.72333	9.26429	9.30558	8.55433	9.75123	8.01007	9.59227	9.62759	10.082
MALT1	8.36589	8.56106	8.71745	7.93601	7.8625	7.12203	7.98539	8.64633	7.44484	8.13964	6.78875	8.77467	8.04906	8.11346	8.2894	8.61572	8.53084	8.34219	7.96385	7.48255	8.27338	8.28279	8.14498	8.11405	8.27917	8.44351	7.07032	8.06927	7.32754	8.28393	8.74712	8.60225	7.79469	8.5587	7.05033	8.80809	7.01596	8.40003	8.07596	6.43641	7.78871	6.61683	7.96232	8.33339	8.10353	8.33571	8.18326	8.08136	6.92341
CD40LG	6.86758	6.34776	6.0614	6.51378	6.34465	5.46835	6.12741	6.26012	4.20188	6.69539	4.87258	6.63347	6.00237	6.41302	6.54328	6.65339	6.34684	6.98464	5.74662	6.01992	6.24279	6.60591	6.53354	6.13607	6.25318	6.51277	5.58489	6.54153	6.61482	6.58732	6.66912	6.58236	6.08897	7.06187	5.22721	7.09622	6.34717	6.8792	6.38294	5.7793	5.77033	5.66122	6.65566	6.76861	5.65607	6.60531	5.97681	5.84296	5.23309
TMEM173	7.15414	6.69795	7.15656	6.88115	7.37707	8.46395	7.26126	6.61455	9.91141	7.01557	8.84022	6.98306	6.5358	7.51922	6.78429	7.37541	6.9318	6.78165	6.94826	7.37661	6.90792	7.01619	6.21161	7.29135	7.71022	6.74159	8.64378	6.90143	10.2164	7.55589	7.14305	7.03302	7.70788	6.72652	8.96971	7.22919	8.44547	6.9406	6.64597	8.24878	7.19917	9.42096	7.68386	7.78356	8.36657	6.88735	9.0357	7.83164	9.7044
ICAM3	6.52611	6.37912	6.39205	7.2708	7.14261	7.09948	6.41691	6.08562	8.75095	5.63285	7.17577	5.98306	6.5618	7.18561	6.76192	6.4458	5.95982	6.33513	6.30734	7.45678	6.22203	7.49753	6.41673	6.97432	7.02641	6.8347	6.98178	6.67904	7.48929	5.75171	6.14305	6.80475	7.20445	7.05114	7.70668	6.20171	7.90726	7.03746	7.01521	7.64871	7.34291	7.53569	7.79144	6.93853	6.96923	6.19028	7.23056	6.86533	7.46016
IRF7	5.83486	5.2994	5.99429	5.97845	9.62162	9.43047	8.90585	5.16579	10.803	6.36249	8.70302	5.98306	4.34692	8.98792	5.40577	5.83484	5.27365	5.6169	4.98928	9.23222	5.24279	5.60591	6.434	6.73554	9.58034	6.18519	10.3362	5.63464	10.7758	8.32926	5.23616	5.21979	10.0454	5.84304	9.59823	8.16423	10.439	5.52556	5.64597	10.0647	6.39182	8.97877	9.00392	5.5412	10.0711	5.03353	10.4244	9.5945	9.53853
CXCR6	5.19596	5.00551	5.44327	4.99921	4.5017	4.12887	4.66912	5.83898	4.20188	5.2598	4.48415	5.12093	4.34692	5.16668	5.18696	5.14094	5.27365	4.93512	4.98928	4.60707	4.91987	5.35798	5.05436	4.99857	4.71152	4.84479	4.75384	5.442	4.34909	5.12166	5.46882	5.67546	4.67914	4.96171	6.14148	5.23824	6.55362	5.81507	5.2834	4.42073	5.34291	5.31727	4.76693	4.991	4.65486	5.03353	5.21497	4.67673	3.97551
PSMC2	7.55452	8.14375	9.04215	7.99921	8.08979	8.59058	8.21015	8.50708	8.80304	7.95112	8.63263	8.09713	8.90419	7.843	8.2933	8.18276	8.66877	7.76074	8.46361	8.81719	7.92086	8.82151	8.30378	8.10849	8.85984	8.42566	7.94478	8.42906	9.26508	8.10003	8.15264	8.49989	9.22022	7.62168	8.538	8.11598	9.02177	8.67154	8.31525	8.33624	8.51835	8.78675	7.59756	8.18365	8.32592	8.27516	8.59227	8.80296	8.63164
IL21R	6.50131	6.26623	6.35686	6.19185	5.92961	7.17689	6.22427	6.29619	7.52147	6.29485	7.45754	6.3517	6.14676	6.14998	6.42013	6.30141	6.3679	6.29206	6.15262	6.30622	6.28343	6.05842	6.17097	6.2002	6.35446	6.32012	7.57282	5.9922	6.35179	6.05127	6.32362	6.53345	5.65085	6.64327	6.83055	6.48616	7.19105	6.41453	6.64597	6.88621	5.65485	7.65025	6.36193	6.69144	5.89708	6.44966	6.84115	5.59785	7.35862
TNFRSF1B	7.58631	7.05913	7.71049	8.00948	7.98851	8.5784	8.26126	7.58569	9.80814	7.49899	8.75127	7.08867	7.21387	7.71882	7.77873	7.80837	7.41925	7.50191	7.83409	8.37661	7.76456	7.92784	8.00747	8.08036	8.37269	7.50145	8.89717	7.442	9.81558	8.06919	7.0741	7.69042	8.54841	7.49285	8.82139	7.64423	9.29539	7.21362	8.0459	8.9615	7.91955	9.53867	8.36774	7.97155	8.95153	8.09425	9.4396	8.05241	9.47063
HSPB1	4.91818	5.00551	4.76888	4.98876	4.5017	7.74016	4.66912	4.40249	6.57038	4.6507	6.47297	5.12093	4.34692	5.16668	5.18696	4.80274	5.27365	4.93512	4.98928	4.60707	4.91987	4.79429	5.05436	4.40305	4.71152	4.84479	4.75384	4.10234	6.4449	4.95649	4.90087	4.61855	4.67914	4.96171	7.40941	4.80884	7.27122	4.66776	4.69966	7.7931	4.66556	6.76658	4.76693	4.40093	4.65486	5.03353	4.1917	4.67673	8.41029
TCF7	5.459	6.00989	6.0831	5.32936	5.0145	7.33962	4.81546	5.83898	6.30734	5.7885	6.48824	5.72367	5.3983	5.16668	5.54328	5.93612	5.84434	6.12214	4.98928	4.60707	5.20097	4.79429	5.56525	5.64627	5.3298	5.68269	4.75384	5.92005	5.96846	5.66008	6.08416	6.0905	4.67914	6.25184	7.85769	5.8232	7.48803	5.77067	4.69966	7.18738	5.23981	7.14039	4.76693	7.40281	5.46966	5.46781	4.1917	5.74985	8.19993
CCR7	6.89323	7.67917	6.73125	6.09874	6.91864	5.83872	5.81546	6.64284	5.98541	6.77201	5.61882	7.18707	5.33941	6.94353	6.18818	6.66819	6.28174	7.27004	5.81701	5.9843	5.78593	6.31218	6.10778	5.7641	6.49419	5.87032	4.75384	6.56538	6.4449	6.81681	6.51414	6.70521	5.65085	7.8738	5.7747	7.18309	6.78969	6.26253	6.23093	5.98575	5.65485	6.04309	7.02244	7.45043	5.82113	6.07662	5.82069	5.88735	6.19993
CCR8	4.91818	5.00551	4.76888	4.98876	4.5017	4.12887	4.66912	4.40249	4.20188	4.6507	4.48415	5.12093	4.34692	5.16668	5.18696	4.80274	5.27365	4.93512	4.98928	4.60707	4.91987	4.79429	5.05436	4.40305	4.71152	4.84479	4.75384	4.10234	4.34909	4.95649	4.90087	4.61855	4.67914	4.96171	4.12597	4.80884	4.31028	4.66776	4.69966	4.42073	4.66556	3.88692	4.76693	4.40093	4.65486	5.03353	4.1917	4.67673	3.97551
CASP1	9.25279	8.10675	8.80817	9.01713	10.8596	10.7042	10.5602	8.77012	12.2883	8.99085	10.1327	8.87403	8.40549	10.8139	8.56927	8.57704	8.81396	8.69888	8.87178	10.7013	8.99309	8.96531	9.40582	9.3678	10.691	8.63689	12.3905	8.37611	12.4687	10.198	8.56528	8.70889	11.3242	8.36876	11.0717	9.68284	11.8827	8.29424	8.74751	11.3895	8.98875	10.7461	10.9861	8.24973	11.8027	9.29817	12.08	11.1039	10.6363
PDCD1LG2	4.91818	5.00551	4.76888	4.98876	5.27754	6.1108	5.16694	4.86323	7.12292	4.6507	5.82527	5.12093	4.34692	5.70252	5.18696	4.80274	5.27365	4.93512	4.98928	4.60707	4.91987	5.16534	5.74213	5.09168	4.71152	4.84479	6.40592	4.95657	6.83721	4.97727	4.90087	4.61855	5.78412	4.96171	7.70668	4.80884	7.47116	4.66776	4.69966	7.83374	4.66556	6.10868	5.834	4.40093	6.22639	5.35534	5.90086	4.67673	6.90294
GZMH	9.281	8.96409	9.70875	9.5011	7.5647	6.89216	10.006	10.2406	7.33591	9.6017	7.07825	9.85794	10.8138	8.08858	9.93059	8.84138	9.83491	9.6256	10.8478	9.32058	10.6292	10.4494	9.96204	10.4293	8.55928	9.04415	9.638	10.1063	8.90433	9.28393	9.09414	9.77875	9.61552	7.43627	7.90181	9.87341	7.34717	10.3424	10.2882	5.98575	9.69194	8.72535	7.53702	9.17517	9.19288	10.257	8.13435	9.2859	6.72786
SELPLG	7.94932	8.24936	8.09382	7.71541	8.52184	8.19295	8.20066	7.32266	9.54613	7.75952	8.43014	7.40038	7.72023	9.11346	7.35438	8.18791	6.91759	7.83763	7.62437	7.81212	7.76456	8.62477	8.09697	8.2158	8.91061	8.48431	8.89717	7.30707	9.73952	7.76826	7.16216	7.98532	8.72456	8.29339	8.1634	7.71721	8.18071	8.24641	7.35869	8.21841	8.55101	8.46858	9.45213	8.88755	9.1155	7.62162	9.21104	7.99271	8.93353
MAVS	4.91818	5.00551	4.76888	4.98876	4.5017	7.14422	4.66912	4.40249	5.91141	4.6507	5.98447	5.12093	4.34692	5.16668	5.18696	4.80274	5.27365	4.93512	4.98928	4.60707	4.91987	4.79429	5.05436	4.40305	4.71152	4.84479	4.75384	4.10234	4.34909	4.95649	4.90087	4.61855	4.67914	4.96171	6.7747	4.80884	6.9925	4.66776	4.69966	6.24878	4.66556	5.90223	4.76693	4.40093	4.65486	5.03353	4.1917	4.67673	8.07744
CLEC4A	7.72846	7.53345	7.07229	7.00948	8.31985	9.60865	7.4413	7.45618	11.5942	7.24196	8.71604	6.81883	7.33941	8.69017	6.43434	7.31087	7.4293	7.45061	7.08291	6.87182	6.81395	8.09269	7.46795	8.0973	7.71022	7.6108	9.70867	6.8441	10.7187	7.02396	7.48409	7.15659	7.97278	7.57751	10.4634	6.90499	10.1572	6.70141	6.98384	10.6806	8.67475	9.63085	8.93521	6.5235	9.19288	7.05277	8.41932	8.47958	10.2834
CREB1	8.2215	8.43988	8.34792	8.22748	8.45887	8.04744	8.16205	8.06486	9.06436	8.03643	7.65309	8.10554	7.92437	8.843	8.22135	8.3844	8.03416	8.28476	8.23848	8.25482	8.40353	8.48726	8.36362	8.59551	8.67639	8.56262	8.49818	8.2271	8.99179	8.27624	8.26738	8.14035	8.51044	8.58868	8.45158	8.2606	8.57747	8.42172	7.92726	8.72991	8.6895	8.15599	9.2311	8.13784	8.67237	8.21734	8.65719	8.68845	8.57456
CD276	4.91818	5.00551	4.76888	4.98876	4.5017	6.57023	4.66912	4.40249	6.30734	4.6507	5.96278	5.12093	4.34692	5.16668	5.18696	4.80274	5.27365	4.93512	4.98928	4.60707	4.91987	4.79429	5.05436	4.40305	4.71152	4.84479	4.75384	4.10234	4.34909	4.95649	4.90087	4.61855	4.67914	4.96171	6.6967	4.80884	6.61635	4.66776	4.69966	6.32678	4.66556	6.39819	4.76693	4.40093	4.65486	5.03353	4.1917	4.67673	8.23309
ITGB1	9.92466	9.51592	10.0871	9.79325	9.29673	9.09094	9.56481	10.0622	9.76677	9.92432	9.1496	10.0012	9.89399	9.07598	9.90147	9.87685	10.0554	9.94811	9.63901	9.64536	9.64294	9.99642	9.87774	9.71007	9.84468	10.0826	9.53598	10.1265	9.62481	9.75587	9.99505	9.71438	9.83365	9.35574	8.93616	10.1583	8.9925	10.1822	9.78211	9.60633	9.76105	9.53867	9.25636	9.23621	9.6506	9.83588	9.66007	9.68531	9.47063
NFATC2	6.92466	6.71033	6.89965	6.51378	6.07504	4.96878	6.6854	6.91053	4.20188	6.58645	4.77636	6.7878	6.84191	6.33055	6.7392	6.89897	6.68564	6.86238	6.59462	6.15422	6.80001	6.67991	6.50112	6.74989	6.08653	7.35826	6.07032	6.90143	6.30288	6.77374	7.04351	6.70521	6.74105	6.92757	5.33413	7.27386	5.5212	6.89996	6.40678	4.42073	6.65485	5.52372	6.10817	6.91157	6.44457	6.92724	5.6456	6.88735	5.4741
PPARG	4.91818	5.00551	4.76888	4.98876	4.5017	4.12887	4.66912	4.40249	4.20188	4.6507	4.48415	5.12093	4.34692	5.16668	5.18696	4.80274	5.27365	4.93512	4.98928	4.60707	4.91987	4.79429	5.05436	4.40305	4.71152	4.84479	4.75384	4.10234	4.34909	4.95649	4.90087	4.61855	4.67914	4.96171	4.12597	4.80884	5.45408	4.66776	4.69966	4.42073	4.66556	5.14039	4.76693	4.40093	4.65486	5.03353	4.1917	4.67673	3.97551
HSPB2	4.91818	6.14375	6.28379	5.72791	5.69257	7.74742	5.73884	6.02242	8.02104	5.37346	6.96278	6.03683	6.21387	6.81295	5.95174	6.56127	6.5073	6.05503	6.81701	7.10531	5.60536	6.89714	6.56525	6.46672	6.40256	6.32012	6.72239	6.51729	7.22626	5.0869	6.02276	6.0905	6.80518	5.84304	8.14882	5.50127	8.23169	6.38538	6.2834	7.67877	6.43912	7.76658	6.18909	5.5412	6.3396	6.12316	6.01333	6.39755	8.52855
IL5RA	4.91818	5.00551	4.76888	4.98876	5.79211	4.12887	5.16694	4.95634	4.20188	5.13642	4.48415	5.12093	4.34692	5.91552	5.18696	4.80274	5.27365	4.93512	4.98928	4.60707	4.91987	5.71553	5.82305	4.89903	4.71152	5.68269	4.75384	4.10234	4.34909	5.28393	5.04351	5.17797	4.67914	5.19451	4.12597	5.23824	4.31028	4.66776	4.69966	4.42073	4.66556	3.88692	6.02244	4.40093	4.65486	5.03353	4.1917	4.67673	3.97551
RNASEL	6.24659	5.33182	5.54057	6.15533	6.66658	7.47712	5.88822	5.95634	8.71877	5.89892	6.98447	5.94606	5.3983	7.52849	5.43434	5.14094	5.27365	6.2173	4.98928	6.70676	5.63707	5.84983	6.61154	5.92457	5.89808	6.06736	7.08739	4.10234	6.96846	6.31431	5.79687	5.64509	6.50401	5.47691	7.26824	6.04559	6.84313	4.66776	5.52044	7.30768	5.43912	6.82628	6.97759	5.09054	8.18911	5.95324	7.43287	7.36652	6.81806
CFD	11.27	11.2085	11.5883	11.4464	11.9757	7.46835	11.378	10.8819	9.15534	10.8114	7.54044	10.694	10.774	11.9655	11.1965	11.3972	11.0251	11.0994	11.2943	11.3418	11.246	11.5404	11.4031	11.7597	11.6017	11.6414	10.3	11.2929	10.4947	11.0681	10.9262	11.6032	11.076	11.7383	8.36597	10.9	8.30969	10.8178	11.215	8.37348	11.6181	8.57103	12.4415	11.2578	11.2973	11.2629	11.4654	11.8584	8.62541
IFIT3	8.73556	7.93272	7.99429	7.67082	13.6831	13.0915	13.3968	7.79554	14.9895	9.47627	12.1901	8.47369	7.90419	11.2936	7.35438	7.48811	7.46883	7.73417	7.90043	13.2935	8.05014	8.61537	10.0261	9.86976	13.7578	8.37695	15.0299	6.95657	15.0275	12.051	7.63533	7.54171	14.6184	8.18963	13.8884	12.1633	15.2988	7.82596	7.44183	14.3779	8.9647	13.3384	11.4287	6.88408	14.4702	9.1487	14.7651	13.6857	13.5329
IL11	4.91818	5.00551	4.76888	4.98876	4.5017	5.69576	4.66912	4.40249	4.20188	4.6507	5.04767	5.12093	4.34692	5.16668	5.18696	4.80274	5.27365	4.93512	4.98928	4.60707	4.91987	4.79429	5.05436	4.40305	4.71152	4.84479	4.75384	4.10234	4.34909	4.95649	4.90087	4.61855	4.67914	4.96171	6.01862	4.80884	6.89466	4.66776	4.69966	6.12325	4.66556	5.90223	4.76693	4.40093	4.65486	5.03353	4.1917	4.67673	6.41752
PDCD2	4.92466	5.04942	4.9712	4.98876	4.92961	4.91815	5.44934	5.0438	6.36392	4.82092	4.72574	5.12093	4.34692	5.16668	5.18696	5.05348	5.27365	5.27742	4.98928	4.60707	5.53977	5.52791	5.05436	4.89903	4.71152	4.84479	4.75384	5.09408	4.34909	4.95649	4.90087	4.61855	4.67914	4.96171	5.8487	5.30862	6.70562	4.66776	4.69966	5.93684	5.34291	6.52372	4.76693	5.09054	5.69914	5.03353	4.1917	4.67673	5.23309
CD47	10.1508	10.5133	10.7441	10.4187	10.9076	11.0838	10.6544	10.5618	12.7017	10.2056	10.5071	10.1459	10.3109	10.8421	10.5176	10.3607	10.5959	10.2192	10.4289	10.7068	10.4264	10.7874	10.5355	10.4678	10.7756	10.5434	11.9116	10.4801	12.9013	10.3551	10.6624	10.6764	10.9947	10.668	11.4678	10.4211	12.0013	10.478	10.2962	12.3912	10.5375	11.3941	11.0855	10.2538	11.1682	10.5436	11.4168	11.0897	11.2392
CEACAM8	7.12737	7.38686	7.77856	7.61139	7.90759	7.02966	7.44934	6.72452	8.79277	6.651	7.04767	6.13871	6.50933	7.7107	7.02871	7.78819	6.23666	7.13844	7.6046	6.83229	7.82775	7.98003	7.05291	8.51374	7.5271	7.56805	7.15373	7.02696	8.48929	6.2685	6.74712	8.22493	6.98206	7.96805	7.0025	6.43987	6.70562	6.57803	7.24423	7.69357	7.75171	7.84565	8.41896	7.73823	7.25553	7.50343	6.92022	7.63737	7.31282
TNFSF11	4.91818	5.00551	4.76888	4.98876	4.5017	4.28072	4.66912	4.40249	4.20188	4.6507	4.48415	5.12093	4.34692	5.16668	5.18696	4.80274	5.27365	4.93512	4.98928	4.60707	4.91987	4.79429	5.05436	4.40305	4.71152	4.84479	4.75384	4.10234	6.02986	4.95649	4.90087	4.61855	4.67914	4.96171	4.12597	4.80884	4.31028	4.66776	4.69966	4.42073	4.66556	4.93876	4.76693	4.40093	4.65486	5.03353	5.08372	4.67673	3.97551
IRGM	4.91818	5.00551	4.76888	4.98876	4.5017	4.81124	4.66912	4.40249	4.20188	4.6507	4.48415	5.12093	4.34692	5.16668	5.18696	4.80274	5.27365	4.93512	4.98928	4.60707	4.91987	4.79429	5.05436	4.40305	4.71152	4.84479	4.75384	4.10234	4.34909	4.95649	4.90087	4.61855	4.67914	4.96171	4.91909	4.80884	6.23169	4.66776	4.69966	4.42073	4.66556	5.14039	4.76693	4.40093	4.65486	5.03353	4.1917	4.67673	3.97551
S1PR1	8.06668	7.81151	8.05593	7.85861	7.43211	7.41458	7.36687	8.14616	7.98541	7.91403	7.26711	7.67928	7.74313	7.81295	8.14994	8.13029	8.25373	8.02903	7.77342	7.43055	8.03237	8.09945	7.9182	7.55929	7.75722	7.9722	7.35042	7.88257	7.46726	7.77919	8.29361	8.30967	7.3971	8.25652	7.96971	8.28263	8.20132	8.07445	7.91899	7.43641	7.26628	7.99187	7.53702	8.33339	7.55419	7.92724	7.52429	7.12836	7.63164
MBP	4.91818	6.12537	6.16675	5.39349	6.58566	6.28072	5.86437	4.86323	6.52147	4.91403	5.53309	5.12093	5.33941	6.68603	5.18696	5.91146	5.27365	5.12214	4.98928	5.61656	5.24279	6.00184	5.56525	5.89903	6.14424	5.72222	6.16985	5.09408	7.08875	4.95649	5.00169	6.19903	7.12292	5.98506	6.8487	5.12576	7.40162	6.12823	4.69966	6.40078	6.59345	6.39819	6.4301	6.35357	5.96923	5.57215	6.47276	5.70094	6.77366
FADD	5.98554	5.69795	5.79837	6.20977	6.189	6.35873	6.00188	6.12626	6.61768	5.85263	6.32777	5.7878	5.5618	6.22037	6.26971	6.2234	5.9873	5.7071	6.12514	5.87182	6.1579	6.38035	6.32709	6.06896	5.75722	5.68269	6.26296	5.67904	7.05961	6.49753	6.06398	6.28033	6.55464	5.73994	7.09663	6.14513	7.63162	6.12823	5.90231	7.05614	6.18536	7.27504	6.57766	5.991	6.49432	5.97877	6.57405	5.88735	6.90294
GBP1	10.3886	10.2901	10.349	9.92927	14.7982	13.8172	13.849	9.24174	15.0848	10.7921	13.8088	10.1377	9.59993	14.7672	9.12386	9.38215	9.60145	9.48289	9.73758	14.3962	9.56472	9.37757	12.0592	11.3048	14.752	11.0902	15.3195	9.17768	15.7041	13.5578	9.53811	9.17531	15.2221	10.1323	14.2582	13.0825	15.446	9.51887	9.64095	14.5708	10.6232	13.3968	14.5173	8.58879	15.3118	10.5732	15.6186	14.411	14.2007
TNF	5.06668	5.00551	5.68943	5.80066	5.97268	7.26055	6.02357	5.71122	7.52147	5.05699	6.69974	5.12093	5.92437	5.66936	5.43434	5.66819	5.27365	5.52069	5.85096	5.87182	5.53977	6.0859	5.79657	5.97432	6.08653	5.46696	5.678	5.95657	6.7303	5.56223	5.64215	5.26043	6.42458	5.65748	8.63006	5.61675	8.45408	6.60356	5.76145	7.63345	7.05478	8.16372	6.63655	5.76861	5.96923	6.00386	5.90086	4.67673	8.53521
CTLA4	5.91217	6.14375	5.10447	4.98876	5.49993	5.24008	5.3498	4.91053	4.20188	5.92898	5.77636	6.13871	4.34692	5.16668	5.18696	5.41103	5.81396	5.54535	4.98928	4.60707	4.91987	4.79429	5.17097	5.30113	4.71152	5.64205	4.75384	6.18923	5.83721	5.3732	5.3405	4.89786	4.67914	4.96171	5.9862	5.89359	6.94441	4.66776	4.69966	6.12325	4.66556	5.90223	4.76693	5.5412	5.61168	5.03353	4.93933	4.67673	4.86112
HDAC4	5.9615	5.7707	6.16675	5.86992	6.29461	6.33962	5.57219	5.41577	7.18705	6.09725	6.3107	5.65656	5.88373	7.18561	5.48984	5.93612	5.27365	6.29206	4.98928	6.18593	5.86839	6.92784	5.92433	6.30113	6.73861	6.24069	7.03555	5.21961	7.93675	6.10438	5.30655	6.28033	6.90611	6.3249	6.81217	6.18309	6.86912	6.55203	5.38294	6.40078	6.92787	6.61683	7.17592	6.6755	7.22639	5.84632	7.1992	6.09089	6.58102
IL4R	5.80814	6.06878	6.18693	6.36178	6.80408	7.22974	6.54244	6.08562	9.63503	6.28326	7.02691	6.05432	5.84191	6.60064	6.02871	5.96037	5.27365	5.81246	6.20606	6.21696	5.84143	6.35798	5.82305	6.22096	6.4491	6.00462	7.99088	6.2785	9.04481	6.15561	5.52894	5.79094	6.86658	6.47691	8.15613	6.34257	8.75525	6.2301	6.30894	8.62575	5.91119	7.10868	7.37352	6.16093	8.18153	5.95324	8.05773	6.05241	8.1487
PSMB7	8.21642	8.29118	8.70351	8.22748	8.20263	8.71442	8.40457	8.48772	9.20264	8.26276	9.07573	8.39695	8.1723	8.23178	8.36554	8.33888	8.35213	8.35271	8.54364	8.43716	8.31808	8.29462	8.30378	8.50953	8.47744	8.41364	8.3645	8.66255	8.45612	8.39823	8.27178	8.55811	8.50401	8.39445	8.34695	8.46705	7.98063	8.07445	8.41269	8.6411	8.13598	8.94775	8.38501	8.07239	8.58322	8.45422	8.7358	8.5434	8.69847
MASP1	4.91818	5.00551	4.76888	4.98876	4.5017	4.12887	4.66912	4.40249	4.20188	4.6507	4.48415	5.12093	4.34692	5.16668	5.18696	4.80274	5.27365	4.93512	4.98928	4.60707	4.91987	4.79429	5.05436	4.40305	4.71152	4.84479	4.75384	4.10234	4.34909	4.95649	4.90087	4.61855	4.67914	4.96171	4.12597	4.80884	4.31028	4.66776	4.69966	4.42073	4.66556	3.88692	4.76693	4.40093	4.65486	5.03353	4.1917	4.67673	3.97551
CHUK	7.37046	7.28291	7.81791	7.28778	7.48513	7.70326	7.73227	7.52619	8.18705	7.45835	7.6463	7.35876	7.12948	7.66094	7.22135	7.60037	7.2928	7.4109	7.51216	7.50786	7.6213	7.96531	7.38154	7.79212	7.55928	7.58958	7.3645	7.50501	7.63472	7.67771	7.70213	7.81842	7.69666	7.55491	7.7747	7.63741	6.78969	7.56509	7.30894	7.47117	7.33041	8.23154	7.65566	7.06629	7.61168	7.64573	8.06644	7.88735	8.2494
FCGR2A	10.3317	11.0519	11.1578	10.9567	12.1605	11.0548	11.4468	9.61276	13.5454	10.1994	11.0845	9.61886	11.0786	12.2557	10.3729	11.0457	9.51204	10.2505	10.3089	11.6757	10.7255	11.8957	10.8434	11.2969	12.1783	11.0156	13.4637	10.5264	14.966	10.5646	9.75972	11.1191	13.1945	11.2733	12.1099	10.3757	12.8727	11.4271	10.4009	12.9604	12.2622	12.0613	12.7839	10.2321	13.1108	10.3783	13.4715	11.1917	11.8289
PLA2G2E	4.91818	5.00551	4.76888	4.98876	4.5017	4.12887	4.66912	4.40249	4.20188	4.6507	4.48415	5.12093	4.34692	5.16668	5.18696	4.80274	5.27365	4.93512	4.98928	4.60707	4.91987	4.79429	5.05436	4.40305	4.71152	4.84479	4.75384	4.10234	4.34909	4.95649	4.90087	4.61855	4.67914	4.96171	6.05033	4.80884	6.76221	4.66776	4.69966	5.66382	4.66556	5.86476	4.76693	4.40093	4.65486	5.03353	4.1917	4.67673	4.77366
MMP3	4.91818	5.00551	4.76888	4.98876	4.5017	4.35873	4.66912	4.40249	4.20188	4.6507	4.48415	5.12093	4.34692	5.16668	5.18696	4.80274	5.27365	4.93512	4.98928	4.60707	4.91987	4.79429	5.05436	4.40305	4.71152	4.84479	4.75384	4.10234	4.34909	4.95649	4.90087	4.61855	4.67914	4.96171	5.28166	4.80884	6.30969	4.66776	4.69966	4.42073	4.66556	4.78675	4.76693	4.40093	4.65486	5.03353	4.1917	4.67673	5.4741
MAX	9.61068	9.54214	9.88891	9.60124	10.4999	10.0938	10.0893	9.72452	11.2007	9.50649	9.87258	9.3159	9.5618	10.4922	9.43434	9.61381	9.47854	9.56659	9.56935	9.71494	9.70222	9.91257	10.0779	10.043	10.146	9.84369	10.8972	9.39619	10.7803	9.74615	9.4669	9.69042	10.5295	9.88592	10.4094	9.77273	10.4259	9.58124	9.40974	10.9038	9.73522	10.3532	10.9284	9.35607	10.505	9.68698	10.4362	10.3268	10.5319
LTA	4.91818	5.00551	4.76888	4.98876	4.5017	4.12887	4.66912	4.40249	4.20188	4.6507	4.48415	5.12093	4.34692	5.16668	5.18696	4.80274	5.27365	4.93512	4.98928	4.60707	4.91987	4.79429	5.05436	4.40305	4.71152	4.84479	4.75384	4.10234	4.34909	4.95649	4.90087	4.61855	4.67914	4.96171	4.12597	4.80884	6.10616	4.66776	4.69966	4.42073	4.66556	5.31727	4.76693	4.40093	4.65486	5.03353	4.1917	4.67673	3.97551
MAP2K4	9.15679	9.87201	9.21913	9.03985	9.82186	8.80777	9.26354	9.64808	9.52147	9.53974	7.87839	9.44746	9.16383	9.85042	9.58369	8.91146	9.84434	9.36834	9.61945	9.40046	9.19032	9.27982	9.69811	9.20282	9.0902	9.64463	9.18182	9.47069	9.41068	9.36052	9.3405	9.1512	9.46484	9.91283	8.64051	9.36132	9.41932	9.14571	9.43024	9.432	9.02408	8.33793	9.54729	8.65532	9.6506	9.51875	8.89108	9.78254	8.10458
GATA3	4.91818	5.00551	4.76888	4.98876	4.5017	5.15519	4.66912	4.71122	4.20188	4.6507	4.50335	5.12093	4.34692	5.16668	5.18696	4.80274	5.27365	4.93512	4.98928	4.60707	4.91987	4.79429	5.05436	4.40305	4.71152	4.84479	4.75384	4.10234	4.34909	4.95649	4.90087	4.61855	4.67914	4.96171	5.52677	4.80884	6.48803	4.66776	4.69966	5.72271	4.66556	5.70429	4.76693	5.35357	4.65486	5.03353	4.1917	4.67673	5.58102
IKZF1	9.12872	8.90066	8.93289	8.95473	8.90759	9.04449	8.82785	9.03582	9.69691	8.96931	8.98985	8.90086	8.48236	8.88334	8.90658	8.99306	8.80627	8.94811	8.62437	8.76566	8.84483	8.99823	9.07511	8.81278	9.02257	8.87471	9.05304	8.97003	9.82428	9.3011	9.07158	8.93285	8.75735	9.0988	9.28499	9.30862	8.47962	9.06069	8.95986	9.08448	8.89855	9.37172	9.43564	9.14075	9.39304	8.79334	9.4923	8.96708	9.26551
PLAU	5.08905	5.00551	4.76888	5.75257	5.20715	6.60265	4.66912	4.4799	7.52147	4.6507	5.84912	5.12093	4.34692	5.16668	5.18696	4.91146	5.27365	4.93512	4.98928	5.30622	4.91987	6.38035	5.05436	4.40305	4.71152	4.84479	6.58489	4.10234	8.87953	4.95649	4.91423	4.73436	5.90611	4.96171	8.9862	4.80884	8.96866	4.66776	5.33403	7.53829	6.12878	8.02622	6.40773	4.40093	6.19664	5.27516	6.15084	4.67673	7.72786
CRADD	4.91818	5.00551	4.76888	4.98876	4.58566	8.15519	4.66912	4.60019	6.70788	4.6507	6.97367	5.12093	4.34692	5.16668	5.18696	4.80274	5.27365	4.93512	4.98928	4.60707	4.91987	4.79429	5.05436	4.40305	4.71152	4.84479	4.75384	4.95657	6.02986	4.95649	4.90087	4.79094	4.67914	4.96171	8.12668	4.80884	7.86912	4.66776	4.69966	7.40078	5.23981	7.86476	4.76693	4.76861	4.65486	5.03353	5.08372	4.67673	8.90294
PLA2G2A	4.91818	5.00551	4.76888	4.98876	4.5017	6.74016	4.66912	4.40249	4.20188	4.6507	5.61882	5.12093	4.34692	5.16668	5.18696	4.80274	5.27365	4.93512	4.98928	4.60707	4.91987	4.79429	5.05436	4.40305	4.71152	4.84479	4.75384	4.10234	6.08875	4.95649	4.90087	4.61855	4.67914	4.96171	7.0025	4.80884	7.56956	4.66776	4.69966	9.00959	4.66556	6.44972	4.76693	4.40093	4.65486	5.03353	4.1917	4.67673	4.94359
TARP	6.96754	7.11609	7.72437	7.13671	5.88522	5.46835	7.39211	7.86922	4.20188	6.91403	4.56224	7.20284	7.66133	6.50988	7.71029	7.00768	7.66877	7.29933	7.63415	6.9843	7.55645	7.67991	7.6564	7.34907	6.86414	7.54619	6.32185	7.48013	6.25225	6.70662	7.59371	7.92339	7.00044	7.30698	5.81217	7.27386	5.58533	7.79304	7.62579	5.72271	6.84248	5.14039	6.18909	7.79836	6.36657	7.6297	6.27637	6.90905	5.29722
LTBR	4.91818	5.00551	5.50886	5.29619	5.76786	6.41458	5.88822	4.71122	7.15534	4.91403	6.24031	5.12093	4.34692	5.73494	5.18696	5.2234	5.27365	4.93512	5.55398	5.41726	5.28343	5.26487	5.17097	5.04588	5.6011	4.84479	6.678	4.10234	7.25225	5.68354	5.08416	4.61855	6.3971	4.96171	6.96971	5.37574	6.27122	4.66776	4.69966	6.63345	5.94436	7.18669	5.72966	5.5412	6.87846	5.03353	6.54938	5.93042	7.26551
CFP	9.37956	8.97696	9.45372	9.4754	9.96203	10.1415	9.39627	8.87818	10.9373	9.01557	10.0681	8.99216	8.48236	9.83742	9.07933	9.49019	8.91401	9.11804	9.27332	9.22461	9.32052	9.51785	9.21661	9.81107	9.53252	9.26431	9.61758	9.06091	9.77581	9.49256	9.03835	9.48711	9.33328	9.63611	10.6586	9.14993	9.18071	8.98984	8.97589	10.3173	9.72333	10.6748	10.334	9.50557	9.80644	9.18754	9.77887	10.0548	11.0683
IL18	6.15414	6.45467	7.0614	6.86992	6.49993	8.04154	6.65792	6.64284	8.43167	6.07053	8.51084	6.26424	5.9639	6.54687	7.0748	6.42852	6.81396	5.96649	6.91655	6.9843	6.80001	6.64338	7.47632	6.94966	6.55928	7.34566	7.71142	7.07759	8.38741	6.2685	6.55809	6.93599	6.42458	6.79241	8.64051	6.4709	8.63919	6.52556	7.54214	9.15567	6.31781	8.62806	6.40773	6.5235	6.8015	6.9403	6.41932	6.5434	8.99766
TLR9	4.91818	5.00551	4.76888	4.98876	4.5017	6.04154	4.66912	4.40249	4.20188	4.6507	5.84912	5.12093	4.34692	5.16668	5.18696	4.80274	5.27365	4.93512	4.98928	4.60707	4.91987	4.79429	5.05436	4.40305	4.71152	4.84479	4.75384	4.10234	4.34909	4.95649	4.90087	4.61855	4.67914	4.96171	6.79356	4.80884	7.45408	4.66776	4.69966	6.40078	4.66556	6.54757	4.76693	4.40093	4.65486	5.03353	4.1917	4.67673	6.94359
IFIH1	7.60195	7.23228	7.39205	7.48463	11.2877	10.6057	10.7413	7.26012	12.1683	7.89892	9.87549	7.27919	7.00237	9.71477	7.20486	7.29188	6.68564	7.11392	7.1112	10.8948	7.55645	7.57715	8.07511	8.3817	11.1175	7.40759	12.2737	6.8441	12.5876	10.0836	7.0741	7.40339	11.7848	7.77947	11.253	9.80505	12.6029	7.26253	7.59499	12.147	8.13598	10.96	10.0389	7.01654	11.6636	7.99137	11.9482	11.4886	11.3177
IL26	4.91818	5.00551	4.76888	4.98876	4.5017	5.72551	4.66912	4.40249	4.20188	4.6507	4.72574	5.12093	4.34692	5.16668	5.18696	4.80274	5.27365	4.93512	4.98928	4.60707	4.91987	4.79429	5.05436	4.40305	4.71152	4.84479	4.75384	4.10234	4.34909	4.95649	4.90087	4.61855	4.67914	4.96171	6.61423	4.80884	6.86912	4.66776	4.69966	5.66382	4.66556	6.34475	4.76693	4.40093	4.65486	5.03353	4.1917	4.67673	5.16598
MARCO	4.91818	5.00551	4.76888	4.98876	4.5017	5.78322	4.66912	4.40249	6.47084	4.6507	5.00585	5.12093	4.34692	5.16668	5.18696	4.80274	5.27365	4.93512	4.98928	4.60707	4.91987	4.79429	5.05436	4.40305	4.71152	4.84479	6.40592	4.10234	4.34909	4.95649	4.90087	4.61855	4.67914	4.96171	6.73622	4.80884	6.06177	4.66776	4.69966	6.66382	4.66556	6.34475	4.76693	4.40093	4.65486	5.03353	4.1917	4.67673	5.63164
CD36	6.85458	5.19752	6.68943	5.62481	5.13315	6.85227	6.51207	5.91053	6.91141	6.30635	6.00585	6.79822	5.5618	5.16668	5.82801	6.51291	6.4492	6.20187	6.85096	6.15422	6.32296	5.26487	5.05436	6.04588	6.22671	5.60023	7.35042	5.80457	6.83721	6.05127	5.84497	6.61406	6.01858	5.15498	6.48097	6.23824	6.27122	5.72487	5.86836	7.83374	5.61421	7.20179	5.45213	6.64308	7.16627	6.23334	7.10079	5.93042	6.13121
KLRD1	7.30985	8.25359	7.99429	7.77079	6.54343	6.41458	7.84623	9.04114	4.20188	7.83289	5.94075	7.77731	7.85247	7.423	8.11947	7.00768	8.57679	7.95733	8.74662	7.54501	8.80351	7.83371	8.08061	8.39546	6.89808	7.50145	7.62051	8.42906	6.4449	7.39468	8.31937	8.49989	6.52955	7.45266	7.35966	7.73009	6.55362	8.03746	8.72871	6.03305	6.97678	7.27504	7.29038	7.8057	6.69914	8.40327	6.62214	8.09089	6.35862
TLR8	8.58041	8.61145	8.4558	8.70913	9.25591	7.8319	8.5574	7.98976	10.0601	8.14285	7.68657	7.77203	8.09429	9.54459	8.23765	8.47133	7.85929	8.52689	7.8923	8.73383	8.46224	9.28872	8.79323	8.78865	8.95966	8.78423	9.15778	7.97449	9.58445	8.44015	8.01752	8.72713	9.11872	8.92169	8.32767	8.43594	7.34717	8.51214	8.28983	8.35498	9.26628	8.33793	10.1693	7.99743	9.30168	8.25962	9.41932	9.04753	7.63164
NFATC4	4.91818	5.00551	4.76888	4.98876	4.5017	4.81124	4.66912	4.40249	4.20188	4.6507	4.50335	5.12093	4.34692	5.16668	5.18696	4.80274	5.27365	4.93512	4.98928	4.60707	4.91987	4.79429	5.05436	4.61524	4.71152	4.84479	4.75384	4.10234	4.34909	4.95649	4.90087	4.79094	4.67914	4.96171	5.28166	4.80884	4.31028	4.66776	4.69966	4.42073	4.66556	5.00915	4.76693	4.40093	4.65486	5.03353	4.1917	4.67673	3.97551
CLEC4E	7.95846	8.57806	6.33894	7.92521	8.72757	8.60265	7.33252	7.75724	11.191	7.36249	8.38191	7.18707	6.92437	9.15897	6.92179	7.41103	7.2928	7.69061	7.39048	7.05469	7.28343	8.51785	8.28486	8.4797	7.13003	8.34566	8.95877	7.30707	10.1419	6.74057	7.71513	7.91068	7.12292	8.75654	10.4969	6.51622	9.95961	6.89996	6.98384	10.3196	8.61935	9.00915	9.62448	6.22804	8.69383	7.70812	7.21497	8.7796	10.5134
CXCL11	4.91818	5.00551	4.76888	4.98876	5.09467	8.53706	4.76484	4.40249	7.61768	4.6507	7.39412	5.12093	5.21387	5.73494	5.18696	5.05348	5.27365	4.93512	4.98928	5.46972	4.91987	4.79429	5.05436	4.40305	4.71152	4.84479	6.43289	4.10234	7.67372	5.48423	4.90087	4.61855	6.34051	4.96171	8.97798	4.80884	10.0561	4.66776	4.69966	9.71185	4.66556	6.07626	4.76693	4.40093	7.13524	5.03353	6.57405	6.36652	8.54845
LAIR2	4.91818	5.00551	4.76888	4.98876	4.5017	7.98116	4.66912	4.40249	6.52147	4.6507	7.05793	5.12093	4.34692	5.16668	5.18696	4.80274	5.27365	4.93512	4.98928	4.60707	4.91987	4.79429	5.05436	4.40305	4.71152	4.84479	4.75384	4.10234	4.34909	4.95649	4.90087	4.61855	4.67914	4.96171	7.65605	4.80884	7.9925	4.66776	4.69966	7.5218	4.66556	7.51165	4.76693	4.40093	4.65486	5.03353	4.1917	4.67673	8.82351
SIGIRR	7.06103	6.95891	7.16675	6.61139	6.61314	7.55374	6.44934	6.8752	7.12292	6.9364	6.60488	7.32313	6.75444	6.26546	6.7277	7.27265	7.12974	7.13844	7.08291	6.1218	6.92086	6.86578	6.27051	6.64627	6.81167	6.32012	5.99993	6.97449	7.22626	7.40882	7.14305	6.84539	6.55464	7.04034	7.99438	7.22919	7.86912	7.30983	6.88544	7.43641	6.85996	7.57103	6.53702	8.16664	6.54242	6.76059	6.01333	6.5434	8.28936
BATF	5.04396	5.12537	5.66086	5.70281	6.20715	8.17149	6.02357	5.0438	10.0342	5.75533	7.55501	5.3517	5.14676	6.97101	5.18696	5.26293	5.61693	5.27742	5.46909	6.41726	5.9464	5.40237	5.6564	5.33961	6.82937	5.55716	7.51089	5.38953	9.85852	6.10438	5.23616	5.3759	6.62739	5.37737	9.11173	5.91631	9.46691	5.62865	5.56351	9.47546	5.43912	7.88362	6.36193	5.13784	7.03794	5.90077	7.18326	6.23528	8.29722
CFL1	10.521	10.3388	10.7959	10.521	10.9041	11.4094	10.9168	10.655	12.2055	10.5324	11.4619	10.5042	10.4037	10.8158	10.5101	10.6319	10.6147	10.5051	10.8095	10.7027	10.6034	10.8815	10.6341	10.8998	11.0388	10.4509	11.3191	10.5081	11.4866	10.637	10.4563	10.7298	10.9243	10.5348	11.2063	10.677	10.4943	10.3556	10.3754	11.5596	10.6039	11.7371	10.9303	10.5749	11.0711	10.6714	11.215	11.1626	11.4067
CD6	7.62127	8.03964	8.07229	7.32936	7.09467	5.86569	7.77766	8.00073	6.91141	7.8048	5.82527	7.8137	7.5358	7.39284	7.73346	8.3296	8.06673	8.0334	8.23848	7.1381	7.67575	7.51785	7.60393	7.93088	7.49419	7.91365	6.58489	8.16602	6.39909	7.42283	7.89151	8.02714	6.78412	7.75324	6.61423	7.87631	7.08413	7.53886	7.57408	6.03305	6.75171	6.44972	7.3266	8.68747	7.05462	7.98509	7.1992	7.05241	6.68055
IL4	4.91818	5.00551	4.76888	4.98876	4.5017	5.3962	4.66912	4.40249	6.18705	4.6507	5.24031	5.12093	4.34692	5.16668	5.18696	4.80274	5.27365	4.93512	4.98928	4.60707	4.91987	4.79429	5.05436	4.40305	4.71152	4.84479	5.43289	4.10234	5.96846	4.95649	4.90087	4.61855	4.67914	4.96171	6.05033	4.80884	6.45408	4.66776	4.69966	4.42073	4.66556	6.00915	4.76693	4.40093	4.65486	5.03353	4.1917	4.67673	5.41752
TRAF4	5.21642	5.7707	5.10447	5.45489	5.37707	5.96878	5.57219	5.71122	6.30734	5.23596	6.22216	5.8691	5.5618	5.16668	5.46236	5.4458	6.06673	5.7071	6.03941	5.52035	5.9464	5.78425	5.32709	5.79212	5.64174	5.55716	5.53598	5.49262	6.14534	5.34405	5.79687	5.73436	5.74105	5.47691	6.83055	5.4709	7.10616	5.62865	5.99961	6.43641	5.34291	6.39819	5.21509	5.43157	5.61168	5.60531	5.01333	5.65031	5.98312
CD8A	5.88686	5.64732	6.14629	5.82412	5.09467	6.48584	6.41691	6.75075	6.41837	5.83686	6.1472	6.47369	6.14676	5.60064	5.80631	5.41103	6.81396	6.2173	7.09712	5.9843	7.00832	6.38035	6.53354	6.55111	5.99538	6.18519	5.9634	5.9922	6.53236	6.12166	6.18102	6.43035	5.60355	5.71298	6.6967	6.34257	6.41932	6.32526	6.38294	6.24878	4.66556	6.47481	5.26572	6.8275	6.22639	6.78974	5.49876	6.45767	6.94359
IKBKAP	6.68139	6.91678	6.9712	6.93601	6.29461	5.75465	6.73884	6.98976	6.47084	6.82891	5.72574	7.13871	6.92437	6.76665	6.88086	6.73998	6.94588	7.01144	6.85096	7.01992	6.77172	7.2528	6.46795	6.7641	6.55928	6.92216	6.20156	6.93842	6.35179	6.76277	6.60073	7.0905	6.34051	6.79241	6.11173	7.00377	5.76221	7.12823	6.45333	6.20814	6.67475	5.42418	6.834	6.813	6.39304	6.68504	6.30611	6.65031	5.68055
CXCR1	8.3567	8.50885	7.68943	8.84147	9.57871	7.86569	8.19589	7.78288	10.0771	8.0739	7.29342	7.27173	7.93435	9.48388	7.99074	8.0924	7.02756	8.45387	6.79973	9.00666	7.68336	9.38865	8.19143	8.3863	9.05678	8.30718	10.289	8.04403	11.2147	7.54312	7.32362	8.59035	9.75465	9.36227	9.45751	8.14513	9.34717	8.49859	8.1199	9.69357	9.43912	8.5652	10.2904	8.01654	10.4222	7.6297	10.0816	9.26922	8.32056
C9	4.91818	5.00551	4.9239	4.98876	4.5017	4.35873	4.66912	4.71122	4.20188	4.6507	4.48415	5.12093	4.34692	5.16668	5.18696	4.80274	5.27365	4.93512	4.98928	4.60707	4.91987	4.79429	5.05436	4.55111	4.71152	5.51277	4.75384	5.38953	4.34909	4.95649	4.90087	4.99739	4.67914	4.96171	4.12597	4.80884	4.31028	4.66776	4.69966	6.40078	4.66556	4.78675	4.76693	4.40093	4.65486	5.03353	5.01333	4.67673	5.58102
TRAF1	6.14349	6.08789	6.50886	6.17371	5.66658	6.63436	6.22427	6.12626	6.12292	6.43759	6.24031	6.23387	6.33941	6.24309	6.44842	6.76772	6.46883	6.5696	7.12514	5.9103	6.98387	6.69783	6.08608	6.74989	5.64174	6.7607	5.53598	6.30707	6.53236	6.13873	6.57244	6.19903	5.98206	6.05114	7.9862	6.51622	9.31443	6.81507	6.62579	7.67877	6.29228	7.30333	5.76529	6.69144	5.69914	6.86013	5.54938	5.93042	7.97333
RHOA	9.10834	9.02236	9.54057	9.34971	9.37907	9.60865	9.22895	9.04909	10.2928	9.03815	10.158	9.03683	8.98806	9.26546	9.04037	9.24083	9.16326	9.03992	9.4526	9.2398	9.23504	9.36921	9.21411	9.51794	9.54328	9.55989	9.44949	9.19689	10.0888	9.10221	9.03835	9.49777	9.46484	9.32268	9.96764	9.19708	9.06177	9.12382	8.94365	9.5787	9.33041	10.6434	9.76748	9.45511	9.46343	9.12888	9.87131	9.60451	10.7919
CEACAM1	7.92466	9.3596	8.82114	8.20084	8.699	9.24779	8.12239	7.02242	10.4284	7.59585	8.61187	7.4072	6.50933	9.20888	7.76192	8.76084	6.9318	8.13844	7.93249	7.68474	8.35191	6.80092	7.88089	8.40909	8.27917	8.78423	7.73328	7.9922	7.85429	7.16397	6.90292	8.24532	6.05421	9.41968	9.1304	7.8292	6.9925	6.85814	7.84237	10.1848	6.87724	10.4129	9.35025	8.89789	6.16627	8.05877	6.57405	7.01288	8.58744
DEFB1	4.91818	5.00551	4.76888	5.22748	6.22507	5.66539	5.71237	4.40249	6.36392	4.6507	6.5183	5.12093	4.34692	5.41302	5.18696	4.80274	5.27365	4.93512	4.98928	5.79165	5.36143	4.79429	5.05436	5.44923	4.71152	4.84479	6.37844	5.21961	6.96846	4.95649	4.90087	4.61855	6.74105	4.96171	5.48097	4.80884	6.70562	4.66776	4.69966	5.66382	4.66556	5.52372	6.18909	4.40093	6.67777	5.43128	5.21497	4.67673	5.94359
ITLN1	4.91818	5.59485	5.71745	5.97845	5.17062	5.1108	5.08677	5.71122	6.61768	4.6507	4.48415	5.20284	4.34692	5.66936	5.93184	5.05348	5.27365	4.93512	5.46909	6.54501	4.91987	5.56743	5.50112	5.51794	5.6011	6.06736	4.75384	6.09408	6.61482	5.25291	5.12368	5.41243	5.74105	5.30698	5.57116	5.08623	7.27122	4.66776	5.90231	5.7793	5.29228	5.37172	4.76693	5.27111	5.51857	5.19028	5.44629	4.67673	3.97551
C4B	4.91818	5.00551	5.10447	4.98876	4.5017	7.02966	4.71237	4.60019	6.66348	4.6507	6.29342	5.12093	4.34692	5.16668	5.18696	4.96037	5.27365	4.93512	4.98928	4.60707	4.91987	4.79429	5.05436	4.40305	4.71152	4.84479	4.75384	5.2785	6.35179	4.95649	4.90087	4.61855	4.67914	4.96171	7.33413	4.80884	8.01596	4.66776	4.69966	7.14495	4.66556	7.04309	4.76693	4.40093	4.65486	5.03353	4.1917	4.67673	6.55502
KLRC3	8.28342	8.19752	8.58686	7.91977	6.79211	6.46835	8.26126	7.48772	7.57038	8.59351	6.18517	8.62472	8.69696	6.91552	8.21725	7.96637	7.22516	8.5964	9.41622	6.89119	9.47983	8.78005	8.08608	9.23379	7.14424	7.08262	7.80728	8.1738	7.08875	8.15561	6.96951	9.07919	7.1396	6.95084	5.95304	8.7618	5.64673	8.65332	8.76145	5.53829	8.02408	6.80665	6.71152	8.45977	7.46966	8.95645	6.86133	4.67673	5.98312
CD1E	4.91818	5.00551	4.76888	4.98876	4.5017	4.12887	4.66912	4.40249	4.20188	4.6507	4.48415	5.12093	4.34692	5.16668	5.18696	4.80274	5.27365	4.93512	4.98928	4.60707	4.91987	4.79429	5.05436	4.40305	4.71152	4.84479	4.75384	4.10234	4.34909	4.95649	4.90087	4.61855	4.67914	4.96171	4.12597	4.80884	4.31028	4.66776	4.69966	4.42073	4.66556	3.88692	4.76693	4.40093	4.65486	5.03353	4.1917	4.67673	3.97551
FN1	9.28585	8.43242	9.72091	9.66759	10.1367	7.32025	10.3062	9.15601	8.34998	9.56628	6.83725	8.88629	8.59365	9.45011	9.58369	10.1182	9.12974	8.86483	8.95217	10.2341	9.77707	9.86578	8.04169	9.56944	10.3862	7.30718	8.638	9.09408	8.60477	10.2202	9.64045	10.0462	10.6811	9.08045	8.65605	10.0117	8.10616	9.0971	9.44759	7.88621	9.90488	8.14039	9.53186	9.92511	9.62011	9.61349	10.5908	10.6325	7.77366
SH2D1A	6.30508	6.215	6.79837	6.24496	5.69257	4.28072	6.67173	7.25096	4.20188	6.6778	4.56224	6.6905	6.77681	5.8578	6.84938	6.37541	6.61693	6.71799	6.91655	6.08863	6.58924	6.52791	6.61154	6.72104	5.99538	6.57886	4.75384	7.38953	4.34909	6.67186	6.57244	7.16732	5.55464	6.21387	4.7747	6.58873	4.31028	6.72487	7.1199	4.42073	5.77033	3.88692	5.72966	6.92511	5.89708	6.80409	6.11767	6.42792	4.86112
TNFSF4	4.91818	5.00551	5.0614	4.98876	4.5017	4.69576	4.66912	4.41577	6.41837	4.6507	4.61882	5.12093	4.34692	5.16668	5.18696	4.80274	5.27365	4.93512	4.98928	4.60707	4.91987	4.79429	5.05436	4.40305	4.71152	4.84479	4.75384	4.10234	4.34909	4.95649	4.90087	4.89786	4.67914	4.96171	4.9862	4.80884	5.91975	4.66776	4.69966	4.42073	4.66556	5.00915	4.76693	4.88408	4.65486	5.03353	4.1917	4.67673	5.23309
LILRB5	4.91818	5.00551	4.76888	4.98876	4.5017	5.35873	4.81546	4.40249	7.0558	4.6507	5.08831	5.12093	4.34692	5.16668	5.18696	4.80274	5.27365	4.93512	4.98928	4.60707	4.91987	4.79429	5.05436	4.73554	4.71152	4.84479	4.75384	4.10234	4.34909	4.95649	4.90087	4.61855	4.67914	4.96171	6.45751	4.80884	6.89466	4.66776	4.69966	6.28831	4.66556	6.82628	4.76693	4.40093	4.65486	5.03353	4.1917	4.67673	3.97551
ITGAE	4.91818	5.00551	4.76888	4.98876	4.5017	7.54543	4.66912	4.40249	6.12292	4.6507	6.7128	5.12093	4.34692	5.16668	5.18696	4.80274	5.27365	4.93512	4.98928	4.60707	4.91987	4.79429	5.05436	4.40305	4.71152	4.84479	4.75384	4.10234	4.34909	4.95649	4.90087	4.61855	4.67914	4.96171	7.30813	4.80884	7.29058	4.66776	4.69966	6.80678	4.66556	6.68292	4.76693	4.40093	4.65486	5.03353	4.1917	4.67673	8.41029
MASP2	4.91818	5.00551	4.76888	4.98876	4.5017	5.50312	4.66912	4.40249	4.20188	4.6507	4.77636	5.12093	4.34692	5.16668	5.18696	4.80274	5.27365	4.93512	4.98928	4.60707	4.91987	4.79429	5.05436	4.40305	4.71152	4.84479	4.75384	4.10234	4.34909	4.95649	4.90087	4.61855	4.67914	4.96171	5.11173	4.80884	5.64673	4.66776	4.69966	5.83374	4.66556	5.47481	4.76693	4.40093	4.65486	5.03353	4.1917	4.67673	4.86112
HLA-DRA	11.5578	11.3238	11.8284	11.2915	11.7042	8.26562	12.1617	11.5525	9.43827	11.2807	8.42221	11.6483	11.2593	11.5846	11.6986	11.4933	11.8111	11.5408	12.1277	11.4984	11.835	11.484	11.4313	11.9438	11.6405	11.5022	9.97491	11.3506	9.31526	11.6166	11.773	11.5246	11.5382	11.6401	8.93191	11.6552	8.49639	11.226	11.2631	8.5787	11.0996	9.3583	11.7653	11.7238	11.3078	12.022	11.6521	11.6243	8.41029
IL17B	4.91818	5.00551	4.76888	4.98876	4.5017	7.4945	4.66912	4.40249	6.79277	4.6507	6.82527	5.12093	4.34692	5.16668	5.18696	4.80274	5.27365	4.93512	4.98928	4.60707	4.91987	4.79429	5.05436	4.40305	4.71152	4.84479	4.75384	4.10234	4.34909	4.95649	4.90087	4.61855	4.67914	4.96171	7.52677	4.80884	7.48803	4.66776	4.69966	7.07886	4.66556	7.3583	4.76693	4.40093	4.65486	5.03353	4.1917	4.67673	8.43187
C4BPA	4.91818	5.00551	4.76888	4.98876	4.5017	4.12887	4.66912	4.40249	4.20188	4.6507	4.48415	5.12093	4.34692	5.16668	5.18696	4.80274	5.27365	4.93512	4.98928	4.60707	4.91987	4.79429	5.05436	4.40305	4.71152	4.84479	4.75384	4.10234	4.34909	4.95649	4.90087	4.61855	4.67914	4.96171	4.12597	4.80884	4.31028	4.66776	4.69966	4.42073	4.66556	3.88692	4.76693	4.40093	4.65486	5.03353	4.1917	4.67673	4.94359
CD209	4.91818	5.00551	4.76888	4.98876	4.5017	5.89216	4.66912	4.40249	8.18705	4.6507	5.50335	5.12093	4.34692	5.16668	5.18696	4.80274	5.27365	4.93512	4.98928	4.60707	4.91987	4.79429	5.05436	4.40305	4.71152	4.84479	6.43289	4.10234	6.65435	4.95649	4.90087	4.61855	4.67914	4.96171	5.91909	4.80884	6.70562	4.66776	4.69966	6.50512	4.66556	6.10868	4.76693	4.40093	4.65486	5.03353	4.1917	4.67673	5.35862
TGFBI	7.84146	6.42493	7.87499	7.53526	7.43981	5.35873	7.81546	7.58569	6.47084	7.69101	5.12784	7.65082	6.00237	6.79768	7.11947	7.6901	7.4492	7.59935	7.13894	7.78131	7.10219	6.78425	7.07511	7.44923	8.06428	6.74159	7.64378	6.65701	6.14534	8.20102	7.61467	7.54171	7.82594	6.30698	5.6967	7.78049	6.81665	6.2301	6.98384	4.42073	6.89432	5.57103	7.36193	8.13201	8.54242	7.29563	8.44629	8.46501	3.97551
SELE	4.91818	5.00551	4.76888	4.98876	4.5017	5.15519	4.66912	4.40249	4.20188	4.6507	4.67327	5.12093	4.34692	5.16668	5.18696	4.80274	5.27365	4.93512	4.98928	4.60707	4.91987	4.79429	5.05436	4.40305	4.71152	4.84479	4.75384	4.10234	4.34909	4.95649	4.90087	4.61855	4.67914	4.96171	5.48097	4.80884	6.45408	4.66776	4.69966	5.7793	4.66556	6.26069	4.76693	4.40093	4.65486	5.03353	4.1917	4.67673	3.97551
CD8B	7.01505	6.40982	7.15656	5.72791	6.07504	6.74016	6.58684	7.58569	6.57038	6.96569	6.32777	7.41399	6.11199	6.24309	6.26971	7.25315	7.54478	7.27742	6.81701	5.52035	6.34233	5.91257	7.04169	6.55111	6.53791	6.53514	5.58489	6.1265	5.96846	7.13873	7.17162	7.0905	5.94458	6.58497	7.18498	7.25616	7.30969	6.47111	5.52044	6.07886	6.00849	7.15599	5.76529	7.37347	6.63405	6.71574	5.7358	6.90905	6.60655
MAFG	5.02087	5.00551	4.9712	5.67728	5.0145	8.63043	5.08677	4.81432	7.8923	4.88366	7.80103	5.12093	4.34692	5.41302	5.46236	5.69734	5.27365	5.05503	4.98928	5.74983	5.28343	5.35798	5.46795	5.04588	5.55928	5.90509	5.88745	5.54153	6.93675	5.42978	5.3405	5.29996	5.90611	5.19451	8.67143	5.56016	8.38369	4.66776	5.47605	8.06754	5.57239	8.43701	5.72966	5.64308	5.93361	5.03353	6.27637	4.67673	9.93101
CTSG	4.91818	5.00551	4.76888	4.98876	4.5017	4.12887	4.66912	4.40249	4.20188	4.6507	4.48415	5.12093	4.34692	5.16668	5.18696	4.80274	5.27365	4.93512	4.98928	4.60707	4.91987	4.79429	5.05436	4.40305	4.71152	4.84479	4.75384	4.10234	4.34909	4.95649	4.90087	4.61855	4.67914	4.96171	4.8487	4.80884	4.31028	4.66776	5.17649	4.42073	4.66556	3.88692	4.76693	4.40093	4.65486	5.03353	4.1917	4.67673	3.97551
LIF	4.91818	5.00551	4.76888	4.98876	4.5017	6.26055	4.66912	4.40249	5.91141	4.6507	5.67327	5.12093	4.34692	5.16668	5.18696	4.80274	5.27365	4.93512	4.98928	4.60707	4.91987	4.79429	5.05436	4.40305	4.71152	4.84479	4.75384	4.10234	4.34909	4.95649	4.90087	4.61855	4.67914	4.96171	7.05033	4.80884	7.32855	4.66776	4.69966	6.32678	4.66556	6.59411	4.76693	4.40093	4.65486	5.03353	4.1917	4.67673	5.72786
EWSR1	9.32524	9.21934	9.48053	9.14605	9.47206	9.33239	9.33252	9.509	10.2855	9.32907	8.96278	9.13255	8.95901	9.77057	9.25377	9.24577	9.5355	9.37351	9.23205	8.92915	9.3756	9.47692	9.40144	9.31568	9.38471	9.28756	9.17385	9.08585	9.73952	9.11305	9.4592	9.33368	9.24355	9.41968	9.07367	9.31077	9.50885	9.15005	8.92726	9.69357	9.15381	9.08851	9.63896	9.46442	9.52457	9.26482	9.34246	9.63737	9.22899
PPP1R12B	6.03246	5.88436	6.20683	6.29619	5.58566	5.3962	5.41691	6.29619	6.36392	5.91403	5.91838	5.94606	5.88373	5.99798	6.00985	6.11957	5.84434	6.13844	5.7101	5.61656	6.20097	6.00184	6.19143	5.84657	5.79375	6.12748	5.76546	6.24935	5.90433	5.89927	6.06398	6.19903	6.01858	6.47691	5.43366	6.22009	5.5212	6.4431	6.14847	4.42073	6.03951	5.47481	6.29038	5.64308	5.93361	6.10008	5.44629	5.79716	6.19993
HLA-DPA1	9.55251	9.41361	10.7313	9.80214	9.82186	6.68065	10.604	10.2737	7.47084	9.43759	6.90707	9.76674	9.90673	9.58739	10.2172	10.34	10.3809	9.5484	10.6305	10.1721	10.407	9.9164	9.7747	10.5501	10.7949	9.80509	8.40592	10.1185	8.04481	9.84958	10.2795	10.3337	9.71902	9.54348	8.34055	9.71559	7.94441	9.62865	9.70487	8.00959	9.43037	8.15599	9.82348	10.6665	9.2483	10.5868	10.3814	10.2566	8.13998
HLA-DMA	8.14082	7.82296	8.4558	8.38168	8.39697	5.89216	8.60853	8.15109	6.30734	8.15562	5.56224	8.4106	7.87338	8.20888	8.50339	8.15151	8.4343	8.19798	8.65351	8.34887	8.37089	7.92784	8.12384	8.52631	8.52167	8.52958	6.40592	8.7274	5.83721	8.46405	8.26738	7.71986	7.83621	7.97941	6.8487	8.32993	6.55362	7.88961	7.91068	6.80678	7.8858	6.90223	8.10122	8.3784	7.43186	8.42201	7.84115	8.65031	6.38837
HIF1A	8.71053	8.93008	8.93289	8.9387	9.76633	10.0679	9.26354	8.11621	11.6422	8.61447	10.2026	8.68771	8.36915	9.54001	8.6261	9.05348	8.22516	8.63999	8.81271	9.48255	8.22203	9.12947	8.63414	9.57952	9.54864	8.73677	10.223	9.00097	10.3786	8.83263	8.06398	9.03887	9.65666	9.04845	9.69168	8.59226	10.3904	8.378	8.54751	10.7845	9.23981	10.0113	9.80005	7.87713	10.219	8.3747	9.53689	9.46134	10.3957
KIT	6.15414	5.36353	4.87499	5.57036	5.83941	4.57023	5.41691	5.5413	5.91141	5.7885	4.82527	5.12093	4.34692	6.19729	5.18696	5.26293	5.27365	5.7071	5.85096	4.60707	5.75736	6.50773	6.8361	6.2616	4.71152	6.46696	4.75384	4.80457	6.30288	5.68354	5.72159	5.79094	4.67914	6.17488	6.30813	5.27386	6.84313	4.66776	5.23093	5.66382	6.4622	6.20179	6.21509	4.70721	4.65486	5.39381	4.1917	5.93042	4.77366
NCR1	4.91818	5.00551	4.76888	4.98876	4.5017	7.13317	4.76484	4.5413	6.57038	4.6507	6.60488	5.12093	5.45488	5.16668	5.18696	4.86083	5.27365	4.93512	4.98928	4.60707	5.39891	5.48726	5.05436	5.09168	4.71152	4.84479	4.75384	4.88257	5.90433	4.95649	4.90087	4.94848	4.67914	4.96171	7.57116	4.80884	7.71998	4.66776	4.69966	6.83374	4.66556	7.37172	4.76693	5.8275	4.65486	5.03353	4.1917	4.67673	7.16598
CCND3	8.74616	8.61145	8.32079	8.61812	9.16134	9.86234	9.02088	8.49937	11.0558	8.71708	9.91838	8.50264	8.01183	8.87609	8.38397	8.63468	8.21357	8.63137	8.1112	8.85219	8.62526	8.96531	8.92738	8.62695	9.15481	8.98444	10.1598	8.50501	10.647	8.93147	8.18102	8.60225	9.6421	8.67505	10.0045	8.84112	9.66539	8.71904	8.28983	10.2261	8.61935	10.4979	9.4301	8.33339	9.89013	8.59296	9.7868	9.26081	10.5517
TNFRSF17	4.91818	5.00551	4.76888	4.98876	4.5017	4.12887	4.66912	4.40249	4.20188	4.6507	4.77636	5.12093	4.34692	5.16668	5.18696	4.80274	5.27365	4.93512	4.98928	4.60707	4.91987	4.79429	5.36362	4.40305	4.71152	4.84479	4.75384	4.88257	4.34909	4.95649	4.90087	4.61855	4.67914	4.96171	4.12597	4.80884	6.30969	4.66776	4.69966	4.42073	4.66556	5.20179	4.76693	4.40093	4.65486	5.03353	4.1917	4.67673	3.97551
TNFRSF8	4.91818	5.00551	4.76888	4.98876	4.5017	5.43273	4.66912	4.40249	6.52147	4.6507	5.12784	5.12093	4.34692	5.16668	5.18696	4.80274	5.27365	4.93512	4.98928	4.60707	4.91987	4.79429	5.05436	4.40305	4.71152	4.84479	4.75384	4.10234	6.14534	4.95649	4.90087	4.61855	4.67914	4.96171	4.9862	4.80884	5.86912	4.66776	4.69966	5.72271	4.66556	5.47481	4.76693	4.40093	4.65486	5.03353	4.1917	4.67673	5.58102
C5	4.91818	5.00551	4.76888	4.98876	4.5017	4.50312	4.71237	4.40249	4.20188	4.6507	4.48415	5.12093	4.34692	5.16668	5.18696	4.80274	5.27365	4.93512	4.98928	4.60707	4.91987	4.79429	5.05436	4.40305	4.71152	4.84479	4.75384	4.10234	6.25225	4.95649	4.90087	4.61855	4.67914	4.96171	4.12597	4.80884	4.31028	4.66776	4.69966	4.42073	4.66556	3.88692	4.76693	4.40093	4.65486	5.03353	4.1917	4.67673	3.97551
CLEC7A	8.08627	7.82296	8.52876	8.25363	9.67312	9.05624	9.00733	8.07008	10.3639	7.99795	8.48824	7.99669	8.18907	8.94006	8.12824	8.49227	8.06028	7.77645	8.34951	8.72846	8.19566	8.5128	8.42539	8.71373	8.93125	8.24069	10.7495	7.46753	10.2328	8.59353	8.1139	7.81842	9.83365	7.90987	9.01461	8.15471	9.79308	8.0926	8.21076	9.61024	8.74702	10.0804	9.41616	8.21155	10.1254	8.73084	9.81552	8.97224	9.21661
RAPGEF2	4.91818	5.00551	4.76888	4.98876	4.5017	4.28072	4.66912	4.65678	4.20188	4.6507	4.48415	5.12093	4.34692	5.16668	5.18696	4.80274	5.27365	4.93512	4.98928	4.60707	4.91987	4.79429	5.05436	4.40305	4.71152	4.84479	4.75384	4.10234	4.34909	4.95649	4.90087	4.61855	4.67914	4.96171	4.12597	4.80884	4.31028	4.66776	4.69966	4.42073	4.66556	4.93876	4.76693	4.40093	4.65486	5.03353	4.1917	4.67673	3.97551
CXCL13	4.91818	5.00551	4.76888	4.98876	4.5017	4.28072	4.66912	4.40249	4.20188	4.6507	4.48415	5.12093	4.34692	5.16668	5.18696	4.80274	5.27365	4.93512	4.98928	4.60707	4.91987	4.79429	5.05436	4.40305	4.71152	4.84479	4.75384	4.10234	4.34909	4.95649	4.90087	4.61855	4.67914	4.96171	4.12597	4.80884	4.31028	4.66776	4.69966	4.42073	4.66556	3.88692	4.76693	4.40093	4.65486	5.03353	4.1917	4.67673	3.97551
CD274	7.2215	7.76478	7.28379	7.57036	10.7094	10.5946	9.67858	7.06486	12.0877	7.77201	10.2369	6.7878	8.16383	10.9556	7.44842	6.71169	6.9318	6.98464	7.06855	10.2265	6.959	8.42944	8.93347	7.99255	10.6849	8.49576	11.6481	7.45482	12.4797	9.74476	7.04351	6.73436	11.5398	7.67854	11.5929	8.8993	12.3803	8.24641	7.41856	11.8487	8.74231	10.1961	10.4176	6.41246	11.4936	7.56373	11.448	10.386	11.2933
RAG1	4.91818	5.00551	4.76888	4.98876	4.5017	4.86569	4.66912	4.40249	4.20188	4.6507	4.72574	5.12093	4.34692	5.16668	5.18696	4.80274	5.27365	4.93512	4.98928	4.60707	4.91987	4.79429	5.05436	4.40305	4.71152	4.84479	4.75384	4.10234	5.96846	4.95649	4.90087	4.61855	4.67914	4.96171	6.30813	4.80884	7.30969	4.66776	4.69966	6.07886	4.66556	6.17142	4.76693	4.40093	4.65486	5.03353	4.1917	4.67673	5.09559
STAT1	7.69967	7.38686	8.32535	8.2708	10.457	9.96099	10.2794	7.93362	10.8081	8.34588	10.097	7.79302	7.9639	10.7469	7.66279	7.4458	7.97362	7.32092	8.17958	10.6847	7.92086	8.2528	8.80324	8.99556	10.8161	8.22701	10.4362	7.45482	10.4811	10.0251	7.85675	7.72713	11.0365	7.8368	9.87107	9.75236	10.3286	7.81507	7.93548	9.97972	8.77955	10.1384	10.3864	7.76107	10.4897	8.16269	10.7303	11.0389	10.0168
LILRA5	7.9153	7.78833	7.5639	7.53526	8.60289	10.5579	7.80297	6.65678	12.5861	7.71277	10.4032	7.27173	6.98326	8.84672	7.26176	7.7259	6.84434	7.82761	7.28268	7.63965	7.88829	8.13277	7.3726	8.11405	8.04925	7.15662	9.89959	7.00968	8.98406	7.20508	6.43779	7.89786	8.10605	8.00742	9.76039	7.47855	8.75525	7.19694	7.34641	11.1795	8.00849	10.5564	9.61231	7.54997	9.67507	7.46781	8.71377	7.73778	10.2494
RRAD	4.91818	5.00551	4.76888	4.98876	4.5017	4.28072	4.66912	4.40249	4.20188	4.6507	4.48415	5.12093	4.34692	5.16668	5.18696	4.80274	5.27365	4.93512	4.98928	4.60707	4.91987	4.79429	5.05436	4.40305	4.71152	4.84479	4.75384	4.10234	4.34909	4.95649	4.90087	4.61855	4.67914	4.96171	4.12597	4.80884	4.31028	4.66776	4.69966	4.42073	4.66556	4.61683	4.76693	4.40093	4.65486	5.03353	4.1917	4.67673	3.97551
IKBKE	4.91818	5.00551	5.22646	4.98876	4.92961	5.75465	5.38375	5.60019	6.24845	4.68662	5.94075	5.20284	4.34692	5.16668	5.18696	5.26293	5.61693	5.05503	4.98928	4.60707	4.91987	5.60591	5.05436	5.22096	4.71152	4.84479	4.75384	5.09408	4.34909	5.01475	5.66912	5.44805	4.67914	5.47691	6.67652	4.8705	7.17029	5.62865	5.17649	6.28831	5.65485	6.95668	5.40773	6.04163	4.65486	5.46781	4.1917	4.67673	6.60655
GPI	8.33814	8.05913	8.74152	7.90884	8.25154	8.84212	8.57953	8.5413	9.1473	8.25685	9.03473	8.47694	8.27014	8.28201	8.05654	8.87685	8.78685	8.45712	8.86349	7.7604	8.73922	8.71553	8.29908	8.81619	8.72449	8.56805	8.42619	8.1738	8.57418	8.3218	8.48409	8.4348	8.42458	8.20906	8.32119	8.49751	8.40162	8.378	7.74283	8.71548	8.21285	9.40799	8.40773	9.30259	8.44457	8.66552	8.74669	8.65674	8.52185
FCGR3	8.73733	8.12074	9.25541	8.72791	9.80408	9.11361	9.88229	8.72782	10.6465	8.71708	8.2493	8.88873	8.52923	8.88695	8.45192	8.52921	8.7632	8.65423	9.77342	9.48574	9.39196	8.69337	9.68012	9.53876	9.65421	9.05193	11.4371	8.38953	8.10311	9.68354	8.1669	8.96087	9.005	7.70615	9.14516	9.06605	9.58533	8.71319	9.08707	9.35963	8.25311	10.3532	9.96424	8.50557	10.8994	9.56373	11.4219	8.79133	9.53521
NEFL	4.91818	5.00551	4.76888	4.98876	4.5017	5.1108	4.66912	4.40249	4.20188	4.6507	4.50335	5.12093	4.34692	5.16668	5.18696	4.80274	5.27365	4.93512	4.98928	4.60707	4.91987	4.79429	5.05436	4.40305	4.71152	4.84479	4.75384	4.10234	4.34909	4.95649	4.90087	4.61855	4.67914	4.96171	6.01862	4.80884	6.19105	4.66776	4.69966	4.42073	4.66556	5.66122	4.76693	4.40093	4.65486	5.03353	4.1917	4.67673	4.86112
LTK	4.91818	5.00551	4.76888	4.98876	4.5017	4.28072	4.66912	4.40249	4.20188	4.6507	4.48415	5.12093	4.34692	5.16668	5.18696	4.80274	5.27365	4.93512	4.98928	4.60707	4.91987	4.79429	5.05436	4.40305	4.71152	4.84479	4.75384	4.10234	4.34909	4.95649	4.90087	4.61855	4.67914	4.96171	4.12597	4.80884	4.31028	4.66776	4.69966	4.42073	4.66556	3.88692	4.76693	4.40093	4.65486	5.03353	4.1917	4.67673	3.97551
IL10RB	8.53428	8.32378	8.96537	8.99146	9.00416	9.63632	8.76805	8.35294	10.9741	8.32059	9.65648	8.34106	8.8472	9.62463	8.98592	8.80502	8.18419	8.53307	8.50151	9.71222	8.8617	9.5892	9.03037	8.93088	9.7847	8.93903	10.0895	8.84896	11.1931	8.75448	8.30225	8.86199	9.79205	8.4849	10.176	8.4709	10.5834	9.05144	8.82478	10.4276	9.48774	10.3916	9.40491	8.34855	9.93135	8.68891	10.2895	9.15584	11.1191
TGFBR2	9.19209	9.22151	9.075	9.19411	9.42631	9.32512	9.23825	8.81742	11.5898	8.96388	8.75127	8.60112	8.72599	9.74493	8.92431	9.16461	8.65598	9.0334	8.96385	9.02431	9.26071	9.5723	9.2389	9.62695	9.68127	9.37075	10.2648	9.12248	11.5586	9.00779	8.64894	9.0447	9.37965	9.51644	9.98004	8.7618	9.81999	8.89479	8.82034	10.1368	9.51835	9.90454	10.194	9.01337	10.1682	8.94678	10.2441	9.3428	10.3549
LILRA6	4.91818	5.00551	4.76888	4.98876	4.5017	6.63436	4.66912	4.40249	6.24845	4.6507	5.67327	5.12093	4.34692	5.16668	5.18696	4.80274	5.27365	4.93512	4.98928	4.60707	4.91987	4.79429	5.05436	4.40305	4.71152	4.84479	4.75384	4.10234	4.34909	4.95649	4.90087	4.61855	4.67914	4.96171	7.09663	4.80884	7.23169	4.66776	4.69966	6.7793	4.66556	6.52372	4.76693	4.40093	4.65486	5.03353	4.1917	4.67673	7.46016
JAK3	4.97357	5.00551	5.14629	4.98876	4.79211	7.14422	4.95748	5.27826	7.59422	5.08395	6.6463	5.12093	5.3983	5.16668	5.18696	4.80274	5.27365	5.18627	5.59462	4.60707	4.91987	5.16534	5.05436	5.09168	4.71152	4.84479	4.75384	5.49262	4.34909	5.01475	5.08416	4.61855	4.67914	4.96171	7.06593	4.8232	7.21151	4.66776	5.23093	6.9615	4.66556	7.17142	5.40773	6.16093	5.46966	5.03353	5.01333	4.67673	7.91321
HMGB2	8.24907	8.45099	8.62434	8.38168	8.40485	8.59058	8.18148	8.58204	9.44484	8.30635	9.01905	8.22617	8.12076	8.25432	8.39128	8.21839	8.52616	8.27004	8.75112	7.9843	8.3756	8.46127	8.75936	8.60738	8.01871	8.57886	7.76546	8.61764	8.64457	7.90427	8.09414	8.14578	7.85653	8.25652	8.1992	8.10613	8.37465	8.26253	8.32154	9.2286	8.17143	8.47481	8.55748	7.891	8.21901	8.36988	7.79993	8.50829	8.68055
TGFBR1	9.56253	9.28083	9.81305	9.32731	9.37105	8.02369	8.949	8.90178	8.84339	8.99085	8.12295	8.54656	8.90419	9.70457	8.85468	9.69372	8.46395	9.44734	9.11469	8.20153	9.63314	10.2739	9.75765	9.97585	9.45766	9.72709	7.65528	8.62333	8.23931	8.92656	9.04609	9.85371	9.06298	9.80683	8.19211	8.76493	7.14923	9.23828	8.76145	8.09008	10.1051	8.40473	10.4657	9.20324	8.46966	9.16825	8.91057	9.03772	8.36612
IL18R1	5.82157	5.62132	5.44327	5.42451	5.90759	8.77258	5.44934	6.0438	10.5853	5.59585	9.1496	5.32313	5.5618	6.60064	5.18696	5.47974	5.54478	5.77123	4.98928	5.61656	5.78593	6.35798	5.6564	5.64627	4.71152	5.8347	7.84792	5.38953	10.892	5.79543	5.91423	5.54993	6.12292	5.47691	8.7747	5.37574	8.41932	6.0926	4.69966	9.9676	6.36757	8.52972	6.97759	5.70721	7.6451	5.76059	6.54938	6.23528	8.24127
LTF	4.97357	7.14375	5.60197	7.03985	6.32816	8.09379	5.54244	7.06486	10.2181	4.88366	5.91838	5.12093	7.84191	6.39284	5.84938	5.41103	6.38866	4.93512	4.98928	7.58123	5.20097	7.83371	5.62665	5.22096	5.99538	5.7607	6.60874	7.09408	12.2417	4.95649	6.38996	4.89786	9.84132	5.37737	9.1992	4.80884	7.84313	7.53886	6.85109	11.9477	8.1644	9.15986	6.18909	5.13784	6.10353	5.39381	6.15084	7.18281	8.01207
IL2	4.91818	5.00551	4.76888	4.98876	4.5017	5.43273	4.66912	4.40249	6.41837	4.6507	5.08831	5.12093	4.34692	5.16668	5.18696	4.80274	5.27365	4.93512	4.98928	4.60707	4.91987	4.79429	5.05436	4.40305	4.71152	4.84479	4.75384	4.10234	6.69282	4.95649	4.90087	4.61855	4.67914	4.96171	5.28166	4.80884	4.31028	4.66776	4.69966	5.83374	4.66556	6.04309	4.76693	4.40093	4.65486	5.03353	4.93933	4.67673	3.97551
ALOX15	4.91818	8.18426	7.95952	9.00692	8.01964	5.32025	6.64398	7.85115	6.75095	5.91403	5.12784	6.00121	7.91431	7.89414	8.78429	6.8479	7.68564	5.24767	6.20606	10.1582	5.89487	7.85783	7.06406	5.94966	7.41433	8.02847	5.84792	8.64027	8.36376	5.91917	7.09414	6.79094	8.49107	7.18473	5.38475	5.64423	6.78969	7.67756	9.32467	7.41871	7.45071	5.82628	6.80005	6.6755	5.85961	6.27516	6.75749	7.87638	3.97551
CCL19	4.91818	5.00551	4.76888	4.98876	4.5017	7.07658	4.66912	4.40249	7.70788	4.6507	6.88417	5.12093	4.34692	5.16668	5.18696	4.80274	5.27365	4.93512	4.98928	4.60707	4.91987	4.79429	5.05436	4.40305	4.71152	4.84479	6.56064	4.10234	7.63472	4.95649	4.90087	4.61855	4.67914	4.96171	7.15613	4.80884	7.40162	4.66776	4.69966	7.55459	4.66556	7.47481	4.76693	4.40093	5.56587	5.03353	5.86133	4.67673	6.81806
CARD9	6.68873	6.40982	6.77189	6.81244	7.20715	7.71813	7.4413	6.5413	8.20264	6.35143	7.78257	6.82902	5.45488	6.63541	6.39128	6.8479	6.61693	6.66271	7.15262	6.9843	7.13587	6.31218	6.36362	7.50953	7.02641	6.49005	7.86782	7.00968	7.93675	6.85863	6.62848	6.74871	6.47802	6.89195	7.79356	6.58873	7.45408	5.57803	6.8336	7.80678	6.59345	8.30333	7.61719	7.02914	7.55419	7.05277	7.56177	7.35075	7.94359
S100A8	12.1158	11.8844	11.9727	13.2153	13.9118	17.1955	12.8687	11.4229	18.5947	11.6518	17.1905	10.4417	12.0679	13.7349	12.3976	12.559	10.8722	11.4656	11.3731	13.8077	12.1977	13.7762	11.9281	13.4934	13.8546	11.0026	17.1586	12.304	17.9853	11.6781	10.7046	12.9051	14.4505	12.2863	17.1162	10.8255	16.9151	12.1549	12.5415	17.7435	14.0412	17.7935	14.7976	11.2685	16.3322	11.8354	16.1535	13.9154	17.1795
DEFB103A	4.91818	5.00551	4.76888	4.98876	4.5017	4.75465	4.66912	4.40249	4.20188	4.6507	4.87258	5.12093	4.34692	5.16668	5.18696	4.80274	5.27365	4.93512	4.98928	4.60707	4.91987	4.79429	5.05436	4.40305	4.71152	4.84479	4.75384	4.10234	4.34909	4.95649	4.90087	4.61855	4.67914	4.96171	5.05033	4.80884	5.96866	4.66776	4.69966	4.42073	4.66556	5.66122	4.76693	4.40093	4.65486	5.03353	4.1917	4.67673	3.97551
TPSAB1	4.91818	5.00551	4.76888	4.98876	4.5017	5.57023	4.66912	4.40249	4.20188	4.6507	5.08831	5.12093	4.34692	5.16668	5.18696	4.80274	5.27365	4.93512	4.98928	4.60707	4.91987	4.79429	5.05436	4.40305	4.71152	4.84479	4.75384	4.10234	4.34909	4.95649	4.90087	4.61855	4.67914	4.96171	5.6967	4.80884	6.19105	4.66776	4.69966	5.7793	4.66556	5.61683	4.76693	4.40093	4.65486	5.03353	4.1917	4.67673	5.94359
CD81	8.44822	9.17759	8.75847	9.02727	9.45317	10.5106	8.77766	8.37419	10.9877	8.43498	10.4575	8.47694	8.82591	9.20309	8.85732	8.52108	8.4343	8.4342	8.88002	9.38004	8.39428	8.99098	8.93651	8.95277	8.94349	8.88346	9.40251	9.14244	9.65922	8.69513	8.32362	8.48711	8.79994	8.9305	10.3098	8.62711	10.0897	8.79858	9.16255	10.8569	8.67968	10.6168	9.13565	9.0197	9.14695	8.63372	9.03125	8.84296	10.7132
KIR3DS1	4.91818	5.23228	4.76888	4.98876	4.5017	7.20883	4.66912	4.40249	6.75095	4.6507	7.213	5.12093	4.34692	5.16668	5.18696	5.00768	5.27365	5.02026	4.98928	4.60707	4.91987	4.79429	5.05436	4.40305	4.71152	4.84479	4.75384	4.10234	6.02986	4.95649	4.90087	5.21979	4.67914	4.96171	9.03852	5.27386	9.49222	4.66776	4.69966	8.21841	4.66556	8.74611	5.4952	4.40093	4.65486	5.03353	4.1917	4.67673	6.83975
IL5	4.91818	5.00551	4.76888	4.98876	4.5017	4.57023	4.66912	4.40249	4.20188	4.6507	4.72574	5.12093	4.34692	5.16668	5.18696	4.80274	5.27365	4.93512	4.98928	4.60707	4.91987	4.79429	5.05436	4.40305	4.71152	4.84479	4.75384	4.10234	5.90433	4.95649	4.90087	4.61855	4.67914	4.96171	4.91909	4.80884	5.5212	4.66776	4.69966	4.42073	4.66556	4.52372	4.76693	4.40093	4.65486	5.03353	4.1917	4.67673	4.86112
PTGER2	4.91818	5.00551	4.76888	4.98876	4.92961	7.68065	4.66912	4.40249	7.8923	4.6507	6.90707	5.12093	4.34692	5.16668	5.18696	4.80274	5.27365	4.93512	4.98928	5.46972	4.91987	4.79429	5.05436	4.40305	4.71152	4.84479	4.75384	4.10234	6.4449	5.01475	4.90087	4.61855	4.67914	4.96171	7.43366	4.80884	7.56956	4.66776	4.69966	7.4539	4.66556	7.09256	4.76693	4.40093	6.2841	5.03353	5.6456	4.67673	8.77929
CD48	11.3205	11.5499	11.7066	11.521	11.7594	11.4467	11.7773	11.5811	12.65	11.1651	11.5681	11.1181	11.4635	11.8029	11.5318	11.4544	11.6624	11.3254	12.004	11.2632	11.7802	11.9846	11.8136	12.0513	11.5453	11.7755	12.0061	11.4934	12.8884	11.1366	11.3808	11.6955	11.796	11.7108	12.267	11.2628	12.4812	11.5667	11.3678	12.5642	11.6852	12.0551	12.145	11.3598	11.5925	11.7643	12.0987	11.6527	12.4189
MEF2D	5.47607	5.98971	5.74493	5.89229	5.43981	5.57023	5.71237	5.5413	7.08975	5.8048	5.61882	5.43416	6.18071	5.94353	5.8912	5.93612	5.27365	5.81246	5.55398	5.46972	5.60536	6.0859	6.12915	6.30113	5.99538	5.9722	5.72239	6.15821	6.57418	5.75171	5.64215	6.11287	5.69666	6.02945	6.50405	5.77429	6.19105	6.32526	5.64597	5.98575	6.41566	6.49947	6.38501	6.59304	5.96923	5.60531	5.44629	6.33481	6.13121
TNFSF14	5.97357	5.42493	5.10447	6.19185	6.07504	6.48584	5.00188	5.20426	6.30734	5.66892	5.80103	5.12093	4.34692	6.35162	5.84938	5.66819	5.27365	5.5696	4.98928	4.60707	5.75736	6.00184	5.71411	5.30113	4.71152	5.64205	5.58489	5.2785	6.02986	4.95649	4.90087	5.97315	5.50401	6.21387	7.21327	5.27386	6.73419	4.66776	5.8336	6.53829	5.91119	6.78675	7.10817	5.31293	5.89708	5.03353	5.27637	4.67673	7.77366
CD58	9.2416	9.03472	9.56968	9.26439	9.1981	8.88229	9.43322	9.22312	9.8971	8.95112	9.2084	8.80856	9.19323	9.05045	9.29719	9.55332	9.08274	9.14652	9.04675	9.10116	9.38963	9.90101	9.38598	9.62501	9.41433	9.67012	9.44287	8.92005	9.36376	8.71519	8.93937	9.52095	9.30028	8.92757	9.36912	9.00642	8.98658	8.89996	9.00743	9.20814	9.22976	9.74095	9.57766	9.08753	8.99106	9.14024	9.62509	9.10035	9.71324
C1S	4.91818	5.00551	4.76888	4.98876	4.5017	4.57023	4.66912	4.40249	4.20188	4.6507	4.50335	5.12093	4.34692	5.16668	5.18696	4.80274	5.27365	4.93512	4.98928	4.60707	4.91987	4.79429	5.05436	4.40305	4.71152	4.84479	4.75384	4.10234	4.34909	4.95649	4.90087	4.61855	4.67914	4.96171	4.12597	4.80884	4.31028	4.66776	4.69966	5.93684	4.66556	3.88692	4.76693	4.40093	4.65486	5.03353	4.1917	4.67673	5.16598
CD247	7.95846	7.90605	8.24101	7.47726	7.15201	6.41458	7.51207	7.60019	7.12292	8.15243	5.72574	8.11391	8.49591	7.13791	7.91674	7.86726	7.84434	8.08897	8.47998	7.17016	8.01437	8.34667	7.41673	8.06896	7.56985	7.38313	6.65528	8.32813	6.83721	8.04223	7.38184	8.16196	7.31137	7.75984	5.8487	8.2606	6.30969	8.37059	7.90231	6.03305	7.78871	6.07626	6.88347	8.25511	7.39304	7.73834	6.59829	7.20051	6.60655
LILRB2	7.26143	6.74686	7.88119	7.04983	7.71811	8.58653	8.22895	7.45618	9.13922	7.10385	8.46528	7.24913	7.33941	7.14998	6.69266	7.66081	7.64308	7.13844	7.67262	7.71765	7.68336	7.84983	7.41673	8.08036	7.94755	7.6108	9.35042	6.80457	7.80245	7.77919	7.05378	7.65274	7.76275	6.59976	9.35014	7.64423	9.19619	7.26253	6.40678	8.60242	7.27934	10.0986	7.64614	8.11438	8.35987	7.64573	8.98602	7.79716	10.3128
NFIL3	7.6703	8.75584	8.24583	7.86992	9.39895	9.40771	8.58319	7.35722	12.1831	7.15562	9.17105	7.8341	7.75444	8.02445	7.30881	8.2284	7.76717	7.37695	7.93249	8.71765	7.35191	8.06534	7.47632	9.01054	8.77103	8.30067	11.474	8.2857	11.4783	7.82738	7.62848	8.1349	9.56394	8.48091	10.7556	7.84112	11.0304	7.83676	7.20397	10.8942	9.2026	9.34134	9.21831	7.17233	10.4174	7.35534	9.72758	9.94362	10.5168
ABCB1	4.91818	5.16189	5.01701	5.26224	5.05514	4.96878	4.95748	5.12626	5.98541	5.00149	4.67327	5.12093	5.21387	5.16668	5.28548	5.00768	5.27365	4.93512	4.98928	4.60707	4.91987	5.16534	5.05436	4.89903	4.71152	4.84479	4.75384	5.02696	5.96846	4.95649	5.04351	4.79094	5.82594	4.96171	5.48097	4.80884	5.91975	5.57803	5.93548	6.28831	5.34291	5.66122	5.45213	4.40093	5.46966	5.03353	5.49876	4.67673	3.97551
IL11RA	5.21642	5.42493	6.16675	5.26224	4.69257	7.68065	5.12741	5.12626	6.66348	5.49899	6.87258	5.74537	5.66133	5.70252	5.54328	5.98422	6.01426	5.52069	6.20606	5.56926	5.32296	5.56743	5.32709	4.67664	5.89808	4.84479	4.75384	5.63464	6.4449	5.3732	5.79687	5.87186	5.69666	5.41132	7.99438	5.84704	8.01596	5.89996	5.90231	7.36426	6.18536	7.60551	5.834	6.22804	5.56587	5.81831	5.77887	5.97224	8.38837
TNFSF10	6.88686	6.3157	6.81142	6.86992	8.61314	9.16879	7.91168	6.43207	10.0729	7.02951	8.31499	6.62179	5.9639	7.7107	6.47616	6.88637	6.97362	7.09734	6.53322	8.70129	6.48855	6.54781	7.42539	6.56741	8.21329	6.87032	10.2326	6.56538	8.81994	7.98201	6.74712	7.06778	8.97743	6.49285	9.51829	7.34257	11.5804	5.85814	6.38294	10.5239	6.4622	9.07216	8.06595	6.41246	9.6588	6.96606	10.7317	9.01288	9.73366
CCL24	4.91818	5.00551	4.87499	5.07938	4.5017	4.63436	4.66912	5.00073	6.36392	4.6507	4.48415	5.12093	5.21387	5.16668	5.18696	5.00768	5.27365	4.93512	4.98928	5.46972	4.91987	5.26487	5.05436	4.40305	4.71152	4.84479	4.75384	4.88257	5.90433	4.95649	5.19963	5.1349	5.69666	4.96171	5.22721	4.80884	5.96866	5.47111	5.43024	5.98575	5.34291	5.52372	5.72966	4.8275	5.7816	5.5382	5.08372	5.59785	5.23309
IL1RAP	9.50547	9.85119	9.95512	9.11072	10.3781	11.3012	9.36475	8.43207	13.3526	9.19635	10.9594	8.67928	9.38744	11.1081	8.64761	9.95132	8.30922	9.30656	8.68679	9.78131	8.94006	10.0842	9.31781	9.34907	10.9117	10.2201	12.0676	8.87305	13.2699	8.83787	8.50295	10.0476	11.0276	10.3025	11.6879	9.29352	12.2442	9.91278	8.62579	12.5697	10.4779	11.214	11.5945	9.05092	11.9086	8.92396	12.245	9.67268	11.9379
CD99	9.14883	8.80286	9.76855	9.87274	8.8365	8.8987	9.26354	9.31169	9.41837	9.21933	8.28471	9.30499	9.86297	8.58294	9.77035	9.77629	9.32277	9.20187	9.02461	10.253	9.0472	10.2558	9.11047	9.18708	9.68614	9.10896	8.64954	9.75099	9.81122	9.07807	9.21801	9.66982	10.3797	8.75984	8.54914	9.42013	9.26634	10.1457	9.78211	8.56267	9.83365	8.49947	8.68386	9.86839	9.07111	9.16269	9.63098	9.27341	9.19151
TLR5	6.47607	5.36353	7.02823	7.13671	6.81596	7.66539	6.72567	6.16579	9.40495	6.32907	6.96278	5.67928	6.2463	7.68603	6.79534	6.92384	6.01426	6.02026	5.94826	8.08022	5.92086	6.91257	6.17097	6.55111	8.46617	6.37075	8.83787	6.49262	9.79362	6.2992	6.10406	6.92339	8.29657	6.07252	8.56569	6.16423	8.74125	6.62865	6.54214	7.41871	7.42744	7.94775	7.48455	5.57596	8.70444	6.33571	9.36029	7.89824	8.46016
SOCS3	5.71053	5.88436	6.03938	6.01967	8.09467	8.85563	6.99091	5.20426	10.8607	5.8048	8.30209	5.61001	5.75444	7.82052	5.28548	6.07585	5.27365	5.79199	4.98928	8.06325	5.1579	6.71553	5.68554	6.17914	8.22001	5.55716	9.48535	6.38953	11.5984	6.34405	5.43779	6.02124	8.92548	6.37737	9.02263	6.08623	9.79308	6.70141	6.25741	9.22351	7.22639	8.81159	8.29648	6.31293	10.0975	5.43128	9.96753	7.47232	9.03105
CLEC6A	4.91818	5.59485	5.63172	5.29619	6.0145	5.89216	5.12741	4.86323	5.98541	4.6507	5.61882	5.4072	5.3983	6.10107	5.18696	5.54533	5.54478	5.05503	4.98928	5.61656	4.91987	4.79429	5.05436	4.94966	4.71152	5.41966	5.80728	4.10234	6.80245	4.95649	5.49919	5.51677	5.82594	6.00742	6.9862	4.80884	7.50471	5.67756	5.2834	7.20814	5.69438	6.70429	6.40773	4.991	5.74096	5.70047	5.77887	5.65031	7.13121
HMGN1	9.51892	9.39455	9.76352	9.72167	9.12362	9.82504	9.12991	9.59115	10.3465	8.94378	10.0098	9.46881	9.35807	9.46709	9.59323	9.77458	9.59029	9.50506	9.18292	9.38347	9.39891	9.83776	9.34318	9.62501	9.37269	9.45821	8.9164	9.03978	10.0411	8.88416	9.59019	10.0242	9.46484	9.77459	9.42159	9.47855	9.93521	8.93558	9.3121	10.4647	9.28259	9.70959	9.54473	9.12322	9.74867	9.27	9.71654	9.07178	9.46016
CD79B	6.21642	6.34776	6.68943	6.66434	5.99374	6.57023	6.29733	6.75075	7.54613	6.16196	6.29342	6.67928	6.14676	6.50988	6.7392	6.57704	6.97362	6.69613	6.86764	6.30622	6.71342	6.83371	6.80987	6.66154	6.25318	6.77955	6.26296	6.54153	6.96846	6.23714	7.3405	6.31932	6.28162	7.21387	7.58205	6.48616	7.63162	6.77067	6.86836	7.34564	6.21285	7.48719	6.63655	7.13784	6.25553	6.9403	6.30611	6.45767	7.02159
FCGR1A	4.91818	5.00551	5.01701	4.98876	7.72442	9.77791	6.38375	4.60019	10.6522	4.6507	9.13755	5.12093	5.21387	9.14094	5.18696	4.91146	5.27365	4.93512	4.98928	7.18593	4.91987	4.79429	5.434	4.84657	7.37871	4.84479	9.94712	4.10234	10.2746	5.34405	5.08416	4.61855	8.45821	5.30698	9.42159	4.80884	10.8398	5.57803	4.69966	11.1476	5.61421	9.05562	8.40209	4.40093	8.45088	5.50343	9.51795	6.84296	9.53188
GRB2	8.44172	8.30349	8.74152	8.50655	9.12839	9.02966	8.79983	8.3826	10.6465	8.26276	8.82828	8.39695	8.39107	9.07598	8.36554	8.80167	8.33084	8.50191	8.39048	8.95239	8.63707	9.07566	8.72819	9.04296	9.12646	8.63171	9.41609	8.46119	9.65922	8.58732	8.47265	8.75939	9.32965	8.63611	9.52395	8.5993	9.6048	8.49177	8.21751	9.75481	8.8858	9.66668	9.36193	8.37347	9.58896	8.59709	9.59829	9.23956	9.4283
CCR4	8.39983	6.99984	7.33894	7.59785	6.49993	5.66539	6.86437	7.05437	7.18705	8.22993	5.20379	7.8034	7.2463	6.73494	7.56282	7.71169	7.34684	8.0721	6.83409	7.43055	6.58924	7.92022	7.55739	6.63084	7.40256	7.22701	5.678	7.18923	7.57418	7.77919	7.28927	7.83197	7.43812	6.76641	5.43366	8.28699	7.12786	7.35564	7.49842	6.12325	7.11428	6.23154	6.4952	7.43157	7.56587	7.13457	7.32076	6.62432	6.58102
NOD2	7.06668	6.81724	6.98279	7.41682	7.92414	8.17149	7.77126	6.76369	8.77201	6.82891	8.06813	6.53726	6.61242	7.93658	7.17977	7.25315	6.59923	6.67394	6.97928	7.63965	7.10219	7.74169	7.434	7.80593	7.5271	6.85262	8.74946	6.63464	8.76682	7.2992	6.69559	7.35729	8.00044	7.27046	8.76518	7.00377	8.95051	7.2301	7.2834	8.24878	7.47361	8.58837	8.34437	6.991	8.31904	7.2227	8.58622	8.37434	8.22487
IL6ST	8.3003	8.79997	8.14629	8.17371	8.47393	9.11361	7.94617	8.1755	9.63503	8.25685	8.49581	8.49946	7.63709	8.82805	8.01931	8.19303	8.07316	8.52999	7.79973	8.1218	7.51439	7.64338	7.68554	7.77116	8.21329	8.04415	8.38536	8.46753	8.99949	8.4367	8.0741	8.10173	7.70788	8.91283	8.64051	8.66114	8.07299	7.67756	8.09076	9.74063	7.57239	8.75638	9.00019	7.93853	8.51255	7.78974	8.27637	8.10035	8.69847
BAX	7.92155	7.75883	8.32535	7.79474	7.79211	8.95315	8.05024	7.96196	8.53385	7.8487	8.83127	8.10973	7.63709	7.70252	7.85995	8.2284	8.02093	7.93417	8.31951	7.56926	7.8617	8.33526	7.99005	8.27159	8.31102	8.00462	7.94478	7.92926	7.7303	8.13449	8.01752	8.25541	7.5793	7.76641	9.05425	8.11106	8.14923	8.05608	7.87693	8.40977	7.90278	9.35492	7.80861	8.16093	8.41258	8.15151	8.32803	8.07178	10.0025
ROCK2	6.58238	6.86233	6.93587	6.85861	7.64677	7.64218	7.27037	6.7377	8.79277	6.56747	7.65309	7.06298	7.14676	7.40296	6.68078	6.92384	6.91759	6.66271	6.85096	7.96615	6.47106	7.32377	6.53354	6.83315	8.01871	6.93903	8.85292	6.92005	9.00714	7.27624	6.88002	6.98532	7.87657	6.72652	7.92765	6.7618	8.76221	7.14571	7.01521	8.34564	6.89432	8.14039	7.38501	6.78356	8.61168	7.07662	8.99974	7.83164	8.40302
ISG20	7.80814	7.27459	7.17688	7.46984	9.79211	10.1442	9.69388	7.27826	11.4676	7.8048	9.83127	7.51217	6.88373	8.23744	7.37663	7.2823	7.41925	7.69061	7.28268	9.88637	6.89487	6.97269	7.88089	7.27159	9.88756	7.60023	10.8303	7.78439	10.5029	9.59662	7.19963	7.35729	10.7287	7.56248	10.7203	8.93033	11.2528	6.92042	7.25741	11.1301	7.12878	10.0986	8.3561	7.22804	10.6423	7.28543	10.7262	10.3685	10.5778
CCL7	4.91818	5.00551	5.22646	5.11785	4.92961	7.5784	5.08677	5.12626	7.49637	4.6507	6.04767	5.12093	5.278	5.16668	5.18696	5.37541	5.27365	4.93512	5.46909	5.9103	4.91987	5.31218	5.05436	4.61524	5.71975	4.84479	6.90682	4.10234	6.83721	4.95649	4.90087	5.29996	4.67914	4.96171	8.64571	4.80884	9.08413	4.66776	4.69966	8.26868	5.29228	7.48719	5.26572	4.40093	5.85961	5.03353	7.01333	6.16489	7.88219
MIF	6.52611	6.86233	6.61692	6.39349	6.48513	8.1108	6.29733	6.93362	7.85331	7.15562	7.58372	7.21844	7.02123	6.79768	6.82801	6.83484	7.11736	6.7071	7.12514	6.70676	6.50582	6.89714	6.91205	6.91186	6.86414	6.70259	6.72239	7.1265	6.7303	6.95816	6.73441	6.92339	6.78412	6.64327	7.95304	6.79895	6.84313	6.85814	6.62579	7.58665	6.87724	7.80665	6.89959	7.10251	6.95153	7.07662	6.79993	7.18281	9.51175
JAK1	9.88845	9.86233	10.1932	9.75867	10.1104	9.43047	10.0738	9.81897	10.5942	9.62484	9.3214	9.80727	9.8991	10.0633	9.6763	10.0869	9.76717	9.83013	9.79538	9.82727	10.0174	10.2783	9.96501	10.2999	10.215	10.1728	9.87767	9.48951	10.2619	9.78463	9.8958	10.1156	10.4927	10.0831	9.80986	10.1355	9.69112	9.82052	9.57408	9.55459	9.9464	9.74869	10.2858	9.40523	10.1195	9.88397	10.1135	10.1214	9.59384
IL29	4.91818	5.62132	5.63172	5.82412	5.76786	6.3962	5.79037	5.4799	6.30734	4.6507	6.02691	5.48663	6.18071	5.76665	5.66881	5.88637	5.87409	5.08897	5.63415	6.44373	5.28343	5.71553	5.62665	5.44923	5.71975	5.37075	6.20156	5.67904	7.39909	5.5367	5.49919	6.19903	7.01858	5.50862	7.25469	5.27386	7.61635	5.85814	6.38294	7.24878	5.94436	7.26069	6.08016	5.43157	5.61168	6.14588	5.93933	6.05241	6.38837
IL33	4.91818	5.00551	4.76888	4.98876	4.5017	4.69576	4.66912	4.40249	4.20188	4.6507	4.48415	5.12093	4.34692	5.16668	5.18696	4.80274	5.27365	4.93512	4.98928	5.46972	4.91987	4.79429	5.05436	4.40305	4.71152	4.84479	4.75384	4.10234	6.14534	4.95649	4.90087	4.61855	5.82594	4.96171	5.11173	4.80884	5.70562	4.66776	4.69966	5.53829	4.66556	3.88692	4.76693	4.40093	5.46966	5.03353	4.1917	4.67673	4.86112
LILRA2	8.7391	8.42117	8.82114	8.82121	9.40485	10.5244	9.59773	9.14121	11.1311	8.40588	10.1303	8.21844	7.92437	9.19729	8.50339	8.93918	9.15722	8.36661	8.76899	8.87182	9.1331	8.87368	8.21661	9.17914	9.04925	8.32655	10.8008	8.03552	10.1102	8.82474	9.23164	9.0505	9.23969	8.95084	12.005	8.55293	10.6765	8.53886	8.41856	10.8862	8.89007	11.7589	9.88549	9.01337	10.2153	9.14024	10.4891	10.0742	11.6238
CD27	7.79119	7.75285	7.89965	7.49928	6.82773	5.75465	7.46528	8.00073	7.02104	7.77201	5.44195	8.01019	8.30134	7.10107	7.55633	7.66081	7.87409	7.83763	7.90043	7.08863	7.75736	7.93541	8.04169	7.59153	7.02641	7.74159	6.13743	7.63464	7.11732	7.36597	7.83309	7.80475	7.38316	7.4849	5.81217	7.88209	6.30969	7.9406	7.72397	6.20814	7.43912	5.61683	6.69314	7.71503	7.15084	8.0224	6.15084	7.36652	5.58102
ICAM2	8.6777	8.70105	8.3524	8.83282	8.813	8.42821	8.63344	8.34435	8.58235	8.31206	7.76387	8.45735	8.43392	8.81295	8.89378	8.40221	8.24237	8.4375	7.86764	8.72846	8.09079	8.98003	8.47632	8.42707	8.68127	8.75594	8.678	8.57716	8.29039	8.18055	8.51414	8.61798	9.40056	8.98506	8.57116	8.50502	8.88831	8.51214	8.68062	8.24878	8.53477	8.14039	8.8298	8.34855	8.53649	8.38906	8.71377	8.5572	8.83436
IRAK2	5.11107	6.17981	6.26493	5.72791	6.11404	6.33962	6.02357	5.60019	8.3914	5.02951	6.41024	5.76674	5.79884	5.76665	5.91167	6.00768	6.04074	5.59345	5.85096	6.39029	5.36143	5.81741	5.50112	5.55111	6.62157	6.15662	7.47241	5.21961	8.30288	5.79543	5.55809	5.94848	6.55464	5.96234	7.49256	5.72366	8.36555	6.16299	6.38294	7.86022	5.73285	7.47481	6.02244	5.93853	6.54242	5.90077	7.27637	6.16489	8.18305
IFNAR1	7.2416	7.25782	7.67522	7.80656	7.93507	7.02966	7.29733	7.15601	9.16333	7.04331	6.9952	6.79822	6.79884	8.54687	7.54328	7.66819	6.9873	7.17841	7.03941	7.95699	7.51439	7.8418	7.17097	7.46672	8.42602	7.25424	8.17784	7.11038	9.51099	7.05127	7.00169	7.8116	8.22022	7.58497	7.64571	7.16423	8.38369	7.79304	7.38294	8.37348	7.72333	7.55934	8.48455	7.12616	8.15857	7.30575	8.77887	7.44287	7.92341
TNFRSF13C	4.91818	5.36353	5.01701	5.48463	5.24277	6.57023	5.08677	5.20426	6.30734	4.6507	6.18517	5.46064	5.79884	5.56502	5.54328	5.57704	5.27365	5.12214	5.4247	5.36281	5.11351	4.79429	5.17097	5.2616	4.71152	5.55716	4.75384	5.49262	6.08875	4.95649	5.91423	5.26043	5.74105	5.98506	7.28166	4.80884	7.32855	6.2301	5.8336	6.83374	5.73285	7.23154	4.76693	5.91157	4.65486	5.73084	5.39184	4.67673	6.32825
TGFB2	4.91818	5.36353	5.10447	5.45489	5.37707	4.81124	5.41691	5.0438	6.57038	4.6507	4.77636	5.12093	5.61242	5.66936	5.18696	5.00768	5.27365	4.98464	4.98928	5.56926	4.91987	5.40237	5.05436	5.51794	5.51621	5.41966	5.84792	4.10234	6.25225	4.95649	5.08416	5.58236	5.90611	5.34261	5.57116	5.00377	6.23169	4.66776	5.17649	6.12325	5.23981	5.31727	5.65566	5.09054	4.65486	5.50343	5.08372	4.67673	5.58102
MAPKAPK2	8.01796	7.88436	8.56004	8.11785	8.43211	9.00562	8.14236	7.8752	9.62349	7.7637	9.24706	7.62179	7.82053	8.50048	7.82261	8.37541	7.91759	7.85746	8.12514	7.92915	8.13587	8.56255	8.13444	8.52213	8.59076	8.19927	8.74946	7.76393	9.39326	7.88416	7.99638	8.47852	8.70788	8.26118	9.31793	8.08623	9.44114	8.23828	7.80696	9.21841	8.52932	9.78425	8.88751	8.44574	8.92002	8.09425	9.07078	8.56406	9.86642
CCL26	4.91818	5.00551	4.76888	4.98876	4.5017	4.12887	4.66912	4.40249	4.20188	4.6507	4.48415	5.12093	4.34692	5.16668	5.18696	4.80274	5.27365	4.93512	4.98928	4.60707	4.91987	4.79429	5.05436	4.40305	4.71152	4.84479	4.75384	4.10234	4.34909	4.95649	4.90087	4.61855	5.45154	4.96171	5.17063	4.80884	6.06177	4.66776	4.69966	5.7793	4.66556	5.00915	4.76693	4.40093	4.65486	5.03353	4.1917	4.67673	4.77366
CD3E	9.433	9.5848	9.33216	8.72167	8.68612	7.80429	8.74212	9.33571	8.17128	9.4493	7.58372	9.72094	8.80429	8.6397	9.13043	9.20576	9.57226	9.67114	9.1286	8.61656	8.93687	8.95789	9.0161	8.81278	8.87696	9.32012	7.95412	9.48013	7.85429	9.54952	9.33419	9.1859	8.29657	9.48091	7.58205	9.8262	7.47116	9.12823	8.8939	7.38264	8.29871	7.54757	8.63655	9.71892	8.96483	8.92396	8.45295	8.98762	7.77366
CSF3R	9.28221	9.67917	9.56775	9.53526	10.4127	10.6615	9.83707	8.45219	12.9472	9.07053	10.508	8.59516	9.28972	10.5492	9.00271	9.67003	8.12356	9.22876	8.95608	9.82224	9.24536	10.1212	9.23644	9.8449	10.2711	9.79354	11.9617	9.264	12.3778	9.2954	8.33208	9.50624	11.0276	9.99628	11.5197	9.11106	12.1379	9.51214	8.93137	12.0971	10.2548	11.0091	11.1012	10.4794	11.4126	8.99763	11.5595	9.72866	11.6371
CXCL5	4.91818	5.00551	4.82436	4.98876	4.5017	8.0708	4.66912	4.40249	7.36392	4.6507	7.37781	5.12093	5.14676	5.16668	5.18696	4.80274	5.27365	4.93512	4.98928	4.60707	4.91987	4.79429	5.05436	4.55111	4.71152	4.84479	4.75384	4.10234	6.30288	4.95649	4.90087	4.61855	4.67914	4.96171	8.74594	4.80884	8.47962	4.66776	5.23093	7.99772	4.66556	8.28926	4.76693	4.40093	5.36657	5.03353	4.1917	4.67673	8.97823
PTGFR	4.91818	5.00551	4.87499	4.98876	4.5017	4.91815	5.00188	5.00073	5.98541	4.6507	5.16631	5.12093	5.33941	5.16668	5.18696	5.33888	5.75123	4.93512	4.98928	5.94777	4.91987	4.79429	5.05436	4.40305	4.71152	4.84479	4.75384	4.10234	6.61482	4.95649	4.90087	4.99739	5.82594	4.96171	5.9862	5.08623	6.61635	4.66776	5.93548	6.20814	4.66556	5.70429	4.76693	4.40093	5.69914	5.19028	5.27637	4.67673	5.68055
FCER1G	9.83982	9.57637	10.0435	9.71228	10.2861	12.163	10.1424	9.41166	12.817	9.66557	12.0483	9.45242	9.45835	9.87972	9.46928	10.035	9.61912	9.47489	9.95608	9.87426	9.90955	10.3324	9.87774	10.1725	10.2646	9.87032	11.6198	9.38619	12.0119	9.76277	9.31084	10.1212	10.3638	9.3838	12.0928	9.56915	11.5586	9.63176	9.47323	12.5586	10.223	13.1523	10.5136	10.4363	11.0327	9.98509	11.2632	10.0229	13.0734
PTGIR	4.91818	5.19752	5.37456	5.57036	5.64011	6.1108	5.88822	5.3826	6.30734	5.59585	5.87258	5.3517	5.3983	5.16668	5.78429	5.66819	5.81396	4.93512	5.51216	6.08863	4.91987	5.7503	5.36362	5.70639	5.51621	5.51277	5.88745	5.54153	6.7303	5.85863	5.74712	5.44805	5.78412	5.30698	6.93616	5.30862	7.45408	5.57803	5.47605	6.86022	5.57239	7.00915	5.9927	5.50557	6.03794	5.70047	6.44629	6.05241	6.23309
ATF2	7.31461	7.5404	7.70351	7.49928	7.76174	7.46835	7.57219	7.62876	8.48366	7.53364	7.56224	7.37972	7.30903	7.87972	7.5821	7.71169	7.79853	7.66271	7.67262	7.88154	7.83461	8.11287	7.89344	7.66154	7.79375	7.9885	7.48535	7.54153	8.50018	7.49753	7.62848	7.78399	7.94458	7.84304	7.82139	7.62367	7.12786	7.59085	7.52044	7.73707	7.77955	7.92061	8.31463	7.34352	7.65607	7.57215	7.97681	7.67585	8.00248
MAFF	4.91818	5.00551	5.18693	5.42451	4.83941	6.32025	4.91168	4.91053	7.02104	4.6507	6.32777	5.12093	5.61242	5.16668	5.18696	5.47974	5.27365	4.93512	5.55398	5.83229	4.91987	4.79429	5.36362	5.09168	6.05678	5.46696	6.29271	4.10234	6.61482	5.15561	4.90087	5.26043	6.05421	4.96171	6.95304	5.40816	7.32855	5.67756	4.69966	6.88621	5.39182	6.26069	5.65566	5.50557	6.63405	5.03353	5.59829	5.5434	6.92341
FYN	8.31698	8.31164	8.39639	8.12259	8.13788	6.69576	8.28391	8.52619	7.79277	8.53119	6.8132	8.76409	8.1723	7.87245	8.23359	8.2823	8.67723	8.67114	8.49078	7.99328	8.21154	8.10617	8.27531	8.20542	8.17226	8.38313	8.92593	8.37611	7.76682	8.45386	8.45339	8.45682	7.97278	8.3249	7.46929	9.04043	7.5375	8.55203	8.22424	7.61802	7.97678	7.00915	7.88347	8.38332	8.46966	8.39381	8.43287	8.2859	6.72786
ATG12	7.78435	7.91678	7.96537	7.86992	8.23837	8.35397	7.76484	7.72452	9.24091	7.72567	8.60488	7.79302	7.63709	8.14998	7.83873	7.71169	8.04728	7.73952	7.83409	7.73918	7.82087	8.27087	7.55739	7.8861	8.07173	7.6108	8.4789	7.85381	8.77581	7.89425	7.64215	7.97315	8.0717	7.98506	8.52112	7.7618	8.50471	7.8041	7.95986	9.05614	7.85125	8.73577	8.2781	7.49653	8.35987	7.95324	8.42611	8.05241	8.98312
TNFRSF11A	4.91818	5.00551	4.76888	4.98876	4.5017	5.60265	4.76484	4.40249	4.20188	4.6507	5.24031	5.12093	4.34692	5.16668	5.18696	4.80274	5.27365	4.93512	4.98928	4.60707	4.91987	4.79429	5.05436	4.40305	4.71152	4.84479	4.75384	4.10234	4.34909	4.95649	4.90087	4.61855	4.67914	4.96171	6.22721	4.80884	6.34717	4.66776	4.69966	6.07886	4.66556	6.10868	4.76693	4.40093	4.65486	5.03353	5.27637	4.67673	5.72786
DDX58	7.30985	6.51239	7.23618	7.22748	11.2026	11.3694	11.4448	7.18515	12.9798	8.05699	10.5024	7.25671	7.23018	8.22037	6.77315	7.10876	7.04074	6.95733	7.17958	11.6833	7.11351	7.22835	8.10778	8.41811	12.0013	7.26766	13.0281	6.9922	12.7702	10.441	6.82112	6.99739	12.3845	6.37737	11.691	10.2881	12.9344	7.30983	6.79798	12.3071	7.54021	11.6721	8.20863	6.16093	12.1581	7.84632	12.4866	11.9671	11.5311
NFATC3	8.42423	8.86787	8.84356	8.38562	7.96203	7.02966	8.48496	8.86922	7.79277	8.54824	6.83725	8.82902	8.67926	8.16195	8.71611	8.50469	8.78294	8.80737	8.72848	8.097	8.84822	8.97637	8.70347	8.71739	8.15832	8.63689	7.77603	8.57128	7.85429	8.35505	8.63533	8.82182	8.22804	8.63969	7.08136	8.69109	7.03905	8.82596	8.50947	7.07886	8.09226	7.23154	7.68386	8.62659	7.79159	8.7043	7.53689	8.17388	7.1487
TNFSF15	4.91818	5.00551	4.76888	4.98876	4.83941	5.15519	4.95748	4.5413	6.24845	4.6507	4.48415	5.12093	4.34692	5.16668	5.18696	5.18276	5.27365	4.93512	4.98928	4.60707	4.91987	5.56743	5.05436	4.40305	4.71152	4.84479	4.75384	4.10234	6.30288	4.95649	4.90087	4.61855	5.45154	4.96171	5.48097	4.80884	6.23169	4.66776	4.69966	4.42073	4.66556	5.52372	4.76693	4.40093	5.74096	5.23334	5.01333	4.67673	6.19993
NFATC1	6.42423	6.48382	6.37456	6.48463	6.58566	6.26055	6.20541	6.0438	7.21807	6.22388	6.22216	6.44746	6.42687	7.07598	6.28548	6.56127	6.38866	6.29206	6.4247	6.15422	6.50582	6.38035	6.21161	6.3205	6.3298	6.81655	6.56064	5.9922	7.74868	6.49753	6.42203	6.43035	6.8464	6.99628	6.6353	6.65777	7.50471	6.4431	6.60533	7.03305	6.55101	6.74611	7.12198	7.26046	6.56587	6.31581	6.57405	6.30239	6.09559
FCAR	8.72131	8.88162	7.50082	9.12259	9.5541	10.6644	8.4413	7.83898	12.0461	8.49899	11.038	8.71545	8.33187	8.76273	7.77873	8.08139	7.65169	8.75547	7.45812	8.80192	7.0204	9.27087	8.88404	9.08886	8.71499	8.95571	10.8188	8.57128	11.4164	8.94123	8.30655	8.33368	9.89878	8.56248	11.6116	8.55293	11.0319	8.2301	8.44183	11.115	9.85125	11.6084	10.0784	7.66746	10.7461	7.61349	10.088	9.94362	12.3838
NOTCH2	9.03966	9.33981	9.28379	9.26867	9.9405	8.36346	8.80611	8.55253	10.1988	8.61447	8.59786	8.52163	8.49591	10.0617	8.90658	9.26293	8.42428	8.65139	8.36133	9.30622	8.81741	9.33812	9.11315	9.306	9.51894	9.38929	9.35748	8.84896	10.0706	8.84569	8.66912	9.20424	9.45154	9.70444	9.1634	8.92193	8.88194	9.08356	8.77526	9.24878	9.38277	9.39491	10.6013	9.18365	9.69116	8.80766	10.1135	9.35471	9.39571
CCL21	4.91818	5.00551	4.76888	5.03985	5.27754	5.19826	5.00188	5.20426	4.20188	4.6507	4.91838	5.12093	4.34692	5.16668	5.18696	5.30141	5.27365	4.93512	4.98928	5.87182	4.91987	4.79429	5.05436	5.17914	4.71152	4.84479	4.75384	4.10234	6.30288	5.01475	5.12368	4.61855	5.60355	4.96171	6.28166	4.8232	6.81665	5.77067	5.23093	6.66382	5.34291	6.07626	5.40773	5.04163	4.65486	5.03353	5.44629	5.79716	5.94359
TYK2	7.48453	7.38686	7.58686	7.82412	7.72442	7.38692	7.59411	7.40755	8.61768	7.27158	7.61187	7.3159	7.72023	7.91552	7.49663	7.82827	7.2706	7.40417	7.40198	7.23222	7.83461	7.91257	7.40801	8.14153	7.48305	7.32012	7.82775	7.52946	7.83721	7.09567	7.46113	7.83197	7.50401	7.90392	7.78416	7.15471	7.41932	7.72487	7.75217	8.15567	7.94436	8.04309	8.16262	8.01019	7.76143	7.67726	7.95819	7.86533	8.00248
GNLY	9.83652	9.43615	10.0142	10.3915	7.96737	8.63436	10.111	9.6978	8.98541	10.1055	8.46528	10.252	11.3004	8.32524	10.6027	9.45649	9.57905	10.0604	11.2256	9.76566	10.8558	10.9126	10.5867	10.859	8.76184	9.81655	10.0267	10.7691	9.9125	9.95093	9.07662	10.1793	10.2436	8.28884	8.93191	10.2695	8.23169	11.0091	11.0806	8.12325	10.3828	9.5855	8.29648	9.73823	9.66425	10.488	8.47931	8.62432	8.62541
IFIT1	8.81151	10.2355	10.0628	10.5833	14.1772	13.4887	13.4712	9.93362	15.26	10.0814	12.5654	9.29766	9.75726	11.0854	10.4684	8.92384	9.90323	7.83763	8.95997	13.9061	8.5523	9.63178	10.0002	9.63471	14.532	9.26766	15.1018	10.1063	15.1803	12.5296	9.14545	9.18061	14.7756	9.09096	14.295	12.4646	15.7612	9.4073	11.0104	14.8206	9.44782	13.4121	11.1981	8.22804	14.6986	9.48796	15.2349	14.4029	13.9971
ICAM1	4.91818	5.08789	5.14629	4.98876	5.90759	7.38692	6.14731	5.27826	7.66348	4.88366	6.90707	5.12093	5.61242	6.26546	5.18818	5.7259	5.65169	5.02026	5.88413	6.08863	4.91987	5.44544	5.05436	5.17914	5.86414	5.46696	6.82775	4.10234	6.99949	4.97727	5.43779	5.3759	6.25125	5.30698	8.38475	5.30862	8.69839	6.0186	5.33403	8.94304	5.18536	8.44338	5.76529	5.13784	6.22639	5.90077	5.86133	6.16489	8.63164
JAK2	9.19209	9.5053	9.61506	9.45676	11.2526	9.98578	10.3314	9.2624	11.7201	9.29773	9.90991	9.11599	9.16807	11.2132	9.00509	9.38215	9.24806	9.01806	9.31648	10.7904	9.34473	9.92213	9.72117	9.66343	11.1688	9.79586	11.7741	9.29285	12.5625	10.788	9.26074	9.40112	11.4448	9.58124	11.0659	9.92193	12.0057	9.53222	9.32154	11.3125	10.0357	10.0283	11.4007	9.04163	11.9375	9.40563	12.3687	11.0524	10.8357
PTGS2	8.39086	11.7107	8.61692	8.53526	11.3141	6.24008	8.84927	7.57105	11.7876	8.4402	5.61882	10.4761	10.4583	9.34375	7.79534	8.55332	9.03416	9.40922	8.08291	10.1074	6.5229	8.89326	7.53354	9.58153	10.1048	10.3233	11.4902	10.2567	12.8388	8.01936	8.58312	7.8116	11.7417	8.57751	9.20273	11.0031	9.98954	10.1457	7.8939	9.6525	11.3858	7.24619	10.5802	7.91836	12.8043	7.15711	9.41932	10.1237	6.29722
SLC2A1	4.91818	6.63438	5.94774	5.80066	6.24277	7.37759	6.38375	5.65678	6.98541	4.94378	5.82527	5.74537	6.11199	6.17383	5.7392	6.20323	5.75123	5.4176	6.15262	6.87182	5.60536	6.38035	5.92433	5.8196	5.42602	6.34566	6.88745	5.15821	7.98406	5.3732	5.52894	5.84539	6.90611	6.00742	6.65605	5.08623	8.14923	6.05608	5.99961	8.85364	5.87724	7.47481	6.02244	5.5412	5.74096	6.31581	5.33526	4.67673	7.68055
CXCL3	5.42423	6.52647	6.0831	6.36178	6.22507	6.69576	6.44934	5.57105	7.68585	5.57699	6.20379	5.46064	5.5618	5.97101	6.51681	6.18276	5.61693	5.83263	5.88413	6.39029	5.53977	5.40237	7.32709	5.94966	6.22671	7.81655	6.65528	6.72211	6.7303	5.5367	5.72159	6.11287	6.22022	5.93925	8.19211	5.79895	7.55362	4.66776	6.2834	7.40078	5.69438	6.80665	6.55748	5.76861	6.41903	6.02852	5.49876	6.33481	7.69252
NFKBIZ	8.09182	8.61804	8.34344	8.23187	8.89365	8.01167	8.43322	7.96196	10.2708	7.96569	8.00585	8.70164	8.12076	8.423	7.79534	8.517	8.19011	8.30656	8.16616	8.49526	7.90792	8.33526	8.24136	8.83315	8.62664	8.60023	9.15373	8.29285	8.81122	8.13022	8.37776	7.92339	8.53586	8.08309	9.40635	8.58164	9.92285	8.2053	8.26395	9.66006	8.74231	7.97438	8.59261	7.54997	9.39958	8.28031	8.89108	8.76182	8.69847
PECAM1	9.6933	9.60318	9.42215	9.28355	9.52546	10.1037	9.36687	9.46215	10.635	9.56747	10.4575	9.75743	9.18071	9.16195	9.345	9.39333	9.50493	9.62416	9.40198	8.84724	9.14141	9.54781	9.41455	9.24396	9.25318	9.32975	9.69481	9.02696	9.88784	9.80482	9.64385	9.40339	9.3369	9.78109	9.89309	9.76336	8.18071	9.32526	9.17301	9.41425	9.27934	10.8671	9.46573	9.28168	10.5216	9.62364	9.76822	9.27341	10.1487
LEF1	8.63653	8.98971	8.44746	7.86428	7.95131	7.40542	7.64398	8.13624	8.07288	8.71708	7.03732	9.15501	7.76567	8.05687	8.02401	8.47133	8.64739	9.01365	8.02461	7.30622	7.61335	7.85783	7.72117	7.89903	8.02641	8.00462	6.76546	8.35574	7.63472	8.78191	8.50295	8.32412	7.52955	8.97658	6.96971	9.13063	7.45408	8.0468	7.95178	7.34564	7.75171	7.39819	8.03709	8.78356	8.13524	8.06474	7.49876	8.05241	7.55502
OAS2	7.37046	6.43988	6.26493	6.49928	12.183	12.1041	11.8949	6.83898	14.1077	8.26276	11.4844	7.32313	6.5618	8.81295	6.59481	6.51291	6.61693	6.94811	7.20606	10.9933	6.58924	6.60591	7.28009	7.92457	11.4491	6.32012	13.5215	6.65701	13.683	11.1744	6.84497	6.49989	12.5465	6.428	12.7255	10.7172	13.5483	6.85814	6.6855	13.3982	7.00849	12.5154	9.54216	6.45043	12.904	7.36505	13.1164	11.7759	12.5958
FLT3LG	7.78435	7.67285	7.77856	7.42451	7.32816	7.4945	7.52734	7.81432	7.61768	7.78439	7.20379	7.94137	7.42687	7.67772	7.71029	8.00185	7.79076	7.99362	7.68208	7.08863	7.28343	7.4348	7.16063	7.41361	7.7756	7.77955	6.86782	7.66807	8.01475	8.05127	7.7846	7.79094	7.55464	8.05114	7.6248	8.11598	7.61635	7.86871	7.6156	7.20814	7.35529	7.41125	7.71152	8.53237	7.44457	7.54676	7.61027	7.66314	8.26551
IFNA2	4.91818	5.00551	4.76888	4.98876	4.5017	5.94369	4.91168	4.65678	6.57038	4.6507	5.44195	5.12093	4.34692	5.16668	5.18696	5.05348	5.27365	4.93512	4.98928	4.60707	4.91987	4.79429	5.05436	4.40305	4.71152	4.84479	5.678	4.10234	6.93675	4.95649	4.90087	4.61855	5.50401	4.96171	6.28166	4.80884	7.06177	5.52556	4.69966	6.50512	5.23981	6.42418	5.31463	4.40093	5.74096	5.03353	5.49876	4.67673	6.05906
IFNGR2	8.7792	8.64086	8.71049	9.44735	9.54521	10.2036	8.87635	7.94502	11.8607	8.30348	9.99653	8.01913	7.94427	9.82993	8.93435	8.75045	7.85183	8.56659	8.25759	9.45353	8.75736	9.24368	8.74559	8.97432	9.36056	8.77016	10.7441	8.92005	11.6701	8.87655	8.01226	8.86858	9.813	9.01572	11.29	8.43201	11.6765	8.62242	8.84673	11.3362	9.39182	10.6923	10.4218	9.14654	10.4572	8.67336	10.7534	9.09562	11.4021
LCK	7.81487	7.33182	7.97701	7.63811	6.91864	5.96878	7.27941	7.80808	7.24845	7.7885	6.41024	7.97849	7.64926	7.06327	7.76192	7.93612	8.04074	7.83263	7.86764	7.18593	7.84143	7.57715	7.69274	7.79904	7.50524	7.37075	6.94478	7.77419	7.19978	7.82738	7.83904	7.92339	7.28162	7.428	6.38475	8.12088	6.38369	7.89996	7.84237	6.63345	7.15735	6.07626	6.97759	8.12028	7.57746	7.78251	7.11767	7.23528	5.98312
HLA-B	11.8664	11.9566	12.213	12.8682	13.2406	12.3584	12.4408	12.6706	14.169	11.8805	12.3091	11.6331	12.6477	12.9894	12.6432	12.0446	12.7447	11.8676	11.9325	13.3543	11.8113	13.275	12.1561	12.39	12.8738	12.2266	13.3957	12.8541	14.563	12.4158	12.7101	12.1836	13.8886	12.5866	14.4826	12.163	13.6682	12.9832	12.6201	13.7016	13.5483	12.6364	13.6102	12.14	13.3373	11.8324	13.4758	13.9516	13.5214
TLR1	8.89481	9.19532	9.10976	8.91432	10.0438	9.35635	8.98539	8.61097	11.9161	8.63056	8.98447	8.05432	8.62481	10.4428	8.75627	8.89583	8.20774	8.63137	8.35543	9.22842	8.63314	9.66404	8.93043	8.93403	9.74794	9.0324	10.9212	8.36256	12.0261	8.69224	8.34468	8.93913	10.2064	9.65394	10.2615	8.55293	10.1492	9.12823	8.63592	10.2538	9.87724	9.72012	10.9833	8.49198	11.0619	8.55102	11.157	9.52244	9.95108
KLRB1	6.7946	7.04942	8.05593	7.86428	5.76786	5.1108	6.9	7.58569	6.30734	6.43759	5.75127	7.07159	8.80429	6.33055	8.209	7.53729	7.65169	6.96649	7.59462	7.10531	7.30333	8.5916	8.20156	7.22096	6.62157	7.75117	6.678	8.2857	7.32754	6.12166	7.28927	8.28526	6.76275	5.8677	6.01862	6.79895	6.64673	8.52556	8.6855	6.24878	7.70409	6.23154	5.86717	7.7761	5.85961	7.62162	6.30611	6.26922	5.68055
CFH	4.91818	5.00551	5.40932	5.54235	4.7432	5.1108	4.71237	4.65678	6.12292	4.88366	4.96278	5.17113	4.34692	5.16668	5.18696	5.33888	5.78294	4.98464	4.98928	5.41726	4.91987	5.52791	5.05436	4.94966	4.71152	4.84479	5.9634	4.10234	6.90433	4.95649	5.40608	5.41243	5.94458	4.96171	5.33413	4.80884	5.91975	4.66776	5.43024	6.40078	5.23981	5.78675	5.65566	4.991	5.82113	5.39381	6.01333	6.51538	5.02159
TAGAP	9.15414	9.51239	9.43697	8.85861	10.5977	8.74016	9.9419	9.05962	10.2257	9.12511	7.97908	8.94606	9.05365	10.6181	8.81449	9.58681	8.70646	9.31734	8.79973	10.1238	9.24279	9.63643	9.29908	10.0224	10.8534	9.62911	10.053	8.83432	10.7441	9.63623	9.3384	9.8735	10.9867	9.88894	9.66632	9.99979	10.0561	9.67456	8.84673	9.84704	10.2465	8.98315	10.3532	9.23349	10.2735	9.31581	10.6956	10.5692	9.36238
CD38	8.72131	8.96925	8.97701	8.30038	8.7432	10.1956	8.87932	8.50323	9.93961	8.63056	9.74493	8.8814	8.18071	8.69842	8.67181	8.82827	8.6081	8.83263	9.01715	8.84724	8.80001	8.35798	9.09426	8.80249	8.97565	9.00061	9.0617	8.85381	8.58445	8.95093	8.84201	8.96395	8.92548	8.8585	10.1814	9.1901	11.5775	8.40003	8.31525	10.8586	7.74231	9.46858	8.4792	8.6795	9.14306	8.96606	8.78416	9.218	10.2834
PYCARD	8.37729	7.87339	8.11504	8.12259	9.31148	9.99802	8.9	8.02242	10.8705	8.15243	10.0946	8.22617	7.88373	9.01458	8.17131	8.15151	8.19011	8.08897	8.55912	8.76566	8.38963	8.50773	8.01897	8.72104	9.05678	7.53514	10.2152	7.95657	9.73952	9.1598	7.99105	8.3526	9.03651	8.36876	10.1267	8.43987	9.52529	7.86871	7.95986	10.1795	8.43329	10.2334	9.34731	8.24973	10.3615	8.40327	10.1712	9.29829	10.3624
FXYD2	4.91818	5.00551	4.76888	4.98876	4.79211	5.15519	4.66912	4.4799	5.91141	4.6507	5.04767	5.12093	4.34692	5.16668	5.18696	5.14094	5.27365	4.93512	4.98928	4.60707	4.91987	4.79429	5.05436	4.61524	4.71152	4.84479	5.58489	4.10234	6.48929	4.95649	4.90087	4.89786	5.65085	4.96171	5.33413	4.80884	6.01596	4.66776	4.69966	6.24878	4.66556	5.86476	5.26572	4.40093	5.74096	5.03353	5.21497	4.67673	5.09559
EIF2A	8.21134	8.37912	8.45164	8.16913	8.05514	7.94369	8.16694	8.28277	8.20264	8.18705	7.63948	8.31227	7.99285	8.19146	8.27367	8.2433	8.35213	8.26633	8.39048	8.33479	7.9464	8.24672	8.19651	8.21062	8.35446	8.32012	7.88745	8.24197	8.07425	8.20102	8.21801	8.44365	7.92548	8.26583	7.28166	8.30862	8.18071	8.2301	8.20397	8.31726	7.83365	7.47481	7.834	8.09054	8.2483	8.23864	8.16714	8.14674	7.55502
BST2	8.59806	7.94325	8.29313	8.37772	10.1284	10.3141	9.96871	7.62167	11.4773	8.37073	9.9952	8.27547	7.98326	9.36203	8.25777	8.15677	7.85929	8.09734	8.36721	9.89119	8.13032	8.35233	9.12117	8.69531	10.0322	8.17098	11.5109	8.33508	11.7958	9.7751	7.60772	8.30967	10.6333	8.20906	10.1796	9.28481	11.1637	8.30983	8.48167	11.1095	8.22639	10.429	9.60986	8.02914	11.1075	8.36505	11.37	10.1761	10.8952
PDGFB	4.91818	5.00551	4.76888	4.98876	4.5017	5.50312	4.66912	4.41577	6.47084	4.6507	5.34465	5.12093	4.34692	5.16668	5.18696	4.80274	5.27365	4.93512	4.98928	4.60707	4.91987	4.79429	5.05436	4.40305	4.71152	4.84479	4.75384	4.10234	6.7303	4.95649	4.90087	4.61855	4.67914	4.96171	5.9862	4.80884	6.48803	4.66776	4.69966	6.20814	4.66556	5.97438	4.76693	4.64308	4.65486	5.03353	4.1917	4.67673	5.16598
ITGAL	9.02233	8.72566	9.22158	9.21422	9.43018	9.1108	9.15224	9.33137	9.30011	8.82092	8.84616	8.77994	8.9492	9.14396	9.03105	9.15414	9.17525	8.97786	9.27332	9.03306	9.1742	9.19087	9.48463	9.27159	9.10844	9.24069	9.53287	9.24567	9.55342	9.3587	9.22484	9.28033	9.35843	8.80204	9.73622	9.20171	8.58533	9.3481	9.32467	9.09008	9.32097	9.69097	9.62205	9.33085	9.59182	9.30827	9.76018	9.49042	9.83975
LTB4R2	4.91818	5.00551	4.76888	4.98876	4.58566	7.45065	4.66912	4.40249	6.75095	4.6507	6.50335	5.12093	4.34692	5.16668	5.18696	5.41103	5.27365	4.93512	4.98928	4.60707	4.91987	4.79429	5.05436	4.40305	4.71152	4.84479	6.29271	4.10234	7.14534	4.95649	4.90087	5.1349	4.67914	4.96171	7.79356	4.80884	7.40162	5.52556	4.69966	7.57071	4.66556	7.39819	4.76693	4.40093	5.56587	5.03353	5.82069	4.67673	8.90294
XCL1	4.91818	5.00551	4.76888	4.98876	4.5017	5.94369	5.04495	5.16579	7.15534	4.7885	5.04767	5.12093	4.34692	5.16668	5.18696	4.80274	5.27365	4.93512	4.98928	4.60707	4.91987	5.44544	5.05436	4.40305	4.71152	4.84479	5.48535	4.10234	6.35179	4.95649	4.90087	4.79094	4.67914	4.96171	5.22721	4.80884	5.5212	5.67756	5.23093	6.07886	5.18536	5.93876	4.76693	4.40093	5.82113	5.03353	5.49876	5.93042	5.23309
PSMB5	6.64411	6.39455	6.82436	6.80066	6.61314	7.77613	6.73884	6.93362	8.52147	6.49899	7.90138	6.6905	6.2463	6.9013	6.92179	6.91146	6.79853	6.4176	6.20606	7.00222	6.48855	6.46651	7.00747	6.61524	6.99538	6.64205	7.29271	6.06091	7.78475	6.63623	6.77221	6.83197	7.4109	6.50862	7.75559	6.79895	7.84313	6.41453	6.66587	8.06754	6.43912	8.13253	6.88347	6.91157	7.46966	6.8738	7.29132	7.07178	7.29722
PLA2G6	4.91818	5.00551	4.76888	4.98876	4.52907	5.32025	4.66912	4.4799	6.57038	4.6507	5.3107	5.12093	5.21387	5.16668	5.18696	4.80274	5.27365	4.93512	4.98928	4.60707	4.91987	4.79429	5.05436	4.40305	4.71152	4.84479	6.16985	4.10234	7.17282	4.95649	4.90087	4.61855	5.94458	4.96171	6.30813	4.80884	6.45408	5.52556	5.17649	6.7793	5.23981	6.57103	4.76693	4.40093	5.85961	5.03353	5.54938	4.67673	5.58102
CMA1	5.49294	5.74686	5.50886	5.89229	4.69257	4.86569	6.27941	5.93362	6.75095	5.88366	4.77636	6.49946	6.66133	5.16668	5.99074	4.86083	6.11736	5.83263	6.96385	5.46972	6.47106	6.11287	5.94858	6.39546	4.71152	5.87032	6.29271	6.02696	6.4449	5.81681	5.89151	5.89786	6.22022	4.96171	5.28166	6.02483	5.76221	6.55203	6.23093	5.88621	6.06989	5.20179	5.45213	5.3931	6.3396	6.44966	5.39184	5.74985	5.58102
NOD1	5.76712	5.67285	5.87499	5.86992	6.31148	7.14422	6.1863	5.81432	7.70788	5.47881	7.27594	6.03683	5.21387	6.98456	5.7392	6.07585	5.68564	5.36315	6.12514	6.92915	6.26325	5.81741	5.92433	6.11405	6.25318	5.72222	6.26296	5.76393	7.22626	6.91917	6.27178	5.79094	6.3971	6.09358	7.06593	5.9607	6.86912	5.89996	5.90231	6.88621	5.97678	7.53569	6.61719	5.43157	7.24104	6.33571	6.95819	6.97224	7.78489
ATG7	6.84804	7.18869	6.79837	7.05975	7.26892	7.38692	6.80297	6.12626	8.40495	6.86823	6.76387	6.36578	6.50933	7.30918	6.77315	6.98422	6.16627	6.5082	6.35543	6.68474	6.89487	7.54781	6.6999	7.03419	6.82937	7.32012	7.15373	6.76393	7.67372	6.45726	6.69559	7.24025	7.3971	7.38593	8.81217	5.93867	8.33789	7.12823	6.8336	8.15567	7.86863	8.25345	8.05159	6.65938	6.96923	6.43128	7.13435	7.12836	8.59384
CCL20	4.91818	5.00551	4.76888	5.15533	4.5017	6.26055	5.24288	4.91053	7.15534	4.6507	5.82527	5.12093	5.14676	5.63541	5.18818	5.37541	5.27365	4.93512	4.98928	4.60707	4.91987	5.26487	5.05436	4.40305	4.71152	4.84479	5.88745	4.10234	7.30288	4.95649	4.90087	4.61855	5.55464	4.96171	6.65605	4.80884	6.73419	5.81507	4.69966	7.26868	4.66556	6.44972	5.45213	4.40093	5.41903	5.03353	5.27637	4.67673	6.29722
PRKCB	8.65539	8.98462	8.90879	8.70598	9.81743	9.94052	9.08419	8.54879	12.1762	8.51394	9.7623	8.51848	8.48236	9.68811	8.5789	8.7814	8.79076	8.86238	8.76899	9.0111	8.69471	9.27087	8.86187	9.01649	9.52167	8.96398	10.7561	8.55946	10.8046	8.84309	8.66578	8.76646	10.2084	9.15998	10.5112	9.05586	10.75	8.92042	8.28983	11.0998	9.33355	10.4338	10.096	8.23349	10.3531	8.61756	10.2091	9.78547	11.018
C5aR1	8.43518	8.95891	8.89965	8.78281	9.31358	9.87235	8.72567	7.61455	11.2965	8.07726	10.6101	8.5279	8.46869	8.77057	8.1413	8.98422	7.79076	8.37695	8.40198	8.78131	8.30333	9.00544	7.74905	9.21838	9.20314	7.92216	10.0089	8.2857	10.5377	8.66892	7.9366	8.89786	9.39362	8.70957	10.6156	8.48236	9.71998	8.41453	8.16953	10.0845	9.53749	11.0752	9.72515	8.891	10.4461	8.0407	9.80515	9.00787	10.8167
LGALS3	12.0225	11.7457	12.0958	11.7064	12.1343	11.952	11.6846	10.8374	13.066	11.529	12.1138	11.1905	11.6815	12.1231	11.2638	11.878	10.7966	11.8064	11.8841	11.3313	12.006	12.8151	11.7916	12.5567	11.9353	12.2714	12.1497	11.2785	13.2535	11.514	10.9408	12.2345	12.137	12.4142	12.25	11.5134	10.7708	12.0001	11.4339	12.0929	13.0934	12.8537	12.9974	11.4563	12.1825	11.767	12.16	11.9645	12.334
MRC1	4.91818	5.04942	4.76888	4.98876	5.64011	6.17689	4.81546	4.40249	6.79277	4.6507	5.98447	5.20284	5.278	6.07598	5.18696	4.91146	5.27365	5.18627	5.7101	5.46972	4.91987	5.88154	5.05436	5.13607	4.71152	4.84479	5.63219	4.80457	6.4449	5.31431	4.90087	5.0447	4.67914	5.15498	6.05033	5.50127	6.38369	5.72487	5.6855	6.91175	5.87724	6.10868	6.24062	4.40093	6.10353	5.23334	5.54938	4.67673	5.86112
ENTPD1	6.21642	6.52647	6.83719	6.59785	6.95131	6.76901	6.46528	6.22312	7.8923	6.08395	5.94075	5.82902	5.79884	7.80533	6.13696	6.63844	5.71881	6.1705	6.17958	7.27708	6.45336	6.78425	5.87458	6.56741	7.19974	6.41966	7.24785	6.21961	8.14534	6.2685	6.16216	7.05629	7.08897	6.89195	7.28166	6.06605	6.9925	6.38538	6.43024	7.94922	6.94436	6.84565	8.46843	6.64308	7.22639	6.65368	8.02232	6.79716	6.13121
SMAD7	6.08905	6.43988	6.49274	6.19185	7.10439	7.87898	6.46528	6.00073	7.61768	6.13642	7.18517	6.18707	6.33941	7.66094	6.30108	6.07585	6.23666	6.08897	5.88413	6.85219	6.0204	6.67991	6.15021	6.41361	7.26624	6.34566	7.23259	6.49262	9.21308	6.67186	6.45339	6.21979	7.65085	6.39445	8.42764	6.68449	8.30969	6.9406	6.23093	7.84704	6.87724	7.66122	7.41896	6.50557	7.22639	6.48573	7.18326	6.42792	9.08654
IDO1	10.4286	11.0384	10.8656	10.5608	12.9195	13.2438	10.7032	10.0305	14.9314	10.2847	13.5799	9.93431	8.05822	13.0036	9.68673	10.7224	10.2636	10.1606	9.30734	12.479	9.2505	8.41868	10.9531	10.7101	12.9848	11.3939	12.7508	10.0075	13.086	11.6792	10.2674	10.9234	12.2474	11.2722	13.895	11.1282	14.7526	7.9406	9.85975	14.3838	9.11792	12.5945	13.2544	9.70917	13.9083	9.66158	13.9806	13.122	13.8758
CCR3	5.88686	6.58143	5.44327	5.32936	6.8739	5.75465	6.87635	7.06486	6.24845	6.63285	5.00585	5.70165	5.66133	7.63541	6.13696	6.09787	6.95982	5.79199	6.74662	5.74983	6.9464	6.38035	7.36362	6.84657	5.96367	6.70259	6.20156	5.67904	6.90433	6.67186	7.18102	6.74871	5.55464	6.95084	6.73622	6.91631	6.48803	5.57803	6.2834	6.03305	5.39182	6.23154	6.85068	5.22804	5.82113	7.2227	5.54938	6.26922	5.86112
BCAP31	7.47607	7.42493	7.73811	7.72791	7.64677	7.90521	7.54994	7.51858	8.4579	7.52874	7.51084	7.23387	7.5358	7.65248	7.67481	7.82166	7.6081	7.50191	7.62437	7.49526	7.75013	8.07908	7.72117	7.69901	7.83814	7.89647	7.73328	7.73268	7.88784	7.49089	7.28055	7.56624	7.88648	7.63611	7.67652	7.51622	7.17029	7.75936	7.64597	8.05614	7.76105	7.91145	8.11509	7.6755	7.3396	7.58051	7.87131	7.44287	8.19151
PRDM1	7.31934	7.20629	7.14629	7.2708	8.26026	6.96878	7.47318	7.73112	8.33591	7.45319	6.95181	7.11391	7.2936	8.81674	7.11065	7.10876	7.25938	7.39063	7.35543	8.01992	7.63707	7.78425	7.74905	7.52631	8.53791	7.29413	8.39224	7.70073	9.93675	7.89425	7.23616	7.36663	8.80518	7.31597	7.78416	7.85882	8.11705	7.75936	7.37086	7.80678	7.8858	7.00915	8.58764	6.84186	8.49432	7.38429	8.79993	8.23528	7.46016
ITGA4	10.3205	10.3782	10.6113	10.2297	10.4626	7.61859	10.4302	10.3216	8.49637	10.1556	7.46528	10.3159	10.2281	10.2724	10.3393	10.2629	10.3887	10.2154	10.5188	10.1781	10.2772	10.2283	10.5672	10.436	10.263	10.7014	9.56064	10.5173	8.99179	10.4884	10.5001	10.3771	10.2493	10.3415	7.90181	10.5602	7.94441	10.4396	10.2656	8.1978	9.9382	7.70429	10.5663	10.3181	9.9493	10.4405	10.246	10.3802	7.7044
IRF1	9.76538	9.58143	9.95365	10.1131	11.4999	10.078	10.6896	9.45419	11.3163	9.65886	10.2671	9.08016	9.23826	12.2466	9.67181	9.82991	9.18419	9.62993	9.52536	11.2835	9.92729	10.2467	10.3827	10.6925	11.7853	9.88998	11.3344	9.34545	11.9995	10.7806	9.25185	10.2803	11.524	10.1687	10.3081	10.2924	11.1923	9.43601	9.82919	10.3433	10.5416	10.0763	11.7952	9.65938	11.6958	9.81654	12.1239	11.3498	10.8126
CCL23	4.91818	5.00551	4.76888	4.98876	4.58566	9.05331	4.66912	4.4799	7.44484	4.6507	8.00585	5.12093	4.34692	5.16668	5.18696	4.80274	5.27365	4.93512	4.98928	4.60707	4.91987	4.79429	5.05436	4.40305	4.71152	4.84479	6.70037	4.10234	5.83721	4.95649	4.90087	4.61855	4.67914	4.96171	8.1992	4.80884	7.84313	4.66776	4.69966	7.9615	4.66556	9.60267	4.76693	4.40093	4.65486	5.03353	4.1917	4.67673	9.36985
RAF1	8.1752	8.52296	8.73125	8.42835	8.29885	7.9117	7.92903	7.69105	8.86316	7.77201	7.80103	7.63347	7.93435	8.92959	8.11507	8.87685	7.71881	8.31017	8.09712	8.17016	8.56883	9.04448	7.9842	8.91823	8.56458	8.78423	7.86782	8.416	8.76682	7.77374	7.88577	8.88167	8.53586	8.82741	9.03457	7.8705	8.71998	8.65332	8.08338	8.03305	9.3051	8.76149	9.44939	8.82389	8.41903	8.02852	8.47276	8.42792	8.80157
LTB4R	5.42423	5.98971	5.37456	5.45489	6.49993	7.77613	5.81546	4.95634	8.82336	5.16196	7.3107	5.12093	5.50933	6.12573	5.18696	5.75392	5.27365	5.47006	5.46909	5.30622	5.69847	6.11287	5.59628	6.3205	5.82937	5.64205	7.30735	5.33508	7.80245	5.61199	5.23616	5.29996	6.69666	6.1348	8.44563	5.20171	7.29058	5.9406	4.69966	7.94922	6.50729	8.28217	7.18909	5.93853	6.98672	5.35534	6.71377	6.36652	8.83975
IRGC	4.91818	5.00551	4.76888	5.42451	5.69257	8.41914	5.48104	4.81432	9.13109	4.6507	8.2084	5.12093	4.34692	5.99798	5.18696	5.05348	5.27365	4.93512	4.98928	6.27708	4.91987	5.97269	5.05436	4.89903	5.93125	4.84479	8.4659	5.442	9.33364	5.12166	4.95863	5.3759	6.31137	5.68549	8.6967	4.80884	8.81665	5.77067	5.38294	9.05614	6.00849	9.03889	6.86717	4.40093	7.41903	5.23334	7.59829	5.97224	9.39205
S100A9	12.9996	13.0994	13.3135	14.3114	15.0441	17.4589	14.0294	12.1921	19.2791	12.3962	17.4318	11.4279	13.2851	14.9483	13.4968	13.6662	11.8154	12.5473	12.6994	14.8637	13.452	14.9816	13.2989	14.6679	14.8747	12.8557	18.2215	13.5228	18.98	12.8638	11.7515	14.0121	15.6114	13.7934	17.8269	11.9576	17.8547	13.597	13.6694	18.6586	15.4378	18.4565	16.0715	12.2481	17.1106	12.9151	17.1134	15.1082	18.0359
TOLLIP	4.91818	5.83996	5.77189	6.11785	5.92961	7.64996	5.51207	5.86323	9.15534	5.41653	7.80103	5.48663	5.61242	6.68603	5.84938	6.03076	5.95982	5.7288	6.00966	6.85219	5.11351	6.44544	6.01897	6.33961	6.08653	5.79817	8.50455	5.8441	9.01475	4.95649	5.66912	6.11287	6.78412	5.93925	7.90181	5.50127	8.34717	6.47111	6.03064	8.74419	6.39182	8.64474	7.18909	5.5412	7.35315	5.95324	7.44629	6.5434	8.06828
CLU	5.66659	8.37524	7.65363	7.07938	8.71811	8.95942	5.79037	5.93362	8.50897	6.12348	8.90707	5.88873	7.64926	8.35162	7.0657	7.98422	5.65169	5.7288	5.85096	7.39029	5.89487	8.27684	5.79657	5.8196	7.96367	6.24069	7.9634	6.46753	9.08875	6.2212	6.27178	7.53345	8.74105	8.41968	8.99438	6.16423	9.39716	8.02806	7.1054	9.73349	8.00849	9.92744	8.36193	7.22804	6.89708	6.35534	7.59829	6.57088	10.1135
IL1B	7.62127	7.33981	6.61692	8.34971	9.66001	8.74379	8.09703	7.27826	10.5121	7.60519	7.3107	6.85919	7.14676	10.0696	8.05654	7.35726	6.63441	7.48926	6.90043	9.75776	7.11351	8.73736	7.66374	7.77116	9.66164	7.06736	9.85791	7.68993	11.6869	8.03768	6.96951	7.53345	9.98668	8.19937	8.88432	8.33416	9.79308	8.21362	7.9679	10.1821	8.83807	8.86	10.2532	7.95183	10.0649	7.42201	10.7152	8.93042	8.35862
PML	4.94932	5.39455	5.30241	5.39349	7.73697	8.0708	7.46528	5.62876	9.76677	5.89892	7.76387	5.37972	5.88373	6.98456	5.80631	5.86083	5.27365	5.44407	5.85096	7.59311	5.47106	5.84983	5.50112	6.11405	7.73861	4.84479	8.79694	5.38953	9.37563	7.10438	5.40608	5.87186	8.3971	5.62891	8.91909	6.78667	9.19619	5.62865	5.76145	9.09566	6.18536	8.76658	6.57766	6.29217	8.53649	5.5382	8.74125	8.11908	9.07287
HSH2D	6.97957	6.74686	7.17688	7.46984	9.0145	8.17689	8.85835	6.88707	10.1831	7.22388	7.59786	6.73456	6.84191	7.75089	6.80631	7.63844	6.91759	6.96649	6.86764	8.72306	7.27338	7.51785	7.07511	7.91823	9.22001	7.11268	9.68081	6.95657	10.0669	8.12166	6.9366	7.54993	9.57624	7.1348	9.02263	7.8993	9.73065	7.29424	7.01521	9.70821	8.04717	8.49335	8.17592	7.48743	9.28056	7.2227	9.56792	9.4832	8.56156
REPS1	7.18562	7.43242	7.50082	7.04983	6.80408	6.86569	6.99091	7.22312	7.66348	7.06378	7.38599	7.51217	6.90419	7.13791	7.10177	7.27265	7.2928	7.47649	7.03941	6.83229	6.959	7.28872	6.76961	6.84657	6.94755	7.02056	7.41947	6.97449	7.92063	7.05127	7.53628	7.30967	7.12292	7.41968	7.06593	7.37574	7.08413	7.14571	6.47605	7.24878	6.80685	6.84565	7.20215	6.97806	7.16627	7.00386	7.1992	6.7256	7.43187
CXCR3	4.91818	5.16189	5.47644	5.03985	5.24277	7.01769	5.60134	5.41577	7.15534	5.16196	6.37781	5.53726	5.75444	5.60064	5.84938	5.7259	5.27365	5.81246	5.63415	5.30622	5.57294	5.84983	5.6564	5.7641	5.22671	5.8347	6.72239	5.54153	7.30288	5.3732	5.55809	5.61406	5.94458	5.37737	7.56019	5.40816	7.06177	5.52556	5.79798	7.58665	5.80685	6.95668	5.9927	5.88408	6.16627	5.78974	6.04896	5.65031	6.68055
MAP3K5	8.18302	7.95371	8.04491	8.07938	8.89084	7.98116	8.40457	8.18996	10.3535	8.03987	7.30209	7.95074	7.74313	8.40296	8.01931	8.09787	8.00757	8.10979	7.77342	8.58123	8.03237	8.32952	7.91205	8.458	8.79825	8.30718	9.26296	8.32114	9.75324	8.4367	8.07914	8.20944	9.13129	8.20422	8.43366	8.24274	8.75525	8.2053	8.09076	9.21841	8.56707	7.93876	9.12883	7.7761	9.16627	7.99137	9.51477	9.27341	8.35109
TBX21	6.54241	6.56789	7.39205	6.90335	5.52907	5.53706	7.53491	7.8572	6.91141	6.82092	5.47297	6.9272	7.86297	5.97101	7.31651	7.07585	7.75123	6.93883	8.10418	7.20153	8.0204	7.66176	7.60393	7.94343	6.79375	6.88781	6.99993	7.1738	7.19978	6.48423	7.57957	7.36663	7.42458	6.27046	6.45751	7.17369	6.58533	7.7819	7.53133	6.40078	7.31781	6.68292	6.40773	7.55868	6.7816	7.54676	6.47276	7.23528	6.09559
C14orf166	8.20367	8.41361	8.7652	8.32936	8.22507	8.49018	8.42916	8.36573	9.24845	8.24793	8.59434	8.47044	8.44094	8.36721	8.55958	8.3481	8.83302	8.23636	8.58457	8.58718	8.25817	8.44013	8.60774	8.31568	8.292	8.61606	8.64954	8.49262	8.39909	7.98201	8.15264	8.36197	8.23582	8.27046	8.25469	8.37574	8.63162	8.0186	8.35869	8.65629	7.84248	8.52372	8.08721	7.74589	8.49432	8.39855	8.39876	8.50829	8.32825
XCR1	4.91818	5.00551	4.76888	4.98876	4.5017	5.57023	4.66912	4.40249	6.83341	4.6507	5.6463	5.12093	4.34692	5.16668	5.18696	5.18276	5.27365	4.93512	4.98928	5.56926	4.91987	4.79429	5.05436	4.40305	4.71152	4.84479	6.03555	4.10234	6.61482	4.95649	4.90087	4.61855	4.67914	4.96171	6.1992	4.80884	7.63162	4.66776	4.69966	6.07886	4.66556	6.57103	5.40773	5.5412	5.96923	5.03353	5.49876	4.67673	6.02159
IL15	6.3428	6.66014	6.18693	6.76474	7.1981	6.13317	6.43322	5.93362	6.75095	5.88366	6.39412	6.79822	5.66133	7.03751	6.54328	6.52921	6.04074	6.36315	6.46909	6.9843	5.6681	6.5868	7.46795	6.43153	6.51621	7.09773	6.29271	6.36256	6.76682	6.67186	5.40608	5.54993	6.82594	6.64327	6.14148	6.56016	6.76221	6.4431	6.64597	6.28831	6.55101	6.86476	7.24062	5.93853	6.93361	6.12316	6.90086	6.33481	6.44609
SMAD2	8.26635	8.43615	8.60197	8.4052	8.25591	7.75465	8.40457	8.39096	8.81323	8.24495	8.01642	8.20675	8.2463	8.35683	8.25777	8.43718	8.20774	8.37007	8.46361	8.20926	8.49721	8.75886	8.58085	8.61132	8.22001	8.65232	8.16181	8.46753	8.73952	8.2685	8.3405	8.6374	8.36199	8.57751	8.42159	8.52364	7.93213	8.59722	8.30894	8.18738	8.62958	8.54757	8.74758	8.34352	8.25553	8.4359	8.4923	8.63737	8.63785
ITLN2	4.91818	5.00551	4.76888	4.98876	4.7432	5.94369	4.86437	4.76369	6.61768	4.6507	5.80103	5.12093	5.278	5.16668	5.18696	4.80274	5.27365	5.12214	5.67262	4.60707	4.91987	4.79429	5.12915	5.09168	4.71152	5.37075	6.07032	5.02696	7.08875	4.95649	5.04351	4.94848	5.60355	4.96171	6.14148	4.80884	6.38369	4.66776	4.69966	6.93684	4.66556	6.6392	5.31463	4.40093	5.46966	5.03353	5.7358	4.67673	5.4741
NCAM1	4.91818	5.33182	5.14629	5.72791	5.24277	5.75465	5.31503	5.0438	6.79277	4.651	5.61882	5.12093	4.34692	5.16668	5.28548	5.26293	5.27365	5.02026	5.67262	5.56926	4.91987	5.44544	5.05436	5.37708	5.51621	4.84479	6.13743	5.33508	7.17282	4.95649	4.95863	5.3759	5.60355	5.15498	6.75559	4.80884	6.96866	5.85814	5.52044	7.18738	5.69438	6.54757	5.53702	6.09054	6.19664	5.39381	5.97681	4.67673	6.05906
MAP2K6	6.1001	6.58143	6.68943	6.37772	5.49993	6.06499	6.1863	6.44819	6.61768	6.17456	6.06813	6.33749	6.278	6.24309	6.47616	6.42852	6.5813	6.44407	6.51216	6.1218	6.32296	6.33526	5.92433	6.06896	5.64174	6.41966	6.45936	6.06091	7.48929	6.10438	6.28927	6.44805	6.18851	6.07252	6.30813	6.34257	6.81665	6.32526	6.33403	6.83374	6.29228	6.17142	6.13565	6.35357	6.07111	6.48573	6.30611	5.97224	6.29722
ABL1	4.91818	5.00551	4.76888	4.98876	4.52907	7.24008	4.66912	4.65678	6.98541	4.6507	6.67327	5.12093	4.34692	5.16668	5.18696	5.00768	5.27365	4.93512	4.98928	4.60707	4.91987	4.79429	5.05436	4.40305	4.71152	4.84479	5.9634	4.10234	6.76682	4.95649	5.23616	4.61855	4.67914	4.96171	7.35966	4.80884	7.40162	4.66776	4.69966	7.2286	5.57239	6.97438	5.40773	5.09054	5.36657	5.03353	5.01333	4.67673	7.95357
BCL2L11	7.04396	7.32378	7.30241	7.40131	7.55764	7.17689	7.49664	7.05437	7.02104	6.97292	7.09829	6.81883	7.02123	7.78225	7.27762	7.33888	7.09227	6.84262	7.39048	7.41726	7.13587	7.57715	7.26086	7.78517	7.292	7.41966	7.13743	7.38953	7.85429	7.23714	7.10406	7.24025	7.29657	7.53964	8.17782	7.19243	7.81665	7.38538	7.32154	7.84704	7.6448	8.20929	8.09424	6.813	7.21159	7.26482	7.33526	7.70094	7.68055
VCAM1	4.91818	5.00551	4.76888	4.98876	4.5017	4.57023	4.66912	4.40249	6.24845	4.6507	4.72574	5.12093	4.34692	5.16668	5.18696	4.80274	5.27365	4.93512	4.98928	4.60707	4.91987	4.79429	5.05436	4.40305	4.71152	4.84479	4.75384	4.10234	6.39909	4.95649	4.90087	4.61855	4.67914	4.96171	5.43366	4.80884	6.73419	4.66776	4.69966	6.57071	4.66556	5.93876	4.76693	4.40093	4.65486	5.35534	5.08372	4.67673	5.41752
MMP9	8.07791	8.44359	7.19692	8.47355	9.9687	10.2388	7.39211	7.54879	11.2219	7.20558	10.3561	6.7878	7.78787	9.23178	7.31651	7.8479	7.16627	7.5082	7.24487	7.87182	7.71342	9.37757	8.05291	8.98042	7.67149	7.56805	8.9164	7.42906	11.7245	7.84309	7.19963	7.81842	8.60355	9.04305	10.4868	6.83517	8.46265	7.99949	7.85975	8.89264	9.99668	10.7792	10.658	7.18365	8.55419	7.44966	7.85127	9.47232	9.44609
NT5E	4.91818	5.00551	5.01701	4.98876	4.5017	5.19826	4.66912	4.40249	6.47084	4.6507	5.44195	5.12093	4.34692	5.16668	5.18696	4.80274	5.27365	4.93512	4.98928	4.60707	4.91987	4.79429	5.05436	4.40305	4.71152	4.84479	5.63219	4.10234	4.34909	4.95649	4.90087	4.61855	4.67914	4.96171	5.8487	4.80884	5.96866	4.66776	4.69966	5.98575	4.66556	6.20179	4.76693	4.40093	5.51857	5.03353	4.1917	4.67673	8.46715
CFB	4.91818	5.00551	4.76888	4.98876	4.5017	5.06499	4.66912	4.40249	4.20188	4.6507	4.72574	5.12093	4.34692	5.16668	5.18696	4.80274	5.27365	4.93512	4.98928	5.30622	4.91987	4.79429	5.05436	4.40305	4.71152	4.84479	4.75384	4.10234	4.34909	4.95649	4.90087	4.61855	4.67914	4.96171	5.17063	4.80884	6.96866	4.66776	4.69966	6.53829	5.23981	6.14039	4.76693	4.40093	4.65486	5.03353	4.1917	4.67673	5.98312
MAPK1	9.66938	9.63113	10.0057	9.91705	9.86393	9.01167	9.69895	9.68426	10.2026	9.56867	9.04509	9.53881	9.46525	10.0456	9.67031	9.93153	9.55629	9.76468	9.82557	9.67639	10.0339	10.2253	9.97242	10.1752	9.99734	10.05	9.61758	9.87782	10.2998	9.58421	9.6791	10.0462	9.97511	9.99768	9.46341	9.63741	8.85618	9.92042	9.72397	9.30286	10.2196	9.46232	10.2719	9.7761	9.81625	9.74579	10.0987	9.99778	9.54845
MKNK1	7.50547	7.22367	7.17688	7.63148	8.92414	9.00864	8.63696	7.10608	10.3145	7.51394	8.59786	7.13871	7.33941	8.01788	7.08385	7.45436	7.16627	7.36315	7.13894	8.22461	7.0677	8.00184	7.18124	7.68414	8.61137	7.19927	9.55758	6.95657	9.83291	8.06473	7.18102	7.51677	9.54528	7.39445	9.81679	8.08623	9.62782	7.4431	7.23093	9.82705	7.82477	9.10868	8.55748	6.62659	9.37986	7.21197	9.32076	8.84858	9.35109
BLNK	6.00919	5.94849	5.79837	6.51378	6.0145	5.83872	6.24288	6.0438	6.66348	6.24793	5.41024	6.36578	6.03984	6.58294	6.56927	6.35726	6.38866	6.60522	6.03941	6.52035	6.0204	6.42407	6.28961	6.37708	6.19974	6.64205	6.37844	5.88257	6.76682	6.2992	6.52894	5.58236	6.34051	6.19451	5.88432	6.40816	6.41932	6.29424	6.25741	6.20814	6.43912	6.23154	6.31463	6.16093	6.07111	6.41267	6.04896	6.42792	5.16598
CXCR2	10.2509	10.5568	10.0628	10.706	11.4758	8.78322	10.629	9.45019	11.6162	9.90461	8.27153	9.06729	9.82322	11.4136	9.98351	10.3481	8.66877	10.0529	9.18957	10.7068	9.94481	11.1766	10.3704	10.4958	11.1066	10.5517	12.0964	9.98999	13.0888	9.60125	9.24962	10.7831	11.7513	11.2489	10.4261	9.88209	10.7587	10.5732	10.1886	10.7965	11.2348	9.63085	12.2013	10.1218	11.99	9.79334	12.1286	10.7453	9.12239
GZMK	7.41982	6.45467	8.75847	7.20084	5.49993	5.46835	7.63696	7.63582	6.41837	7.56269	5.34465	7.82394	7.50933	5.94353	7.27762	8.14624	7.54478	7.766	8.07575	6.49526	7.96526	7.60591	8.05291	7.82639	7.26624	8.26096	6.78652	7.264	6.93675	7.00547	7.45339	8.92339	6.86658	6.07252	6.05033	7.6645	5.96866	7.60356	7.49842	5.66382	7.06989	5.70429	5.36193	8.3931	6.82113	8.13457	6.18326	6.7737	5.68055
CSF3	4.91818	5.19752	4.76888	4.98876	4.5017	6.1108	5.16694	4.86323	7.02104	4.6507	5.47297	5.12093	5.45488	5.73494	5.18696	5.47974	5.68564	4.93512	4.98928	5.30622	4.91987	5.40237	5.05436	4.40305	4.71152	4.84479	4.75384	4.10234	6.53236	4.95649	5.12368	5.17797	5.74105	4.96171	6.7747	5.04559	7.08413	5.52556	5.2834	6.32678	5.23981	6.20179	5.65566	5.04163	5.46966	5.43128	5.33526	4.67673	6.98312
DPP4	6.61357	6.66014	6.81142	6.58417	6.13315	6.64996	6.26126	6.43207	6.0558	6.74692	5.77636	7.16309	6.3983	6.19729	6.78429	7.27265	6.48819	6.94811	6.57444	6.63965	6.50582	6.81741	6.78315	6.33961	6.75722	7.06736	5.99993	6.76393	6.57418	6.54952	6.37366	6.66036	6.50401	6.19451	5.73622	6.99312	6.06177	6.65332	6.49842	5.88621	6.06989	5.07626	6.24062	6.85607	6.61168	6.44966	6.33526	6.20051	6.26551
IRAK4	7.15414	7.01987	7.5716	7.14605	7.61314	7.48584	7.42509	7.29619	7.87294	7.11043	6.65985	6.81883	6.9639	7.93658	7.11947	7.52108	7.12974	7.4176	7.19288	7.33479	7.51439	7.56743	7.21161	7.2616	7.82055	7.17098	7.84792	6.92005	7.39909	7.0869	7.22711	7.72713	7.46484	7.44449	7.89309	7.25616	7.58533	7.34053	7.53133	8.07886	7.45071	7.69365	8.41336	7.11438	7.69914	7.32579	8.08372	7.7256	8.16598
SKI	4.91818	5.00551	4.9239	5.29619	4.64011	6.83872	5.08677	5.24174	4.20188	4.82092	6.48824	5.12093	4.34692	5.16668	5.25377	5.63844	5.27365	4.93512	5.55398	4.60707	5.28343	4.79429	5.05436	5.33961	4.71152	4.84479	4.75384	4.10234	4.34909	4.95649	5.30655	5.29996	4.67914	5.34261	7.11173	5.12576	6.45408	6.05608	5.60533	6.9615	5.52932	7.04309	5.834	6.16093	4.65486	5.50343	5.08372	5.59785	8.76802
PTPN6	8.27857	8.45835	8.77856	8.79474	9.17754	8.54543	8.73556	8.28277	9.66348	8.21476	8.77636	8.07159	8.06733	8.99798	8.68376	8.61953	8.36266	8.48926	8.43032	8.91976	8.68715	8.67539	8.64902	9.02537	8.93534	8.77016	9.10845	8.62333	9.05961	8.3514	8.35302	8.59433	8.77347	8.70615	9.2716	8.24722	8.46265	8.25449	8.37691	8.91175	8.34911	9.37838	9.38215	8.95843	9.01682	8.72331	9.35674	8.67585	9.59384
DAXX	4.97357	5.08789	5.47644	5.65128	5.17062	6.32025	5.31503	5.44819	6.61768	5.41653	6.18517	5.32313	5.45488	5.16668	6.02871	5.7814	5.54478	4.93512	4.98928	5.9843	5.36143	5.97269	5.17097	5.55111	5.75722	6.06736	5.63219	5.63464	6.4449	4.95649	5.30655	5.64509	5.90611	5.15498	6.8487	5.61675	6.94441	5.81507	5.79798	6.86022	5.52932	6.52372	5.45213	5.50557	6.10353	5.84632	5.59829	5.59785	6.72786
IFNA1/13	4.91818	5.00551	4.76888	4.98876	4.5017	4.57023	4.71237	4.40249	4.20188	4.6507	4.48415	5.12093	4.34692	5.16668	5.18696	4.80274	5.27365	4.93512	4.98928	4.60707	4.91987	4.79429	5.05436	4.40305	4.71152	4.84479	4.75384	4.10234	4.34909	4.95649	4.90087	4.61855	4.67914	4.96171	4.6967	4.80884	5.91975	4.66776	4.69966	5.53829	4.66556	5.00915	4.76693	4.40093	5.46966	5.03353	4.1917	4.67673	5.4741
MX2	8.78264	7.51239	7.98855	7.77682	12.8228	12.5774	12.4712	7.99525	14.2181	9.59702	11.7941	8.39008	7.64926	9.81105	7.58847	7.4198	8.11736	7.9981	8.11818	12.4339	7.93369	8.01619	9.25114	9.15507	12.5389	8.05966	13.6056	7.36256	13.937	11.7339	8.07914	7.57432	13.3542	7.81795	13.037	11.6094	13.4584	7.92042	7.70487	13.7148	8.24648	12.7345	10.4965	6.97806	13.195	8.85669	13.4127	12.7818	12.8691
BTLA	7.21134	6.82865	6.9239	6.99921	6.71811	5.69576	6.95748	6.93362	6.47084	6.52874	5.84912	7.30863	6.50933	6.56502	7.41297	7.03076	7.12974	7.31376	6.86764	6.36281	7.43544	6.7503	6.82305	6.8861	6.64174	6.9722	6.56064	6.70073	6.93675	6.5367	7.37366	6.81842	6.31137	7.428	5.61423	6.94973	6.30969	7.0186	6.72397	6.72271	5.91119	6.6392	7.03709	6.59304	6.13524	7.44966	6.66868	6.20051	6.50158
MAPK3	7.59415	7.48382	8.0614	7.88673	7.67312	7.14422	7.50438	7.54879	8.68585	7.36249	7.78875	7.25671	7.83126	7.71882	7.6199	8.1776	7.67723	7.58752	7.44706	7.65105	7.63707	8.40783	8.01323	7.78517	7.98752	8.47855	7.51089	7.64587	8.4449	7.33667	7.52156	7.91068	7.80518	7.55491	7.74594	7.33416	7.03905	7.8041	7.46473	7.4539	8.40974	7.836	8.20863	8.20045	7.54242	7.3747	7.88123	8.13758	7.7044
CD9	10.7758	10.5035	10.8727	10.4197	10.7252	9.95786	10.4682	9.83745	10.9303	10.7885	10.5285	10.4408	10.1891	10.5995	10.2224	11.0055	9.77704	10.768	10.1164	10.3628	10.3803	10.8174	11.2358	10.3701	11.2474	11.4405	10.2479	10.4516	10.8024	10.646	10.0004	10.6895	10.756	10.5174	8.79356	10.6254	9.54961	10.6655	10.2508	9.18214	10.8654	10.2697	10.7229	10.5157	11.0369	10.2648	10.6715	10.0179	9.99041
AICDA	4.91818	5.00551	4.76888	4.98876	4.52907	4.12887	4.66912	4.40249	4.20188	4.6507	4.48415	5.12093	4.34692	5.16668	5.18696	4.80274	5.27365	4.93512	4.98928	4.60707	4.91987	4.79429	5.05436	4.40305	4.71152	4.84479	4.75384	4.10234	4.34909	4.95649	4.90087	4.61855	4.67914	4.96171	4.6967	4.80884	5.64673	4.66776	4.69966	5.60242	4.66556	4.93876	4.76693	4.40093	4.65486	5.03353	4.1917	4.67673	3.97551
CD207	4.91818	5.00551	4.76888	4.98876	4.5017	4.12887	4.66912	4.40249	4.20188	4.6507	4.48415	5.12093	4.34692	5.16668	5.18696	4.80274	5.27365	4.93512	4.98928	4.60707	4.91987	4.79429	5.05436	4.40305	4.71152	4.84479	4.75384	4.10234	4.34909	4.95649	4.90087	4.61855	4.67914	4.96171	5.17063	4.80884	5.45408	4.66776	4.69966	5.72271	4.66556	5.26069	4.76693	4.40093	4.65486	5.03353	4.93933	4.67673	5.02159
BID	8.2688	8.37135	8.59821	8.51378	9.39103	9.36346	8.9715	7.97314	10.2333	8.18082	9.51084	7.95074	8.1723	9.19146	8.31651	8.67919	8.32007	8.28109	8.53322	9.03306	8.57703	9.06534	8.85867	8.99255	9.16879	8.76543	9.16584	8.46119	9.43358	8.84309	8.1669	8.71255	9.41433	8.65748	10.3406	8.37983	10.2614	8.38538	8.53133	10.4495	8.82922	10.0515	9.53959	8.10251	9.04631	8.43128	9.18726	9.64062	10.6486
CTSC	6.74616	6.46932	7.51685	7.03985	6.7054	9.45287	7.69219	6.72452	9.40495	6.62369	9.25154	6.9081	6.84191	6.43292	6.97137	7.13029	7.11736	6.76074	8.1112	7.10531	7.63707	6.98734	7.45108	7.83987	7.40256	7.18519	8.60874	6.9922	8.50018	7.18055	6.62848	7.49138	6.92548	6.57002	9.7818	7.01434	8.75525	6.9406	7.03064	10.0418	6.36757	10.2425	6.80005	6.85607	7.26989	7.78251	7.87131	7.03278	9.89778
ATG16L1	4.91818	5.04942	5.26493	4.98876	4.7432	5.50312	4.66912	4.65678	6.70788	4.68662	5.44195	5.12093	5.278	5.16668	5.18696	5.4458	5.27365	5.2173	4.98928	4.60707	4.91987	5.64338	5.05436	4.94966	4.71152	4.84479	4.75384	4.88257	6.02986	4.95649	4.90087	5.17797	5.55464	5.02945	6.7747	5.04559	7.40162	4.66776	4.69966	6.69357	5.23981	6.68292	5.72966	4.76861	5.31212	5.03353	5.39184	5.5434	5.4741
KIR3DL3	4.91818	5.00551	4.76888	4.98876	4.5017	7.64996	4.66912	4.60019	6.24845	4.6507	6.95181	5.12093	5.50933	5.16668	5.18696	4.80274	5.27365	4.93512	4.98928	4.60707	4.91987	4.79429	5.05436	4.40305	4.71152	4.84479	4.75384	4.10234	7.11732	4.95649	4.90087	4.61855	4.67914	4.96171	8.60892	4.80884	8.89466	4.66776	4.69966	8.07886	4.66556	8.33793	4.76693	4.40093	4.65486	5.03353	4.93933	4.67673	7.58102
CEACAM6	4.91818	5.00551	4.82436	4.99921	4.97268	5.69576	4.71237	4.40249	7.0558	4.6507	5.69974	5.12093	5.14676	5.16668	5.18696	5.14094	5.27365	4.93512	4.98928	4.60707	4.91987	5.16534	5.05436	4.67664	4.71152	4.84479	4.75384	4.10234	6.76682	4.95649	4.90087	4.73436	4.67914	4.96171	5.57116	4.80884	5.91975	4.66776	5.23093	6.69357	5.29228	6.92061	5.31463	4.40093	4.65486	5.03353	5.49876	4.67673	6.4741
PRKCA	5.15414	5.96925	6.12553	5.8472	5.55764	5.35873	6.16694	6.34865	6.61768	5.55789	5.3107	6.12222	6.5358	6.05045	6.23765	6.2234	6.75123	5.7288	6.46909	6.1218	6.47106	6.52791	5.84904	6.41361	5.82937	6.46696	5.80728	5.88257	6.76682	5.66008	6.6557	5.70521	6.01858	5.91579	5.88432	6.14513	6.38369	6.79304	6.1199	6.40078	6.34291	5.61683	5.76529	6.43157	4.65486	6.41267	6.04896	6.79716	6.23309
CCL1	4.91818	5.00551	4.76888	4.98876	4.5017	4.96878	4.66912	4.41577	4.20188	4.6507	5.12784	5.12093	4.34692	5.16668	5.18696	4.80274	5.27365	4.93512	4.98928	4.60707	4.91987	4.79429	5.05436	4.40305	4.71152	4.84479	4.75384	4.10234	4.34909	4.95649	4.90087	4.61855	4.67914	4.96171	5.61423	4.80884	6.76221	4.66776	4.69966	5.7793	4.66556	5.61683	4.76693	4.40093	4.65486	5.03353	4.1917	4.67673	5.23309
HFE	4.91818	5.00551	4.9712	4.98876	4.5017	5.3962	5.04495	4.71122	5.91141	4.6507	4.48415	5.12093	4.34692	5.16668	5.18696	4.91146	5.27365	4.93512	4.98928	4.60707	4.91987	4.79429	5.05436	4.55111	4.71152	4.84479	4.75384	4.10234	6.08875	4.95649	4.90087	4.61855	4.67914	4.96171	5.48097	4.80884	6.38369	4.66776	4.69966	4.42073	5.29228	5.90223	4.76693	4.40093	4.65486	5.03353	5.27637	5.79716	5.4741
KLRC2	5.66659	5.36353	5.94774	5.86992	4.5017	4.57023	5.6854	5.08562	6.52147	5.77201	4.48415	5.80856	7.11199	5.63541	6.23765	5.96037	5.27365	6.36315	6.30734	4.60707	6.65267	7.09945	6.08608	6.79212	4.71152	4.84479	4.75384	5.442	6.14534	5.25291	5.19963	6.5983	6.36908	5.30698	4.9862	5.8705	5.91975	7.35564	6.43024	5.60242	6.09963	5.82628	6.16262	5.43157	4.65486	6.39381	5.82069	4.67673	5.63164
MS4A2	4.91818	5.19752	4.76888	4.98876	4.7432	4.12887	5.44934	4.71122	4.20188	4.75533	4.48415	5.12093	5.278	5.16668	5.18696	4.80274	5.27365	4.93512	5.51216	4.60707	4.91987	5.26487	5.05436	4.40305	4.71152	4.84479	4.75384	4.10234	5.96846	4.95649	4.90087	4.73436	4.67914	4.96171	4.7747	4.80884	5.70562	4.66776	5.23093	4.42073	4.66556	3.88692	5.40773	4.40093	5.36657	5.03353	4.1917	4.67673	3.97551
CASP2	6.63653	6.75883	6.0831	6.52814	6.57172	5.83872	6.65792	6.58569	6.12292	6.78028	5.59081	6.82902	6.48236	6.07598	7.08385	6.69734	6.71881	6.62849	6.61452	6.54501	6.80001	6.83371	6.74213	6.70639	6.35446	6.9885	6.29271	6.61192	6.53236	6.79543	6.52894	6.61406	6.8464	6.81795	5.48097	6.93867	6.5212	7.18006	6.76145	6.47117	6.26628	5.61683	6.45213	6.69144	6.16627	6.8738	6.66868	6.62432	6.29722
OAS1	5.37046	5.00551	4.76888	4.98876	11.3136	11.1789	10.4947	4.40249	12.3055	5.59585	10.7394	5.63347	4.34692	6.58294	5.22135	5.33888	5.27365	5.44407	4.98928	8.66799	4.91987	4.79429	5.05436	5.51794	9.35752	4.84479	13.1397	5.02696	12.8205	8.72652	4.90087	4.61855	11.5968	4.96171	10.7688	7.80505	13.464	4.66776	4.69966	13.3637	5.52932	11.9382	7.16262	4.40093	11.3345	5.57215	12.2388	9.14217	12.2171
CCL13	4.91818	5.00551	4.76888	4.98876	4.5017	4.28072	4.66912	4.40249	4.20188	4.6507	4.50335	5.12093	4.34692	5.16668	5.18696	4.80274	5.27365	4.93512	4.98928	4.60707	4.91987	4.79429	5.05436	4.40305	4.71152	4.84479	4.75384	4.10234	5.90433	4.95649	4.90087	4.61855	4.67914	4.96171	5.11173	4.80884	6.45408	4.66776	4.69966	5.60242	4.66556	4.52372	4.76693	4.40093	4.65486	5.03353	4.1917	4.67673	3.97551
CCL4	5.21642	5.08789	5.77189	5.32936	4.69257	6.66539	5.81546	5.68426	6.98541	5.18705	6.6463	5.82902	5.33941	5.41302	5.7392	5.86083	5.27365	5.6169	6.35543	5.74983	6.34233	5.81741	5.97242	6.09168	4.71152	5.55716	5.43289	5.49262	5.83721	4.97727	5.00169	5.89786	5.60355	5.07252	7.50405	5.77429	8.03905	5.77067	6.03064	6.86022	5.34291	7.61683	5.26572	5.91157	5.51857	6.19028	4.1917	5.59785	6.75094
CD160	4.91818	5.00551	4.76888	4.98876	4.79211	5.46835	4.81546	4.40249	4.20188	4.6507	5.27594	5.12093	4.34692	5.16668	5.18696	5.09787	5.27365	4.93512	4.98928	4.60707	4.91987	4.79429	5.05436	4.55111	4.71152	4.84479	5.43289	4.10234	4.34909	4.95649	4.90087	4.61855	4.67914	5.07252	5.81217	4.80884	6.9925	4.66776	4.69966	5.7793	5.65485	6.57103	4.76693	4.40093	5.65607	5.03353	4.1917	4.67673	5.68055
MAP3K9	4.91818	5.00989	4.76888	4.98876	4.52907	4.81124	4.71237	4.5413	6.57038	4.6507	4.50335	5.12093	5.278	5.16668	5.18696	4.80274	5.27365	5.08897	4.98928	4.60707	4.91987	5.31218	5.05436	4.40305	5.22671	4.84479	5.43289	4.10234	4.34909	4.95649	4.90087	4.61855	5.50401	5.11434	4.12597	4.80884	5.70562	4.66776	4.69966	5.72271	5.34291	4.52372	4.76693	4.40093	5.31212	5.23334	4.1917	4.67673	5.29722
AHR	8.1138	8.18869	8.36574	7.57036	7.79811	5.91815	7.85835	7.79554	6.87294	7.7637	5.08831	8.39352	7.69696	7.80533	7.64456	8.33888	8.11736	7.95273	7.99455	7.45678	7.61335	7.7243	7.46795	8.2465	8.14424	8.15662	6.56064	7.97449	6.39909	7.5107	8.00699	7.66036	7.61552	7.50862	5.05033	8.00906	5.86912	7.73646	7.29623	6.24878	8.20602	5.57103	7.70236	7.813	7.13524	7.33571	7.15084	8.04263	5.77366
KLRC1	5.13277	5.90605	5.50886	5.80066	5.34465	4.69576	5.08677	5.65678	6.36392	4.72138	5.00585	5.32313	4.34692	5.70252	5.87044	5.51291	5.5813	5.52069	5.91655	6.21696	5.53977	5.52791	5.05436	4.84657	5.42602	4.84479	5.48535	6.06091	6.02986	5.2212	5.23616	5.41243	5.60355	5.62891	4.9862	5.27386	5.86912	5.47111	5.52044	6.32678	4.66556	5.70429	5.9927	5.09054	5.65607	5.66944	5.08372	4.67673	5.52855
IFI16	9.89084	9.4675	9.37015	9.1896	12.0068	11.2567	11.9401	9.81432	13.2484	10.1855	10.6275	9.88751	9.20153	9.49576	9.53506	9.3844	9.75123	9.77905	9.77121	11.599	9.59531	9.50264	9.73692	10.0846	11.697	9.37075	12.9445	9.60331	12.798	11.1393	9.56887	9.36197	12.4714	9.43007	11.9572	11.1092	12.4933	9.30595	9.22088	12.3351	8.97276	11.4153	10.0855	9.13201	12.2868	9.85841	12.6705	12.3318	11.9554
IL1RN	5.35208	5.81724	6.24583	5.97845	8.94321	9.70326	8.33252	5.3826	12.8705	5.651	8.52571	5.56192	6.03984	6.78225	5.51681	6.14094	5.81396	5.5696	6.12514	9.01992	5.0677	6.52791	5.76961	6.39546	9.4376	6.18519	11.9002	5.80457	12.1488	6.97727	5.89151	5.76293	10.608	6.17488	11.1805	6.85882	13.916	6.55203	6.14847	13.0151	6.75171	9.26069	7.21509	5.70721	10.0915	5.97877	11.3585	9.50829	10.3567
CD28	6.60584	6.69795	6.58686	6.15533	6.34465	4.81124	6.00188	6.29619	6.24845	6.9364	5.50335	6.9081	6.73172	6.37237	6.69266	7.03076	7.00084	7.00256	6.28268	6.05469	5.97149	6.42407	6.39924	6.50107	6.47182	6.72222	5.43289	7.06091	6.80245	6.91917	6.46882	6.73436	6.12292	7.1348	5.38475	7.03525	6.91975	6.79304	6.40678	6.07886	6.03951	5.78675	6.18909	6.41246	6.46966	6.3747	6.08372	6.30239	5.63164
CXCL1	4.91818	5.00551	4.76888	4.98876	4.5017	7.02966	4.66912	4.40249	6.24845	4.6507	6.3107	5.12093	5.14676	5.16668	5.18696	5.4458	5.27365	4.93512	4.98928	4.60707	4.91987	5.31218	5.05436	4.40305	4.71152	4.84479	4.75384	4.10234	6.57418	4.95649	4.90087	4.84539	5.69666	4.96171	6.75559	4.80884	7.01596	4.66776	4.69966	6.40078	5.18536	6.90223	4.76693	4.40093	4.65486	5.03353	4.1917	4.67673	8.82351
CASP8	9.61646	9.79852	9.61506	9.58931	10.0676	8.5074	9.45533	9.5413	9.64076	9.50524	8.28471	9.17513	9.31669	10.2543	9.52845	9.7099	9.21357	9.47489	9.00966	9.58718	9.62723	10.0825	9.67831	9.72649	10.0624	9.88563	9.40251	9.47699	10.0924	9.28585	9.37366	9.96087	9.98668	10.0308	8.81679	9.55474	8.96263	9.65026	9.4704	8.72271	9.67228	8.64474	10.5814	9.66746	9.42866	9.51002	10.1853	9.61775	8.88219
FASLG	4.91818	5.00551	4.87499	5.03985	4.5017	5.15519	5.41691	5.41577	4.20188	4.85263	4.48415	5.12093	4.34692	5.45254	5.18696	4.86083	5.27365	4.93512	4.98928	5.30622	5.63707	5.97269	5.36362	4.73554	4.71152	4.84479	4.75384	4.10234	4.34909	4.95649	5.40608	5.70521	5.98206	5.23298	5.8487	4.9607	6.01596	6.05608	5.43024	5.60242	5.61421	5.37172	5.53702	5.27111	4.65486	5.70047	5.39184	4.67673	5.41752
CD46	9.85784	10.2419	10.224	9.46425	10.0299	9.34442	10.1436	10.1609	11.032	10.1178	8.62574	10.0046	9.98566	10.3212	9.65976	9.65153	10.1767	10.0921	10.419	9.62237	10.2233	10.5001	9.9182	10.2119	9.92715	10.1145	10.3128	9.78439	11.1244	9.84048	9.97222	10.1003	10.076	10.227	9.03852	10.0091	10.3518	10.0949	9.44471	9.79653	10.0736	9.33451	10.1559	9.29217	10.0995	10.3369	9.79731	10.0766	9.2615
ITGAM	7.6777	7.79997	8.03938	8.11785	9.40485	10.2036	8.56111	7.49549	12.188	7.75113	10.1094	7.30133	7.68518	9.25432	7.68078	8.2284	6.90323	7.62271	7.7101	8.75513	8.26325	8.78843	7.84904	8.81619	9.03406	7.98037	10.6724	7.77419	10.6022	8.26462	7.28927	8.42589	9.37965	8.41968	10.8122	7.9824	10.5834	7.75936	7.76145	10.8926	8.94436	10.8202	9.86306	8.36355	10.2573	8.10008	10.518	8.99271	11.4103
GPR183	9.18432	9.56277	9.05043	8.85577	8.90481	6.64996	8.70568	9.33137	7.24845	9.28326	7.05793	9.44912	9.27014	8.59624	9.27762	9.01638	9.60145	9.54076	9.1112	8.33479	8.53977	9.09269	9.18379	9.08036	8.70064	9.33932	7.30735	9.75358	7.88784	9.09785	9.64045	9.21721	8.42458	9.57377	7.08136	9.52364	7.06177	9.30595	8.84673	7.16632	8.59867	6.82628	8.6269	9.18365	8.54832	9.24128	7.79993	8.89281	6.44609
GNGT1	4.91818	5.00551	4.76888	4.98876	4.5017	5.01769	4.66912	4.71122	4.20188	4.6507	4.72574	5.12093	5.14676	5.16668	5.18696	4.91146	5.27365	4.93512	4.98928	4.60707	4.91987	4.79429	5.05436	4.73554	4.71152	4.84479	4.75384	4.10234	5.90433	4.95649	4.90087	4.61855	4.67914	4.96171	4.12597	4.80884	5.96866	4.66776	4.69966	5.93684	5.18536	3.88692	4.76693	4.40093	5.41903	5.03353	4.1917	4.67673	3.97551
NUP107	6.64411	6.60815	6.63172	6.27932	6.07504	6.32025	6.51207	6.18515	6.94889	6.27158	6.39412	6.83915	6.11199	6.63541	6.26971	6.37541	6.5813	6.86238	6.55398	5.94777	6.20097	6.5868	6.06406	6.37708	6.42602	6.12748	6.23259	6.51729	6.99949	6.72934	6.30655	6.33843	6.31137	6.81795	6.17063	6.79895	6.55362	6.79304	6.33403	6.9615	6.26628	6.31727	6.59756	6.46905	6.3396	6.95324	6.30611	6.65031	6.26551
IFITM1	11.6519	10.9307	11.2	10.629	13.1027	13.7248	13.094	10.7045	15.6225	11.7448	13.3064	11.5026	10.736	12.3483	10.856	10.6964	10.8216	11.4404	10.7601	12.5397	10.7483	10.7599	11.7234	10.864	12.9677	11.3575	14.8644	10.6515	14.3208	12.6671	10.7078	10.8678	13.9307	11.0625	13.5046	12.7415	15.0726	10.697	10.5462	14.4924	9.97276	13.2279	12.7333	10.8614	14.518	11.081	14.5613	12.3258	13.4851
CD3G	8.58828	8.81151	8.7652	8.09393	7.99374	6.85227	8.32817	9.11873	7.98541	8.86434	6.78875	8.92007	8.40549	8.10728	8.50001	8.36636	9.02425	8.84262	8.45812	8.1381	8.39428	8.83371	8.6304	8.17383	8.34834	8.42566	7.37844	8.63464	7.17282	8.75171	8.7248	8.66036	7.87657	8.77296	6.50405	9.05073	6.45408	8.67756	8.43605	6.07886	8.04717	5.42418	8.05159	8.57166	8.36657	8.39381	7.88123	8.63737	6.79603
C8A	4.91818	5.00551	4.76888	4.98876	4.5017	4.81124	4.66912	4.5413	5.91141	4.6507	4.50335	5.12093	5.14676	5.16668	5.18696	4.96037	5.27365	4.93512	4.98928	4.60707	4.91987	4.79429	5.05436	4.40305	4.71152	4.84479	4.75384	4.10234	4.34909	4.95649	4.90087	4.84539	5.50401	4.96171	4.9862	4.80884	5.70562	4.66776	5.17649	5.83374	4.66556	5.00915	4.76693	4.40093	5.36657	5.03353	5.33526	4.67673	3.97551
CCR2	6.78092	6.26623	7.28379	7.16455	7.26026	6.72551	7.48886	6.71122	7.98541	6.9364	6.57659	6.83915	6.98326	7.22037	6.99074	7.2823	6.90323	6.78165	7.09712	7.61656	7.07929	7.56743	6.75593	6.93717	7.69099	6.44351	8.24785	6.8441	7.90433	6.79543	6.77221	7.28033	7.55464	6.61441	6.7747	6.81112	6.9925	7.32526	7.06101	7.18738	7.31781	6.82628	7.77406	6.76861	8.6173	7.30575	8.89108	7.76182	6.41752
TNFRSF4	4.91818	5.00551	4.76888	4.98876	4.5017	6.86569	4.66912	5.00073	5.91141	4.6507	5.98447	5.12093	4.34692	5.16668	5.18696	4.96037	5.27365	4.93512	4.98928	4.60707	4.91987	4.79429	5.05436	4.55111	4.71152	4.84479	4.75384	4.10234	5.90433	4.95649	4.90087	4.61855	4.67914	4.96171	6.6967	4.80884	6.58533	4.66776	4.69966	6.72271	4.66556	6.28926	4.76693	4.40093	4.65486	5.03353	5.21497	4.67673	8.28146
CD163	9.21134	7.73478	8.52083	8.46238	9.23395	11.4327	8.9	8.15109	10.7902	8.73633	11.8946	8.50264	7.30903	8.66936	7.74491	8.83811	8.04728	8.38381	7.77342	9.19764	8.07929	7.92784	7.41673	8.20542	9.5271	7.25424	10.8034	7.79451	9.71636	9.1577	8.36956	8.34789	9.46153	8.00742	10.1939	9.00642	8.61635	7.71319	8.08338	10.2613	8.45647	9.40473	9.22472	8.40765	10.5571	7.73834	11.105	10.0402	9.80984
EIF2AK2	7.76016	7.08789	7.01701	6.85861	10.8167	10.2944	10.4383	7.39096	11.7549	8.34588	9.47297	7.62179	7.03984	9.39284	6.77315	6.97234	7.07955	7.2096	7.08291	10.5708	7.10219	7.54781	8.01897	8.2002	10.9465	7.14212	11.1709	6.97449	11.531	9.73637	7.16216	7.10173	10.9146	7.01848	10.5069	9.65271	11.1157	7.21362	7.0459	11.2107	7.51835	10.3051	9.31162	6.48743	10.9166	7.73834	11.2247	11.0154	10.5016
CD53	10.7435	10.6254	10.908	10.7357	11.1408	11.4043	10.8897	10.0933	12.8508	10.5263	11.3819	10.3797	10.382	11.3909	10.4598	10.8381	10.1174	10.669	10.6535	10.8852	10.9313	11.0808	10.7924	11.0825	11.5196	10.9976	12.4182	10.6831	12.4866	10.64	9.92126	10.7726	11.0039	10.8164	11.0542	10.5171	11.8546	10.4832	10.3231	11.8051	10.9444	11.7861	11.5864	10.4125	11.7551	10.6387	12.1114	10.6822	12.2428
IL27	4.91818	5.00551	4.76888	4.98876	4.58566	7.16608	4.66912	4.76369	6.75095	4.6507	6.22216	5.12093	5.21387	5.16668	5.18696	4.80274	5.27365	4.93512	4.98928	4.60707	4.91987	4.79429	5.05436	4.40305	4.71152	4.84479	5.80728	4.10234	6.53236	4.95649	4.90087	4.61855	4.67914	4.96171	7.25469	4.80884	7.50471	4.66776	4.69966	7.10122	4.66556	7.07626	4.76693	4.40093	5.46966	5.03353	5.6914	4.67673	8.1487
ELK1	4.91818	5.00551	5.37456	5.11785	4.88522	7.68065	5.04495	4.86323	6.94889	4.91403	7.04767	5.12093	5.278	5.49102	5.18696	4.80274	5.27365	5.15456	5.67262	5.36281	5.0677	5.21596	5.05436	5.22096	4.71152	4.84479	4.75384	5.15821	6.61482	5.25291	5.37366	4.73436	5.65085	4.96171	8.46929	4.8705	8.08413	4.66776	4.69966	7.83374	4.66556	7.84565	4.76693	4.40093	5.93361	5.43128	5.39184	4.67673	8.31282
SMAD3	6.80814	7.49818	6.88737	6.81244	6.32816	7.3962	7.05551	7.22312	7.44484	7.11697	7.57659	7.29399	7.03984	6.45254	6.95174	7.10876	7.34684	7.40417	7.59462	6.61656	7.1796	6.94294	6.45108	7.27159	6.75722	7.11268	7.10426	7.45482	6.80245	7.13022	7.18102	6.71986	6.96344	7.02945	8.33413	7.4709	8.06177	7.55203	6.6855	7.55459	6.39182	8.32419	6.63655	7.36355	6.76143	7.32579	6.71377	7.09089	9.49476
HAVCR2	4.91818	5.00551	4.76888	4.98876	4.58566	6.45065	4.66912	4.71122	7.49637	4.6507	5.80103	5.12093	4.34692	5.16668	5.18696	5.2234	5.27365	4.93512	4.98928	4.60707	4.91987	4.79429	5.05436	4.67664	4.71152	4.84479	6.53598	4.10234	4.34909	4.95649	4.90087	4.94848	5.55464	4.96171	6.43366	4.80884	7.50471	4.66776	4.69966	6.47117	4.66556	6.07626	4.76693	4.40093	5.85961	5.03353	4.1917	4.67673	6.19993
OXER1	4.91818	5.00551	4.76888	4.98876	4.5017	6.01769	4.66912	4.40249	4.20188	4.6507	5.56224	5.12093	4.34692	5.16668	5.18696	4.80274	5.27365	4.93512	4.98928	4.60707	4.91987	4.79429	5.05436	4.40305	4.71152	4.84479	4.75384	4.10234	4.34909	4.95649	4.90087	4.61855	4.67914	4.96171	6.48097	4.80884	7.38369	4.66776	4.69966	6.20814	4.66556	6.61683	4.76693	4.40093	4.65486	5.03353	4.1917	4.67673	5.35862
TNFSF13	7.7391	6.62132	7.39205	7.92521	8.28182	7.9117	7.82167	7.47204	7.83341	7.44281	6.83725	7.19498	6.79884	7.78225	7.69856	7.40221	7.5355	7.26262	7.6046	8.34185	7.32296	7.6889	7.29908	7.35847	7.65173	7.08262	7.87767	7.416	7.57418	8.20102	7.37366	7.55811	8.35487	7.45266	8.6612	7.7618	6.81665	6.98013	7.77067	8.00959	7.99272	7.99187	8.42454	7.41246	9.04213	7.57215	8.79993	8.45767	7.97333
CD22	5.72489	6.00989	5.5716	6.03985	5.66658	6.94369	6.22427	6.81432	6.24845	5.72138	6.36133	6.07159	5.88373	6.22037	6.91167	5.86083	6.66877	6.36315	6.55398	5.66237	6.84143	6.28872	6.28961	6.92457	5.22671	6.90509	6.26296	6.82447	6.30288	5.42978	7.02276	5.94848	5.90611	6.80523	7.15613	5.77429	6.78969	6.79304	6.17649	6.93684	5.94436	6.84565	5.834	6.46905	5.85961	6.90077	5.39184	6.09089	7.48791
RARRES3	8.43954	7.71648	7.60197	6.96796	8.37306	10.5865	8.01818	7.05437	9.66348	8.70845	10.689	8.8034	7.41265	9.24309	7.39854	6.92384	7.4492	8.65706	7.05405	8.33479	7.16879	7.52791	7.45108	6.50107	8.84686	7.22701	10.5235	7.00968	9.19978	9.68063	7.12368	7.41243	9.20445	7.8677	9.40329	9.11843	10.9969	7.03746	7.14847	9.50092	6.61421	9.10868	8.58266	7.04163	10.5141	7.16825	10.4612	8.62432	10.2615
GZMM	4.91818	5.00551	4.76888	4.98876	4.5017	6.30062	4.66912	4.41577	6.18705	4.6507	5.75127	5.12093	4.34692	5.16668	5.18696	4.80274	5.27365	4.93512	4.98928	4.60707	4.91987	4.79429	5.05436	4.40305	4.71152	4.84479	4.75384	4.10234	4.34909	4.95649	4.90087	4.61855	4.67914	4.96171	6.17063	4.8705	6.01596	4.66776	4.69966	6.07886	4.66556	5.93876	4.76693	4.40093	4.65486	5.03353	4.1917	4.67673	8.05906
CX3CL1	4.91818	5.00551	4.76888	4.98876	4.5017	7.3962	4.66912	4.40249	4.20188	4.6507	6.47297	5.12093	4.34692	5.16668	5.18696	4.80274	5.27365	4.93512	4.98928	4.60707	4.91987	4.79429	5.05436	4.40305	4.71152	4.84479	4.75384	4.10234	4.34909	4.95649	4.90087	4.61855	4.67914	4.96171	7.35966	4.80884	7.21151	4.66776	4.69966	6.86022	4.66556	6.92061	4.76693	4.40093	4.65486	5.03353	4.1917	4.67673	8.81258
C7	4.91818	5.00551	4.76888	4.98876	4.5017	5.28072	4.66912	4.40249	4.20188	4.6507	4.87258	5.12093	4.34692	5.16668	5.18696	4.80274	5.27365	4.93512	4.98928	4.60707	4.91987	4.79429	5.05436	4.40305	4.71152	4.84479	4.75384	4.10234	4.34909	4.95649	4.90087	4.61855	4.67914	4.96171	5.73622	4.80884	5.76221	4.66776	4.69966	5.53829	4.66556	5.52372	4.76693	4.40093	4.65486	5.03353	4.1917	4.67673	5.4741
CD4	5.66659	5.67285	6.10447	5.72791	5.40878	6.1108	5.48104	5.7377	4.20188	5.82092	5.41024	5.8492	5.50933	5.16668	5.6199	5.83484	5.65169	5.83263	6.17958	5.52035	5.43544	5.88154	5.59628	5.37708	5.6011	5.72222	5.76546	5.63464	4.34909	5.89927	5.82112	5.61406	5.3971	5.59976	6.35966	5.9824	6.61635	6.0926	5.8336	5.53829	5.52932	5.97438	5.76529	6.91157	6.03794	5.81831	5.59829	4.67673	5.72786
IL3	4.91818	5.00551	4.76888	4.98876	4.5017	4.12887	4.66912	4.40249	4.20188	4.6507	4.48415	5.12093	4.34692	5.16668	5.18696	4.80274	5.27365	4.93512	4.98928	4.60707	4.91987	4.79429	5.05436	4.40305	4.71152	4.84479	4.75384	4.10234	4.34909	4.95649	4.90087	4.61855	4.67914	4.96171	4.8487	4.80884	6.30969	4.66776	4.69966	4.42073	4.66556	5.14039	4.76693	4.40093	4.65486	5.03353	4.1917	4.67673	5.23309
PTAFR	8.66473	8.83432	9.08579	8.48831	8.8625	8.6265	8.70568	8.41986	10.4317	8.48641	8.96278	8.20675	8.21387	9.39538	8.28548	8.99012	8.04728	8.71799	8.4415	8.02869	8.85834	9.12617	8.61533	9.23379	8.97167	9.25424	8.77603	8.32813	10.3578	8.42631	8.52526	9.02124	8.97278	9.25885	9.34375	8.44378	8.62401	8.99949	8.13426	9.16632	9.50729	9.3583	9.90359	9.48285	9.45403	8.67726	9.44963	8.59115	9.92341
IL20	4.91818	5.00551	4.76888	4.98876	4.5017	4.28072	4.66912	4.40249	4.20188	4.6507	4.48415	5.12093	4.34692	5.16668	5.18696	4.80274	5.27365	4.93512	4.98928	4.60707	4.91987	4.79429	5.05436	4.40305	4.71152	4.84479	4.75384	4.10234	4.34909	4.95649	4.90087	4.61855	4.67914	4.96171	5.28166	4.80884	6.64673	4.66776	4.69966	4.42073	4.66556	5.52372	4.76693	4.40093	4.65486	5.03353	4.1917	4.67673	3.97551
CSF1R	8.2366	7.45467	8.26967	8.07938	8.21614	6.64996	8.92903	8.20426	7.24845	8.07726	6.63263	8.22617	7.61242	7.44276	7.85468	8.50056	8.18419	8.1015	8.78664	8.18593	8.66425	7.8418	7.94255	8.80593	8.47744	7.67264	8.10426	7.49262	6.35179	8.80616	8.25408	8.0447	8.11451	7.57751	6.30813	8.3551	4.31028	7.79304	7.95986	5.88621	7.65485	6.00915	8.17592	8.68747	8.35987	8.66552	8.79469	8.65674	5.23309
TBXA2R	4.91818	5.00551	4.76888	4.98876	4.5017	6.83872	4.66912	4.71122	6.36392	4.6507	6.18517	5.12093	4.34692	5.16668	5.18696	4.80274	5.27365	4.93512	4.98928	4.60707	4.91987	4.79429	5.05436	4.40305	4.71152	4.84479	4.75384	4.10234	4.34909	4.95649	4.90087	4.61855	4.67914	4.96171	6.79356	4.80884	6.38369	4.66776	4.69966	5.98575	4.66556	6.28926	4.76693	4.40093	4.65486	5.03353	4.1917	4.67673	7.76235
IL2RA	4.91818	5.00551	4.76888	4.98876	4.5017	10.8531	4.66912	4.40249	12	4.72138	10.8048	5.12093	4.34692	5.16668	5.18696	4.80274	5.27365	4.93512	4.98928	4.60707	4.91987	4.79429	5.05436	4.40305	4.71152	4.84479	4.75384	4.10234	4.34909	4.95649	4.90087	4.61855	4.67914	4.96171	6.75559	4.80884	5.45408	4.66776	4.69966	9.21841	4.66556	9.69898	4.76693	4.991	5.31212	5.03353	4.1917	4.67673	8.32825
IL13RA1	7.69239	7.49818	7.71049	7.38562	8.59258	7.35873	8.55367	7.08562	9.69691	7.47373	7.33624	7.11391	7.3243	8.9013	7.0657	7.88003	6.91759	7.5696	8.09712	8.01992	8.43544	8.27087	7.80324	8.78865	8.82497	8.20626	9.41609	6.86346	9.6833	7.64821	7.06398	8.12942	9.01858	8.35574	8.05815	7.62367	8.63919	7.37059	7.01521	8.65629	8.07738	8.41125	9.03709	7.09054	9.17773	8.27	9.27637	8.20051	7.7044
PTPN2	7.88366	8.09263	8.44327	7.85861	9.15435	9.83361	8.48886	7.96756	11.7589	7.9944	9.66993	7.9693	7.79884	8.95045	7.90147	8.04783	8.34152	7.80226	8.54882	8.52035	8.05014	8.07908	8.23151	8.28644	8.8727	8.11268	11.0606	7.80457	10.9879	8.44702	8.12855	8.07919	9.11028	8.11434	10.9029	8.14993	10.8083	8.08356	8.02294	10.9947	7.96066	10.3362	8.80434	7.82027	10.1605	8.16825	9.84875	9.43542	10.2555
LTB	6.99742	7.17981	6.99429	7.05975	7.34465	5.19826	6.44934	6.31389	7.96727	6.95112	5.04767	6.9554	6.75444	7.29837	7.0657	6.56127	6.61693	7.26262	6.72848	6.81212	6.74286	7.44544	6.74213	7.1251	6.42602	6.92216	7.18579	7.58884	7.90433	6.71803	6.74712	6.80475	6.62739	7.28884	6.1992	6.9607	6.70562	7.16299	6.66587	6.47117	7.31781	6.17142	7.54729	7.05401	7.004	6.60531	6.75749	6.93042	6.09559
CCR5	6.1752	5.00551	6.4264	6.24496	5.37707	8.65769	6.52734	6.67058	9.08134	6.19943	7.3107	5.43416	5.21387	5.41302	6.47616	6.03076	5.71881	5.87216	6.37889	6.56926	6.45336	6.24062	6.21161	6.30113	6.73861	5.68269	6.70037	6.49262	6.30288	6.28393	6.42203	6.51677	6.01858	5.27046	7.29496	6.22009	6.23169	5.89996	6.49842	7.47117	5.73285	8.43701	4.76693	6.48743	7.2841	6.78974	7.15084	6.7256	7.46016
EOMES	6.27613	5.88436	6.87499	6.43978	5.20715	4.63436	5.88822	6.41577	4.20188	6.01557	4.72574	6.23387	5.92437	5.16668	6.76192	6.56127	6.28174	6.55753	6.46909	5.9103	7.05602	6.19087	6.78315	6.66154	5.6011	6.66252	4.75384	6.30707	6.02986	5.3732	6.6557	7.12393	5.45154	5.89195	5.11173	6.04559	5.5212	6.67756	7.07596	4.42073	5.87724	4.78675	5.45213	7.09054	5.51857	6.57215	5.27637	4.67673	5.63164
NFKBIA	8.9615	9.18426	8.40932	8.81829	9.38506	11.3569	8.94617	8.52998	13.2555	8.63741	11.3916	8.66512	8.22205	9.26268	8.42725	8.58096	8.62132	9.007	8.46909	8.65105	8.30826	9.18453	9.2216	9.07752	8.62664	9.1201	10.874	8.46753	12.112	8.85605	8.30655	8.7235	9.25125	9.35138	12.6618	8.69767	13.3268	8.29424	8.48167	12.9706	8.75171	11.5063	10.0224	8.51456	10.0649	8.68891	9.68293	9.03278	12.5105
TGFB1	9.3358	9.19752	9.57734	9.42835	9.40485	9.24008	9.71571	9.56182	9.63503	9.30348	8.69646	9.37451	9.61553	9.13791	9.41476	9.53124	9.48096	9.3369	9.64144	9.4665	9.70409	9.79261	9.61723	9.78517	9.5513	9.58691	9.21327	9.442	9.57932	9.55271	9.51414	9.50835	9.80257	9.30924	9.10797	9.58873	8.71998	9.9406	9.36783	9.23367	9.68214	9.5855	9.21831	9.78542	9.20039	9.62364	9.26126	9.95409	9.44962
TP53	6.27613	6.16189	6.16675	5.59785	5.95131	7.32025	5.6854	6.16579	6.47084	6.40588	6.76387	6.26424	6.03984	5.97101	6.02871	6.30141	5.95982	6.4956	6.20606	5.66237	5.84143	6.13934	5.68554	6.51794	5.99538	5.90509	5.678	6.06091	6.25225	6.18878	6.43779	6.26043	5.98206	6.428	7.56019	6.20171	7.40162	6.05608	6.03064	6.66382	5.69438	7.04309	5.57766	6.79836	6.44457	6.25441	5.90086	6.09089	7.59384
CDC42	11.3515	12.0903	12.1157	11.4647	12.1155	11.3402	11.9719	11.392	12.2662	11.316	11.1775	11.5695	11.219	12.2403	11.5375	11.6417	11.499	11.4408	11.7461	11.7917	11.8126	11.5898	11.7181	11.776	11.9486	11.7666	11.933	11.1474	12.0752	11.0896	11.2401	11.797	11.8388	11.9716	11.1679	11.5443	12.2718	10.9728	11.3379	11.9782	11.0443	11.6936	12.038	11.08	11.8831	11.8759	11.9877	11.4438	11.3359
PLAUR	4.91818	5.08789	4.76888	5.51378	5.58566	8.80429	4.71237	4.5413	10.4416	4.651	9.0732	5.12093	4.34692	5.63541	5.18696	5.30141	5.27365	4.93512	4.98928	5.52035	4.91987	5.48726	5.28961	5.67664	4.71152	4.84479	7.76546	4.80457	7.17282	4.95649	4.90087	5.21979	4.67914	5.07252	8.39714	4.80884	7.91975	4.66776	4.69966	8.70091	4.66556	8.80665	5.96232	4.40093	7.31212	5.03353	5.39184	5.70094	7.32825
CD82	7.14883	7.95371	7.64636	7.29619	7.99374	9.29815	7.14731	6.62876	10.4383	6.95842	9.60838	6.85919	6.84191	8.03751	6.97137	7.7814	6.66877	7.28476	6.78225	7.1218	7.40813	7.7503	7.58085	7.51794	7.73861	7.79817	8.32905	7.264	8.84578	6.34405	6.45339	7.5983	7.01858	8.01296	10.0425	6.85882	9.67279	7.75936	7.14847	9.82705	7.97678	9.96998	8.58266	7.53237	7.60036	7.38429	8.54315	6.97224	10.7793
ITGA5	9.14216	9.15738	9.39422	9.3974	9.36095	8.29567	9.1863	8.44819	9.92087	8.49649	8.70302	8.35523	8.50264	9.96419	8.93934	9.71526	8.35213	9.05288	8.51745	9.2697	9.27338	9.32088	9.1185	9.63278	9.68857	9.86592	9.45279	8.63464	9.96453	8.1598	8.73441	9.59433	9.44149	9.89645	9.61158	8.80505	8.61635	9.05144	8.95986	8.2286	9.66732	9.92289	10.3325	9.49426	9.75888	9.0407	10.4193	9.07658	10.0121
CD97	7.92155	8.68545	8.19193	8.04983	8.99374	9.09948	7.91748	7.40755	11.0144	7.38976	9.21988	8.11391	8.03057	9.18267	7.68078	7.98422	7.9318	7.45712	7.23205	8.38347	7.40813	7.4348	7.62665	7.91823	8.66164	8.8615	9.49498	7.81455	10.4421	7.42978	7.76598	8.09613	8.97743	8.63969	9.83055	7.84112	9.85943	7.86871	7.48727	9.97972	8.15026	9.53569	9.85895	8.77236	9.55419	7.34555	9.56792	7.9619	9.73076
FCGR2B	10.7514	11.2334	10.7035	11.4264	12.2813	11.7218	11.729	10.0438	13.4033	10.5139	11.9049	9.89602	10.3965	11.8453	10.8118	10.6837	9.87224	10.5719	10.6523	11.7419	10.5953	11.4573	10.736	11.3684	11.7636	11.0216	12.962	10.97	13.3195	11.1949	10.0614	10.9099	12.623	11.4347	12.5567	10.8314	12.7518	10.6985	10.8854	12.7806	11.7581	12.5877	12.5264	10.5673	12.6801	10.3233	12.6956	12.239	12.8441
PMCH	4.91818	5.00551	4.76888	4.98876	4.5017	4.12887	4.66912	4.40249	4.20188	4.6507	4.48415	5.12093	4.34692	5.16668	5.18696	4.86083	5.27365	4.93512	4.98928	4.60707	4.91987	4.79429	5.05436	4.40305	4.71152	4.84479	4.75384	4.10234	4.34909	4.95649	4.90087	4.61855	4.67914	4.96171	4.12597	4.80884	4.31028	4.66776	4.69966	4.42073	4.66556	3.88692	4.76693	4.40093	4.65486	5.03353	4.1917	4.67673	3.97551
MBL2	4.91818	5.00551	4.76888	4.98876	4.5017	4.91815	4.66912	4.40249	4.20188	4.6507	5.27594	5.12093	4.34692	5.16668	5.18696	4.80274	5.27365	4.93512	4.98928	4.60707	4.91987	4.79429	5.05436	4.61524	4.71152	4.84479	4.75384	4.88257	4.34909	4.95649	4.90087	4.61855	4.67914	4.96171	5.8487	4.80884	6.84313	4.66776	4.69966	5.72271	4.66556	6.28926	4.76693	4.40093	4.65486	5.03353	4.1917	4.67673	5.16598
CCR6	5.31461	5.16189	5.47644	5.26224	4.52907	6.1108	4.91168	5.51092	5.98541	5.05699	5.53309	5.4072	5.45488	5.16668	5.25377	5.37541	5.27365	5.30656	4.98928	4.60707	5.0677	6.0859	5.05436	5.22096	5.3298	5.37075	4.75384	5.33508	4.34909	4.95649	5.27178	4.89786	5.55464	5.96234	6.9862	5.27386	6.9925	6.0926	5.2834	6.40078	5.73285	6.80665	4.76693	5.57596	4.65486	5.5382	4.1917	4.67673	5.63164
FOS	12.2712	12.1204	9.72091	11.764	13.1561	9.39157	11.6905	11.4612	10.9256	11.6127	9.0732	11.1535	9.67628	11.8309	9.93184	11.6982	10.0859	12.5224	9.59712	12.2389	9.79299	10.9662	10.2241	12.6039	12.7604	11.6174	10.3715	11.8701	11.8522	12.2366	11.9813	10.9147	12.5449	11.9868	11.5048	13.2904	8.64673	11.428	9.9679	10.8136	12.6595	10.0824	12.8582	11.7653	12.465	11.0766	11.9992	12.5912	9.77648
CSF2RB	6.22655	6.63438	6.44327	6.72791	7.4166	8.18761	6.49664	5.65678	9.27819	6.13642	7.80713	5.7878	5.75444	8.30379	6.22135	6.07585	5.27365	6.24767	5.81701	7.52035	5.6681	6.48726	6.06406	6.50107	7.4605	7.00462	8.4659	6.442	9.59971	6.56223	5.52894	6.28033	8.33328	6.87987	8.74594	6.3257	8.94441	6.67756	5.86836	8.75128	7.00849	8.37172	8.16929	7.18365	8.85961	5.90077	8.33526	7.35075	8.94859
CDKN1A	6.76016	7.43988	6.9712	6.32936	8.00934	8.19295	7.8523	6.52619	7.70788	6.89892	8.02167	7.34461	6.36915	7.75089	6.18818	7.03076	6.97362	7.01144	6.83409	7.58123	6.65267	6.54781	6.41673	7.22096	7.40256	6.95571	7.59686	6.36256	7.22626	7.77374	6.80905	6.61406	7.85653	7.44449	8.71165	7.49374	8.10616	6.16299	6.25741	7.97367	6.57239	8.5177	7.39642	6.89789	7.75123	6.66944	7.30611	7.7256	9.52855
KNG1	4.91818	5.00551	4.76888	4.98876	4.5017	4.12887	4.66912	4.40249	4.20188	4.6507	4.48415	5.12093	4.34692	5.16668	5.18696	4.80274	5.27365	4.93512	4.98928	4.60707	4.91987	4.79429	5.05436	4.40305	4.71152	4.84479	4.75384	4.10234	4.34909	4.95649	4.90087	4.61855	4.67914	4.96171	4.12597	4.80884	4.31028	4.66776	4.69966	4.42073	4.66556	3.88692	4.76693	4.40093	4.65486	5.03353	4.1917	4.67673	3.97551
CSF2	4.91818	5.00551	4.76888	4.98876	4.5017	4.63436	4.66912	4.40249	4.20188	4.6507	4.56224	5.12093	4.34692	5.16668	5.18696	4.80274	5.27365	4.93512	4.98928	4.60707	4.91987	4.79429	5.05436	4.40305	4.71152	4.84479	4.75384	4.10234	4.34909	4.95649	4.90087	4.61855	4.67914	4.96171	5.43366	4.80884	6.19105	4.66776	4.69966	5.60242	4.66556	5.20179	4.76693	4.40093	4.65486	5.03353	4.1917	4.67673	3.97551
CCRL1	4.91818	5.00551	4.76888	4.98876	4.5017	4.12887	4.66912	4.40249	4.20188	4.6507	4.48415	5.12093	4.34692	5.16668	5.18696	4.80274	5.27365	4.93512	4.98928	4.60707	4.91987	4.79429	5.05436	4.40305	4.71152	4.84479	4.75384	4.10234	4.34909	4.95649	4.90087	4.61855	4.67914	4.96171	4.12597	4.80884	4.31028	4.66776	4.69966	4.42073	4.66556	3.88692	4.76693	4.40093	4.65486	5.03353	4.1917	4.67673	4.77366
IL28A	4.91818	5.00551	4.76888	4.98876	4.5017	7.02966	4.66912	4.40249	4.20188	4.6507	5.82527	5.12093	4.34692	5.16668	5.18696	4.80274	5.27365	4.93512	4.98928	4.60707	4.91987	4.79429	5.05436	4.40305	4.71152	4.84479	4.75384	4.10234	4.34909	4.95649	4.90087	4.61855	4.67914	4.96171	7.03457	4.80884	6.94441	4.66776	4.69966	6.47117	4.66556	5.90223	4.76693	4.40093	4.65486	5.03353	4.1917	4.67673	7.88219
PAX5	4.91818	5.00551	4.76888	4.98876	4.5017	4.12887	4.66912	4.95634	4.20188	4.6507	4.48415	5.12093	4.34692	5.16668	5.18696	5.00768	5.27365	4.93512	4.98928	4.60707	4.91987	4.79429	5.05436	4.40305	4.71152	4.84479	4.75384	4.10234	4.34909	4.95649	5.37366	4.99739	4.67914	4.96171	4.12597	4.80884	4.31028	4.66776	4.69966	4.42073	4.66556	3.88692	4.76693	4.93853	4.65486	5.03353	4.1917	4.67673	3.97551
CD79A	6.91843	6.49818	6.71745	6.88115	6.15201	6.41458	6.73884	7.20426	6.36392	6.52874	6.06813	7.01913	6.70864	6.39284	7.41297	6.56127	7.4492	7.2096	7.15262	6.52035	6.85497	6.83371	7.38154	6.89903	6.35446	7.12748	5.678	7.42906	6.19978	6.66008	7.51414	6.48282	6.08897	7.07252	7.0025	6.81112	7.01596	7.05608	6.74283	6.20814	6.31781	6.6392	6.16262	7.46905	5.69914	7.30575	5.39184	6.70094	6.92341
SYK	9.63368	9.24084	9.51884	9.87975	10.1833	9.61661	10.1424	9.10862	11.343	9.26718	9.52201	8.75876	8.97361	10.3024	9.52845	9.68466	8.99409	9.43089	9.27019	9.99999	10.0023	10.1179	10.1238	10.1564	10.1792	9.70999	10.6864	9.11038	10.9408	9.29349	9.12368	9.87186	9.97975	9.84304	9.99234	9.31077	10.1833	9.19274	9.47605	10.403	9.85125	9.9455	10.5562	8.8596	10.3848	9.69855	10.6744	9.89553	9.79325
CD2	7.16997	7.10675	7.10447	7.24496	6.8739	5.57023	6.99091	7.62167	4.20188	7.13642	4.67327	7.21066	6.66133	6.45254	7.71029	6.71169	7.3679	7.15456	6.96385	7.18593	6.97149	6.69783	7.39924	6.50107	6.68127	7.75117	5.92593	7.64587	6.48929	6.98673	7.35717	7.1349	6.67394	7.12461	5.65605	7.23824	5.96866	6.99949	7.32154	5.60242	6.48492	5.42418	6.63655	7.3931	6.46966	7.00386	5.6914	7.23528	5.29722
LILRA3	6.14349	6.55421	6.28379	7.76474	7.85676	8.38226	7.06601	6.39928	10.743	5.39516	8.13755	5.76674	6.61242	7.843	6.84938	6.73998	6.28174	5.87216	6.49078	7.58123	6.47106	7.92022	6.6999	7.72104	7.18607	6.55716	9.98406	6.80457	9.9606	6.13873	6.27178	6.76293	8.01858	6.72652	9.35014	5.7492	9.16505	6.74795	7.09076	9.5218	8.29228	9.22785	8.96616	5.96501	8.19664	6.35534	8.71931	8.04263	8.95357
RIPK2	6.50131	7.215	6.75847	6.8472	8.2646	8.27571	7.07642	6.83898	9.52767	6.23596	7.92961	6.72367	6.61242	8.03751	6.66881	6.56127	6.70232	6.18627	6.23205	7.54501	6.11351	6.86578	6.97242	6.72104	7.82055	6.70259	8.47241	6.61192	9.72102	6.83787	6.61467	6.69042	8.31137	7.14493	8.44563	6.9607	9.22667	6.4431	6.66587	9.08448	6.55101	7.71486	7.98516	6.27111	8.66153	6.21197	8.55559	8.22666	8.27351
GZMA	6.31461	5.00551	7.93587	6.71541	4.58566	5.1108	7.41691	5.34865	4.20188	6.7885	6.00585	6.63347	5.278	5.16668	6.70443	6.79495	5.27365	6.55753	8.32556	6.36281	8.18497	5.31218	6.86187	7.89258	6.17226	4.84479	6.56064	6.72211	4.34909	6.20508	4.90087	7.72713	4.67914	4.96171	5.05033	6.39204	5.70562	4.66776	7.1054	4.42073	4.66556	6.66122	4.76693	6.92511	5.41903	7.66944	5.82069	4.67673	5.23309
PRKCD	8.16734	7.91678	8.13075	8.45864	8.94591	8.28072	8.61926	7.58569	9.73495	7.7637	8.0425	7.33033	7.48236	8.64823	7.98592	8.29188	7.39893	7.59345	7.7101	8.51412	8.04424	8.79677	8.17611	8.5755	8.85984	8.41364	9.1937	8.31412	9.30288	8.14297	7.64215	7.97925	8.78412	8.00742	8.79823	7.71072	8.38369	8.03746	7.94365	9.10676	8.82031	8.88829	9.13905	7.84186	8.7866	7.81122	9.17118	8.93042	9.12239
CR1	6.89957	6.49818	6.26493	6.98887	6.66658	6.28072	6.12741	6.51092	7.83341	6.68662	6.10821	6.9554	6.48236	7.17383	6.90147	6.71169	6.48819	7.0721	6.4247	6.70676	6.50582	6.86578	6.72819	6.66154	6.4491	7.25424	5.92593	7.24935	6.14534	6.2685	6.32362	6.17797	5.82594	6.99628	6.38475	6.77429	6.86912	6.32526	6.86836	6.75128	6.12878	6.97438	6.4301	6.31293	5.89708	6.63773	5.54938	6.42792	6.63164
IL12A	4.91818	5.00551	4.76888	4.98876	4.5017	4.12887	4.66912	4.40249	4.20188	4.6507	4.48415	5.12093	4.34692	5.16668	5.18696	4.80274	5.27365	4.93512	4.98928	4.60707	4.91987	4.79429	5.05436	4.40305	4.71152	4.84479	4.75384	4.10234	4.34909	4.95649	4.90087	4.61855	4.67914	4.96171	4.12597	4.80884	4.31028	4.66776	4.69966	4.42073	4.66556	3.88692	4.76693	4.40093	4.65486	5.03353	4.1917	4.67673	3.97551
MAP2K1	7.77748	7.19752	7.71049	7.44735	7.57871	8.21409	7.89412	7.37419	8.33591	7.7427	8.32352	7.46718	7.21387	7.54687	7.49663	7.6901	7.71881	7.7071	7.88413	7.36281	7.80001	7.73302	7.3726	8.00457	7.7756	7.44351	7.77603	7.34889	7.37563	7.88921	7.39805	7.52513	7.49107	7.63611	7.58205	7.76806	7.5375	7.40003	7.14847	8.12325	7.52932	8.40473	7.6269	7.34352	8.13524	7.70812	8.19125	7.89824	8.12239
TAL1	4.91818	6.90605	6.60197	6.8472	6.42438	7.41458	6.26126	6.3826	7.24845	5.05699	5.96278	5.20284	5.79884	6.28748	6.54328	5.66819	6.04074	5.59345	6.20606	7.83229	5.84143	5.91257	5.92433	6.2002	6.49419	6.8347	5.80728	6.56538	7.87116	5.18878	5.95863	5.97315	7.1396	6.07252	7.45751	5.20171	8.29058	6.29424	6.99961	8.11228	6.06989	7.14039	6.18909	5.46905	4.65486	6.14588	5.33526	6.62432	8.35109
UBE2L3	8.40207	8.78541	9.09916	8.84434	9.07504	9.60265	8.87336	8.75075	10.405	8.52382	9.34674	8.7264	8.56822	9.08544	8.99793	8.64219	8.95286	8.50506	8.89637	9.15422	8.78239	8.95417	8.80324	8.83651	9.11568	8.9264	9.61169	8.96107	9.85429	8.73497	8.68902	8.68296	9.0717	8.75324	9.23758	8.75866	9.87234	8.60988	8.91899	9.85364	8.50729	9.38501	9.03709	8.54559	9.56005	8.80052	9.47276	9.14674	9.25748
KLRG2	4.91818	5.00551	4.76888	4.98876	4.5017	4.12887	4.66912	4.40249	4.20188	4.6507	4.48415	5.12093	4.34692	5.16668	5.18696	4.80274	5.27365	4.93512	4.98928	4.60707	4.91987	4.79429	5.05436	4.40305	4.71152	4.84479	4.75384	4.10234	4.34909	4.95649	4.90087	4.61855	4.67914	4.96171	4.12597	4.80884	4.31028	4.66776	4.69966	4.42073	4.66556	3.88692	4.76693	4.40093	4.65486	5.03353	4.1917	4.67673	3.97551
IL17F	4.91818	5.00551	4.76888	4.98876	4.5017	5.32025	4.66912	4.40249	4.20188	4.6507	4.72574	5.12093	4.34692	5.16668	5.18696	4.80274	5.27365	4.93512	4.98928	4.60707	4.91987	4.79429	5.05436	4.40305	4.71152	4.84479	4.75384	4.10234	4.34909	4.95649	4.90087	4.61855	4.67914	4.96171	6.45751	4.80884	6.64673	4.66776	4.69966	5.53829	4.66556	6.54757	4.76693	4.40093	4.65486	5.03353	4.1917	4.67673	3.97551
CEBPB	9.27125	9.90605	9.23859	9.24496	10.4513	11.6524	9.56481	8.1755	13.7366	8.83884	11.7249	9.18707	9.25827	9.82052	8.73059	9.06191	8.694	9.25703	8.97159	10.0111	8.76097	9.594	9.26327	9.33723	10.1495	9.71734	12.1246	9.34889	13.0527	9.43325	8.02276	8.6062	10.4246	9.63969	11.7048	9.12576	11.8024	9.1843	8.67572	12.1375	9.99865	12.1961	11.2319	8.85607	12.2134	8.76793	11.9214	9.76182	12.6042
IL13	4.91818	5.00551	4.76888	4.98876	4.5017	5.1108	4.66912	4.40249	4.20188	4.6507	5.08831	5.12093	4.34692	5.16668	5.18696	4.80274	5.27365	4.93512	4.98928	4.60707	4.91987	4.79429	5.05436	4.40305	4.71152	4.84479	4.75384	4.10234	4.34909	4.95649	4.90087	4.61855	4.67914	4.96171	5.57116	4.80884	6.01596	4.66776	4.69966	5.98575	4.66556	5.37172	4.76693	4.40093	4.65486	5.03353	4.1917	4.67673	5.29722
PDCD1	4.91818	5.00551	4.76888	4.98876	4.5017	4.35873	4.66912	4.40249	4.20188	4.6507	4.67327	5.12093	4.34692	5.16668	5.18696	4.80274	5.27365	4.93512	4.98928	4.60707	4.91987	4.79429	5.05436	4.40305	4.71152	4.84479	4.75384	4.10234	4.34909	4.95649	4.90087	4.61855	4.67914	4.96171	5.65605	4.80884	6.5212	4.66776	4.69966	4.42073	4.66556	5.26069	4.76693	4.40093	4.65486	5.19028	4.1917	4.67673	3.97551
CCL11	4.91818	5.00551	4.76888	4.98876	4.5017	4.35873	4.66912	4.40249	4.20188	4.6507	4.48415	5.12093	4.34692	5.16668	5.18696	4.80274	5.27365	4.93512	4.98928	4.60707	4.91987	4.79429	5.05436	4.40305	4.71152	4.84479	4.75384	4.10234	4.34909	4.95649	4.90087	4.61855	4.67914	4.96171	4.8487	4.80884	4.31028	4.66776	4.69966	4.42073	4.66556	3.88692	4.76693	4.40093	4.65486	5.03353	4.1917	4.67673	4.77366
STAT5B	9.38973	9.46567	9.5639	9.56863	9.9062	8.75465	9.00733	8.8267	10.8778	9.20865	8.44195	8.83156	8.90926	10.455	8.93684	9.58291	8.493	9.35096	8.80407	9.51724	9.3254	9.8835	9.35457	9.72467	10.0206	9.85706	10.329	9.19306	11.3013	8.98437	8.82112	9.64317	9.52002	9.80364	9.41551	9.0787	9.3882	9.41813	8.8336	9.47546	10.281	8.90223	10.6908	9.21431	10.2447	8.89743	10.4396	9.83731	9.20829
CLEC5A	4.91818	5.00551	4.76888	4.98876	4.69257	6.69576	4.66912	4.40249	7.41837	4.6507	5.98447	5.12093	4.34692	5.16668	5.18696	4.80274	5.27365	4.93512	4.98928	4.60707	4.91987	4.79429	5.05436	4.40305	4.71152	4.84479	5.48535	4.10234	7.27779	4.95649	4.90087	4.61855	4.67914	4.96171	6.59286	4.80884	8.5375	4.66776	4.69966	8.82705	4.66556	8.24619	4.76693	4.40093	4.65486	5.03353	5.6914	4.67673	8.4741
SYT17	4.91818	5.00551	4.76888	4.98876	4.5017	4.12887	4.66912	4.40249	4.20188	4.6507	4.48415	5.12093	4.34692	5.16668	5.18696	4.80274	5.27365	4.93512	4.98928	4.60707	4.91987	4.79429	5.05436	4.40305	4.71152	4.84479	4.75384	4.10234	4.34909	4.95649	4.90087	4.61855	4.67914	4.96171	4.12597	4.80884	4.31028	4.66776	4.69966	4.42073	4.66556	3.88692	4.76693	4.40093	4.65486	5.03353	4.1917	4.67673	3.97551
VTN	4.91818	5.00551	4.76888	4.98876	4.5017	4.12887	4.66912	4.40249	4.20188	4.6507	4.48415	5.12093	4.34692	5.16668	5.18696	4.80274	5.27365	4.93512	4.98928	4.60707	4.91987	4.79429	5.05436	4.40305	4.71152	4.84479	4.75384	4.10234	4.34909	4.95649	4.90087	4.61855	4.67914	4.96171	4.12597	4.80884	4.31028	4.66776	4.69966	4.42073	4.66556	3.88692	4.76693	4.40093	4.65486	5.03353	4.1917	4.67673	3.97551
LILRB3	5.2366	5.42493	5.50886	5.86992	6.47018	8.73651	5.6854	5.08562	9.21807	5.08395	8.02691	5.12093	5.3983	5.99798	5.18818	5.30141	5.27365	5.44407	4.98928	6.44373	4.91987	6.16534	5.28961	5.92457	5.64174	5.72222	6.70037	5.15821	7.81994	5.15561	5.61467	5.17797	7.34051	5.79241	9.1042	5.8232	9.03905	5.67756	4.69966	8.6411	7.05478	8.77165	6.71152	5.18365	7.21159	5.03353	6.33526	6.23528	8.81806
TLR3	4.91818	5.00551	4.76888	4.98876	5.71811	7.64218	5.04495	4.40249	9.22573	4.6507	6.96278	5.12093	4.34692	5.16668	5.18696	4.80274	5.27365	4.93512	4.98928	5.61656	4.91987	4.79429	5.05436	4.40305	4.71152	4.84479	8.01785	4.10234	6.35179	4.95649	4.90087	4.61855	4.67914	4.96171	8.28166	4.80884	8.86912	4.66776	4.69966	8.43641	4.66556	7.12462	4.76693	4.40093	8.01256	5.03353	6.77887	5.74985	7.77366
THY1	4.91818	5.00551	4.76888	4.98876	4.5017	6.71071	4.66912	5.0438	5.98541	4.6507	6.06813	5.12093	4.34692	5.16668	5.18696	4.80274	5.27365	4.93512	4.98928	4.60707	4.91987	4.79429	5.05436	4.67664	4.71152	4.84479	4.75384	4.10234	4.34909	4.95649	4.90087	4.73436	4.67914	4.96171	7.11173	4.8705	7.17029	4.66776	4.69966	6.53829	4.66556	7.82628	4.76693	5.85607	4.65486	5.03353	4.1917	4.67673	7.02159
ITGA6	7.23158	7.38686	6.99429	6.13671	6.88522	6.55374	6.40043	6.78923	6.94889	7.42182	6.47297	7.58617	6.33941	7.02445	6.20486	7.23339	6.71881	7.29933	6.20606	5.9103	6.1796	6.84983	6.04169	6.24143	7.05678	7.02056	5.76546	6.24935	6.83721	7.4367	7.00169	6.64509	6.88648	7.428	6.01862	7.56736	5.58533	6.89996	5.9679	4.42073	6.89432	6.49947	6.9927	6.89789	7.19664	6.27516	6.62214	6.48682	6.94359
IKBKB	7.48874	7.42493	7.38333	7.43217	7.05514	6.87898	7.08677	7.25096	7.33591	7.22993	6.69974	7.10554	7.02123	7.26546	7.10177	7.55332	7.32546	7.43089	6.90043	6.74983	7.05602	7.62477	7.38154	7.44923	7.10118	7.43163	6.72239	6.80457	6.76682	7.16397	7.56528	7.54171	7.0717	7.72652	7.68664	7.30001	7.30969	7.29424	7.21751	7.28831	7.18536	7.31727	7.75646	7.40281	6.58896	7.29563	6.97681	7.18281	7.29722
BCL2L1	7.84146	10.5679	10.6509	10.7004	10.2668	8.0708	10.6803	9.3508	10.2409	8.32059	7.27594	9.15704	10.1786	10.1303	10.0995	9.97234	9.16024	8.15055	10.156	11.5496	10.2363	10.1734	9.80324	10.3852	10.174	10.7344	9.66952	10.3368	11.6335	8.61504	9.00434	9.42812	11.1795	9.39232	8.1992	8.62367	10.4038	10.0445	10.9477	9.83374	10.3599	8.36502	9.88144	9.40523	8.58322	10.4779	9.64851	9.80586	8.81806
TYROBP	11.2614	11.1506	11.6067	11.6236	11.6309	9.85731	11.501	10.8587	12.0834	10.888	10.4301	10.6736	11.2878	11.7919	11.2214	11.5134	10.7502	11.172	11.4928	11.3954	11.5398	12.2626	11.5475	12.0578	11.7114	11.5085	11.4594	11.1053	12.2287	10.8548	10.8241	11.8129	11.7002	11.5559	11.0562	10.9587	10.3949	11.3845	11.3402	10.2412	12.2192	11.0059	12.2862	11.1494	11.3988	11.2905	11.4719	11.8521	10.3994
CD74	12.6898	12.054	13.0968	12.5095	12.6557	9.89707	12.9469	12.6787	10.7694	12.5591	9.93658	12.7494	12.1932	12.4764	12.818	12.834	12.9046	12.6325	12.9298	12.6603	12.6517	12.4099	12.4978	12.7494	12.9878	12.5226	10.9307	12.7828	10.4756	12.9597	12.9165	12.7001	12.2886	12.562	10.4751	12.8718	9.7271	12.3982	12.4324	9.97367	12.1485	10.5282	12.6733	13.205	12.4716	12.8221	12.9599	13.067	10.5369
PTGER4	9.12196	8.95371	8.98567	8.38168	9.15901	8.55788	9.10469	8.67058	9.10643	8.97112	7.91838	9.25859	7.92437	8.68603	8.59797	8.82497	8.87409	9.19019	8.85932	8.43716	8.47983	7.91257	8.06406	8.84322	8.92715	8.90079	8.85791	8.97449	8.30288	9.13022	8.93104	8.47421	8.43812	9.08309	9.35649	9.41615	7.84313	8.27052	8.21076	8.48825	8.27934	8.96556	8.90758	8.58025	9.13131	8.68116	8.47931	8.84858	9.56482
RPS6KA5	7.08349	7.38686	7.65363	7.35374	8.34465	6.37759	8.08677	7.39928	7.27819	7.32907	5.84912	7.20284	7.5618	8.15598	7.22952	7.3481	7.48819	7.23256	7.63415	7.92915	7.76456	7.60591	7.74905	7.8861	8.19292	7.82565	7.13743	6.82447	7.48929	7.64223	7.42993	7.15659	8.79994	7.44449	5.88432	7.4241	6.78969	7.51214	7.01521	6.57071	7.57239	5.93876	8.1492	7.05401	7.61168	7.60531	7.96753	8.44287	6.63164
PIK3C2G	4.91818	5.00551	4.76888	4.98876	4.5017	4.12887	4.66912	4.40249	4.20188	4.6507	4.48415	5.12093	4.34692	5.16668	5.18696	4.80274	5.27365	4.93512	4.98928	4.60707	4.91987	4.79429	5.05436	4.40305	4.71152	4.84479	4.75384	4.10234	4.34909	4.95649	4.90087	4.61855	4.67914	4.96171	4.12597	4.80884	5.45408	4.66776	4.69966	4.42073	4.66556	4.93876	4.76693	4.40093	4.65486	5.03353	4.1917	4.67673	3.97551
NR3C1	7.97657	8.06878	8.25063	8.09393	8.19356	7.76901	7.94617	8.03848	9.55223	7.87596	7.8132	7.76674	7.9639	8.35162	7.81177	8.2871	8.00084	7.81753	8.07575	7.71765	8.14141	8.54286	8.434	8.484	8.05678	8.49005	7.678	7.77419	7.99949	8.01936	7.82712	8.39428	8.08897	8.18473	8.14148	7.8705	7.90726	8.25449	7.92726	8.24878	8.40379	8.02622	8.54729	7.7761	7.51857	8.10588	7.96753	8.33481	8.35109
BCL3	5.75318	5.59485	6.0831	5.75257	6.6534	6.71071	6.14731	5.24174	8.17128	5.37346	6.65985	5.29399	5.5618	6.81295	5.84938	6.30141	5.27365	5.81246	5.4247	6.56926	5.63707	6.31218	5.89967	5.97432	7.01098	6.18519	6.86782	5.54153	8.11732	5.48423	5.43779	6.15659	7.10605	6.23298	7.7166	5.27386	8.63162	5.85814	5.17649	7.88621	6.59345	7.05977	7.21509	6.96501	7.25553	5.39381	7.56177	6.23528	7.31282
LILRB4	4.91818	5.00551	4.76888	4.98876	4.5017	6.53706	4.66912	4.40249	5.91141	4.6507	5.89566	5.12093	4.34692	5.16668	5.18696	4.80274	5.27365	4.93512	4.98928	4.60707	4.91987	4.79429	5.05436	4.40305	4.71152	4.84479	4.75384	4.10234	6.19978	4.95649	4.90087	4.61855	4.67914	4.96171	6.79356	4.80884	6.61635	4.66776	4.69966	6.24878	4.66556	6.80665	4.76693	4.40093	4.65486	5.03353	4.1917	4.67673	7.63164
CCL16	4.91818	5.00551	4.76888	4.98876	4.5017	4.12887	4.66912	4.40249	4.20188	4.6507	4.48415	5.12093	4.34692	5.16668	5.18696	4.80274	5.27365	4.93512	4.98928	4.60707	4.91987	4.79429	5.05436	4.40305	4.71152	4.84479	4.75384	4.10234	4.34909	4.95649	4.90087	4.61855	4.67914	4.96171	4.12597	4.80884	4.31028	4.66776	4.69966	4.42073	4.66556	3.88692	4.76693	4.40093	4.65486	5.03353	4.1917	4.67673	3.97551
EGR2	6.87403	6.14375	7.18693	6.13671	7.99374	4.86569	7.93476	6.43207	5.91141	6.52874	4.91838	7.98306	6.33941	6.56502	5.22135	7.99599	6.46883	7.4956	6.7101	6.68474	4.91987	4.79429	5.05436	7.67664	7.66164	6.68269	6.13743	5.8441	6.53236	8.36959	7.44561	4.73436	7.98206	6.71298	6.40941	8.03005	6.76221	7.0926	4.69966	5.60242	8.05478	5.97438	7.36193	6.93853	7.31212	6.23334	7.52429	7.9619	3.97551
EBI3	4.91818	5.00551	4.76888	4.98876	4.5017	6.32025	4.66912	4.40249	5.91141	4.6507	5.69974	5.12093	4.34692	5.16668	5.18696	4.80274	5.27365	4.93512	4.98928	4.60707	4.91987	4.79429	5.05436	4.40305	4.71152	4.84479	4.75384	4.10234	4.34909	4.95649	4.90087	4.61855	4.67914	4.96171	6.67652	4.80884	6.94441	4.66776	4.69966	6.40078	4.66556	7.3583	4.76693	4.40093	4.65486	5.03353	4.1917	4.67673	7.04045
CFI	4.91818	5.59485	5.10447	5.19185	5.31148	5.19826	5.12741	5.16579	4.20188	4.68662	4.48415	5.13871	4.34692	5.49102	5.46236	4.80274	5.27365	5.27742	4.98928	5.41726	5.28343	5.48726	5.434	5.2616	5.22671	5.41966	4.75384	5.15821	4.34909	5.40177	5.30655	5.0905	4.67914	5.37737	5.61423	4.80884	6.84313	4.66776	4.69966	6.16632	4.66556	5.37172	4.76693	4.76861	4.65486	5.57215	4.1917	4.67673	4.86112
CCRL2	7.459	7.90066	7.90575	7.56341	9.52727	8.53286	8.62991	6.83898	10.1633	7.09725	7.82527	6.21844	8.10317	10.031	7.25377	7.71169	6.28174	7.01144	6.83409	8.65105	7.47983	9.00184	8.22656	7.72104	9.31102	7.87032	10.1251	6.95657	11.0504	7.78463	6.43779	7.70521	10.4297	8.31597	10.0909	7.6645	10.3564	8.18853	7.23093	9.80337	8.87294	9.64197	9.93326	7.40281	9.41258	7.30575	10.4496	8.41281	9.71618
LITAF	9.90352	10.3055	10.6132	10.7091	11.2026	11.1108	10.5731	9.28949	13.2997	9.53242	11.4633	9.15501	10.4091	11.3941	10.3821	10.3366	9.37832	9.91774	10.1338	11.097	10.3083	11.122	10.3386	10.8665	11.1783	10.8222	12.3922	10.4242	13.4859	9.7237	9.35302	10.2704	11.7363	11.0981	12.0761	9.61675	12.2109	10.8082	10.1555	12.1054	11.4877	12.3684	11.9406	9.95183	12.1279	9.85669	11.9883	10.9357	11.8624
GNB1	10.4182	10.5097	11.0028	10.5885	11.0132	10.8104	10.9596	10.4003	11.7837	10.3284	10.8971	10.1881	10.3893	10.9208	10.4335	10.8258	10.3822	10.4143	10.8095	10.8172	10.7947	11.0523	10.5544	11.091	11.24	10.7912	11.2611	10.5903	11.5177	10.5551	10.3798	10.746	11.2627	10.6199	11.1488	10.4496	10.9895	10.6364	10.5026	11.4331	11.1215	11.3709	11.0986	10.6026	11.0965	10.5721	11.5494	11.3348	11.7257
IFIT2	8.1001	6.46932	6.49274	6.70281	14.3087	13.5012	14.0182	6.71122	15.6578	9.24196	12.1187	7.45406	6.50933	11.048	6.11947	6.00768	5.78294	6.86238	7.00966	14.1827	7.0677	7.32377	9.12915	9.03419	14.2501	7.19927	15.8051	6.18923	15.5263	12.9749	6.54359	6.67546	15.2294	6.8677	13.7356	12.9053	15.3112	6.77067	6.72397	14.7528	7.63467	13.424	10.7925	5.8275	15.2325	8.1848	15.0696	14.3061	13.1791
TLR4	9.6933	9.92078	9.71745	9.60294	11.3078	10.8455	10.4056	8.87221	12.7837	9.54096	10.9317	8.83662	9.16383	11.5531	9.05424	9.67003	8.46883	9.50034	8.67736	10.7657	9.33025	10.3873	10.2228	10.1429	11.3802	10.2892	12.123	8.8294	13.1501	10.0501	8.78768	10.0227	11.7695	10.3036	11.2649	9.83815	12.0355	9.45717	9.14138	11.7845	10.3843	10.6571	11.6873	8.97806	12.2761	9.15151	12.3221	11.0016	10.9511
IFI35	4.91818	5.00551	4.76888	4.98876	6.40878	6.76901	5.97985	4.40249	9.01221	4.6507	6.45754	5.12093	4.34692	5.16668	5.18696	4.80274	5.27365	4.93512	4.98928	6.81212	4.91987	4.79429	5.05436	4.40305	6.66164	4.84479	7.48535	4.10234	7.88784	5.58732	4.90087	4.61855	7.35487	4.96171	6.90181	5.08623	7.43681	4.66776	4.69966	7.89904	4.66556	6.6392	5.86717	4.991	7.26989	5.03353	7.08372	6.16489	6.83975
TFRC	4.91818	5.00551	4.76888	4.98876	4.79211	4.91815	4.71237	4.40249	6.0558	4.6507	4.48415	5.12093	4.34692	5.16668	5.18696	4.80274	5.27365	4.93512	4.98928	4.60707	4.91987	4.79429	5.05436	4.84657	4.71152	4.84479	5.58489	4.10234	6.14534	4.95649	4.90087	4.61855	4.67914	5.23298	4.12597	5.16423	5.96866	4.66776	4.69966	7.14495	4.66556	5.20179	5.40773	4.40093	4.65486	5.03353	5.33526	4.67673	3.97551
CASP10	7.63653	7.16189	7.32079	7.42451	8.07009	8.66539	8.28391	7.77651	10.4016	7.73421	8.59081	7.51848	7.59993	8.73895	7.36925	7.53729	7.38866	7.43089	7.62437	8.44373	7.79299	8.19718	7.50112	8.01649	8.75722	7.21321	9.44287	7.24935	10.8221	7.95816	7.51414	7.85869	9.25508	7.33378	8.1042	8.04559	9.22667	7.67756	7.85975	8.53829	7.11428	8.66122	7.68386	7.69935	9.45717	7.97243	9.46289	8.26922	8.17454
IL18RAP	4.91818	5.00551	4.76888	4.98876	5.92961	9.00562	4.66912	4.40249	11.6928	4.6507	7.76387	5.12093	4.34692	6.41302	5.18696	4.80274	5.27365	4.93512	4.98928	5.9103	4.91987	5.48726	5.05436	4.40305	5.37871	4.84479	9.59089	4.10234	11.8156	4.95649	4.90087	4.61855	7.42458	4.96171	9.70419	4.80884	10.1007	4.66776	4.69966	10.5787	5.87724	8.72535	7.26572	4.40093	8.7665	5.03353	8.30611	4.67673	8.80708
PTK2	6.45038	6.63438	7.19692	7.15533	6.61314	6.1108	6.91168	7.08562	6.70788	6.82092	4.61882	6.6905	6.70864	6.76665	7.30108	6.82166	7.24806	6.83263	6.44706	7.34887	6.81395	7.04448	7.18124	6.72104	7.4376	7.58958	6.40592	7.33508	7.08875	6.63623	7.28055	6.71986	7.05421	6.75324	5.9862	6.7492	6.94441	6.89996	7.27046	6.03305	6.77033	6.34475	6.80005	6.85607	7.05462	6.48573	7.34962	7.25235	6.72786
CDH5	4.91818	5.00551	4.76888	4.98876	4.5017	4.28072	4.66912	4.40249	4.20188	4.6507	4.48415	5.12093	4.34692	5.16668	5.18696	4.80274	5.27365	4.93512	4.98928	4.60707	4.91987	4.79429	5.05436	4.40305	4.71152	4.84479	4.75384	4.10234	4.34909	4.95649	4.90087	4.61855	4.67914	4.96171	4.12597	4.80884	4.31028	4.66776	4.69966	4.42073	4.66556	3.88692	4.76693	4.40093	4.65486	5.03353	4.1917	4.67673	4.86112
CTSS	11.1762	11.1997	11.4443	11.3108	12.2824	11.0304	12.0877	11	12.961	10.9253	10.7505	10.7786	10.8419	11.9479	10.9597	11.2847	10.9788	11.0076	11.5495	11.7994	11.4885	11.7551	11.1844	12.135	12.1487	11.1421	12.1898	10.9407	12.3771	11.4376	11.1114	11.4758	12.3355	11.4789	11.8208	11.3473	12.1637	11.0514	11.0806	12.0301	11.8869	11.5848	12.5205	10.857	12.1352	11.5128	12.2002	12.4256	11.634
GTF3C1	5.93704	5.67285	5.8499	5.67728	5.61314	6.13317	5.60134	5.76369	7.15534	5.7885	6.10821	5.70165	5.5618	5.52849	5.43434	5.88637	5.27365	6.20187	5.63415	5.87182	5.86839	6.00184	5.53354	5.97432	5.51621	5.55716	6.10426	5.92005	6.65435	5.79543	5.49919	5.79094	4.67914	5.57002	7.12668	5.7492	7.23169	5.77067	5.8336	6.66382	6.34291	6.6392	5.86717	5.70721	6.39304	5.60531	6.30611	6.33481	6.6563
CD24	7.1001	6.74686	5.50886	7.36977	6.36095	5.06499	7.80297	5.9787	6.36392	7.00149	5.44195	7.07159	5.45488	6.50988	7.37663	5.86083	6.40912	7.47649	7.39048	7.03741	7.73556	4.79429	6.99588	7.79212	5.55928	8.05966	6.74409	7.56538	4.34909	6.63623	6.73441	5.48282	6.15609	7.36009	5.33413	7.16423	5.38369	5.72487	6.95178	7.10122	5.23981	5.82628	6.74758	5.09054	5.93361	8.00386	5.01333	6.20051	4.94359
CTNNB1	8.34513	8.3157	8.45164	8.15533	8.4127	8.25035	8.21487	8.38679	9.42504	8.19635	8.35718	8.21066	7.95411	8.59624	8.27762	8.37089	8.02756	8.2173	8.27019	8.20153	8.40353	8.83776	8.22656	8.72467	8.46617	8.23387	8.41271	8.40943	8.84578	8.4367	8.1669	8.47421	8.38316	8.43214	8.52677	8.15948	8.60092	8.3481	8.38894	8.48825	8.6895	8.96998	8.82136	8.18927	8.51857	8.4359	8.61622	8.79133	9.32825
C8G	4.91818	5.00551	4.76888	4.98876	4.5017	4.12887	4.66912	4.40249	4.20188	4.6507	4.48415	5.12093	4.34692	5.16668	5.18696	4.80274	5.27365	4.93512	4.98928	4.60707	4.91987	4.79429	5.05436	4.40305	4.71152	4.84479	4.75384	4.10234	4.34909	4.95649	4.90087	4.61855	4.67914	4.96171	4.12597	4.80884	4.31028	4.66776	4.69966	4.42073	4.66556	3.88692	4.76693	4.40093	4.65486	5.03353	4.1917	4.67673	3.97551
ICAM5	4.91818	5.00551	4.76888	4.98876	4.5017	5.94369	4.66912	4.40249	6.12292	4.6507	5.24031	5.12093	4.34692	5.16668	5.18696	4.80274	5.27365	4.93512	4.98928	4.60707	4.91987	4.79429	5.05436	4.40305	4.71152	4.84479	4.75384	4.10234	4.34909	4.95649	4.90087	4.61855	4.67914	4.96171	5.52677	4.80884	6.10616	4.66776	4.69966	5.66382	4.66556	6.00915	4.76693	4.40093	4.65486	5.03353	4.1917	4.67673	8.06828
IL23R	4.91818	5.00551	4.76888	5.07938	4.5017	4.12887	4.66912	4.5413	4.20188	4.6507	4.48415	5.12093	5.21387	5.16668	5.18696	4.96037	5.27365	4.93512	4.98928	4.60707	4.91987	4.79429	5.05436	4.40305	4.71152	4.84479	4.75384	5.33508	4.34909	4.95649	4.90087	4.61855	4.67914	4.96171	4.12597	4.80884	4.31028	4.66776	4.69966	4.42073	4.66556	3.88692	4.76693	4.64308	4.65486	5.03353	4.1917	4.67673	3.97551
BIRC2	8.48453	9.3157	9.10712	8.91432	9.56646	9.2062	9.19589	8.88115	10.405	8.44541	8.63606	8.53726	8.69696	9.349	8.78151	8.73296	8.87409	8.67114	9.01341	9.36973	9.06479	9.24368	9.02468	9.10849	9.12287	9.1781	10.3522	8.66255	10.3458	8.58421	8.64215	9.00339	9.57317	9.22585	9.78887	8.70747	10.3972	8.59722	8.71445	10.7689	8.84687	9.30333	9.51364	8.47827	9.27346	9.16547	9.33526	9.47232	9.91832
PDGFA	4.91818	5.00551	4.76888	4.98876	4.5017	6.45065	4.66912	4.40249	6.0558	4.6507	5.77636	5.12093	4.34692	5.16668	5.18696	4.80274	5.27365	4.93512	4.98928	4.60707	4.91987	4.79429	5.05436	4.40305	4.71152	4.84479	4.75384	4.10234	5.83721	4.95649	4.90087	4.61855	4.67914	4.96171	6.65605	4.80884	6.94441	4.66776	4.69966	6.63345	4.66556	6.61683	4.76693	4.40093	4.65486	5.03353	4.1917	4.67673	5.98312
TREM2	4.91818	5.00551	4.76888	4.98876	4.5017	5.75465	4.66912	4.40249	6.30734	4.6507	5.08831	5.12093	4.34692	5.16668	5.18696	4.80274	5.27365	4.93512	4.98928	4.60707	4.91987	4.79429	5.05436	4.40305	4.71152	4.84479	4.75384	4.10234	4.34909	4.95649	4.90087	4.61855	4.67914	4.96171	6.35966	4.80884	6.27122	4.66776	4.69966	6.07886	4.66556	6.26069	4.76693	4.40093	4.65486	5.03353	4.1917	4.67673	6.50158
KIR2DL4	4.91818	5.00551	4.76888	4.98876	4.5017	5.94369	4.66912	4.40249	4.20188	4.6507	5.12784	5.12093	4.34692	5.16668	5.18696	4.80274	5.27365	4.93512	4.98928	4.60707	4.91987	4.79429	5.05436	4.40305	4.71152	4.84479	4.75384	4.10234	4.34909	4.95649	4.90087	4.61855	4.67914	4.96171	6.01862	4.80884	6.14923	4.66776	4.69966	6.20814	4.66556	5.97438	4.76693	4.40093	4.65486	5.03353	4.1917	4.67673	5.90294
IRF5	6.11107	5.2994	6.39205	6.09874	6.54343	8.05331	7.04495	5.86323	8.20264	6.05699	7.35301	5.76674	6.00237	5.99798	5.69266	6.4458	6.4492	6.10565	6.40198	6.54501	6.09079	5.81741	5.92433	6.56741	7.11568	5.41966	8.42619	5.58884	7.99949	6.63623	6.08416	6.15659	7.52955	5.89195	8.70668	6.10613	8.90097	6.0926	5.64597	8.5787	5.94436	8.27504	6.16262	6.8275	7.77155	6.35534	8.4923	8.08136	8.76235
TNFSF8	7.3567	7.22367	6.83719	7.07938	7.7054	7.17689	7.65792	6.72452	8.3914	7.00855	6.41024	7.17113	6.63709	7.17383	6.88086	7.04216	6.66877	7.42426	6.61452	6.74983	6.86839	7.19087	6.6999	7.3205	7.08653	6.49005	8.13743	6.51729	7.95269	7.22919	6.86843	7.12393	8.4109	7.35138	7.83965	7.39204	7.55362	7.0186	6.58457	7.50512	7.19917	7.58261	7.6269	7.31293	7.83085	6.84632	7.76822	7.58443	7.78489
TRAF6	6.2565	5.98971	5.89965	6.22748	6.36095	5.63436	5.93476	5.91053	6.52147	5.86823	5.94075	6.18707	5.50933	6.79768	6.11947	6.2433	5.71881	6.32092	6.03941	6.21696	6.5229	6.54781	6.06406	6.11405	6.58034	5.90509	5.88745	6.06091	6.7303	6.06919	6.00169	6.29996	6.5793	6.41132	6.8487	5.43987	6.10616	6.32526	6.03064	5.72271	6.48492	6.23154	7.17592	6.87015	6.19664	5.97877	6.33526	6.57088	6.79603
MYL2	4.91818	5.00551	4.76888	4.98876	4.5017	5.15519	4.66912	4.40249	4.20188	4.6507	4.77636	5.12093	4.34692	5.16668	5.18696	4.80274	5.27365	4.93512	4.98928	4.60707	4.91987	4.79429	5.05436	4.40305	4.71152	4.84479	4.75384	4.10234	4.34909	4.95649	4.90087	4.61855	4.67914	4.96171	5.65605	4.80884	6.70562	4.66776	4.69966	4.42073	4.66556	4.61683	4.76693	4.40093	4.65486	5.03353	4.1917	4.67673	5.58102
TNFSF12	5.42423	5.42493	5.79837	5.95739	5.37707	5.50312	5.95748	5.76369	4.20188	5.16196	5.27594	5.56192	5.66133	5.16668	5.66881	5.86083	5.54478	5.68508	5.7101	6.05469	5.60536	5.64338	5.79657	5.92457	6.25318	5.7607	6.10426	5.58884	5.83721	6.05127	5.23616	5.81842	5.78412	5.30698	5.95304	5.37574	6.76221	5.85814	5.93548	5.72271	5.94436	6.66122	6.05159	6.43157	5.82113	5.92724	6.27637	5.88735	5.86112
CCBP2	4.91818	5.00551	4.76888	4.98876	4.5017	5.53706	4.66912	4.40249	4.20188	4.6507	4.82527	5.12093	4.34692	5.16668	5.18696	4.80274	5.27365	4.93512	4.98928	4.60707	4.91987	4.79429	5.05436	4.40305	4.71152	4.84479	4.75384	4.10234	4.34909	4.95649	4.90087	4.61855	4.67914	4.96171	6.22721	4.80884	6.61635	4.66776	4.69966	6.12325	4.66556	6.07626	4.76693	4.40093	4.65486	5.03353	4.1917	4.67673	5.16598
IL17RA	9.22907	9.19311	9.14371	10.0184	10.3125	9.71998	9.48886	8.71122	11.2142	8.72138	9.93101	8.3159	8.5358	10.0917	9.29914	9.67919	8.34152	8.87945	8.41905	9.81212	9.01739	9.87368	8.95757	9.70823	9.94553	9.04804	10.619	9.2785	10.721	9.17021	8.58312	9.65274	10.2455	9.5473	10.241	8.8705	10.117	8.92549	9.35256	10.3781	10.0357	10.2055	10.6245	9.70328	10.5717	8.83588	10.7012	10.1694	10.5729
CD3EAP	4.91818	5.00551	4.76888	4.98876	4.5017	4.12887	4.66912	4.60019	4.20188	4.6507	4.48415	5.12093	4.34692	5.16668	5.18696	4.80274	5.27365	4.93512	4.98928	4.60707	4.91987	4.79429	5.05436	4.40305	4.71152	4.84479	4.75384	4.10234	4.34909	4.95649	4.90087	4.61855	4.67914	4.96171	4.12597	4.80884	4.31028	4.66776	4.69966	4.42073	4.66556	3.88692	4.76693	4.40093	4.65486	5.03353	4.1917	4.67673	3.97551
IFNG	4.91818	5.00551	4.87499	4.98876	4.5017	4.63436	4.71237	5.27826	4.20188	4.6507	4.48415	5.12093	4.34692	5.16668	5.18696	4.80274	5.27365	4.93512	4.98928	5.56926	5.1579	4.79429	5.05436	5.22096	4.71152	4.84479	4.75384	5.33508	4.34909	4.95649	4.90087	4.61855	4.67914	4.96171	4.12597	4.80884	4.31028	4.66776	4.69966	4.42073	4.66556	3.88692	4.76693	4.40093	4.65486	5.03353	4.1917	4.67673	3.97551
IL6R	8.87725	8.88162	8.77189	9.03483	9.46265	7.8987	8.80923	7.91053	10.3605	8.63513	7.58372	8.05432	8.46869	9.57177	8.45889	8.98717	7.94588	8.71256	8.30121	8.97525	8.56883	9.52289	8.79657	9.3817	9.4114	9.07882	9.63219	8.52946	10.4136	8.3804	7.69559	8.67922	9.31871	9.10659	8.72153	8.34257	9.3701	8.86871	8.27695	8.82032	9.58296	8.55347	10.2311	9.25242	9.41581	8.28543	9.68858	9.00787	8.83436
TICAM1	4.91818	5.00551	4.76888	4.98876	5.0145	6.01769	4.66912	4.40249	6.79277	4.6507	5.20379	5.12093	4.34692	5.56502	5.18696	4.80274	5.27365	4.93512	4.98928	4.60707	4.91987	4.79429	5.05436	4.40305	5.22671	4.84479	5.678	4.10234	6.35179	4.95649	4.90087	4.61855	4.67914	4.96171	6.61423	4.80884	6.67648	4.66776	4.69966	6.03305	4.66556	5.70429	4.76693	4.40093	4.65486	5.03353	5.39184	4.67673	5.98312
GNAQ	9.4493	9.82296	9.81629	9.65619	9.79811	7.8319	9.28166	9.30727	9.93027	9.06378	7.72574	9.08867	9.15105	10.1944	9.4308	9.59264	9.45659	9.31196	9.10418	9.65955	9.51225	9.85583	9.61912	9.54495	9.82937	10.5476	9.12508	9.50809	9.90022	8.79274	9.18336	9.57432	9.6825	9.87075	8.03457	9.15948	8.5212	9.53886	9.22088	8.73707	9.76337	8.14039	10.4978	9.12909	9.43823	9.26223	9.71654	9.74684	8.22487
STAT3	9.43628	9.47296	9.59255	9.63645	10.6592	10.1442	10.0983	9.09844	11.8766	9.22237	9.88417	9.01019	9.30134	10.9418	9.17555	9.55332	8.94937	9.29933	9.21911	10.4633	9.40353	9.89908	9.74386	9.93088	10.6455	9.85928	11.1578	9.2045	11.7105	9.72228	9.02014	9.44585	11.124	9.86923	10.185	9.65271	10.9229	9.53554	9.19029	11.1341	10.2281	10.1187	11.0552	8.91157	11.1224	9.16547	11.1135	10.7241	10.3011
CD1D	5.60584	5.92743	5.99429	6.46984	6.59946	6.78322	6.06601	5.95634	7.36392	5.45835	6.29342	5.26424	4.34692	6.70252	6.08385	5.75392	5.87409	5.4176	4.98928	6.70676	5.84143	6.11287	5.79657	6.13607	6.49419	4.84479	7.03555	6.09408	6.80245	5.99613	5.69559	5.73436	6.15609	5.44449	7.8029	5.69767	7.45408	4.66776	6.35869	7.32678	6.23981	7.44972	6.67452	6.33339	6.54242	5.76059	7.03125	7.26922	7.92341
IL28B	4.91818	5.00551	4.76888	4.98876	4.5017	6.61859	4.66912	4.40249	5.91141	4.6507	5.69974	5.12093	4.34692	5.16668	5.18696	4.80274	5.27365	4.93512	4.98928	4.60707	4.91987	4.79429	5.05436	4.40305	4.71152	4.84479	4.75384	4.10234	4.34909	4.95649	4.90087	4.61855	4.67914	4.96171	6.96971	4.80884	7.30969	4.66776	4.69966	6.36426	4.66556	6.95668	4.76693	4.40093	4.65486	5.03353	4.1917	4.67673	7.23309
CD1A	4.91818	5.16189	4.76888	5.36178	5.58566	4.12887	4.86437	5.34865	4.20188	4.6507	4.48415	5.12093	4.34692	5.63541	5.71611	4.96037	5.27365	4.93512	4.98928	5.61656	4.91987	5.56743	5.05436	5.04588	4.71152	4.84479	4.75384	5.80457	4.34909	4.95649	5.19963	5.0905	4.67914	5.11434	4.12597	4.8705	4.31028	4.66776	5.23093	4.42073	5.73285	3.88692	5.72966	4.76861	4.65486	5.31581	4.1917	4.67673	3.97551
TCF4	5.76712	6.19752	6.20683	5.97845	6.0145	6.60265	6.95748	6.81432	6.61768	5.7885	5.94075	6.07159	5.79884	5.94353	6.44842	6.32027	6.71881	6.36315	6.79973	6.41726	6.78593	6.54781	6.59628	6.61524	6.27917	6.77955	7.03555	6.18923	6.14534	5.15561	6.6557	5.73436	6.25125	6.58497	5.7747	6.29135	6.19105	6.35564	6.06101	6.86022	5.43912	6.31727	5.4952	5.70721	5.51857	6.73084	5.82069	6.45767	6.44609
ATM	8.28585	8.61145	8.10976	7.86428	7.8625	6.55374	7.53491	8.11621	6.83341	8.41653	6.00585	8.54036	7.93435	7.87245	8.31267	8.09787	7.91759	8.57859	7.92454	7.40383	8.11913	8.31218	7.82305	7.84657	7.54864	8.02056	6.03555	8.15821	6.39909	8.07364	8.14785	8.1512	7.43812	8.57002	5.6967	8.40816	6.23169	8.23828	7.94365	5.72271	7.36757	6.07626	7.74758	7.92511	7.07111	8.20116	6.99518	7.57088	6.35862
CD1C	8.01212	7.60152	6.88737	7.71541	6.79211	5.01769	7.51207	7.5413	6.24845	7.54824	4.48415	7.83915	7.44094	7.23178	8.08835	6.7259	7.41925	8.07634	8.06132	6.74983	8.15243	7.87368	7.64902	7.9682	6.17226	7.38313	5.678	7.51729	5.96846	7.27624	7.69559	6.70521	7.05421	8.01296	4.6967	7.8232	6.19105	7.60356	7.20397	4.42073	6.94436	5.90223	6.9927	6.97806	6.49432	8.17379	5.7358	6.26922	3.97551
IRF8	6.76712	6.37912	7.31163	6.37772	7.189	6.08808	7.60853	6.91053	6.79277	7.01557	6.02691	6.91768	6.50933	7.05045	6.8172	7.27265	6.88873	7.13031	7.29506	7.05469	7.11351	6.48726	6.6999	6.91186	7.64174	6.9722	6.678	6.90143	6.48929	7.31431	6.91423	6.96087	6.80518	6.91579	6.43366	7.4241	7.08413	6.67756	6.43024	6.03305	6.43912	6.34475	6.53702	7.17233	7.49432	7.00386	7.03125	7.50117	5.72786
CCL5	7.98852	8.34776	8.60197	7.47726	7.63341	5.66539	8.57953	8.57105	6.98541	8.48894	4.82527	8.39008	8.98326	7.72691	7.83873	8.07029	8.4293	8.47969	9.34654	7.41726	9.10219	8.95044	9.09426	8.9865	7.70064	8.89215	7.86782	8.02696	7.61482	7.86377	7.97493	8.61406	8.02757	7.49285	6.75559	8.22919	5.81665	8.89479	7.9679	6.47117	8.11428	7.23154	7.52668	8.45977	7.44457	8.88397	6.99518	8.05241	6.7044
TNFRSF9	4.91818	5.00551	4.76888	4.98876	4.5017	4.12887	4.66912	4.40249	4.20188	4.6507	4.48415	5.12093	4.34692	5.16668	5.18696	4.80274	5.27365	4.93512	4.98928	4.60707	4.91987	4.79429	5.05436	4.40305	4.71152	4.84479	4.75384	4.10234	4.34909	4.95649	4.90087	4.61855	4.67914	4.96171	4.12597	4.80884	4.31028	4.66776	4.69966	4.42073	4.66556	3.88692	4.76693	4.40093	4.65486	5.03353	4.1917	4.67673	3.97551
ADA	6.93704	6.28291	7.57925	6.59785	6.31148	6.3962	8.04495	6.78923	7.3914	6.9065	6.22216	7.17113	7.11199	5.97101	6.7392	7.35726	7.35741	7.04641	8.33159	6.56926	7.58111	7.05842	7.89967	8.00457	7.26624	7.65232	8.15373	7.18923	6.83721	6.96775	6.38996	7.40339	6.74105	6.07252	7.34695	7.18309	7.47116	7.16299	6.8336	6.88621	6.4622	7.55934	6.26572	7.63486	7.54242	8.21734	7.97681	6.97224	7.31282
RORC	4.91818	5.00551	4.76888	4.98876	4.5017	4.12887	4.66912	4.5413	5.98541	4.6507	4.48415	5.12093	4.34692	5.16668	5.18696	4.80274	5.27365	4.93512	4.98928	4.60707	4.91987	4.79429	5.05436	4.40305	4.71152	4.84479	4.75384	4.10234	4.34909	4.95649	4.90087	4.61855	4.67914	4.96171	5.11173	4.80884	6.61635	4.66776	4.69966	4.42073	5.34291	5.20179	4.76693	4.40093	4.65486	5.03353	4.1917	4.67673	3.97551
MAPK8	5.72489	6.55421	6.50886	6.03985	5.99374	5.50312	6.04495	6.46413	6.36392	6.14925	6.00585	6.54964	6.5358	6.12573	6.33177	6.4458	6.30377	6.13844	6.37889	5.9843	6.26325	6.60591	6.15021	6.50107	6.35446	6.49005	4.75384	6.1265	4.34909	6.20508	6.10406	6.54993	5.98206	6.59976	5.65605	6.67119	4.31028	6.49859	6.2834	5.66382	6.09963	6.07626	6.40773	6.35357	6.03794	6.35534	5.6914	4.67673	5.94359
CCR10	4.91818	5.00551	4.76888	4.98876	4.5017	6.50312	4.66912	4.40249	6.57038	4.6507	5.16631	5.12093	4.34692	5.16668	5.18696	4.80274	5.27365	4.93512	4.98928	4.60707	4.91987	4.79429	5.05436	4.40305	4.71152	4.84479	4.75384	4.10234	4.34909	4.95649	4.90087	4.61855	4.67914	4.96171	6.79356	4.80884	6.45408	4.66776	4.69966	6.28831	4.66556	6.34475	4.76693	4.40093	4.65486	5.03353	4.1917	4.67673	8.27351
LIMK1	4.91818	5.00551	4.76888	4.98876	4.5017	7.50312	4.66912	4.40249	4.20188	4.6507	6.36133	5.12093	4.34692	5.16668	5.18696	4.80274	5.27365	4.93512	4.98928	4.60707	4.91987	4.79429	5.05436	4.40305	4.71152	4.84479	4.75384	4.10234	4.34909	4.95649	4.90087	4.61855	4.67914	4.96171	7.56019	4.80884	7.08413	4.66776	4.69966	7.05614	4.66556	7.33108	4.76693	4.40093	4.65486	5.03353	4.1917	4.67673	8.13121
B3GAT1	4.91818	5.00551	4.76888	4.98876	4.5017	7.30062	4.66912	4.40249	4.20188	4.6507	6.02691	5.12093	4.34692	5.16668	5.18696	4.80274	5.27365	4.93512	4.98928	4.60707	4.91987	4.79429	5.05436	4.40305	4.71152	4.84479	4.75384	4.10234	4.34909	4.95649	4.90087	4.61855	4.67914	4.96171	7.37226	4.80884	7.19105	4.66776	4.69966	6.72271	4.66556	6.93876	4.76693	4.40093	4.65486	5.03353	4.1917	4.67673	7.60655
FLT1	4.91818	5.00551	4.76888	4.98876	4.5017	4.12887	4.66912	4.40249	4.20188	4.6507	5.00585	5.12093	4.34692	5.16668	5.18696	4.80274	5.27365	4.93512	4.98928	4.60707	4.91987	4.79429	5.05436	4.40305	4.71152	4.84479	4.75384	4.10234	4.34909	4.95649	4.90087	4.61855	4.67914	4.96171	4.91909	4.80884	4.31028	4.66776	4.69966	4.42073	4.66556	5.70429	4.76693	4.40093	4.65486	5.03353	4.1917	4.67673	5.52855
LY96	7.31934	7.62787	7.65363	7.17371	8.83066	9.26308	8.01818	7.28725	11.3999	7.20558	8.78257	6.66796	7.21387	8.9778	6.98109	7.55332	7.12974	7.02903	6.96385	8.43055	7.23245	8.10617	7.63414	7.71373	8.66658	7.40759	10.7087	6.88257	10.6713	7.96775	7.04351	7.48282	8.80518	7.71976	9.88871	6.9824	10.3472	6.98013	7.01521	10.1123	7.99272	9.67753	9.08721	6.48743	10.2555	7.2227	10.3674	8.83731	9.95357
CISH	4.91818	5.00551	4.76888	4.98876	4.64011	6.72551	4.66912	4.40249	7.36392	4.6507	6.57659	5.12093	4.34692	5.16668	5.18696	4.80274	5.27365	4.93512	4.98928	4.60707	4.91987	4.79429	5.05436	4.40305	4.71152	4.84479	5.53598	4.10234	6.90433	4.95649	4.90087	4.61855	4.67914	4.96171	7.43366	4.80884	7.71998	4.66776	4.69966	7.32678	4.66556	7.58261	4.76693	4.40093	4.65486	5.03353	5.97681	4.67673	7.31282
PRF1	7.86758	7.76478	8.77189	8.42451	7.03497	7.41458	8.67516	8.96476	6.52147	8.1332	7.36959	8.10134	9.26224	7.55597	8.58529	8.21839	8.34152	8.12623	8.97928	8.14618	9.12473	9.24672	8.66374	8.98346	7.4605	7.85262	8.50455	8.64587	7.85429	8.12166	8.25408	9.0476	8.62739	7.21387	8.35966	8.37574	7.89466	9.16299	8.98384	7.16632	8.58821	8.08444	7.05159	9.21155	7.73062	8.95645	7.77887	8.23528	7.56808
IFI44	7.41541	5.39455	6.8625	6.03985	12.5844	12.5151	12.2383	6.68426	13.8884	8.79463	12.0289	7.39352	6.2463	8.24872	5.87044	6.65339	6.4293	6.26262	6.93249	11.7271	6.39891	6.0859	8.71411	8.47538	11.9766	6.8347	13.6034	5.21961	13.5972	11.7538	6.37366	6.69042	12.5724	5.57002	13.2794	10.7212	13.5094	6.57803	5.99961	13.4112	6.97678	12.9034	10.0261	6.04163	12.9875	7.79693	13.4436	12.9204	13.1628
IL1RL2	4.91818	5.00551	4.76888	4.98876	4.5017	4.12887	4.66912	4.40249	4.20188	4.6507	4.48415	5.12093	4.34692	5.16668	5.18696	4.80274	5.27365	4.93512	4.98928	4.60707	4.91987	4.79429	5.05436	4.40305	4.71152	4.84479	4.75384	4.10234	4.34909	4.95649	4.90087	4.61855	4.67914	4.96171	4.8487	4.80884	4.31028	4.66776	4.69966	4.42073	4.66556	3.88692	4.76693	4.40093	4.65486	5.03353	4.1917	4.67673	3.97551
RELA	4.91818	5.00551	4.76888	4.98876	4.5017	6.28072	4.81546	4.40249	6.79277	4.6507	6.04767	5.12093	4.34692	5.16668	5.18696	4.80274	5.27365	4.93512	4.98928	4.60707	4.91987	4.79429	5.05436	4.40305	5.22671	4.84479	5.63219	4.10234	6.25225	4.95649	4.90087	4.61855	4.67914	4.96171	7.29496	4.80884	7.73419	4.66776	4.69966	6.91175	4.66556	7.10868	5.21509	4.64308	5.36657	5.03353	4.1917	4.67673	7.04045
PLCB1	5.9615	5.51239	6.33894	5.89229	5.47018	4.12887	5.97985	5.62876	4.20188	5.83686	4.48415	5.8492	5.45488	5.16668	5.99074	5.63844	5.84434	5.6169	6.09712	5.79165	5.72822	5.7503	5.89967	5.97432	5.75722	5.90509	4.75384	5.58884	4.34909	6.06919	6.3405	6.11287	4.67914	5.34261	4.12597	5.7492	4.31028	4.66776	6.14847	4.42073	4.66556	3.88692	4.76693	5.91157	4.65486	6.10008	5.33526	6.20051	3.97551
C10orf54	9.56752	9.45651	9.79508	9.96664	10.3219	9.29815	9.83093	9.06224	10.6859	9.30492	9.60138	8.8567	9.15105	10.0776	9.48643	9.8117	8.79465	9.40586	9.41622	9.83229	9.44218	10.2917	9.55739	10.1658	10.0245	9.86812	10.1638	9.47699	10.7555	9.58577	9.13582	9.76646	10.3095	9.95516	10.2615	9.09373	9.38369	9.52556	9.55019	9.81357	10.5497	10.154	10.9086	10.0165	10.6561	9.46103	10.5322	10.3167	10.0706
BCL10	7.29068	7.18869	7.20683	7.32936	7.62669	6.94369	7.12741	7.16579	8.2634	7.14285	6.95181	7.03683	6.68518	7.74294	7.10177	7.57704	6.82923	7.19409	6.86764	7.1218	7.36143	7.73302	7.39042	7.51794	7.40256	7.53514	7.76546	7.21961	8.36376	7.19695	7.08416	7.51677	7.76275	7.29794	8.05033	7.29135	8.22164	7.29424	7.06101	7.92435	7.6448	7.54757	8.16929	7.22804	7.69914	7.14588	7.86133	7.5572	8.12239
CHIT1	4.91818	5.00551	4.76888	4.98876	4.5017	6.93098	4.66912	4.40249	6.47084	4.6507	6.02691	5.12093	4.34692	5.16668	5.18696	4.80274	5.27365	4.93512	4.98928	4.60707	4.91987	5.16534	5.05436	4.40305	4.71152	4.84479	4.75384	4.10234	7.02986	4.95649	4.90087	4.61855	5.78412	4.96171	7.08136	4.80884	7.12786	4.66776	4.69966	7.60242	5.48492	7.80665	4.76693	4.40093	4.65486	5.03353	4.1917	4.67673	8.19993
MUC1	4.91818	5.00551	4.76888	4.98876	4.5017	4.28072	4.66912	4.40249	4.20188	4.6507	4.48415	5.12093	4.34692	5.16668	5.18696	4.80274	5.27365	4.93512	4.98928	4.60707	4.91987	4.79429	5.05436	4.40305	4.71152	4.84479	4.75384	4.10234	4.34909	4.95649	4.90087	4.61855	4.67914	4.96171	5.11173	4.80884	6.27122	4.66776	4.69966	4.42073	4.66556	5.47481	4.76693	4.40093	4.65486	5.03353	4.1917	4.67673	3.97551
BAD	4.91818	5.00551	4.76888	4.98876	4.5017	4.12887	4.66912	4.40249	4.20188	4.6507	4.48415	5.12093	4.34692	5.16668	5.18696	4.80274	5.27365	4.93512	4.98928	4.60707	4.91987	4.79429	5.05436	4.40305	4.71152	4.84479	4.75384	4.10234	4.34909	4.95649	4.90087	4.61855	4.67914	4.96171	4.12597	4.80884	4.31028	4.66776	4.69966	4.42073	4.66556	4.61683	4.76693	4.40093	4.65486	5.03353	4.1917	4.67673	4.77366
FUT5	4.91818	5.00551	4.76888	4.98876	4.5017	7.25035	4.66912	4.40249	6.18705	4.6507	6.57659	5.12093	4.34692	5.16668	5.18696	4.80274	5.27365	4.93512	4.98928	4.60707	4.91987	4.79429	5.05436	4.40305	4.71152	4.84479	4.75384	4.10234	4.34909	4.95649	4.90087	4.61855	4.67914	4.96171	7.51546	4.80884	7.80323	4.66776	4.69966	6.50512	4.66556	7.27504	4.76693	4.40093	4.65486	5.03353	4.1917	4.67673	8.22487
CXCL9	4.91818	5.00551	4.76888	4.98876	4.5017	4.75465	4.66912	4.40249	4.20188	4.6507	4.48415	5.12093	4.34692	5.16668	5.18696	4.80274	5.27365	4.93512	4.98928	4.60707	4.91987	4.79429	5.05436	4.40305	4.71152	4.84479	4.75384	4.10234	4.34909	4.95649	4.90087	4.61855	4.67914	4.96171	4.12597	4.80884	5.70562	4.66776	4.69966	4.42073	4.66556	3.88692	4.76693	4.40093	4.65486	5.03353	4.1917	4.67673	5.16598
MEF2C	5.59024	5.08789	6.0614	5.86992	5.7432	4.57023	6.04495	5.88707	5.91141	5.49899	4.61882	6.05432	4.34692	5.99798	6.13696	5.96037	6.28174	6.05503	5.81701	5.9103	5.84143	6.21596	6.23151	6.15777	5.64174	6.09773	4.75384	5.88257	4.34909	5.89927	6.58666	5.84539	5.86658	5.89195	4.12597	5.93867	4.31028	6.0926	6.03064	4.42073	5.91119	5.26069	5.86717	5.76861	5.89708	6.05277	5.6914	6.30239	5.23309
CD96	6.07791	6.59485	8.0777	5.97845	5.27754	4.57023	6.14731	7.21372	4.20188	5.85263	4.48415	6.03683	6.82053	5.79768	6.50339	7.64594	6.63441	6.27742	6.17958	5.94777	6.24279	6.89714	7.71411	6.24143	6.93125	7.73194	4.75384	6.54153	6.25225	5.77374	7.04351	8.06778	5.74105	6.59976	5.33413	6.10613	5.91975	6.99949	6.8336	6.03305	6.18536	3.88692	6.31463	7.74589	4.65486	6.35534	6.11767	6.05241	5.4741
SMPD3	4.91818	5.00551	4.76888	4.98876	5.17062	5.86569	4.66912	4.40249	4.20188	4.6507	5.34465	5.12093	4.34692	5.16668	5.18696	4.80274	5.27365	4.93512	4.98928	4.60707	4.91987	4.79429	5.05436	4.40305	4.71152	4.84479	4.75384	4.10234	4.34909	4.95649	4.90087	4.61855	4.67914	4.96171	6.96971	4.80884	7.41932	4.66776	4.69966	6.57071	4.66556	6.76658	4.76693	4.40093	4.65486	5.03353	4.1917	4.67673	6.52855
CXCR4	9.3015	9.12537	8.71397	9.26224	9.60803	7.21932	8.88229	9.45618	7.85331	8.95478	7.29342	8.70994	8.26224	9.58071	9.03338	9.18018	8.7229	9.4375	8.2639	8.66799	8.83118	9.79052	9.41019	9.57952	8.96367	8.82111	8.49178	8.65145	8.99949	8.83263	9.195	9.64509	9.43137	9.98365	8.9903	9.1282	8.37465	8.83137	8.9065	7.87327	9.19917	9.03468	10.0907	9.24973	8.41258	9.02852	8.88616	9.14674	8.83436
ZEB1	6.11107	6.12537	6.28379	6.24496	6.48513	6.17689	5.88822	5.68426	7.15534	5.83686	5.67327	6.10554	5.84191	6.39284	5.95174	6.47974	6.16627	6.0721	5.7101	5.46972	5.6681	6.42407	5.79657	5.94966	6.42602	6.29413	6.56064	5.8441	6.96846	5.9388	5.84497	6.15659	6.36908	6.23298	6.1992	6.20171	7.17029	6.0926	6.03064	6.75128	6.03951	6.14039	6.74758	6.37347	6.25553	6.02852	6.88123	6.39755	6.16598
MSR1	4.91818	5.00551	4.76888	4.98876	4.92961	5.1108	4.66912	4.40249	4.20188	4.6507	4.48415	5.12093	4.34692	5.16668	5.18696	4.80274	5.27365	4.93512	4.98928	4.60707	4.91987	4.79429	5.05436	4.40305	4.71152	4.84479	4.75384	4.10234	4.34909	4.95649	4.90087	4.61855	4.67914	4.96171	4.12597	4.80884	4.31028	4.66776	4.69966	4.42073	4.66556	5.20179	4.76693	4.40093	4.65486	5.03353	4.1917	4.67673	3.97551
LILRA4	4.91818	5.00551	4.76888	4.98876	4.5017	6.17689	4.66912	4.40249	6.94889	5.11043	5.34465	5.12093	4.34692	5.16668	5.18696	4.80274	5.27365	5.4956	4.98928	4.60707	4.91987	5.31218	5.05436	4.55111	4.71152	4.84479	4.75384	4.10234	4.34909	4.95649	4.90087	4.61855	4.67914	4.96171	6.91909	5.7492	6.89466	4.66776	4.69966	5.60242	4.66556	7.38501	4.76693	4.40093	4.65486	5.03353	4.1917	4.67673	5.16598
CYSLTR1	7.54241	7.17981	7.01701	6.90335	7.71177	7.47712	7.69219	7.11621	9.1473	7.22993	6.98447	7.37972	7.2463	6.95734	7.25377	6.88637	7.51676	7.24767	6.99455	7.01992	6.63707	7.32377	7.16063	7.22096	7.19974	7.05193	8.08739	7.32114	8.31526	7.64821	7.33208	6.96087	8.1965	7.26118	8.24102	7.72366	8.30017	6.98013	6.72397	8.10122	6.91119	7.15599	7.17592	6.3931	8.47586	7.12316	8.29132	8.05241	7.23309
PRG2	4.91818	5.00551	4.76888	4.98876	4.5017	6.64996	4.71237	4.40249	6.0558	4.6507	5.77636	5.12093	4.34692	5.16668	5.18696	4.80274	5.27365	4.93512	4.98928	4.60707	4.91987	4.79429	5.05436	4.40305	4.71152	4.84479	4.75384	4.10234	7.19978	4.95649	4.90087	4.61855	4.67914	4.96171	7.1992	4.80884	7.60092	4.66776	4.69966	7.03305	4.66556	6.76658	4.76693	4.40093	4.65486	5.03353	4.1917	4.67673	5.81806
HLA-DPB1	8.99889	8.63763	10.0014	8.25363	8.777	6.78322	8.70903	8.63229	6.87294	8.91215	6.34465	9.23195	8.82591	8.46226	8.73633	9.579	8.89237	9.18038	8.88002	8.2398	8.7465	8.78425	8.89967	8.54701	9.69582	9.00462	6.32185	8.77419	6.87116	9.2212	8.75972	9.57633	8.70788	8.81478	7.35966	9.19476	7.98063	8.65332	7.90231	7.32678	8.48492	7.91145	8.79144	10.3735	8.46343	8.79693	9.55249	8.31056	6.68055
CX3CR1	8.2416	7.40982	9.04491	8.81537	7.73071	6.91815	9.6854	9.42598	7.59422	8.24793	6.06813	8.56497	8.60619	6.78225	9.17343	8.30614	9.22227	8.37007	9.68679	8.94777	9.66425	8.82151	8.71057	9.49256	8.09387	8.31367	10.0831	9.13449	7.90433	9.11951	8.90575	8.69042	8.65085	7.19451	8.42159	8.79282	7.55362	9.22188	9.30577	6.98575	8.37367	8.87892	7.77406	8.97481	9.67237	9.64174	9.90815	9.09089	7.82894
SLAMF1	6.54241	6.37912	6.45995	6.29619	5.61314	6.3962	6.41691	6.43207	7.27819	6.46862	5.72574	6.63347	6.5358	6.19729	6.77315	6.37541	6.01426	6.29206	6.4247	6.44373	6.45336	6.16534	6.04169	6.13607	6.42602	6.06736	4.75384	6.54153	7.59464	6.23714	6.60073	6.76293	6.18851	6.87987	6.1992	6.77429	7.81665	6.8792	6.35869	7.07886	5.48492	6.88362	6.13565	7.05401	6.25553	6.65368	5.44629	6.23528	6.16598
BCL6	8.01212	8.28291	8.37456	8.61139	9.05765	8.63436	8.16205	7.13624	10.4644	7.72995	8.24481	7.46718	7.66133	9.33849	8.03338	8.45008	7.00084	7.89633	7.51216	8.82727	8.01437	8.77161	8.01323	8.7027	9.04547	8.43758	9.638	8.29998	10.7758	7.93391	7.52894	8.28033	9.0717	8.60711	9.71906	7.8705	9.82995	8.2301	8.1271	9.6411	9.42744	9.28926	9.90758	8.77236	9.32935	7.46781	9.67154	8.97739	9.66545
STAT5A	7.11107	6.91678	7.15656	7.11785	7.82773	7.48584	7.79037	6.75075	8.4579	6.92898	7.37781	6.7127	6.68518	8.26546	7.05654	7.09787	6.48819	6.76074	6.88413	7.48255	7.09079	7.33526	7.17097	7.23123	7.93125	7.14212	8.52975	6.97449	9.43358	7.49753	6.6557	6.87186	7.98206	7.09358	8.42764	6.94973	8.41932	7.21362	7.13426	7.76536	7.36757	8.08444	8.32062	7.06629	8.15857	7.27516	8.59829	7.42792	7.91321
ETS1	10.3636	10.6752	10.4651	10.0184	9.61993	8.80777	9.97846	10.476	9.02981	10.357	8.75759	10.7674	10.3071	9.68396	10.3184	10.1969	10.5574	10.6016	10.354	9.50472	9.959	10.1524	10.2729	10.2145	9.82276	10.4242	8.67235	10.5845	8.87116	10.3723	10.4926	10.3145	9.47144	10.3891	8.45751	10.7874	8.08413	10.378	10.2607	8.55459	9.83586	8.58261	9.57766	10.2658	9.73838	10.1862	8.99974	9.93307	9.14435
RAG2	4.91818	5.00551	4.76888	4.98876	4.5017	4.12887	4.66912	4.40249	4.20188	4.6507	4.48415	5.12093	4.34692	5.16668	5.18696	4.80274	5.27365	4.93512	4.98928	4.60707	4.91987	4.79429	5.05436	4.40305	4.71152	4.84479	4.75384	4.10234	4.34909	4.95649	4.90087	4.61855	4.67914	4.96171	4.12597	4.80884	5.38369	4.66776	4.69966	4.42073	4.66556	4.61683	4.76693	4.40093	4.65486	5.03353	4.1917	4.67673	4.77366
KLRG1	5.94932	5.36353	7.01701	5.72791	4.5017	5.81124	6.04495	7.86323	7.77201	5.7885	4.50335	5.8691	5.79884	5.16668	6.34688	6.20323	7.2928	6.03775	6.69148	6.18593	6.28343	6.31218	6.6416	5.84657	5.93125	6.93903	4.75384	6.1265	4.34909	6.01475	6.92546	6.70521	5.69666	5.11434	7.7747	6.10613	6.84313	6.19694	6.23093	6.93684	5.65485	6.37172	4.76693	6.813	5.41903	6.43128	5.39184	6.82024	3.97551
TLR7	4.91818	5.00551	4.76888	4.98876	4.5017	4.69576	4.95748	4.40249	4.20188	4.6507	4.48415	5.12093	4.34692	5.16668	5.18696	4.80274	5.27365	4.93512	4.98928	4.60707	4.91987	4.79429	5.05436	4.40305	4.71152	4.84479	4.75384	4.10234	4.34909	4.95649	4.90087	4.61855	5.55464	4.96171	4.12597	4.80884	4.31028	4.66776	4.69966	4.42073	4.66556	3.88692	4.76693	4.40093	4.65486	5.03353	4.1917	4.67673	3.97551
IL2RB	6.86758	6.37912	7.4264	7.14605	5.52907	6.48584	6.9	6.93362	6.70788	6.97292	6.27594	7.29399	7.68518	5.76665	7.32416	6.83484	6.81396	7.22495	7.8084	6.54501	7.58924	7.09945	6.6564	7.56741	6.49419	6.44351	6.37844	7.57716	6.08875	6.69513	6.88002	7.25037	6.3971	5.81795	6.88432	7.24722	7.5212	7.75936	7.67572	6.63345	7.09963	6.74611	5.53702	8.18927	6.19664	7.06474	5.39184	6.12836	6.6563
MR1	4.91818	5.00551	4.76888	4.98876	6.7432	7.45065	5.16694	4.5413	9.50269	4.6507	7.01642	5.12093	4.34692	6.39284	5.18696	4.80274	5.27365	4.93512	4.98928	7.01992	4.91987	4.79429	5.05436	4.55111	6.58034	4.84479	8.67235	4.10234	9.18636	5.75171	4.90087	4.61855	7.22022	4.96171	7.7747	4.80884	9.05045	4.66776	4.69966	8.70821	4.66556	7.17142	5.9313	4.40093	8.18153	5.03353	8.54938	6.62432	7.88219
TWIST2	4.91818	5.00551	4.76888	4.98876	7.03497	7.74016	5.95748	4.40249	9.13109	4.6507	7.36133	5.12093	4.34692	6.98456	5.18696	4.80274	5.27365	4.93512	4.98928	6.18593	4.91987	4.79429	5.05436	4.79212	6.55928	4.84479	9.10845	4.10234	9.17282	5.66008	4.90087	4.61855	7.22022	5.15498	7.51546	4.80884	8.91975	4.66776	4.69966	8.26868	5.29228	7.17142	7.1492	4.40093	8.26989	5.03353	8.91057	7.05241	8.38837
IFNA4	4.91818	5.00551	4.76888	4.98876	4.5017	5.46835	4.66912	4.40249	4.20188	4.6507	5.47297	5.12093	4.34692	5.16668	5.18696	4.80274	5.27365	4.93512	4.98928	4.60707	4.91987	4.79429	5.05436	4.40305	4.71152	4.84479	4.75384	4.10234	4.34909	4.95649	4.90087	4.61855	4.67914	4.96171	6.6353	4.80884	7.38369	4.66776	4.69966	4.42073	4.66556	6.42418	4.76693	4.40093	4.65486	5.03353	4.1917	4.67673	4.77366
GNAS	9.00773	9.3694	9.41147	9.3797	9.2094	8.68823	9.16937	9.16091	9.94426	8.98906	8.90707	9.12015	9.28582	9.10418	9.2234	9.37315	9.24522	8.9981	9.24487	9.78131	9.1715	9.648	9.45743	9.11405	9.51621	9.69268	9.10426	9.36935	9.74868	8.95093	9.03317	9.3526	9.40402	9.16496	9.08519	9.04043	8.64673	9.43245	9.3184	8.58665	9.30191	9.47792	9.28425	9.22804	8.92909	9.01933	9.22668	9.46867	9.48102
JUN	7.39759	6.06878	5.74493	7.34566	7.02477	7.25035	6.49664	6.61455	8.66348	6.7885	7.73216	6.36578	6.11199	6.56502	6.33177	6.86083	6.16627	7.02026	5.51216	7.15422	6.32296	7.27684	6.56525	7.33008	6.4491	6.41966	6.80728	7.18923	8.26508	6.5107	6.90292	5.97315	6.60355	6.36009	8.80754	7.3257	7.08413	6.49859	6.38294	7.03305	7.90278	8.30333	7.2781	6.59304	7.65607	6.43128	7.03125	6.36652	8.83436
KLRK1	8.27125	8.00487	8.46822	8.29619	6.67963	5.86569	8.21487	9.25783	6.83341	8.35143	5.72574	8.59217	8.50264	7.14998	8.64456	8.06471	8.75523	8.70163	8.72848	7.84228	8.86505	8.66176	8.56132	8.51794	7.39068	8.32012	7.01785	8.61192	6.4449	7.59971	8.53628	8.55811	7.31137	7.57751	6.11173	8.19708	4.31028	8.62865	8.67572	4.42073	7.60387	5.66122	6.89959	8.17233	7.11947	8.49018	6.6914	7.80874	5.63164
CD34	4.91818	5.00551	4.76888	4.98876	4.5017	5.46835	4.66912	4.40249	4.20188	4.6507	5.37781	5.12093	4.34692	5.16668	5.18696	4.80274	5.27365	4.93512	4.98928	4.60707	4.91987	4.79429	5.05436	4.40305	4.71152	4.84479	4.75384	4.10234	4.34909	4.95649	4.90087	4.61855	4.67914	4.96171	5.6967	4.80884	6.23169	4.66776	4.69966	4.42073	4.66556	5.97438	4.76693	4.40093	4.65486	5.03353	4.1917	4.67673	6.98312
MAPK11	4.91818	5.00551	4.76888	4.98876	4.5017	6.35873	4.66912	4.40249	4.20188	4.6507	5.41024	5.12093	4.34692	5.16668	5.18696	4.80274	5.27365	4.93512	4.98928	4.60707	4.91987	4.79429	5.05436	4.40305	4.71152	4.84479	4.75384	4.10234	4.34909	4.95649	4.90087	4.61855	4.67914	4.96171	6.6353	4.80884	6.30969	4.66776	4.69966	5.72271	4.66556	5.07626	4.76693	4.40093	4.65486	5.03353	4.1917	4.67673	7.60655
CCR1	6.58238	7.36353	7.09382	6.40908	8.22507	8.07658	7.20541	5.86323	9.67471	6.8048	7.41024	6.24913	6.82053	8.14396	6.26971	7.26293	6.19011	6.36315	6.20606	6.87182	5.28343	7.44544	6.15021	6.3205	7.88967	6.24069	7.92593	5.95657	8.94474	6.68354	6.10406	6.89786	7.98206	7.62168	8.28832	6.89359	7.38369	6.55203	6.43024	9.1978	7.77955	8.20179	8.54216	7.34352	8.5065	5.66944	8.71931	7.82024	8.62541
MYC	8.06668	7.57467	7.07229	7.26224	7.24277	6.87898	6.91168	7.19474	6.83341	7.82891	6.34465	7.50583	6.5358	7.6268	7.26971	7.56127	7.12974	8.17446	5.94826	6.79165	6.85497	7.19087	7.13972	6.70639	7.4491	7.19927	5.9634	6.8441	6.4449	7.55589	7.52894	7.28033	6.92548	8.13987	5.73622	7.85882	5.45408	6.79304	7.06101	6.24878	6.34291	5.93876	7.73865	7.31293	7.69914	6.77524	7.10079	6.93042	6.09559
IFNGR1	9.79969	9.90874	10.2518	10.125	10.366	9.76722	9.87784	9.39513	11.4595	9.40988	10.0217	8.97849	9.80157	10.1812	9.68078	9.87046	9.17226	9.64997	9.31039	9.9843	9.73373	10.7045	10.0833	10.018	10.3832	10.266	11.1105	9.52643	11.8479	9.27624	9.2871	10.1566	10.917	10.3677	10.8953	9.38798	10.8627	9.86343	9.44759	10.3386	10.4722	10.5086	11.285	9.41726	10.8345	9.58259	11.3478	10.1284	10.9709
ITGB2	9.7749	9.23228	10.0057	9.6917	10.0995	10.7903	10.2184	10.0451	11.9043	9.52505	10.6582	9.62179	9.53908	9.75879	9.43611	9.92692	9.89237	9.55904	10.1112	9.53888	9.90467	10.3692	10.1437	10.4808	9.84251	9.83244	10.8303	9.264	10.894	9.67917	9.60073	9.84706	9.88401	9.59423	10.9094	9.72688	10.5755	9.53886	9.33092	10.5301	9.98477	11.0608	10.4259	10.089	10.2537	10.0677	10.5587	10.0861	11.6768
IL2RG	8.03534	8.11609	7.68943	7.57036	7.63341	8.57432	7.62991	8.13126	9.61185	8.02603	8.17577	8.17113	8.14676	7.56502	7.77873	7.69734	8.05379	8.22495	8.28888	7.27708	7.84143	7.96531	8.09697	8.08036	7.27917	7.9722	7.63219	8.03552	7.95269	7.9241	7.89151	7.66036	6.8464	7.60711	8.93191	8.1784	8.14923	7.8041	7.46473	8.74419	7.60387	9.09256	7.54729	7.91836	7.49432	7.95324	6.95819	7.59785	9.2615
MYD88	7.53428	7.92211	7.7652	8.13671	9.37306	9.03858	8.78721	7.37419	11.2428	7.44281	9.05024	6.82902	7.76567	8.59182	7.78429	7.69734	7.48819	7.35619	7.74662	8.9888	8.19566	8.77161	8.41237	8.42707	8.96367	8.44351	10.0356	7.54153	10.728	7.85346	7.37366	7.71986	9.3369	8.24715	10.089	7.94421	10.0333	8.06529	7.54214	10.2412	8.49615	9.87422	9.4952	7.41246	9.47586	7.96606	9.67154	9.27759	9.99283
ATG10	5.27613	5.69795	5.8499	5.65128	5.0145	5.53706	5.65792	5.57105	6.83341	5.86823	5.08831	5.72367	5.84191	5.16668	6.10177	5.4458	5.87409	5.54535	5.91655	6.05469	5.69847	5.91257	5.74213	5.484	5.99538	6.06736	5.92593	6.02696	4.34909	5.70662	5.69559	5.51677	5.98206	6.15498	4.12597	5.8232	4.31028	6.19694	5.56351	6.12325	5.65485	4.61683	5.61719	5.3931	6.2841	5.76059	5.93933	5.70094	5.09559
ALOX5	5.31461	5.5404	5.18693	6.20977	6.91864	8.5074	5.6854	5.16579	9.76677	4.94378	8.63263	5.12093	4.34692	7.38264	5.46236	5.86083	5.27365	4.93512	4.98928	7.03741	5.63707	6.44544	5.36362	6.30113	6.30471	4.84479	7.79694	5.63464	9.26508	5.05127	4.90087	6.0905	6.36908	5.89195	8.92338	4.80884	8.35639	4.66776	5.99961	9.85035	6.77033	9.15211	7.55748	5.13784	6.3396	5.03353	7.11767	7.12836	9.21661
CD1B	4.91818	5.00551	4.76888	4.98876	4.5017	4.12887	4.66912	5.31389	4.20188	4.82092	4.48415	5.23387	4.34692	5.41302	5.18696	4.80274	5.75123	4.93512	4.98928	4.60707	4.91987	4.79429	5.05436	4.40305	4.71152	4.84479	4.75384	5.02696	4.34909	5.28393	5.66912	4.61855	4.67914	4.96171	4.12597	5.34257	4.31028	4.66776	4.69966	4.42073	4.66556	3.88692	4.76693	4.40093	4.65486	5.03353	4.1917	4.67673	3.97551
PTGER3	4.91818	5.00551	4.76888	4.98876	4.5017	7.70326	4.66912	4.40249	6.87294	4.6507	6.47297	5.12093	4.34692	5.16668	5.18696	4.80274	5.27365	4.93512	4.98928	4.60707	4.91987	4.79429	5.05436	4.40305	4.71152	4.84479	4.75384	4.10234	4.34909	4.95649	4.90087	4.61855	4.67914	4.96171	7.64571	4.80884	6.89466	4.66776	4.69966	6.69357	4.66556	7.15599	4.76693	4.40093	4.65486	5.03353	4.1917	4.67673	9.18305
LILRA1	5.35208	6.75883	4.76888	7.31287	7.98851	6.13317	8.67173	5.71122	6.30734	5.41653	5.77636	5.32313	4.34692	7.59182	7.27762	4.80274	5.78294	5.54535	7.96385	8.12997	8.32296	5.60591	5.32709	8.17914	4.71152	4.84479	9.24405	7.29285	5.96846	6.2212	5.12368	4.61855	5.86658	6.93925	5.48097	5.79895	4.31028	4.66776	7.45333	8.02137	4.66556	9.653	8.00765	4.40093	7.07111	8.26482	5.7358	6.48682	6.09559
CD5	6.459	6.34776	6.5248	5.67728	5.47018	5.91815	5.71237	6.06486	4.20188	6.32907	5.41024	6.61001	6.11199	5.76665	6.22135	6.2234	6.71881	6.26262	6.15262	5.74983	5.6681	6.19087	5.92433	5.8196	5.82937	6.24069	4.75384	5.9922	4.34909	5.97727	6.21801	6.21979	4.67914	6.52421	6.67652	6.39204	6.86912	5.77067	5.99961	5.98575	5.18536	6.26069	5.45213	6.09054	5.89708	6.43128	5.08372	4.67673	6.13121
HLA-DRB1	10.8566	10.6855	11.2896	11.0386	11.2122	8.4945	11.1312	11.0603	8.52147	10.7859	8.18985	10.9443	10.5984	10.9871	11.4058	11.0149	11.158	10.8326	11.2044	11.1781	10.9839	10.7319	10.9995	11.0632	11.3039	11.1476	8.64954	11.4612	8.26508	11.0913	11.0267	10.738	10.3726	10.8562	9.12668	10.8419	9.16505	10.8151	10.9639	8.55459	10.6232	8.87892	11.0828	11.2645	10.1431	10.9772	10.8064	11.3278	9.47063
KLRF1	4.91818	5.59485	6.49274	5.59785	4.5017	4.12887	6.33252	7.31389	4.20188	5.02951	4.48415	5.3517	6.9639	5.16668	6.20486	5.7259	6.68564	5.77123	7.03941	5.30622	7.03237	6.86578	6.58085	6.64627	5.71975	6.06736	4.75384	5.92005	4.34909	5.15561	6.43779	6.61406	5.86658	4.96171	4.12597	5.4709	4.31028	6.55203	5.72397	4.42073	5.65485	3.88692	4.76693	6.24973	4.65486	6.62162	5.08372	6.05241	3.97551
TRIM39	6.42423	6.64732	6.87499	6.54235	6.48513	6.33962	6.9	6.7377	7.94889	6.23596	5.61882	6.85919	6.66133	6.92959	6.18818	6.59264	7.01426	6.54535	6.74662	6.63965	6.90792	7.05842	6.54948	6.58353	6.99538	6.51277	7.01785	6.442	7.98406	6.25291	6.58666	6.69042	6.78412	6.89195	6.45751	6.40816	7.21151	6.60356	6.38294	7.36426	6.34291	6.42418	7.03709	6.20601	7.03794	6.97877	6.77887	6.70094	6.23309
HDAC3	6.56652	6.92743	6.58686	6.6901	6.78004	6.89216	6.67173	6.33137	7.12292	6.72138	6.8132	6.56192	6.68518	6.63541	6.63228	6.86083	6.78294	6.77123	6.63415	6.63965	6.93369	6.81741	6.75593	6.84657	7.04168	6.87032	6.29271	6.442	6.53236	6.40177	6.48409	6.71986	6.76275	6.62891	6.90181	6.7492	6.73419	6.62865	6.8159	7.18738	6.69438	6.72535	6.89959	6.991	6.65607	6.8738	6.88123	6.5434	6.88219
HPRT1	6.7033	6.51239	6.87499	6.46984	6.55764	6.60265	6.54244	6.62876	5.91141	6.75533	6.5183	6.79822	6.90419	6.28748	6.51681	6.37541	6.52616	6.65139	6.46909	6.21696	6.43544	6.13934	6.45108	6.15777	6.30471	6.62129	6.678	6.54153	6.08875	6.52376	6.75972	6.41243	6.45154	6.55491	6.43366	6.30862	6.19105	6.4431	6.47605	6.07886	6.23981	5.82628	6.16262	6.22804	6.56587	6.55527	6.24599	6.51538	6.05906
ABCF1	7.41982	7.34776	7.48461	7.49198	7.45507	7.74742	7.42509	7.4799	8.20264	7.49899	7.69974	7.36578	7.3983	7.38264	7.25377	7.62333	7.32546	7.35619	7.55398	7.46972	7.37089	7.7243	7.63414	7.58353	7.62157	7.60023	7.58489	7.57716	8.04481	7.61199	7.42993	7.67546	7.67394	7.38593	7.99438	7.44769	7.89466	7.8041	7.48727	8.00959	7.6448	8.05146	7.33847	7.49653	7.26989	7.3747	7.54938	7.52946	8.24127
POLR2A	8.65726	8.59151	8.9507	8.84147	8.83941	8.87567	8.7519	8.51858	9.52147	8.08061	8.72251	8.29399	8.52923	9.13183	8.49663	8.81503	8.40912	8.54535	7.98694	8.89599	8.75375	9.15564	8.66007	8.9865	9.16182	8.77486	9.1456	8.38953	9.06695	8.21718	8.7846	8.86529	9.40056	8.90392	8.70668	8.8232	9.32386	8.66549	8.3278	9.23873	8.52932	9.14039	9.08016	8.72668	8.96041	8.4768	9.19125	8.65031	9.10905
PPIA	11.6157	11.4593	11.9511	11.3436	11.3801	12.2281	11.533	11.3492	12.3578	11.5579	12.2153	11.5392	11.4993	11.5406	11.3351	11.6262	11.4658	11.5606	11.5649	11.0855	11.3507	11.7869	11.643	11.582	11.8534	11.7854	11.6794	11.5408	12.0052	11.7621	11.4921	11.8821	11.5907	11.6967	12.8428	11.7871	13.3049	11.7036	11.406	12.1775	11.7801	12.9243	12.0035	11.3629	12.2743	11.6017	12.2665	11.5987	12.2057
G6PD	5.49294	5.88436	6.49274	6.67728	6.59946	6.57023	6.16694	5.60019	8.3914	5.57699	6.53309	5.43416	6.14676	6.50988	5.82801	6.68284	5.81396	5.83263	5.94826	6.24733	6.0677	6.80092	6.21161	6.92457	6.75722	6.51277	6.9634	6.18923	7.81994	6.0869	5.55809	6.71986	6.80518	6.05114	6.67652	5.12576	6.91975	6.65332	6.14847	7.48825	7.18536	7.23154	7.17592	6.87015	6.67777	6.00386	6.7358	7.01288	7.13121
ALAS1	7.32877	6.95891	7.13595	6.90335	7.35282	7.65769	6.91168	6.9787	8.03852	6.7885	7.83127	6.24913	6.33941	7.7107	6.68078	7.46287	6.4492	7.03775	6.94826	6.92915	7.51439	7.8418	7.81647	7.44041	7.79375	7.29413	6.51089	6.1265	7.51099	6.62416	6.7846	7.3759	7.15609	7.30698	7.45751	6.23824	8.71282	6.9605	6.60533	8.05614	7.59345	8.22416	7.65566	6.97806	6.74096	7.29563	7.70263	7.5434	8.44609
OAZ1	13.7987	15.4726	16.0039	15.6721	15.4866	13.832	15.3822	15.3287	15.1643	14.1148	14.0557	14.3825	15.4183	15.4011	15.6246	15.0805	15.1801	13.824	15.1875	16.7188	14.867	15.6399	15.047	15.0816	15.5891	15.346	14.8667	15.4584	16.3268	14.2196	14.6115	15.333	16.2017	14.7176	14.1064	14.1425	15.4567	15.2136	16.0929	14.9843	15.3172	14.579	15.0917	14.5212	14.7808	15.2956	15.2716	15.5245	14.4698
ERCC3	6.83486	6.75883	6.55617	6.81244	6.52907	6.30062	6.65792	6.64284	6.36392	6.61447	6.42618	6.85919	6.75444	6.97101	6.8912	6.41103	6.79853	6.86238	6.69148	6.63965	6.71342	6.67991	6.79657	6.74989	6.27917	6.34566	6.84792	6.63464	6.87116	6.66008	6.80905	6.5983	6.60355	6.77947	6.14148	6.8232	6.91975	6.67756	6.74283	6.36426	6.75171	6.74611	6.78277	6.5412	6.74096	6.60531	6.41932	6.42792	6.38837
SDHA	6.94932	6.92743	6.9712	7.00948	7.15201	6.93098	7.17665	7.39096	6.87294	6.88366	7.01642	6.88873	6.73172	7.19729	7.17977	7.20323	7.04074	6.83263	7.12514	7.50786	7.0204	7.11287	6.8361	7.13607	7.22671	7.03633	7.07032	7.2785	6.93675	7.27624	6.99105	7.06778	6.98206	7.12461	7.0025	7.14513	6.73419	6.92042	6.95178	6.83374	7.14314	7.12462	7.29038	7.21707	7.24104	7.06474	7.3779	7.45767	6.90294
PPBP	13.1709	14.0824	13.57	13.0037	13.5749	13.4324	12.9955	13.1886	14.0466	13.4159	11.1033	13.4715	14.6059	13.5561	13.229	13.4406	13.2802	13.5652	13.0267	12.866	13.0675	14.9405	14.391	12.7486	13.4405	14.4593	13.1308	13.3985	14.6192	13.186	13.1857	13.3012	14.9019	13.7588	12.8428	13.3244	13.8691	14.6997	12.8437	13.3196	14.4062	13.4812	13.5898	12.8351	13.186	13.0973	12.8766	13.1133	13.9379
DDX50	7.65164	7.87888	7.89352	7.49198	7.31148	7.24008	7.48104	7.72452	7.33591	7.75952	7.11806	7.88873	7.79884	7.64397	7.75627	7.86726	7.87409	7.65139	7.79102	6.85219	7.64489	7.81741	7.50112	7.65392	7.4491	7.47855	6.84792	7.78439	7.19978	7.63623	7.62159	7.70521	7.00044	7.73325	7.17063	7.60979	7.03905	7.75936	7.77067	7.32678	7.51835	7.44972	7.3266	7.61827	7.43186	7.66158	7.30611	7.71332	7.58102
TBP	6.03246	6.17981	6.40932	5.91432	5.92961	5.81124	5.79037	6.57105	5.91141	6.07053	5.67327	5.88873	6.03984	5.88695	5.8912	5.98422	6.16627	6.2173	6.12514	5.61656	6.28343	6.42407	6.17097	6.09168	6.08653	6.09773	4.75384	4.88257	4.34909	5.75171	6.14305	6.02124	5.3971	6.19451	5.33413	5.64423	4.31028	5.62865	6.17649	5.66382	6.00849	5.42418	6.29038	5.73823	5.82113	6.21197	5.97681	4.67673	5.58102
TUBB	8.47182	8.12998	7.91182	8.25363	7.89084	7.78322	8.12741	8.26012	7.98541	8.58881	8.32777	8.2829	7.66133	7.60941	8.34688	8.00185	8.10487	8.52689	8.37889	7.97525	8.38963	8.36361	8.62665	8.17383	7.84686	8.27432	7.24785	8.38953	7.71168	8.57483	8.03835	8.19379	7.54215	8.16993	7.01862	8.6544	6.34717	8.0926	8.24423	7.63345	7.80685	7.60551	7.81713	8.3283	8.004	8.23864	7.63392	8.14674	7.35862
GUSB	6.28585	6.62132	6.70351	6.43978	6.88522	7.66539	6.22427	6.31389	8.02104	6.58645	7.91838	6.51217	6.48236	6.79768	6.36183	6.68284	6.56316	6.4176	6.7101	6.08863	6.77172	6.94294	6.62665	6.67664	6.37871	7.00462	6.76546	6.78439	6.61482	6.15561	6.70865	6.71986	6.34051	6.79241	8.32767	6.10613	7.86912	6.41453	6.54214	7.80678	6.89432	8.17907	6.91553	6.73823	6.67777	6.3747	6.33526	6.7737	8.4741
UBB	11.2645	13.3258	13.7516	14.5584	12.7207	11.8323	13.5087	13.1085	13.7373	11.7913	10.5294	12.3168	12.5276	12.4794	14.6123	12.8338	13.0424	11.4543	13.6912	15.2978	13.0706	12.5185	13.4634	13.1805	13.2433	13.7546	13.9383	14.6313	14.7972	11.7437	12.3355	12.8908	12.9713	12.1872	11.2089	11.6552	14.7124	12.21	15.0193	13.7524	12.2192	10.9466	12.2715	12.956	12.1691	13.3774	13.184	13.0612	11.9004
[truncated: 18 more columns]
