# Supplementary material for: Transcriptomic Analysis Reveals Host miRNAs Correlated with Immune Gene Dysregulation during Fatal Disease Progression in the Ebola Virus Cynomolgus Macaque Disease Model
Source: Microorganisms. 2021 Mar 23;9(3):665. doi: 10.3390/microorganisms9030665 (PMC8005181; doi:10.3390/microorganisms9030665)
Supplement: Supplementary file 1 [file microorganisms-09-00665-s001.zip › Supplemental Table S3 - Housekeeping Genes.xlsx]

## Sheet: Sheet1
Table S3. Stable housekeeping genes selected by nCAAM and geNorm for nanostring count normalization
	Gene	Order selected by geNorm	SD after normalization
ERCC3-mRNA	NM_001287632.1:908	1	0.284
SDHA-mRNA	XM_001094170.2:911	2	0.217
HPRT1-mRNA	NM_001283594.1:533	3	0.269
HDAC3-mRNA	XM_015452048.1:403	4	0.227
ABCF1-mRNA	XM_005553641.1:1966	5	0.295
TRIM39-mRNA	NM_001319626.1:1026	discarded	0.431
POLR2A-mRNA	XM_001118060.2:2605	discarded	0.405
PPIA-mRNA	NM_001032809.1:108	discarded	0.552
G6PD-mRNA	XM_005595008.1:1551	discarded	0.621
ALAS1-mRNA	XM_005547319.2:851	discarded	0.599
OAZ1-mRNA	NM_001134900.1:345	discarded	0.644
PPBP-mRNA	XM_005555081.1:272	discarded	0.813
DDX50-mRNA	XM_005565684.2:1318	discarded	0.431
TBP-mRNA	NM_001284983.1:738	discarded	0.557
TUBB-mRNA	XM_005553615.2:2019	discarded	0.635
GUSB-mRNA	XM_015447246.1:879	discarded	0.627
UBB-mRNA	XM_015437369.1:1030	discarded	1.17
