# Supplementary material for: Transcriptomic Analysis Reveals Host miRNAs Correlated with Immune Gene Dysregulation during Fatal Disease Progression in the Ebola Virus Cynomolgus Macaque Disease Model
Source: Microorganisms. 2021 Mar 23;9(3):665. doi: 10.3390/microorganisms9030665 (PMC8005181; doi:10.3390/microorganisms9030665)
Supplement: Supplementary file 1 [file microorganisms-09-00665-s001.zip › Supplemental Table S4 - miRNA RAW counts.xlsx]

## Sheet: Sample MetaData
Array	ColumnName	NHP ID	Day	Classification_Final	TotalReads	Infected_Viremic	Clinical Score	Bins
54	ID2_Day1	ID2	Day1	Day1	947423	Incubation	0	Incubation
56	ID2_Day2	ID2	Day2	Day2	848726	Incubation	0	Incubation
11	ID2_Day3	ID2	Day3	Day3	921137	Incubation	0	Incubation
18	ID2_Day4	ID2	Day4	Day4	907700	Viremic	0	Early
37	ID2_Day5	ID2	Day5	Day5	1424617	Viremic	1	Mid
17	ID2_Day6	ID2	Day6	Day6	1608347	Viremic	2	Mid
36	ID2_Day7	ID2	Day7	Day7	1458800	Viremic	3	Late
5	ID2_DayN14	ID2	DayN14	Day0	957448	Not Infected	0	Not Infected
71	ID2_DayN7	ID2	DayN7	Day0	3105598	Not Infected	0	Not Infected
3	ID3_Day1	ID3	Day1	Day1	1021334	Incubation	0	Incubation
42	ID3_Day2	ID3	Day2	Day2	1331593	Viremic	0	Ealy
43	ID3_Day3	ID3	Day3	Day3	1404890	Viremic	0	Ealy
60	ID3_Day4	ID3	Day4	Day4	927777	Viremic	0	Ealy
69	ID3_Day5	ID3	Day5	Day5	1553261	Viremic	1	Mid
47	ID3_Day6	ID3	Day6	Day6	1141515	Viremic	4	Late
16	ID3_DayN14	ID3	DayN14	Day0	1580966	Not Infected	0	Not Infected
32	ID3_DayN7	ID3	DayN7	Day0	1267264	Not Infected	0	Not Infected
50	ID4_Day1	ID4	Day1	Day1	1246601	Incubation	0	Incubation
22	ID4_Day2	ID4	Day2	Day2	966552	Incubation	0	Incubation
26	ID4_Day3	ID4	Day3	Day3	1031119	Viremic	0	Ealy
29	ID4_Day4	ID4	Day4	Day4	1071535	Viremic	0	Ealy
1	ID4_Day5	ID4	Day5	Day5	896275	Viremic	2	Mid
66	ID4_DayN14	ID4	DayN14	Day0	1167175	Not Infected	0	Not Infected
55	ID4_DayN7	ID4	DayN7	Day0	10353493	Not Infected	0	Not Infected
45	ID5_Day1	ID5	Day1	Day1	1443669	Incubation	0	Incubation
52	ID5_Day2	ID5	Day2	Day2	993787	Incubation	0	Incubation
39	ID5_Day3	ID5	Day3	Day3	1447143	Viremic	0	Ealy
75	ID5_Day4	ID5	Day4	Day4	2921530	Viremic	0	Ealy
72	ID5_Day5	ID5	Day5	Day5	3032568	Viremic	2	Mid
14	ID5_Day6	ID5	Day6	Day6	1463709	Viremic	2	Mid
12	ID5_Day7	ID5	Day7	Day7	784349	Viremic	4	Late
13	ID5_DayN14	ID5	DayN14	Day0	1793371	Not Infected	0	Incubation
4	ID5_DayN7	ID5	DayN7	Day0	1105090	Not Infected	0	Incubation
59	ID6_Day1	ID6	Day1	Day1	912722	Incubation	0	Ealy
33	ID6_Day2	ID6	Day2	Day2	1579840	Incubation	0	Ealy
9	ID6_Day3	ID6	Day3	Day3	1077395	Viremic	0	Ealy
30	ID6_Day4	ID6	Day4	Day4	959228	Viremic	0	Ealy
65	ID6_Day5	ID6	Day5	Day5	1564374	Viremic	0	Ealy
49	ID6_Day6	ID6	Day6	Day6	1347838	Viremic	1	Mid
41	ID6_Day7	ID6	Day7	Day7	1298782	Viremic	2	Mid
68	ID6_Day8	ID6	Day8	Day8	1433667	Viremic	4	Late
23	ID6_DayN14	ID6	DayN14	Day0	1021381	Not Infected	0	Not Infected
25	ID6_DayN7	ID6	DayN7	Day0	1206510	Not Infected	0	Not Infected
67	ID7_Day1	ID7	Day1	Day1	1298904	Incubation	0	Incubation
62	ID7_Day2	ID7	Day2	Day2	1526168	Incubation	0	Incubation
8	ID7_Day3	ID7	Day3	Day3	1188010	Viremic	0	Ealy
15	ID7_Day4	ID7	Day4	Day4	920229	Viremic	0	Ealy
34	ID7_Day5	ID7	Day5	Day5	1192912	Viremic	1	Mid
28	ID7_DayN14	ID7	DayN14	Day0	1094765	Not Infected	0	Not Infected
61	ID7_DayN7	ID7	DayN7	Day0	1161888	Not Infected	0	Not Infected
63	ID8_Day1	ID8	Day1	Day1	1368474	Incubation	0	Incubation
27	ID8_Day2	ID8	Day2	Day2	1490359	Incubation	0	Incubation
74	ID8_Day3	ID8	Day3	Day3	2443210	Viremic	0	Ealy
73	ID8_Day4	ID8	Day4	Day4	2307488	Viremic	0	Ealy
64	ID8_Day5	ID8	Day5	Day5	1415448	Viremic	0	Ealy
51	ID8_Day6	ID8	Day6	Day6	763423	Viremic	2	Mid
24	ID8_Day7	ID8	Day7	Day7	1111728	Viremic	4	Late
7	ID8_DayN14	ID8	DayN14	Day0	960190	Not Infected	0	Not Infected
10	ID8_DayN7	ID8	DayN7	Day0	1050342	Not Infected	0	Not Infected
35	ID9_Day1	ID9	Day1	Day1	1361222	Incubation	0	Incubation
6	ID9_Day2	ID9	Day2	Day2	930895	Incubation	0	Incubation
53	ID9_Day3	ID9	Day3	Day3	744029	Viremic	0	Ealy
48	ID9_Day4	ID9	Day4	Day4	1051304	Viremic	0	Ealy
46	ID9_Day5	ID9	Day5	Day5	976582	Viremic	1	Mid
58	ID9_Day6	ID9	Day6	Day6	1091584	Viremic	4	Late
20	ID9_DayN14	ID9	DayN14	Day0	1439556	Not Infected	0	Not Infected
40	ID9_DayN7	ID9	DayN7	Day0	1671327	Not Infected	0	Not Infected

## Sheet: miRNA Raw data counts
miRNA	N Rows	ID4_Day5	ID1_Day2	ID3_Day1	ID5_DayN7	ID2_DayN14	ID9_Day2	ID8_DayN14	ID7_Day3	ID6_Day3	ID8_DayN7	ID2_Day3	ID5_Day7	ID5_DayN14	ID5_Day6	ID7_Day4	ID3_DayN14	ID2_Day6	ID2_Day4	ID1_Day3	ID9_DayN14	ID1_DayN7	ID4_Day2	ID6_DayN14	ID8_Day7	ID6_DayN7	ID4_Day3	ID8_Day2	ID7_DayN14	ID4_Day4	ID6_Day4	ID1_Day5	ID3_DayN7	ID6_Day2	ID7_Day5	ID9_Day1	ID2_Day7	ID2_Day5	ID1_Day6	ID5_Day3	ID9_DayN7	ID6_Day7	ID3_Day2	ID3_Day3	ID1_Day4	ID5_Day1	ID9_Day5	ID3_Day6	ID9_Day4
hsa_piR_000765_gb_DQ570956_Homo	8	115	12	11	23	12	20	8	35	16	10	29	43	21	100	54	21	50	50	37	19	19	20	10	98	19	29	18	24	65	21	58	19	22	142	23	86	63	32	47	16	41	21	45	41	24	45	53	34
hsa_piR_000794_gb_DQ570992_Homo	1	0	0	0	0	0	0	0	0	0	0	0	0	0	0	0	0	0	0	0	0	0	0	0	0	0	0	0	0	0	0	0	0	0	0	0	0	0	0	0	0	0	0	0	0	0	0	0	0
hsa_piR_000805_gb_DQ571003_Homo	8	30	35	26	27	24	22	15	34	13	28	15	24	64	66	30	39	95	21	31	43	32	49	21	53	26	24	45	37	32	10	32	27	46	81	35	73	39	31	39	62	44	36	28	27	37	43	52	21
hsa_piR_001042_gb_DQ571335_Homo	8	3	9	2	6	8	9	7	11	4	7	5	10	5	17	6	10	13	5	7	8	4	7	6	13	7	3	12	6	6	8	12	7	16	8	3	15	11	0	9	8	3	7	2	12	10	8	8	6
hsa_piR_001152_gb_DQ571500_Homo	8	23	12	13	15	13	14	10	24	14	14	24	34	19	33	32	18	32	15	25	22	12	20	19	37	21	18	14	37	39	29	35	10	19	15	26	66	17	16	16	18	24	30	27	19	21	24	18	25
hsa_piR_001184_gb_DQ571550_Homo	1	0	0	0	0	0	0	0	0	0	0	0	0	0	0	0	0	0	0	0	0	0	0	0	0	0	0	0	0	0	0	0	0	0	0	0	0	0	0	0	0	0	0	0	0	0	0	0	0
hsa_piR_001311_gb_DQ571812_Homo	2	0	0	0	0	0	0	0	0	0	0	0	0	0	0	0	0	0	0	0	0	0	0	0	0	0	0	0	0	0	0	0	0	0	0	0	0	0	0	0	0	0	0	0	0	0	0	0	0
hsa_piR_001312_gb_DQ571813_Homo	8	13	11	6	10	12	6	11	15	8	9	12	5	12	10	14	13	15	18	15	12	14	7	2	19	7	13	13	5	9	4	27	14	13	16	11	18	27	22	10	16	9	14	20	11	13	7	6	11
hsa_piR_002158_gb_DQ572892_Homo	7	0	0	0	0	0	0	0	0	0	0	3	6	7	6	1	11	8	1	12	5	2	9	5	5	9	4	3	13	2	6	8	3	8	7	10	13	5	2	8	2	1	4	6	16	8	4	5	2
hsa_piR_003672_gb_DQ574991_Homo	2	0	0	0	0	0	0	0	0	0	0	0	0	0	0	0	0	0	0	0	0	0	0	0	0	0	0	0	0	0	0	0	0	0	0	0	0	0	0	0	0	0	0	0	0	0	0	0	0
hsa_piR_004153_gb_DQ575660_Homo	1	0	0	0	0	0	0	0	0	0	0	0	0	0	0	0	0	0	0	0	0	0	0	0	0	0	0	0	0	0	0	0	0	0	0	0	0	0	0	0	0	0	0	0	0	0	0	0	0
hsa_piR_004307_gb_DQ575881_Homo	8	26	26	21	42	24	27	24	70	14	52	31	5	31	19	47	27	21	38	48	52	36	39	10	15	33	46	33	33	53	9	34	45	13	45	44	7	41	32	42	60	11	31	60	41	25	24	8	71
hsa_piR_004308_gb_DQ575882_Homo	8	7	12	3	13	4	9	3	25	8	9	10	5	4	4	16	13	3	18	14	11	7	7	2	3	6	21	4	7	18	1	8	9	5	9	7	2	10	8	15	5	2	3	16	7	3	7	3	13
hsa_piR_004309_gb_DQ575884_Homo	2	0	0	0	0	0	0	0	0	0	0	0	0	0	0	0	0	0	0	0	0	0	0	0	0	0	0	0	0	0	0	0	0	0	0	0	0	0	0	0	0	0	0	0	0	0	0	0	0
hsa_piR_004506_gb_DQ576200_Homo	1	0	0	0	0	0	0	0	0	0	0	0	0	0	0	0	0	0	0	0	0	0	0	0	0	0	0	0	0	0	0	0	0	0	0	0	0	0	0	0	0	0	0	0	0	0	0	0	0
hsa_piR_004721_gb_DQ576479_Homo	7	0	0	0	0	0	0	0	0	0	0	5	13	2	11	4	1	5	2	6	5	3	3	1	11	3	8	2	3	3	0	4	7	2	15	3	4	6	3	3	4	3	4	6	2	1	2	14	5
hsa_piR_004918_gb_DQ576766_Homo	1	0	0	0	0	0	0	0	0	0	0	0	0	0	0	0	0	0	0	0	0	0	0	0	0	0	0	0	0	0	0	0	0	0	0	0	0	0	0	0	0	0	0	0	0	0	0	0	0
hsa_piR_004987_gb_DQ576872_Homo	8	25	8	21	22	17	10	9	23	16	8	21	19	28	27	22	36	21	15	12	22	11	20	23	21	16	26	23	28	30	14	18	32	21	20	19	31	19	9	36	21	19	33	36	14	28	13	36	20
hsa_piR_005076_gb_DQ577008_Homo	1	0	0	0	0	0	0	0	0	0	0	0	0	0	0	0	0	0	0	0	0	0	0	0	0	0	0	0	0	0	0	0	0	0	0	0	0	0	0	0	0	0	0	0	0	0	0	0	0
hsa_piR_005799_gb_DQ577967_Homo	2	0	0	0	0	0	0	0	0	0	0	0	0	0	0	0	0	0	0	0	0	0	0	0	0	0	0	0	0	0	0	2	1	0	1	12	0	0	3	0	2	0	0	0	0	0	0	0	0
hsa_piR_008112_gb_DQ581031_Homo	8	3894	5379	5895	4563	4941	5462	3904	7062	6998	4457	4383	2577	7135	5082	5016	7597	5591	4155	6360	7331	5025	5677	5179	3842	7018	5803	7005	6534	6019	5169	6801	6407	9530	6454	8181	6245	7020	5920	5589	8688	6173	6971	7953	6964	6003	5066	5216	5508
hsa_piR_008113_gb_DQ581032_Homo	8	1445	2007	2131	1818	1653	1914	2061	2470	2272	1825	1786	1174	3145	2281	1871	3353	2246	1748	2615	2940	1907	1781	2264	1452	2441	2067	2851	2685	2147	1808	3270	2791	3872	2420	3066	2746	2696	2455	2565	3510	2501	2916	3375	2958	2535	1851	2336	2132
hsa_piR_008114_gb_DQ581033_Homo	8	37	71	53	52	41	47	43	67	51	34	32	37	84	66	57	98	56	46	55	75	61	41	55	47	53	65	76	62	50	54	85	70	70	67	80	83	68	70	61	112	70	68	90	74	52	43	62	61
hsa_piR_009511_gb_DQ582838_Homo	1	0	0	0	0	0	0	0	0	0	0	0	0	0	0	0	0	0	0	0	0	0	0	0	0	0	0	0	0	0	0	0	0	0	0	0	0	0	0	0	0	0	0	0	0	0	0	0	0
hsa_piR_010431_gb_DQ584049_Homo	1	0	0	0	0	0	0	0	0	0	0	0	0	0	0	0	0	0	0	0	0	0	0	0	0	0	0	0	0	0	0	0	0	0	0	0	0	0	0	0	0	0	0	0	0	0	0	0	0
hsa_piR_012681_gb_DQ587153_Homo	5	0	0	0	0	0	0	0	0	0	0	0	0	0	0	0	0	0	0	0	0	3	4	4	4	4	1	8	12	3	3	3	5	6	5	8	10	5	2	7	5	0	5	9	4	8	1	3	3
hsa_piR_012753_gb_DQ587269_Homo	1	0	0	0	0	0	0	0	0	0	0	0	0	0	0	0	0	0	0	0	0	0	0	0	0	0	0	0	0	0	0	0	0	0	0	0	0	0	0	0	0	0	0	0	0	0	0	0	0
hsa_piR_015026_gb_DQ590548_Homo	1	0	0	0	0	0	0	0	0	0	0	0	0	0	0	0	0	0	0	0	0	0	0	0	0	0	0	0	0	0	0	0	0	0	0	0	0	0	0	0	0	0	0	0	0	0	0	0	0
hsa_piR_015249_gb_DQ590830_Homo	2	0	0	0	0	0	0	0	0	0	0	0	0	0	0	0	0	0	0	0	0	0	0	0	0	0	0	0	0	0	0	0	0	0	0	0	0	0	0	0	0	0	0	0	0	0	0	0	0
hsa_piR_015254_gb_DQ590835_Homo	1	0	0	0	0	0	0	0	0	0	0	0	0	0	0	0	0	0	0	0	0	0	0	0	0	0	0	0	0	0	0	0	0	0	0	0	0	0	0	0	0	0	0	0	0	0	0	0	0
hsa_piR_016440_gb_DQ592393_Homo	8	0	1	2	0	0	12	7	18	1	10	0	1	1	3	14	12	0	0	0	33	2	0	0	8	1	0	8	20	0	1	0	14	1	16	31	0	0	0	0	30	1	11	8	0	0	15	5	20
hsa_piR_016658_gb_DQ592931_Homo	8	52	40	28	56	34	14	71	77	90	50	54	128	89	121	60	71	76	60	114	44	61	18	53	64	60	57	70	39	56	78	156	62	69	78	42	81	65	121	125	46	62	34	104	97	55	50	51	54
hsa_piR_016659_gb_DQ592932_Homo	8	92	24	18	26	18	9	49	45	42	33	39	167	46	171	38	27	99	46	41	30	33	5	27	80	53	45	34	19	42	46	80	26	39	93	30	172	56	38	73	19	61	17	49	62	47	87	80	43
hsa_piR_016677_gb_DQ592953_Homo	8	15	13	7	16	4	14	2	13	3	11	6	10	13	8	18	10	13	16	11	7	9	14	4	14	13	13	20	9	15	5	12	12	9	13	16	18	15	18	16	15	5	11	11	9	6	13	11	19
hsa_piR_016735_gb_DQ593039_Homo	8	5	6	5	9	2	9	6	10	2	9	2	4	12	8	6	14	10	7	8	15	7	9	1	4	11	14	8	6	12	5	19	5	9	8	21	8	4	11	7	6	5	14	17	8	12	6	8	13
hsa_piR_016742_gb_DQ593049_Homo	8	13	7	2	15	4	7	2	13	1	16	1	13	7	10	6	9	10	8	4	6	9	11	0	13	8	11	11	6	7	4	4	15	2	14	4	13	9	6	9	13	3	13	3	8	5	8	16	8
hsa_piR_016745_gb_DQ593052_Homo	5	5	4	2	7	2	10	1	7	3	14	0	0	0	0	0	0	0	0	0	0	0	0	0	0	0	0	0	0	0	0	6	6	4	6	4	0	4	0	5	11	0	0	0	0	0	0	0	0
hsa_piR_016792_gb_DQ593109_Homo	1	0	0	0	0	0	0	0	0	0	0	0	0	0	0	0	0	0	0	0	0	0	0	0	0	0	0	0	0	0	0	0	0	0	0	0	0	0	0	0	0	0	0	0	0	0	0	0	0
hsa_piR_016945_gb_DQ593356_Homo	3	0	0	0	0	0	0	0	0	0	0	0	0	0	0	0	0	0	0	0	0	4	2	1	11	4	3	1	1	4	1	1	1	1	10	1	3	1	1	2	2	0	0	0	0	0	0	0	0
hsa_piR_016946_gb_DQ593358_Homo	8	13	31	13	31	13	26	18	45	24	21	26	19	28	26	49	27	24	40	35	30	33	32	6	31	28	54	25	35	59	14	36	24	28	39	32	33	39	35	41	29	9	22	47	38	28	25	18	34
hsa_piR_017033_gb_DQ593538_Homo	8	14	12	14	15	15	8	10	24	19	13	10	11	30	27	15	21	14	11	26	19	10	13	4	24	11	14	22	30	13	10	17	16	22	18	12	40	14	11	17	14	6	23	12	18	12	11	13	5
hsa_piR_017104_gb_DQ593636_Homo	1	0	0	0	0	0	0	0	0	0	0	0	0	0	0	0	0	0	0	0	0	0	0	0	0	0	0	0	0	0	0	0	0	0	0	0	0	0	0	0	0	0	0	0	0	0	0	0	0
hsa_piR_017458_gb_DQ594126_Homo	2	0	0	0	0	0	0	0	0	0	0	0	0	0	0	0	0	0	0	0	0	0	0	0	0	0	0	0	0	0	0	0	0	0	0	0	0	0	0	0	0	0	0	0	0	0	0	0	0
hsa_piR_017716_gb_DQ594453_Homo	8	22	14	20	32	14	21	20	34	20	31	30	21	36	21	35	28	40	29	36	13	31	34	15	27	30	30	31	23	40	20	26	32	34	25	25	30	33	23	36	44	15	26	32	21	32	17	16	29
hsa_piR_017723_gb_DQ594464_Homo	6	7	3	2	1	1	2	2	11	5	6	3	1	2	2	5	1	2	2	10	5	4	5	3	1	5	15	4	2	7	3	0	0	0	0	0	0	0	0	0	0	0	0	0	0	0	0	0	0
hsa_piR_017724_gb_DQ594465_Homo	8	39	35	39	47	54	30	23	141	40	61	69	5	43	9	117	32	42	56	72	72	41	55	11	27	32	133	34	41	118	37	52	68	20	62	86	13	90	59	77	63	7	71	84	42	34	44	8	109
hsa_piR_017936_gb_DQ594740_Homo	2	0	0	0	0	0	0	0	0	0	0	0	0	0	0	0	0	0	0	0	0	0	0	0	0	0	0	0	0	0	0	0	0	0	0	0	0	0	0	0	0	0	0	0	0	0	0	0	0
hsa_piR_018570_gb_DQ595536_Homo	8	47	33	31	59	41	21	20	64	23	41	52	22	51	28	66	56	50	67	76	24	40	33	18	53	55	54	25	35	64	22	79	55	25	71	54	24	121	63	57	66	18	68	69	75	50	32	15	61
hsa_piR_018849_gb_DQ595899_Homo	8	4	23	7	1	2	7	12	4	5	3	1	0	5	4	8	8	6	4	16	8	23	2	9	3	5	1	10	9	8	9	25	3	8	9	8	10	9	19	6	6	14	3	12	35	1	5	12	5
hsa_piR_019420_gb_DQ596670_Homo	8	56	3	1	0	3	2	1	2	1	0	2	101	1	626	31	0	212	3	4	0	0	1	0	38	2	1	1	1	32	1	3	2	1	99	1	175	7	0	1	1	66	3	1	0	3	91	75	1
hsa_piR_019675_gb_DQ596992_Homo	1	0	0	0	0	0	0	0	0	0	0	0	0	0	0	0	0	0	0	0	0	0	0	0	0	0	0	0	0	0	0	0	0	0	0	0	0	0	0	0	0	0	0	0	0	0	0	0	0
hsa_piR_019676_gb_DQ596993_Homo	1	0	0	0	0	0	0	0	0	0	0	0	0	0	0	0	0	0	0	0	0	0	0	0	0	0	0	0	0	0	0	0	0	0	0	0	0	0	0	0	0	0	0	0	0	0	0	0	0
hsa_piR_019752_gb_DQ597110_Homo	6	0	0	0	0	0	0	0	0	0	0	0	18	1	22	0	1	8	1	1	2	0	2	1	40	0	2	2	1	3	0	0	2	0	5	1	15	0	1	0	0	19	1	0	1	1	6	15	2
hsa_piR_019912_gb_DQ597341_Homo	8	3	5	5	6	4	3	4	15	3	2	2	6	20	3	3	5	1	4	16	9	15	2	5	5	6	10	4	6	3	3	27	7	1	5	5	4	3	15	20	6	2	5	14	19	10	5	6	2
hsa_piR_019914_gb_DQ597347_Homo	8	37	14	8	13	6	11	4	21	10	25	13	29	16	46	19	20	19	11	19	16	14	20	3	30	18	17	14	21	27	5	12	24	16	42	16	25	16	23	28	23	25	23	21	15	18	11	21	17
hsa_piR_019951_gb_DQ597403_Homo	4	0	0	0	0	0	0	0	0	0	0	0	0	0	0	0	0	0	0	0	0	2	5	1	14	4	8	7	5	10	0	0	0	0	0	0	0	0	0	0	0	0	0	0	0	0	0	0	0
hsa_piR_020326_gb_DQ597916_Homo	8	9	7	4	13	8	7	4	22	9	8	13	7	13	14	19	7	23	19	14	7	6	4	10	13	19	16	5	4	11	2	11	9	9	17	13	11	30	15	17	13	7	11	16	7	11	11	12	13
hsa_piR_020365_gb_DQ597975_Homo	8	22	1	7	1	2	3	2	11	5	4	5	43	4	60	11	7	15	3	5	5	4	4	2	25	5	7	5	9	17	4	3	5	2	19	4	26	2	2	7	4	34	10	4	6	3	6	23	6
hsa_piR_020381_gb_DQ597997_Homo	1	0	0	0	0	0	0	0	0	0	0	0	0	0	0	0	0	0	0	0	0	0	0	0	0	0	0	0	0	0	0	0	0	0	0	0	0	0	0	0	0	0	0	0	0	0	0	0	0
hsa_piR_020450_gb_DQ598104_Homo	8	0	6	11	8	4	8	5	13	15	6	4	0	17	1	6	7	6	8	6	10	5	17	5	0	19	9	7	19	14	4	10	6	17	6	5	4	11	0	11	12	1	6	9	13	10	2	1	4
hsa_piR_020485_gb_DQ598159_Homo	1	0	0	0	0	0	0	0	0	0	0	0	0	0	0	0	0	0	0	0	0	0	0	0	0	0	0	0	0	0	0	0	0	0	0	0	0	0	0	0	0	0	0	0	0	0	0	0	0
hsa_piR_020492_gb_DQ598170_Homo	1	0	0	0	0	0	0	0	0	0	0	0	0	0	0	0	0	0	0	0	0	0	0	0	0	0	0	0	0	0	0	0	0	0	0	0	0	0	0	0	0	0	0	0	0	0	0	0	0
hsa_piR_020496_gb_DQ598175_Homo	8	29	12	17	15	20	18	12	38	11	16	19	10	21	20	32	26	11	19	16	22	15	19	8	10	17	28	24	20	60	17	28	16	17	39	36	23	24	26	32	23	12	14	32	27	26	20	17	30
hsa_piR_020499_gb_DQ598183_Homo	2	0	0	0	0	0	0	0	0	0	0	0	0	0	0	0	0	0	0	0	0	0	0	0	0	0	0	0	0	0	0	0	2	2	4	2	12	1	0	2	0	0	0	0	0	0	0	0	0
hsa_piR_020500_gb_DQ598190_Homo	2	0	0	0	0	0	0	0	0	0	0	0	0	0	0	0	0	0	0	0	0	0	0	0	0	0	0	0	0	0	0	0	0	0	0	0	0	0	0	0	0	0	0	0	0	0	0	0	0
hsa_piR_020813_gb_DQ598646_Homo	8	8	16	16	22	16	20	13	21	21	16	11	12	40	21	16	34	9	16	16	26	10	14	21	13	30	5	12	33	15	23	28	11	27	7	13	21	6	11	20	21	7	15	16	27	25	9	7	7
hsa_piR_020815_gb_DQ598651_Homo	1	0	0	0	0	0	0	0	0	0	0	0	0	0	0	0	0	0	0	0	0	0	0	0	0	0	0	0	0	0	0	0	0	0	0	0	0	0	0	0	0	0	0	0	0	0	0	0	0
hsa_piR_020893_gb_DQ598752_Homo	8	7	2	1	1	3	4	0	10	0	1	8	6	5	6	6	3	12	7	4	3	1	2	2	10	1	4	3	2	10	3	2	0	2	5	2	10	14	9	4	4	3	2	6	1	6	6	13	5
hsa_piR_021032_gb_DQ598918_Homo	8	21	21	17	27	17	21	16	34	26	23	32	16	49	16	22	48	50	41	32	29	36	27	49	56	34	38	45	18	33	26	27	29	41	27	32	27	48	27	20	29	15	40	48	27	44	26	27	30
hsa_piR_021462_gb_DQ599459_Homo	8	18	34	28	28	27	22	51	45	41	40	51	14	73	22	41	77	70	53	57	48	52	31	75	95	69	53	91	57	46	34	35	55	45	32	38	21	43	48	28	63	24	43	66	28	40	24	24	30
hsa_piR_023279_gb_DQ601838_Homo	1	0	0	0	0	0	0	0	0	0	0	0	0	0	0	0	0	0	0	0	0	0	0	0	0	0	0	0	0	0	0	0	0	0	0	0	0	0	0	0	0	0	0	0	0	0	0	0	0
hsa_let_7a_3p	8	18	15	11	10	17	14	8	12	18	7	13	2	23	9	8	20	14	12	16	11	16	18	10	26	20	13	11	18	10	11	9	18	27	18	27	16	25	13	13	17	14	31	18	17	10	10	11	12
hsa_let_7a_5p	8	42047	57366	63801	58354	46988	55593	60728	67720	68210	55494	52776	36469	108855	74845	51169	99656	67166	49540	71504	89443	51260	49960	61911	41289	68408	58157	84780	62076	58585	52422	88011	75690	101017	64802	82170	71950	70375	64379	77092	93873	68757	77843	94366	75440	77273	51682	61124	60248
hsa_let_7b_3p	8	8	14	10	4	8	7	7	11	13	7	7	4	21	15	8	11	16	12	15	20	9	12	12	13	14	14	18	12	11	3	15	11	20	10	19	21	15	12	15	17	11	9	16	19	19	7	10	10
hsa_let_7b_5p	8	8701	14534	15783	18083	11740	14700	17838	12829	11675	14782	12203	9585	33819	20802	10142	25344	16328	11111	16484	23717	13554	12606	12789	10427	13731	12408	22105	13507	12244	10142	22373	20356	20402	13292	21023	16734	16116	14804	20300	23965	14491	19695	22609	18726	20249	12265	15857	14425
hsa_let_7c_5p	8	590	580	582	650	518	587	535	558	740	544	596	626	1214	1036	464	906	836	574	791	935	524	504	575	746	660	612	792	511	649	548	951	665	1011	729	916	923	897	750	929	961	826	709	885	841	1005	676	760	613
hsa_let_7d_3p	8	34	58	47	37	34	32	40	46	67	43	21	25	55	53	62	57	53	53	68	51	54	20	75	55	58	52	79	31	46	54	83	28	69	53	45	67	58	37	60	52	36	49	55	81	53	41	38	41
hsa_let_7d_5p	8	1532	2737	2535	2559	2062	2357	3135	3056	3131	3000	2444	1210	4910	3226	2346	4289	4029	2343	3410	3741	2316	2312	3062	1345	3388	2406	4755	2748	2535	2363	3995	3104	5122	2626	3419	3435	3435	3104	3919	4104	2719	3213	3806	3266	3566	2175	2146	2628
hsa_let_7e_5p	8	23	22	27	30	18	14	22	45	34	20	27	24	42	42	31	34	29	24	35	23	11	23	28	18	27	20	31	28	26	18	51	33	66	35	30	49	38	39	38	30	37	35	51	55	47	20	33	25
hsa_let_7f_1_3p	2	0	0	0	0	0	0	0	0	0	0	0	0	0	0	0	0	0	0	0	0	0	0	0	0	0	0	0	0	0	0	0	0	0	0	0	0	0	0	0	0	0	0	0	0	0	0	0	0
hsa_let_7f_2_3p	1	0	0	0	0	0	0	0	0	0	0	0	0	0	0	0	0	0	0	0	0	0	0	0	0	0	0	0	0	0	0	0	0	0	0	0	0	0	0	0	0	0	0	0	0	0	0	0	0
hsa_let_7f_5p	8	68777	82534	98043	90727	80175	88225	77098	106080	103560	91342	71659	58518	145973	101427	77480	131044	96410	68138	98419	123744	74640	98761	75611	84390	105150	96338	143473	96191	100350	80411	100434	102918	134716	95706	120541	104835	110565	88841	108743	141179	100201	115272	123885	106150	116971	85395	87960	85612
hsa_let_7g_3p	8	5	3	3	5	4	9	9	4	2	11	6	6	11	5	7	11	7	6	7	8	3	11	8	9	6	3	16	7	3	3	4	10	11	20	8	9	8	1	2	15	2	15	7	10	8	4	10	5
hsa_let_7g_5p	8	11112	13045	12565	13684	11429	11674	11163	16169	14583	13739	13078	12054	22000	18509	12223	20523	19090	13338	14684	15382	11956	10396	12190	15183	14896	11127	19831	13915	12525	9289	14213	15857	19444	16487	17514	17934	19511	13492	18902	19824	13674	17625	18820	12154	19633	9540	15125	11707
hsa_let_7i_3p	8	15	8	18	10	13	10	11	16	14	23	8	7	11	8	10	15	23	5	19	13	9	8	9	30	9	11	42	14	8	9	21	20	19	18	20	19	16	14	19	20	12	23	20	9	15	13	21	18
hsa_let_7i_5p	8	10945	17328	18607	18669	13115	17114	25316	16786	17987	24790	10950	10325	31795	18044	12997	29735	17463	9854	20325	27880	16040	17733	19497	23763	22418	15786	39004	18692	16009	18467	24637	23318	28353	14848	23547	14696	15197	18677	21838	29894	21598	21472	24847	23311	22609	16460	15996	15722
hsa_miR_100_5p	5	0	0	0	0	0	0	0	0	0	0	0	16	1	22	1	2	3	1	6	1	1	2	0	52	0	2	0	4	1	3	8	0	4	28	1	9	1	3	1	1	7	0	1	5	1	1	22	3
hsa_miR_101_3p	8	9286	4010	4755	4167	4224	3688	3232	6743	3871	5164	4477	4762	6055	6693	5738	6394	8486	4918	5800	5128	3807	5389	3662	15940	4853	6708	9093	4260	7840	3740	4452	5055	6413	9670	6770	7073	9469	4565	7043	8027	4288	8466	7089	5075	8764	6469	7499	5769
hsa_miR_101_5p	8	24	8	13	5	7	4	7	11	8	9	2	8	10	14	17	10	19	14	10	12	5	15	4	45	7	20	35	13	22	9	12	15	13	20	14	18	25	8	22	21	10	17	12	10	23	15	19	14
hsa_miR_103a_2_5p	3	0	0	0	0	0	0	0	0	0	0	1	24	0	29	0	2	1	0	0	2	0	0	0	0	0	0	0	0	0	0	0	0	0	0	0	0	0	0	0	0	0	0	0	0	0	0	0	0
hsa_miR_103a_3p	8	9282	8384	7131	8555	6672	7695	7210	7876	6031	8338	5735	7727	13519	16280	6873	12460	15612	6192	9176	12065	7379	8097	7107	8061	8761	7715	12827	8079	8288	6760	11256	9663	12165	10035	10615	16231	8789	7799	12002	13348	14826	9269	10107	11292	9962	9188	11778	8027
hsa_miR_103b	8	324	303	278	302	292	287	245	301	258	318	207	247	424	467	264	441	526	225	285	354	406	452	424	421	541	457	679	465	485	358	345	318	438	339	386	519	322	235	398	445	481	298	354	388	316	312	367	283
hsa_miR_106a_3p	1	0	0	0	0	0	0	0	0	0	0	0	0	0	0	0	0	0	0	0	0	0	0	0	0	0	0	0	0	0	0	0	0	0	0	0	0	0	0	0	0	0	0	0	0	0	0	0	0
hsa_miR_106a_5p	8	70	86	98	91	100	99	110	136	109	97	158	55	170	103	147	217	219	148	177	174	159	90	211	179	187	142	204	223	152	129	134	143	155	124	141	113	138	158	119	203	121	192	252	119	171	114	151	140
hsa_miR_106b_3p	8	1054	1937	1596	2311	1738	2028	1697	1795	1210	1824	1289	1169	4442	2198	1578	3002	2953	1314	2089	3318	2018	2186	2006	1489	2199	1488	3198	2457	1613	1611	2626	2267	3136	1437	2645	2067	1613	1585	2690	3680	1999	2069	1878	2362	2371	1518	1380	1791
hsa_miR_106b_5p	8	76	89	83	94	90	70	101	125	115	111	124	45	135	77	111	143	177	108	131	95	81	83	98	186	110	122	152	96	92	73	103	109	158	129	132	115	216	114	157	205	51	152	157	67	132	85	109	93
hsa_miR_107	8	2071	2129	2058	2451	2094	2135	1709	2371	1994	1863	1912	1815	4151	3746	2103	3896	4309	2080	2717	3485	2007	2153	2515	1645	2773	2339	2984	2391	2561	2076	2870	2722	3777	2414	2794	3780	2707	2148	3202	3580	3093	2510	2930	2531	2807	2154	2446	2204
hsa_miR_10a_3p	4	0	0	0	0	0	0	0	0	0	0	2	21	3	25	0	3	2	2	1	2	0	0	0	0	0	0	0	0	0	0	1	1	1	4	3	13	1	0	1	4	1	3	1	2	2	0	10	0
hsa_miR_10a_5p	8	121	11	19	22	20	22	16	29	29	15	23	221	27	326	24	19	55	29	23	35	9	19	20	148	23	19	15	15	24	10	21	24	39	29	23	114	23	17	29	25	34	20	30	17	23	21	135	20
hsa_miR_10b_3p	2	0	0	0	0	0	0	0	0	0	0	2	8	1	13	1	0	4	0	0	1	0	0	0	0	0	0	0	0	0	0	0	0	0	0	0	0	0	0	0	0	0	0	0	0	0	0	0	0
hsa_miR_10b_5p	8	100	3	2	4	0	6	3	4	2	3	1	160	4	239	4	1	24	0	4	1	3	1	3	208	5	2	2	3	10	1	3	3	2	17	2	113	2	2	8	9	27	9	2	3	6	9	150	4
hsa_miR_1180_3p	8	38	65	48	103	64	44	69	129	125	53	86	35	185	71	68	61	83	65	148	75	65	58	87	48	107	110	89	58	89	100	141	61	189	53	63	60	78	89	154	84	68	59	93	150	108	57	31	87
hsa_miR_1180_5p	1	0	0	0	0	0	0	0	0	0	0	0	0	0	0	0	0	0	0	0	0	0	0	0	0	0	0	0	0	0	0	0	0	0	0	0	0	0	0	0	0	0	0	0	0	0	0	0	0
hsa_miR_1185_1_3p	1	0	0	0	0	0	0	0	0	0	0	0	0	0	0	0	0	0	0	0	0	0	0	0	0	0	0	0	0	0	0	0	0	0	0	0	0	0	0	0	0	0	0	0	0	0	0	0	0
hsa_miR_1185_5p	1	0	0	0	0	0	0	0	0	0	0	0	0	0	0	0	0	0	0	0	0	0	0	0	0	0	0	0	0	0	0	0	0	0	0	0	0	0	0	0	0	0	0	0	0	0	0	0	0
hsa_miR_1199_5p	7	0	0	0	0	0	0	0	0	0	0	11	4	2	2	8	7	5	8	14	2	3	5	5	2	7	12	3	0	8	7	14	4	3	4	2	3	12	14	10	3	2	4	19	14	6	5	1	10
hsa_miR_122_3p	1	0	0	0	0	0	0	0	0	0	0	0	0	0	0	0	0	0	0	0	0	0	0	0	0	0	0	0	0	0	0	0	0	0	16	0	0	0	0	0	0	0	0	0	0	0	0	0	0
hsa_miR_122_5p	8	3595	65	17	10	63	23	16	10	20	20	5	6735	83	5805	61	17	603	8	60	31	55	17	106	11629	26	16	8	31	55	17	165	11	41	38536	48	2160	49	65	51	130	6673	14	27	156	115	287	7173	23
hsa_miR_1226_3p	7	3	3	0	1	2	0	5	6	12	1	4	1	10	2	9	6	10	5	16	7	0	0	0	0	0	0	0	0	0	0	21	3	4	3	0	5	11	11	7	2	6	3	5	13	0	0	5	6
hsa_miR_1246	4	0	0	0	0	0	0	0	0	0	0	0	93	0	40	0	1	1	0	1	1	0	0	0	49	0	0	1	1	0	0	0	0	0	0	0	0	0	0	0	0	1	0	0	0	0	0	61	0
hsa_miR_1249_3p	1	0	0	0	0	0	0	0	0	0	0	0	0	0	0	0	0	0	0	0	0	0	0	0	0	0	0	0	0	0	0	0	0	0	0	0	0	0	0	0	0	0	0	0	0	0	0	0	0
hsa_miR_1255a	8	6	27	13	21	32	19	27	17	19	24	30	4	28	19	12	24	55	14	22	25	24	15	17	5	8	14	30	14	16	9	22	18	19	9	31	32	39	20	28	32	6	20	18	21	21	17	5	19
hsa_miR_1255b_5p	8	8	25	17	26	17	17	15	28	26	12	17	8	47	21	16	18	27	23	37	38	18	16	23	5	33	11	23	19	15	15	32	16	27	30	22	40	32	23	29	39	14	13	19	39	30	17	11	23
hsa_miR_125a_5p	8	149	19	25	20	16	4	9	59	73	11	26	182	49	363	47	27	67	20	61	15	26	16	26	140	33	37	16	29	45	65	70	23	53	45	12	186	26	39	53	17	66	25	54	63	54	24	120	14
hsa_miR_125b_2_3p	2	0	0	0	0	0	0	0	0	0	0	0	10	2	7	2	5	3	0	0	2	3	1	0	10	0	0	0	1	0	0	0	0	0	0	0	0	0	0	0	0	0	0	0	0	0	0	0	0
hsa_miR_125b_5p	8	96	37	41	28	21	15	30	42	48	16	31	145	77	201	66	46	102	51	74	40	56	11	29	210	37	36	37	14	69	50	114	57	50	353	38	162	45	59	92	60	146	64	85	103	63	66	172	60
hsa_miR_1260a	8	11	11	5	10	13	10	5	21	13	6	18	1	14	7	10	12	21	12	26	15	12	8	10	6	9	17	16	7	13	7	16	13	16	9	13	13	11	25	23	26	7	7	22	27	5	14	3	9
hsa_miR_1260b	8	6	25	11	30	33	12	14	41	20	9	70	4	29	4	18	25	23	64	50	40	24	24	26	8	22	39	17	28	16	22	58	23	23	8	28	8	28	52	72	41	6	21	37	41	17	15	8	23
hsa_miR_1262	8	22	21	5	11	14	11	2	24	8	12	14	2	13	25	21	5	32	19	17	10	12	39	6	16	8	44	29	18	78	9	17	3	21	16	11	17	34	12	22	8	5	13	11	31	10	26	3	35
hsa_miR_126_3p	8	8636	5375	6745	7380	5130	5510	5528	9255	7224	7199	5879	8370	10376	12921	7484	9194	8905	5759	7677	7645	5472	5923	6755	8599	8853	8307	12471	8215	7153	6943	8061	7536	11599	7339	8333	9082	6403	6251	10460	9422	6828	9436	10116	7310	11022	3063	6635	5204
hsa_miR_126_5p	8	1132	530	487	544	402	483	390	906	742	545	471	1046	754	1542	678	805	1078	516	669	600	474	647	557	1466	747	706	915	683	662	599	772	562	1053	792	635	1129	619	570	868	788	726	967	754	646	883	356	830	487
hsa_miR_1268a	1	0	0	0	0	0	0	0	0	0	0	0	0	0	0	0	0	0	0	0	0	0	0	0	0	0	0	0	0	0	0	0	0	0	0	0	0	0	0	0	0	0	0	0	0	0	0	0	0
hsa_miR_1271_5p	8	5	15	5	15	13	12	7	7	10	6	6	3	18	16	5	12	21	8	20	14	13	12	8	6	18	13	6	8	8	7	19	15	8	4	12	10	6	8	16	22	7	8	3	24	13	14	4	14
hsa_miR_1273c	2	0	0	0	0	0	0	0	0	0	0	0	0	0	0	0	0	0	0	0	0	0	0	0	0	0	0	0	0	0	0	4	3	5	19	0	8	3	0	1	2	0	0	0	0	0	0	0	0
hsa_miR_127_3p	8	51	64	35	87	31	72	73	77	40	72	39	45	129	61	57	65	62	44	93	110	46	83	56	26	58	94	102	61	73	49	105	47	79	20	74	70	43	68	140	117	29	64	63	123	104	25	25	64
hsa_miR_127_5p	1	0	0	0	0	0	0	0	0	0	0	0	0	0	0	0	0	0	0	0	0	0	0	0	0	0	0	0	0	0	0	0	0	0	0	0	0	0	0	0	0	0	0	0	0	0	0	0	0
hsa_miR_1277_3p	2	0	0	0	0	0	0	0	0	0	0	0	0	0	0	0	0	0	0	0	0	1	0	1	12	0	3	1	0	1	1	0	0	0	0	0	0	0	0	0	0	0	0	0	0	0	0	0	0
hsa_miR_1277_5p	8	41	12	16	13	9	13	16	32	18	18	19	21	23	28	22	16	30	15	18	17	14	11	20	66	19	25	38	15	26	13	14	18	16	50	27	26	32	13	28	25	17	24	19	20	34	24	30	23
hsa_miR_128_1_5p	1	0	0	0	0	0	0	0	0	0	0	0	0	0	0	0	0	0	0	0	0	0	0	0	0	0	0	0	0	0	0	0	0	0	0	0	0	0	0	0	0	0	0	0	0	0	0	0	0
hsa_miR_128_3p	8	852	1062	1129	1150	972	730	1296	1557	1460	1061	1083	688	1942	1367	1275	1584	1535	1255	1814	1428	1214	805	1215	1142	1404	1569	1661	1096	1547	1399	2224	1270	1820	1024	1080	1468	1479	1512	1827	1340	1115	1167	1914	2118	1706	958	1030	1260
hsa_miR_1285_3p	4	0	0	0	0	0	0	0	0	0	0	5	3	5	9	4	7	10	4	3	4	0	0	0	0	0	0	0	0	0	0	10	5	5	5	3	7	2	4	10	1	0	0	0	0	0	0	0	0
hsa_miR_1292_5p	7	13	1	3	3	0	1	0	4	0	0	3	5	0	11	4	0	2	1	1	1	0	0	0	0	0	0	0	0	0	0	6	5	1	4	5	6	13	2	3	7	2	5	3	2	3	6	16	2
hsa_miR_1294	2	0	0	0	0	0	0	0	0	0	0	0	0	0	0	0	0	0	0	0	0	0	0	0	0	0	0	0	0	0	0	0	0	0	0	0	0	0	0	0	0	0	0	0	0	0	0	0	0
hsa_miR_1296_5p	8	9	18	9	21	17	17	20	16	17	11	14	13	37	19	17	33	32	24	28	17	28	12	21	16	28	26	23	19	20	15	24	17	38	13	18	17	18	20	24	28	16	17	20	35	21	12	19	23
hsa_miR_1301_3p	5	5	4	3	4	3	2	11	13	11	3	0	0	0	0	0	0	0	0	0	0	0	0	0	0	0	0	0	0	0	0	1	3	4	6	5	3	5	4	12	6	0	0	0	0	0	0	0	0
hsa_miR_1303	8	24	31	15	8	9	16	11	23	5	16	9	19	19	35	35	17	48	8	17	23	17	13	21	27	24	10	33	27	14	16	12	19	29	74	25	48	19	14	14	33	17	23	12	17	12	27	27	14
hsa_miR_1304_3p	8	9	23	28	124	81	28	55	66	69	63	95	54	230	101	60	56	178	100	41	30	24	21	59	28	50	19	107	75	18	58	48	40	141	63	41	96	152	31	175	62	59	41	45	32	160	28	18	25
hsa_miR_1304_5p	8	4	16	10	43	31	8	18	28	40	15	24	14	72	41	22	21	28	24	18	16	9	6	28	13	35	10	22	31	2	25	15	17	44	28	10	36	44	20	64	22	32	15	14	17	51	4	5	4
hsa_miR_1306_3p	5	0	0	0	0	0	0	0	0	0	0	6	1	11	3	6	2	4	5	6	7	0	0	0	0	0	0	0	0	0	0	12	2	9	3	4	5	9	5	6	7	0	0	0	0	0	0	0	0
hsa_miR_1306_5p	8	3	13	12	11	10	2	11	8	26	12	11	12	25	8	8	11	8	7	22	16	19	10	14	5	18	21	15	14	9	12	25	9	17	5	9	10	9	21	22	21	7	12	22	31	21	6	3	7
hsa_miR_1307_3p	8	118	176	100	121	480	143	289	188	243	172	525	59	321	123	164	156	707	435	314	352	293	171	194	220	240	218	295	206	240	157	388	139	319	158	255	520	713	300	209	343	216	86	122	347	183	163	70	216
hsa_miR_1307_5p	8	54	23	18	18	9	23	16	42	14	31	20	21	30	42	36	20	51	20	26	13	21	28	17	79	22	20	31	19	42	20	17	17	23	43	31	29	44	29	18	42	17	24	16	12	30	26	25	25
hsa_miR_130a_3p	8	21	6	9	9	8	2	10	9	17	14	12	42	12	47	7	14	21	7	18	18	12	6	17	35	18	13	21	12	7	20	14	13	20	17	12	18	16	10	16	8	23	16	15	17	29	8	20	10
hsa_miR_130b_3p	8	13	24	13	22	12	25	8	17	25	11	12	26	38	41	11	30	24	12	21	25	14	10	21	10	21	13	17	14	11	20	31	18	35	13	19	30	17	29	28	46	16	22	8	26	20	11	24	27
hsa_miR_130b_5p	3	0	0	0	0	0	0	0	0	0	0	0	0	0	0	0	0	0	0	0	0	0	0	0	0	0	0	0	0	0	0	5	4	6	0	4	0	7	4	12	5	0	0	0	0	0	0	0	0
hsa_miR_132_3p	8	14	7	12	10	11	6	11	9	17	11	9	9	16	26	12	21	18	10	10	14	6	14	7	18	11	15	15	7	11	8	13	6	17	15	9	8	12	9	18	10	11	6	14	6	7	15	14	7
hsa_miR_132_5p	1	0	0	0	0	0	0	0	0	0	0	0	0	0	0	0	0	0	0	0	0	0	0	0	0	0	0	0	0	0	0	0	0	0	0	0	0	0	0	0	0	0	0	0	0	0	0	0	0
hsa_miR_133a_3p	6	11	0	1	1	1	8	2	4	3	2	5	61	6	11	10	6	6	2	4	5	5	3	10	12	4	2	1	2	13	1	0	0	0	0	0	0	0	0	0	0	7	3	1	0	2	2	21	6
hsa_miR_134_5p	8	31	18	13	36	11	27	25	29	16	34	22	21	29	43	20	27	35	18	20	37	13	40	22	20	34	47	46	25	35	17	36	21	28	13	32	28	13	18	45	33	11	14	23	22	35	12	13	11
hsa_miR_135a_5p	2	0	0	0	0	0	0	0	0	0	0	0	0	0	0	0	0	0	0	0	0	0	0	0	0	0	0	0	0	0	0	0	0	0	0	0	0	0	0	0	0	0	0	0	0	0	0	0	0
hsa_miR_136_3p	5	10	0	6	1	1	2	1	7	1	5	0	0	0	0	0	0	0	0	0	0	4	10	1	13	5	5	9	2	5	2	0	0	0	0	0	0	0	0	0	0	1	4	3	4	9	4	4	6
hsa_miR_136_5p	1	0	0	0	0	0	0	0	0	0	0	0	0	0	0	0	0	0	0	0	0	0	0	0	0	0	0	0	0	0	0	0	0	0	0	0	0	0	0	0	0	0	0	0	0	0	0	0	0
hsa_miR_138_2_3p	5	0	0	0	0	0	0	0	0	0	0	6	0	11	5	0	19	6	4	3	0	5	2	1	4	3	0	15	10	1	2	0	0	0	0	0	0	0	0	0	0	0	0	0	0	0	0	0	0
hsa_miR_138_5p	8	8	21	33	28	14	5	67	11	6	79	12	19	50	32	8	88	27	11	20	7	28	9	7	55	11	10	108	17	8	6	11	62	8	13	9	22	21	9	32	9	8	61	45	16	30	4	27	4
hsa_miR_139_3p	2	0	0	0	0	0	0	0	0	0	0	0	0	0	0	0	0	0	0	0	0	0	0	0	0	0	0	0	0	0	0	0	0	0	0	0	0	0	0	0	0	0	0	0	0	0	0	0	0
hsa_miR_139_5p	6	10	0	0	2	4	4	4	3	4	4	1	2	1	11	2	6	5	5	1	1	0	7	4	12	3	8	9	4	2	1	0	0	0	0	0	0	0	0	0	0	3	2	2	0	4	0	4	1
hsa_miR_1_3p	8	50	1	7	4	16	5	18	40	13	15	18	121	22	32	30	10	26	12	14	12	7	11	37	44	18	19	10	5	39	31	7	2	12	36	9	58	31	6	31	22	22	10	13	1	22	8	28	15
hsa_miR_140_3p	8	6028	7406	5535	7058	5750	5881	5238	6036	2869	6194	3785	5996	10248	13103	5231	8715	13660	4499	6242	9312	6126	6708	4916	7134	7012	4280	10438	6970	5470	3925	7653	6742	7337	8108	6909	14118	6748	5762	7966	10882	9288	7705	5725	10246	7671	6460	8007	5559
hsa_miR_140_5p	8	219	192	241	238	253	184	208	322	292	231	349	156	413	272	296	355	442	390	401	298	232	188	239	406	287	243	356	259	331	196	251	282	356	414	420	255	608	320	427	469	161	380	363	222	496	242	194	277
hsa_miR_141_3p	8	21	5	7	2	1	0	2	9	6	8	7	16	5	25	10	12	6	10	7	2	1	2	8	38	5	3	13	10	8	2	9	5	7	9	5	18	10	5	14	12	0	5	7	6	8	5	36	3
hsa_miR_141_5p	3	0	0	0	0	0	0	0	0	0	0	1	2	5	4	2	12	5	3	2	11	0	0	0	0	0	0	0	0	0	0	0	0	0	0	0	0	0	0	0	0	0	0	0	0	0	0	0	0
hsa_miR_142_3p	8	19723	13474	15505	14110	15226	15189	11482	25483	30333	15448	19302	12477	22060	17408	20568	24129	27011	21231	17996	17385	18603	14125	16870	36357	22858	18127	24660	17424	24078	12208	11021	20923	26566	29971	27194	18148	39562	15488	18605	27496	11066	27972	21531	9749	23676	13720	17304	17606
hsa_miR_142_5p	8	11738	6038	7422	6918	7987	4496	6104	8684	9875	6497	9207	4691	13955	11582	8139	12716	19281	10583	11338	7916	8039	6269	10061	12842	10050	9061	10833	5863	12365	7510	8072	10240	13647	14055	9059	12354	23604	9667	11989	12932	5667	14015	11407	7404	16131	7380	8034	8377
hsa_miR_143_3p	8	150	10	2	4	3	4	4	24	11	6	1	163	12	562	19	7	35	4	13	5	8	47	7	194	11	28	14	4	103	9	1	7	20	61	5	83	23	4	13	26	59	6	2	4	3	51	37	9
hsa_miR_144_3p	8	3232	596	763	559	522	468	589	1409	1212	820	971	1224	910	1174	1301	1005	1793	1216	1173	620	725	686	760	7142	872	1176	1262	508	2032	537	673	1022	1123	3307	1393	1102	3529	1045	1334	1221	623	1943	1376	523	1740	1161	1735	1197
hsa_miR_144_5p	8	4442	2406	2572	3439	2552	3085	2722	3097	2090	1606	2498	5023	7744	8753	3827	5476	6953	2276	3946	4276	3746	3305	3538	9312	2271	2985	2719	4829	3282	3059	4538	4124	4425	2487	3374	5703	3556	3699	4485	4578	4879	4584	4590	3084	3128	1750	6362	3325
hsa_miR_145_5p	3	0	0	0	0	0	0	0	0	0	0	0	39	1	68	0	1	3	0	0	0	1	0	0	12	0	1	1	0	1	1	0	0	0	0	0	0	0	0	0	0	0	0	0	0	0	0	0	0
hsa_miR_146a_5p	8	2490	410	470	440	450	513	424	565	625	553	377	3588	964	6513	484	926	1788	404	425	824	379	539	740	2589	979	333	811	899	654	698	625	621	1350	1348	817	4604	449	271	553	1069	1381	731	559	589	677	914	2575	253
hsa_miR_146b_5p	8	65	92	34	64	77	96	54	158	107	58	45	75	120	125	80	79	112	73	117	98	70	47	118	105	173	35	147	180	47	119	123	70	201	158	103	192	63	77	73	123	154	89	51	133	95	62	38	60
hsa_miR_147b	2	0	0	0	0	0	0	0	0	0	0	0	0	0	0	0	0	0	0	0	0	0	0	0	0	0	0	0	0	0	0	0	0	0	0	0	0	0	0	0	0	0	0	0	0	0	0	0	0
hsa_miR_148a_3p	8	2748	2639	2821	2465	2073	1926	1631	4455	2816	2237	2395	2243	3352	3013	3943	3372	4396	2673	4522	2473	2550	2780	1808	5788	2683	2963	4080	2957	3935	2549	3685	2613	3747	5302	3195	3325	3630	3887	3458	3228	1860	3759	4155	3594	3659	2657	3290	2974
hsa_miR_148a_5p	2	0	0	0	0	0	0	0	0	0	0	0	0	0	0	0	0	0	0	0	0	0	0	0	0	0	0	0	0	0	0	0	0	0	0	0	0	0	0	0	0	0	0	0	0	0	0	0	0
hsa_miR_148b_3p	8	463	749	548	700	500	482	469	786	472	760	401	551	1034	847	889	893	1098	536	998	767	789	802	480	915	739	572	950	639	878	575	816	780	870	840	802	833	872	786	814	1216	597	879	821	1109	902	780	633	833
hsa_miR_148b_5p	8	25	13	21	28	14	10	10	20	16	14	11	21	32	35	20	28	35	19	24	24	20	18	9	24	29	16	25	26	23	22	24	19	30	21	25	25	32	21	27	31	23	20	28	26	38	19	18	18
hsa_miR_149_5p	2	0	0	0	0	0	0	0	0	0	0	2	2	2	3	2	2	18	6	1	0	0	0	0	0	0	0	0	0	0	0	0	0	0	0	0	0	0	0	0	0	0	0	0	0	0	0	0	0
hsa_miR_150_3p	8	0	7	4	5	3	3	2	9	11	1	4	3	11	4	3	11	4	2	3	7	4	3	4	3	4	6	7	10	4	8	6	0	10	4	5	8	5	4	5	8	0	4	12	12	10	1	3	2
hsa_miR_150_5p	8	432	701	513	626	601	498	477	1394	1616	446	837	468	1216	729	854	867	567	875	1241	797	604	414	923	489	1024	700	612	1208	703	1053	1339	701	1279	456	819	850	681	778	1160	859	349	692	1095	1240	1027	328	383	663
hsa_miR_151a_3p	8	196	671	402	547	347	421	295	252	291	354	302	276	801	538	206	691	590	315	750	675	603	305	283	257	383	235	546	288	257	261	905	452	468	271	576	496	438	620	599	739	326	484	518	988	640	381	354	369
hsa_miR_151b_151a_5p	8	17	58	21	34	19	22	22	35	26	22	40	22	62	34	27	62	41	42	79	49	61	20	14	22	27	27	45	24	18	14	81	35	35	18	70	29	55	73	67	58	11	53	56	69	54	22	23	52
hsa_miR_152_3p	8	43	8	18	16	11	13	16	11	10	15	9	61	18	77	16	17	34	12	18	9	14	11	9	90	12	15	14	15	25	16	7	17	18	71	14	44	10	13	22	14	42	14	23	13	24	15	67	11
hsa_miR_1539	1	0	0	0	0	0	0	0	0	0	0	0	0	0	0	0	0	0	0	0	0	0	0	0	0	0	0	0	0	0	0	0	0	0	0	0	0	0	0	0	0	0	0	0	0	0	0	0	0
hsa_miR_154_5p	6	0	0	0	0	0	0	0	0	0	0	1	4	6	9	4	3	6	0	6	10	6	12	3	3	6	5	14	8	7	2	0	0	0	0	0	0	0	0	0	0	2	1	5	6	8	7	2	2
hsa_miR_155_5p	8	177	487	633	799	502	399	601	647	577	695	434	437	1419	744	575	981	645	351	536	689	386	309	620	426	756	271	1274	838	255	581	711	701	1042	421	590	612	497	443	1128	652	573	721	835	743	944	312	371	313
hsa_miR_15a_3p	5	0	0	0	0	0	0	0	0	0	0	6	1	7	3	2	7	12	6	5	6	0	0	0	0	0	0	0	0	0	0	6	10	4	11	4	7	4	3	1	7	2	7	6	3	6	8	5	3
hsa_miR_15a_5p	8	4096	2802	2912	3021	2698	2634	2101	3977	2420	2718	2708	3557	4538	5399	3135	4542	6079	3261	3813	3779	2619	2720	2741	5445	2966	3073	4209	2963	3623	2554	3577	3408	4236	4088	4102	5222	4994	3096	4444	4653	3442	4020	4129	3052	4419	3555	4692	3552
hsa_miR_15b_3p	8	415	209	203	296	242	333	173	497	217	217	296	414	479	693	436	375	443	305	284	339	261	245	237	756	269	311	321	403	354	213	309	285	353	520	509	663	355	163	326	392	238	348	322	194	247	171	459	341
hsa_miR_15b_5p	8	7282	10347	9026	10621	9599	9122	8541	12212	9260	10473	9253	5878	16826	11551	10576	15443	16641	10404	11416	13522	9091	9054	10581	6298	11706	9329	14408	10678	10911	8284	11617	11194	16297	9907	12371	12710	13657	9893	12572	15738	8943	11628	12721	11070	13087	7968	8572	10340
hsa_miR_16_1_3p	8	18	5	6	11	11	6	13	14	21	22	5	15	13	23	11	22	37	10	15	21	12	9	21	29	16	8	17	10	16	11	18	17	27	31	17	22	25	22	21	22	11	13	9	13	14	9	22	15
hsa_miR_16_2_3p	8	443	392	508	511	389	372	417	428	441	498	392	333	778	708	346	681	786	393	465	548	395	397	467	492	486	478	596	499	439	404	610	668	755	598	753	843	761	441	753	845	650	615	651	608	705	415	548	476
hsa_miR_16_5p	8	410207	432081	476137	496625	442380	431231	450982	480072	451787	511265	415216	350922	812986	688645	378327	751077	756618	399703	531404	667221	436161	433890	458119	481052	528281	473599	662790	485207	464875	434222	605613	618275	681326	514868	646037	685428	667184	503584	657217	793202	668911	626066	647638	602355	699160	478126	560724	488320
hsa_miR_17_3p	8	205	126	116	111	139	86	103	208	92	131	100	131	156	206	175	170	333	146	191	166	124	131	141	342	207	119	264	141	183	136	152	141	293	290	163	321	288	130	207	208	194	197	168	225	188	218	181	224
hsa_miR_17_5p	8	756	1001	1096	1104	1126	997	1187	1460	1252	1172	1382	620	1885	984	1329	2064	1928	1352	1537	1723	1085	795	1440	1635	1292	1171	1624	1364	1097	1056	1581	1871	2042	1298	1975	1243	2002	1702	1878	2336	1124	1548	1986	1151	1743	978	1143	1298
hsa_miR_181a_2_3p	8	37	39	39	35	77	31	41	34	25	34	53	24	72	51	34	69	106	48	58	53	49	59	43	34	34	49	58	42	71	29	67	62	52	39	45	101	92	42	55	50	35	56	61	62	48	21	39	30
hsa_miR_181a_3p	8	11	10	9	9	7	11	5	11	7	3	5	5	8	12	12	12	5	4	11	6	4	15	11	12	4	6	15	12	9	7	11	8	13	7	8	10	9	9	6	10	4	8	6	10	10	9	12	7
hsa_miR_181a_5p	8	392	910	664	1163	925	593	679	786	586	810	713	407	1415	712	548	1194	1640	717	925	1108	789	1073	911	403	1138	757	1221	783	854	855	1221	876	1639	510	612	1047	1010	741	1231	944	621	953	830	1246	803	478	460	562
hsa_miR_181b_5p	8	58	80	73	114	97	66	92	88	76	95	129	63	156	118	44	99	211	106	129	100	84	91	82	99	118	87	150	98	89	76	128	72	142	63	72	140	137	89	109	97	81	76	88	112	99	62	52	54
hsa_miR_181c_3p	2	0	0	0	0	0	0	0	0	0	0	0	0	0	0	0	0	0	0	0	0	0	0	0	0	0	0	0	0	0	0	0	0	0	0	0	0	0	0	0	0	0	0	0	0	0	0	0	0
hsa_miR_181c_5p	2	0	0	0	0	0	0	0	0	0	0	0	0	0	0	0	0	0	0	0	0	0	0	0	0	0	0	0	0	0	0	0	0	0	0	0	0	0	0	0	0	0	0	0	0	0	0	0	0
hsa_miR_181d_5p	4	0	0	0	0	0	0	0	0	0	0	0	0	0	0	0	0	0	0	0	0	3	1	5	5	7	4	10	4	2	4	0	0	0	0	0	0	0	0	0	0	4	6	10	2	5	0	3	3
hsa_miR_182_5p	8	41	302	99	42	79	66	56	114	138	56	87	35	105	84	96	162	150	70	508	131	304	76	113	47	131	70	78	111	73	118	551	147	197	119	105	140	122	459	100	171	153	148	173	563	104	83	88	89
hsa_miR_1827	1	0	0	0	0	0	0	0	0	0	0	0	0	0	0	0	0	0	0	0	0	0	0	0	0	0	0	0	0	0	0	0	0	0	0	0	0	0	0	0	0	0	0	0	0	0	0	0	0
hsa_miR_183_5p	8	28	161	63	46	58	50	36	59	98	41	40	20	86	44	67	90	86	40	264	96	157	39	87	25	108	47	74	72	56	80	317	79	134	67	70	77	68	274	61	98	107	81	106	335	45	52	40	52
hsa_miR_185_3p	8	4	8	3	15	4	5	9	5	12	9	3	7	23	11	2	9	13	9	18	14	11	13	9	10	13	4	12	7	5	5	6	10	15	10	11	8	5	16	13	10	7	10	4	9	15	2	4	5
hsa_miR_185_5p	8	1428	2023	1294	2189	1346	1583	1521	1720	1445	1788	1300	929	3861	3216	1576	2101	4132	1510	2412	2188	1795	1743	1843	744	2237	1850	2812	1790	1864	1707	2677	1627	3024	2646	2312	3209	2149	2160	3818	2711	2238	1779	1730	2300	3132	2179	1170	1452
hsa_miR_186_3p	1	0	0	0	0	0	0	0	0	0	0	0	0	0	0	0	0	0	0	0	0	0	0	0	0	0	0	0	0	0	0	0	0	0	0	0	0	0	0	0	0	0	0	0	0	0	0	0	0
hsa_miR_186_5p	8	890	1441	956	1413	1050	1178	1388	1116	739	1543	843	891	2206	1553	894	2289	1792	936	1238	1827	1489	1196	1376	1693	1496	850	2529	1465	1059	773	1286	1643	2014	999	1576	1446	1379	1096	1395	2503	877	1763	1200	1058	1719	783	1059	873
hsa_miR_187_3p	8	165	448	226	539	324	279	623	372	344	590	255	248	866	420	295	407	407	242	476	393	322	327	502	282	499	289	911	411	226	360	484	338	702	245	367	309	305	365	661	541	279	292	332	567	610	228	119	262
hsa_miR_187_5p	7	2	2	3	3	4	0	3	2	20	4	6	6	11	4	8	1	3	6	6	2	0	0	0	0	0	0	0	0	0	0	14	2	10	2	2	7	6	6	13	7	3	2	7	13	6	1	1	6
hsa_miR_188_5p	3	0	0	0	0	0	0	0	0	0	0	0	0	0	0	0	0	0	0	0	0	2	2	1	18	2	0	3	2	2	1	0	0	0	0	0	0	0	0	0	0	0	0	0	0	0	0	0	0
hsa_miR_18a_3p	8	22	55	45	68	42	38	68	81	47	78	45	31	85	59	39	71	91	44	86	87	63	42	81	47	77	37	98	63	27	52	85	48	118	43	76	51	67	57	102	86	59	57	59	79	78	41	36	57
hsa_miR_18a_5p	8	83	133	126	141	142	124	220	202	200	183	185	89	236	116	204	292	263	203	242	199	162	93	284	220	165	163	285	173	139	160	194	248	345	267	313	123	346	240	258	335	122	240	277	184	258	163	125	178
hsa_miR_18b_5p	2	0	0	0	0	0	0	0	0	0	0	0	0	0	0	0	0	0	0	0	0	0	0	0	0	0	0	0	0	0	0	0	0	0	0	0	0	0	0	0	0	0	0	0	0	0	0	0	0
hsa_miR_190a_3p	1	0	0	0	0	0	0	0	0	0	0	0	0	0	0	0	0	0	0	0	0	0	0	0	0	0	0	0	0	0	0	0	0	0	0	0	0	0	0	0	0	0	0	0	0	0	0	0	0
hsa_miR_190a_5p	8	1357	1010	993	473	206	349	702	971	299	919	295	586	756	719	880	1499	373	308	1662	444	1215	909	225	2380	232	1291	1455	701	1325	188	1200	1310	377	1143	680	332	560	1418	802	697	182	1653	1518	1149	906	369	1140	455
hsa_miR_190b	8	67	53	39	95	56	67	50	51	60	45	44	165	183	202	57	79	102	49	58	125	42	40	64	92	73	58	67	66	49	40	56	55	117	86	142	104	69	63	146	153	84	62	66	58	185	127	69	109
hsa_miR_191_3p	8	13	29	16	25	19	21	9	20	20	15	13	19	30	29	19	33	28	17	45	27	27	16	16	12	14	17	18	17	17	22	33	20	24	27	19	30	25	24	24	30	25	26	18	33	18	24	21	19
hsa_miR_191_5p	8	9983	18927	14817	17591	14617	11054	15072	19274	18445	13240	14064	5684	26757	15615	13830	21300	25952	14108	22376	22714	17021	12119	17402	5611	22028	16064	18341	15196	17944	16173	25445	16443	25840	13256	15691	21265	18758	18099	22289	23886	17879	16005	19269	25337	19471	12910	10092	15391
hsa_miR_192_3p	1	0	0	0	0	0	0	0	0	0	0	0	0	0	0	0	0	0	0	0	0	0	0	0	0	0	0	0	0	0	0	0	0	0	0	0	0	0	0	0	0	0	0	0	0	0	0	0	0
hsa_miR_192_5p	8	358	145	332	445	305	99	149	350	169	154	208	700	681	1052	307	459	609	252	159	123	116	112	156	1391	256	91	239	316	108	156	156	402	284	2870	119	677	354	108	523	170	583	462	427	162	574	138	871	93
hsa_miR_193a_5p	4	0	0	0	0	0	0	0	0	0	0	0	13	1	12	0	1	1	0	2	2	0	0	4	20	0	0	0	0	0	0	0	0	2	12	0	1	0	1	0	0	3	0	0	1	0	1	12	0
hsa_miR_194_5p	8	141	68	141	185	97	44	70	142	69	96	108	410	335	623	146	290	319	127	88	60	54	51	76	465	94	51	121	145	55	55	76	211	144	842	71	341	198	71	327	79	284	269	231	84	347	47	467	37
hsa_miR_195_5p	8	158	119	152	149	137	121	127	161	110	161	119	128	205	266	119	183	214	126	138	133	186	187	230	190	226	176	257	240	183	203	139	150	257	162	185	250	191	132	211	234	270	233	272	249	296	184	259	226
hsa_miR_196a_5p	8	321	695	1102	271	772	110	758	447	864	770	734	204	563	322	349	1775	1045	653	988	191	668	460	902	912	1047	459	1325	584	430	799	1111	1296	1465	443	173	954	977	810	350	185	1217	1302	1495	1027	369	119	1001	109
hsa_miR_196b_5p	8	84	53	158	74	89	103	112	77	82	104	106	62	143	108	65	213	177	125	94	154	53	90	39	203	52	134	201	49	130	48	94	130	76	68	155	131	169	83	127	171	67	158	196	99	138	125	133	140
hsa_miR_1972	1	0	0	0	0	0	0	0	0	0	0	0	0	0	0	0	0	0	0	0	0	0	0	0	0	0	0	0	0	0	0	0	0	0	0	0	0	0	0	0	0	0	0	0	0	0	0	0	0
hsa_miR_197_3p	8	65	141	73	124	131	94	116	156	176	84	156	56	226	129	132	133	206	146	212	156	147	72	103	61	111	135	115	120	117	98	241	122	138	105	145	158	217	189	287	189	78	99	156	225	154	82	50	131
hsa_miR_197_5p	1	0	0	0	0	0	0	0	0	0	0	0	0	0	0	0	0	0	0	0	0	0	0	0	0	0	0	0	0	0	0	0	0	0	0	0	0	0	0	0	0	0	0	0	0	0	0	0	0
hsa_miR_1976	8	12	24	29	34	16	7	17	20	11	21	20	12	46	21	18	28	25	10	27	15	20	22	17	17	26	24	17	35	18	9	17	34	35	17	17	20	25	26	31	17	20	24	29	27	26	6	14	19
hsa_miR_199a_3p	8	951	96	113	139	74	98	58	235	338	95	89	804	195	1379	296	116	362	109	130	128	91	343	380	1171	436	270	192	156	430	460	133	80	729	692	129	626	189	107	201	179	445	146	198	186	182	388	456	258
hsa_miR_199a_5p	6	0	0	0	0	0	0	0	0	0	0	1	4	2	12	0	1	3	2	1	0	2	3	8	21	7	4	1	1	2	6	2	4	12	13	0	2	2	3	1	2	0	0	0	0	0	0	0	0
hsa_miR_199b_3p	8	96	6	11	9	7	14	3	33	29	5	8	113	15	178	29	12	41	12	19	15	8	30	39	140	36	22	13	19	40	40	14	8	41	52	17	38	15	10	20	6	36	20	25	9	8	24	37	16
hsa_miR_199b_5p	8	34	14	7	11	4	17	3	25	3	11	9	13	7	28	33	12	31	8	12	10	4	19	12	39	14	10	26	16	37	7	2	8	19	64	12	23	16	7	17	21	12	30	13	14	14	45	40	26
hsa_miR_19a_3p	8	1221	414	379	304	368	300	353	698	313	511	309	801	448	1234	492	583	1084	403	420	384	353	351	276	2984	444	285	892	418	334	302	316	430	599	1249	532	1304	741	356	390	765	575	659	419	302	493	535	1345	378
hsa_miR_19b_1_5p	2	0	0	0	0	0	0	0	0	0	0	0	0	0	0	0	0	0	0	0	0	0	0	0	0	0	0	0	0	0	0	0	0	0	0	0	0	0	0	0	0	0	0	0	0	0	0	0	0
hsa_miR_19b_3p	8	4958	2888	2465	2214	2301	2274	2154	3528	1642	3571	1746	3500	3084	6519	2771	4261	6019	2310	2377	2688	2496	2630	2392	9815	3062	1809	5367	2974	2391	1708	2033	3069	3913	5344	3253	6951	3628	1911	2337	4938	3220	4213	2634	1824	2785	2727	6910	2123
hsa_miR_200a_3p	1	0	0	0	0	0	0	0	0	0	0	0	0	0	0	0	0	0	0	0	0	0	0	0	0	0	0	0	0	0	0	0	0	0	0	0	0	0	0	0	0	0	0	0	0	0	0	0	0
hsa_miR_200b_3p	8	4	1	11	3	6	9	2	7	4	3	5	3	9	6	6	24	14	11	1	5	0	11	4	5	7	4	1	14	15	5	3	11	8	4	7	8	1	6	11	12	7	10	22	2	8	5	6	6
hsa_miR_200c_3p	8	5	8	9	7	10	9	8	13	10	15	11	12	22	11	24	10	14	11	19	16	5	6	13	15	8	9	19	17	10	14	12	15	20	11	10	9	12	10	17	14	8	13	15	21	20	9	4	13
hsa_miR_202_3p	4	0	0	0	0	0	0	0	0	0	0	0	0	0	0	0	0	0	0	0	0	0	0	0	0	0	0	0	0	0	0	7	4	1	12	1	4	6	3	4	5	0	0	0	0	0	0	0	0
hsa_miR_204_5p	6	1	0	0	3	1	10	2	1	1	1	0	2	2	2	2	1	0	0	0	21	0	0	0	0	0	0	0	0	0	0	0	0	1	3	16	0	0	1	7	16	0	0	1	2	4	15	0	11
hsa_miR_206	8	12	0	5	0	14	9	1	26	13	7	10	39	16	22	16	8	18	4	1	14	2	6	23	8	9	13	6	3	33	11	3	5	1	25	10	29	16	2	16	25	14	17	5	3	12	15	35	12
hsa_miR_20a_3p	8	9	10	7	9	13	19	8	20	13	9	9	8	14	19	12	19	22	13	13	13	9	11	7	19	14	9	13	17	9	5	11	17	20	28	26	28	10	14	16	23	11	20	14	11	10	8	7	19
hsa_miR_20a_5p	8	4537	4779	4259	3944	4647	3950	4993	6432	4901	5124	4975	3862	7029	5400	5480	8635	9070	5447	6958	6275	4877	2846	7263	9205	5817	4003	8376	5848	3909	5099	6757	6826	9764	5866	6639	6667	7904	5713	7108	7848	6019	6015	7426	5020	6713	4349	5186	4758
hsa_miR_20b_5p	8	30	25	19	22	24	38	22	20	17	16	16	23	42	40	15	40	42	9	33	59	24	10	19	22	11	16	24	25	17	12	34	21	29	29	49	30	17	18	31	73	34	15	22	20	27	35	22	39
hsa_miR_210_3p	8	246	484	235	357	290	401	531	292	204	718	223	242	624	380	219	515	524	268	422	632	408	278	472	512	438	189	943	410	199	226	496	397	632	324	493	453	395	398	408	854	381	317	260	609	430	275	291	294
hsa_miR_21_3p	8	8	1	2	5	4	3	4	11	5	5	4	23	8	28	4	6	13	5	6	7	3	8	1	43	7	6	12	5	5	2	3	6	5	15	7	31	11	6	8	8	8	5	7	11	4	12	24	10
hsa_miR_215_5p	8	17	4	8	11	4	4	3	6	5	6	9	37	23	34	11	14	21	5	3	3	4	10	4	140	7	6	10	11	6	9	7	7	3	72	1	17	6	10	6	6	19	10	9	1	8	3	47	1
hsa_miR_21_5p	8	6755	3334	3205	3593	3845	3092	2284	5837	3213	3746	3414	8939	4425	10031	4418	4606	8387	4091	4157	3827	3205	4032	2701	13297	3632	4133	6030	3612	4752	3340	3867	3639	5075	6227	4540	9538	5669	3389	4692	5118	3886	4783	4335	3519	4740	4518	6725	4027
hsa_miR_219a_5p	7	5	9	4	4	5	8	5	15	5	6	1	6	6	6	5	6	10	5	6	4	7	4	5	8	11	3	19	2	6	5	3	2	5	22	14	13	7	3	5	14	0	0	0	0	0	0	0	0
hsa_miR_219b_5p	1	0	0	0	0	0	0	0	0	0	0	0	0	0	0	0	0	0	0	0	0	0	0	0	0	0	0	0	0	0	0	0	0	0	0	0	0	0	0	0	0	0	0	0	0	0	0	0	0
hsa_miR_221_3p	8	3315	3891	4268	5240	3811	4756	4963	4423	3911	5624	3398	3737	8985	6698	3583	7679	7546	3583	4412	7650	3729	4296	5498	4845	5736	3917	8820	5235	4320	4023	5115	5500	8256	3321	6463	6451	5140	3559	6192	8482	4377	4864	5238	4076	5556	3811	4208	3864
hsa_miR_221_5p	8	22	31	29	31	26	32	23	28	17	35	26	25	43	57	28	60	40	20	24	54	29	37	30	51	35	28	57	36	40	29	38	35	55	38	40	54	35	18	31	52	24	26	30	31	33	41	33	36
hsa_miR_222_3p	8	192	224	217	294	206	226	569	333	380	515	207	227	520	403	232	429	451	190	325	399	233	186	328	345	342	255	715	268	254	243	376	345	554	273	356	405	293	240	432	433	274	285	348	294	359	244	285	329
hsa_miR_223_3p	8	9907	8647	5684	5586	5841	5223	4364	20572	7847	7087	6746	4450	7378	8736	18703	7509	11987	8936	7834	5201	5308	9911	6194	13438	6763	10052	14748	10199	17354	6406	7154	5375	11018	16876	6296	11339	12514	5689	9783	6531	4292	12411	13744	8007	8364	6047	9907	10057
hsa_miR_223_5p	8	75	45	45	33	21	35	36	84	43	56	41	123	45	168	81	63	115	40	50	39	31	57	39	176	55	52	95	65	71	38	57	33	61	100	50	202	67	25	66	45	69	73	66	53	43	62	169	61
hsa_miR_22_3p	8	285	339	244	399	264	343	206	460	343	263	278	490	591	763	348	571	657	318	348	482	271	189	495	602	484	193	402	398	253	321	455	430	805	555	471	653	452	314	613	609	521	402	438	326	506	355	587	339
hsa_miR_22_5p	8	13	16	9	8	8	8	18	19	16	13	16	11	23	26	8	15	27	9	13	22	15	9	25	19	25	7	16	19	12	18	28	14	32	15	21	28	22	17	32	25	12	11	15	10	17	11	16	8
hsa_miR_2277_3p	8	3	4	7	16	4	7	2	16	2	8	12	4	4	5	11	6	8	10	10	6	16	8	3	1	9	7	3	6	11	3	14	15	1	11	8	3	14	9	11	13	1	11	15	11	2	6	8	9
hsa_miR_23a_3p	8	770	518	413	416	437	353	481	839	465	569	502	928	607	1716	774	717	1345	656	703	504	485	483	508	825	592	526	950	652	773	492	734	575	895	801	501	1603	797	530	686	640	490	699	765	640	558	506	1022	589
hsa_miR_23b_3p	8	392	384	311	371	319	227	323	406	316	333	356	842	592	1385	351	569	873	421	623	483	366	314	311	638	414	416	543	345	452	314	615	440	485	415	364	1144	549	442	491	456	390	400	517	470	456	377	738	348
hsa_miR_23b_5p	1	0	0	0	0	0	0	0	0	0	0	0	0	0	0	0	0	0	0	0	0	0	0	0	0	0	0	0	0	0	0	0	0	0	0	0	0	0	0	0	0	0	0	0	0	0	0	0	0
hsa_miR_23c	1	0	0	0	0	0	0	0	0	0	0	0	0	0	0	0	0	0	0	0	0	0	0	0	0	0	0	0	0	0	0	0	0	0	0	0	0	0	0	0	0	0	0	0	0	0	0	0	0
hsa_miR_24_3p	8	894	570	379	502	415	387	456	675	491	534	475	757	730	1378	642	631	1178	616	535	435	421	417	550	830	537	534	809	498	700	467	698	538	745	883	541	1423	633	506	747	584	560	574	810	573	603	470	912	504
hsa_miR_25_3p	8	10091	15920	12513	15386	13711	10571	14032	19206	15599	11695	13736	11791	27832	22581	15485	21583	23166	13657	21749	21930	16257	11009	14002	15582	17838	14689	18454	16004	14347	15365	28212	16238	22639	14107	16482	23188	19869	18204	24842	22115	20650	16140	20411	30119	22370	14565	14895	17969
hsa_miR_25_5p	8	6	20	23	25	22	14	19	29	23	28	19	6	49	18	25	26	30	26	31	26	35	25	21	3	26	19	33	27	21	15	38	19	46	23	36	24	28	33	35	35	12	28	29	43	26	30	9	19
hsa_miR_26a_2_3p	1	0	0	0	0	0	0	0	0	0	0	0	0	0	0	0	0	0	0	0	0	0	0	0	0	0	0	0	0	0	0	0	0	0	0	0	0	0	0	0	0	0	0	0	0	0	0	0	0
hsa_miR_26a_5p	8	6195	7771	6543	5397	5114	4267	5290	7282	6101	6321	4824	4132	8022	8901	5646	10953	10459	5335	9103	6358	6562	6030	6870	6016	7687	5773	9683	6614	6998	6051	10060	7829	11369	6893	6020	10878	7013	6877	6480	6843	7330	9111	9345	8867	6252	4484	7773	4817
hsa_miR_26b_3p	8	4	5	3	10	3	3	6	11	7	3	7	7	10	13	7	6	12	9	4	5	2	10	4	11	7	8	4	9	11	5	11	5	14	6	5	6	11	7	15	8	6	8	5	10	17	3	12	5
hsa_miR_26b_5p	8	8517	3506	2784	8739	2869	4086	2804	7273	5215	2909	3362	14303	14596	18812	6226	5054	5521	3942	4136	4602	3249	4820	4803	6443	4714	5695	4584	5753	6831	3536	4699	3620	7787	7883	5657	8066	4319	2965	11914	4680	5212	3998	4925	4091	9838	3092	5432	4641
hsa_miR_27a_3p	8	443	182	187	184	183	134	157	280	191	298	222	526	216	780	322	312	685	328	258	177	163	223	224	805	283	222	521	180	409	194	320	234	287	536	212	781	424	261	253	252	221	348	332	317	298	342	576	273
hsa_miR_27a_5p	8	11	4	4	3	2	1	4	8	7	3	7	6	11	19	5	4	9	5	9	8	3	6	2	14	7	0	3	2	9	1	6	10	7	12	6	29	5	3	9	14	5	9	12	6	9	8	16	0
hsa_miR_27b_3p	8	775	748	642	729	654	453	717	785	656	685	682	619	1172	1004	689	1089	1251	733	1411	840	777	675	621	1258	737	869	1245	684	875	681	1598	858	978	1147	736	844	967	1170	1181	993	774	1025	1118	1406	1338	605	821	643
hsa_miR_28_3p	8	35	47	42	34	49	55	50	75	42	45	35	56	78	96	53	78	74	53	49	74	42	58	48	52	64	61	73	69	60	45	68	58	71	63	59	99	72	35	76	62	69	83	75	104	63	30	66	39
hsa_miR_28_5p	7	3	7	6	4	5	2	5	11	3	4	4	4	12	3	4	8	9	6	6	5	2	6	2	4	4	7	11	8	5	4	5	6	7	3	10	7	4	3	6	7	0	0	0	0	0	0	0	0
hsa_miR_296_3p	8	10	15	26	25	28	21	20	22	40	17	25	8	56	19	19	24	37	32	29	24	15	18	14	5	27	16	25	21	25	19	34	18	39	23	31	34	33	25	25	37	21	20	29	34	32	12	8	24
hsa_miR_296_5p	8	12	24	32	39	41	27	31	82	135	34	85	14	50	17	57	53	90	90	113	44	48	15	63	18	75	86	43	31	56	105	97	53	81	25	33	43	108	89	89	63	18	37	118	103	44	36	23	72
hsa_miR_299_3p	1	0	0	0	0	0	0	0	0	0	0	0	0	0	0	0	0	0	0	0	0	0	0	0	0	0	0	0	0	0	0	0	0	0	0	0	0	0	0	0	0	0	0	0	0	0	0	0	0
hsa_miR_299_5p	8	21	13	5	16	10	16	10	14	5	14	12	13	19	23	11	12	24	9	18	19	15	23	8	13	5	26	20	14	9	6	18	17	20	9	16	8	5	10	28	31	5	11	15	25	25	9	15	8
hsa_miR_29a_3p	8	1360	471	557	679	483	410	247	661	260	472	253	2246	966	2700	499	790	936	412	413	533	302	707	358	4003	610	386	805	766	595	440	482	557	714	1153	564	2085	515	271	620	629	589	760	513	645	888	501	1869	327
hsa_miR_29b_2_5p	6	0	0	0	0	0	0	0	0	0	0	3	5	15	1	6	16	9	12	9	6	5	2	4	6	10	7	8	3	2	7	12	15	12	7	5	4	6	10	12	12	11	8	13	7	7	5	5	7
hsa_miR_29b_3p	8	930	373	553	448	354	326	231	508	345	405	315	820	577	1029	419	753	776	379	385	403	324	454	325	1446	522	409	622	394	651	386	410	543	657	751	546	1038	615	370	452	572	591	764	689	401	634	479	1002	389
hsa_miR_29c_3p	8	4600	2894	3806	2591	2524	2315	1093	3343	1876	2215	1799	4488	3255	5883	2656	4717	5483	2457	2800	3046	2350	3271	2322	8437	3681	2481	3498	2553	3609	2568	2725	3575	4043	4489	3729	5462	4555	2405	2949	4075	3644	5090	3773	3148	3762	3742	6708	2917
hsa_miR_29c_5p	8	63	105	84	72	73	85	59	79	84	71	54	38	113	55	64	185	112	89	112	135	105	77	128	63	132	75	118	99	95	84	87	136	166	95	122	90	136	99	76	144	49	159	141	78	94	76	61	78
hsa_miR_301a_3p	8	52	43	27	41	21	35	45	43	45	70	25	27	61	65	40	64	73	31	66	48	33	21	52	141	41	28	110	25	41	45	40	35	59	75	63	57	84	49	67	54	43	77	65	52	73	42	45	60
hsa_miR_301a_5p	1	0	0	0	0	0	0	0	0	0	0	0	0	0	0	0	0	0	0	0	0	0	0	0	0	0	0	0	0	0	0	0	0	0	0	0	0	0	0	0	0	0	0	0	0	0	0	0	0
hsa_miR_3064_5p	2	0	0	0	0	0	0	0	0	0	0	0	0	0	0	0	0	0	0	0	0	0	0	0	0	0	0	0	0	0	0	0	0	0	0	0	0	0	0	0	0	0	0	0	0	0	0	0	0
hsa_miR_30a_3p	8	65	16	31	50	14	20	10	21	15	18	28	57	108	103	38	83	51	27	33	56	23	80	34	77	40	80	86	45	81	43	21	31	35	28	19	37	26	12	64	36	20	37	37	21	57	19	46	32
hsa_miR_30a_5p	8	1488	74	178	641	29	155	14	45	74	24	19	963	992	1645	27	416	166	19	87	221	76	1243	102	920	108	817	49	44	928	65	88	299	153	297	189	380	43	54	704	280	287	339	230	101	815	170	673	119
hsa_miR_30b_3p	1	0	0	0	0	0	0	0	0	0	0	0	0	0	0	0	0	0	0	0	0	0	0	0	0	0	0	0	0	0	0	0	0	0	0	0	0	0	0	0	0	0	0	0	0	0	0	0	0
hsa_miR_30b_5p	8	282	305	178	232	227	247	246	314	178	359	188	231	372	453	287	443	544	228	271	338	266	285	276	486	323	218	489	326	280	125	219	292	403	449	359	396	349	235	340	625	239	393	315	181	345	238	399	223
hsa_miR_30c_1_3p	8	2	13	20	6	12	6	9	17	12	7	5	4	21	9	10	18	15	12	15	9	10	6	9	5	14	7	12	6	7	3	11	13	12	20	17	17	14	14	8	16	12	14	16	11	19	7	8	14
hsa_miR_30c_2_3p	1	0	0	0	0	0	0	0	0	0	0	0	0	0	0	0	0	0	0	0	0	0	0	0	0	0	0	0	0	0	0	0	0	0	0	0	0	0	0	0	0	0	0	0	0	0	0	0	0
hsa_miR_30c_5p	8	1144	1438	1015	1289	991	1196	1291	1539	980	1432	1065	941	2055	1872	1553	2382	2416	1253	1433	1723	1303	1064	1467	1733	1494	1083	2084	1500	1343	868	1442	1910	1932	1703	1728	1978	1708	1170	1826	2703	1213	1991	1795	1224	1737	1043	1673	1324
hsa_miR_30d_3p	8	10	7	8	15	12	2	4	9	4	15	4	3	20	8	8	11	19	12	20	12	6	8	10	6	10	12	10	7	12	3	9	11	23	14	12	8	14	7	11	20	10	12	14	18	11	9	6	10
hsa_miR_30d_5p	8	4145	4788	3743	5115	3546	3861	5046	4969	3646	4640	2699	3346	8856	7393	4102	6700	7103	3137	4861	7027	4635	4167	5367	4063	6071	4043	7470	5386	4373	4241	5809	5025	7572	5130	5257	7021	4335	4045	6035	7047	6167	4568	4668	6212	5743	4139	4093	3918
hsa_miR_30e_3p	8	188	162	191	250	206	279	234	256	211	254	164	193	395	316	203	350	381	200	236	333	157	240	220	420	253	183	456	217	208	187	236	291	428	275	351	314	331	186	367	484	270	357	350	249	424	212	266	260
hsa_miR_30e_5p	8	4991	3479	3366	3361	3571	3276	2984	4411	2937	3927	3232	4381	5577	7052	3646	5995	7967	3766	4028	4775	3530	2919	3756	8744	3934	2844	6435	4156	3421	2801	3642	4687	5583	6122	5443	7129	6364	3433	4516	6732	4423	5402	4323	3977	5752	3896	5635	3821
hsa_miR_3120_3p	1	0	0	0	0	0	0	0	0	0	0	0	0	0	0	0	0	0	0	0	0	0	0	0	0	0	0	0	0	0	0	0	0	0	0	0	0	0	0	0	0	0	0	0	0	0	0	0	0
hsa_miR_3122	8	5	28	8	17	14	7	12	13	8	8	12	6	21	12	13	16	21	11	30	12	26	14	16	16	20	13	35	16	11	13	36	16	21	12	8	17	20	29	19	17	21	13	10	35	9	6	7	6
hsa_miR_3128	8	41	3	1	1	0	0	2	9	5	2	0	23	1	19	9	0	7	1	0	3	2	1	1	43	0	6	1	4	9	5	1	1	2	39	2	25	9	3	2	2	4	7	3	2	1	22	18	8
hsa_miR_3135b	8	6	7	3	10	9	1	5	11	17	3	14	4	20	14	13	2	26	16	15	3	5	3	9	3	12	8	13	11	7	13	15	4	30	20	6	20	17	8	15	3	10	4	12	8	4	4	3	7
hsa_miR_3140_3p	4	0	0	0	0	0	0	0	0	0	0	0	0	0	0	0	0	0	0	0	0	0	0	0	0	0	0	0	0	0	0	14	4	5	4	4	6	7	4	11	3	0	0	0	0	0	0	0	0
hsa_miR_3141	8	3	2	4	6	4	0	1	27	15	1	22	2	1	0	19	0	3	24	34	6	14	4	1	1	4	31	1	1	20	6	30	20	2	6	4	4	22	30	28	10	3	7	51	20	4	8	6	26
hsa_miR_3146	7	5	5	3	6	7	11	3	8	6	2	1	4	14	3	5	13	7	8	8	11	0	0	0	0	0	0	0	0	0	0	10	4	4	7	7	15	8	6	16	19	7	1	1	15	8	7	2	6
hsa_miR_3149	4	0	0	0	0	0	0	0	0	0	0	0	0	0	0	0	0	0	0	0	0	0	0	0	0	0	0	0	0	0	0	1	2	6	15	2	1	0	1	1	4	1	3	4	0	1	11	2	5
hsa_miR_3158_3p	4	0	0	0	0	0	0	0	0	0	0	0	0	0	0	0	0	0	0	0	0	0	0	0	0	0	0	0	0	0	0	4	3	13	3	2	5	5	9	9	5	4	2	5	8	10	4	3	1
hsa_miR_31_5p	7	3	4	4	18	1	4	1	3	6	4	6	18	20	17	1	11	11	5	3	4	11	4	1	4	8	1	2	8	0	7	11	3	9	2	6	14	5	10	18	7	2	5	7	8	12	0	1	1
hsa_miR_3160_3p	1	0	0	0	0	0	0	0	0	0	0	0	0	0	0	0	0	0	0	0	0	0	0	0	0	0	0	0	0	0	0	0	0	0	0	0	0	0	0	0	0	0	0	0	0	0	0	0	0
hsa_miR_3173_3p	1	0	0	0	0	0	0	0	0	0	0	0	0	0	0	0	0	0	0	0	0	0	0	0	0	0	0	0	0	0	0	0	0	0	0	0	0	0	0	0	0	0	0	0	0	0	0	0	0
hsa_miR_3173_5p	8	2	5	3	3	4	1	4	7	12	3	3	3	16	6	5	4	9	7	12	6	3	2	4	7	5	10	0	5	7	8	20	3	5	3	6	7	8	8	11	6	3	5	11	20	16	5	5	9
hsa_miR_3174	1	0	0	0	0	0	0	0	0	0	0	0	0	0	0	0	0	0	0	0	0	0	0	0	0	0	0	0	0	0	0	0	0	0	0	0	0	0	0	0	0	0	0	0	0	0	0	0	0
hsa_miR_3199	2	0	0	0	0	0	0	0	0	0	0	0	0	0	0	0	0	0	0	0	0	0	0	0	0	0	0	0	0	0	0	0	0	0	0	0	0	0	0	0	0	0	0	0	0	0	0	0	0
hsa_miR_3200_3p	8	45	67	47	72	56	42	70	29	53	72	34	47	142	78	24	77	83	40	98	71	70	67	77	72	83	85	131	27	67	60	118	60	110	18	88	51	72	78	95	83	70	63	81	128	102	59	38	71
hsa_miR_3200_5p	1	0	0	0	0	0	0	0	0	0	0	0	0	0	0	0	0	0	0	0	0	0	0	0	0	0	0	0	0	0	0	0	0	0	0	0	0	0	0	0	0	0	0	0	0	0	0	0	0
hsa_miR_3202	7	0	0	0	0	0	0	0	0	0	0	1	2	6	3	8	7	6	2	11	5	7	3	7	2	11	1	4	8	1	5	11	4	12	6	6	2	2	4	11	7	5	2	7	10	3	6	5	6
hsa_miR_320a	8	554	1619	1207	1465	1264	1314	1295	1701	1766	1264	1421	359	2576	1301	1223	1981	2679	1378	2076	2093	1464	1176	1725	251	1957	1381	1779	1488	1476	1265	2328	1507	2787	1341	1814	1787	1783	1863	2309	2207	1035	1230	1864	1850	1673	1385	706	1450
hsa_miR_320b	8	21	51	50	68	53	70	81	61	83	54	57	23	162	62	67	82	126	77	118	105	60	58	100	19	89	79	99	78	81	71	105	61	126	66	80	76	86	76	130	100	55	51	93	92	90	71	36	51
hsa_miR_320c	8	11	26	18	37	27	30	20	23	36	18	27	19	62	34	23	34	51	22	46	44	34	25	34	18	38	24	27	22	29	34	57	21	40	17	36	52	33	38	37	42	26	22	29	46	23	22	27	25
hsa_miR_320d	8	3	6	7	7	6	7	11	8	8	7	10	4	12	5	7	12	16	6	15	14	4	7	6	2	9	5	6	15	9	5	9	5	17	11	8	4	11	10	7	12	9	7	11	8	7	7	7	6
hsa_miR_320e	1	0	0	0	0	0	0	0	0	0	0	0	0	0	0	0	0	0	0	0	0	0	0	0	0	0	0	0	0	0	0	0	0	0	0	0	0	0	0	0	0	0	0	0	0	0	0	0	0
hsa_miR_323a_3p	1	0	0	0	0	0	0	0	0	0	0	0	0	0	0	0	0	0	0	0	0	0	0	0	0	0	0	0	0	0	0	0	0	0	0	0	0	0	0	0	0	0	0	0	0	0	0	0	0
hsa_miR_323b_3p	6	0	0	0	0	0	0	0	0	0	0	0	0	10	6	5	3	3	2	4	5	0	0	0	0	0	0	0	0	0	0	6	3	6	1	3	1	6	3	10	6	0	4	3	4	14	2	0	7
hsa_miR_32_3p	4	0	0	0	0	0	0	0	0	0	0	5	4	5	5	8	2	5	2	11	2	0	0	0	0	0	0	0	0	0	0	3	4	8	5	9	4	11	7	5	8	0	0	0	0	0	0	0	0
hsa_miR_324_3p	8	13	10	14	14	14	16	13	14	10	23	6	5	30	13	3	31	21	7	11	20	25	13	17	6	27	12	26	19	11	10	15	15	26	18	23	12	14	10	29	26	12	11	11	11	21	10	15	8
hsa_miR_324_5p	8	37	69	69	84	69	94	64	62	53	82	60	45	143	65	34	130	117	77	79	114	68	67	81	40	101	51	114	81	66	62	94	109	104	78	120	81	85	69	102	166	63	80	89	70	113	47	48	71
hsa_miR_32_5p	8	1363	313	526	261	333	434	189	706	609	390	451	451	404	569	633	643	882	526	590	473	312	701	328	1714	488	677	579	290	1288	348	307	529	649	1161	909	702	1394	488	453	770	331	944	707	311	575	1010	842	826
hsa_miR_326	8	2	2	8	8	5	2	13	18	7	9	5	3	14	4	6	6	9	3	3	8	11	8	10	5	9	6	18	12	12	3	4	10	10	4	10	9	7	2	16	13	2	11	9	1	3	5	4	6
hsa_miR_328_3p	3	0	0	0	0	0	0	0	0	0	0	4	2	10	4	6	3	4	6	12	1	0	0	0	0	0	0	0	0	0	0	0	0	0	0	0	0	0	0	0	0	0	0	0	0	0	0	0	0
hsa_miR_329_3p	1	0	0	0	0	0	0	0	0	0	0	0	0	0	0	0	0	0	0	0	0	0	0	0	0	0	0	0	0	0	0	0	0	0	0	0	0	0	0	0	0	0	0	0	0	0	0	0	0
hsa_miR_330_3p	1	0	0	0	0	0	0	0	0	0	0	0	0	0	0	0	0	0	0	0	0	0	0	0	0	0	0	0	0	0	0	0	0	0	0	0	0	0	0	0	0	0	0	0	0	0	0	0	0
hsa_miR_330_5p	1	0	0	0	0	0	0	0	0	0	0	0	0	0	0	0	0	0	0	0	0	0	0	0	0	0	0	0	0	0	0	0	0	0	0	0	0	0	0	0	0	0	0	0	0	0	0	0	0
hsa_miR_331_3p	8	29	45	23	75	63	28	95	146	130	46	129	30	110	62	120	69	107	143	240	115	170	17	73	53	73	135	43	49	83	99	237	119	57	46	68	65	167	206	213	115	66	29	140	228	87	65	31	120
hsa_miR_331_5p	8	14	58	15	36	28	18	45	36	26	30	24	18	56	31	29	41	49	26	50	37	30	27	41	30	33	17	50	37	25	27	42	27	56	36	33	35	32	31	43	44	33	31	30	50	40	16	19	33
hsa_miR_335_3p	7	6	2	5	1	2	8	1	7	10	0	3	1	2	2	1	1	13	3	8	7	6	8	4	1	5	15	1	2	7	4	3	4	13	4	6	2	7	2	4	7	7	8	3	3	1	10	3	5
hsa_miR_335_5p	8	60	10	6	3	12	7	2	16	18	5	8	19	11	64	13	5	60	15	15	7	3	16	16	12	13	18	2	10	23	20	10	10	35	42	15	51	16	8	5	13	47	9	9	9	8	13	17	11
hsa_miR_337_3p	1	0	0	0	0	0	0	0	0	0	0	0	0	0	0	0	0	0	0	0	0	0	0	0	0	0	0	0	0	0	0	0	0	0	0	0	0	0	0	0	0	0	0	0	0	0	0	0	0
hsa_miR_337_5p	8	14	4	3	10	1	4	7	8	2	4	3	11	3	11	2	4	1	5	6	4	4	6	5	12	4	4	6	5	8	2	5	3	6	7	8	13	4	4	18	12	1	8	3	7	7	4	2	6
hsa_miR_338_3p	8	16	26	8	12	18	13	9	57	14	18	21	25	16	32	101	9	42	33	30	13	6	58	22	50	18	56	54	21	62	20	28	8	33	35	22	48	72	21	42	18	4	34	37	40	29	41	22	74
hsa_miR_339_3p	8	194	506	177	452	240	232	436	347	251	315	200	274	685	501	279	310	508	243	464	380	480	273	380	253	456	229	492	360	295	258	464	276	541	320	280	370	294	403	509	397	408	227	215	518	411	219	191	208
hsa_miR_339_5p	8	1190	3982	1313	3268	1626	1806	2243	2162	1654	2546	1126	1521	5166	2971	1909	2361	2594	1354	3372	3084	3953	2187	2539	1472	3576	1798	3236	2765	2099	1735	3448	1796	3624	1897	2305	2126	1956	2994	2896	3995	2085	1728	1321	4255	3444	1728	1030	1765
hsa_miR_33a_5p	8	37	34	13	20	26	16	14	45	17	28	14	29	15	17	24	21	39	36	28	28	21	26	27	72	44	19	56	14	24	16	28	12	51	63	45	69	67	20	37	63	13	22	11	36	63	63	16	36
hsa_miR_33b_5p	3	0	0	0	0	0	0	0	0	0	0	0	0	0	0	0	0	0	0	0	0	0	0	0	0	0	0	0	0	0	0	0	0	0	0	0	0	0	0	0	0	0	0	0	0	0	0	0	0
hsa_miR_340_3p	8	5	10	11	12	3	15	4	18	20	7	11	10	14	7	18	12	11	16	13	16	6	8	9	5	9	15	7	10	11	11	14	7	15	16	9	9	16	10	12	13	6	7	8	11	13	4	5	7
hsa_miR_340_5p	8	859	296	390	336	251	248	105	627	303	222	253	419	409	717	555	384	486	321	356	319	208	454	261	591	386	444	321	368	581	320	276	266	417	763	434	607	446	347	495	467	445	483	427	297	478	468	526	417
hsa_miR_342_3p	8	201	111	102	102	135	102	105	191	285	84	98	129	237	182	112	156	177	90	160	164	109	101	184	165	284	91	126	255	97	290	238	131	304	135	141	244	75	118	148	200	166	107	113	277	182	53	69	34
hsa_miR_342_5p	3	0	0	0	0	0	0	0	0	0	0	0	0	0	0	0	0	0	0	0	0	0	0	0	0	0	0	0	0	0	0	0	0	0	0	0	0	0	0	0	0	0	0	0	0	0	0	0	0
hsa_miR_34a_5p	8	115	43	16	68	35	56	56	142	47	81	49	115	107	135	169	37	116	78	46	59	41	82	78	214	61	67	278	97	237	60	44	21	103	177	74	72	140	30	140	81	64	37	40	39	132	172	25	153
hsa_miR_3613_3p	7	0	0	0	0	0	0	0	0	0	0	7	9	11	24	7	12	18	7	13	13	3	7	6	5	5	7	10	8	6	4	6	7	10	14	10	22	8	2	14	16	12	6	12	5	9	4	8	2
hsa_miR_3613_5p	8	351	344	278	358	137	482	121	369	453	205	193	235	416	341	191	421	235	180	187	292	152	392	174	445	404	240	489	251	376	119	80	246	446	408	241	272	430	341	340	334	222	387	233	113	370	210	193	168
hsa_miR_361_3p	8	129	220	167	205	183	167	211	275	250	201	189	158	406	252	228	352	355	237	351	357	236	123	240	266	278	173	216	225	202	272	436	307	340	197	268	378	266	305	287	373	209	215	364	425	263	240	219	289
hsa_miR_361_5p	8	739	1597	1358	1412	1330	1436	1388	1894	1212	1296	1233	716	2408	1905	1511	2341	2614	1289	2203	2587	1629	945	1246	732	1509	1155	2077	1707	1164	1265	2571	1719	2083	1314	1985	2257	1612	1716	1901	2495	1273	1644	1900	2103	1702	1443	1087	1638
hsa_miR_362_3p	2	0	0	0	0	0	0	0	0	0	0	0	0	0	0	0	0	0	0	0	0	1	2	2	12	0	2	2	0	0	0	0	0	0	0	0	0	0	0	0	0	0	0	0	0	0	0	0	0
hsa_miR_362_5p	8	21	40	15	47	36	31	34	36	18	47	19	34	68	43	36	42	40	23	20	40	25	15	37	27	28	19	48	35	27	20	28	38	39	32	43	22	32	24	51	54	18	37	19	30	51	27	15	27
hsa_miR_363_3p	8	31	28	22	39	20	60	10	26	21	23	26	23	61	47	25	52	49	21	43	80	32	35	24	14	26	29	42	30	32	28	41	31	49	23	82	39	35	28	43	106	32	29	25	34	35	71	25	96
hsa_miR_3656	2	0	0	0	0	0	0	0	0	0	0	0	0	0	0	0	0	0	0	0	0	0	0	0	0	0	0	0	0	0	0	0	0	0	0	0	0	0	0	0	0	0	0	0	0	0	0	0	0
hsa_miR_3657	8	0	12	15	11	18	3	4	16	12	6	24	2	13	9	10	18	22	21	22	6	12	0	18	10	14	0	9	12	0	13	11	8	24	13	6	18	24	27	8	13	8	9	11	10	12	4	12	6
hsa_miR_365a_3p	1	0	0	0	0	0	0	0	0	0	0	0	0	0	0	0	0	0	0	0	0	0	0	0	0	0	0	0	0	0	0	1	0	0	10	0	0	0	0	0	0	0	0	0	0	0	0	0	0
hsa_miR_3688_5p	8	7	5	5	12	6	12	0	8	6	16	4	9	6	11	9	9	10	6	8	5	10	6	3	14	5	11	11	13	10	10	7	8	13	16	10	8	10	10	9	12	4	14	8	6	9	5	3	6
hsa_miR_3692_5p	1	0	0	0	0	0	0	0	0	0	0	0	0	0	0	0	0	0	0	0	0	0	0	0	0	0	0	0	0	0	0	0	0	0	0	0	0	0	0	0	0	0	0	0	0	0	0	0	0
hsa_miR_369_3p	8	24	16	7	17	7	10	15	17	7	24	17	12	15	26	14	14	8	7	14	15	6	36	5	25	8	21	29	15	37	10	15	6	16	7	20	12	10	8	15	24	4	12	5	10	25	5	7	7
hsa_miR_369_5p	8	12	4	12	11	8	8	10	18	6	11	8	8	25	18	8	11	7	7	12	17	10	23	6	9	12	21	23	14	17	7	20	7	11	11	18	9	8	7	22	13	5	17	14	16	20	5	3	10
hsa_miR_370_3p	8	10	14	11	34	12	16	17	18	15	37	18	6	63	12	21	26	16	22	19	30	8	40	13	6	24	46	46	30	33	20	14	13	32	10	36	10	17	18	51	30	6	13	16	18	39	7	8	11
hsa_miR_371a_5p	6	0	0	0	0	0	0	0	0	0	0	1	6	6	14	2	2	5	2	2	2	0	0	0	0	0	0	0	0	0	0	0	1	12	2	1	4	0	0	2	1	9	2	1	0	1	1	1	0
hsa_miR_372_3p	8	6	1	3	10	5	3	1	4	13	6	6	10	20	28	6	8	7	4	6	2	0	5	17	6	26	4	7	6	8	14	1	7	27	2	4	13	7	0	11	2	19	5	4	0	20	2	2	0
hsa_miR_373_3p	4	0	0	0	0	0	0	0	0	0	0	0	0	0	0	0	0	0	0	0	0	0	0	0	0	0	0	0	0	0	0	0	0	10	2	1	2	3	1	2	0	0	0	0	0	0	0	0	0
hsa_miR_374a_3p	8	32	18	22	6	15	15	10	26	17	14	19	14	16	20	26	18	27	31	21	13	17	14	12	61	15	16	23	9	37	10	14	18	18	46	20	27	46	19	16	18	2	30	14	19	25	39	19	31
hsa_miR_374a_5p	8	1031	653	549	570	586	575	401	1016	516	636	612	528	676	986	965	790	1611	799	873	813	572	741	468	1391	572	783	1024	533	1026	515	707	637	909	1054	996	1241	1356	759	1022	1085	480	978	867	617	1006	846	776	894
hsa_miR_374b_3p	4	0	0	0	0	0	0	0	0	0	0	0	0	0	0	0	0	0	0	0	0	3	4	2	11	3	5	8	0	6	6	0	0	0	0	0	0	0	0	0	0	2	6	7	7	3	5	6	7
hsa_miR_374b_5p	8	148	136	110	154	118	166	142	233	120	129	151	90	195	254	195	228	325	150	196	221	143	144	116	215	152	167	225	200	179	116	187	178	211	205	207	268	204	134	178	244	103	221	163	153	137	135	162	135
hsa_miR_375	4	0	0	0	0	0	0	0	0	0	0	0	0	0	0	0	0	0	0	0	0	2	0	0	29	0	1	2	1	0	0	2	1	2	16	0	7	0	0	2	1	2	1	1	1	0	0	14	1
hsa_miR_376a_3p	8	19	10	8	11	6	5	4	6	4	11	5	7	13	27	13	7	11	3	10	7	6	7	4	10	5	15	9	7	15	2	9	6	5	12	9	13	4	9	22	18	4	9	10	4	13	3	7	7
hsa_miR_376b_3p	5	18	1	0	1	1	0	0	0	1	2	0	12	1	15	0	1	2	1	1	4	1	6	0	32	1	1	6	2	4	1	0	0	0	0	0	0	0	0	0	0	0	0	0	0	0	0	0	0
hsa_miR_376c_3p	8	55	16	15	13	8	9	8	19	13	29	8	17	16	51	13	12	29	12	19	16	6	24	9	23	10	30	33	16	22	5	16	10	16	29	29	31	9	15	35	37	13	17	20	17	27	11	10	14
hsa_miR_377_3p	1	0	0	0	0	0	0	0	0	0	0	0	0	0	0	0	0	0	0	0	0	0	0	0	0	0	0	0	0	0	0	0	0	0	0	0	0	0	0	0	0	0	0	0	0	0	0	0	0
hsa_miR_378a_3p	8	529	448	385	665	384	527	337	795	348	431	276	497	888	936	578	601	784	257	553	838	382	433	457	562	554	447	587	699	436	439	677	510	745	1043	636	719	435	480	962	907	791	450	511	614	645	656	451	630
hsa_miR_378a_5p	8	15	27	28	42	34	37	25	39	18	37	19	12	79	34	40	49	43	20	25	53	26	29	36	31	63	18	45	56	41	21	35	43	65	33	62	21	37	16	40	76	26	31	35	19	55	34	28	31
hsa_miR_378c	8	115	101	92	121	97	92	64	167	62	80	72	115	194	245	161	120	184	76	126	173	88	118	117	129	148	101	144	174	106	115	116	97	166	222	123	168	102	122	211	158	168	103	103	131	134	110	115	113
hsa_miR_378d	8	25	8	15	10	11	9	4	24	4	15	10	27	29	27	27	8	14	12	16	24	11	9	11	43	19	17	25	21	14	14	14	8	22	35	12	23	13	9	15	24	23	5	21	19	23	25	21	22
hsa_miR_378e	1	0	0	0	0	0	0	0	0	0	0	0	0	0	0	0	0	0	0	0	0	0	0	0	0	0	0	0	0	0	0	0	0	0	0	0	0	0	0	0	0	0	0	0	0	0	0	0	0
hsa_miR_378f	1	0	0	0	0	0	0	0	0	0	0	0	0	0	0	0	0	0	0	0	0	0	0	0	0	0	0	0	0	0	0	0	0	0	0	0	0	0	0	0	0	0	0	0	0	0	0	0	0
hsa_miR_378g	1	0	0	0	0	0	0	0	0	0	0	0	0	0	0	0	0	0	0	0	0	0	0	0	0	0	0	0	0	0	0	0	0	0	0	0	0	0	0	0	0	0	0	0	0	0	0	0	0
hsa_miR_378h	1	0	0	0	0	0	0	0	0	0	0	0	0	0	0	0	0	0	0	0	0	0	0	0	0	0	0	0	0	0	0	0	0	0	0	0	0	0	0	0	0	0	0	0	0	0	0	0	0
hsa_miR_379_3p	1	0	0	0	0	0	0	0	0	0	0	0	0	0	0	0	0	0	0	0	0	0	0	0	0	0	0	0	0	0	0	0	0	0	0	0	0	0	0	0	0	0	0	0	0	0	0	0	0
hsa_miR_379_5p	8	29	26	23	36	23	36	29	48	36	31	26	27	69	47	23	32	37	25	46	47	25	53	21	22	22	50	46	37	42	28	42	23	36	18	54	49	27	34	63	65	23	30	33	34	56	22	15	25
hsa_miR_381_3p	8	44	21	23	30	17	31	20	32	23	20	28	28	45	48	26	32	33	24	35	31	26	42	23	24	25	39	44	21	36	21	37	21	34	29	46	31	32	28	56	61	18	40	27	44	60	21	13	25
hsa_miR_382_3p	2	0	0	0	0	0	0	0	0	0	0	0	0	0	0	0	0	0	0	0	0	0	0	0	0	0	0	0	0	0	0	0	0	0	0	0	0	0	0	0	0	0	0	0	0	0	0	0	0
hsa_miR_382_5p	8	29	19	29	51	8	25	38	66	43	43	25	30	85	58	38	34	37	29	53	37	25	58	24	15	29	58	53	28	48	25	66	23	42	24	38	29	29	29	102	56	19	18	37	56	79	16	12	31
hsa_miR_3913_3p	1	0	0	0	0	0	0	0	0	0	0	0	0	0	0	0	0	0	0	0	0	0	0	0	0	0	0	0	0	0	0	0	0	0	0	0	0	0	0	0	0	0	0	0	0	0	0	0	0
hsa_miR_3922_5p	8	5	4	7	9	5	7	10	6	13	7	6	4	15	10	3	4	6	10	5	6	2	7	6	4	7	9	9	8	9	10	7	6	15	1	4	7	6	2	8	8	8	6	8	9	16	6	2	7
hsa_miR_409_3p	8	68	66	60	110	39	51	90	110	83	87	83	51	210	67	95	115	94	74	125	96	64	94	87	18	84	154	121	81	119	85	122	72	102	37	74	71	68	91	221	135	39	72	131	111	175	36	24	104
hsa_miR_409_5p	5	0	0	0	0	0	0	0	0	0	0	3	2	10	4	3	9	4	2	3	13	0	12	0	6	2	10	9	6	10	3	2	0	3	2	5	1	3	7	10	10	0	0	0	0	0	0	0	0
hsa_miR_411_5p	8	53	32	37	36	24	32	13	30	20	30	14	19	43	42	32	35	40	23	39	44	18	63	15	24	30	76	44	45	67	17	41	27	30	30	48	34	32	39	59	47	18	36	31	38	63	19	17	41
hsa_miR_412_5p	1	0	0	0	0	0	0	0	0	0	0	0	0	0	0	0	0	0	0	0	0	0	0	0	0	0	0	0	0	0	0	0	0	0	0	0	0	0	0	0	0	0	0	0	0	0	0	0	0
hsa_miR_421	8	104	149	93	140	94	138	142	149	142	135	93	87	230	211	109	204	199	103	203	237	126	140	167	113	199	148	252	125	153	135	221	140	251	143	149	163	116	167	203	240	177	147	151	195	185	152	118	148
hsa_miR_423_3p	8	452	1101	712	1233	843	711	1043	1135	1073	933	784	546	2017	916	730	1294	1524	704	1471	1491	1106	784	1203	570	1302	764	1318	1031	742	966	1616	915	1832	620	1000	869	1087	1140	1557	1357	826	793	1070	1479	1138	804	535	825
hsa_miR_423_5p	8	156	1009	982	1229	826	760	1051	1198	1796	896	904	98	2383	479	890	1247	1054	833	1347	1279	984	886	1101	79	1647	1026	1417	1135	1164	941	1427	953	1945	735	1181	617	961	1175	1597	1352	320	834	1440	1420	1426	633	172	855
hsa_miR_424_3p	6	2	5	1	4	2	1	11	5	1	15	1	6	11	7	5	1	6	3	3	1	2	0	4	6	3	1	10	1	0	2	0	0	0	0	0	0	0	0	0	0	0	0	0	0	0	0	0	0
hsa_miR_424_5p	8	60	9	7	17	4	8	21	18	8	44	7	80	13	106	17	3	44	12	16	6	17	1	4	310	12	12	62	3	32	13	6	4	9	43	11	40	36	19	36	6	20	18	7	7	39	20	41	18
hsa_miR_425_3p	8	188	322	224	283	232	250	249	211	207	230	180	177	426	318	177	409	329	188	260	441	287	244	287	204	340	197	390	256	208	246	293	273	455	221	333	302	254	230	293	488	325	341	271	336	319	236	204	286
hsa_miR_425_5p	8	3312	5522	4541	5451	4068	4439	3959	4530	3681	4430	3068	3159	8294	6611	3520	6968	7927	3385	5578	7303	5331	4407	5353	3940	6211	3990	6421	4999	4199	4510	5944	5419	8093	3634	5928	6442	4943	4372	6040	8213	4462	5061	4826	6264	5019	4212	4521	4653
hsa_miR_4281	3	11	0	0	0	0	0	0	0	0	1	0	0	0	0	0	0	0	0	0	0	0	0	0	26	0	0	0	0	1	0	0	1	1	25	1	7	1	0	0	1	0	0	0	0	0	0	0	0
hsa_miR_4286	8	4	16	4	9	11	16	11	24	11	11	14	2	18	5	23	16	18	19	19	16	13	8	8	8	24	18	17	12	17	6	29	21	6	20	16	10	25	22	10	26	7	9	15	20	12	17	9	15
hsa_miR_429	1	0	0	0	0	0	0	0	0	0	0	0	0	0	0	0	0	0	0	0	0	0	0	0	0	0	0	0	0	0	0	0	0	0	0	0	0	0	0	0	0	0	0	0	0	0	0	0	0
hsa_miR_4298	1	0	0	0	0	0	0	0	0	0	0	0	0	0	0	0	0	0	0	0	0	0	0	0	0	0	0	0	0	0	0	0	0	0	0	0	0	0	0	0	0	0	0	0	0	0	0	0	0
hsa_miR_4301	3	0	0	0	0	0	0	0	0	0	0	1	11	7	5	3	1	4	4	1	1	0	0	0	0	0	0	0	0	0	0	0	0	0	0	0	0	0	0	0	0	0	0	0	0	0	0	0	0
hsa_miR_4304	8	18	11	13	23	10	7	2	62	10	12	25	12	11	7	34	7	28	44	30	22	21	13	4	7	16	71	7	5	44	10	49	32	5	16	9	18	36	62	33	14	6	18	59	29	16	13	27	47
hsa_miR_4306	1	0	0	0	0	0	0	0	0	0	0	0	0	0	0	0	0	0	0	0	0	0	0	0	0	0	0	0	0	0	0	0	0	0	0	0	0	0	0	0	0	0	0	0	0	0	0	0	0
hsa_miR_431_3p	1	0	0	0	0	0	0	0	0	0	0	0	0	0	0	0	0	0	0	0	0	0	0	0	0	0	0	0	0	0	0	0	0	0	0	0	0	0	0	0	0	0	0	0	0	0	0	0	0
hsa_miR_431_5p	8	21	22	24	52	7	37	37	41	13	39	18	17	80	29	35	38	29	29	48	53	29	60	22	7	29	78	64	35	54	23	55	23	44	20	46	16	14	38	82	51	5	30	35	44	84	18	6	43
hsa_miR_4325	1	0	0	0	0	0	0	0	0	0	0	0	0	0	0	0	0	0	0	0	0	0	0	0	0	0	0	0	0	0	0	0	0	0	0	0	0	0	0	0	0	0	0	0	0	0	0	0	0
hsa_miR_432_5p	8	30	21	29	62	18	38	62	36	25	66	24	21	98	34	37	45	29	30	39	60	15	66	24	18	27	75	93	36	63	28	41	26	49	30	57	30	22	25	82	59	12	38	28	43	91	23	8	35
hsa_miR_4422	1	0	0	0	0	0	0	0	0	0	0	0	0	0	0	0	0	0	0	0	0	0	0	0	0	0	0	0	0	0	0	0	0	0	0	0	0	0	0	0	0	0	0	0	0	0	0	0	0
hsa_miR_4429	1	0	0	0	0	0	0	0	0	0	0	0	0	0	0	0	0	0	0	0	0	0	0	0	0	0	0	0	0	0	0	0	0	0	0	0	0	0	0	0	0	0	0	0	0	0	0	0	0
hsa_miR_4446_3p	8	1	12	10	11	6	3	17	8	16	19	3	2	25	4	13	29	5	6	19	10	7	11	16	1	29	9	37	13	8	15	30	12	25	8	10	2	4	4	15	13	7	11	14	26	12	3	0	2
hsa_miR_4454	8	130	183	224	227	137	142	122	263	137	128	131	116	333	256	205	306	280	139	221	213	150	135	127	119	220	175	210	180	203	163	213	236	231	211	169	227	200	195	244	299	168	231	282	241	244	157	208	194
hsa_miR_4469	5	0	0	0	0	0	0	0	0	0	0	2	1	5	9	5	3	15	5	5	0	0	0	0	0	0	0	0	0	0	0	0	0	0	0	0	0	0	0	0	0	4	2	11	9	7	1	0	5
hsa_miR_4483	2	0	0	0	0	0	0	0	0	0	0	0	0	0	0	0	0	0	0	0	0	0	0	0	0	0	0	0	0	0	0	1	0	0	9	0	15	0	0	2	0	0	0	0	0	0	0	0	0
hsa_miR_4485_3p	1	0	0	0	0	0	0	0	0	0	0	0	0	0	0	0	0	0	0	0	0	0	0	0	0	0	0	0	0	0	0	0	0	0	0	0	0	0	0	0	0	0	0	0	0	0	0	0	0
hsa_miR_449a	8	0	0	9	1	4	4	30	63	9	28	1	4	7	3	49	9	2	1	3	7	2	2	5	32	6	0	30	69	1	3	1	6	8	62	4	3	4	1	1	7	5	9	14	1	7	2	1	1
hsa_miR_4500	1	0	0	0	0	0	0	0	0	0	0	0	0	0	0	0	0	0	0	0	0	0	0	0	0	0	0	0	0	0	0	0	0	0	0	0	0	0	0	0	0	0	0	0	0	0	0	0	0
hsa_miR_4508	1	0	0	0	0	0	0	0	0	0	0	0	0	0	0	0	0	0	0	0	0	0	0	0	0	0	0	0	0	0	0	0	0	0	0	0	0	0	0	0	0	0	0	0	0	0	0	0	0
hsa_miR_450a_1_3p	1	0	0	0	0	0	0	0	0	0	0	0	0	0	0	0	0	0	0	0	0	0	0	0	0	0	0	0	0	0	0	0	0	0	0	0	0	0	0	0	0	0	0	0	0	0	0	0	0
hsa_miR_450b_5p	6	0	0	0	0	0	0	0	0	0	0	0	6	4	14	13	2	4	4	6	0	1	6	3	13	3	5	5	7	14	3	5	0	8	5	1	2	20	4	4	2	0	0	0	0	0	0	0	0
hsa_miR_4510	4	0	0	0	0	0	0	0	0	0	0	0	0	0	0	0	0	0	0	0	0	3	6	5	4	8	6	11	6	8	3	0	0	0	0	0	0	0	0	0	0	0	0	0	0	0	0	0	0
hsa_miR_4515	1	0	0	0	0	0	0	0	0	0	0	0	0	0	0	0	0	0	0	0	0	0	0	0	0	0	0	0	0	0	0	0	0	0	0	0	0	0	0	0	0	0	0	0	0	0	0	0	0
hsa_miR_451a	8	41201	36136	31085	43625	34093	30780	20005	43849	22082	36592	31166	31055	45459	59570	29976	42945	80725	34107	34579	39442	31071	41005	22123	50135	35001	32772	48996	29625	45055	20599	29291	34671	42325	44452	40538	60102	61181	27695	46658	53074	22899	50621	34055	24238	43073	32080	42319	33295
hsa_miR_451b	8	23	25	28	33	23	22	17	24	17	35	31	27	38	40	26	36	46	25	32	26	26	27	18	31	22	25	46	19	31	19	23	36	36	26	37	39	49	28	47	29	22	36	30	25	44	30	31	16
hsa_miR_454_3p	8	624	795	684	887	712	732	1048	949	914	1093	766	720	1624	1167	831	1282	1310	797	1207	1233	771	644	979	1417	1012	785	1747	887	851	881	1230	966	1561	855	1135	1036	1117	1012	1336	1272	1043	944	1273	983	1351	821	828	855
hsa_miR_454_5p	8	6	10	8	11	11	13	13	10	11	19	5	10	21	14	14	16	19	6	7	10	11	17	8	15	13	10	20	9	11	12	14	4	19	10	12	24	15	15	15	13	8	11	10	15	16	14	11	16
hsa_miR_455_5p	1	0	0	0	0	0	0	0	0	0	0	0	0	0	0	0	0	0	0	0	0	0	0	0	0	0	0	0	0	0	0	1	0	0	17	0	2	0	0	0	0	0	0	0	0	0	0	0	0
hsa_miR_4632_5p	1	0	0	0	0	0	0	0	0	0	0	0	0	0	0	0	0	0	0	0	0	0	0	0	0	0	0	0	0	0	0	0	0	0	0	0	0	0	0	0	0	0	0	0	0	0	0	0	0
hsa_miR_4649_3p	1	0	0	0	0	0	0	0	0	0	0	0	0	0	0	0	0	0	0	0	0	0	0	0	0	0	0	0	0	0	0	0	0	0	0	0	0	0	0	0	0	0	0	0	0	0	0	0	0
hsa_miR_4664_5p	1	0	0	0	0	0	0	0	0	0	0	0	0	0	0	0	0	0	0	0	0	0	0	0	0	0	0	0	0	0	0	0	0	0	0	0	0	0	0	0	0	0	0	0	0	0	0	0	0
hsa_miR_4670_5p	1	0	0	0	0	0	0	0	0	0	0	0	0	0	0	0	0	0	0	0	0	0	0	0	0	0	0	0	0	0	0	0	0	0	0	0	0	0	0	0	0	0	0	0	0	0	0	0	0
hsa_miR_4676_3p	1	0	0	0	0	0	0	0	0	0	0	0	0	0	0	0	0	0	0	0	0	0	0	0	0	0	0	0	0	0	0	0	0	0	0	0	0	0	0	0	0	0	0	0	0	0	0	0	0
hsa_miR_4677_3p	1	0	0	0	0	0	0	0	0	0	0	0	0	0	0	0	0	0	0	0	0	0	0	0	0	0	0	0	0	0	0	0	0	0	0	0	0	0	0	0	0	0	0	0	0	0	0	0	0
hsa_miR_4732_3p	8	10	24	15	32	12	12	43	33	29	30	25	14	53	31	29	29	42	18	41	26	36	22	31	25	38	32	49	18	26	41	59	29	50	24	26	27	33	50	55	24	15	15	41	47	34	14	17	32
hsa_miR_4738_3p	1	0	0	0	0	0	0	0	0	0	0	0	0	0	0	0	0	0	0	0	0	0	0	0	0	0	0	0	0	0	0	0	0	0	0	0	0	0	0	0	0	0	0	0	0	0	0	0	0
hsa_miR_4745_5p	8	8	7	15	19	12	5	7	8	5	5	10	7	28	14	9	25	22	5	11	11	13	12	8	5	19	3	8	6	7	7	7	11	15	38	8	12	21	8	18	12	18	16	11	9	23	9	7	4
hsa_miR_4749_3p	1	0	0	0	0	0	0	0	0	0	0	0	0	0	0	0	0	0	0	0	0	0	0	0	0	0	0	0	0	0	0	0	0	0	0	0	0	0	0	0	0	0	0	0	0	0	0	0	0
hsa_miR_4766_3p	8	16	21	7	6	10	22	11	12	5	14	5	14	23	13	7	21	20	7	23	28	22	30	18	11	19	18	19	15	18	17	23	17	21	17	16	22	14	16	19	56	18	17	18	32	19	29	15	34
hsa_miR_4766_5p	7	0	0	0	0	0	0	0	0	0	0	5	0	7	8	5	15	7	9	12	16	9	10	4	3	10	9	5	5	7	7	16	12	13	4	11	5	7	10	8	15	4	6	9	15	8	9	6	7
hsa_miR_4781_3p	1	0	0	0	0	0	0	0	0	0	0	0	0	0	0	0	0	0	0	0	0	0	0	0	0	0	0	0	0	0	0	0	0	0	0	0	0	0	0	0	0	0	0	0	0	0	0	0	0
hsa_miR_4784	8	23	9	9	25	14	4	5	65	35	10	70	15	11	17	55	7	41	91	70	9	38	2	2	18	21	96	2	2	41	22	113	41	5	28	6	28	73	109	67	24	9	13	83	62	14	30	34	56
hsa_miR_4785	1	0	0	0	0	0	0	0	0	0	0	0	0	0	0	0	0	0	0	0	0	0	0	0	0	0	0	0	0	0	0	0	0	0	0	0	0	0	0	0	0	0	0	0	0	0	0	0	0
hsa_miR_4787_5p	1	0	0	0	0	0	0	0	0	0	0	0	0	0	0	0	0	0	0	0	0	0	0	0	0	0	0	0	0	0	0	0	0	0	0	0	0	0	0	0	0	0	0	0	0	0	0	0	0
hsa_miR_4796_3p	2	0	0	0	0	0	0	0	0	0	0	0	0	0	0	0	0	0	0	0	0	0	0	0	0	0	0	0	0	0	0	0	0	0	0	0	0	0	0	0	0	0	0	0	0	0	0	0	0
hsa_miR_484	8	504	651	499	932	498	330	699	1027	878	498	756	614	1475	1029	671	742	993	826	1386	766	832	274	663	574	595	999	469	541	621	834	1181	752	777	404	569	842	830	1042	1622	709	474	395	1075	1081	788	556	605	802
hsa_miR_485_3p	6	1	4	4	3	1	4	5	16	5	6	0	0	0	0	0	0	0	0	0	0	3	5	7	2	7	15	6	3	8	9	14	2	4	1	5	4	1	4	25	7	2	3	10	18	10	1	2	6
hsa_miR_485_5p	2	0	0	0	0	0	0	0	0	0	0	0	0	0	0	0	0	0	0	0	0	0	0	0	0	0	0	0	0	0	0	0	0	0	0	0	0	0	0	0	0	0	0	0	0	0	0	0	0
hsa_miR_486_3p	8	1435	3306	2271	3051	2893	2260	2061	3775	3712	1892	2378	1304	4029	2322	2217	2578	3338	2168	3328	2748	3530	2555	2968	1485	3768	2396	3033	3489	2572	2982	4731	2345	4413	2304	3285	3435	3302	3314	3720	3545	10689	9015	10243	16724	9683	6569	6420	8200
hsa_miR_486_5p	8	37373	90222	61516	77620	74092	60027	56867	98010	97141	50512	73691	41214	131006	75197	69041	79606	103465	67910	104128	88489	82966	59915	71274	37791	86079	57645	74350	81721	57959	70219	125422	61153	111561	62761	83386	90810	80909	87448	98124	97820	70354	59909	65013	108764	64078	43420	42170	55936
hsa_miR_487b_3p	8	12	15	8	19	8	13	15	23	9	23	14	4	30	19	19	19	13	17	25	21	13	25	10	5	14	32	38	20	22	10	19	13	19	5	15	13	6	14	38	19	7	17	14	24	32	7	2	14
hsa_miR_491_5p	8	42	100	66	89	64	54	72	63	70	63	48	32	187	53	38	126	109	50	112	89	108	76	92	26	139	47	113	46	53	54	116	83	180	50	77	81	71	92	119	100	88	77	67	91	116	51	39	52
hsa_miR_493_3p	7	0	0	0	0	0	0	0	0	0	0	4	4	18	1	5	4	2	1	5	7	5	7	2	2	2	9	16	8	7	3	5	6	4	3	12	7	3	1	13	13	2	1	4	8	16	2	3	3
hsa_miR_493_5p	3	0	0	0	0	0	0	0	0	0	0	0	0	0	0	0	0	0	0	0	0	5	7	3	1	4	6	12	4	8	3	0	0	0	0	0	0	0	0	0	0	0	0	0	0	0	0	0	0
hsa_miR_494_3p	1	0	0	0	0	0	0	0	0	0	0	0	0	0	0	0	0	0	0	0	0	0	0	0	0	0	0	0	0	0	0	0	0	0	0	0	0	0	0	0	0	0	0	0	0	0	0	0	0
hsa_miR_497_5p	8	16	8	5	13	1	4	4	16	8	10	13	34	11	39	13	10	18	2	14	10	9	14	7	12	10	7	13	9	8	8	9	7	19	10	9	13	6	9	7	11	8	12	10	12	16	11	17	6
hsa_miR_4999_3p	1	0	0	0	0	0	0	0	0	0	0	0	0	0	0	0	0	0	0	0	0	0	0	0	0	0	0	0	0	0	0	0	0	0	0	0	0	0	0	0	0	0	0	0	0	0	0	0	0
hsa_miR_499a_3p	3	0	0	0	0	0	0	0	0	0	0	0	4	4	5	0	1	13	1	2	2	0	0	0	0	0	0	0	0	0	0	0	0	0	0	0	0	0	0	0	0	0	0	0	0	0	0	0	0
hsa_miR_499a_5p	8	54	59	37	98	63	50	81	102	114	116	87	59	132	115	105	52	130	101	84	82	57	38	123	201	107	61	182	66	55	116	64	41	172	108	97	83	159	81	160	127	96	63	43	44	200	68	34	63
hsa_miR_499b_3p	2	0	0	0	0	0	0	0	0	0	0	0	0	0	0	0	0	0	0	0	0	0	0	0	0	0	0	0	0	0	0	0	0	0	0	0	0	0	0	0	0	0	0	0	0	0	0	0	0
hsa_miR_5009_5p	1	0	0	0	0	0	0	0	0	0	0	0	0	0	0	0	0	0	0	0	0	0	0	0	0	0	0	0	0	0	0	0	0	0	0	0	0	0	0	0	0	0	0	0	0	0	0	0	0
hsa_miR_500a_3p	8	22	32	22	37	20	20	27	19	21	43	17	46	67	81	30	23	62	21	29	18	28	30	21	29	24	17	54	17	32	23	34	16	31	38	23	72	22	16	38	37	34	28	19	31	28	29	28	14
hsa_miR_500a_5p	8	5	4	1	12	6	4	11	6	5	11	4	6	14	16	6	6	9	15	7	17	4	4	8	7	2	2	11	8	4	6	5	7	9	9	7	6	7	4	9	12	3	1	7	4	7	8	3	11
hsa_miR_500b_5p	5	2	2	1	4	1	1	10	5	3	9	3	3	3	10	4	4	4	5	0	7	0	0	0	0	0	0	0	0	0	0	0	0	0	0	0	0	0	0	0	0	5	5	2	1	1	6	2	8
hsa_miR_501_3p	6	0	0	0	0	0	0	0	0	0	0	4	4	12	12	3	5	8	6	7	10	6	8	7	4	4	3	12	6	4	2	6	4	11	5	7	16	6	3	2	6	0	6	4	6	1	7	4	8
hsa_miR_501_5p	8	10	8	2	12	4	2	3	16	4	4	19	10	8	9	13	6	9	13	27	1	14	3	1	4	8	22	8	3	21	7	16	12	5	11	4	5	13	32	14	6	2	9	12	15	6	6	12	9
hsa_miR_502_3p	8	45	24	22	43	22	33	25	43	18	39	18	43	57	94	28	23	63	29	24	42	18	26	16	26	26	24	54	33	32	25	32	27	37	48	38	85	33	15	44	38	27	23	20	20	45	39	27	27
hsa_miR_502_5p	1	0	0	0	0	0	0	0	0	0	0	0	0	0	0	0	0	0	0	0	0	0	0	0	0	0	0	0	0	0	0	0	0	0	0	0	0	0	0	0	0	0	0	0	0	0	0	0	0
hsa_miR_503_3p	8	10	6	2	13	3	4	19	5	4	16	8	16	17	16	6	5	18	5	14	3	6	3	3	22	5	2	24	6	11	4	8	3	13	11	3	24	13	7	22	1	6	6	6	9	12	6	6	7
hsa_miR_503_5p	8	29	39	9	83	11	9	84	16	23	108	11	86	114	178	18	13	73	18	41	10	17	12	22	117	19	12	126	8	28	21	33	13	34	23	13	103	32	37	115	12	35	12	15	36	91	43	39	18
hsa_miR_505_3p	8	5	9	12	1	7	2	7	6	3	5	5	8	5	8	7	8	13	13	3	12	5	6	7	14	2	5	10	4	11	3	6	9	6	12	10	16	7	2	9	6	7	7	10	3	7	9	14	3
hsa_miR_505_5p	2	0	0	0	0	0	0	0	0	0	0	0	0	0	0	0	0	0	0	0	0	0	0	0	0	0	0	0	0	0	0	0	0	0	0	0	0	0	0	0	0	0	0	0	0	0	0	0	0
hsa_miR_5100	7	5	2	4	7	4	1	2	17	7	3	0	0	0	0	0	0	0	0	0	0	7	1	5	1	7	8	6	3	20	4	23	5	5	4	5	4	8	17	18	12	4	4	7	15	8	6	1	10
hsa_miR_510_3p	5	0	0	0	0	0	0	0	0	0	0	0	0	0	0	0	0	0	0	0	0	3	4	3	20	1	4	4	2	6	1	0	0	0	0	0	0	0	0	0	0	5	2	2	0	3	1	10	3
hsa_miR_532_3p	8	8	6	8	14	16	9	14	21	20	10	19	11	26	10	20	14	16	20	16	13	6	3	8	5	20	18	14	7	12	19	32	6	22	11	17	19	20	13	41	19	11	6	25	22	20	6	10	12
hsa_miR_532_5p	8	187	163	104	220	161	211	132	197	121	164	128	183	382	353	191	195	295	114	114	285	126	176	172	238	209	145	240	230	159	140	210	159	258	255	255	282	150	108	284	315	261	182	155	221	295	170	159	187
hsa_miR_542_3p	8	20	3	2	9	4	1	11	12	6	14	11	9	6	8	12	6	12	12	10	1	6	7	2	39	4	12	21	4	34	3	4	3	5	10	8	8	18	10	12	6	1	5	8	6	11	4	6	10
hsa_miR_542_5p	1	0	0	0	0	0	0	0	0	0	0	0	0	0	0	0	0	0	0	0	0	0	0	0	0	0	0	0	0	0	0	0	0	0	0	0	0	0	0	0	0	0	0	0	0	0	0	0	0
hsa_miR_543	1	0	0	0	0	0	0	0	0	0	0	0	0	0	0	0	0	0	0	0	0	0	0	0	0	0	0	0	0	0	0	0	0	0	0	0	0	0	0	0	0	0	0	0	0	0	0	0	0
hsa_miR_548_3p	4	0	0	0	0	0	0	0	0	0	0	5	0	2	4	11	1	14	7	1	1	0	0	0	0	0	0	0	0	0	0	0	0	0	0	0	0	0	0	0	0	0	0	0	0	0	0	0	0
hsa_miR_548a	3	0	0	0	0	0	0	0	0	0	0	0	0	0	0	0	0	0	0	0	0	0	0	0	0	0	0	0	0	0	0	10	2	2	5	6	3	1	2	2	5	0	0	0	0	0	0	0	0
hsa_miR_548ac	4	0	0	0	0	0	0	0	0	0	0	0	0	0	0	0	0	0	0	0	0	0	10	1	8	2	3	4	3	7	2	0	0	0	0	0	0	0	0	0	0	0	0	0	0	0	0	0	0
hsa_miR_548ad_5p	4	0	0	0	0	0	0	0	0	0	0	0	0	0	0	0	0	0	0	0	0	1	3	6	13	2	9	7	2	4	2	0	0	0	0	0	0	0	0	0	0	2	2	3	3	2	1	3	0
hsa_miR_548ae_3p	7	7	6	2	6	9	3	1	13	4	5	9	4	10	13	15	6	21	15	10	14	4	2	3	11	2	3	6	9	12	2	5	3	8	16	4	11	29	7	9	8	0	0	0	0	0	0	0	0
hsa_miR_548ae_5p	4	0	0	0	0	0	0	0	0	0	0	0	0	0	0	0	0	0	0	0	0	0	0	0	0	0	0	0	0	0	0	7	5	5	10	14	3	3	6	3	8	0	0	0	0	0	0	0	0
hsa_miR_548ah_3p	1	0	0	0	0	0	0	0	0	0	0	0	0	0	0	0	0	0	0	0	0	0	0	0	0	0	0	0	0	0	0	0	0	0	0	0	0	0	0	0	0	0	0	0	0	0	0	0	0
hsa_miR_548aj_3p	6	3	7	3	6	9	4	1	10	9	0	14	3	4	5	7	1	24	10	9	4	0	0	0	0	0	0	0	0	0	0	9	6	5	23	13	22	18	4	4	8	0	0	0	0	0	0	0	0
hsa_miR_548aj_5p	6	0	0	0	0	0	0	0	0	0	0	3	4	4	4	8	3	15	4	5	2	0	0	0	0	0	0	0	0	0	0	3	4	5	7	5	15	11	2	3	8	16	24	21	9	39	28	34	34
hsa_miR_548an	1	0	0	0	0	0	0	0	0	0	0	0	0	0	0	0	0	0	0	0	0	0	0	0	0	0	0	0	0	0	0	0	0	0	0	0	0	0	0	0	0	0	0	0	0	0	0	0	0
hsa_miR_548ao_5p	1	0	0	0	0	0	0	0	0	0	0	0	0	0	0	0	0	0	0	0	0	0	0	0	0	0	0	0	0	0	0	0	0	0	0	0	0	0	0	0	0	0	0	0	0	0	0	0	0
hsa_miR_548ap_3p_548t_3p_548aa	8	2	15	12	13	11	10	11	5	15	13	11	9	20	16	12	16	21	8	17	26	12	11	19	18	15	14	24	9	14	6	9	16	15	10	15	23	18	15	15	21	15	11	12	13	6	9	13	6
hsa_miR_548aq_3p	8	154	132	125	200	300	187	53	575	123	78	304	185	263	382	490	172	737	368	177	240	119	114	128	231	159	114	163	334	185	149	110	129	224	663	304	695	579	136	325	407	110	245	174	121	316	266	198	254
hsa_miR_548ar_5p	2	0	0	0	0	0	0	0	0	0	0	0	0	0	0	0	0	0	0	0	0	0	0	0	0	0	0	0	0	0	0	0	0	0	0	0	0	0	0	0	0	0	0	0	0	0	0	0	0
hsa_miR_548as_3p	1	0	0	0	0	0	0	0	0	0	0	0	0	0	0	0	0	0	0	0	0	0	0	0	0	0	0	0	0	0	0	0	0	0	0	0	0	0	0	0	0	0	0	0	0	0	0	0	0
hsa_miR_548at_3p	1	0	0	0	0	0	0	0	0	0	0	0	0	0	0	0	0	0	0	0	0	0	0	0	0	0	0	0	0	0	0	0	0	0	0	0	0	0	0	0	0	0	0	0	0	0	0	0	0
hsa_miR_548at_5p	8	2	17	4	11	6	8	11	19	10	12	9	6	20	6	11	11	24	15	21	20	8	6	12	20	12	8	8	5	7	7	8	8	26	18	20	14	21	13	20	17	7	10	8	10	23	12	4	6
hsa_miR_548au_5p_548c_5p_548o_5p_548am_5p	8	17	12	3	4	9	12	12	18	9	7	8	9	13	11	11	9	10	6	12	16	11	6	11	18	6	8	10	13	9	5	12	9	15	13	12	10	17	15	9	12	6	6	9	12	8	5	7	9
hsa_miR_548aw	1	0	0	0	0	0	0	0	0	0	0	0	0	0	0	0	0	0	0	0	0	0	0	0	0	0	0	0	0	0	0	0	0	0	0	0	0	0	0	0	0	0	0	0	0	0	0	0	0
hsa_miR_548az_3p	8	6	21	2	7	16	11	15	14	15	16	20	6	28	13	14	15	27	23	13	15	18	10	15	16	11	18	16	15	9	20	20	4	28	9	14	10	21	25	15	15	13	6	7	16	17	13	2	14
hsa_miR_548d_5p	1	0	0	0	0	0	0	0	0	0	0	0	0	0	0	0	0	0	0	0	0	0	0	0	0	0	0	0	0	0	0	0	0	0	0	0	0	0	0	0	0	0	0	0	0	0	0	0	0
hsa_miR_548g_5p	4	0	4	0	4	6	2	0	10	1	1	0	0	0	0	0	0	0	0	0	0	0	0	0	0	0	0	0	0	0	0	0	0	0	0	0	0	0	0	0	0	0	0	0	0	0	0	0	0
hsa_miR_548h_3p	2	0	0	0	0	0	0	0	0	0	0	0	0	0	0	0	0	0	0	0	0	0	0	0	0	0	0	0	0	0	0	0	0	0	0	0	0	0	0	0	0	0	0	0	0	0	0	0	0
hsa_miR_548h_5p	8	32	67	8	38	34	48	16	37	19	20	32	32	76	43	33	19	50	35	79	62	68	27	25	29	29	23	35	29	21	16	97	26	37	39	59	61	40	56	65	104	22	17	13	116	55	39	16	41
hsa_miR_548l	7	6	1	2	10	5	0	3	3	1	2	0	5	13	6	3	1	4	1	5	1	0	0	0	0	0	0	0	0	0	0	5	0	2	2	0	1	0	4	11	1	1	2	2	2	11	0	7	2
hsa_miR_548u	8	42	9	9	9	9	5	21	21	10	21	12	9	9	12	12	12	35	14	14	17	6	24	7	83	10	43	45	4	52	8	11	7	7	26	19	23	32	8	16	17	3	9	10	7	12	17	12	11
hsa_miR_548x_5p	2	0	0	0	0	0	0	0	0	0	0	0	0	0	0	0	0	0	0	0	0	0	0	0	0	0	0	0	0	0	0	0	0	0	0	0	0	0	0	0	0	0	0	0	0	0	0	0	0
hsa_miR_548z	1	0	0	0	0	0	0	0	0	0	0	0	0	0	0	0	0	0	0	0	0	0	0	0	0	0	0	0	0	0	0	0	0	0	0	0	0	0	0	0	0	0	0	0	0	0	0	0	0
hsa_miR_550a_5p	1	0	0	0	0	0	0	0	0	0	0	0	0	0	0	0	0	0	0	0	0	0	0	0	0	0	0	0	0	0	0	0	0	0	0	0	0	0	0	0	0	0	0	0	0	0	0	0	0
hsa_miR_550b_2_5p	1	0	0	0	0	0	0	0	0	0	0	0	0	0	0	0	0	0	0	0	0	0	0	0	0	0	0	0	0	0	0	0	0	0	0	0	0	0	0	0	0	0	0	0	0	0	0	0	0
hsa_miR_551a	1	0	0	0	0	0	0	0	0	0	0	0	0	0	0	0	0	0	0	0	0	0	0	0	0	0	0	0	0	0	0	0	0	0	0	0	0	0	0	0	0	0	0	0	0	0	0	0	0
hsa_miR_5690	8	14	13	12	6	10	11	14	18	11	9	12	6	6	17	15	13	24	20	11	15	15	9	5	24	11	7	15	14	5	8	13	17	12	22	9	18	24	11	14	15	19	10	21	16	10	6	15	16
hsa_miR_5697	1	0	0	0	0	0	0	0	0	0	0	0	0	0	0	0	0	0	0	0	0	0	0	0	0	0	0	0	0	0	0	0	0	0	0	0	0	0	0	0	0	0	0	0	0	0	0	0	0
hsa_miR_570_5p	1	0	0	0	0	0	0	0	0	0	0	0	0	0	0	0	0	0	0	0	0	0	0	0	0	0	0	0	0	0	0	0	0	0	0	0	0	0	0	0	0	0	0	0	0	0	0	0	0
hsa_miR_574_3p	8	9	21	16	16	13	20	19	20	23	18	11	8	26	21	25	21	49	19	38	44	27	18	23	5	31	30	21	16	33	12	32	18	37	34	27	33	26	28	29	40	18	20	25	37	22	28	8	33
hsa_miR_574_5p	2	0	0	0	0	0	0	0	0	0	0	0	2	0	10	1	4	4	4	1	0	0	0	0	0	0	0	0	0	0	0	0	0	0	0	0	0	0	0	0	0	0	0	0	0	0	0	0	0
hsa_miR_576_3p	6	0	0	0	0	0	0	0	0	0	0	7	4	5	17	4	3	11	5	8	7	0	0	0	0	0	0	0	0	0	0	5	7	12	5	8	12	11	7	16	12	12	7	8	5	12	4	9	4
hsa_miR_576_5p	8	18	9	8	14	18	15	12	24	23	20	10	11	31	24	18	22	25	15	18	19	8	21	14	15	23	12	25	12	26	25	13	13	32	15	22	31	26	13	20	39	12	14	22	13	24	28	5	25
hsa_miR_580_5p	2	0	0	0	0	0	0	0	0	0	0	0	0	0	0	0	0	0	0	0	0	0	0	0	0	0	0	0	0	0	0	0	0	0	0	0	0	0	0	0	0	0	0	0	0	0	0	0	0
hsa_miR_582_3p	8	10	4	5	5	3	5	1	11	6	0	5	6	13	16	13	5	12	4	3	2	3	6	3	14	3	4	4	2	13	1	0	3	4	11	4	13	18	3	4	2	4	9	9	4	11	6	11	4
hsa_miR_582_5p	3	0	0	0	0	0	0	0	0	0	0	0	0	0	0	0	0	0	0	0	0	0	0	1	5	2	2	3	1	10	0	0	0	0	0	0	0	0	0	0	0	0	0	0	0	0	0	0	0
hsa_miR_584_3p	8	4	8	7	6	5	4	18	5	8	12	4	6	12	11	9	11	11	8	16	5	9	4	12	10	5	4	11	3	5	5	7	4	9	8	6	1	5	13	22	16	9	5	8	9	13	7	7	5
hsa_miR_584_5p	8	244	583	378	776	492	519	516	534	877	461	608	509	1652	1116	458	586	914	573	1089	943	686	286	814	549	832	509	748	430	421	899	1170	426	1210	385	797	697	784	934	1478	871	974	338	673	1283	1128	744	392	777
hsa_miR_590_3p	8	70	65	74	62	22	99	49	92	90	64	24	54	113	90	93	123	37	24	83	92	55	55	74	91	75	63	82	85	75	62	74	78	141	111	108	37	42	79	84	108	98	92	116	62	110	61	72	88
hsa_miR_598_3p	8	13	15	22	10	6	16	15	10	7	12	7	11	25	14	9	19	14	8	13	15	15	12	8	15	11	10	27	10	19	11	16	21	16	9	17	12	16	10	14	30	11	24	12	17	20	17	17	14
hsa_miR_605_3p	1	0	0	0	0	0	0	0	0	0	0	0	0	0	0	0	0	0	0	0	0	0	0	0	0	0	0	0	0	0	0	0	0	0	0	0	0	0	0	0	0	0	0	0	0	0	0	0	0
hsa_miR_605_5p	2	0	0	0	0	0	0	0	0	0	0	0	0	0	0	0	0	0	0	0	0	0	0	0	0	0	0	0	0	0	0	0	0	0	0	0	0	0	0	0	0	0	0	0	0	0	0	0	0
hsa_miR_6069	1	0	0	0	0	0	0	0	0	0	0	0	0	0	0	0	0	0	0	0	0	0	0	0	0	0	0	0	0	0	0	0	0	0	0	0	0	0	0	0	0	0	0	0	0	0	0	0	0
hsa_miR_6081	8	6	8	5	14	6	3	1	23	3	3	10	7	8	10	24	5	16	24	27	3	12	2	1	7	12	30	4	7	23	8	23	14	3	16	10	10	30	34	19	14	1	8	20	23	2	10	11	20
hsa_miR_610	8	5	7	10	17	6	15	7	14	21	9	7	6	23	25	9	22	18	7	18	20	7	5	19	9	17	9	19	11	10	13	14	13	19	10	16	15	8	10	16	22	22	18	10	13	16	6	7	9
hsa_miR_6126	8	342	177	176	342	161	106	70	377	86	224	259	105	198	303	283	149	391	243	304	179	331	244	43	123	230	447	121	101	390	110	365	319	68	434	146	221	358	456	344	287	101	274	368	252	194	298	264	289
hsa_miR_6129	1	0	0	0	0	0	0	0	0	0	0	0	0	0	0	0	0	0	0	0	0	0	0	0	0	0	0	0	0	0	0	0	0	0	0	0	0	0	0	0	0	0	0	0	0	0	0	0	0
hsa_miR_6130	3	0	0	0	0	0	0	0	0	0	0	0	0	0	0	0	0	0	0	0	0	0	0	0	0	0	0	0	0	0	0	0	0	0	0	0	0	0	0	0	0	0	0	0	0	0	0	0	0
hsa_miR_6134	2	0	0	0	0	0	0	0	0	0	0	0	0	0	0	0	0	0	0	0	0	0	0	0	0	0	0	0	0	0	0	0	0	0	0	0	0	0	0	0	0	0	0	0	0	0	0	0	0
hsa_miR_616_5p	1	0	0	0	0	0	0	0	0	0	0	0	0	0	0	0	0	0	0	0	0	0	0	0	0	0	0	0	0	0	0	0	0	0	0	0	0	0	0	0	0	0	0	0	0	0	0	0	0
hsa_miR_619_5p	2	0	0	0	0	0	0	0	0	0	0	0	0	0	0	0	0	0	0	0	0	0	0	0	0	0	0	0	0	0	0	0	0	0	0	0	0	0	0	0	0	0	0	0	0	0	0	0	0
hsa_miR_624_5p	8	53	17	20	23	17	22	12	47	21	40	33	18	32	29	31	48	39	32	39	26	25	29	17	63	26	14	52	26	43	19	19	27	31	68	22	63	54	23	32	34	22	33	36	19	40	10	34	19
hsa_miR_627_3p	8	99	164	100	137	141	125	124	123	99	132	98	63	182	199	122	158	226	86	155	186	125	122	115	92	138	104	182	126	122	115	185	117	197	169	144	258	151	148	193	229	203	113	111	188	151	159	102	88
hsa_miR_627_5p	8	48	72	55	56	52	65	65	60	64	53	63	20	107	84	58	85	128	57	83	103	75	82	88	41	83	58	101	86	80	68	94	62	98	69	82	107	63	79	80	95	96	97	93	127	87	81	47	59
hsa_miR_628_3p	8	20	14	14	16	21	22	30	29	23	19	23	21	47	43	24	30	32	14	31	31	24	20	23	13	34	35	53	34	22	22	38	22	26	26	26	19	24	30	35	35	34	23	35	27	31	17	13	17
hsa_miR_628_5p	8	14	20	12	15	10	11	11	33	9	17	13	7	17	14	38	14	25	22	15	12	9	34	10	17	12	22	45	18	46	8	19	13	12	34	15	27	32	11	16	22	7	31	17	17	18	10	17	15
hsa_miR_6501_5p	7	0	0	0	0	0	0	0	0	0	0	1	1	8	1	10	4	4	2	5	14	0	2	4	5	5	1	15	11	1	3	2	9	7	6	7	3	3	2	6	10	2	7	7	1	3	1	4	6
hsa_miR_6503_3p	1	0	0	0	0	0	0	0	0	0	0	0	0	0	0	0	0	0	0	0	0	0	0	0	0	0	0	0	0	0	0	0	0	0	0	0	0	0	0	0	0	0	0	0	0	0	0	0	0
hsa_miR_6505_5p	1	0	0	0	0	0	0	0	0	0	0	0	0	0	0	0	0	0	0	0	0	0	0	0	0	0	0	0	0	0	0	0	0	0	0	0	0	0	0	0	0	0	0	0	0	0	0	0	0
hsa_miR_652_3p	8	91	285	157	235	154	199	313	177	179	304	151	73	398	142	172	332	342	151	290	258	227	190	267	149	216	185	471	255	175	164	322	202	367	149	248	148	267	265	305	278	151	210	270	267	230	134	115	174
hsa_miR_652_5p	1	0	0	0	0	0	0	0	0	0	0	0	0	0	0	0	0	0	0	0	0	0	0	0	0	0	0	0	0	0	0	0	0	0	0	0	0	0	0	0	0	0	0	0	0	0	0	0	0
hsa_miR_654_3p	8	37	44	37	79	31	54	36	72	29	70	33	26	108	38	85	63	58	32	62	73	38	117	31	5	58	94	88	64	95	32	77	50	71	25	74	39	32	31	97	94	17	45	52	58	111	33	12	60
hsa_miR_656_3p	1	0	0	0	0	0	0	0	0	0	0	0	0	0	0	0	0	0	0	0	0	0	0	0	0	0	0	0	0	0	0	0	0	0	0	0	0	0	0	0	0	0	0	0	0	0	0	0	0
hsa_miR_660_5p	8	184	89	43	106	76	83	65	117	45	85	52	161	159	290	103	117	161	66	88	133	64	87	65	270	92	70	184	108	105	66	62	65	132	223	133	184	98	51	92	164	107	125	82	69	143	121	132	114
hsa_miR_664a_3p	6	0	0	0	0	0	0	0	0	0	0	5	3	7	7	8	10	9	3	9	9	3	8	4	1	5	11	10	5	1	4	5	8	8	6	8	8	3	3	9	12	0	0	0	0	0	0	0	0
hsa_miR_664a_5p	8	8	15	10	13	12	10	15	18	14	9	7	4	23	10	19	18	21	7	8	10	9	18	13	3	15	16	16	13	13	12	17	18	28	12	16	19	16	11	11	23	13	14	24	18	13	10	8	7
hsa_miR_670_3p	1	0	0	0	0	0	0	0	0	0	0	0	0	0	0	0	0	0	0	0	0	0	0	0	14	0	0	0	0	0	0	0	0	0	0	0	0	0	0	0	0	0	0	0	0	0	0	0	0
hsa_miR_671_3p	8	13	17	21	21	26	17	10	25	35	10	32	11	59	24	21	27	38	34	38	32	23	27	22	12	39	27	21	22	29	25	42	27	39	15	27	24	34	40	39	35	33	13	22	59	24	14	19	23
hsa_miR_671_5p	8	50	55	35	55	35	30	79	62	35	83	39	51	89	111	51	58	94	40	52	76	42	34	47	117	43	42	139	77	45	42	56	35	68	129	65	137	65	48	94	69	81	31	42	50	63	62	60	42
hsa_miR_6734_3p	1	0	0	0	0	0	0	0	0	0	0	0	0	0	0	0	0	0	0	0	0	0	0	0	0	0	0	0	0	0	0	0	0	0	0	0	0	0	0	0	0	0	0	0	0	0	0	0	0
hsa_miR_6734_5p	8	0	4	4	8	3	4	5	7	5	10	3	0	14	4	1	5	5	3	1	5	5	3	2	0	1	6	10	6	2	4	8	5	13	2	10	5	4	5	12	10	0	4	12	8	10	3	1	7
hsa_miR_6763_3p	3	0	0	0	0	0	0	0	0	0	0	12	0	3	1	5	0	4	11	12	2	0	0	0	0	0	0	0	0	0	0	0	0	0	0	0	0	0	0	0	0	0	0	0	0	0	0	0	0
hsa_miR_676_3p	8	70	0	1	1	0	0	0	1	1	1	1	31	0	64	10	2	15	0	1	2	0	0	0	26	0	0	0	2	16	1	0	0	1	42	1	11	0	1	1	5	14	0	1	0	1	10	24	1
hsa_miR_6783_5p	1	0	0	0	0	0	0	0	0	0	0	0	0	0	0	0	0	0	0	0	0	0	0	0	0	0	0	0	0	0	0	0	0	0	0	0	0	0	0	0	0	0	0	0	0	0	0	0	0
hsa_miR_6790_3p	1	0	0	0	0	0	0	0	0	0	0	0	0	0	0	0	0	0	0	0	0	0	0	0	0	0	0	0	0	0	0	0	0	0	0	0	0	0	0	0	0	0	0	0	0	0	0	0	0
hsa_miR_6793_5p	1	0	0	0	0	0	0	0	0	0	0	0	0	0	0	0	0	0	0	0	0	0	0	0	0	0	0	0	0	0	0	0	0	0	0	0	0	0	0	0	0	0	0	0	0	0	0	0	0
hsa_miR_6827_5p	1	0	0	0	0	0	0	0	0	0	0	0	0	0	0	0	0	0	0	0	0	0	0	0	0	0	0	0	0	0	0	0	0	0	0	0	0	0	0	0	0	0	0	0	0	0	0	0	0
hsa_miR_6832_3p	2	0	0	0	0	0	0	0	0	0	0	0	0	0	0	0	0	0	0	0	0	0	0	0	0	0	0	0	0	0	0	0	0	0	0	0	0	0	0	0	0	0	0	0	0	0	0	0	0
hsa_miR_6833_3p	1	0	0	0	0	0	0	0	0	0	0	0	0	0	0	0	0	0	0	0	0	0	0	0	0	0	0	0	0	0	0	0	0	0	0	0	0	0	0	0	0	0	0	0	0	0	0	0	0
hsa_miR_6847_5p	6	0	0	0	0	0	0	0	0	0	0	3	1	4	5	2	10	6	1	6	4	4	5	10	2	8	3	5	5	3	5	0	0	0	0	0	0	0	0	0	0	2	2	10	6	6	4	1	2
hsa_miR_6861_5p	1	0	0	0	0	0	0	0	0	0	0	0	0	0	0	0	0	0	0	0	0	0	0	0	0	0	0	0	0	0	0	0	0	0	0	0	0	0	0	0	0	0	0	0	0	0	0	0	0
hsa_miR_6865_5p	8	13	25	8	35	34	18	12	46	25	27	67	4	32	8	29	26	17	63	45	30	40	28	13	9	29	56	17	19	15	19	88	57	30	22	38	13	41	77	67	50	8	26	55	41	23	18	12	38
hsa_miR_6866_5p	2	0	0	0	0	0	0	0	0	0	0	0	0	0	0	0	0	0	0	0	0	0	0	0	0	0	0	0	0	0	0	0	0	0	0	0	0	0	0	0	0	0	0	0	0	0	0	0	0
hsa_miR_6872_3p	3	0	0	0	0	0	0	0	0	0	0	0	0	0	0	0	0	0	0	0	0	0	0	0	0	0	0	0	0	0	0	0	0	0	0	0	0	0	0	0	0	3	1	4	5	0	11	9	4
hsa_miR_7_1_3p	8	11	8	10	12	8	6	4	14	9	8	5	7	7	20	10	10	12	6	11	8	11	9	6	10	5	5	14	10	12	7	9	8	10	10	5	11	15	9	9	5	6	16	14	8	11	4	10	4
hsa_miR_718	3	0	0	0	0	0	0	0	0	0	0	0	0	0	0	0	0	0	0	0	0	0	0	0	0	0	0	0	0	0	0	0	0	0	0	0	0	0	0	0	0	1	1	11	5	4	2	3	6
hsa_miR_744_5p	8	121	435	230	405	304	247	254	366	469	256	306	125	804	303	340	333	561	320	614	457	406	261	415	66	547	288	376	314	321	427	751	241	739	283	333	359	402	461	622	468	403	213	415	887	473	337	147	378
hsa_miR_7_5p	8	4295	4829	3132	5562	2951	3637	2727	5210	4037	3640	2292	4432	8951	6819	4229	5352	4447	2362	6000	5611	4305	4269	4916	4461	5620	4052	6097	5605	3605	5114	6414	4341	7636	4829	5425	4684	3724	4737	7648	6864	7284	4024	4481	7374	8420	3742	3743	3349
hsa_miR_7641	1	0	0	0	0	0	0	0	0	0	0	0	0	0	0	0	0	0	0	0	0	0	0	0	0	0	0	0	0	0	0	0	0	0	0	0	0	0	0	0	0	0	0	0	0	0	0	0	0
hsa_miR_769_3p	1	0	0	0	0	0	0	0	0	0	0	0	0	0	0	0	0	0	0	0	0	0	0	0	0	0	0	0	0	0	0	0	0	0	0	0	0	0	0	0	0	0	0	0	0	0	0	0	0
hsa_miR_769_5p	8	10	15	7	26	8	13	11	10	17	7	14	12	40	23	12	24	24	8	15	26	14	15	20	16	19	5	31	17	8	27	25	16	38	13	31	17	12	16	24	33	21	14	16	31	19	19	16	21
hsa_miR_7705	1	0	0	0	0	0	0	0	0	0	0	0	0	0	0	0	0	0	0	0	0	0	0	0	0	0	0	0	0	0	0	0	0	0	0	0	0	0	0	0	0	0	0	0	0	0	0	0	0
hsa_miR_7976	8	5	11	11	10	9	13	12	14	10	9	5	1	18	16	8	11	15	5	4	19	15	8	11	2	12	14	14	11	7	13	13	13	19	15	16	17	16	13	12	17	14	14	20	11	13	11	4	17
hsa_miR_7977	8	31	21	13	26	26	12	10	78	33	33	64	15	31	26	65	30	46	80	71	29	40	15	16	15	43	63	10	11	42	32	105	38	24	50	22	31	96	78	53	21	17	22	79	49	23	25	24	52
hsa_miR_802	4	0	0	0	0	0	0	0	0	0	0	0	0	0	0	0	0	0	0	0	0	1	2	0	29	0	2	1	1	2	2	0	0	0	0	0	0	0	0	0	0	0	0	0	0	0	0	0	0
hsa_miR_8485	2	0	0	0	0	0	0	0	0	0	0	0	0	0	0	0	0	0	0	0	0	0	0	0	0	0	0	0	0	0	0	2	2	4	8	12	0	1	1	1	11	0	0	0	0	0	0	0	0
hsa_miR_873_3p	3	0	0	0	0	0	0	0	0	0	0	0	3	10	11	0	0	1	1	1	3	0	0	0	0	0	0	0	0	0	0	8	0	2	0	1	0	0	4	14	5	0	0	0	0	0	0	0	0
hsa_miR_873_5p	8	1	20	2	46	0	6	1	0	2	0	0	24	91	51	0	0	0	0	28	9	26	0	5	1	5	1	0	2	0	6	36	3	3	0	8	1	1	26	55	11	6	2	1	27	64	8	0	6
hsa_miR_874_3p	1	0	0	0	0	0	0	0	0	0	0	0	0	0	0	0	0	0	0	0	0	0	0	0	0	0	0	0	0	0	0	0	0	0	0	0	0	0	0	0	0	0	0	0	0	0	0	0	0
hsa_miR_877_3p	1	0	0	0	0	0	0	0	0	0	0	0	0	0	0	0	0	0	0	0	0	0	0	0	0	0	0	0	0	0	0	0	0	0	0	0	0	0	0	0	0	0	0	0	0	0	0	0	0
hsa_miR_877_5p	4	2	3	2	2	0	1	6	2	2	10	0	0	0	0	0	0	0	0	0	0	3	2	5	3	7	8	16	3	3	1	0	0	0	0	0	0	0	0	0	0	0	0	0	0	0	0	0	0
hsa_miR_889_3p	5	0	0	0	0	0	0	0	0	0	0	0	0	0	0	0	0	0	0	0	0	3	11	0	5	0	6	12	1	18	1	0	0	0	0	0	0	0	0	0	0	3	4	2	7	7	4	3	5
hsa_miR_92a_3p	8	10373	24384	22265	27012	26224	15738	24679	32594	36946	19240	28125	9983	41107	18986	20403	35433	35640	26027	44370	38139	26912	16444	28518	12254	32041	29714	27420	22776	23874	36930	54505	31485	43098	14071	23650	24555	36020	35089	44329	31491	22808	22774	42311	49483	27028	20379	15679	31267
hsa_miR_92b_3p	8	33	60	44	72	57	48	46	75	82	45	60	23	114	65	57	70	76	61	92	87	56	47	60	35	65	81	66	58	60	59	95	61	101	32	70	74	81	76	85	63	68	49	87	101	67	35	31	87
hsa_miR_92b_5p	2	0	0	0	0	0	0	0	0	0	0	0	0	0	0	0	0	0	0	0	0	0	0	0	0	0	0	0	0	0	0	0	0	0	0	0	0	0	0	0	0	0	0	0	0	0	0	0	0
hsa_miR_933	1	0	0	0	0	0	0	0	0	0	0	0	0	0	0	0	0	0	0	0	0	0	0	0	0	0	0	0	0	0	0	0	0	0	0	0	0	0	0	0	0	0	0	0	0	0	0	0	0
hsa_miR_93_3p	8	128	164	133	150	152	110	135	216	233	96	142	123	289	201	175	208	308	177	262	230	165	85	207	109	213	177	161	130	144	242	314	184	298	159	177	250	193	197	308	231	195	138	226	251	225	167	146	209
hsa_miR_93_5p	8	25247	41099	29465	40243	31021	29171	36852	36835	31672	30935	26907	24058	65721	43637	29489	56699	51656	25990	47374	56026	35519	28542	40594	33266	41909	27996	48432	38254	28727	33100	58388	43415	53736	31309	38872	40282	40124	39815	51035	60624	47659	40044	45118	62197	49355	29259	31320	33596
hsa_miR_939_5p	2	0	0	0	0	0	0	0	0	0	0	0	0	0	0	0	0	0	0	0	0	0	0	0	0	0	0	0	0	0	0	0	0	0	0	0	0	0	0	0	0	0	0	0	0	0	0	0	0
hsa_miR_9_3p	4	0	0	0	0	0	0	0	0	0	0	0	0	0	0	0	0	0	0	0	0	0	0	0	0	0	0	0	0	0	0	1	2	0	1	1	29	8	2	0	0	0	0	0	0	0	0	0	0
hsa_miR_942_3p	8	8	16	2	9	13	6	4	17	7	14	15	12	22	9	20	9	24	10	13	17	6	18	11	11	18	15	11	16	9	12	30	6	22	15	14	24	23	12	14	9	11	10	10	21	9	12	8	11
hsa_miR_942_5p	8	369	460	130	241	223	277	186	459	223	220	177	299	430	271	309	203	415	211	342	350	460	384	242	244	275	243	293	471	379	176	507	126	395	407	459	541	274	247	330	412	211	121	149	656	281	173	154	240
hsa_miR_95_3p	5	0	0	0	0	0	0	0	0	0	0	5	8	4	7	0	16	7	5	4	3	0	0	0	0	0	0	0	0	0	0	5	7	10	3	9	10	3	3	2	8	4	9	13	1	1	4	12	3
hsa_miR_9_5p	8	14	9	7	8	30	6	23	14	7	23	11	8	12	22	13	7	37	21	12	7	11	13	4	26	16	8	43	9	17	7	11	16	7	11	10	81	19	9	9	15	6	23	12	22	15	1	7	6
hsa_miR_96_5p	8	14	27	18	10	19	13	7	19	15	11	20	9	9	5	18	25	28	20	61	17	42	5	23	13	13	6	18	19	9	12	45	26	30	27	17	32	27	48	14	20	16	25	21	33	14	10	18	15
hsa_miR_98_3p	1	0	0	0	0	0	0	0	0	0	0	0	0	0	0	0	0	0	0	0	0	0	0	0	0	0	0	0	0	0	0	0	0	0	0	0	0	0	0	0	0	0	0	0	0	0	0	0	0
hsa_miR_98_5p	8	302	448	421	408	373	394	508	604	551	603	399	278	695	528	456	694	510	402	600	559	393	442	487	529	535	411	957	503	468	403	552	542	783	610	622	489	584	547	614	676	406	500	643	444	639	371	394	369
hsa_miR_99a_5p	8	28	26	21	28	16	23	18	18	6	10	11	57	32	103	14	34	47	3	26	40	28	23	16	119	20	15	34	13	32	18	24	18	25	60	22	65	12	15	29	40	39	26	21	23	17	23	62	18
hsa_miR_99b_5p	8	13	3	9	5	5	0	5	12	10	7	10	32	14	49	9	8	12	3	12	7	6	10	6	34	11	11	10	6	10	12	18	11	15	8	3	13	3	11	12	9	4	8	11	10	10	4	13	2
piRNA	8	0	0	0	0	0	0	0	0	0	0	0	0	0	0	0	0	0	0	0	0	0	0	0	0	0	0	0	0	0	0	0	0	0	0	0	0	0	0	0	0	0	0	0	0	0	0	0	0
[truncated: 27 more columns]
