# Supplementary material for: Transcriptomic Analysis Reveals Host miRNAs Correlated with Immune Gene Dysregulation during Fatal Disease Progression in the Ebola Virus Cynomolgus Macaque Disease Model
Source: Microorganisms. 2021 Mar 23;9(3):665. doi: 10.3390/microorganisms9030665 (PMC8005181; doi:10.3390/microorganisms9030665)
Supplement: Supplementary file 1 [file microorganisms-09-00665-s001.zip › Supplemental Table S5 - Study design and clinical outcome.xlsx]

## Sheet: Sheet1
Table S5: Study design and clinical outcome for NHPs challenged with EBOV
NHP ID	Day of Disease Onset	Day of Lethality Post-Challenge	Outcome	Elevated BUN	Elevated CRE	Elevated ALT	Elevated AST	Clinical Symptoms
1	N/A	6	Euthanized	ND	ND	ND	ND	None
2	5	7	Euthanized	YES	YES	YES	YES	Widespread rash
3	5	6	Euthanized	YES	YES	YES	YES	Widespread rash, Lymphadenopathy
4	5	6	Succumbed	ND	ND	ND	ND	Widespread rash
5	5	7	Euthanized	YES	YES	YES	YES	Widespread rash
6	6	8	Euthanized	NO	YES	YES	YES	Widespread rash, Lymphadenopathy
7	5	6	Succumbed	ND	ND	ND	ND	Widespread rash
8	6	7	Euthanized	YES	YES	YES	YES	Widespread rash
9	5	6	Euthanized	YES	YES	YES	YES	Widespread rash, nose bleed
