# Supplementary material for: Transcriptomic Analysis Reveals Host miRNAs Correlated with Immune Gene Dysregulation during Fatal Disease Progression in the Ebola Virus Cynomolgus Macaque Disease Model
Source: Microorganisms. 2021 Mar 23;9(3):665. doi: 10.3390/microorganisms9030665 (PMC8005181; doi:10.3390/microorganisms9030665)
Supplement: Supplementary file 1 [file microorganisms-09-00665-s001.zip › Supplemental Table S6 - mRNA expression analysis.xlsx]

## Sheet: mrna_nstringn_datat_amr
Label	_Row	Variance_ID	Variance_Residual	SumVariance	SampleVariance	PropVar_ID	PropVar_Residual	RSquare	N2RLL	AIC	AICC	BIC	F_T3_ANNOVA	NDF_T3_ANNOVA	DDF_T3_ANNOVA	PrF_T3_ANNOVA	Lsmean ANNOVA Day0	Lsmean ANNOVA Day1	Lsmean ANNOVA Day2	Lsmean ANNOVA Day3	Lsmean ANNOVA Day4	Lsmean ANNOVA Day5	Lsmean ANNOVA Day6	Lsmean ANNOVA Day7	Lsmean ANNOVA Day8	Std Lsmean ANNOVA Day0	Std Lsmean ANNOVA Day1	Std Lsmean ANNOVA Day2	Std Lsmean ANNOVA Day3	Std Lsmean ANNOVA Day4	Std Lsmean ANNOVA Day5	Std Lsmean ANNOVA Day6	Std Lsmean ANNOVA Day7	Std Lsmean ANNOVA Day8	Diff of ANNOVA = (Day1)-(Day0)	Diff of ANNOVA = (Day2)-(Day0)	Diff of ANNOVA = (Day3)-(Day0)	Diff of ANNOVA = (Day4)-(Day0)	Diff of ANNOVA = (Day5)-(Day0)	Diff of ANNOVA = (Day6)-(Day0)	Diff of ANNOVA = (Day7)-(Day0)	Diff of ANNOVA = (Day8)-(Day0)	Exp2 Diff of ANNOVA = (Day1)-(Day0)	Exp2 Diff of ANNOVA = (Day2)-(Day0)	Exp2 Diff of ANNOVA = (Day3)-(Day0)	Exp2 Diff of ANNOVA = (Day4)-(Day0)	Exp2 Diff of ANNOVA = (Day5)-(Day0)	Exp2 Diff of ANNOVA = (Day6)-(Day0)	Exp2 Diff of ANNOVA = (Day7)-(Day0)
PTGS1	1	0.188837	0.423332	0.612169	0.622722	0.308472	0.691528	0.459033	141.796	145.796	146.015	145.955	1.86192	8	58	0.0838457	5.42527	5.3591	5.2213	5.43916	5.09345	5.8214	5.77548	6.35394	5.86145	-0.431485	-0.600167	-0.951491	-0.396057	-1.27745	0.578476	0.461406	1.93619	0.680579	-0.0661622	-0.203962	0.0138958	-0.331812	0.396137	0.350219	0.928672	0.436185	-1.04693	-1.15186	1.00968	-1.25859	1.31598	1.27475	1.90352
C1QBP	2	0.26935	0.264126	0.533477	0.498187	0.504896	0.495104	0.584223	119.311	123.311	123.529	123.47	1.36664	8	58	0.230421	7.49052	7.54342	7.0513	7.58991	7.56678	7.68034	7.07264	7.45769	7.43795	0.261956	0.499942	-1.71374	0.709037	0.604982	1.11581	-1.61773	0.114272	0.025475	0.0529068	-0.439217	0.0993907	0.0762581	0.18982	-0.417873	-0.0328316	-0.052572	1.03735	-1.35587	1.07132	1.05428	1.14062	-1.33596	-1.02302
MAFK	3	0.0428506	0.430111	0.472961	0.868793	0.0906006	0.909399	0.5884	136.16	140.16	140.378	140.319	8.69543	8	58	1.03614e-07	4.81572	4.80253	4.80331	4.65523	4.45425	5.74602	5.22562	7.27341	5.98888	-0.548119	-0.562822	-0.561958	-0.727095	-0.951228	0.489355	-0.0910012	2.19269	0.760183	-0.0131838	-0.0124098	-0.160488	-0.36147	0.930308	0.4099	2.45769	1.17316	-1.00918	-1.00864	-1.11767	-1.28473	1.90568	1.32859	5.49337
NFE2L2	4	0	0.201367	0.201367	0.414122	0	1	0.57269	87.9923	89.9923	90.0637	90.0717	9.71661	8	58	1.96573e-08	8.46056	8.80737	8.62036	8.73002	9.16584	9.75314	9.84515	9.06831	8.85796	-1.18721	-0.46957	-0.856559	-0.629641	0.272192	1.48746	1.67785	0.07037	-0.364891	0.34681	0.159792	0.269453	0.705277	1.29257	1.38458	0.607744	0.397398	1.27175	1.11713	1.20535	1.63046	2.44964	2.61096	1.52387
SOCS1	5	0.0378149	0.469908	0.507723	2.1201	0.0744794	0.925521	0.814504	140.664	144.664	144.882	144.823	29.5809	8	58	8.91702e-18	4.89276	5.00419	4.88896	6.57822	7.73655	7.42756	7.38114	8.2204	7.91619	-1.28692	-1.20631	-1.28967	-0.067676	0.770245	0.546727	0.513148	1.12026	0.900193	0.111426	-0.00380635	1.68546	2.84378	2.5348	2.48838	3.32764	3.02342	1.0803	-1.00264	3.21642	7.17901	5.79495	5.61147	10.0397
DOCK9	6	0.370699	0.252029	0.622728	0.674859	0.595282	0.404718	0.708341	118.919	122.919	123.137	123.078	5.52014	8	58	3.39542e-05	6.48109	6.32834	6.22728	5.99245	5.7664	5.54037	5.39264	5.33237	5.37893	1.46949	1.12651	0.899575	0.372289	-0.135293	-0.642816	-0.974544	-1.10987	-1.00533	-0.152747	-0.25381	-0.488638	-0.71469	-0.940715	-1.08845	-1.14872	-1.10216	-1.11168	-1.19235	-1.40312	-1.64113	-1.91948	-2.12646	-2.21717
TLR6	7	0.131174	0.542442	0.673616	1.22794	0.194731	0.805269	0.642795	153.069	157.069	157.287	157.228	9.56203	8	58	2.51397e-08	8.30159	8.79303	9.17555	8.94624	10.67	10.0704	9.44045	8.5114	7.96589	-0.925155	-0.353668	0.0911512	-0.17551	1.82897	1.13172	0.3992	-0.681175	-1.31553	0.491443	0.873959	0.644647	2.36837	1.76878	1.13886	0.209807	-0.3357	1.40585	1.83269	1.56336	5.16357	3.40767	2.20207	1.15653
STAT4	8	0.0587191	0.0683773	0.127096	0.219532	0.462005	0.537995	0.755154	39.8683	43.8683	44.0865	44.0272	15.1255	8	58	1.02957e-11	6.68549	6.46242	6.29017	6.49	6.12039	6.13372	5.72564	5.46709	5.51336	1.33361	0.826648	0.435158	0.889312	0.0493089	0.0795996	-0.847865	-1.43546	-1.33031	-0.223063	-0.395319	-0.195491	-0.565094	-0.551766	-0.959852	-1.2184	-1.17213	-1.16721	-1.31523	-1.14511	-1.47948	-1.46588	-1.94511	-2.32688
CCL15	9	0	0.258196	0.258196	0.273758	0	1	0.171168	102.411	104.411	104.482	104.49	1.49725	8	58	0.178224	4.81572	4.80253	4.80331	4.65523	4.45425	5.20755	4.54522	5.009	4.48415	0.252069	0.199086	0.202197	-0.3929	-1.2006	1.82676	-0.835	1.02883	-1.08044	-0.0131838	-0.0124098	-0.160488	-0.36147	0.391832	-0.270496	0.193281	-0.331568	-1.00918	-1.00864	-1.11767	-1.28473	1.31206	-1.20622	1.14336
C1QA	10	0.00565402	0.3404	0.346054	0.736065	0.0163385	0.983661	0.599434	119.329	123.329	123.548	123.488	10.4787	8	58	6.00983e-09	4.84932	4.84891	4.80331	4.83036	5.21387	6.39596	5.89438	6.72197	5.70022	-0.846177	-0.846724	-0.908586	-0.871892	-0.351688	1.25173	0.571373	1.69395	0.308016	-0.000403488	-0.0460098	-0.0189578	0.364552	1.54664	1.04506	1.87266	0.850905	-1.00028	-1.03241	-1.01323	1.28748	2.92136	2.06345	3.66206
C8B	11	0	0.380247	0.380247	0.522694	0	1	0.360703	124.863	126.863	126.934	126.942	4.09059	8	58	0.000647124	4.81572	4.80253	4.80331	4.65523	5.04228	5.61814	5.44584	6.23688	5.50335	-0.76145	-0.786675	-0.785194	-1.06851	-0.327964	0.773817	0.444156	1.95764	0.554178	-0.0131838	-0.0124098	-0.160488	0.226567	0.802426	0.630125	1.42117	0.687629	-1.00918	-1.00864	-1.11767	1.17005	1.74403	1.5477	2.67802
TSLP	12	0	0.108315	0.108315	0.102474	0	1	0.0711166	52.0275	54.0275	54.099	54.107	0.55507	8	58	0.809862	4.81572	4.80253	4.80331	4.65523	4.79245	4.78992	4.97181	4.88823	4.48415	0.270632	0.175656	0.181232	-0.885519	0.103054	0.0847822	1.39515	0.792995	-2.11798	-0.0131838	-0.0124098	-0.160488	-0.0232619	-0.0257982	0.156097	0.0725105	-0.331568	-1.00918	-1.00864	-1.11767	-1.01625	-1.01804	1.11427	1.05154
HMGB1	13	0	0.106147	0.106147	0.177517	0	1	0.474525	50.8549	52.8549	52.9263	52.9344	6.54705	8	58	4.66726e-06	10.5989	10.7088	10.4153	10.9222	11.0762	10.7672	10.3537	9.9647	9.94214	0.179782	0.457508	-0.283852	0.996307	1.38515	0.604838	-0.439393	-1.42168	-1.47866	0.109977	-0.183595	0.323337	0.477317	0.168319	-0.245188	-0.634167	-0.65673	1.07921	-1.13571	1.25122	1.39215	1.12375	-1.18525	-1.55204
MX1	14	0	0.737424	0.737424	9.76353	0	1	0.933627	163.278	165.278	165.35	165.358	101.98	8	58	2.79853e-31	7.11259	7.98325	8.10201	12.7243	13.729	14.1106	13.775	12.9861	13.1211	-1.5278	-1.22572	-1.18451	0.419221	0.767812	0.900238	0.783783	0.510072	0.556912	0.870659	0.989421	5.61168	6.61638	6.99806	6.66241	5.87352	6.00853	1.8285	1.98539	48.8971	98.1135	127.828	101.294	58.6283
STAT2	15	0	0.322731	0.322731	2.17255	0	1	0.869457	115.35	117.35	117.422	117.43	48.2873	8	58	7.52685e-23	8.47676	9.12492	9.2218	11.2637	12.1304	11.5985	11.0425	10.7952	10.4949	-1.59156	-1.07166	-0.993957	0.643888	1.3391	0.912444	0.466472	0.268083	0.0271879	0.648157	0.745033	2.78695	3.65368	3.12176	2.56577	2.31843	2.01811	1.56717	1.67601	6.9017	12.5854	8.70452	5.92069	4.9879
IL8	16	0.273415	0.843277	1.11669	1.74051	0.244844	0.755156	0.611422	180.083	184.083	184.301	184.242	7.90489	8	58	3.99585e-07	11.2039	9.9885	12.0253	10.7313	10.6737	12.752	12.6814	10.7869	10.7103	-0.0819242	-1.32919	0.761049	-0.566856	-0.625984	1.50685	1.43435	-0.509878	-0.588412	-1.21537	0.82141	-0.472527	-0.530143	1.54813	1.47749	-0.417007	-0.493532	-2.322	1.76713	-1.38754	-1.44407	2.92438	2.78464	-1.33515
ILF3	17	0.014172	0.0463826	0.0605545	0.218491	0.234037	0.765963	0.82947	11.5628	15.5628	15.781	15.7217	30.1658	8	58	5.7088e-18	8.26102	8.19931	8.07154	8.0074	7.53512	7.33056	7.17851	7.31005	7.25738	1.3006	1.16166	0.873941	0.729518	-0.333969	-0.794603	-1.13698	-0.840787	-0.959382	-0.0617032	-0.189476	-0.253613	-0.725895	-0.930457	-1.08251	-0.950967	-1.00363	-1.0437	-1.14035	-1.19219	-1.65393	-1.90588	-2.11771	-1.93317
DEFA1	18	1.09741	0.621404	1.71882	1.84884	0.63847	0.36153	0.737945	172.449	176.449	176.667	176.608	7.1682	8	58	1.48211e-06	7.24999	7.53839	7.65206	7.87349	8.53043	9.1273	8.7707	9.17397	9.96754	-1.29769	-0.980938	-0.856095	-0.612903	0.108611	0.764146	0.372495	0.815396	1.68697	0.288401	0.402071	0.623499	1.28044	1.87731	1.52071	1.92397	2.71755	1.22129	1.3214	1.54061	2.42913	3.6739	2.86932	3.79467
AREG	19	0.00480338	0.259305	0.264108	0.39296	0.0181871	0.981813	0.429271	103.642	107.642	107.86	107.801	5.12014	8	58	7.5816e-05	4.81572	4.80253	4.80331	4.65523	4.73924	5.88035	5.48065	5.27911	5.28558	-0.636873	-0.668356	-0.666508	-1.02012	-0.819495	1.90548	0.950987	0.469718	0.485172	-0.0131838	-0.0124098	-0.160488	-0.0764745	1.06463	0.66493	0.463394	0.469866	-1.00918	-1.00864	-1.11767	-1.05444	2.09163	1.58549	1.37878
IL22	20	0.0433907	0.448671	0.492062	0.746933	0.0881814	0.911819	0.50012	138.518	142.518	142.736	142.677	5.77725	8	58	2.04434e-05	4.81572	4.80253	4.80331	4.65523	4.45425	5.81435	5.11759	6.6391	5.71355	-0.543549	-0.562113	-0.561023	-0.769531	-1.05253	0.862609	-0.11848	2.02394	0.720681	-0.0131838	-0.0124098	-0.160488	-0.36147	0.998629	0.301877	1.82338	0.897834	-1.00918	-1.00864	-1.11767	-1.28473	1.9981	1.23275	3.5391
MAP3K1	21	0.0029679	0.17712	0.180088	0.193518	0.0164803	0.98352	0.20732	81.4458	85.4458	85.664	85.6047	1.6641	8	58	0.126931	8.70627	8.57294	8.74574	8.52063	9.11968	8.68732	8.69863	8.34609	8.47638	0.245521	-0.364768	0.426201	-0.604236	2.13788	0.158793	0.21057	-1.40318	-0.806784	-0.133326	0.0394721	-0.185642	0.413414	-0.018947	-0.00763555	-0.360183	-0.229891	-1.09682	1.02774	-1.13732	1.33183	-1.01322	-1.00531	-1.28359
HLA-C	22	7.33557	0.266381	7.60195	6.91631	0.964959	0.0350411	0.97022	142.104	146.104	146.322	146.262	2.52601	8	58	0.0197747	7.51713	7.48367	7.81833	7.75702	8.25103	8.234	7.93107	7.85513	7.5815	-1.09328	-1.21191	-0.0251681	-0.242585	1.50922	1.44883	0.374607	0.105302	-0.865015	-0.033455	0.301206	0.239894	0.733901	0.716872	0.413942	0.337998	0.06437	-1.02346	1.23217	1.18091	1.66313	1.64361	1.33232	1.264
IL21	23	0.0638047	0.0802846	0.144089	0.247925	0.442814	0.557186	0.745138	48.7079	52.7079	52.9261	52.8668	14.6632	8	58	1.83239e-11	7.23421	6.9318	6.81627	6.89943	6.57838	6.43551	6.13197	6.19227	5.74808	1.45178	0.808241	0.562392	0.739359	0.056159	-0.247868	-0.893808	-0.765502	-1.71075	-0.30241	-0.417938	-0.334779	-0.655826	-0.798694	-1.10223	-1.04194	-1.48613	-1.2332	-1.33602	-1.26118	-1.57552	-1.73953	-2.14687	-2.05899
ANP32B	24	0.0232159	0.0615034	0.0847193	0.139946	0.274033	0.725967	0.648889	29.0129	33.0129	33.2311	33.1718	8.36587	8	58	1.80624e-07	8.77118	8.69155	8.54972	8.53473	8.1536	8.20194	8.1953	8.18668	8.75585	1.22257	0.920429	0.382337	0.325441	-1.12058	-0.937164	-0.962356	-0.995064	1.16438	-0.0796345	-0.221459	-0.236455	-0.61758	-0.569238	-0.575877	-0.584498	-0.0153355	-1.05675	-1.16591	-1.17809	-1.5343	-1.48374	-1.49058	-1.49952
LCP2	25	0.0392188	0.251241	0.29046	0.480749	0.135023	0.864977	0.571683	106.557	110.557	110.775	110.716	7.15937	8	58	1.50607e-06	9.94207	10.2803	10.3279	10.6908	11.1037	10.5823	10.0454	9.27635	9.27936	-0.37128	0.180106	0.257773	0.849472	1.5227	0.672509	-0.202799	-1.45669	-1.45179	0.338184	0.385819	0.748728	1.16164	0.640191	0.103335	-0.665721	-0.662712	1.26416	1.3066	1.68031	2.23712	1.55854	1.07425	-1.58636
TRAF5	26	0.0724305	0.185913	0.258344	0.614985	0.280365	0.719635	0.758669	93.339	97.339	97.5572	97.4979	17.9395	8	58	3.84896e-13	6.71339	6.58323	6.25538	6.21664	5.64464	5.25365	5.00689	5.19168	4.72306	1.34342	1.16524	0.716423	0.663375	-0.119675	-0.654947	-0.992751	-0.739776	-1.38131	-0.13016	-0.458002	-0.496752	-1.06874	-1.45974	-1.7065	-1.52171	-1.99032	-1.09441	-1.37364	-1.41103	-2.09761	-2.75059	-3.26367	-2.8713
MAF	27	0.0662825	0.217706	0.283989	0.437053	0.233398	0.766602	0.599819	101.226	105.226	105.444	105.385	8.21725	8	58	2.32819e-07	6.67046	6.40575	6.41777	6.77768	6.30218	5.77961	5.87439	5.11777	4.9249	0.971652	0.570017	0.588259	1.13433	0.412876	-0.379983	-0.236182	-1.38417	-1.6768	-0.264713	-0.25269	0.107221	-0.368283	-0.890846	-0.796069	-1.55269	-1.74556	-1.2014	-1.19143	1.07715	-1.29082	-1.85426	-1.73636	-2.93364
TGFB3	28	0.00182908	0.0777368	0.0795659	0.106665	0.0229882	0.977012	0.371953	34.0141	38.0141	38.2323	38.173	3.90656	8	58	0.000959753	4.81572	4.80253	4.80331	4.65523	4.45425	4.4456	4.25187	4.67008	4.4713	1.09602	1.03006	1.03393	0.293068	-0.712484	-0.755757	-1.72503	0.367348	-0.627155	-0.0131838	-0.0124098	-0.160488	-0.36147	-0.370119	-0.56385	-0.145642	-0.344415	-1.00918	-1.00864	-1.11767	-1.28473	-1.29246	-1.47821	-1.10622
NOTCH1	29	0.126078	0.2609	0.386978	0.916367	0.325802	0.674198	0.773835	114.166	118.166	118.384	118.324	19.034	8	58	1.17597e-13	5.61241	5.60597	5.97142	5.6413	6.65257	7.16786	7.40263	7.91723	6.99027	-1.07405	-1.08142	-0.663359	-1.041	0.115856	0.70533	0.973896	1.56258	0.502169	-0.00644472	0.359005	0.0288869	1.04016	1.55545	1.79022	2.30481	1.37785	-1.00448	1.28254	1.02022	2.05645	2.93925	3.45866	4.94104
MAP4K4	30	0.0929628	0.235895	0.328858	0.39994	0.282684	0.717316	0.529269	107.21	111.21	111.428	111.369	3.74445	8	58	0.00136143	8.60043	8.67086	8.69291	8.73525	8.97417	9.35802	9.31009	8.11108	8.57536	-0.466786	-0.284625	-0.227601	-0.118091	0.499871	1.49266	1.36869	-1.73248	-0.531636	0.0704291	0.0924763	0.134816	0.373739	0.757582	0.709652	-0.489357	-0.0250731	1.05003	1.0662	1.09795	1.29571	1.69065	1.63541	-1.40382
TLR2	31	0.0571923	0.304702	0.361894	1.23361	0.158036	0.841964	0.798734	118.496	122.496	122.714	122.655	25.1261	8	58	3.3967e-16	8.84836	9.04418	9.62403	10.1221	11.2418	11.2883	10.9979	10.0475	9.76307	-1.39316	-1.17669	-0.535675	0.0148902	1.2528	1.30413	0.983171	-0.0674819	-0.381971	0.195816	0.775664	1.27369	2.39347	2.4399	2.14958	1.19918	0.914701	1.14537	1.71198	2.4178	5.2542	5.42605	4.43697	2.29609
AIRE	32	0.0477335	0.467349	0.515083	0.839574	0.0926716	0.907328	0.53756	141.054	145.054	145.273	145.213	6.82561	8	58	2.77675e-06	4.81572	4.80253	4.80331	4.65523	4.45425	6.12745	5.27482	6.63913	5.57983	-0.572032	-0.589843	-0.588797	-0.788846	-1.06037	1.20008	0.0481991	1.89134	0.460262	-0.0131838	-0.0124098	-0.160488	-0.36147	1.31174	0.459101	1.82341	0.764115	-1.00918	-1.00864	-1.11767	-1.28473	2.4824	1.37469	3.53917
IKZF2	33	0.0465728	0.136123	0.182696	0.256275	0.25492	0.74508	0.574592	74.5802	78.5802	78.7984	78.7391	6.46195	8	58	5.47832e-06	6.31021	6.38803	5.9969	5.91528	6.55987	6.49982	6.13887	5.38046	5.00397	0.549527	0.697655	-0.0467934	-0.202161	1.02471	0.910425	0.223424	-1.2201	-1.93669	0.0778253	-0.313302	-0.394931	0.249659	0.189613	-0.171332	-0.92975	-1.30624	1.05543	-1.24255	-1.31488	1.18893	1.14046	-1.1261	-1.90495
IL1A	34	0	0.166908	0.166908	0.169525	0	1	0.134778	77.1065	79.1065	79.178	79.186	1.12935	8	58	0.35773	4.81572	4.80253	4.80331	4.65523	4.45425	4.99824	4.67121	4.82605	4.48415	0.528227	0.452783	0.457213	-0.390162	-1.54028	1.57272	-0.298688	0.58735	-1.36917	-0.0131838	-0.0124098	-0.160488	-0.36147	0.182524	-0.144503	0.0103317	-0.331568	-1.00918	-1.00864	-1.11767	-1.28473	1.13487	-1.10535	1.00719
EDNRB	35	0	0.26279	0.26279	0.333801	0	1	0.308162	103.433	105.433	105.505	105.513	3.22933	8	58	0.0041887	4.81572	4.80253	4.80331	4.65523	4.45425	5.43332	5.34677	5.39229	4.77636	-0.35593	-0.39303	-0.390852	-0.80756	-1.37314	1.38209	1.1385	1.2666	-0.466671	-0.0131838	-0.0124098	-0.160488	-0.36147	0.617608	0.531051	0.57657	-0.0393524	-1.00918	-1.00864	-1.11767	-1.28473	1.53433	1.44498	1.4913
TBK1	36	0.0143904	0.137818	0.152208	0.487925	0.0945445	0.905456	0.765511	70.2984	74.2984	74.5165	74.4572	21.5662	8	58	8.97186e-15	6.99766	7.14264	7.31982	7.68932	8.38066	8.49386	8.38389	8.13736	7.92905	-1.46075	-1.20647	-0.895694	-0.247581	0.965022	1.16358	0.970701	0.53828	0.172907	0.144972	0.322151	0.691656	1.38299	1.49619	1.38623	1.1397	0.931387	1.10571	1.25019	1.61514	2.60809	2.82098	2.61395	2.20334
HLA-DMB	37	0.0185814	0.166106	0.184687	0.383251	0.10061	0.89939	0.640977	81.3517	85.3517	85.5699	85.5106	11.2518	8	58	1.88933e-09	5.42356	5.26784	5.27146	5.55029	4.72219	4.4456	4.23783	4.33475	4.36002	1.09362	0.798792	0.805642	1.33358	-0.234318	-0.758008	-1.15139	-0.96788	-0.920037	-0.155718	-0.1521	0.126735	-0.701368	-0.977962	-1.18573	-1.08881	-1.06354	-1.11398	-1.11119	1.09182	-1.62605	-1.96968	-2.27479	-2.12698
IL12B	38	0.040941	0.302789	0.343731	0.661438	0.119108	0.880892	0.62309	116.838	120.838	121.056	120.997	9.57466	8	58	2.46375e-08	4.81572	4.80253	4.80331	4.65523	4.45425	5.69874	5.57996	6.82744	5.47201	-0.563148	-0.580883	-0.579842	-0.779036	-1.0494	0.624689	0.464909	2.14301	0.319694	-0.0131838	-0.0124098	-0.160488	-0.36147	0.883022	0.764243	2.01172	0.656293	-1.00918	-1.00864	-1.11767	-1.28473	1.84423	1.69848	4.03264
TAP1	39	0.00518024	0.331045	0.336225	1.36724	0.0154071	0.984593	0.790121	117.665	121.665	121.883	121.824	26.7595	8	58	8.47829e-17	9.62889	10.1445	10.2615	11.5557	12.3441	12.1632	11.6784	11.2958	11.2578	-1.61875	-1.06923	-0.944529	0.43477	1.27496	1.08224	0.565516	0.157717	0.1173	0.515612	0.632624	1.92683	2.71519	2.53436	2.04951	1.66687	1.62894	1.4296	1.55038	3.80218	6.56678	5.79318	4.13964	3.17524
CD40	40	0.0423643	0.165498	0.207862	0.377339	0.20381	0.79619	0.645932	84.482	88.482	88.7002	88.6409	9.62283	8	58	2.28158e-08	6.12921	5.81174	5.73703	5.47067	4.69313	5.76779	5.3216	5.99661	5.61535	1.20831	0.460992	0.285139	-0.341882	-2.17219	0.357528	-0.692779	0.896175	-0.00129449	-0.31747	-0.392175	-0.658542	-1.43608	-0.361423	-0.807608	-0.132598	-0.513856	-1.24614	-1.31237	-1.57849	-2.70585	-1.28469	-1.75031	-1.09627
HSD11B1	41	0.0026263	0.278849	0.281475	0.652368	0.00933051	0.990669	0.627598	107.391	111.391	111.609	111.55	11.9993	8	58	6.42596e-10	4.81572	4.80253	4.80331	4.65523	4.66434	5.88974	5.83934	6.85128	5.86985	-0.689145	-0.706006	-0.705016	-0.894387	-0.88273	0.684375	0.619928	1.91405	0.658935	-0.0131838	-0.0124098	-0.160488	-0.151374	1.07402	1.02363	2.03556	1.05413	-1.00918	-1.00864	-1.11767	-1.11063	2.10529	2.03303	4.09982
IKBKG	42	0.0388958	0.163774	0.202669	0.246537	0.191917	0.808083	0.462554	83.5252	87.5252	87.7434	87.6841	3.41289	8	58	0.00280085	6.04371	5.9952	6.28369	6.25435	6.70544	6.55473	6.55142	5.9824	5.96547	-0.756532	-0.926493	0.0843932	-0.0184115	1.56229	1.03419	1.02259	-0.971349	-1.03068	-0.0485027	0.23998	0.210642	0.661737	0.511029	0.507718	-0.0613036	-0.0782349	-1.03419	1.18098	1.1572	1.58199	1.42507	1.4218	-1.04341
NOS2	43	0.0296437	0.383194	0.412838	0.598279	0.0718046	0.928195	0.463329	128.725	132.725	132.943	132.883	4.9825	8	58	0.000100349	4.81572	4.80253	4.80331	4.65523	4.45425	5.45695	5.05801	6.53373	5.26735	-0.448351	-0.469583	-0.468337	-0.706809	-1.03048	0.584317	-0.0581502	2.31841	0.27898	-0.0131838	-0.0124098	-0.160488	-0.36147	0.641231	0.242294	1.71801	0.451634	-1.00918	-1.00864	-1.11767	-1.28473	1.55966	1.18287	3.28982
TNFSF18	44	0.00243085	0.080463	0.0828939	0.112987	0.0293249	0.970675	0.389065	36.3253	40.3253	40.5435	40.4842	4.13037	8	58	0.000594506	4.81572	4.80253	4.80331	4.65523	4.45425	4.4456	4.25164	4.38859	4.46174	1.20084	1.13787	1.14157	0.434337	-0.525567	-0.566876	-1.49324	-0.839165	-0.489769	-0.0131838	-0.0124098	-0.160488	-0.36147	-0.370119	-0.564078	-0.42713	-0.353975	-1.00918	-1.00864	-1.11767	-1.28473	-1.29246	-1.47844	-1.34456
AGER	45	0.010447	0.225092	0.235539	0.282093	0.0443535	0.955647	0.321946	96.6938	100.694	100.912	100.853	2.76726	8	58	0.0116067	4.91355	4.80253	4.9637	4.65523	4.45425	5.05431	4.88367	5.66181	5.5039	-0.194822	-0.484915	-0.063778	-0.869831	-1.39501	0.172997	-0.272902	1.76045	1.34781	-0.111016	0.0501493	-0.25832	-0.459302	0.140761	-0.0298805	0.748265	0.590353	-1.07999	1.03537	-1.19609	-1.37488	1.10249	-1.02093	1.67977
IRAK1	46	0.0425578	0.166702	0.209259	0.398171	0.203373	0.796627	0.661991	84.8897	88.8897	89.1079	89.0486	10.8714	8	58	3.32061e-09	5.94488	5.78672	6.20816	6.28134	6.31251	6.97126	6.78489	7.46077	6.95964	-1.05226	-1.33996	-0.573345	-0.440225	-0.383521	0.814749	0.475743	1.70519	0.793621	-0.158161	0.26328	0.336462	0.367635	1.02638	0.840011	1.51589	1.01476	-1.11586	1.2002	1.26266	1.29024	2.0369	1.79006	2.85976
IRAK3	47	0.140672	0.314689	0.455361	1.65176	0.308924	0.691076	0.848398	124.607	128.607	128.825	128.766	34.3965	8	58	2.73841e-19	8.0522	8.34781	8.64992	8.27699	9.74969	10.6594	11.2425	10.4247	10.6245	-1.2212	-0.981562	-0.736657	-1.03897	0.15488	0.892333	1.36504	0.702104	0.864032	0.295614	0.597721	0.224798	1.6975	2.6072	3.19031	2.37253	2.57228	1.22741	1.51332	1.16861	3.24337	6.09318	9.12809	5.1785
TNFRSF18	48	0.00656854	0.0936679	0.100236	0.119101	0.0655305	0.93447	0.339117	46.758	50.758	50.9761	50.9169	2.74576	8	58	0.0121716	4.81572	4.80253	4.80331	4.65523	4.45425	4.52669	4.35095	4.39247	4.45152	1.23335	1.16329	1.1674	0.380492	-0.687557	-0.30259	-1.23648	-1.01584	-0.702068	-0.0131838	-0.0124098	-0.160488	-0.36147	-0.289028	-0.464764	-0.423245	-0.364201	-1.00918	-1.00864	-1.11767	-1.28473	-1.22182	-1.38009	-1.34094
THBS1	49	0.355915	0.469182	0.825096	0.923267	0.431361	0.568639	0.59975	150.821	154.821	155.039	154.98	4.12615	8	58	0.000599882	9.30966	9.10647	9.60882	10.003	10.2763	9.80654	10.5619	10.2776	11.02	-1.12666	-1.45986	-0.636077	0.0103621	0.458507	-0.31184	0.926846	0.460619	1.67811	-0.203189	0.299164	0.693371	0.966655	0.496888	1.25225	0.967942	1.71038	-1.15124	1.23043	1.61706	1.9543	1.41117	2.38213	1.95605
ZNF205	50	0.032212	0.32321	0.355422	0.593259	0.0906303	0.90937	0.54705	119.588	123.588	123.806	123.747	7.0733	8	58	1.76155e-06	4.81572	4.80253	4.80331	4.65523	4.45425	5.54801	5.04025	6.69792	5.51772	-0.483668	-0.502839	-0.501713	-0.717043	-1.0093	0.58121	-0.157155	2.25336	0.537155	-0.0131838	-0.0124098	-0.160488	-0.36147	0.732296	0.224536	1.8822	0.702	-1.00918	-1.00864	-1.11767	-1.28473	1.66128	1.1684	3.68637
SPP1	51	0.000170294	0.0932207	0.093391	0.115869	0.00182345	0.998177	0.294232	43.4265	47.4265	47.6447	47.5854	2.99223	8	58	0.00706135	4.81572	4.80253	4.80331	4.65523	4.68	4.4456	4.25262	4.48717	4.48236	1.08312	1.01608	1.02001	0.26699	0.392964	-0.799048	-1.78042	-0.587628	-0.612075	-0.0131838	-0.0124098	-0.160488	-0.135716	-0.370119	-0.5631	-0.328544	-0.333352	-1.00918	-1.00864	-1.11767	-1.09864	-1.29246	-1.47744	-1.25575
FOXP3	52	0.0362173	0.297231	0.333449	0.517444	0.108614	0.891386	0.525466	115.392	119.392	119.61	119.551	6.23919	8	58	8.36297e-06	4.81572	4.80253	4.80331	4.65523	4.45425	5.54938	4.95724	6.40412	5.69475	-0.495499	-0.516533	-0.515298	-0.751555	-1.07222	0.675055	-0.269707	2.03877	0.906985	-0.0131838	-0.0124098	-0.160488	-0.36147	0.733666	0.141519	1.5884	0.879032	-1.00918	-1.00864	-1.11767	-1.28473	1.66286	1.10307	3.00716
TNFAIP3	53	0	0.541261	0.541261	2.56722	0	1	0.81472	145.341	147.341	147.413	147.421	31.88	8	58	1.60483e-18	6.6709	6.76597	6.71389	7.13661	8.31377	10.4681	10.0649	8.85976	9.24481	-1.05558	-0.991979	-1.02682	-0.74402	0.0434971	1.48475	1.21502	0.408767	0.666364	0.0950733	0.0429912	0.465716	1.64287	3.79722	3.39404	2.18887	2.57392	1.06812	1.03025	1.381	3.12287	13.902	10.5125	4.55948
ICAM4	54	0.273671	0.645829	0.9195	1.43182	0.29763	0.70237	0.640639	166.015	170.015	170.233	170.174	8.48281	8	58	1.48132e-07	5.5613	5.48109	5.36506	5.77498	5.92087	7.21029	6.73346	8.25437	7.32169	-0.826171	-0.904941	-1.01889	-0.616325	-0.473056	0.79323	0.324957	1.81857	0.902627	-0.0802096	-0.196243	0.21368	0.359567	1.64899	1.17216	2.69307	1.76039	-1.05717	-1.14571	1.15964	1.28304	3.13614	2.25349	6.46687
GP1BB	55	0.378714	0.197462	0.576176	0.862888	0.657289	0.342711	0.821696	106.497	110.497	110.715	110.655	18.131	8	58	3.11685e-13	6.31452	6.33354	6.51417	6.51708	6.38841	6.4922	8.26682	8.32021	6.76604	-0.694672	-0.671285	-0.449069	-0.445496	-0.60378	-0.476102	1.70698	1.77265	-0.139227	0.0190113	0.19965	0.202555	0.0738859	0.177675	1.95229	2.00568	0.451519	1.01326	1.14842	1.15073	1.05255	1.13106	3.86989	4.01578
MCL1	56	0.0027449	0.211745	0.21449	0.591875	0.0127973	0.987203	0.68923	91.6092	95.6092	95.8274	95.7681	15.72	8	58	4.98456e-12	11.1799	11.3344	11.791	12.1005	12.8827	12.6751	12.4675	11.6601	11.0785	-1.09866	-0.86546	-0.176268	0.290985	1.47176	1.15827	0.844928	-0.373805	-1.25175	0.15449	0.611057	0.920597	1.70282	1.49515	1.28757	0.480196	-0.101413	1.11303	1.52738	1.8929	3.25537	2.81893	2.44116	1.39493
IL9	57	0	0.0993258	0.0993258	0.123303	0	1	0.292097	47.0025	49.0025	49.0739	49.0819	2.99152	8	58	0.00707241	4.81572	4.80253	4.80331	4.65523	4.45425	4.59696	4.25284	4.39357	4.48415	1.1438	1.07864	1.08247	0.350628	-0.642674	0.0626603	-1.63808	-0.942547	-0.494894	-0.0131838	-0.0124098	-0.160488	-0.36147	-0.218754	-0.562877	-0.422145	-0.331568	-1.00918	-1.00864	-1.11767	-1.28473	-1.16373	-1.47721	-1.33992
IDO2	58	0.135019	0.390456	0.525475	0.901776	0.256946	0.743054	0.653315	135.753	139.753	139.971	139.912	9.27406	8	58	3.99638e-08	5.06097	5.11928	5.5953	4.98192	6.36377	6.72354	5.79345	4.61479	4.4194	-0.447156	-0.37204	0.241246	-0.549001	1.23132	1.69483	0.496537	-1.022	-1.27373	0.0583041	0.534323	-0.0790494	1.30279	1.66257	0.732474	-0.446183	-0.641571	1.04124	1.44826	-1.05632	2.46706	3.16579	1.66149	-1.36243
CXCL6	59	0.0336965	0.459776	0.493472	0.619205	0.0682845	0.931715	0.376838	139.149	143.149	143.367	143.307	3.27968	8	58	0.00375017	4.81572	4.80253	4.80331	4.65523	4.45425	5.68101	5.26715	5.94084	4.66904	-0.382912	-0.40891	-0.407383	-0.699385	-1.09571	1.32339	0.507296	1.83576	-0.672145	-0.0131838	-0.0124098	-0.160488	-0.36147	0.86529	0.451438	1.12512	-0.146674	-1.00918	-1.00864	-1.11767	-1.28473	1.82171	1.3674	2.1812
TRAF3	60	0.0196543	0.207599	0.227253	0.534197	0.0864864	0.913514	0.676383	93.7537	97.7537	97.9719	97.9126	13.461	8	58	8.66266e-11	6.87134	6.68585	6.5183	6.52864	6.60585	7.8937	8.21798	7.5675	7.37166	-0.419044	-0.708272	-0.969517	-0.95339	-0.833008	1.17505	1.68069	0.666426	0.361074	-0.185494	-0.353041	-0.342698	-0.265492	1.02236	1.34664	0.696157	0.500323	-1.13721	-1.27725	-1.26813	-1.20205	2.03124	2.5432	1.62018
CR2	61	0.114162	0.297561	0.411723	0.584651	0.277278	0.722722	0.593547	120.537	124.537	124.756	124.696	6.7147	8	58	3.41128e-06	5.74641	5.51245	5.5262	5.33294	4.67431	4.67474	4.36331	4.8883	4.36156	1.39247	0.950735	0.976685	0.611805	-0.631779	-0.630954	-1.21896	-0.227725	-1.22227	-0.233954	-0.22021	-0.413462	-1.0721	-1.07166	-1.38309	-0.858102	-1.38484	-1.17605	-1.1649	-1.33188	-2.10249	-2.10186	-2.60827	-1.81265
SHC1	62	0.0423751	0.0734337	0.115809	0.420141	0.365906	0.634094	0.861666	41.6415	45.6415	45.8597	45.8004	35.2449	8	58	1.54442e-19	6.72242	6.85832	6.81923	7.183	7.59477	7.85958	8.1386	8.36882	8.05205	-1.24941	-1.03402	-1.09597	-0.51944	0.13315	0.552841	0.995057	1.35991	0.857882	0.1359	0.0968134	0.460587	0.872351	1.13716	1.41619	1.6464	1.32964	1.09878	1.06941	1.3761	1.83064	2.19948	2.66879	3.13051
CCL8	63	0.118264	0.615702	0.733967	1.77523	0.161131	0.838869	0.717594	159.393	163.393	163.611	163.551	14.8553	8	58	1.44001e-11	4.81572	4.80253	4.80331	5.44321	6.33811	7.59484	6.78158	7.08934	6.93466	-1.12673	-1.1386	-1.1379	-0.561713	0.244089	1.37568	0.643402	0.92052	0.78124	-0.0131838	-0.0124098	0.627491	1.5224	2.77912	1.96586	2.27362	2.11894	-1.00918	-1.00864	1.54488	2.87268	6.86433	3.90646	4.83537
C6	64	0	0.148949	0.148949	0.16062	0	1	0.185064	70.5041	72.5041	72.5755	72.5835	1.64641	8	58	0.131648	4.81572	4.80253	4.80331	4.65523	4.45425	4.85619	4.42048	4.39357	4.48415	0.953332	0.885026	0.889037	0.121835	-0.919463	1.16303	-1.09443	-1.23382	-0.764542	-0.0131838	-0.0124098	-0.160488	-0.36147	0.0404731	-0.39524	-0.422145	-0.331568	-1.00918	-1.00864	-1.11767	-1.28473	1.02845	-1.31516	-1.33992
CD80	65	0.149893	0.481444	0.631336	0.883035	0.237421	0.762579	0.56225	147.369	151.369	151.587	151.528	5.43026	8	58	4.06106e-05	5.8971	5.8013	5.56651	6.03779	6.2756	7.44477	6.7737	5.94374	5.79062	-0.462503	-0.624784	-1.02252	-0.224174	0.178673	2.15923	1.02245	-0.383495	-0.642877	-0.0957984	-0.330589	0.140691	0.378502	1.54767	0.876603	0.0466405	-0.106479	-1.06866	-1.25753	1.10243	1.29999	2.92345	1.83605	1.03286
IKZF3	66	0.0833495	0.20321	0.28656	0.424252	0.290863	0.709137	0.618095	98.7738	102.774	102.992	102.933	7.66276	8	58	6.1122e-07	7.76675	7.69461	7.29832	7.14159	6.55564	6.96606	6.91004	7.27692	6.053	1.2896	1.15537	0.418019	0.126393	-0.963844	-0.200204	-0.304439	0.378201	-1.89909	-0.0721441	-0.468429	-0.625162	-1.21111	-0.800691	-0.856712	-0.489829	-1.71375	-1.05128	-1.3836	-1.54238	-2.31515	-1.74194	-1.81091	-1.40428
IL7	67	0.0142734	0.209337	0.22361	0.44942	0.0638317	0.936168	0.60826	93.3303	97.3303	97.5485	97.4892	10.1377	8	58	1.01563e-08	6.03326	6.36572	5.88143	6.10614	4.8962	5.40293	5.02656	5.15165	5.06634	0.880165	1.48293	0.604874	1.01229	-1.18139	-0.262664	-0.945037	-0.718255	-0.872914	0.332458	-0.151838	0.0728741	-1.13706	-0.630333	-1.0067	-0.881617	-0.966921	1.25916	-1.11098	1.05181	-2.19932	-1.54792	-2.00931	-1.84244
OASL	68	0	0.604051	0.604051	7.24927	0	1	0.926774	151.707	153.707	153.779	153.787	91.759	8	58	4.7324e-30	5.18734	6.04187	6.36531	10.2851	11.1805	11.0572	10.857	10.3267	10.1472	-1.58732	-1.23613	-1.10322	0.507655	0.875623	0.824945	0.742685	0.524767	0.450989	0.854539	1.17798	5.09775	5.99314	5.86982	5.66966	5.13939	4.95987	1.80818	2.26259	34.2434	63.6964	58.4781	50.9023	35.2461
IRF4	69	0.0358323	0.131639	0.167471	0.385779	0.213961	0.786039	0.725014	71.499	75.499	75.7172	75.6579	15.4489	8	58	6.92407e-12	7.1607	7.06889	6.96133	6.97602	6.54868	5.90704	5.7908	6.31667	6.39841	1.16536	0.984288	0.772151	0.801111	-0.0417256	-1.30724	-1.5365	-0.499327	-0.33811	-0.091807	-0.199365	-0.184682	-0.612015	-1.25366	-1.3699	-0.844028	-0.762288	-1.0657	-1.14819	-1.13657	-1.52839	-2.38445	-2.58452	-1.79505
PTGER1	70	0.00243085	0.080463	0.0828939	0.112987	0.0293249	0.970675	0.389065	36.3253	40.3253	40.5435	40.4842	4.13037	8	58	0.000594506	4.81572	4.80253	4.80331	4.65523	4.45425	4.4456	4.25164	4.38859	4.46174	1.20084	1.13787	1.14157	0.434337	-0.525567	-0.566876	-1.49324	-0.839165	-0.489769	-0.0131838	-0.0124098	-0.160488	-0.36147	-0.370119	-0.564078	-0.42713	-0.353975	-1.00918	-1.00864	-1.11767	-1.28473	-1.29246	-1.47844	-1.34456
C3AR1	71	0.0575229	1.17546	1.23299	4.63988	0.0466533	0.953347	0.785008	192.666	196.666	196.884	196.825	25.0627	8	58	3.58958e-16	6.50118	6.33017	6.81027	7.38455	8.74914	11.0422	11.3462	9.60065	11.1206	-1.08424	-1.16614	-0.936204	-0.661154	-0.00759751	1.09066	1.23626	0.400224	1.12819	-0.171018	0.309083	0.88337	2.24796	4.54105	4.84506	3.09946	4.61941	-1.12585	1.23892	1.84468	4.7501	23.2805	28.7415	8.571
PIGR	72	0.00243085	0.080463	0.0828939	0.112987	0.0293249	0.970675	0.389065	36.3253	40.3253	40.5435	40.4842	4.13037	8	58	0.000594506	4.81572	4.80253	4.80331	4.65523	4.45425	4.4456	4.25164	4.38859	4.46174	1.20084	1.13787	1.14157	0.434337	-0.525567	-0.566876	-1.49324	-0.839165	-0.489769	-0.0131838	-0.0124098	-0.160488	-0.36147	-0.370119	-0.564078	-0.42713	-0.353975	-1.00918	-1.00864	-1.11767	-1.28473	-1.29246	-1.47844	-1.34456
CUL9	73	0.0655044	0.258721	0.324225	0.362067	0.202034	0.797966	0.422961	110.344	114.344	114.562	114.503	2.52193	8	58	0.0199537	5.52353	5.61057	5.47546	5.42565	5.05399	5.99382	5.59606	6.16352	5.73729	-0.298037	-0.0291116	-0.446566	-0.600503	-1.74887	1.15511	-0.0739471	1.67947	0.362456	0.0870337	-0.048069	-0.0978884	-0.469541	0.470291	0.0725233	0.639989	0.213758	1.06218	-1.03388	-1.07021	-1.38467	1.38539	1.05155	1.55832
ARG1	74	0.0107134	0.0934107	0.104124	0.119804	0.10289	0.89711	0.35464	48.0494	52.0494	52.2676	52.2083	2.52902	8	58	0.019644	4.81572	4.80253	4.80331	4.65523	4.45425	4.4456	4.41337	4.51334	4.44708	1.27072	1.19499	1.19943	0.348874	-0.805564	-0.855245	-1.04035	-0.466122	-0.846733	-0.0131838	-0.0124098	-0.160488	-0.36147	-0.370119	-0.402345	-0.302375	-0.368637	-1.00918	-1.00864	-1.11767	-1.28473	-1.29246	-1.32165	-1.23317
CASP3	75	0.199622	0.139587	0.339208	0.418284	0.588492	0.411508	0.739306	84.4678	88.4678	88.686	88.6267	6.3248	8	58	7.10389e-06	8.97672	9.37467	9.46661	9.16785	9.22934	8.57399	8.69852	8.35163	8.6762	0.0785348	1.10137	1.33769	0.569783	0.727826	-0.956621	-0.63653	-1.52814	-0.693907	0.397942	0.489887	0.191125	0.252613	-0.402737	-0.278203	-0.625093	-0.300526	1.31763	1.40434	1.14165	1.19136	-1.32201	-1.21268	-1.54231
FAS	76	0.00197913	0.437391	0.43937	2.00935	0.00450448	0.995496	0.809528	133.236	137.236	137.454	137.395	30.6289	8	58	4.02971e-18	7.62495	8.10809	7.77747	9.51482	10.3776	10.9339	10.3284	9.42703	9.35502	-1.37419	-0.971073	-1.24693	0.202679	0.922527	1.38675	0.881473	0.12943	0.0693393	0.483137	0.15252	1.88987	2.75261	3.30898	2.70341	1.80209	1.73007	1.39778	1.11151	3.70603	6.73935	9.91066	6.51338	3.48724
TAP2	77	0.0823506	0.173464	0.255815	1.29426	0.321915	0.678085	0.893493	90.3932	94.3932	94.6114	94.5521	52.2583	8	58	1.04545e-23	5.53836	5.931	5.96944	7.09307	7.71865	7.99803	7.87414	8.36397	7.89114	-1.51648	-1.14773	-1.11163	-0.0563653	0.531152	0.793534	0.677181	1.13721	0.693141	0.392639	0.431078	1.55471	2.18029	2.45967	2.33578	2.82561	2.35277	1.31279	1.34824	2.93775	4.53244	5.5009	5.04823	7.08912
MAPK14	78	0.0660051	0.395094	0.461099	1.22625	0.143147	0.856853	0.736502	133.083	137.083	137.302	137.242	17.454	8	58	6.61529e-13	7.42437	7.74279	8.08616	8.07923	9.82082	9.70566	9.31162	8.48811	7.97066	-1.23677	-0.875474	-0.48587	-0.493741	1.48233	1.35167	0.904582	-0.029807	-0.616928	0.318424	0.661797	0.654861	2.39645	2.2813	1.88726	1.06374	0.546291	1.24697	1.58205	1.57446	5.26507	4.86114	3.69931	2.09035
AKT3	79	0.0568832	0.122397	0.17928	0.447387	0.317287	0.682713	0.78249	70.0505	74.0505	74.2687	74.2094	19.01	8	58	1.20626e-13	9.68061	9.57459	9.25228	9.37299	9.11745	8.76285	8.43798	7.82517	7.77902	1.13736	0.989159	0.538594	0.70734	0.35011	-0.145579	-0.599726	-1.45637	-1.52089	-0.106017	-0.428331	-0.307617	-0.563163	-0.917756	-1.24263	-1.85544	-1.90159	-1.07625	-1.34568	-1.23766	-1.47751	-1.88917	-2.3663	-3.61861
PSMB9	80	0.0269679	0.247052	0.27402	1.00581	0.0984159	0.901584	0.796375	104.295	108.295	108.513	108.454	25.7156	8	58	2.0427e-16	9.2278	9.5804	9.81075	10.7208	11.6443	11.2266	11.0601	10.5474	10.2828	-1.52727	-1.08868	-0.802159	0.329798	1.47851	0.958927	0.7518	0.114108	-0.215031	0.352605	0.582958	1.493	2.41652	1.9988	1.83228	1.3196	1.05499	1.27686	1.49792	2.81475	5.33882	3.99667	3.56099	2.49597
C3	81	0.0272945	0.439863	0.467157	1.05908	0.0584268	0.941573	0.649768	136.168	140.168	140.387	140.327	12.3246	8	58	4.06613e-10	4.81572	4.80253	4.84487	4.65523	4.75851	6.33047	6.6975	6.84729	6.38915	-0.789249	-0.803021	-0.758798	-0.956898	-0.84901	0.793093	1.17651	1.33298	0.854392	-0.0131838	0.0291506	-0.160488	-0.0572086	1.51475	1.88179	2.03158	1.57343	-1.00918	1.02041	-1.11767	-1.04045	2.85749	3.68531	4.08852
CXCL12	82	0.0459618	0.195325	0.241286	0.269718	0.190486	0.809514	0.413945	93.701	97.701	97.9192	97.8599	2.33882	8	58	0.0298561	4.93618	4.85682	4.92506	4.85107	4.57654	5.18338	5.49528	5.13946	4.66753	-0.0817419	-0.365558	-0.121505	-0.38613	-1.3679	0.802305	1.91777	0.645254	-1.0425	-0.0793606	-0.0111184	-0.0851127	-0.359634	0.247197	0.559102	0.203282	-0.268645	-1.05655	-1.00774	-1.06077	-1.2831	1.1869	1.47335	1.15131
SMAD5	83	0.0144573	0.315116	0.329573	0.401156	0.0438669	0.956133	0.332307	116.185	120.185	120.403	120.344	2.81985	8	58	0.010333	5.24278	5.25897	5.14728	4.8009	4.67718	5.12071	5.25055	6.09928	5.89178	-0.0737129	-0.0384287	-0.281871	-1.03684	-1.30649	-0.339778	-0.0567958	1.79309	1.34083	0.0161884	-0.0955035	-0.441885	-0.565602	-0.122071	0.00776161	0.856493	0.648994	1.01128	-1.06844	-1.35838	-1.48	-1.0883	1.00539	1.81063
MAP3K7	84	0	0.188404	0.188404	0.183278	0	1	0.096633	84.133	86.133	86.2045	86.2125	0.775531	8	58	0.625684	5.60484	5.70247	5.62473	5.64545	5.37692	5.58275	5.61305	5.17343	5.56224	0.375854	0.968025	0.496483	0.622167	-1.0066	0.241846	0.425624	-2.24085	0.117447	0.0976306	0.0198881	0.0406094	-0.227924	-0.0220936	0.00820562	-0.431412	-0.0426032	1.07001	1.01388	1.02855	-1.17115	-1.01543	1.0057	-1.34855
C1QB	85	0.0269047	0.362133	0.389037	0.610954	0.0691572	0.930843	0.502752	125.338	129.338	129.556	129.497	6.23044	8	58	8.50408e-06	5.00755	4.88915	4.86828	4.8992	5.57598	6.23991	5.46191	6.34525	6.03052	-0.781246	-0.977135	-1.01167	-0.96051	0.159213	1.25767	-0.0295243	1.43195	0.911243	-0.118398	-0.13927	-0.10835	0.568429	1.23236	0.454353	1.33769	1.02297	-1.08553	-1.10135	-1.07799	1.48291	2.3495	1.37017	2.52747
ITGAX	86	0.334012	0.408115	0.742127	0.744532	0.450074	0.549926	0.568783	143.192	147.192	147.411	147.351	2.09089	8	58	0.0512873	5.91199	6.00792	5.87536	6.30304	6.24274	6.76886	6.09662	6.73804	6.97475	-1.01426	-0.7783	-1.10434	-0.0524469	-0.200778	1.09323	-0.560153	1.01742	1.59963	0.0959372	-0.0366274	0.391057	0.330748	0.856869	0.184632	0.826049	1.06277	1.06876	-1.02571	1.31135	1.25767	1.8111	1.13653	1.77282
GFI1	87	0.0805895	0.540445	0.621035	1.20966	0.129767	0.870233	0.633301	150.807	154.807	155.025	154.966	10.0419	8	58	1.17882e-08	4.87691	5.03405	4.87845	4.65523	4.50342	6.16543	6.00104	7.65941	5.80446	-0.626058	-0.470346	-0.624537	-0.84573	-0.996154	0.65075	0.487855	2.13116	0.293061	0.15714	0.00153467	-0.221686	-0.37349	1.28852	1.12413	2.7825	0.927547	1.11507	1.00106	-1.1661	-1.29548	2.44277	2.1797	6.88044
C2	88	0.100528	0.30104	0.401569	0.850072	0.250339	0.749661	0.716194	120.49	124.49	124.708	124.649	13.4463	8	58	8.83368e-11	4.81933	4.86604	4.96503	5.45685	5.88625	6.144	6.32454	6.9615	7.38608	-1.13108	-1.08068	-0.973888	-0.443287	0.0199736	0.298051	0.49283	1.18001	1.63807	0.0467124	0.145702	0.637522	1.06692	1.32468	1.50522	2.14217	2.56676	1.03291	1.10627	1.55565	2.09496	2.50477	2.83868	4.41426
IL22RA2	89	0.000991389	0.312852	0.313843	0.334005	0.00315886	0.996841	0.179366	113.726	117.726	117.944	117.884	1.53456	8	58	0.165362	4.81572	4.80253	4.80331	4.65523	4.68055	5.32837	5.0193	5.39949	4.48277	-0.233744	-0.276691	-0.274169	-0.756535	-0.674059	1.43622	0.429419	1.66789	-1.31832	-0.0131838	-0.0124098	-0.160488	-0.135169	0.51265	0.20358	0.583769	-0.332947	-1.00918	-1.00864	-1.11767	-1.09822	1.42667	1.15155	1.49876
IL16	90	0.0224529	0.119188	0.141641	0.378674	0.15852	0.84148	0.743561	64.0704	68.0704	68.2886	68.2293	17.0331	8	58	1.06663e-12	8.51838	8.61177	8.8756	8.29063	8.16429	7.53706	7.72491	7.25308	6.9623	0.800393	0.942708	1.34473	0.453353	0.26084	-0.694934	-0.408682	-1.12766	-1.57075	0.0933949	0.357223	-0.227748	-0.354086	-0.981319	-0.793464	-1.2653	-1.55608	1.06688	1.28096	-1.17101	-1.27818	-1.97427	-1.73323	-2.40377
CXCL10	91	0.270381	1.02943	1.29981	10.1589	0.208016	0.791984	0.918257	190.617	194.617	194.835	194.775	73.4648	8	58	1.68003e-27	4.94383	5.73448	5.46268	9.38031	10.1607	11.8072	11.7901	12.9482	13.3077	-1.3699	-1.13238	-1.21404	-0.0371315	0.197295	0.691948	0.686798	1.0347	1.14271	0.790645	0.518848	4.43648	5.21683	6.86341	6.84627	8.00436	8.36389	1.72985	1.43281	21.6528	37.1896	116.437	115.062	256.775
CD83	92	0	0.329756	0.329756	0.676328	0	1	0.571531	116.599	118.599	118.671	118.679	9.67071	8	58	2.11424e-08	5.92819	5.87809	5.73085	5.64096	5.58461	7.23374	6.99101	7.19133	6.50335	-0.538624	-0.611593	-0.826034	-0.956958	-1.03903	1.36283	1.0093	1.30105	0.299051	-0.050101	-0.197338	-0.287231	-0.34358	1.30555	1.06282	1.26314	0.575154	-1.03534	-1.14658	-1.2203	-1.2689	2.47178	2.08901	2.40017
HAMP	93	0.0222857	0.139127	0.161412	0.160561	0.138067	0.861933	0.290412	72.3789	76.3789	76.5971	76.5378	1.10476	8	58	0.373497	4.81572	4.80253	4.80331	4.65523	4.45425	4.63511	4.491	4.617	4.46538	1.21426	1.12432	1.1296	0.119412	-1.25168	-0.0178285	-1.00097	-0.141403	-1.17571	-0.0131838	-0.0124098	-0.160488	-0.36147	-0.180605	-0.324719	-0.19872	-0.350333	-1.00918	-1.00864	-1.11767	-1.28473	-1.13336	-1.25242	-1.14768
RELB	94	0.0302602	0.276384	0.306645	1.49651	0.0986818	0.901318	0.846908	110.812	114.812	115.031	114.971	37.2228	8	58	4.2382e-20	5.61125	5.67515	5.57779	5.8794	6.73407	8.13187	8.53444	7.83568	7.83396	-1.03032	-0.977936	-1.05775	-0.810512	-0.109933	1.03586	1.36585	0.793072	0.791661	0.0639025	-0.0334633	0.26815	1.12282	2.52062	2.92319	2.22443	2.22271	1.04529	-1.02347	1.20426	2.17772	5.73829	7.5852	4.67327
CCL3	95	0.424243	1.12124	1.54548	5.99661	0.274505	0.725495	0.850629	197.405	201.405	201.623	201.564	35.3866	8	58	1.40502e-19	6.64071	5.32385	6.89893	8.26767	9.16015	11.8784	11.4811	10.5978	9.22265	-0.969016	-1.55184	-0.854727	-0.248939	0.146061	1.34911	1.17326	0.782368	0.173722	-1.31686	0.258228	1.62697	2.51944	5.23766	4.84034	3.95714	2.58194	-2.49123	1.19601	3.08863	5.73361	37.7304	28.6477	15.5316
HLA-A	96	1.45861	0.18301	1.64162	1.88329	0.888518	0.111482	0.924752	111.729	115.729	115.947	115.888	21.3814	8	58	1.07453e-14	11.4489	11.6005	11.948	12.1034	13.0215	13.0743	13.2817	12.622	12.3578	-1.41346	-1.18438	-0.659163	-0.424322	0.963018	1.0428	1.35619	0.359338	-0.0400142	0.151593	0.499156	0.654561	1.57263	1.62542	1.83281	1.17315	0.908875	1.1108	1.41339	1.57414	2.97446	3.08533	3.5623	2.25503
ICOS	97	0.0869877	0.115581	0.202568	0.376051	0.429424	0.570576	0.75789	69.5141	73.5141	73.7323	73.673	15.315	8	58	8.15458e-12	6.86758	6.81762	6.64441	6.70566	6.54034	6.19356	5.48259	5.52066	5.69345	1.04533	0.957343	0.652313	0.760184	0.469061	-0.141634	-1.39365	-1.32661	-1.02232	-0.0499614	-0.223175	-0.16192	-0.327237	-0.674025	-1.38499	-1.34692	-1.17413	-1.03524	-1.1673	-1.11878	-1.25461	-1.59552	-2.61171	-2.54369
MAPKAPK5	98	0.0313573	0.0892763	0.120634	0.128017	0.259938	0.740062	0.441846	50.25	54.25	54.4681	54.4088	2.15285	8	58	0.0448317	6.82383	6.83523	6.42289	6.62813	6.51939	6.76889	6.7097	6.79221	6.2849	0.928065	0.986533	-1.12735	-0.0751724	-0.632637	0.646419	0.342973	0.765962	-1.83479	0.0114048	-0.400933	-0.195693	-0.304433	-0.0549384	-0.114129	-0.03162	-0.538927	1.00794	-1.32036	-1.14527	-1.23493	-1.03881	-1.08232	-1.02216
PSMB10	99	0.0166159	0.146404	0.16302	0.391106	0.101926	0.898074	0.69006	74.0771	78.0771	78.2953	78.236	13.8755	8	58	5.02389e-11	6.86654	7.02415	7.09066	7.85713	8.16679	7.85771	7.87715	7.80039	7.62534	-1.53724	-1.19477	-1.05024	0.615255	1.28815	0.616515	0.658768	0.491972	0.111585	0.157604	0.224119	0.990583	1.30025	0.991163	1.01061	0.933848	0.758792	1.11543	1.16806	1.98699	2.46272	1.98779	2.01476	1.91036
NCF4	100	0.158937	0.236589	0.395526	0.881435	0.401838	0.598162	0.788156	110.385	114.385	114.604	114.544	19.666	8	58	6.0561e-14	7.40616	7.42139	8.19319	7.93161	9.03777	9.1618	9.32969	8.82098	8.3749	-1.3776	-1.35666	-0.29604	-0.655501	0.864607	1.03506	1.26578	0.566691	-0.0463306	0.0152346	0.787031	0.525457	1.63161	1.75565	1.92354	1.41482	0.96874	1.01062	1.72552	1.43939	3.09859	3.37678	3.79352	2.66627
CD164	101	0.00363465	0.251852	0.255487	0.906117	0.0142264	0.985774	0.758841	101.745	105.745	105.963	105.904	22.3527	8	58	4.21517e-15	9.2614	9.43995	9.57891	10.3336	11.0405	11.4759	11.0447	10.4353	10.1406	-1.3386	-1.10971	-0.931589	0.0358483	0.941949	1.50013	0.947349	0.166258	-0.211631	0.178555	0.31751	1.07221	1.77907	2.2145	1.78328	1.17395	0.879154	1.13175	1.24618	2.10266	3.43204	4.64122	3.44208	2.25628
CD55	102	0.0756991	0.377948	0.453647	1.34783	0.166868	0.833132	0.771969	131.268	135.268	135.486	135.427	21.0236	8	58	1.52852e-14	9.50922	9.49015	9.58049	9.92908	11.3256	11.8088	11.7314	11.2742	11.5928	-1.14623	-1.16469	-1.07725	-0.739873	0.611766	1.07944	1.00446	0.56199	0.870388	-0.0190777	0.0712693	0.419856	1.81641	2.29962	2.22215	1.76498	2.08362	-1.01331	1.05064	1.33779	3.52203	4.92327	4.66587	3.39868
TRADD	103	0.0231989	0.23358	0.256779	0.2756	0.0903458	0.909654	0.295284	100.74	104.74	104.959	104.899	1.71497	8	58	0.114219	6.03302	6.13065	5.97668	6.26494	6.41769	6.42144	6.60401	6.53417	5.74968	-0.7161	-0.373212	-0.913947	0.0983898	0.634866	0.648027	1.2892	1.04394	-1.71117	0.0976341	-0.0563349	0.231918	0.384674	0.388421	0.570988	0.501155	-0.283335	1.07002	-1.03982	1.1744	1.30556	1.30896	1.48554	1.41535
IGF2R	104	0.0823838	0.274687	0.357071	0.444804	0.230721	0.769279	0.503674	114.636	118.636	118.854	118.795	3.66091	8	58	0.00163156	9.783	10.0055	10.6349	10.2993	10.7561	10.4482	10.3075	9.98493	9.72286	-1.18635	-0.576425	1.14871	0.228754	1.48093	0.63711	0.251292	-0.632821	-1.3512	0.222512	0.851871	0.516255	0.973071	0.66523	0.524477	0.201938	-0.0601406	1.16676	1.80484	1.43024	1.96301	1.58582	1.43841	1.15024
IL23A	105	0.0482845	0.476358	0.524643	0.957545	0.092033	0.907967	0.586621	142.138	146.138	146.356	146.297	8.6392	8	58	1.13841e-07	4.86384	4.80253	4.80331	4.65523	4.45425	6.06199	5.27524	7.23988	5.76483	-0.5163	-0.585002	-0.584135	-0.750075	-0.9753	0.826375	-0.0552785	2.14635	0.493369	-0.0613068	-0.0605328	-0.208611	-0.409593	1.19815	0.411397	2.37604	0.900987	-1.04341	-1.04285	-1.15558	-1.32831	2.29445	1.32997	5.19109
PTPRC	106	0.00506456	0.125024	0.130088	0.220353	0.0389318	0.961068	0.516293	62.3413	66.3413	66.5595	66.5002	6.97057	8	58	2.1259e-06	12.4059	12.4488	12.5856	12.5676	13.2228	13.0725	13.005	12.2621	12.1596	-0.613258	-0.499154	-0.135719	-0.183546	1.5576	1.15819	0.978694	-0.995167	-1.26764	0.0429417	0.179716	0.161717	0.816974	0.666662	0.59911	-0.143726	-0.24627	1.03021	1.13266	1.11862	1.76171	1.5874	1.51478	-1.10475
LILRB1	107	0.389941	0.270937	0.660878	1.08535	0.590034	0.409966	0.805002	122.974	126.974	127.193	127.133	17.7575	8	58	4.7099e-13	7.66467	7.7095	7.64289	8.00158	8.27692	7.13432	6.09246	5.62837	4.84265	0.558166	0.595773	0.539897	0.840778	1.07175	0.113294	-0.760658	-1.14995	-1.80904	0.0448325	-0.0217788	0.33691	0.612256	-0.530344	-1.57221	-2.03629	-2.82202	1.03156	-1.01521	1.26305	1.52865	-1.44427	-2.97359	-4.1019
CSF1	108	0.028276	0.260752	0.289028	1.00999	0.0978313	0.902169	0.785928	107.404	111.404	111.622	111.563	23.9227	8	58	9.8662e-16	5.2988	5.67711	5.434	7.06793	7.40641	7.19159	6.93172	6.92942	6.54123	-1.47963	-1.01269	-1.31275	0.703972	1.12175	0.856608	0.535855	0.53301	0.0538771	0.37831	0.135209	1.76913	2.10761	1.8928	1.63293	1.63062	1.24243	1.29982	1.09825	3.40849	4.30978	3.71354	3.10141	3.09646
CCL17	109	0	0.209372	0.209372	0.239162	0	1	0.230672	90.2535	92.2535	92.3249	92.3329	2.17381	8	58	0.042832	4.81572	4.80253	4.80331	4.75638	5.12387	5.33565	4.73324	4.39357	4.48415	0.0359021	-0.00988966	-0.00720116	-0.170184	1.10622	1.84182	-0.25057	-1.43035	-1.11575	-0.0131838	-0.0124098	-0.0593338	0.308153	0.519937	-0.0824775	-0.422145	-0.331568	-1.00918	-1.00864	-1.04198	1.23812	1.43389	-1.05883	-1.33992
SELL	110	0.0338606	0.56475	0.598611	1.56021	0.0565653	0.943435	0.694472	150.584	154.584	154.802	154.743	15.2198	8	58	9.16552e-12	12.1798	12.5222	12.8165	13.4847	14.6806	14.7837	14.4861	12.9374	13.327	-1.32953	-0.976341	-0.672789	0.0165529	1.25017	1.35651	1.04953	-0.548005	-0.14609	0.342382	0.636646	1.30489	2.50076	2.60385	2.30626	0.757612	1.14723	1.26785	1.55471	2.47066	5.65984	6.07906	4.946	1.69069
HLA-DOB	111	0.00892049	0.149686	0.158606	0.19074	0.056243	0.943757	0.33749	73.5554	77.5554	77.7736	77.7143	2.77561	8	58	0.0113944	6.93349	6.80218	6.63465	6.3492	6.43903	6.63139	6.61577	6.80486	5.8132	1.12604	0.73206	0.229393	-0.627075	-0.357563	0.219618	0.17273	0.740101	-2.23531	-0.131309	-0.298841	-0.584289	-0.494465	-0.302099	-0.317726	-0.12863	-1.12029	-1.09529	-1.23016	-1.4993	-1.4088	-1.23294	-1.24636	-1.09325
CD7	112	0.0981878	0.0559892	0.154177	0.341551	0.636851	0.363149	0.872182	32.8072	36.8072	37.0254	36.9661	30.4488	8	58	4.612e-18	8.61147	8.46922	8.30764	8.15697	8.16435	7.61991	7.4124	7.2588	7.03784	1.25935	1.00995	0.726663	0.462495	0.475444	-0.47911	-0.842931	-1.11223	-1.49964	-0.14225	-0.303828	-0.4545	-0.447115	-0.99156	-1.19907	-1.35267	-1.57363	-1.10362	-1.23442	-1.37031	-1.36331	-1.98833	-2.29592	-2.55384
C1R	113	0	0.0983956	0.0983956	0.104633	0	1	0.1736	46.4567	48.4567	48.5281	48.5361	1.523	8	58	0.169256	4.81572	4.80253	4.80331	4.65523	4.64712	4.56882	5.00579	4.51994	4.48415	0.682073	0.604168	0.608742	-0.266276	-0.314183	-0.776891	1.80528	-1.06569	-1.27722	-0.0131838	-0.0124098	-0.160488	-0.168595	-0.246899	0.190078	-0.295772	-0.331568	-1.00918	-1.00864	-1.11767	-1.12396	-1.18665	1.14083	-1.22754
PLA2G4A	114	0.0449851	0.124829	0.169814	0.53363	0.264908	0.735092	0.812898	69.8255	73.8255	74.0437	73.9844	26.8425	8	58	7.91515e-17	5.26296	5.52943	5.65963	5.82588	6.46907	6.74358	6.78353	7.15439	6.79299	-1.4446	-1.05334	-0.862168	-0.618071	0.32631	0.729364	0.788033	1.33256	0.801919	0.266475	0.396678	0.562925	1.20611	1.48062	1.52058	1.89144	1.53003	1.20287	1.31647	1.47726	2.30715	2.79068	2.86906	3.71005
CD44	115	0.0400597	0.332541	0.372601	0.678942	0.107514	0.892486	0.595234	121.863	125.863	126.081	126.022	8.82428	8	58	8.35971e-08	11.0495	11.0816	10.9768	11.2609	11.9389	12.534	12.4395	11.0393	11.6214	-0.807955	-0.756093	-0.925596	-0.466033	0.630365	1.59283	1.44007	-0.824443	0.11686	0.0320678	-0.07274	0.211418	0.889345	1.48446	1.39	-0.0101946	0.571833	1.02248	-1.05171	1.15783	1.85233	2.79812	2.62079	-1.00709
BCL2	116	0.0868357	0.17228	0.259116	0.561066	0.335124	0.664876	0.756303	90.3303	94.3303	94.5485	94.4892	16.3037	8	58	2.48713e-12	8.03862	7.85196	7.58224	7.43673	6.61608	6.72152	6.52545	7.00316	6.54981	1.50881	1.19285	0.736278	0.489964	-0.899209	-0.720724	-1.05262	-0.243969	-1.01138	-0.186652	-0.456372	-0.601882	-1.42254	-1.3171	-1.51316	-1.03545	-1.4888	-1.13812	-1.37209	-1.5177	-2.68057	-2.49164	-2.85435	-2.04976
USP9Y	117	0.00917874	0.0607813	0.06996	0.0900002	0.1312	0.8688	0.445922	24.119	28.119	28.3372	28.2779	3.39442	8	58	0.00291636	8.99741	9.11644	9.05547	9.12688	9.14813	8.97386	8.81199	8.48974	8.89421	0.193795	0.766352	0.473061	0.816556	0.918818	0.0805048	-0.698148	-2.24831	-0.302629	0.119025	0.0580549	0.129462	0.150721	-0.0235513	-0.185421	-0.507675	-0.103199	1.086	1.04106	1.09389	1.11012	-1.01646	-1.13715	-1.42176
CMKLR1	118	0.0154942	0.39464	0.410134	0.612699	0.0377785	0.962221	0.45049	128.957	132.957	133.175	133.116	5.24746	8	58	5.86027e-05	4.94842	5.07845	5.09453	5.43483	5.73142	6.26983	5.50215	6.46438	6.06228	-1.22438	-0.987574	-0.958283	-0.33851	0.201651	1.18223	-0.215908	1.53655	0.804231	0.130024	0.146107	0.48641	0.783	1.32141	0.553728	1.51596	1.11386	1.09431	1.10658	1.40095	1.72071	2.4991	1.46787	2.85989
GZMB	119	0.479688	0.207161	0.686849	0.972559	0.698389	0.301611	0.834255	110.523	114.523	114.741	114.682	18.4962	8	58	2.09337e-13	10.9135	11.0004	10.5462	10.541	10.051	9.56997	8.97582	9.12612	10.1946	1.09782	1.2154	0.600877	0.593882	-0.0691169	-0.719897	-1.52372	-1.32039	0.125147	0.086907	-0.367316	-0.372485	-0.862541	-1.34356	-1.93771	-1.78741	-0.71895	1.06209	-1.28995	-1.29458	-1.81824	-2.53777	-3.83098	-3.45196
KEAP1	120	0.00352524	0.271472	0.274997	0.390412	0.0128192	0.987181	0.395983	106.022	110.022	110.24	110.181	4.54329	8	58	0.000248763	4.83819	4.87486	4.87164	4.91575	4.72721	5.3316	5.27318	6.34427	5.36915	-0.66677	-0.593467	-0.599899	-0.511742	-0.888604	0.319496	0.20272	2.34371	0.394553	0.0366717	0.0334542	0.0775573	-0.110979	0.493407	0.434987	1.50608	0.530956	1.02574	1.02346	1.05523	-1.07996	1.40777	1.3519	2.84037
CD3D	121	0.0651923	0.136348	0.20154	0.814423	0.323471	0.676529	0.866979	76.4686	80.4686	80.6867	80.6274	39.9219	8	58	7.92412e-21	9.381	9.29873	8.79657	9.07849	8.24416	7.55894	7.31072	7.17037	7.47695	1.24788	1.15652	0.598853	0.911932	-0.0146243	-0.775576	-1.05124	-1.20711	-0.866639	-0.0822694	-0.58443	-0.302512	-1.13685	-1.82206	-2.07029	-2.21064	-1.90406	-1.05868	-1.49945	-1.23329	-2.199	-3.53586	-4.1997	-4.6288
CYSLTR2	122	0.0399494	0.266618	0.306567	0.318916	0.130312	0.869688	0.313923	109.844	113.844	114.062	114.003	1.5068	8	58	0.174847	5.34202	5.64763	5.17247	5.37696	5.16038	5.13211	4.8244	5.23238	4.59658	0.576629	1.57211	0.024351	0.690453	-0.0150205	-0.107122	-1.1094	0.219493	-1.85149	0.305615	-0.169551	0.0349444	-0.181638	-0.209914	-0.517617	-0.109642	-0.745438	1.23595	-1.12471	1.02452	-1.13417	-1.15662	-1.43159	-1.07896
LAG3	123	0.0264471	0.329922	0.356369	0.461193	0.0742126	0.925787	0.401233	120.14	124.14	124.358	124.299	3.64365	8	58	0.00169385	4.81572	4.80253	4.80331	4.65523	4.62598	5.36453	4.85444	6.19234	5.14996	-0.431481	-0.45811	-0.456547	-0.755642	-0.814722	0.677031	-0.353267	2.34909	0.243648	-0.0131838	-0.0124098	-0.160488	-0.189738	0.54881	0.0387223	1.37662	0.334247	-1.00918	-1.00864	-1.11767	-1.14056	1.46288	1.0272	2.5966
TNFSF13B	124	0.287962	0.683896	0.971858	2.69435	0.2963	0.7037	0.797744	169.302	173.302	173.52	173.461	22.577	8	58	3.41023e-15	8.94102	9.40057	9.38318	11.7458	12.2397	12.0798	11.6686	10.2622	10.9052	-1.40585	-1.04597	-1.05959	0.790606	1.17741	1.05215	0.730157	-0.371245	0.132333	0.459546	0.442158	2.80476	3.29868	3.13873	2.72757	1.32114	1.96418	1.37511	1.35864	6.98742	9.84017	8.80751	6.62339	2.49863
CCL2	125	0.0118209	0.899649	0.91147	3.66887	0.012969	0.987031	0.787023	175.522	179.522	179.741	179.681	26.3417	8	58	1.20173e-16	4.81572	4.80253	4.89434	5.1198	5.54417	8.90926	8.76336	8.26009	8.17684	-0.948955	-0.956017	-0.906841	-0.786076	-0.558768	1.24371	1.16556	0.89599	0.851398	-0.0131838	0.0786238	0.304083	0.72845	4.09354	3.94765	3.44438	3.36113	-1.00918	1.05601	1.23463	1.65686	17.0718	15.4298	10.8858
SLAMF6	126	0.00614488	0.381121	0.387265	0.511519	0.0158674	0.984133	0.354397	125.859	129.859	130.077	130.018	3.71652	8	58	0.00144628	5.81079	5.94977	5.43609	5.28492	5.06085	5.86467	4.92382	6.45995	5.34128	0.492395	0.776875	-0.274583	-0.584029	-1.04268	0.602683	-1.32317	1.82118	-0.468663	0.138979	-0.374697	-0.525873	-0.749942	0.0538797	-0.886972	0.649159	-0.469512	1.10113	-1.29657	-1.4398	-1.68172	1.03805	-1.84929	1.56825
FEZ1	127	0.00243085	0.080463	0.0828939	0.112987	0.0293249	0.970675	0.389065	36.3253	40.3253	40.5435	40.4842	4.13037	8	58	0.000594506	4.81572	4.80253	4.80331	4.65523	4.45425	4.4456	4.25164	4.38859	4.46174	1.20084	1.13787	1.14157	0.434337	-0.525567	-0.566876	-1.49324	-0.839165	-0.489769	-0.0131838	-0.0124098	-0.160488	-0.36147	-0.370119	-0.564078	-0.42713	-0.353975	-1.00918	-1.00864	-1.11767	-1.28473	-1.29246	-1.47844	-1.34456
LAMP3	128	0	0.123599	0.123599	0.145683	0	1	0.25443	59.6833	61.6833	61.7548	61.7628	2.47411	8	58	0.0221722	4.81572	4.80253	4.80331	4.65523	4.45425	4.4456	4.25284	4.71985	4.48415	1.05148	0.986086	0.989925	0.255481	-0.741356	-0.784255	-1.74031	0.576	-0.593051	-0.0131838	-0.0124098	-0.160488	-0.36147	-0.370119	-0.562877	-0.095865	-0.331568	-1.00918	-1.00864	-1.11767	-1.28473	-1.29246	-1.47721	-1.06871
ITGA2B	129	0.421213	0.254354	0.675567	0.701075	0.623496	0.376504	0.716969	120.22	124.22	124.438	124.379	5.18245	8	58	6.68242e-05	7.43459	7.51878	7.57293	7.97722	7.63474	7.55901	8.69449	8.54026	7.46767	-0.809286	-0.633504	-0.520429	0.323695	-0.391385	-0.549496	1.82132	1.49929	-0.740204	0.0841894	0.138346	0.542631	0.20015	0.124424	1.2599	1.10567	0.0330863	1.06009	1.10064	1.45663	1.14882	1.09007	2.3948	2.15199
PSMD7	130	0.0235349	0.0649958	0.0885307	0.228808	0.265839	0.734161	0.772821	31.9982	35.9982	36.2164	36.1571	20.0431	8	58	4.10456e-14	7.07584	7.15571	7.11917	7.25676	7.40875	7.89048	8.03301	8.27454	8.1072	-1.07441	-0.907925	-0.984095	-0.697286	-0.380461	0.623692	0.920797	1.42425	1.07544	0.0798693	0.0433279	0.180921	0.332914	0.814644	0.957177	1.1987	1.03137	1.05692	1.03049	1.13361	1.25956	1.75886	1.94151	2.29533
MME	131	0.0113945	0.658018	0.669413	2.88311	0.0170216	0.982978	0.802421	157.593	161.593	161.811	161.752	28.5955	8	58	1.9201e-17	7.54013	8.02512	8.76883	8.08851	7.28944	5.15122	4.3451	4.38854	4.51076	0.594736	0.860894	1.26904	0.895684	0.45716	-0.716275	-1.15866	-1.13482	-1.06775	0.484991	1.2287	0.548385	-0.25069	-2.38891	-3.19503	-3.15159	-3.02937	1.39958	2.34356	1.46245	-1.18978	-5.23763	-9.15798	-8.88633
MEF2A	132	0.00373386	0.205744	0.209478	0.616699	0.0178246	0.982175	0.711368	90.2038	94.2038	94.422	94.3627	17.3826	8	58	7.16991e-13	6.82352	7.00792	6.93572	7.5539	8.31196	8.49601	8.22776	7.82384	7.37938	-1.2565	-0.96478	-1.079	-0.101061	1.09819	1.38934	0.964974	0.325983	-0.377148	0.1844	0.112201	0.730373	1.48844	1.67249	1.40424	1.00032	0.555854	1.13634	1.08088	1.65907	2.80586	3.18763	2.64677	2.00044
CXCL2	133	0.0389692	0.30974	0.348709	0.475078	0.111753	0.888247	0.46195	117.895	121.895	122.113	122.054	4.45032	8	58	0.000302237	4.85165	4.80253	4.8219	4.65523	4.45425	5.63343	5.09023	5.97405	5.07033	-0.389295	-0.491189	-0.451009	-0.796795	-1.21376	1.23264	0.10569	1.93932	0.0644082	-0.0491134	-0.0297464	-0.196418	-0.397399	0.781781	0.238586	1.12241	0.218688	-1.03463	-1.02083	-1.14585	-1.31713	1.71925	1.17984	2.1771
IRF3	134	0.0127298	0.0327012	0.045431	0.06886	0.280201	0.719799	0.620887	-7.46172	-3.46172	-3.24353	-3.30283	8.0869	8	58	2.91364e-07	8.78087	8.81031	8.69585	8.79681	8.44325	8.33215	8.46685	8.4741	8.68417	0.949383	1.11234	0.478726	1.03758	-0.919638	-1.53466	-0.788988	-0.748831	0.414082	0.0294372	-0.0850211	0.0159323	-0.337626	-0.448725	-0.314025	-0.306771	-0.0966986	1.02061	-1.0607	1.0111	-1.26368	-1.36483	-1.24317	-1.23694
SERPING1	135	0.0242892	0.482851	0.50714	1.99247	0.0478945	0.952106	0.794489	141.118	145.118	145.336	145.277	26.1206	8	58	1.44778e-16	4.81572	4.80253	4.80331	5.05435	6.65592	7.62321	7.31368	7.44849	8.80726	-1.01609	-1.02471	-1.0242	-0.860025	0.187393	0.819992	0.617562	0.705725	1.59435	-0.0131838	-0.0124098	0.238632	1.84021	2.80749	2.49796	2.63277	3.99155	-1.00918	-1.00864	1.17987	3.58061	7.00067	5.64888	6.20216
HLA-DQB1	136	0.214385	0.327561	0.541946	1.22132	0.395584	0.604416	0.788224	129.102	133.102	133.32	133.261	19.5531	8	58	6.81095e-14	7.1254	7.02657	6.96665	6.95976	5.88321	5.15836	4.92462	5.33699	4.33534	1.0755	0.983619	0.927911	0.921503	-0.0793327	-0.753205	-0.970509	-0.58714	-1.51835	-0.0988316	-0.158754	-0.165646	-1.24219	-1.96704	-2.20078	-1.78841	-2.79006	-1.07091	-1.11632	-1.12167	-2.36558	-3.90965	-4.59729	-3.45435
ALOX12	137	0.00243085	0.080463	0.0828939	0.112987	0.0293249	0.970675	0.389065	36.3253	40.3253	40.5435	40.4842	4.13037	8	58	0.000594506	4.81572	4.80253	4.80331	4.65523	4.45425	4.4456	4.25164	4.38859	4.46174	1.20084	1.13787	1.14157	0.434337	-0.525567	-0.566876	-1.49324	-0.839165	-0.489769	-0.0131838	-0.0124098	-0.160488	-0.36147	-0.370119	-0.564078	-0.42713	-0.353975	-1.00918	-1.00864	-1.11767	-1.28473	-1.29246	-1.47844	-1.34456
EGR1	138	0.147402	0.478362	0.625764	1.33143	0.235555	0.764445	0.711453	146.945	150.945	151.163	151.104	13.8521	8	58	5.17938e-11	7.56432	6.66305	8.478	9.06985	7.99698	7.24339	6.36507	6.46591	4.83351	0.295991	-0.410417	1.01213	1.47601	0.635108	0.0444547	-0.643964	-0.564931	-1.84438	-0.901273	0.913687	1.50553	0.432663	-0.320924	-1.19924	-1.09841	-2.7308	-1.86771	1.88385	2.8393	1.34972	-1.24913	-2.29619	-2.14119
MS4A1	139	0.0948553	0.131458	0.226314	0.946305	0.419132	0.580868	0.890495	76.7274	80.7274	80.9456	80.8863	47.3705	8	58	1.21083e-22	8.37645	8.22281	7.89103	7.73533	6.84383	6.33929	6.27511	6.30075	5.39935	1.27567	1.12873	0.8114	0.662486	-0.190164	-0.672722	-0.73411	-0.709583	-1.5717	-0.153634	-0.485419	-0.641117	-1.53261	-2.03716	-2.10134	-2.0757	-2.9771	-1.11237	-1.39999	-1.55954	-2.8931	-4.10436	-4.29108	-4.21548
LAIR1	140	0.373178	0.312813	0.685991	1.14603	0.543998	0.456002	0.786356	130.11	134.11	134.328	134.269	14.1363	8	58	3.58425e-11	7.29947	7.33871	7.1954	6.79907	7.08036	8.51837	9.1163	8.71931	8.29693	-0.615289	-0.56875	-0.738724	-1.20882	-0.875184	0.830469	1.53968	1.0688	0.567813	0.0392365	-0.104066	-0.500396	-0.219115	1.2189	1.81683	1.41984	0.99746	1.02757	-1.0748	-1.4146	-1.16402	2.3277	3.52307	2.67555
PTGDR2	141	0.0429289	0.429268	0.472197	0.791839	0.0909132	0.909087	0.549335	136.058	140.058	140.276	140.217	7.25162	8	58	1.27428e-06	4.81572	4.80253	4.80331	4.65523	4.45425	5.92281	5.37934	6.79565	5.78202	-0.589034	-0.606209	-0.605201	-0.798106	-1.05993	0.853199	0.145213	1.99028	0.66979	-0.0131838	-0.0124098	-0.160488	-0.36147	1.10709	0.563624	1.97994	0.966301	-1.00918	-1.00864	-1.11767	-1.28473	2.15411	1.47798	3.94476
STAT6	142	0.00735231	0.0463299	0.0536822	0.0899981	0.13696	0.86304	0.578313	8.56551	12.5655	12.7837	12.7244	7.60186	8	58	6.80785e-07	8.33432	8.33961	8.67446	8.58958	8.69835	8.53377	8.96171	8.86073	8.836	-1.41495	-1.39104	0.121253	-0.26211	0.229148	-0.514176	1.41858	0.962486	0.850814	0.0052948	0.340143	0.255259	0.364032	0.199448	0.627393	0.526406	0.50168	1.00368	1.26588	1.19355	1.28702	1.14826	1.54477	1.44034
CD69	143	0.0705982	0.262841	0.33344	0.352786	0.211727	0.788273	0.399364	111.541	115.541	115.759	115.7	1.95166	8	58	0.0692378	5.44457	5.25515	5.15928	5.47108	4.83825	5.18614	4.78885	4.85249	4.94394	1.30659	0.578974	0.210752	1.40843	-1.0224	0.313914	-1.21215	-0.967695	-0.616412	-0.189426	-0.285288	0.0265124	-0.606324	-0.258431	-0.655723	-0.592082	-0.50063	-1.14031	-1.21865	1.01855	-1.52238	-1.19618	-1.57541	-1.50742
IL6	144	0	1.03762	1.03762	4.56091	0	1	0.800073	183.087	185.087	185.158	185.166	29.0132	8	58	1.3837e-17	4.81572	4.80253	4.80331	4.65523	6.09227	9.63382	8.61967	8.67207	8.65648	-0.921074	-0.927351	-0.926982	-0.99749	-0.31324	1.37308	0.890193	0.915142	0.907718	-0.0131838	-0.0124098	-0.160488	1.27655	4.8181	3.80395	3.85635	3.84076	-1.00918	-1.00864	-1.11767	2.42259	28.2094	13.967	14.4836
ARG2	145	0.19704	0.441734	0.638774	1.72419	0.308466	0.691534	0.796125	144.264	148.264	148.482	148.423	22.9408	8	58	2.42621e-15	6.67623	7.20148	7.77723	7.6174	9.27498	9.53358	9.43411	8.7259	8.98296	-1.58946	-1.0931	-0.549024	-0.700056	0.866345	1.11072	1.01672	0.347464	0.590383	0.525254	1.101	0.941172	2.59875	2.85735	2.75788	2.04967	2.30673	1.43919	2.14503	1.92009	6.05762	7.24685	6.76401	4.1401
MPPED1	146	0.00243085	0.080463	0.0828939	0.112987	0.0293249	0.970675	0.389065	36.3253	40.3253	40.5435	40.4842	4.13037	8	58	0.000594506	4.81572	4.80253	4.80331	4.65523	4.45425	4.4456	4.25164	4.38859	4.46174	1.20084	1.13787	1.14157	0.434337	-0.525567	-0.566876	-1.49324	-0.839165	-0.489769	-0.0131838	-0.0124098	-0.160488	-0.36147	-0.370119	-0.564078	-0.42713	-0.353975	-1.00918	-1.00864	-1.11767	-1.28473	-1.29246	-1.47844	-1.34456
ZAP70	147	0.0237107	0.11755	0.14126	0.250326	0.167851	0.832149	0.618212	63.5605	67.5605	67.7787	67.7194	9.46825	8	58	2.92141e-08	5.25004	5.09879	5.03561	4.75015	4.5641	4.4456	4.21219	4.31039	4.39029	1.52923	1.12838	0.960931	0.204402	-0.288649	-0.602711	-1.22127	-0.961026	-0.749274	-0.151253	-0.214435	-0.499898	-0.685941	-0.804447	-1.03785	-0.93965	-0.85975	-1.11053	-1.16025	-1.41411	-1.60875	-1.74648	-2.05317	-1.91806
IL19	148	0.00243085	0.080463	0.0828939	0.112987	0.0293249	0.970675	0.389065	36.3253	40.3253	40.5435	40.4842	4.13037	8	58	0.000594506	4.81572	4.80253	4.80331	4.65523	4.45425	4.4456	4.25164	4.38859	4.46174	1.20084	1.13787	1.14157	0.434337	-0.525567	-0.566876	-1.49324	-0.839165	-0.489769	-0.0131838	-0.0124098	-0.160488	-0.36147	-0.370119	-0.564078	-0.42713	-0.353975	-1.00918	-1.00864	-1.11767	-1.28473	-1.29246	-1.47844	-1.34456
IL12RB2	149	0.00118043	0.197945	0.199126	0.243707	0.00592807	0.994072	0.290212	87.3303	91.3303	91.5485	91.4892	2.87244	8	58	0.00919956	5.06393	5.256	4.98541	5.01486	4.5804	4.68173	4.38715	4.71119	4.67448	0.892085	1.58665	0.608154	0.714637	-0.856457	-0.490018	-1.55529	-0.383517	-0.516242	0.192068	-0.0785155	-0.0490697	-0.483524	-0.382193	-0.676773	-0.352742	-0.389445	1.1424	-1.05593	-1.0346	-1.39816	-1.30332	-1.59856	-1.27699
CRP	150	0.0189332	0.248537	0.26747	0.290258	0.0707864	0.929214	0.28221	103.572	107.572	107.79	107.731	1.8333	8	58	0.0890896	4.81572	4.80253	4.80331	4.65523	4.45425	5.15846	4.87344	5.40489	4.53085	-0.0589266	-0.103398	-0.100787	-0.600288	-1.27824	1.09723	0.135783	1.92847	-1.01984	-0.0131838	-0.0124098	-0.160488	-0.36147	0.342745	0.0577221	0.58917	-0.284865	-1.00918	-1.00864	-1.11767	-1.28473	1.26817	1.04082	1.50438
IFNAR2	151	0.17207	0.155714	0.327785	0.638821	0.524949	0.475051	0.80904	89.1667	93.1667	93.3849	93.3256	20.9927	8	58	1.57594e-14	6.10201	6.71015	6.72643	7.30689	7.68802	7.59844	7.72125	7.64226	7.38356	-1.9495	-0.878301	-0.849628	0.172816	0.844153	0.686369	0.902683	0.763545	0.307861	0.608139	0.624418	1.20488	1.58601	1.49643	1.61924	1.54025	1.28155	1.52429	1.54159	2.30518	3.00218	2.82144	3.07213	2.90845
FPR2	152	0.207767	0.518863	0.72663	4.72016	0.285932	0.714068	0.912304	153.014	157.014	157.232	157.173	66.2919	8	58	2.4283e-26	5.11285	5.59827	6.03773	6.38178	8.35259	9.90503	10.4729	10.0433	10.3417	-1.30188	-1.08505	-0.888747	-0.735063	0.145282	0.838747	1.09239	0.900531	1.03379	0.485414	0.924873	1.26892	3.23973	4.79218	5.36001	4.9305	5.22882	1.39999	1.89852	2.40981	9.4462	27.7071	41.0698	30.4949
MAP4K1	153	0.0624193	0.213891	0.27631	0.660706	0.225903	0.774097	0.739621	99.991	103.991	104.209	104.15	17.1854	8	58	8.96528e-13	6.8257	6.79199	6.75141	6.49328	6.09864	5.46287	4.99415	5.16574	5.35576	1.10528	1.06053	1.00665	0.663901	0.139887	-0.704283	-1.32665	-1.09881	-0.846497	-0.0337078	-0.0742863	-0.332417	-0.727066	-1.36283	-1.83155	-1.65997	-1.46994	-1.02364	-1.05284	-1.25912	-1.65527	-2.5719	-3.5592	-3.16009
BATF3	154	0.0894227	0.375715	0.465138	2.73102	0.19225	0.80775	0.888704	131.695	135.695	135.913	135.854	50.6437	8	58	2.29555e-23	5.48261	5.59218	5.84732	7.04207	7.8628	9.15677	9.42695	8.55542	8.74463	-1.29401	-1.22453	-1.06276	-0.305208	0.215192	1.03566	1.20697	0.654362	0.774328	0.109578	0.364708	1.55946	2.38019	3.67417	3.94435	3.07282	3.26202	1.07891	1.28762	2.94744	5.20607	12.7654	15.3945	8.41415
KIR3DL2	155	0.0505	0.402234	0.452734	0.855096	0.111545	0.888455	0.611775	133.043	137.043	137.261	137.202	9.16027	8	58	4.80891e-08	5.38998	5.75312	5.54036	5.20732	5.41098	6.94314	6.8037	7.04292	6.23049	-0.882472	-0.386243	-0.676976	-1.13207	-0.853776	1.23989	1.04934	1.37623	0.266073	0.363145	0.150384	-0.182657	0.0210001	1.55317	1.41372	1.65294	0.840517	1.28623	1.10987	-1.13497	1.01466	2.93461	2.66423	3.14474
IL10	156	0	0.213925	0.213925	0.354263	0	1	0.469335	91.5013	93.5013	93.5727	93.5808	6.4121	8	58	6.01958e-06	4.81572	4.80253	4.80331	4.66294	4.90245	5.69217	5.64343	5.814	5.04767	-0.698277	-0.727423	-0.725711	-1.03603	-0.506542	1.23931	1.13155	1.50863	-0.185503	-0.0131838	-0.0124098	-0.15278	0.08673	0.876452	0.827709	0.99828	0.23195	-1.00918	-1.00864	-1.11171	1.06196	1.83586	1.77486	1.99762
ARHGDIB	157	0.0984451	0.136925	0.23537	0.294474	0.418256	0.581744	0.633445	79.0692	83.0692	83.2873	83.228	6.1372	8	58	1.01678e-05	11.2949	11.2334	11.2628	11.037	10.7333	10.5486	10.8171	10.3066	10.5563	1.19354	1.02253	1.10432	0.476631	-0.367553	-0.881153	-0.134786	-1.55384	-0.85969	-0.0615207	-0.0320951	-0.257898	-0.56158	-0.746339	-0.477845	-0.988328	-0.738618	-1.04357	-1.0225	-1.19573	-1.47588	-1.67753	-1.39266	-1.98388
TIGIT	158	0.037468	0.220422	0.25789	0.292502	0.145287	0.854713	0.384048	99.3059	103.306	103.524	103.465	2.41704	8	58	0.0251408	6.42936	6.41746	6.2709	6.46186	5.91495	6.44455	5.75753	6.29074	5.47311	0.742862	0.709784	0.302144	0.833251	-0.687906	0.785118	-1.12575	0.357306	-1.91681	-0.0118927	-0.158454	0.0324978	-0.514411	0.0151922	-0.671831	-0.138621	-0.956245	-1.00828	-1.11609	1.02278	-1.42841	1.01059	-1.59309	-1.10085
FCER1A	159	0.0466891	0.554845	0.601534	0.645491	0.0776167	0.922383	0.281594	150.426	154.426	154.644	154.585	1.74444	8	58	0.107406	6.18896	5.85429	5.77946	5.52692	5.23301	5.58385	5.26471	5.70535	4.99813	1.69741	0.778866	0.573462	-0.119662	-0.926356	0.0365944	-0.839355	0.370052	-1.57101	-0.334664	-0.409501	-0.662036	-0.955949	-0.605105	-0.924251	-0.483612	-1.19082	-1.26108	-1.32823	-1.58231	-1.93986	-1.52109	-1.8977	-1.39824
CD68	160	0.0122548	0.211056	0.223311	1.12945	0.0548777	0.945122	0.842132	93.4246	97.4246	97.6428	97.5835	36.0106	8	58	9.2976e-20	6.30224	6.43381	6.3901	6.72222	7.42347	8.21974	8.81097	8.88038	8.4327	-1.11536	-0.994141	-1.03442	-0.72843	-0.0823436	0.651276	1.19599	1.25995	0.847479	0.13157	0.087852	0.419971	1.12123	1.91749	2.50873	2.57814	2.13045	1.09549	1.06279	1.3379	2.17532	3.77766	5.69117	5.97169
PSMB8	161	0	0.223255	0.223255	1.12584	0	1	0.825735	93.9771	95.9771	96.0485	96.0565	34.3534	8	58	2.8201e-19	8.92478	9.32201	9.27265	10.6483	11.4627	11.0222	10.9663	10.3956	10.4172	-1.50933	-1.0637	-1.11908	0.424172	1.33781	0.843626	0.780875	0.140667	0.164949	0.397239	0.347875	1.72353	2.53795	2.09743	2.04149	1.47081	1.49246	1.31698	1.27268	3.30243	5.80764	4.27947	4.11672	2.77178
KLRF2	162	0	0.171009	0.171009	0.160786	0	1	0.0653353	78.5144	80.5144	80.5859	80.5939	0.506792	8	58	0.846351	4.81572	4.83089	4.80331	4.67253	4.67173	4.7444	4.49985	4.66311	4.48415	1.00247	1.1209	0.905594	-0.115285	-0.121513	0.445777	-1.46329	-0.18881	-1.58584	0.0151716	-0.0124098	-0.143187	-0.143985	-0.0713134	-0.31587	-0.152606	-0.331568	1.01057	-1.00864	-1.10434	-1.10495	-1.05067	-1.24476	-1.11158
IL1RL1	163	0.301891	0.40783	0.709721	0.705479	0.425366	0.574634	0.544502	142.546	146.546	146.764	146.705	1.67074	8	58	0.1252	5.35523	6.1853	5.66483	5.44524	5.14627	5.4147	5.41729	5.44005	5.57368	-0.556325	2.3189	0.516049	-0.244545	-1.28015	-0.350338	-0.341362	-0.262549	0.200325	0.830069	0.309592	0.0900101	-0.208967	0.0594679	0.0620594	0.0848122	0.218443	1.77777	1.23936	1.06438	-1.15586	1.04208	1.04395	1.06055
TIRAP	164	0.0311586	0.141367	0.172525	0.192359	0.180603	0.819397	0.404104	74.6525	78.6525	78.8707	78.8114	2.34856	8	58	0.0292246	6.37811	6.5446	6.62191	6.25975	6.19671	6.4935	6.63448	7.0257	6.5759	-0.604925	0.0777995	0.394808	-1.0903	-1.34879	-0.131744	0.446363	2.05062	0.206168	0.166491	0.243797	-0.118364	-0.181401	0.115391	0.256369	0.647587	0.197795	1.12233	1.1841	-1.0855	-1.13398	1.08327	1.19447	1.56655
CCL22	165	0	0.267131	0.267131	0.355417	0	1	0.339504	104.384	106.384	106.455	106.463	3.72659	8	58	0.00141507	4.81572	4.80253	4.80331	4.65523	4.45425	5.18799	5.00812	6.00555	4.72574	-0.276009	-0.305328	-0.303607	-0.632921	-1.07989	0.5519	0.151876	2.37009	-0.476113	-0.0131838	-0.0124098	-0.160488	-0.36147	0.372275	0.192401	1.18984	-0.0899783	-1.00918	-1.00864	-1.11767	-1.28473	1.29439	1.14266	2.28127
XBP1	166	0.173797	0.291293	0.46509	0.747895	0.373685	0.626315	0.691932	121.755	125.755	125.974	125.914	9.98209	8	58	1.29418e-08	7.60198	7.95714	7.91052	8.3914	9.37104	8.86631	8.80747	8.3015	8.34703	-1.44434	-0.797415	-0.882343	-0.00643417	1.77794	0.858592	0.751426	-0.170178	-0.0872484	0.355165	0.308539	0.789421	1.76906	1.26433	1.20549	0.699524	0.745053	1.27913	1.23845	1.72838	3.40831	2.40215	2.30616	1.62397
MEF2BNB	167	0	0.307779	0.307779	0.677643	0	1	0.600862	112.599	114.599	114.671	114.679	10.9142	8	58	3.11513e-09	4.81572	4.84891	4.82181	4.68555	4.84735	6.23577	6.13498	6.30213	5.96278	-0.818319	-0.772307	-0.809868	-0.99874	-0.774474	1.14995	1.01026	1.24193	0.77157	0.0331965	0.0060975	-0.130168	0.031633	1.42005	1.31927	1.48641	1.14706	1.02328	1.00424	-1.09442	1.02217	2.67596	2.49539	2.80191
IFNB1	168	0	0.190359	0.190359	0.214248	0	1	0.219199	84.7318	86.7318	86.8033	86.8113	2.03534	8	58	0.0578347	4.81572	4.80253	4.80331	4.79335	4.96543	4.89535	5.56476	4.85449	4.67327	-0.354733	-0.405643	-0.402654	-0.441097	0.223397	-0.0472243	2.53774	-0.204989	-0.904794	-0.0131838	-0.0124098	-0.0223652	0.149715	0.0796336	0.749045	0.0387781	-0.142446	-1.00918	-1.00864	-1.01562	1.10935	1.05675	1.68068	1.02724
RUNX1	169	0.0081312	0.083809	0.0919402	0.159761	0.0884401	0.91156	0.563487	41.2187	45.2187	45.4369	45.3776	7.96491	8	58	3.59936e-07	7.28922	7.27859	7.57013	7.27699	7.63409	7.89444	8.13531	7.47164	7.29501	-0.811139	-0.845739	0.103361	-0.850954	0.311575	1.15916	1.94328	-0.217269	-0.792274	-0.0106286	0.280912	-0.0122304	0.34487	0.605227	0.84609	0.182422	0.00579459	-1.00739	1.21496	-1.00851	1.27004	1.52122	1.79762	1.13479
IL10RA	170	0.0410811	0.117072	0.158153	0.192993	0.259755	0.740245	0.514475	65.9663	69.9663	70.1844	70.1251	4.436	8	58	0.000311457	8.01369	8.11343	8.04286	8.2009	8.3415	8.00971	7.68046	7.29932	7.33975	0.324246	0.593364	0.402973	0.829374	1.20873	0.313527	-0.574859	-1.60322	-1.49414	0.0997413	0.0291782	0.187212	0.32781	-0.0039725	-0.333229	-0.714362	-0.673934	1.07158	1.02043	1.13856	1.25511	-1.00276	-1.25983	-1.64076
CD86	171	0.00280641	0.0997734	0.10258	0.271436	0.0273583	0.972642	0.684232	48.7056	52.7056	52.9238	52.8645	15.083	8	58	1.08512e-11	6.4125	6.51136	6.3939	6.64081	6.79632	6.28745	5.88207	5.0073	5.29188	0.447974	0.608131	0.417852	0.817817	1.06974	0.245415	-0.41127	-1.82832	-1.36733	0.0988675	-0.0185948	0.22831	0.383823	-0.125043	-0.530425	-1.40519	-1.12062	1.07093	-1.01297	1.17146	1.3048	-1.09054	-1.44435	-2.64853
IL12RB1	172	0.0382441	0.192367	0.230611	0.616705	0.165838	0.834162	0.746281	92.0653	96.0653	96.2835	96.2242	18.2453	8	58	2.75022e-13	5.55369	5.71567	5.90819	6.16078	6.85451	7.22041	7.13788	6.90397	6.98318	-1.43604	-1.18844	-0.89415	-0.508051	0.552379	1.11169	0.985544	0.627995	0.749075	0.161982	0.354504	0.607088	1.30082	1.66671	1.58419	1.35028	1.42949	1.11882	1.27855	1.52318	2.46368	3.17491	2.99839	2.54962
C4A	173	0.0467325	0.233955	0.280687	1.05835	0.166493	0.833507	0.82022	103.438	107.438	107.656	107.597	29.1781	8	58	1.21708e-17	5.17078	5.47289	5.69951	5.93677	6.80611	7.58444	7.29274	7.37677	6.97337	-1.43335	-1.10241	-0.854162	-0.594264	0.358034	1.21064	0.891101	0.983155	0.541259	0.302111	0.528733	0.76599	1.63533	2.41366	2.12196	2.20599	1.80259	1.23295	1.44266	1.70054	3.10658	5.32824	4.35284	4.61391
B2M	174	0.0169596	0.203631	0.220591	0.467554	0.0768827	0.923117	0.635886	92.2589	96.2589	96.477	96.4177	11.1971	8	58	2.04782e-09	14.8589	15.0336	15.2221	15.5122	16.1572	16.1458	16.1526	15.3759	15.3988	-1.36425	-1.0141	-0.636336	-0.0550216	1.23748	1.21453	1.22825	-0.328257	-0.282307	0.174738	0.363255	0.653353	1.29836	1.28691	1.29375	0.516998	0.539929	1.12876	1.28632	1.57282	2.4595	2.44005	2.45165	1.43097
APP	175	0.059383	0.0749817	0.134365	0.322883	0.441954	0.558046	0.81722	44.7234	48.7234	48.9416	48.8823	23.4031	8	58	1.58279e-15	7.58917	7.67921	7.78636	7.89623	8.36892	8.46541	8.92873	8.76696	8.67918	-1.27816	-1.10132	-0.890897	-0.675138	0.253143	0.44262	1.3525	1.03482	0.862433	0.0900467	0.197198	0.307064	0.779755	0.876239	1.33956	1.17779	1.09001	1.0644	1.14647	1.23719	1.71684	1.83558	2.53074	2.2623
DDIT3	176	0.0989513	0.23752	0.336471	1.14703	0.294086	0.705914	0.834956	107.906	111.906	112.124	112.065	30.8631	8	58	3.3843e-18	5.84446	6.08193	6.22317	6.09303	7.45217	8.1268	8.31368	7.6134	7.39767	-1.22367	-0.975689	-0.828193	-0.964095	0.455207	1.15971	1.35486	0.623579	0.398295	0.237471	0.378715	0.248573	1.60771	2.28234	2.46923	1.76894	1.55321	1.17892	1.30018	1.18803	3.04768	4.86468	5.53747	3.40804
APOE	177	0.0345677	0.288695	0.323262	0.442045	0.106934	0.893066	0.460178	113.641	117.641	117.859	117.8	4.58527	8	58	0.000227892	4.81572	4.80253	4.82181	4.65523	4.69214	5.68611	5.54588	5.76294	4.82559	-0.553097	-0.582052	-0.539705	-0.905572	-0.824499	1.35852	1.05054	1.52727	-0.531406	-0.0131838	0.0060975	-0.160488	-0.123574	0.870394	0.730163	0.947227	0.00987605	-1.00918	1.00424	-1.11767	-1.08943	1.82816	1.65883	1.92816
PDGFRB	178	0.072516	0.181465	0.253981	0.322581	0.285518	0.714482	0.551198	92.0696	96.0696	96.2878	96.2285	4.91809	8	58	0.000114498	5.34932	5.50978	5.07461	5.01172	4.71226	5.01758	4.36002	4.93771	4.49407	1.09747	1.52853	0.359495	0.190541	-0.613895	0.206296	-1.56015	-0.00826599	-1.20002	0.160461	-0.274714	-0.337608	-0.637061	-0.331743	-0.989306	-0.411614	-0.855249	1.11764	-1.20975	-1.26366	-1.55516	-1.25853	-1.98523	-1.33017
IL7R	179	0.145598	0.195039	0.340637	1.22524	0.427429	0.572571	0.87459	99.8124	103.812	104.031	103.971	40.3594	8	58	6.0921e-21	10.519	10.371	10.0981	9.84575	9.35319	8.62264	8.01837	7.68246	6.84506	1.13039	1.01732	0.808792	0.615995	0.239659	-0.318506	-0.780185	-1.03683	-1.67663	-0.148001	-0.420927	-0.673267	-1.16583	-1.89638	-2.50065	-2.83656	-3.67395	-1.10803	-1.33879	-1.59468	-2.24363	-3.72278	-5.6594	-7.14315
MAP4K2	180	0.0412609	0.192909	0.23417	0.282035	0.176201	0.823799	0.444888	92.5485	96.5485	96.7666	96.7073	3.15098	8	58	0.00497637	6.45276	6.63274	6.69314	6.45664	6.20989	6.008	6.42157	5.70489	5.75202	0.531932	1.02622	1.1921	0.542594	-0.135079	-0.689534	0.446279	-1.52197	-1.39253	0.179979	0.240379	0.00388216	-0.242872	-0.44476	-0.0311881	-0.747867	-0.700736	1.13287	1.1813	1.00269	-1.18335	-1.36109	-1.02185	-1.67931
TNFRSF13B	181	0	0.156916	0.156916	0.159095	0	1	0.133249	73.5262	75.5262	75.5976	75.6056	1.11457	8	58	0.367152	4.81572	4.80253	4.82301	4.65523	4.45425	4.93424	4.85674	4.90816	5.08831	0.00202908	-0.0717823	0.0428629	-0.896486	-2.02171	0.665602	0.231732	0.519581	1.52817	-0.0131838	0.00729351	-0.160488	-0.36147	0.118524	0.0410284	0.0924423	0.272592	-1.00918	1.00507	-1.11767	-1.28473	1.08562	1.02885	1.06617
TRAF2	182	0.070612	0.512955	0.583567	0.882394	0.121001	0.878999	0.521641	147.478	151.478	151.697	151.637	5.95125	8	58	1.45606e-05	4.95852	4.8813	4.81057	4.65523	4.79993	6.04642	5.26239	6.95991	5.71739	-0.503987	-0.605084	-0.697672	-0.901024	-0.711603	0.92016	-0.106198	2.11599	0.489423	-0.0772277	-0.147955	-0.303295	-0.158597	1.0879	0.30387	2.00139	0.758862	-1.05499	-1.108	-1.23396	-1.1162	2.12565	1.23445	4.00385
SLAMF7	183	0.327348	0.444745	0.772093	1.09029	0.423975	0.576025	0.678557	147.537	151.537	151.755	151.696	7.47939	8	58	8.46474e-07	6.73924	6.93404	6.41295	6.83682	7.61232	8.11112	6.46238	5.65525	5.50616	0.0510559	0.284849	-0.340544	0.168163	1.09889	1.69752	-0.281212	-1.24989	-1.42883	0.194803	-0.326292	0.0975769	0.873085	1.37188	-0.276855	-1.08399	-1.23308	1.14457	-1.25379	1.06997	1.83158	2.58807	-1.21155	-2.11989
POU2F2	184	0.0830459	0.262506	0.345552	0.340177	0.240329	0.759671	0.380691	112.271	116.271	116.489	116.43	1.39601	8	58	0.217656	5.8264	5.83421	5.83774	5.43504	5.71058	5.74891	5.37	5.19621	5.13858	0.917117	0.944655	0.957099	-0.463383	0.508546	0.643764	-0.692817	-1.30586	-1.50912	0.0078066	0.0113344	-0.391359	-0.115826	-0.0774931	-0.456402	-0.630193	-0.687817	1.00543	1.00789	-1.31163	-1.0836	-1.05518	-1.37212	-1.54777
NFKB1	185	0.012361	0.20594	0.218301	0.404217	0.0566236	0.943376	0.569975	92.0764	96.0764	96.2946	96.2353	8.631	8	58	1.15417e-07	8.19597	8.24596	8.3494	8.23388	8.59364	9.50502	9.21195	8.88575	8.75639	-1.00172	-0.894785	-0.673498	-0.920621	-0.150984	1.79874	1.17176	0.47392	0.19719	0.0499882	0.153427	0.0379114	0.397671	1.30905	1.01598	0.689777	0.560422	1.03526	1.11221	1.02663	1.31738	2.47778	2.02227	1.61303
TNFRSF14	186	0.0536855	0.161946	0.215632	0.528515	0.248969	0.751031	0.754389	84.4935	88.4935	88.7117	88.6524	17.3164	8	58	7.72746e-13	5.91786	6.10055	6.25743	6.11289	6.40536	7.18617	7.51535	7.57707	6.84695	-1.15649	-0.870921	-0.625705	-0.851637	-0.394486	0.825976	1.34052	1.43699	0.295753	0.182694	0.339574	0.195031	0.4875	1.26831	1.5975	1.65921	0.92909	1.135	1.26538	1.14475	1.40201	2.40879	3.02617	3.15844
TNFAIP6	187	0.462807	0.666943	1.12975	5.7419	0.409654	0.590346	0.908378	170.688	174.688	174.906	174.847	60.9653	8	58	2.09643e-25	5.77304	6.42767	7.22334	8.33127	10.2362	11.6854	11.1166	10.4035	10.1702	-1.51584	-1.21218	-0.843082	-0.329138	0.554503	1.22677	0.962935	0.63212	0.523904	0.654623	1.45029	2.55822	4.46312	5.91236	5.3436	4.63045	4.39716	1.5742	2.73263	5.88982	22.0564	60.2281	40.6053	24.7687
ICOSLG	188	0.00593898	0.299201	0.30514	0.316798	0.0194631	0.980537	0.183944	112.008	116.008	116.226	116.167	1.33617	8	58	0.244327	4.85616	5.01637	4.91247	4.7194	4.45425	4.99243	4.77977	5.40694	4.48632	0.0311673	0.583565	0.225321	-0.440399	-1.35466	0.501029	-0.23222	1.93028	-1.24408	0.160205	0.0563081	-0.136762	-0.401914	0.136268	-0.076387	0.550775	-0.369845	1.11745	1.0398	-1.09944	-1.32126	1.09906	-1.05437	1.46487
CIITA	189	0.0529157	0.296927	0.349842	1.36864	0.151256	0.848744	0.822934	116.78	120.78	120.998	120.939	30.2239	8	58	5.46332e-18	6.96948	6.94371	6.79611	6.82449	5.32329	4.64568	4.59065	4.62283	4.31405	1.09914	1.07734	0.952494	0.976504	-0.293293	-0.866449	-0.913	-0.885775	-1.14696	-0.0257715	-0.173368	-0.144983	-1.64619	-2.3238	-2.37883	-2.34664	-2.65542	-1.01802	-1.12769	-1.10572	-3.13005	-5.00648	-5.20114	-5.08639
FCGRT	190	0.118059	0.233556	0.351616	0.401432	0.335763	0.664237	0.538275	107.996	111.996	112.214	112.155	3.14088	8	58	0.00508836	6.54526	6.38988	6.9629	6.61942	6.4833	6.94517	7.03829	7.53815	6.92384	-0.788547	-1.22287	0.378882	-0.581249	-0.961717	0.329314	0.589618	1.98687	0.269695	-0.155376	0.417643	0.0741598	-0.0619511	0.39991	0.493033	0.992894	0.378582	-1.11371	1.33574	1.05275	-1.04388	1.31943	1.4074	1.99017
RAC1	191	0.0241337	0.0852808	0.109414	0.122461	0.220571	0.779429	0.439421	46.5086	50.5086	50.7267	50.6674	2.67998	8	58	0.0140758	8.60379	8.71733	8.76566	8.91826	9.03659	8.73443	8.9119	8.43477	8.50365	-0.664488	-0.094974	0.147443	0.912891	1.50646	-0.00920131	0.881023	-1.51232	-1.16684	0.113537	0.161864	0.314462	0.432794	0.130636	0.308108	-0.16902	-0.100147	1.08188	1.11873	1.24355	1.34985	1.09478	1.23808	-1.12429
FOXJ1	192	0.0120583	0.232639	0.244698	0.248987	0.0492784	0.950722	0.208258	98.8268	102.827	103.045	102.986	1.20552	8	58	0.311999	4.81572	4.80253	4.80331	4.65523	4.45425	5.06714	4.67037	5.11207	4.50778	0.22487	0.165978	0.169436	-0.492026	-1.38981	1.34796	-0.424393	1.54866	-1.15068	-0.0131838	-0.0124098	-0.160488	-0.36147	0.25142	-0.145347	0.296351	-0.307938	-1.00918	-1.00864	-1.11767	-1.28473	1.19038	-1.106	1.22803
F13A1	193	0.195882	0.306507	0.502389	0.569918	0.389901	0.610099	0.575157	125.109	129.109	129.327	129.268	4.11053	8	58	0.000620177	7.90479	7.99315	7.93775	8.30065	8.34245	8.53441	9.27269	8.1741	8.34851	-0.973087	-0.761965	-0.89433	-0.0272406	0.072627	0.531264	2.29525	-0.329618	0.0870958	0.088361	0.0329621	0.395866	0.437664	0.629618	1.3679	0.269312	0.44372	1.06316	1.02311	1.31573	1.35441	1.54716	2.58095	1.20523
BTK	194	0.0115867	0.123235	0.134822	0.256337	0.0859408	0.914059	0.599572	63.4848	67.4848	67.7029	67.6436	9.18813	8	58	4.59544e-08	6.2805	6.32808	6.62291	6.52821	7.21693	6.99097	7.25101	6.94272	6.48513	-1.23681	-1.10833	-0.312127	-0.56788	1.29201	0.681802	1.38404	0.551499	-0.684213	0.0475759	0.342412	0.247706	0.93643	0.710467	0.970507	0.662216	0.204627	1.03353	1.26787	1.18732	1.91379	1.63633	1.95953	1.58251
IL17A	195	0.00282927	0.0839374	0.0867667	0.111976	0.0326078	0.967392	0.358352	38.9351	42.9351	43.1533	43.094	3.49832	8	58	0.00232404	4.81572	4.80253	4.80331	4.65523	4.45425	4.63054	4.25296	4.39308	4.46469	1.12541	1.06088	1.06466	0.339807	-0.644018	0.218943	-1.62931	-0.94345	-0.592918	-0.0131838	-0.0124098	-0.160488	-0.36147	-0.185179	-0.562752	-0.422639	-0.351031	-1.00918	-1.00864	-1.11767	-1.28473	-1.13696	-1.47708	-1.34038
BLK	196	0.0751991	0.129437	0.204636	0.322772	0.367477	0.632523	0.682646	74.5557	78.5557	78.7739	78.7146	9.2322	8	58	4.27742e-08	5.59019	5.47503	5.33326	4.91687	4.75523	4.64694	4.61726	5.13617	5.08868	1.48264	1.15927	0.761182	-0.408025	-0.861915	-1.16598	-1.24934	0.207762	0.0744059	-0.115162	-0.256932	-0.673318	-0.83496	-0.943246	-0.972934	-0.45402	-0.501511	-1.0831	-1.19493	-1.59474	-1.78381	-1.92285	-1.96283	-1.36985
CD59	197	0.16799	0.429335	0.597325	1.85904	0.281237	0.718763	0.815655	141.906	145.906	146.124	146.064	26.5119	8	58	1.04205e-16	8.30697	8.5268	8.75656	9.01572	10.3655	11.1018	11.3832	10.7349	10.9892	-1.29427	-1.11666	-0.931042	-0.721662	0.368875	0.963699	1.19103	0.667294	0.872737	0.219831	0.449587	0.70875	2.05857	2.79482	3.0762	2.42794	2.68223	1.1646	1.36565	1.63439	4.16573	6.93944	8.43391	5.38125
HLA-DQA1	198	0.221251	0.152803	0.374054	1.14676	0.591496	0.408504	0.895922	89.7945	93.7945	94.0126	93.9533	47.0425	8	58	1.43808e-22	9.37256	9.17958	8.9381	8.88962	7.67052	7.25274	7.03173	7.27344	6.42392	1.25211	1.0756	0.854745	0.810402	-0.30463	-0.686738	-0.888885	-0.667804	-1.44481	-0.192982	-0.434456	-0.482938	-1.70204	-2.11982	-2.34083	-2.09912	-2.94864	-1.14312	-1.3514	-1.39759	-3.25361	-4.34638	-5.06594	-4.28447
CAMP	199	0.305571	0.26949	0.575062	1.23925	0.531372	0.468628	0.829689	121.143	125.143	125.361	125.302	26.007	8	58	1.59389e-16	8.96823	9.32164	10.0122	9.63857	10.8569	10.8857	11.7004	11.2473	10.5463	-1.50223	-1.11885	-0.369727	-0.775034	0.546631	0.577811	1.46165	0.970093	0.209652	0.35341	1.04396	0.670344	1.88868	1.91743	2.73217	2.27904	1.57805	1.27758	2.06189	1.59145	3.70297	3.77748	6.64452	4.85355
ATG5	200	0.00692049	0.117495	0.124416	0.128293	0.0556239	0.944376	0.226588	59.4846	63.4846	63.7028	63.6435	1.38095	8	58	0.224123	7.23865	7.2293	7.04029	7.33539	7.36275	7.41638	7.54931	7.10757	7.39117	-0.36537	-0.424178	-1.61258	0.242911	0.414968	0.752174	1.588	-1.18956	0.593639	-0.00935274	-0.198356	0.0967408	0.124105	0.177734	0.310662	-0.131078	0.15252	-1.0065	-1.14739	1.06935	1.08983	1.13111	1.24028	-1.09511
NOX1	201	0.00889852	0.0707972	0.0796957	0.104957	0.111656	0.888344	0.443316	32.2887	36.2887	36.5068	36.4475	4.1246	8	58	0.000601858	4.82202	4.83432	4.80331	4.65523	4.45425	4.53594	4.24662	4.64709	4.45141	1.07747	1.13871	0.984325	0.247181	-0.753321	-0.346654	-1.78692	0.206654	-0.767441	0.012301	-0.0187112	-0.166789	-0.367771	-0.286079	-0.575401	-0.17493	-0.370608	1.00856	-1.01305	-1.12256	-1.29036	-1.21932	-1.49009	-1.12891
FKBP5	202	0.047246	0.210433	0.257679	1.42564	0.183352	0.816648	0.88038	97.8087	101.809	102.027	101.968	46.3874	8	58	2.03386e-22	7.93477	8.38723	8.27248	8.54765	10.3122	10.4869	10.607	9.90586	10.4875	-1.34006	-0.936697	-1.039	-0.793681	0.779385	0.935083	1.04222	0.417131	0.935613	0.452461	0.33771	0.612888	2.37745	2.5521	2.67227	1.97109	2.55269	1.36837	1.26375	1.52932	5.19616	5.86486	6.37433	3.92065
SRC	203	0.0599546	0.265394	0.325349	0.946296	0.184278	0.815722	0.772762	111.295	115.295	115.513	115.454	20.4927	8	58	2.59882e-14	5.09732	5.19823	5.16161	5.63795	5.97618	6.89737	6.82813	7.6001	6.94215	-1.1215	-1.01387	-1.05293	-0.544854	-0.184102	0.798453	0.724595	1.54799	0.846214	0.100906	0.0642894	0.540631	0.878854	1.80005	1.7308	2.50277	1.84483	1.07245	1.04557	1.45461	1.83891	3.48232	3.31913	5.66774
DEFB4A	204	0.0666674	0.695033	0.761701	1.55638	0.0875244	0.912476	0.628276	163.878	167.878	168.096	168.037	10.4	8	58	6.77802e-09	4.81572	4.80253	4.80331	4.65523	4.65667	6.69639	5.77137	7.74712	7.25697	-0.708036	-0.71872	-0.718092	-0.838085	-0.836918	0.815934	0.0663599	1.66737	1.27019	-0.0131838	-0.0124098	-0.160488	-0.159049	1.88068	0.955654	2.9314	2.44125	-1.00918	-1.00864	-1.11767	-1.11655	3.68247	1.93946	7.62852
NLRP3	205	0.00861017	0.277366	0.285976	0.787991	0.0301081	0.969892	0.698195	108.14	112.14	112.359	112.299	16.0025	8	58	3.55341e-12	5.61644	5.86129	6.54599	6.61113	7.59746	7.42041	7.10736	6.94058	5.87282	-1.40374	-1.06101	-0.102579	-0.0113945	1.36923	1.1214	0.683204	0.449759	-1.04487	0.244853	0.929556	0.994699	1.98102	1.80397	1.49092	1.32415	0.256383	1.18497	1.90469	1.99266	3.94772	3.4918	2.81069	2.50385
CD70	206	0.0253174	0.440928	0.466246	1.25633	0.0543006	0.945699	0.703409	136.131	140.131	140.35	140.29	15.7941	8	58	4.55926e-12	4.81572	4.80253	4.80331	4.65523	4.45425	6.10284	6.90189	7.43834	6.37066	-0.695579	-0.707364	-0.706672	-0.839038	-1.01869	0.454969	1.16924	1.64877	0.694376	-0.0131838	-0.0124098	-0.160488	-0.36147	1.28712	2.08617	2.62262	1.55494	-1.00918	-1.00864	-1.11767	-1.28473	2.4404	4.2462	6.15869
OAS3	207	0.200116	0.718125	0.91824	6.18247	0.217934	0.782066	0.906456	170.014	174.014	174.232	174.173	62.2183	8	58	1.24434e-25	5.75612	6.50587	6.20254	10.2165	11.0592	11.1831	10.6546	9.25646	9.5524	-1.45479	-1.11134	-1.25029	0.588487	0.974513	1.03129	0.789171	0.148698	0.284264	0.749748	0.446416	4.46038	5.30305	5.427	4.89846	3.50034	3.79627	1.6815	1.36265	22.0144	39.4801	43.0219	29.8252	11.3164
SIGLEC1	208	0	0.244222	0.244222	2.1881	0	1	0.901915	99.1834	101.183	101.255	101.263	66.6656	8	58	2.0997e-26	4.81572	4.80253	4.80331	5.5507	7.28586	8.09731	8.01069	7.58255	6.95181	-1.1338	-1.14304	-1.1425	-0.618657	0.597484	1.16622	1.10551	0.805429	0.363352	-0.0131838	-0.0124098	0.734987	2.47014	3.28159	3.19497	2.76683	2.13609	-1.00918	-1.00864	1.66438	5.54098	9.7243	9.15762	6.80612
CEACAM3	209	0.105472	0.416873	0.522344	1.10794	0.20192	0.79808	0.696151	138.009	142.009	142.227	142.168	13.536	8	58	7.84349e-11	4.84187	4.8966	4.9281	4.70317	5.04383	6.51136	7.19494	6.28628	5.59537	-0.794254	-0.733358	-0.698309	-0.948575	-0.569547	1.06326	1.82383	0.812837	0.0441134	0.054732	0.0862326	-0.1387	0.201961	1.66949	2.35307	1.44441	0.753504	1.03867	1.06159	-1.10091	1.15026	3.18102	5.1091	2.72152
PTPN22	210	0.0478953	0.17993	0.227825	0.373392	0.210229	0.789771	0.611423	89.517	93.517	93.7352	93.6759	8.06572	8	58	3.02222e-07	8.00939	8.0431	7.76115	7.43346	7.19027	7.17182	7.18464	6.70199	7.09099	1.34849	1.42292	0.800493	0.0770963	-0.459754	-0.500474	-0.472188	-1.53766	-0.678922	0.0337147	-0.248238	-0.57593	-0.819118	-0.837564	-0.824751	-1.3074	-0.918399	1.02364	-1.18776	-1.49064	-1.76433	-1.78703	-1.77123	-2.47495
IL1R1	211	0.188861	0.414467	0.603328	1.82728	0.313032	0.686968	0.819587	140.686	144.686	144.904	144.845	27.4173	8	58	4.93692e-17	7.20439	7.40231	7.88619	7.14498	8.64103	9.47538	10.1694	10.1454	11.5338	-1.04544	-0.919303	-0.610917	-1.0833	-0.12984	0.401906	0.84423	0.828898	1.71377	0.197918	0.681798	-0.0594052	1.43664	2.27099	2.96503	2.94097	4.3294	1.14704	1.60414	-1.04204	2.7069	4.82655	7.80842	7.67929
IL1R2	212	0.101981	0.808061	0.910042	2.77087	0.112062	0.887938	0.759356	173.523	177.523	177.741	177.681	20.4202	8	58	2.79618e-14	8.76233	8.76264	9.51228	8.21303	9.06748	11.0914	12.5392	11.7022	13.3525	-0.837874	-0.837706	-0.437985	-1.13077	-0.67516	0.404038	1.17601	0.729746	1.6097	0.000314794	0.74995	-0.549292	0.305153	2.32908	3.77684	2.93991	4.59017	1.00022	1.68173	-1.46337	1.23555	5.02484	13.707	7.67362
CYBB	213	0.0249741	0.144022	0.168996	1.48369	0.147779	0.852221	0.920708	74.7033	78.7033	78.9215	78.8622	76.8352	8	58	5.18843e-28	9.35015	9.57056	9.65701	10.3599	11.1702	11.8159	12.4435	12.2962	12.4031	-1.28025	-1.10998	-1.04319	-0.500189	0.125805	0.624569	1.10941	0.995638	1.07819	0.220409	0.306862	1.00976	1.82009	2.46572	3.09333	2.94606	3.05292	1.16506	1.23701	2.01358	3.53103	5.52404	8.53466	7.70643
CCL18	214	0	0.120468	0.120468	0.130396	0	1	0.18812	58.1953	60.1953	60.2667	60.2747	1.67989	8	58	0.122852	4.81572	4.80253	4.80331	4.65523	4.45425	4.64701	4.46618	4.88505	5.20379	0.294443	0.237018	0.24039	-0.404601	-1.28003	-0.440389	-1.22807	0.59646	1.98477	-0.0131838	-0.0124098	-0.160488	-0.36147	-0.168704	-0.349541	0.0693375	0.388069	-1.00918	-1.00864	-1.11767	-1.28473	-1.12405	-1.27416	1.04923
NFKB2	215	0	0.489033	0.489033	1.12016	0	1	0.616345	139.456	141.456	141.527	141.535	11.6472	8	58	1.06293e-09	5.24183	5.20521	5.36737	5.39423	5.91777	7.30899	7.39986	6.23313	6.72574	-0.964216	-1.00594	-0.821206	-0.790608	-0.194195	1.39067	1.49419	0.165065	0.726237	-0.0366221	0.125537	0.152396	0.675937	2.06716	2.15803	0.991301	1.48391	-1.02571	1.09091	1.11141	1.59763	4.1906	4.46304	1.98798
CD244	216	0.134628	0.334227	0.468855	0.67927	0.287141	0.712859	0.607518	127.536	131.536	131.754	131.695	6.6298	8	58	3.99672e-06	6.01892	6.07378	5.66732	5.43241	4.66867	4.9646	5.4417	4.75881	4.65234	1.28735	1.38527	0.659829	0.240568	-1.12252	-0.594355	0.257158	-0.961633	-1.15166	0.0548682	-0.351599	-0.586511	-1.35025	-1.05432	-0.577215	-1.2601	-1.36658	1.03876	-1.27597	-1.50161	-2.54956	-2.07674	-1.49197	-2.39513
CD14	217	0.150697	0.399321	0.550018	1.16182	0.273985	0.726015	0.725406	137.511	141.511	141.729	141.67	14.8231	8	58	1.49912e-11	8.37697	8.37925	9.01053	8.07795	8.10839	9.88138	10.6841	9.62677	10.5434	-0.786937	-0.78472	-0.171918	-1.0772	-1.04765	0.673438	1.45262	0.42628	1.3161	0.00228336	0.633565	-0.299019	-0.26858	1.50441	2.30709	1.2498	2.16645	1.00158	1.55139	-1.23031	-1.20462	2.83709	4.94883	2.37809
KCNJ2	218	0.356771	0.647125	1.0039	2.02094	0.355387	0.644613	0.746335	167.597	171.597	171.815	171.756	15.0072	8	58	1.19189e-11	7.98942	8.85745	8.81346	9.75189	11.0527	10.802	9.97223	9.14727	9.1188	-1.52764	-0.650143	-0.694615	0.254047	1.56905	1.31561	0.476795	-0.357162	-0.385941	0.868031	0.824039	1.76247	3.06328	2.81257	1.98281	1.15785	1.12938	1.82517	1.77036	3.39277	8.35873	7.02537	3.95262	2.23125
DUSP4	219	0.0716566	0.174738	0.246395	0.308899	0.29082	0.70918	0.54897	90.0174	94.0174	94.2356	94.1763	4.66743	8	58	0.000192076	5.40299	5.09952	5.24365	5.29865	4.72341	4.84254	4.43737	5.03099	4.42288	1.268	0.428432	0.827183	0.979327	-0.612128	-0.282551	-1.40349	0.238823	-1.44359	-0.303463	-0.159333	-0.104341	-0.679576	-0.56045	-0.965618	-0.371998	-0.98011	-1.2341	-1.11677	-1.075	-1.60167	-1.47473	-1.9529	-1.29414
SIRPA	220	0.058487	0.200215	0.258702	0.41609	0.226079	0.773921	0.612994	96.1635	100.164	100.382	100.322	8.63106	8	58	1.15405e-07	8.39131	8.58914	9.18139	8.7276	9.26488	9.15767	9.94878	8.99795	9.09621	-1.43284	-0.995496	0.313829	-0.689383	0.498392	0.261382	2.01031	-0.0917159	0.125518	0.197826	0.790085	0.336293	0.87357	0.766361	1.55747	0.606641	0.704905	1.14697	1.72918	1.26251	1.83219	1.70097	2.94337	1.52271
ZBTB16	221	0.0297297	0.299399	0.329129	0.4937	0.0903285	0.909671	0.495749	115.138	119.138	119.357	119.297	5.66498	8	58	2.54915e-05	4.81572	4.80253	4.80331	4.65523	4.45425	5.66864	4.94456	6.16553	5.62346	-0.502356	-0.525355	-0.524005	-0.78232	-1.13292	0.985525	-0.277592	1.85232	0.906704	-0.0131838	-0.0124098	-0.160488	-0.36147	0.852923	0.128845	1.34981	0.807739	-1.00918	-1.00864	-1.11767	-1.28473	1.80616	1.09342	2.54878
HRAS	222	0.0103358	0.0706765	0.0810123	0.111577	0.127583	0.872417	0.479771	32.7445	36.7445	36.9627	36.9034	4.85265	8	58	0.000130971	4.87675	4.93111	4.80331	4.65523	4.86287	4.59006	4.23	4.60958	5.15453	0.497704	0.704545	0.21828	-0.345126	0.444917	-0.593085	-1.96303	-0.518802	1.5546	0.0543634	-0.0734402	-0.221518	-0.0138738	-0.286689	-0.646748	-0.267165	0.277781	1.0384	-1.05222	-1.16596	-1.00966	-1.21984	-1.56564	-1.20344
KIR3DL1	223	0.0921973	0.740576	0.832773	1.51469	0.110711	0.889289	0.596371	168.416	172.416	172.635	172.575	8.68997	8	58	1.04564e-07	4.81572	4.8558	4.80331	4.65523	4.45425	6.30829	5.48631	7.85646	6.91381	-0.635487	-0.60181	-0.645913	-0.770318	-0.939169	0.61847	-0.0720976	1.91914	1.12718	0.0400852	-0.0124098	-0.160488	-0.36147	1.49257	0.670597	3.04075	2.09809	1.02817	-1.00864	-1.11767	-1.28473	2.8139	1.59173	8.22917
CD19	224	0.00476626	0.510514	0.51528	0.785515	0.00924984	0.99075	0.433733	142.462	146.462	146.68	146.621	5.37419	8	58	4.54287e-05	6.42044	6.10332	5.70783	5.79598	4.80634	6.42629	5.91564	7.07889	6.7449	0.465341	-0.011654	-0.606535	-0.473949	-1.96252	0.474134	-0.29395	1.45574	0.953383	-0.317118	-0.71261	-0.624464	-1.6141	0.00584589	-0.504796	0.658446	0.324463	-1.24584	-1.63877	-1.54164	-3.06121	1.00406	-1.41892	1.57838
RIPK1	225	0.00178609	0.137341	0.139127	0.449054	0.0128378	0.987162	0.73433	66.5024	70.5024	70.7206	70.6613	19.6391	8	58	6.22751e-14	7.61813	7.89427	7.86776	8.71434	9.18244	8.88407	8.70456	8.31204	8.17206	-1.42465	-0.902927	-0.953027	0.646439	1.53083	0.967109	0.627957	-0.113642	-0.378095	0.276143	0.249625	1.09621	1.56431	1.26594	1.08643	0.693904	0.553932	1.21095	1.1889	2.13792	2.95736	2.40483	2.12347	1.61765
TAPBP	226	0.0188057	0.159328	0.178133	0.713045	0.105571	0.894429	0.815221	79.1164	83.1164	83.3346	83.2753	29.198	8	58	1.19846e-17	8.08806	8.25058	8.51595	9.08039	9.68133	9.93446	9.99898	9.46809	9.51577	-1.49498	-1.2705	-0.903956	-0.124327	0.705721	1.05535	1.14447	0.411186	0.477042	0.162523	0.427895	0.992333	1.59327	1.8464	1.91092	1.38004	1.42771	1.11924	1.34527	1.9894	3.01734	3.59601	3.7605	2.60275
MALT1	227	0.122454	0.315098	0.437552	1.01161	0.279862	0.720138	0.751329	123.927	127.927	128.145	128.086	16.5301	8	58	1.90737e-12	8.40699	8.29264	7.79315	7.9963	6.98997	6.87132	6.53356	5.90871	6.25431	1.28054	1.1564	0.614149	0.834696	-0.257799	-0.386613	-0.753288	-1.43164	-1.05645	-0.114348	-0.613836	-0.410683	-1.41702	-1.53567	-1.87343	-2.49828	-2.15268	-1.08249	-1.53032	-1.32932	-2.67033	-2.89923	-3.66402	-5.65011
CD40LG	228	0.0112457	0.250665	0.261911	0.524318	0.0429371	0.957063	0.593409	102.871	106.871	107.089	107.03	9.77089	8	58	1.80388e-08	6.51345	6.50982	6.38426	6.28267	6.00364	5.51983	4.87236	5.4949	4.80558	1.02615	1.02078	0.83478	0.68429	0.270958	-0.445718	-1.40484	-0.482645	-1.50376	-0.0036266	-0.129191	-0.230783	-0.509811	-0.993618	-1.64109	-1.01855	-1.70787	-1.00252	-1.09368	-1.17347	-1.42386	-1.99117	-3.11902	-2.02588
TMEM173	229	0.0110938	0.169469	0.180563	1.02214	0.0614399	0.93856	0.860398	80.9763	84.9763	85.1944	85.1351	42.1044	8	58	2.18438e-21	6.92002	6.86793	7.22656	7.4292	8.80325	8.71314	9.31333	8.90127	8.9075	-1.21894	-1.27183	-0.907614	-0.701817	0.693652	0.60214	1.21168	0.793198	0.799533	-0.0520843	0.306545	0.509183	1.88323	1.79312	2.39331	1.98125	1.98749	-1.03676	1.23674	1.42324	3.689	3.46564	5.25361	3.94834
ICAM3	230	0.108493	0.167217	0.27571	0.440852	0.393503	0.606497	0.700449	90.0527	94.0527	94.2709	94.2116	11.3795	8	58	1.56724e-09	6.48292	6.60357	7.00967	6.85806	7.22426	7.55817	7.85603	7.77525	7.61221	-1.44571	-1.20908	-0.412574	-0.709925	0.00831895	0.663253	1.24746	1.08902	0.769239	0.120646	0.526742	0.375139	0.741334	1.07525	1.37311	1.29232	1.12929	1.08722	1.44067	1.29696	1.67172	2.10709	2.59028	2.44922
IRF7	231	0.0594875	0.614646	0.674134	4.54319	0.088243	0.911757	0.887418	156.776	160.776	160.995	160.935	53.2433	8	58	6.5369e-24	5.48523	6.05693	6.5561	9.22289	10.2471	10.116	9.67566	9.54642	8.79592	-1.57776	-1.26951	-1.00035	0.437579	0.98982	0.919125	0.681711	0.612028	0.207359	0.571694	1.07087	3.73766	4.76185	4.63074	4.19043	4.06119	3.31069	1.48627	2.1007	13.3397	27.1306	24.7737	18.2576	16.6932
CXCR6	232	0.0392483	0.31719	0.356438	0.370588	0.110113	0.889887	0.293277	119.215	123.215	123.433	123.374	1.4939	8	58	0.179418	5.08568	5.33378	5.04072	4.79276	4.66917	5.32003	4.72546	5.17848	4.56461	0.409378	1.27137	0.253169	-0.608355	-1.03775	1.22361	-0.842183	0.731796	-1.40103	0.248098	-0.0449599	-0.292922	-0.416511	0.23435	-0.360222	0.0927977	-0.521069	1.18764	-1.03165	-1.22512	-1.3347	1.17638	-1.28362	1.06644
PSMC2	233	0.109063	0.237875	0.346937	0.354528	0.314358	0.685642	0.466397	108.515	112.515	112.734	112.674	1.77093	8	58	0.101607	8.30599	8.3146	7.81533	8.55519	8.14497	8.276	8.44317	7.88539	8.69949	0.120534	0.150295	-1.57572	0.982024	-0.436122	0.0168413	0.594789	-1.33354	1.48089	0.00860888	-0.490659	0.249195	-0.161018	-0.0299941	0.137183	-0.420605	0.393498	1.00599	-1.40509	1.18854	-1.11808	-1.02101	1.09976	-1.33849
IL21R	234	0.0157683	0.239295	0.255063	0.425931	0.0618213	0.938179	0.527041	101.004	105.004	105.222	105.163	6.59462	8	58	4.26878e-06	6.35531	6.32494	6.13603	6.05919	6.1877	6.63173	7.28043	7.53386	7.46961	-0.516039	-0.56677	-0.882261	-1.01057	-0.795969	-0.0544123	1.02895	1.45219	1.34489	-0.0303771	-0.219288	-0.296119	-0.167618	0.276415	0.925115	1.17855	1.11429	-1.02128	-1.16416	-1.22784	-1.1232	1.21118	1.89884	2.26348
TNFRSF1B	235	0.0257084	0.11635	0.142058	0.598581	0.180971	0.819029	0.842403	63.3678	67.3678	67.586	67.5267	33.4575	8	58	5.23141e-19	7.48252	7.82117	7.89059	8.13491	9.09766	9.101	9.2221	8.94803	8.93264	-1.53276	-1.02978	-0.926675	-0.563798	0.866115	0.871076	1.05093	0.643873	0.621017	0.338655	0.408073	0.652395	1.61515	1.61849	1.73958	1.46551	1.45012	1.26458	1.32691	1.57178	3.06342	3.07053	3.33937	2.76161
HSPB1	236	0.0460599	0.520751	0.566811	1.49517	0.0812615	0.918739	0.709358	146.891	150.891	151.11	151.05	15.8206	8	58	4.41687e-12	4.81572	4.80253	4.80331	4.65523	4.71622	6.66167	6.83408	7.71943	6.54528	-0.762785	-0.773806	-0.773159	-0.89695	-0.84596	0.780389	0.924525	1.66465	0.683091	-0.0131838	-0.0124098	-0.160488	-0.0994938	1.84595	2.01837	2.90371	1.72956	-1.00918	-1.00864	-1.11767	-1.0714	3.59489	4.05125	7.48348
TCF7	237	0.172975	0.536156	0.709131	0.93943	0.243925	0.756075	0.542202	153.791	157.791	158.009	157.95	4.62135	8	58	0.00021139	5.84597	5.42646	5.35057	5.07584	4.80259	6.38141	5.57225	6.80949	6.27479	0.18181	-0.457122	-0.572712	-0.991128	-1.4073	0.997314	-0.235084	1.6493	0.834921	-0.419511	-0.495405	-0.770129	-1.04338	0.535444	-0.273725	0.963524	0.42882	-1.33747	-1.40972	-1.70542	-2.06105	1.44939	-1.20893	1.95007
CCR7	238	0.228834	0.27242	0.501254	0.583027	0.456524	0.543476	0.63257	119.907	123.907	124.125	124.066	4.53493	8	58	0.000253147	6.59924	6.47389	6.18843	6.12229	5.50231	5.88128	5.7489	5.98972	5.16131	1.40079	1.12479	0.496262	0.350635	-1.01444	-0.180029	-0.471504	0.0587496	-1.76526	-0.125349	-0.410809	-0.476949	-1.09692	-0.71796	-0.850339	-0.609514	-1.43792	-1.09077	-1.32943	-1.3918	-2.13898	-1.64485	-1.80292	-1.52575
CCR8	239	0.00497642	0.0800205	0.0849969	0.115576	0.0585482	0.941452	0.416195	37.3312	41.3312	41.5494	41.4901	4.25103	8	58	0.000460102	4.81572	4.80253	4.80331	4.71232	4.45425	4.4456	4.24993	4.38262	4.44851	1.14996	1.08868	1.09228	0.669352	-0.530158	-0.57036	-1.47983	-0.863076	-0.556842	-0.0131838	-0.0124098	-0.103401	-0.36147	-0.370119	-0.565788	-0.433096	-0.367211	-1.00918	-1.00864	-1.0743	-1.28473	-1.29246	-1.4802	-1.35013
CASP1	240	0	0.411595	0.411595	1.87336	0	1	0.806922	129.457	131.457	131.529	131.537	30.2996	8	58	5.15999e-18	8.5896	9.21257	9.32041	10.6245	11.9945	11.5355	10.9114	10.5345	10.1327	-1.54339	-0.986874	-0.890538	0.274429	1.49827	1.08828	0.53071	0.194005	-0.164901	0.622971	0.730812	2.0349	3.4049	2.94594	2.32179	1.94487	1.5431	1.54004	1.65957	4.09794	10.5919	7.70579	4.99951	3.85003
PDCD1LG2	241	0.0149611	0.346693	0.361654	1.05742	0.0413686	0.958631	0.720898	121.61	125.61	125.828	125.769	17.6487	8	58	5.3174e-13	4.88188	5.09968	5.02277	5.05971	6.47071	7.10822	6.85	5.84107	5.89815	-1.08619	-0.829513	-0.920152	-0.876615	0.78619	1.53747	1.23317	0.0441898	0.111455	0.217806	0.140893	0.177837	1.58883	2.22634	1.96812	0.959199	1.01628	1.16296	1.10259	1.13119	3.00806	4.67945	3.91259	1.94423
GZMH	242	0.632778	0.244743	0.877521	1.46642	0.721097	0.278903	0.870222	120.927	124.927	125.145	125.086	26.8099	8	58	8.13128e-17	9.67858	9.83329	9.17624	9.25441	8.67559	8.04462	7.33659	7.18064	6.85603	1.0892	1.22618	0.644412	0.713629	0.201117	-0.357554	-0.984465	-1.12255	-1.40997	0.154707	-0.502342	-0.424168	-1.003	-1.63396	-2.34199	-2.49794	-2.82255	1.1132	-1.41651	-1.3418	-2.00416	-3.10363	-5.07001	-5.64879
SELPLG	243	0.106719	0.185828	0.292547	0.372264	0.364792	0.635208	0.604872	95.4633	99.4633	99.6815	99.6222	5.73082	8	58	2.23934e-05	7.82513	7.98537	8.25705	8.27858	8.86157	8.45521	8.7547	8.51133	8.56673	-1.66242	-1.18948	-0.387668	-0.324144	1.39644	0.197157	1.08105	0.362784	0.526274	0.160248	0.431927	0.453452	1.03644	0.630086	0.929577	0.686206	0.741602	1.11748	1.34903	1.36931	2.05117	1.54766	1.90472	1.60905
MAVS	244	0.0549688	0.564546	0.619515	1.12452	0.0887288	0.911271	0.582306	151.864	155.864	156.082	156.023	8.37672	8	58	1.77322e-07	4.81572	4.80253	4.80331	4.65523	4.45425	6.02761	5.72362	7.40195	6.00519	-0.61887	-0.632601	-0.631794	-0.786016	-0.995337	0.643303	0.326702	2.07466	0.619951	-0.0131838	-0.0124098	-0.160488	-0.36147	1.21189	0.907903	2.58623	1.18947	-1.00918	-1.00864	-1.11767	-1.28473	2.31641	1.87632	6.00527
CLEC4A	245	0.210258	0.399732	0.60999	2.08002	0.344691	0.655309	0.847615	139.388	143.388	143.606	143.547	32.953	8	58	7.45215e-19	7.12955	7.51777	8.25732	7.62898	9.36234	10.25	10.513	9.88977	9.0934	-1.3645	-1.05644	-0.469603	-0.968197	0.407247	1.1116	1.32028	0.825774	0.193845	0.388219	1.12777	0.499429	2.23279	3.12042	3.38341	2.76022	1.96385	1.30878	2.1852	1.41365	4.70041	8.6964	10.4354	6.775
CREB1	246	0.0124218	0.112639	0.125061	0.158293	0.0993259	0.900674	0.41028	58.7753	62.7753	62.9935	62.9342	3.37004	8	58	0.00307623	8.29232	8.26002	8.47259	8.39166	8.56718	8.55547	8.33116	7.70349	7.64739	0.13322	0.0386573	0.660877	0.423992	0.937761	0.90348	0.246896	-1.59034	-1.75454	-0.0323061	0.180268	0.0993389	0.274862	0.26315	0.038836	-0.588834	-0.644931	-1.02265	1.13309	1.07128	1.20988	1.2001	1.02728	-1.50403
CD276	247	0.0535423	0.41986	0.473402	1.00857	0.113101	0.886899	0.656601	135.586	139.586	139.804	139.745	11.4107	8	58	1.49743e-09	4.81572	4.80253	4.80331	4.65523	4.60762	5.91869	6.29712	7.28212	6.02663	-0.686991	-0.700883	-0.700067	-0.856105	-0.906269	0.47527	0.874046	1.91199	0.589011	-0.0131838	-0.0124098	-0.160488	-0.208093	1.10297	1.48141	2.4664	1.21091	-1.00918	-1.00864	-1.11767	-1.15516	2.14797	2.79221	5.52664
ITGB1	248	0.0211659	0.0592887	0.0804546	0.133407	0.263079	0.736921	0.644449	26.5939	30.5939	30.8121	30.7528	9.49444	8	58	2.80118e-08	9.86175	9.78363	9.67435	9.69929	9.50772	9.28159	9.27327	9.03695	8.95975	1.24111	1.00384	0.671904	0.74764	0.165754	-0.521092	-0.546356	-1.26416	-1.49864	-0.0781171	-0.187399	-0.162464	-0.354037	-0.580164	-0.588482	-0.824803	-0.901999	-1.05564	-1.13871	-1.1192	-1.27813	-1.49502	-1.50366	-1.77129
NFATC2	249	0.0126971	0.171234	0.183931	0.660984	0.0690321	0.930968	0.782661	81.8921	85.8921	86.1102	86.0509	24.3508	8	58	6.72169e-16	6.86823	6.63098	6.54326	6.58704	6.24087	5.37033	4.95502	4.96399	4.69648	1.15263	0.877878	0.776302	0.827001	0.426119	-0.582018	-1.06297	-1.05258	-1.36236	-0.237256	-0.324969	-0.28119	-0.627359	-1.4979	-1.91321	-1.90425	-2.17175	-1.17875	-1.25264	-1.2152	-1.54473	-2.82432	-3.76646	-3.74313
PPARG	250	0	0.146322	0.146322	0.14802	0	1	0.131293	69.4719	71.4719	71.5433	71.5513	1.09574	8	58	0.379404	4.81572	4.80253	4.80331	4.65523	4.45425	4.68881	4.45616	4.70694	4.48415	1.08499	0.997672	1.0028	0.0220523	-1.30908	0.244454	-1.29638	0.364537	-1.11104	-0.0131838	-0.0124098	-0.160488	-0.36147	-0.126909	-0.359552	-0.108778	-0.331568	-1.00918	-1.00864	-1.11767	-1.28473	-1.09195	-1.28303	-1.07831
HSPB2	251	0.0737754	0.389279	0.463054	0.814699	0.159323	0.840677	0.61077	132.744	136.744	136.963	136.903	9.17729	8	58	4.67727e-08	6.12785	6.27104	5.88379	6.1998	6.40846	7.37997	7.22277	8.31484	7.30296	-0.825758	-0.647237	-1.13005	-0.736047	-0.475901	0.735359	0.539362	1.90093	0.639341	0.143187	-0.244063	0.0719544	0.28061	1.25213	1.09492	2.18699	1.17511	1.10434	-1.18432	1.05114	1.21471	2.38192	2.13602	4.55356
IL5RA	252	0.0287526	0.134499	0.163252	0.238107	0.176124	0.823876	0.541557	71.6279	75.6279	75.8461	75.7868	5.66109	8	58	2.56877e-05	4.89155	5.30725	5.02224	4.93243	4.56154	4.52372	4.28294	4.38813	4.42441	0.54182	1.74148	0.918985	0.659796	-0.410546	-0.519689	-1.21457	-0.91099	-0.806293	0.4157	0.130693	0.0408802	-0.330008	-0.367828	-0.608612	-0.503419	-0.46714	1.33395	1.09482	1.02874	-1.25702	-1.29041	-1.52479	-1.41757
RNASEL	253	0.0592671	0.312286	0.371553	0.841963	0.159512	0.840488	0.697878	119.969	123.969	124.187	124.127	13.5221	8	58	7.98909e-11	5.44147	6.12049	5.95344	6.43734	7.3327	7.20574	7.23575	6.77168	6.76626	-1.75935	-0.714646	-0.971654	-0.22716	1.15039	0.955056	1.00123	0.287234	0.278901	0.679021	0.511974	0.99587	1.89123	1.76427	1.79428	1.33021	1.32479	1.60105	1.426	1.99428	3.70952	3.39702	3.46842	2.51439
CFD	254	0	0.363641	0.363641	1.85878	0	1	0.828079	122.273	124.273	124.344	124.352	34.9206	8	58	1.91978e-19	11.1911	11.3354	11.7067	11.4286	11.2667	9.05949	8.57865	8.36587	7.54044	0.69676	0.785103	1.01235	0.842114	0.743038	-0.607739	-0.902012	-1.03223	-1.53739	0.144353	0.515676	0.237509	0.0756172	-2.13157	-2.61241	-2.82519	-3.65062	1.10524	1.42966	1.17896	1.05381	-4.38193	-6.11525	-7.08705
IFIT3	255	0.021849	0.849511	0.87136	8.91505	0.0250746	0.974925	0.918008	172.815	176.815	177.033	176.974	79.1673	8	58	2.36416e-28	7.7868	8.91739	9.00661	13.4201	14.4909	14.588	13.7079	13.1834	12.2257	-1.57189	-1.14246	-1.10857	0.567796	0.974531	1.01143	0.677122	0.477914	0.114135	1.13059	1.21981	5.63327	6.70411	6.80124	5.9211	5.39664	4.4389	2.18948	2.32916	49.6346	104.265	111.526	60.594	42.1259
IL11	256	0.0380015	0.400454	0.438455	0.648914	0.0866714	0.913329	0.486143	131.866	135.866	136.084	136.025	5.40946	8	58	4.23334e-05	4.81572	4.80253	4.80331	4.65523	4.45425	5.66593	5.1927	6.52858	5.13934	-0.474174	-0.494888	-0.493672	-0.726332	-1.04211	0.861673	0.118139	2.21706	0.0343071	-0.0131838	-0.0124098	-0.160488	-0.36147	0.850211	0.376983	1.71286	0.323627	-1.00918	-1.00864	-1.11767	-1.28473	1.80276	1.29862	3.2781
PDCD2	257	0	0.359648	0.359648	0.456324	0	1	0.30739	121.632	123.632	123.704	123.712	3.21766	8	58	0.00429757	5.01604	4.99568	4.98212	4.86872	4.88652	5.71798	5.48487	6.14351	4.72574	-0.393268	-0.436245	-0.464849	-0.704221	-0.666647	1.08836	0.596329	1.98655	-1.00601	-0.0203611	-0.033913	-0.147319	-0.129518	0.701946	0.468837	1.12748	-0.290299	-1.01421	-1.02379	-1.10751	-1.09393	1.6267	1.38399	2.18476
CD47	258	0.00577174	0.217104	0.222876	0.528462	0.0258966	0.974103	0.646716	93.7274	97.7274	97.9456	97.8863	12.647	8	58	2.60082e-10	10.4696	10.5561	10.4687	10.7567	11.6926	11.9207	11.6158	10.7701	10.5558	-0.864307	-0.717492	-0.865904	-0.376652	1.21307	1.60061	1.08267	-0.353981	-0.718015	0.0864294	-0.000939996	0.287079	1.22294	1.45108	1.14617	0.300426	0.0861213	1.06174	-1.00065	1.22017	2.33421	2.73413	2.21326	1.23151
CEACAM8	259	0.0536654	0.338978	0.392643	0.430358	0.136677	0.863323	0.354733	123.985	127.985	128.203	128.143	2.14095	8	58	0.0460065	7.16069	7.38647	7.8803	7.23458	7.29086	7.17194	7.57597	6.56354	7.21632	-0.324356	0.312792	1.70635	-0.115841	0.0429742	-0.292615	0.847553	-2.00949	-0.167367	0.225782	0.719609	0.0738901	0.130168	0.0112481	0.415282	-0.597151	0.0556311	1.16941	1.64674	1.05255	1.09442	1.00783	1.33356	-1.51273
TNFSF11	260	0	0.111742	0.111742	0.131517	0	1	0.253349	53.8339	55.8339	55.9053	55.9133	2.46003	8	58	0.0228707	4.81572	4.80253	4.80331	4.65523	4.99129	4.4456	4.39456	4.80664	4.48415	0.619132	0.554828	0.558604	-0.163649	1.4755	-1.18612	-1.43505	0.574856	-0.998094	-0.0131838	-0.0124098	-0.160488	0.175575	-0.370119	-0.421155	-0.00907763	-0.331568	-1.00918	-1.00864	-1.11767	1.12941	-1.29246	-1.339	-1.00631
IRGM	261	0	0.129582	0.129582	0.124653	0	1	0.086468	62.425	64.425	64.4965	64.5045	0.68623	8	58	0.701833	4.81572	4.80253	4.80331	4.65523	4.64712	4.84663	4.55384	4.87753	4.48415	0.679526	0.585267	0.590801	-0.4679	-0.525863	0.900567	-1.19281	1.12147	-1.69106	-0.0131838	-0.0124098	-0.160488	-0.168595	0.0309166	-0.26188	0.0618143	-0.331568	-1.00918	-1.00864	-1.11767	-1.12396	1.02166	-1.19904	1.04378
S1PR1	262	0.0342417	0.164952	0.199194	0.241995	0.171901	0.828099	0.446297	83.336	87.336	87.5541	87.4948	3.38045	8	58	0.00300691	8.03047	8.00584	7.64369	7.52159	7.52409	7.5005	7.37699	7.96828	7.18728	1.30646	1.22407	0.0128303	-0.395578	-0.387202	-0.466117	-0.879194	1.09846	-1.51373	-0.0246315	-0.386775	-0.508882	-0.506378	-0.529972	-0.653476	-0.0621891	-0.843192	-1.01722	-1.30747	-1.42295	-1.42048	-1.4439	-1.57295	-1.04405
MBP	263	0.168851	0.252667	0.421518	0.521207	0.400579	0.599421	0.61736	114.168	118.168	118.386	118.327	5.23805	8	58	5.97251e-05	5.51303	5.56265	5.89048	6.02197	6.30877	6.54939	6.01161	6.73866	6.02666	-1.35836	-1.23718	-0.436568	-0.115463	0.584959	1.17257	-0.140759	1.6348	-0.10401	0.0496231	0.377453	0.508938	0.795745	1.03636	0.49858	1.22563	0.513628	1.03499	1.29905	1.423	1.73597	2.05105	1.41282	2.33858
FADD	264	0.00327072	0.111679	0.11495	0.267205	0.0284534	0.971547	0.64123	55.2974	59.2974	59.5156	59.4563	12.3244	8	58	4.06706e-10	5.91167	6.13351	6.12231	6.05643	6.62883	6.89317	6.91063	6.99045	6.37673	-1.28439	-0.752216	-0.779088	-0.937127	0.436001	1.07011	1.11199	1.30348	-0.168767	0.221844	0.210642	0.144762	0.717165	0.981502	0.998959	1.07878	0.465061	1.16622	1.1572	1.10555	1.64395	1.97452	1.99856	2.11226
GBP1	265	0.160166	1.0333	1.19347	5.43063	0.134202	0.865798	0.84402	188.547	192.547	192.766	192.706	35.1898	8	58	1.60235e-19	9.75641	10.7034	10.9641	14.3339	15.0444	14.529	13.8643	13.3032	13.8477	-1.64442	-1.15333	-1.01815	0.729422	1.09787	0.830598	0.485879	0.194882	0.477244	0.946993	1.20766	4.57753	5.28802	4.77264	4.10791	3.54677	4.09126	1.92785	2.30962	23.8768	39.0709	27.3342	17.2426	11.6865
TNF	266	0.0935133	0.43313	0.526644	1.18287	0.177565	0.822435	0.702912	139.502	143.502	143.72	143.661	14.329	8	58	2.7995e-11	5.6313	5.66822	5.92939	5.77531	5.94791	7.66168	7.9502	7.32322	7.05355	-0.979835	-0.940414	-0.661551	-0.82607	-0.641785	1.18807	1.49614	0.826691	0.538753	0.0369205	0.298093	0.14401	0.316604	2.03038	2.3189	1.69192	1.42225	1.02592	1.22952	1.10497	1.2454	4.08512	4.98951	3.23087
CTLA4	267	0.0422751	0.421719	0.463994	0.507214	0.0911114	0.908889	0.308867	135.037	139.037	139.255	139.195	1.87513	8	58	0.0815263	5.41255	5.07531	5.24778	5.00069	4.82573	5.6817	4.91723	5.85214	5.64883	0.315063	-0.594811	-0.129483	-0.796159	-1.26819	1.04124	-1.02133	1.5011	0.952571	-0.337235	-0.164766	-0.411863	-0.586816	0.269148	-0.495321	0.439593	0.236286	-1.26333	-1.12098	-1.3304	-1.50193	1.2051	-1.40963	1.35622
HDAC4	268	0.0786023	0.178837	0.25744	0.360427	0.305323	0.694677	0.605018	91.738	95.738	95.9562	95.8969	6.75796	8	58	3.14768e-06	5.87267	6.13255	6.25649	6.29366	7.01196	6.69477	6.77507	6.25972	6.32149	-1.49032	-0.758699	-0.409761	-0.30513	1.71708	0.824115	1.05015	-0.400673	-0.226773	0.259876	0.383821	0.420987	1.13929	0.822103	0.902394	0.387049	0.44882	1.19738	1.30479	1.33884	2.20273	1.76798	1.86917	1.30772
IL4R	269	0.0331365	0.255109	0.288245	1.05947	0.114959	0.885041	0.80149	106.754	110.754	110.972	110.913	26.4449	8	58	1.10203e-16	5.99597	6.15046	6.11427	6.47027	7.87615	8.1623	8.16733	7.20613	7.06501	-1.15578	-0.981945	-1.02267	-0.622073	0.959899	1.2819	1.28756	0.205955	0.0471569	0.154488	0.118299	0.474301	1.88017	2.16633	2.17136	1.21016	1.06903	1.11303	1.08545	1.38924	3.6812	4.48881	4.50448	2.31363
PSMB7	270	0.00924708	0.0753243	0.0845714	0.0916974	0.109341	0.890659	0.321574	35.801	39.801	40.0192	39.9599	1.69999	8	58	0.117836	8.36779	8.37571	8.25237	8.43378	8.34126	8.3517	8.66211	8.32928	9.01084	-0.383162	-0.349633	-0.871675	-0.103841	-0.495436	-0.451253	0.862586	-0.546156	2.33857	0.00792186	-0.115419	0.0659939	-0.0265265	-0.0160876	0.294327	-0.0385099	0.643051	1.00551	-1.08329	1.04681	-1.01856	-1.01121	1.22631	-1.02705
MASP1	271	0.0037353	0.0885051	0.0922404	0.118574	0.0404953	0.959505	0.364272	42.3778	46.3778	46.596	46.5367	3.51189	8	58	0.00225624	4.81572	4.80253	4.80331	4.65523	4.45425	4.4456	4.25127	4.5119	4.45906	1.18706	1.12132	1.12518	0.386826	-0.615322	-0.658449	-1.62742	-0.327863	-0.591343	-0.0131838	-0.0124098	-0.160488	-0.36147	-0.370119	-0.564446	-0.30382	-0.356661	-1.00918	-1.00864	-1.11767	-1.28473	-1.29246	-1.47882	-1.23441
CHUK	272	0	0.0773385	0.0773385	0.0850907	0	1	0.201274	32.4901	34.4901	34.5615	34.5695	1.82695	8	58	0.0902938	7.4473	7.59568	7.45701	7.62292	7.60909	7.48458	7.88926	7.70397	7.6463	-1.14556	-0.0760945	-1.0756	0.120239	0.0206067	-0.876844	2.04	0.704449	0.288811	0.148375	0.00970627	0.175614	0.161791	0.0372812	0.441956	0.256666	0.199001	1.10832	1.00675	1.12944	1.11868	1.02618	1.35844	1.19471
FCGR2A	273	0.241274	0.440767	0.682041	1.44907	0.353753	0.646247	0.759005	145.283	149.283	149.501	149.442	16.541	8	58	1.88327e-12	10.555	10.8382	11.3632	11.6842	13.2199	12.7555	12.4083	11.3542	11.6093	-1.36277	-1.04101	-0.444387	-0.0795036	1.66567	1.13784	0.743318	-0.454518	-0.164634	0.283136	0.808145	1.12923	2.66492	2.20044	1.85328	0.799229	1.05432	1.21684	1.75096	2.18742	6.34192	4.5962	3.61321	1.74017
PLA2G2E	274	0.00951654	0.357371	0.366887	0.360182	0.0259386	0.974061	0.146797	122.636	126.636	126.855	126.795	0.879422	8	58	0.539244	4.81572	4.80253	4.80331	4.65523	4.66969	5.14802	4.78724	5.36595	4.5161	-0.0945938	-0.145073	-0.14211	-0.709089	-0.653706	1.17777	-0.203619	2.01222	-1.24179	-0.0131838	-0.0124098	-0.160488	-0.146024	0.332303	-0.0284741	0.550237	-0.299615	-1.00918	-1.00864	-1.11767	-1.10652	1.25902	-1.01993	1.46433
MMP3	275	0.00420039	0.167022	0.171223	0.171612	0.0245318	0.975468	0.162237	78.4493	82.4493	82.6675	82.6082	1.04466	8	58	0.414071	4.81572	4.80253	4.80331	4.65523	4.45425	4.94703	4.88802	4.67145	4.48922	0.53056	0.453288	0.457824	-0.410081	-1.58806	1.30018	0.954352	-0.315008	-1.38306	-0.0131838	-0.0124098	-0.160488	-0.36147	0.131309	0.0723057	-0.144267	-0.326493	-1.00918	-1.00864	-1.11767	-1.28473	1.09529	1.0514	-1.10517
MAX	276	0.0346838	0.101012	0.135696	0.271214	0.2556	0.7444	0.701736	57.296	61.296	61.5142	61.4549	12.7968	8	58	2.11822e-10	9.59208	9.8126	9.9306	10.1637	10.6107	10.5862	10.5729	10.0943	10.01	-1.52727	-0.926383	-0.60484	0.0303001	1.24828	1.18163	1.14542	-0.158699	-0.388444	0.220522	0.338526	0.571619	1.01861	0.994151	0.980863	0.502257	0.417942	1.16515	1.26446	1.48619	2.02597	1.99191	1.97365	1.41643
LTA	277	0	0.30898	0.30898	0.30209	0	1	0.101171	112.825	114.825	114.896	114.904	0.816047	8	58	0.5915	4.81572	4.80253	4.80331	4.65523	4.45425	4.8802	4.59657	5.19343	4.48415	0.320559	0.262583	0.265987	-0.385179	-1.26899	0.60413	-0.643109	1.98151	-1.1375	-0.0131838	-0.0124098	-0.160488	-0.36147	0.0644854	-0.219142	0.377708	-0.331568	-1.00918	-1.00864	-1.11767	-1.28473	1.04571	-1.16404	1.29928
MAP2K4	278	0.0578934	0.165429	0.223323	0.424372	0.259236	0.740764	0.687972	86.0059	90.0059	90.2241	90.1648	10.7694	8	58	3.86997e-09	9.45934	9.51455	9.072	9.45474	9.33376	9.08856	8.59007	7.7904	7.67166	0.802089	0.879337	0.260102	0.795649	0.626364	0.283271	-0.41425	-1.53321	-1.69936	0.0552062	-0.387336	-0.00460227	-0.125583	-0.370778	-0.869268	-1.66894	-1.78768	1.03901	-1.30798	-1.0032	-1.09095	-1.29305	-1.82674	-3.17981
GATA3	279	0.0391038	0.263242	0.302346	0.403339	0.129334	0.870666	0.464246	109.072	113.072	113.29	113.231	4.19323	8	58	0.000520115	4.88803	4.84112	4.80331	4.65523	4.45425	5.32723	4.90194	6.04713	4.59259	-0.119962	-0.217605	-0.296339	-0.604622	-1.02304	0.794406	-0.090987	2.29317	-0.735019	-0.046901	-0.0847192	-0.232797	-0.433779	0.4392	0.0139177	1.15911	-0.295431	-1.03304	-1.06048	-1.17511	-1.35077	1.35585	1.00969	2.23319
IKZF1	280	0.00502743	0.0803882	0.0854157	0.0944298	0.0588584	0.941142	0.282281	37.6103	41.6103	41.8285	41.7692	2.01223	8	58	0.060789	8.91142	8.95598	8.95319	8.93363	9.25618	9.0367	9.2122	8.72933	8.91817	-0.485835	-0.209083	-0.226408	-0.347927	1.65547	0.292233	1.3823	-1.61683	-0.44392	0.0445583	0.0417689	0.0222038	0.344759	0.125272	0.300778	-0.182095	0.00674843	1.03137	1.02938	1.01551	1.26994	1.09071	1.23181	-1.13453
PLAU	281	0.0938302	0.642209	0.736039	2.31683	0.12748	0.87252	0.772337	160.735	164.735	164.954	164.894	21.9624	8	58	6.11774e-15	4.81655	5.13444	5.41623	5.05514	6.30908	8.34515	8.09316	7.05103	6.1745	-1.10141	-0.859872	-0.64577	-0.920125	0.0326201	1.57964	1.38818	0.596361	-0.0696301	0.317892	0.599677	0.238591	1.49252	3.5286	3.27661	2.23448	1.35795	1.24651	1.51538	1.17984	2.81381	11.5402	9.69077	4.70592
CRADD	282	0.0424903	0.431695	0.474185	1.65469	0.0896071	0.910393	0.783009	136.335	140.335	140.554	140.494	23.6833	8	58	1.22556e-15	4.89209	4.8488	4.87509	4.66572	4.77585	6.87106	7.09469	8.17616	7.08762	-0.753362	-0.785066	-0.765811	-0.919137	-0.83849	0.695926	0.859702	1.65171	0.854524	-0.0432903	-0.0169977	-0.226362	-0.11624	1.97897	2.2026	3.28408	2.19553	-1.03046	-1.01185	-1.16988	-1.08391	3.94212	4.60309	9.74106
PLA2G2A	283	0.106811	0.686533	0.793344	1.2754	0.134634	0.865366	0.558782	164.848	168.848	169.066	169.007	7.01972	8	58	1.94278e-06	4.81572	4.80253	4.80331	4.65523	4.6717	6.36156	5.65726	7.29247	5.80604	-0.662441	-0.676669	-0.675833	-0.835641	-0.81786	1.00585	0.245765	2.0105	0.40633	-0.0131838	-0.0124098	-0.160488	-0.144012	1.54584	0.841545	2.47675	0.990325	-1.00918	-1.00864	-1.11767	-1.10497	2.91974	1.79197	5.56643
TARP	284	0.0842693	0.184267	0.268536	1.08962	0.31381	0.68619	0.865502	93.6905	97.6905	97.9087	97.8494	39.0904	8	58	1.3148e-20	7.5511	7.47604	6.85569	6.97596	5.99817	6.02127	4.93198	4.92759	4.55222	1.23046	1.16485	0.622635	0.727758	-0.126879	-0.106694	-1.05879	-1.06262	-1.39072	-0.0750596	-0.695409	-0.575138	-1.55293	-1.52983	-2.61912	-2.62351	-2.99888	-1.0534	-1.61934	-1.48982	-2.93411	-2.88752	-6.14375	-6.16246
LTBR	285	0	0.209911	0.209911	0.747243	0	1	0.753136	90.4025	92.4025	92.474	92.482	22.1184	8	58	5.26816e-15	5.0027	5.01847	5.36989	5.77132	6.54831	6.75422	6.9613	6.17091	6.24031	-1.33801	-1.31646	-0.836293	-0.287782	0.773884	1.05524	1.33818	0.258205	0.353038	0.0157675	0.367185	0.768618	1.54561	1.75152	1.95859	1.1682	1.23761	1.01099	1.28983	1.70364	2.91927	3.36713	3.88683	2.24732
CFP	286	0.0257077	0.200512	0.22622	0.369773	0.11364	0.88636	0.552767	92.7404	96.7404	96.9586	96.8993	7.30338	8	58	1.16065e-06	9.1443	9.26452	9.59308	9.51128	9.59786	9.88786	10.6509	9.74247	10.0981	-1.26953	-1.00494	-0.281855	-0.46189	-0.271355	0.366869	2.04621	0.0469084	0.829577	0.120225	0.448788	0.366982	0.453559	0.743562	1.50664	0.598175	0.953812	1.0869	1.36489	1.28965	1.36941	1.6743	2.84147	1.5138
IL18	287	0.0705618	0.297109	0.36767	0.927113	0.191916	0.808084	0.74073	118.071	122.071	122.289	122.23	17.1151	8	58	9.71309e-13	6.72962	6.8498	6.47932	6.70617	7.18082	8.5812	8.54749	7.89252	8.90651	-0.857388	-0.730477	-1.12173	-0.882152	-0.380894	1.098	1.06239	0.370708	1.44154	0.120173	-0.250307	-0.0234496	0.451198	1.85158	1.81787	1.1629	2.17689	1.08687	-1.18946	-1.01639	1.36718	3.60895	3.52559	2.23907
TLR9	288	0.064784	0.480721	0.545505	0.939135	0.11876	0.88124	0.578499	143.636	147.636	147.854	147.795	7.82843	8	58	4.56702e-07	4.81572	4.80253	4.80331	4.65523	4.45425	6.02146	5.42774	7.03384	6.00388	-0.605728	-0.621097	-0.620194	-0.792814	-1.02711	0.799849	0.107726	1.98001	0.779356	-0.0131838	-0.0124098	-0.160488	-0.36147	1.20574	0.612021	2.21812	1.18817	-1.00918	-1.00864	-1.11767	-1.28473	2.30656	1.5284	4.65287
IFIH1	289	0.0587562	0.468501	0.527258	4.19679	0.111437	0.888563	0.907864	141.885	145.885	146.103	146.044	66.1017	8	58	2.61559e-26	7.20804	7.93948	8.07139	10.9581	11.8717	11.8743	11.2432	10.3754	10.0245	-1.54103	-1.13021	-1.05612	0.565214	1.07831	1.07977	0.725307	0.237915	0.0408472	0.731439	0.863354	3.75008	4.66363	4.66622	4.03512	3.16734	2.81646	1.66029	1.81926	13.4551	25.345	25.3905	16.3943	8.98386
IL26	290	0.0318078	0.30514	0.336947	0.524906	0.0944	0.9056	0.517373	116.394	120.394	120.612	120.552	6.12575	8	58	1.03941e-05	4.81572	4.80253	4.80331	4.65523	4.45425	5.66108	4.99858	6.34571	4.79994	-0.374412	-0.396682	-0.395374	-0.645503	-0.984995	1.05355	-0.0655248	2.21001	-0.401066	-0.0131838	-0.0124098	-0.160488	-0.36147	0.845365	0.182864	1.53	-0.0157792	-1.00918	-1.00864	-1.11767	-1.28473	1.79672	1.13513	2.88785
MARCO	291	0.0114397	0.226966	0.238406	0.518024	0.0479839	0.952016	0.628462	97.3375	101.337	101.556	101.496	11.157	8	58	2.17231e-09	4.81572	4.80253	4.80331	4.65523	4.90311	6.17055	6.11104	5.4408	5.01343	-0.643939	-0.666583	-0.665253	-0.919584	-0.493838	1.68304	1.58084	0.429666	-0.304353	-0.0131838	-0.0124098	-0.160488	0.0873927	1.35483	1.29533	0.625082	0.197716	-1.00918	-1.00864	-1.11767	1.06245	2.55767	2.45433	1.5423
CD36	292	0.145244	0.442163	0.587408	0.605938	0.247263	0.752737	0.414946	142.703	146.703	146.921	146.862	1.41532	8	58	0.209599	5.97587	5.80232	5.94475	5.85014	6.25859	6.57419	6.32403	6.58184	5.66603	-0.393532	-0.907946	-0.485769	-0.766215	0.444446	1.37991	0.638436	1.4026	-1.31193	-0.173551	-0.0311184	-0.125734	0.282713	0.598316	0.348161	0.60597	-0.309844	-1.12783	-1.0218	-1.09106	1.21648	1.51395	1.27294	1.522
KLRD1	293	0.173842	0.248624	0.422467	0.895971	0.411494	0.588506	0.781144	113.501	117.501	117.719	117.659	18.1145	8	58	3.174e-13	8.10752	8.2304	7.53094	7.46285	6.96378	6.76334	5.97695	6.25618	6.14034	1.26497	1.41168	0.576556	0.495262	-0.100591	-0.339906	-1.27881	-0.945423	-1.08373	0.12288	-0.576589	-0.644677	-1.14374	-1.34418	-2.13058	-1.85134	-1.96719	1.08891	-1.49132	-1.56339	-2.20953	-2.53886	-4.37892	-3.60836
TLR8	294	0.0826377	0.274265	0.356902	0.489189	0.231541	0.768459	0.549458	114.569	118.569	118.787	118.728	5.14822	8	58	7.16194e-05	8.30306	8.62947	9.11771	8.86854	9.47407	8.42472	8.77746	8.21569	7.76952	-0.620259	0.0184729	0.973891	0.486309	1.67124	-0.382178	0.308069	-0.791225	-1.66432	0.326409	0.814653	0.565486	1.17101	0.121666	0.474401	-0.0873679	-0.53354	1.25389	1.75888	1.47989	2.2517	1.08799	1.38934	-1.06243
NFATC4	295	0.0190348	0.106152	0.125187	0.131639	0.152051	0.847949	0.341991	57.1459	61.1459	61.364	61.3047	1.81981	8	58	0.091668	4.81572	4.82408	4.89806	4.65523	4.61892	4.59006	4.38508	4.86371	4.46275	0.746663	0.792449	1.19731	-0.131688	-0.330419	-0.488364	-1.61019	1.00934	-1.1851	0.00836568	0.0823405	-0.160488	-0.196799	-0.225658	-0.430634	0.0479946	-0.352962	1.00582	1.05873	-1.11767	-1.14615	-1.16931	-1.34783	1.03383
CLEC4E	296	0.320837	0.466792	0.78763	1.48921	0.407345	0.592655	0.752709	149.935	153.935	154.154	154.094	15.188	8	58	9.5313e-12	7.41859	7.96051	8.6133	7.56544	8.64862	9.74979	10.1203	9.06152	8.82321	-1.35519	-0.764726	-0.0534545	-1.19518	-0.0149807	1.18483	1.58854	0.434906	0.175254	0.541919	1.19472	0.146854	1.23003	2.3312	2.70172	1.64293	1.40462	1.45591	2.289	1.10715	2.34571	5.03224	6.50577	3.12299
CXCL11	297	0.0352242	0.68151	0.716735	2.36292	0.0491454	0.950855	0.755582	161.161	165.161	165.379	165.32	21.0794	8	58	1.4463e-14	4.8699	4.87357	4.83465	5.32513	6.32052	8.41571	7.34136	7.61088	7.43834	-1.04567	-1.04306	-1.0708	-0.721136	-0.0115132	1.48216	0.716246	0.908391	0.785384	0.00366412	-0.0352523	0.455229	1.45062	3.54581	2.47146	2.74098	2.56844	1.00254	-1.02474	1.371	2.73326	11.6787	5.54604	6.68525
LAIR2	298	0.0904003	0.711857	0.802257	1.86106	0.112682	0.887318	0.684432	166.193	170.193	170.411	170.351	13.1985	8	58	1.22947e-10	4.81572	4.80253	4.80331	4.65523	4.45425	6.58896	6.32627	8.37216	7.12232	-0.690114	-0.699636	-0.699077	-0.80603	-0.951193	0.590652	0.400917	1.8786	0.975875	-0.0131838	-0.0124098	-0.160488	-0.36147	1.77325	1.51056	3.55645	2.3066	-1.00918	-1.00864	-1.11767	-1.28473	3.41823	2.8492	11.7651
SIGIRR	299	0.102621	0.362118	0.464739	0.607112	0.220813	0.779187	0.519873	130.385	134.385	134.603	134.544	4.49533	8	58	0.000275017	7.05122	6.71309	6.66905	6.61907	6.13191	7.14645	7.09249	8.12846	6.46815	0.282355	-0.313894	-0.391558	-0.4797	-1.33875	0.450289	0.355137	2.18195	-0.745832	-0.338125	-0.382167	-0.432151	-0.919306	0.0952328	0.0412735	1.07724	-0.583071	-1.26411	-1.3033	-1.34924	-1.89121	1.06824	1.02902	2.10999
BATF	300	0	0.492292	0.492292	2.34463	0	1	0.815484	139.841	141.841	141.913	141.921	32.0421	8	58	1.4274e-18	5.44059	5.70864	5.52238	6.34568	7.65436	8.93348	8.80162	7.98858	7.55501	-1.20364	-1.00987	-1.14452	-0.54935	0.396705	1.32139	1.22607	0.638321	0.324885	0.268043	0.0817833	0.905082	2.21376	3.49289	3.36103	2.54799	2.11441	1.20417	1.05833	1.87265	4.63884	11.2581	10.2747	5.84819
CFL1	301	0.00344114	0.0681351	0.0715763	0.17867	0.0480765	0.951923	0.676639	27.5497	31.5497	31.7679	31.7086	14.0713	8	58	3.89735e-11	10.5306	10.6619	10.6405	10.8729	11.0966	11.1928	11.6076	11.1422	11.4693	-1.31182	-0.962393	-1.01941	-0.401426	0.193491	0.449404	1.5526	0.314862	1.18469	0.13139	0.109951	0.342324	0.566024	0.662252	1.07707	0.611661	0.938733	1.09535	1.07919	1.2678	1.48044	1.58255	2.10975	1.52802
CD6	302	0.0865997	0.231437	0.318037	0.741042	0.272295	0.727705	0.750432	105.829	109.829	110.047	109.988	17.8361	8	58	4.31573e-13	7.94949	7.73831	7.54926	7.34341	6.68644	6.33632	6.23484	6.03518	5.60413	1.33561	1.08347	0.857766	0.611996	-0.172378	-0.590401	-0.711557	-0.949933	-1.46457	-0.211187	-0.40023	-0.606081	-1.26305	-1.61318	-1.71466	-1.91431	-2.34536	-1.15764	-1.31972	-1.52212	-2.40003	-3.05925	-3.28218	-3.76934
IL4	303	0	0.299407	0.299407	0.468435	0	1	0.438309	111	113	113.071	113.079	5.65746	8	58	2.58723e-05	4.81572	4.80253	4.80331	4.65523	4.9224	5.69315	5.87365	5.90929	5.24031	-0.742825	-0.768947	-0.767414	-1.06081	-0.531438	0.995695	1.35333	1.42395	0.0984548	-0.0131838	-0.0124098	-0.160488	0.106687	0.877433	1.05793	1.09358	0.424595	-1.00918	-1.00864	-1.11767	1.07675	1.8371	2.08195	2.13402
TRAF4	304	0	0.363449	0.363449	0.43453	0	1	0.264965	122.242	124.242	124.313	124.321	2.61348	8	58	0.0163032	5.64898	5.57056	5.39242	5.58701	5.38404	6.11244	5.79719	6.71029	6.22216	-0.398787	-0.57644	-0.979996	-0.539167	-0.998989	0.651155	-0.0630219	2.00553	0.899715	-0.0784195	-0.256557	-0.0619665	-0.264941	0.463465	0.148213	1.06131	0.573184	-1.05586	-1.19462	-1.04389	-1.20159	1.37885	1.1082	2.08683
CD8A	305	0.044116	0.239114	0.28323	0.316159	0.15576	0.84424	0.383401	104.365	108.365	108.583	108.523	2.13634	8	58	0.0464705	6.33454	6.33815	5.73081	6.08383	5.98309	6.35208	6.18322	6.75955	6.15346	0.424094	0.436707	-1.68588	-0.452095	-0.804189	0.485389	-0.104727	1.90945	-0.208748	0.00360906	-0.603732	-0.250706	-0.351452	0.0175386	-0.151313	0.425008	-0.181077	1.0025	-1.51964	-1.18979	-1.27584	1.01223	-1.11058	1.34258
IKBKAP	306	0.00615629	0.145545	0.151702	0.35191	0.0405816	0.959418	0.64776	71.2326	75.2326	75.4507	75.3914	12.4469	8	58	3.42973e-10	6.90232	6.81687	6.6768	6.63153	6.12891	5.82722	5.73847	5.73667	5.6435	1.2874	1.1229	0.853247	0.766086	-0.201523	-0.782311	-0.953171	-0.95663	-1.136	-0.0854525	-0.22552	-0.270795	-0.773414	-1.0751	-1.16385	-1.16565	-1.25882	-1.06102	-1.1692	-1.20647	-1.70931	-2.10687	-2.24055	-2.24334
CXCR1	307	0.108615	0.511902	0.620517	1.19578	0.17504	0.82496	0.652485	149.116	153.116	153.334	153.275	10.3425	8	58	7.40294e-09	7.91138	8.40759	8.93604	8.89697	10.3239	9.72225	9.25084	8.44326	7.55552	-1.05639	-0.484228	0.125119	0.0800696	1.72548	1.03167	0.488105	-0.4431	-1.46673	0.496206	1.02466	0.985591	2.41257	1.81087	1.33946	0.531875	-0.35586	1.4105	2.03448	1.98012	5.3242	3.50853	2.53056	1.44581
C9	308	0.0142956	0.204182	0.218477	0.223695	0.0654329	0.934567	0.232937	91.9506	95.9506	96.1688	96.1095	1.21608	8	58	0.306026	4.9476	4.88848	4.82181	4.65523	4.61493	4.99143	5.09559	5.21572	4.55169	0.367869	0.105456	-0.190439	-0.929816	-1.10869	0.562398	1.0247	1.55786	-1.38935	-0.0591231	-0.12579	-0.292375	-0.332677	0.0438284	0.147988	0.268112	-0.39591	-1.04183	-1.0911	-1.22465	-1.25935	1.03085	1.10802	1.20423
TRAF1	309	0.0207124	0.444718	0.465431	0.814351	0.0445016	0.955498	0.535985	136.194	140.194	140.413	140.353	7.50207	8	58	8.12917e-07	6.5339	6.40948	6.21575	5.94469	5.4276	7.53436	7.16632	7.38741	6.32752	-0.0227057	-0.201895	-0.480886	-0.871229	-1.6159	1.41806	0.888043	1.20642	-0.319913	-0.124429	-0.318159	-0.58921	-1.1063	1.00046	0.63242	0.853501	-0.206379	-1.09008	-1.24674	-1.50442	-2.15293	2.00064	1.55016	1.80688
RHOA	310	0.00388744	0.0989615	0.102849	0.196738	0.0377976	0.962202	0.570863	48.7299	52.7299	52.9481	52.8888	8.99082	8	58	6.34795e-08	9.21925	9.18829	9.34163	9.371	9.58104	9.6347	10.3019	9.76418	10.2083	-0.994873	-1.0711	-0.693598	-0.621297	-0.104192	0.0279072	1.67042	0.346682	1.44005	-0.0309634	0.122375	0.151744	0.361788	0.415445	1.08262	0.544929	0.989046	-1.02169	1.08853	1.11091	1.28502	1.33371	2.11788	1.45895
CEACAM1	311	0.264191	0.681968	0.946159	1.05166	0.279225	0.720775	0.482257	168.692	172.692	172.91	172.851	2.93019	8	58	0.0080978	8.01418	7.83193	8.12518	7.69474	7.68873	8.38327	9.40101	8.83299	8.79185	-0.493712	-0.80089	-0.306625	-1.03213	-1.04224	0.128388	1.84378	0.88638	0.817052	-0.182249	0.110999	-0.319442	-0.325444	0.369092	1.38684	0.81881	0.777678	-1.13465	1.07998	-1.24785	-1.25305	1.29154	2.61505	1.76395
DEFB1	312	0	0.444827	0.444827	0.676223	0	1	0.421924	133.961	135.961	136.032	136.04	5.29161	8	58	5.36169e-05	4.91314	4.88304	5.14169	5.40687	6.35221	5.91972	5.35044	6.05397	6.5183	-1.14489	-1.19396	-0.772337	-0.34007	1.20093	0.495932	-0.432047	0.714773	1.47167	-0.0301	0.228546	0.493724	1.43906	1.00658	0.4373	1.14083	1.60515	-1.02108	1.17165	1.40808	2.71145	2.00914	1.35407	2.20507
ITLN1	313	0.0488496	0.325462	0.374312	0.387988	0.130505	0.869495	0.311636	121.417	125.417	125.636	125.576	1.41387	8	58	0.210198	5.33943	5.45061	5.26775	5.49756	5.5484	5.88175	5.21336	5.02741	4.5654	0.0794152	0.381298	-0.115232	0.508802	0.646861	1.55205	-0.262923	-0.767861	-2.02241	0.111173	-0.0716817	0.158129	0.208971	0.542319	-0.126071	-0.312023	-0.774029	1.08011	-1.05094	1.11584	1.15586	1.45631	-1.09132	-1.24145
C4B	314	0.0382673	0.594778	0.633046	1.05429	0.0604495	0.939551	0.524755	153.754	157.754	157.973	157.913	6.90244	8	58	2.40962e-06	4.9102	4.82725	4.90412	4.66063	4.78664	6.22573	5.66901	7.17833	6.30702	-0.655958	-0.748761	-0.662757	-0.935153	-0.794187	0.815746	0.192933	1.88144	0.906695	-0.0829552	-0.00607777	-0.249567	-0.12356	1.31553	0.758806	2.26813	1.39682	-1.05919	-1.00422	-1.18885	-1.08942	2.48893	1.69209	4.81698
KLRC3	315	0.70073	0.254824	0.955553	1.52004	0.733323	0.266677	0.86969	123.68	127.68	127.899	127.839	25.0048	8	58	3.77562e-16	8.16605	8.33249	7.73986	7.1584	6.77798	6.44433	6.11553	5.67332	5.33616	1.21739	1.37259	0.819989	0.277811	-0.0769004	-0.388018	-0.6946	-1.10694	-1.42132	0.166449	-0.426191	-1.00765	-1.38806	-1.72172	-2.05052	-2.49273	-2.82989	1.12229	-1.34368	-2.01063	-2.61727	-3.2983	-4.14254	-5.62842
CD1E	316	0.00582309	0.0807379	0.086561	0.110009	0.0672716	0.932728	0.38377	38.2141	42.2141	42.4323	42.373	3.50604	8	58	0.00228523	4.81572	4.80253	4.80331	4.65523	4.45425	4.4456	4.35519	4.38176	4.44712	1.24795	1.18005	1.18404	0.421388	-0.613733	-0.658279	-1.12392	-0.987079	-0.650425	-0.0131838	-0.0124098	-0.160488	-0.36147	-0.370119	-0.460529	-0.43396	-0.368594	-1.00918	-1.00864	-1.11767	-1.28473	-1.29246	-1.37605	-1.35094
FN1	317	0.240854	0.316126	0.55698	1.02548	0.432428	0.567572	0.757216	127.946	131.946	132.164	132.105	13.2199	8	58	1.19474e-10	8.98267	9.39839	9.46026	10.084	9.41383	8.46709	8.04004	7.56349	6.66919	0.282374	0.664447	0.721315	1.29455	0.678643	-0.191487	-0.583978	-1.02196	-1.8439	0.415712	0.477588	1.10129	0.431158	-0.515582	-0.94263	-1.41918	-2.31348	1.33396	1.39241	2.14547	1.34832	-1.42957	-1.92203	-2.67433
SH2D1A	318	0.0661708	0.197791	0.263962	1.00056	0.250683	0.749317	0.841585	96.1372	100.137	100.355	100.296	33.7922	8	58	4.14674e-19	6.7337	6.75216	6.14449	6.21087	5.54035	4.68197	4.50989	4.3053	4.36045	1.23371	1.25176	0.65802	0.722877	0.0677372	-0.770953	-0.939078	-1.13898	-1.08509	0.0184675	-0.589208	-0.522828	-1.19335	-2.05173	-2.2238	-2.4284	-2.37324	1.01288	-1.50442	-1.43677	-2.28683	-4.14603	-4.67123	-5.38295
TNFSF4	319	0.0155311	0.193886	0.209417	0.252284	0.0741635	0.925836	0.35673	89.3059	93.3059	93.5241	93.4648	2.69152	8	58	0.0137215	4.8642	4.83911	4.80331	4.65523	4.68256	4.96443	5.54381	5.30015	4.58893	-0.163547	-0.243144	-0.356721	-0.826505	-0.73978	0.154446	1.99257	1.21953	-1.03685	-0.0250895	-0.0608896	-0.208968	-0.181632	0.100233	0.679618	0.435954	-0.275269	-1.01754	-1.04311	-1.15586	-1.13417	1.07195	1.60172	1.3528
LILRB5	320	0.00338198	0.478854	0.482236	0.672761	0.00701312	0.992987	0.378605	138.627	142.627	142.845	142.786	4.28127	8	58	0.00043157	4.81572	4.80253	4.84487	4.67352	4.51222	5.7608	5.36659	6.34312	5.08482	-0.537199	-0.559464	-0.487967	-0.777348	-1.04976	1.05891	0.393149	2.04239	-0.0827112	-0.0131838	0.0291506	-0.142195	-0.303493	0.945079	0.550871	1.52741	0.269108	-1.00918	1.02041	-1.10358	-1.23413	1.92529	1.46497	2.88267
ITGAE	321	0.0579199	0.547117	0.605036	1.23113	0.0957296	0.90427	0.631229	150.309	154.309	154.527	154.468	10.4092	8	58	6.68359e-09	4.81572	4.80253	4.80331	4.65523	4.45425	6.19601	5.9593	7.50761	6.72886	-0.672348	-0.684469	-0.683758	-0.819906	-1.0047	0.596745	0.379103	1.80267	1.08666	-0.0131838	-0.0124098	-0.160488	-0.36147	1.3803	1.14358	2.69189	1.91314	-1.00918	-1.00864	-1.11767	-1.28473	2.60322	2.20929	6.46159
MASP2	322	0	0.127503	0.127503	0.143497	0	1	0.21916	61.4869	63.4869	63.5584	63.5664	2.03487	8	58	0.0578926	4.81572	4.80253	4.80331	4.65523	4.45425	5.05018	4.77946	5.13411	4.77636	0.039346	-0.0270515	-0.0231532	-0.76892	-1.78113	1.22018	-0.143276	1.64285	-0.158844	-0.0131838	-0.0124098	-0.160488	-0.36147	0.234464	-0.0362611	0.318388	-0.0393524	-1.00918	-1.00864	-1.11767	-1.28473	1.17647	-1.02545	1.24694
HLA-DRA	323	0.106142	0.275398	0.38154	1.68409	0.278193	0.721807	0.86942	116.072	120.072	120.29	120.231	41.6646	8	58	2.81929e-21	11.6254	11.5179	11.4609	11.5831	10.5457	9.24038	8.75157	8.54152	8.12731	0.996013	0.923203	0.884607	0.96741	0.264717	-0.619403	-0.950483	-1.09275	-1.37331	-0.107496	-0.164479	-0.0422285	-1.07968	-2.38499	-2.8738	-3.08384	-3.49806	-1.07736	-1.12076	-1.0297	-2.11357	-5.22341	-7.32991	-8.4787
IL17B	324	0.0506115	0.558466	0.609077	1.62097	0.0830953	0.916905	0.71271	151.018	155.018	155.237	155.177	15.9329	8	58	3.86101e-12	4.81572	4.80253	4.80331	4.65523	4.45425	6.63355	6.45829	8.09868	6.88541	-0.703602	-0.713703	-0.71311	-0.826556	-0.980534	0.689088	0.554815	1.81156	0.882046	-0.0131838	-0.0124098	-0.160488	-0.36147	1.81784	1.64257	3.28296	2.0697	-1.00918	-1.00864	-1.11767	-1.28473	3.52552	3.12222	9.7335
C4BPA	325	0.0104008	0.125271	0.135672	0.137147	0.0766614	0.923339	0.236289	64.072	68.072	68.2902	68.2309	1.18636	8	58	0.323057	4.81572	4.80253	4.80331	4.65523	4.45425	4.5314	4.71137	4.60204	4.47539	1.15929	1.06698	1.0724	0.0356473	-1.37151	-0.83134	0.428739	-0.336735	-1.22348	-0.0131838	-0.0124098	-0.160488	-0.36147	-0.284318	-0.104343	-0.213675	-0.340327	-1.00918	-1.00864	-1.11767	-1.28473	-1.21783	-1.07501	-1.15964
CD209	326	0	0.34679	0.34679	0.605283	0	1	0.496509	119.521	121.521	121.592	121.6	7.14946	8	58	1.53343e-06	4.81572	4.80253	4.80331	4.65523	5.22271	5.89302	6.22541	5.96913	5.50335	-0.847784	-0.869897	-0.868599	-1.11697	-0.165126	0.959199	1.51673	1.08686	0.305591	-0.0131838	-0.0124098	-0.160488	0.406993	1.0773	1.4097	1.15341	0.687629	-1.00918	-1.00864	-1.11767	1.32592	2.11009	2.65681	2.2244
TGFBI	327	0.24981	0.426195	0.676005	1.41383	0.369538	0.630462	0.761485	143.726	147.726	147.944	147.884	18.1728	8	58	2.97715e-13	7.0696	7.21937	7.4547	7.72279	7.59337	6.10123	4.73204	5.05389	4.46284	0.525195	0.639064	0.817999	1.02184	0.923434	-0.211103	-1.25215	-1.00744	-1.45684	0.14976	0.385095	0.653184	0.523763	-0.968378	-2.33756	-2.01572	-2.60677	1.10939	1.30595	1.57264	1.4377	-1.95664	-5.05448	-4.04381
SELE	328	0.00592985	0.318763	0.324693	0.412123	0.018263	0.981737	0.331067	115.62	119.62	119.838	119.778	3.27818	8	58	0.00376254	4.81572	4.80253	4.80331	4.65523	4.45425	5.42565	4.87736	5.87522	4.69116	-0.267658	-0.297648	-0.295887	-0.632732	-1.08992	1.1198	-0.127424	2.14247	-0.550992	-0.0131838	-0.0124098	-0.160488	-0.36147	0.609929	0.0616474	1.0595	-0.124555	-1.00918	-1.00864	-1.11767	-1.28473	1.52618	1.04366	2.08421
CD8B	329	0.325656	0.366689	0.692345	0.765579	0.470366	0.529634	0.623668	137.484	141.484	141.702	141.643	3.62046	8	58	0.00178134	6.81505	6.63443	6.45713	6.5095	5.65322	6.27809	5.92462	6.93425	5.83496	1.06324	0.660748	0.265668	0.382355	-1.52579	-0.133323	-0.920994	1.32888	-1.1208	-0.18062	-0.357913	-0.30555	-1.16183	-0.536961	-0.89043	0.119207	-0.980092	-1.13337	-1.28157	-1.23589	-2.23741	-1.45091	-1.85373	1.08614
MAFG	330	0.0750918	0.300012	0.375104	2.06623	0.200189	0.799811	0.882708	118.879	122.879	123.097	123.037	47.7467	8	58	9.95278e-23	5.1867	5.21831	5.53608	5.3318	6.29483	7.75803	8.47705	8.95622	8.14107	-1.01773	-0.997371	-0.792676	-0.924266	-0.303934	0.638576	1.10172	1.41038	0.885304	0.0316075	0.349386	0.145099	1.10814	2.57134	3.29035	3.76952	2.95437	1.02215	1.27402	1.10581	2.15567	5.94359	9.78348	13.6376
CTSG	331	0	0.0932926	0.0932926	0.1132	0	1	0.275759	43.3679	45.3679	45.4393	45.4473	2.76047	8	58	0.011782	4.81572	4.86214	4.80331	4.65523	4.45425	4.53594	4.40019	4.39357	4.48415	1.14847	1.39618	1.08225	0.292059	-0.780439	-0.344508	-1.06891	-1.10422	-0.620877	0.0464195	-0.0124098	-0.160488	-0.36147	-0.279778	-0.415529	-0.422145	-0.331568	1.0327	-1.00864	-1.11767	-1.28473	-1.21401	-1.33379	-1.33992
LIF	332	0.0461922	0.400414	0.446606	0.761071	0.103429	0.896571	0.56461	132.488	136.488	136.706	136.647	7.50796	8	58	8.04431e-07	4.81572	4.80253	4.80331	4.65523	4.45425	5.86689	5.51392	6.75476	5.68828	-0.595862	-0.613478	-0.612444	-0.810306	-1.07886	0.80872	0.337083	1.99508	0.57006	-0.0131838	-0.0124098	-0.160488	-0.36147	1.05118	0.698208	1.93904	0.872566	-1.00918	-1.00864	-1.11767	-1.28473	2.07222	1.62249	3.83451
EWSR1	333	0.0192112	0.109846	0.129057	0.143733	0.148858	0.851142	0.375895	59.0271	63.0271	63.2452	63.1859	2.21677	8	58	0.0390014	9.30685	9.37659	9.18035	9.27781	9.24373	9.3029	9.25131	8.61294	8.8359	0.59703	0.869905	0.102065	0.483375	0.350062	0.581569	0.37971	-2.11804	-1.24567	0.0697406	-0.126502	-0.0290476	-0.0631193	-0.0039514	-0.055542	-0.69391	-0.470952	1.04953	-1.09164	-1.02034	-1.04472	-1.00274	-1.03925	-1.61766
PPP1R12B	334	0.0096558	0.13682	0.146476	0.254937	0.0659208	0.934079	0.549092	68.751	72.751	72.9692	72.9099	7.61089	8	58	6.69967e-07	6.06483	6.10613	6.02213	5.73116	5.35234	5.16032	5.8384	5.2351	5.82046	0.990708	1.10391	0.873645	0.0760122	-0.962443	-1.48882	0.36998	-1.28381	0.320813	0.0412962	-0.0427038	-0.333675	-0.712497	-0.904516	-0.226438	-0.82973	-0.244373	1.02904	-1.03004	-1.26022	-1.63864	-1.87192	-1.16994	-1.77735
HLA-DPA1	335	0.126028	0.247639	0.373667	1.19057	0.337274	0.662726	0.834954	111.43	115.43	115.648	115.589	29.0694	8	58	1.32444e-17	10.0458	9.95189	9.8662	10.0227	9.03532	8.19828	7.68861	7.73291	7.0272	1.00794	0.929409	0.857716	0.988654	0.162581	-0.537701	-0.964103	-0.927042	-1.51746	-0.093872	-0.179566	-0.0230574	-1.01045	-1.84748	-2.35715	-2.31285	-3.01856	-1.06723	-1.13254	-1.01611	-2.01453	-3.59871	-5.12357	-4.96864
HLA-DMA	336	0.0189705	0.387867	0.406838	1.10409	0.0466291	0.953371	0.701871	128.357	132.357	132.575	132.516	16.054	8	58	3.34176e-12	8.30192	8.07747	8.19047	8.2996	6.93444	6.44661	6.22593	6.58299	5.49537	1.06217	0.851038	0.957324	1.05999	-0.224179	-0.683057	-0.89065	-0.554774	-1.57786	-0.224448	-0.111457	-0.00231738	-1.36749	-1.85531	-2.076	-1.71893	-2.80655	-1.16833	-1.08032	-1.00161	-2.58021	-3.61829	-4.21635	-3.29193
HIF1A	337	0.0236399	0.215873	0.239513	0.708465	0.0986998	0.9013	0.747422	96.4811	100.481	100.699	100.64	19.3858	8	58	8.11283e-14	8.55023	8.74942	9.20316	9.33247	9.99351	10.3657	10.4398	9.88851	10.2614	-1.54397	-1.26245	-0.621176	-0.438432	0.495827	1.02179	1.1265	0.34743	0.874478	0.199196	0.652936	0.782239	1.44329	1.81544	1.88953	1.33829	1.71121	1.14806	1.57236	1.7198	2.7194	3.51967	3.70514	2.52851
KIT	338	0.100524	0.514601	0.615125	0.704149	0.16342	0.83658	0.405245	149.061	153.061	153.279	153.22	2.59447	8	58	0.0170022	5.39101	5.91083	6.16154	5.32335	4.78935	5.49247	5.2454	5.89076	4.87706	-0.134028	0.980345	1.51782	-0.279076	-1.42386	0.0834871	-0.446183	0.937335	-1.23584	0.519814	0.770525	-0.0676593	-0.601659	0.101463	-0.145609	0.499752	-0.513953	1.43377	1.70589	-1.04801	-1.51746	1.07286	-1.1062	1.41397
NCR1	339	0.0625074	0.521881	0.584388	1.21235	0.106962	0.893038	0.644191	147.982	151.982	152.201	152.141	10.9356	8	58	3.01689e-09	5.05283	4.94775	4.89665	4.66719	4.64865	6.29473	6.22263	7.6611	6.70262	-0.57979	-0.67738	-0.724838	-0.937933	-0.955152	0.573572	0.506609	1.84253	0.952383	-0.105082	-0.156183	-0.385637	-0.404178	1.2419	1.1698	2.60827	1.64979	-1.07556	-1.11434	-1.30644	-1.32333	2.3651	2.2498	6.09773
CCND3	340	0.00607576	0.146828	0.152904	0.70843	0.0397359	0.960264	0.823393	71.7025	75.7025	75.9207	75.8614	32.3469	8	58	1.14657e-18	8.47864	8.68379	8.85737	9.11532	10.0931	10.189	10.504	10.0149	9.95567	-1.4104	-1.13869	-0.908782	-0.567148	0.727825	0.85487	1.27215	0.624309	0.545858	0.205145	0.378733	0.636677	1.61442	1.71034	2.0254	1.53626	1.47703	1.1528	1.3002	1.55474	3.06188	3.27238	4.07106	2.90042
TNFRSF17	341	0.00977874	0.193822	0.2036	0.202128	0.0480291	0.951971	0.186878	88.1834	92.1834	92.4016	92.3423	1.0078	8	58	0.440338	4.91963	4.84119	4.80974	4.65523	4.45425	4.85949	4.59899	4.70221	4.7897	1.23967	0.708056	0.494901	-0.552246	-1.91435	0.832081	-0.93339	-0.23385	0.359129	-0.078441	-0.109893	-0.264402	-0.465383	-0.0601408	-0.32064	-0.217422	-0.129926	-1.05588	-1.07915	-1.20114	-1.38068	-1.04257	-1.24888	-1.16265
TNFRSF8	342	0.00288782	0.196857	0.199745	0.281046	0.0144576	0.985542	0.392377	87.4681	91.4681	91.6863	91.627	4.44498	8	58	0.000305639	4.81572	4.80253	4.80331	4.65523	4.67878	5.14608	5.81701	5.21465	5.11163	-0.514942	-0.55081	-0.548704	-0.951563	-0.887495	0.383836	2.20916	0.570389	0.290126	-0.0131838	-0.0124098	-0.160488	-0.136939	0.330363	1.0013	0.398934	0.295918	-1.00918	-1.00864	-1.11767	-1.09957	1.25733	2.0018	1.31853
C5	343	0.00180191	0.171742	0.173544	0.17157	0.010383	0.989617	0.128682	79.3363	83.3363	83.5545	83.4952	0.907439	8	58	0.516774	4.81572	4.80253	4.80331	4.66063	4.9179	4.57755	4.52655	4.48958	4.48088	0.857943	0.777584	0.782302	-0.0873318	1.48076	-0.593744	-0.904597	-1.12994	-1.18298	-0.0131838	-0.0124098	-0.155082	0.102179	-0.238164	-0.289163	-0.326132	-0.334834	-1.00918	-1.00864	-1.11348	1.07339	-1.17949	-1.22193	-1.25365
CLEC7A	344	0.135727	0.431472	0.567199	0.819084	0.239294	0.760706	0.577174	141.065	145.065	145.283	145.224	6.15917	8	58	9.74774e-06	8.07167	8.33829	8.36252	8.95327	9.53919	9.51007	9.07349	8.27052	8.49148	-1.20494	-0.720258	-0.67621	0.397693	1.46282	1.40988	0.616243	-0.843455	-0.441772	0.26662	0.290851	0.881599	1.46752	1.4384	1.00182	0.19885	0.419814	1.20299	1.22336	1.84242	2.76546	2.7102	2.00253	1.14778
RAPGEF2	345	0.00457093	0.093872	0.0984429	0.108992	0.0464323	0.953568	0.269004	46.0618	50.0618	50.28	50.2207	1.9793	8	58	0.0652517	4.81572	4.83432	4.80331	4.65523	4.45425	4.52372	4.48391	4.69186	4.46892	1.13214	1.24986	1.05361	0.11659	-1.1552	-0.715562	-0.967468	0.348362	-1.06233	0.0186025	-0.0124098	-0.160488	-0.36147	-0.291994	-0.331802	-0.123861	-0.346794	1.01298	-1.00864	-1.11767	-1.28473	-1.22433	-1.25858	-1.08965
CXCL13	346	0.00313108	0.0786828	0.0818139	0.111046	0.0382707	0.961729	0.395681	35.4521	39.4521	39.6703	39.611	4.12523	8	58	0.000601056	4.81572	4.80253	4.80331	4.65523	4.45425	4.4456	4.25134	4.42534	4.45313	1.20268	1.13883	1.14258	0.425439	-0.547912	-0.5898	-1.53058	-0.6879	-0.553331	-0.0131838	-0.0124098	-0.160488	-0.36147	-0.370119	-0.564376	-0.390375	-0.362589	-1.00918	-1.00864	-1.11767	-1.28473	-1.29246	-1.47875	-1.31073
CD274	347	0.207088	0.724753	0.931841	3.44512	0.222235	0.777765	0.830699	170.669	174.669	174.887	174.828	30.8087	8	58	3.52392e-18	7.43468	8.10901	7.91786	10.3298	11.0676	11.5527	11.1545	9.88317	10.5008	-1.50568	-1.07133	-1.19445	0.359166	0.83438	1.14683	0.890363	0.0714513	0.469275	0.674324	0.483176	2.89517	3.63293	4.11801	3.71985	2.44849	3.06611	1.59585	1.39782	7.43929	12.4057	17.3637	13.1761	5.45844
RAG1	348	0.0199471	0.498056	0.518003	0.622818	0.0385077	0.961492	0.318067	142.49	146.49	146.708	146.649	2.77877	8	58	0.0113151	4.81572	4.80253	4.80331	4.65523	4.65667	5.7199	4.97712	5.99401	4.78837	-0.427235	-0.454323	-0.452733	-0.756986	-0.754029	1.43057	-0.095611	1.99378	-0.483426	-0.0131838	-0.0124098	-0.160488	-0.159049	0.904181	0.1614	1.17829	-0.0273477	-1.00918	-1.00864	-1.11767	-1.11655	1.87148	1.11837	2.26309
STAT1	349	0	0.321114	0.321114	1.52472	0	1	0.814923	115.059	117.059	117.131	117.139	31.9229	8	58	1.55578e-18	7.84321	8.48847	8.56184	10.5023	10.5584	10.2039	10.1403	10.1343	10.097	-1.73686	-1.10412	-1.03217	0.870637	0.925669	0.578084	0.515704	0.509793	0.473261	0.645256	0.718626	2.65907	2.71519	2.36073	2.29712	2.29109	2.25384	1.56402	1.64561	6.31627	6.56682	5.13631	4.91475	4.89426
LILRA5	350	0.213614	0.269747	0.483361	1.62981	0.441935	0.558065	0.869732	118.977	122.977	123.195	123.136	38.4327	8	58	1.97489e-20	7.3157	7.67921	7.99808	7.79266	8.64386	9.79584	10.6162	9.94371	10.2932	-1.24653	-0.960086	-0.708825	-0.870694	-0.199951	0.707802	1.35426	0.824318	1.09971	0.363516	0.682378	0.476959	1.32816	2.48014	3.30053	2.62801	2.97749	1.28656	1.60478	1.39181	2.51083	5.57953	9.85278	6.18172
RRAD	351	0.00276548	0.0722306	0.0749961	0.102609	0.036875	0.963125	0.399098	30.4245	34.4245	34.6427	34.5834	4.20908	8	58	0.000502905	4.81572	4.80253	4.80331	4.65523	4.45425	4.4456	4.25139	4.608	4.4592	1.14176	1.07556	1.07944	0.335817	-0.673484	-0.716919	-1.69223	0.0986375	-0.64859	-0.0131838	-0.0124098	-0.160488	-0.36147	-0.370119	-0.564332	-0.207717	-0.356513	-1.00918	-1.00864	-1.11767	-1.28473	-1.29246	-1.4787	-1.15486
IKBKE	352	0.0301064	0.2179	0.248006	0.628705	0.121394	0.878606	0.714836	97.8352	101.835	102.053	101.994	15.5675	8	58	5.99419e-12	5.2313	5.27576	5.22825	4.80575	4.53591	6.06374	6.54582	6.6471	6.1353	-0.494479	-0.436061	-0.498486	-1.05359	-1.40812	0.599219	1.2326	1.36567	0.693246	0.0444634	-0.00304977	-0.425547	-0.695391	0.832435	1.31451	1.41579	0.904001	1.0313	-1.00212	-1.34308	-1.61932	1.78069	2.48719	2.66807
GPI	353	0.0427769	0.0529238	0.0957007	0.106433	0.446986	0.553014	0.608748	24.6403	28.6403	28.8585	28.7992	2.64682	8	58	0.0151457	8.49487	8.36724	8.43718	8.39494	8.43667	8.41182	8.72907	8.76551	9.01029	-0.297113	-0.871868	-0.556906	-0.747114	-0.559189	-0.67112	0.757589	0.921692	2.02403	-0.127627	-0.0576884	-0.099925	-0.0581953	-0.0830501	0.234202	0.270642	0.515422	-1.0925	-1.0408	-1.07172	-1.04116	-1.05926	1.17626	1.20634
FCGR3	354	0.209035	0.337662	0.546697	0.737215	0.38236	0.61764	0.637973	130.537	134.537	134.756	134.696	6.48563	8	58	5.23908e-06	8.69514	9.03963	8.81301	9.37187	10.1722	9.65465	9.59915	8.82509	8.10418	-0.719414	-0.16439	-0.529505	0.370895	1.66041	0.826498	0.73707	-0.510039	-1.67153	0.344493	0.117873	0.676734	1.47711	0.959519	0.904013	0.129955	-0.590959	1.2697	1.08513	1.59852	2.78391	1.94466	1.87126	1.09426
NEFL	355	0.0149631	0.194458	0.209421	0.260635	0.0714498	0.92855	0.374748	89.3674	93.3674	93.5856	93.5263	3.18595	8	58	0.00460789	4.81572	4.80253	4.80331	4.65523	4.45425	4.91728	4.75088	5.76219	4.52241	-0.041698	-0.0764577	-0.0744169	-0.464832	-0.994729	0.226065	-0.212633	2.45372	-0.81502	-0.0131838	-0.0124098	-0.160488	-0.36147	0.101558	-0.0648332	0.946474	-0.293309	-1.00918	-1.00864	-1.11767	-1.28473	1.07293	-1.04596	1.92716
LTK	356	0	0.0885689	0.0885689	0.11288	0	1	0.31048	40.3542	42.3542	42.4256	42.4336	3.26457	8	58	0.00387672	4.81572	4.80253	4.80331	4.65523	4.65876	4.4456	4.25284	4.43153	4.48415	1.10436	1.03857	1.04243	0.303505	0.321127	-0.742574	-1.70446	-0.812749	-0.550204	-0.0131838	-0.0124098	-0.160488	-0.156957	-0.370119	-0.562877	-0.384182	-0.331568	-1.00918	-1.00864	-1.11767	-1.11493	-1.29246	-1.47721	-1.30512
IL10RB	357	0.107634	0.16464	0.272274	0.857417	0.395315	0.604685	0.848377	89.1964	93.1964	93.4145	93.3552	31.911	8	58	1.56925e-18	8.64615	8.91168	9.04635	9.2498	10.2654	10.6001	10.7533	10.199	10.1144	-1.40194	-1.06593	-0.895517	-0.638063	0.647118	1.0707	1.26456	0.563037	0.456039	0.26553	0.400199	0.60365	1.61925	1.95398	2.10718	1.55281	1.46825	1.20208	1.31969	1.51956	3.07216	3.87443	4.30849	2.93388
TGFBR2	358	0.0234378	0.217866	0.241303	0.426468	0.0971299	0.90287	0.576295	96.9558	100.956	101.174	101.115	8.29795	8	58	2.02792e-07	9.00743	9.14366	9.36386	9.24913	10.1438	9.99822	10.1456	9.05135	8.77682	-0.80568	-0.546623	-0.127855	-0.346041	1.35542	1.0785	1.35869	-0.722158	-1.24424	0.136224	0.356431	0.241699	1.1364	0.990786	1.13812	0.0439194	-0.230617	1.09902	1.28026	1.18238	2.19832	1.98727	2.20094	1.03091
LILRA6	359	0.0571199	0.562259	0.619379	1.13805	0.0922211	0.907779	0.589492	151.761	155.761	155.979	155.92	8.64219	8	58	1.13273e-07	4.81572	4.80253	4.80331	4.65523	4.45425	6.17142	5.78429	7.33268	5.7108	-0.612948	-0.626965	-0.626142	-0.783574	-0.997252	0.828389	0.416807	2.06301	0.338677	-0.0131838	-0.0124098	-0.160488	-0.36147	1.3557	0.968572	2.51696	0.895084	-1.00918	-1.00864	-1.11767	-1.28473	2.55921	1.9569	5.72375
JAK3	360	0.00530156	0.26753	0.272832	1.12743	0.0194316	0.980568	0.794962	105.517	109.517	109.735	109.676	27.2733	8	58	5.55249e-17	5.16689	5.07895	4.97641	4.72937	4.76875	6.59175	7.15342	7.57463	6.6597	-0.612039	-0.690199	-0.781334	-1.00089	-0.965896	0.654307	1.1535	1.52785	0.714698	-0.0879431	-0.190485	-0.437525	-0.398149	1.42485	1.98653	2.40774	1.4928	-1.06285	-1.14115	-1.35428	-1.31782	2.68487	3.96283	5.30641
HMGB2	361	0.0064825	0.114009	0.120492	0.143979	0.0538002	0.9462	0.330651	57.659	61.659	61.8771	61.8178	2.77654	8	58	0.0113709	8.36756	8.40007	8.34485	8.23272	8.02556	8.54199	8.69821	8.1779	9.01303	-0.185243	-0.0754971	-0.261902	-0.640448	-1.33978	0.403625	0.930999	-0.82551	1.99376	0.0325092	-0.022708	-0.134842	-0.341999	0.174435	0.330655	-0.189661	0.645467	1.02279	-1.01586	-1.09797	-1.26751	1.12852	1.25758	-1.1405
TGFBR1	362	0.0507276	0.190325	0.241053	0.631444	0.210442	0.789558	0.756956	92.7809	96.7809	96.9991	96.9398	18.1071	8	58	3.2e-13	9.19625	9.42651	9.82409	9.0078	8.29608	7.94489	8.35728	7.78051	8.08015	0.744477	1.06241	1.61136	0.484279	-0.498428	-0.983328	-0.413923	-1.21029	-0.796566	0.230266	0.627843	-0.188448	-0.900174	-1.25136	-0.838971	-1.41574	-1.1161	1.17305	1.54525	-1.13954	-1.86629	-2.38066	-1.78877	-2.66796
IL18R1	363	0.138246	0.610053	0.7483	2.65153	0.184747	0.815253	0.813599	159.585	163.585	163.803	163.743	27.8913	8	58	3.36404e-17	5.60067	5.78311	5.86659	5.68292	7.82664	8.7841	9.14103	8.50365	9.30643	-1.09993	-0.987679	-0.936315	-1.04932	0.269676	0.858785	1.0784	0.68623	1.18016	0.182441	0.265922	0.0822537	2.22598	3.18344	3.54036	2.90299	3.70576	1.1348	1.2024	1.05867	4.67828	9.08468	11.6347	7.47974
LTF	364	1.18842	1.05985	2.24827	3.31809	0.528591	0.471409	0.749804	200.495	204.495	204.713	204.654	12.9989	8	58	1.60913e-10	5.98294	6.11806	6.20061	6.66557	7.95358	8.84883	9.5491	8.77307	7.12956	-1.10122	-1.0011	-0.939927	-0.595379	0.359055	1.02245	1.54136	0.966314	-0.25156	0.135115	0.217665	0.682631	1.97064	2.86589	3.56616	2.79013	1.14661	1.09818	1.16285	1.60506	3.91941	7.28985	11.8446	6.91692
IL2	365	0.0149437	0.30128	0.316224	0.394282	0.0472566	0.952743	0.351763	113.733	117.733	117.951	117.892	3.23343	8	58	0.00415117	4.81572	4.80253	4.80331	4.65523	5.32718	5.44461	5.65647	5.46074	5.08437	-0.825634	-0.861801	-0.859678	-1.2659	0.577434	0.899596	1.48078	0.943834	-0.0886362	-0.0131838	-0.0124098	-0.160488	0.511459	0.628897	0.840755	0.645023	0.268657	-1.00918	-1.00864	-1.11767	1.42549	1.54638	1.79099	1.56376
ALOX15	366	0.620208	0.535186	1.15539	1.53559	0.536793	0.463207	0.727118	161.073	165.073	165.291	165.232	5.57221	8	58	3.06213e-05	7.23375	7.3715	6.73096	7.73101	7.46807	6.55396	5.74352	5.92711	6.18415	0.642236	0.83365	-0.0564084	1.33322	0.967836	-0.302368	-1.42851	-1.17341	-0.816236	0.137752	-0.502782	0.497266	0.234319	-0.679788	-1.49022	-1.30664	-1.0496	1.10019	-1.41694	1.41154	1.17635	-1.6019	-2.80932	-2.47365
CCL19	367	0	0.295674	0.295674	1.40244	0	1	0.814726	110.272	112.272	112.343	112.351	31.8813	8	58	1.60336e-18	4.81572	4.80253	4.80331	4.65523	5.98541	7.0789	7.21604	7.35071	6.88417	-0.957999	-0.969088	-0.968437	-1.09299	0.025857	0.94562	1.06097	1.17424	0.781824	-0.0131838	-0.0124098	-0.160488	1.16969	2.26319	2.40033	2.53499	2.06845	-1.00918	-1.00864	-1.11767	2.24964	4.80051	5.27922	5.79573
CARD9	368	0.0563767	0.120913	0.17729	0.416705	0.317991	0.682009	0.769322	69.3612	73.3612	73.5794	73.5201	17.441	8	58	6.71288e-13	6.57456	6.60488	6.91469	6.86293	7.46456	7.75892	7.83742	7.7649	7.86361	-1.31117	-1.25592	-0.69134	-0.78565	0.310729	0.847157	0.99021	0.858048	1.03794	0.0303182	0.340127	0.288375	0.890004	1.18437	1.26286	1.19034	1.28905	1.02124	1.26587	1.22126	1.85318	2.27263	2.39972	2.28207
S100A8	369	0.388069	0.704214	1.09228	6.26227	0.355282	0.644718	0.910915	172.498	176.498	176.716	176.657	65.2489	8	58	3.6579e-26	11.5756	12.4745	13.2526	13.2528	15.9361	17.2703	17.7643	17.2524	18.1201	-1.42193	-1.07035	-0.765997	-0.76593	0.283612	0.8055	0.998704	0.798499	1.13789	0.898867	1.67698	1.67715	4.36043	5.6947	6.18865	5.6768	6.54449	1.8646	3.19757	3.19795	20.5409	51.7934	72.9405	51.1548
DEFB103A	370	0.0079787	0.16648	0.174459	0.187317	0.0457339	0.954266	0.245369	79.2613	83.2613	83.4795	83.4202	1.67313	8	58	0.124583	4.81572	4.80253	4.80331	4.65523	4.45425	5.07745	4.62487	5.08408	4.87698	0.079839	0.0154165	0.0191989	-0.704384	-1.68648	1.35878	-0.852755	1.39117	0.379209	-0.0131838	-0.0124098	-0.160488	-0.36147	0.26173	-0.190851	0.268359	0.0612649	-1.00918	-1.00864	-1.11767	-1.28473	1.19892	-1.14144	1.20444
TPSAB1	371	0.0155611	0.20141	0.216971	0.296771	0.0717198	0.92828	0.431318	91.4156	95.4156	95.6338	95.5745	4.33143	8	58	0.000388165	4.81572	4.80253	4.80331	4.65523	4.45425	5.24196	4.99438	5.86712	5.11715	-0.382041	-0.414186	-0.412299	-0.773343	-1.26338	0.657235	0.0535877	2.1815	0.352924	-0.0131838	-0.0124098	-0.160488	-0.36147	0.426247	0.178668	1.05141	0.301438	-1.00918	-1.00864	-1.11767	-1.28473	1.34373	1.13184	2.07255
CD81	372	0.0663986	0.112874	0.179273	0.687541	0.370377	0.629623	0.870111	66.6863	70.6863	70.9045	70.8452	40.8655	8	58	4.50765e-21	8.75344	8.77789	8.76045	8.95588	9.41669	10.2794	10.8231	10.3363	10.7468	-1.00725	-0.979788	-0.999385	-0.779823	-0.262107	0.707156	1.31791	0.771078	1.23221	0.0244454	0.00700252	0.202433	0.663248	1.52598	2.06961	1.58288	1.99333	1.01709	1.00487	1.15064	1.58364	2.87983	4.19773	2.99567
KIR3DS1	373	0.122789	0.927309	1.0501	2.18061	0.116931	0.883069	0.649632	181.678	185.678	185.896	185.837	11.1915	8	58	2.06458e-09	4.85492	4.87769	4.92639	4.71336	4.85393	7.09261	6.89464	8.19492	7.37663	-0.808257	-0.791844	-0.756737	-0.910309	-0.808972	0.804861	0.662148	1.5995	1.00961	0.0227676	0.0714676	-0.141564	-0.000992896	2.23769	2.03972	3.34	2.52171	1.01591	1.05079	-1.1031	-1.00069	4.71641	4.11165	10.1261
IL5	374	0	0.128047	0.128047	0.117363	0	1	0.0412096	61.7341	63.7341	63.8056	63.8136	0.311611	8	58	0.958637	4.81572	4.80253	4.80331	4.65523	4.64865	4.6961	4.72921	4.66311	4.72574	1.33315	1.13587	1.14746	-1.06829	-1.1667	-0.456694	0.0387881	-0.950344	-0.0132307	-0.0131838	-0.0124098	-0.160488	-0.167065	-0.119615	-0.0865019	-0.152606	-0.0899783	-1.00918	-1.00864	-1.11767	-1.12277	-1.08644	-1.06179	-1.11158
PTGER2	375	0.0416481	0.352099	0.393747	1.82177	0.105774	0.894226	0.840184	125.115	129.115	129.333	129.274	34.5825	8	58	2.41291e-19	4.81572	4.80253	4.80331	4.81655	5.46918	7.11671	7.84736	8.05721	6.97804	-0.900166	-0.909563	-0.909012	-0.899571	-0.434356	0.740064	1.2609	1.41049	0.641215	-0.0131838	-0.0124098	0.000833645	0.653458	2.30099	3.03164	3.24149	2.16232	-1.00918	-1.00864	1.00058	1.57293	4.92795	8.17739	9.45772
CD48	376	0.0257516	0.126019	0.15177	0.23876	0.169675	0.830325	0.57105	67.6521	71.6521	71.8702	71.8109	6.88789	8	58	2.47511e-06	11.5711	11.6469	11.6821	11.5873	12.1383	12.3875	12.3519	11.6674	11.8262	-0.916323	-0.68657	-0.579797	-0.867199	0.804283	1.56025	1.45235	-0.624389	-0.142607	0.0757309	0.110926	0.0161922	0.567146	0.816327	0.780763	0.0962272	0.255032	1.05389	1.07992	1.01129	1.48159	1.76092	1.71804	1.06897
MEF2D	377	0	0.168353	0.168353	0.194218	0	1	0.238244	77.6065	79.6065	79.6779	79.6859	2.26749	8	58	0.0349085	5.8594	5.8586	6.06165	5.78538	5.66529	6.12064	6.37467	5.56736	5.61882	-0.0745831	-0.0776018	0.691545	-0.354992	-0.809897	0.915008	1.87734	-1.18089	-0.985929	-0.000796878	0.202244	-0.0740228	-0.194109	0.261234	0.515273	-0.292046	-0.240579	-1.00055	1.15049	-1.05265	-1.14402	1.1985	1.42926	-1.22438
TNFSF14	378	0.0749082	0.289047	0.363955	0.827297	0.205817	0.794183	0.718046	116.883	120.883	121.101	121.042	15.0672	8	58	1.10648e-11	5.2954	5.72263	6.06155	5.05473	6.18864	6.75046	7.10966	7.38782	6.08198	-1.1315	-0.587277	-0.155537	-1.43808	0.00635623	0.722031	1.1796	1.53393	-0.129518	0.427228	0.766153	-0.240671	0.893243	1.45506	1.81426	2.09242	0.786579	1.34465	1.70073	-1.18154	1.85735	2.74169	3.51679	4.26464
CD58	379	0.00188346	0.0849372	0.0868207	0.0946215	0.0216937	0.978306	0.225696	39.0869	43.0869	43.3051	43.2458	1.78744	8	58	0.0981404	9.14247	9.27254	9.34723	9.16067	9.21995	9.41485	9.54219	9.05295	9.239	-0.822691	0.045215	0.543616	-0.701265	-0.305708	0.994834	1.84455	-1.42001	-0.178545	0.130068	0.204761	0.0181975	0.0774774	0.272382	0.399725	-0.0895168	0.0965345	1.09435	1.1525	1.01269	1.05517	1.2078	1.31926	-1.06401
C1S	380	0.0131341	0.134058	0.147193	0.14487	0.089231	0.910769	0.230234	68.4935	72.4935	72.7117	72.6524	0.997307	8	58	0.448003	4.81572	4.80253	4.80331	4.65523	4.45425	4.63511	4.85066	4.69018	4.48801	0.879838	0.788778	0.794124	-0.228646	-1.61682	-0.367596	1.12117	0.0127636	-1.38361	-0.0131838	-0.0124098	-0.160488	-0.36147	-0.180605	0.0349407	-0.125536	-0.327706	-1.00918	-1.00864	-1.11767	-1.28473	-1.13336	1.02451	-1.09091
CD247	381	0.10803	0.1068	0.214829	0.667634	0.502863	0.497137	0.874536	66.7428	70.7428	70.961	70.9017	39.5938	8	58	9.66643e-21	8.01513	7.80707	7.56018	7.44854	6.86295	6.33621	6.2649	6.20351	5.22181	1.25427	1.02878	0.761214	0.640221	0.00557107	-0.565297	-0.642581	-0.709121	-1.77306	-0.208061	-0.454944	-0.566584	-1.15218	-1.67891	-1.75022	-1.81162	-2.79331	-1.15513	-1.37073	-1.48101	-2.22249	-3.20187	-3.36411	-3.51037
LILRB2	382	0.0901265	0.140633	0.230759	0.868599	0.390565	0.609435	0.872108	79.9381	83.9381	84.1563	84.097	36.8536	8	58	5.37175e-20	7.29453	7.33523	7.45952	7.7578	8.33629	9.05964	9.46418	9.12103	8.73618	-1.16943	-1.12137	-0.974614	-0.62241	0.0606419	0.914743	1.3924	0.987223	0.532813	0.0407038	0.164992	0.463279	1.04177	1.76512	2.16965	1.8265	1.44165	1.02862	1.12116	1.37867	2.05875	3.39902	4.49914	3.54676
NFIL3	383	0.03735	0.583625	0.620975	1.90073	0.0601473	0.939853	0.741297	152.644	156.644	156.862	156.803	19.3244	8	58	8.65281e-14	7.85176	7.59664	8.51267	8.88319	10.2103	10.7907	10.5301	8.90687	9.30994	-1.16364	-1.38766	-0.583292	-0.257927	0.907464	1.41712	1.18826	-0.237134	0.116809	-0.25512	0.660903	1.03143	2.35858	2.93898	2.67836	1.05511	1.45818	-1.19344	1.58107	2.04405	5.12866	7.66871	6.40126	2.07788
ABCB1	384	0.0408212	0.269543	0.310364	0.376191	0.131527	0.868473	0.4122	110.518	114.518	114.736	114.677	3.24193	8	58	0.0040743	5.02494	5.15926	5.21724	4.98133	5.69733	5.76362	5.19172	5.90917	4.78893	-0.713744	-0.369856	-0.221418	-0.825385	1.00768	1.1774	-0.286745	1.55003	-1.31795	0.134324	0.192304	-0.0436071	0.672392	0.738686	0.166787	0.884236	-0.236006	1.09758	1.14259	-1.03069	1.59371	1.66866	1.12256	1.84579
IL11RA	385	0.178111	0.388991	0.567102	1.05366	0.314072	0.685928	0.70639	137.033	141.033	141.251	141.192	11.9706	8	58	6.6929e-10	5.66298	5.60185	5.48443	5.49484	5.36401	6.88422	6.80029	8.07212	7.04389	-0.630443	-0.694182	-0.816609	-0.805756	-0.94217	0.6429	0.555387	1.88149	0.809388	-0.061131	-0.178549	-0.168139	-0.298972	1.22124	1.13731	2.40915	1.38092	-1.04328	-1.13174	-1.12361	-1.23027	2.33147	2.1997	5.3116
TNFSF10	386	0.0796595	0.462661	0.54232	2.53468	0.146886	0.853114	0.850864	142.362	146.362	146.58	146.521	36.704	8	58	5.91683e-20	6.57473	6.94528	6.88722	8.29032	9.89151	10.1894	9.40734	9.28615	8.46262	-1.36166	-1.09075	-1.1332	-0.107366	1.06329	1.28108	0.709308	0.620701	0.018604	0.370548	0.312486	1.71559	3.31678	3.61466	2.83261	2.71142	1.88789	1.29284	1.24185	3.28431	9.96435	12.2496	7.12362	6.54965
CCL24	387	0	0.217883	0.217883	0.224456	0	1	0.146946	92.5646	94.5646	94.636	94.644	1.24888	8	58	0.288055	5.02084	5.15509	5.09961	5.08924	5.27486	5.52508	5.30451	5.05395	4.48415	-0.321373	0.152288	-0.0434543	-0.0800267	0.574878	1.45774	0.679507	-0.204569	-2.21499	0.134246	0.0787683	0.0684029	0.254017	0.504239	0.283671	0.0331049	-0.536692	1.09752	1.05612	1.04856	1.19252	1.41838	1.21729	1.02321
IL1RAP	388	0.187635	0.482146	0.669781	1.90367	0.280144	0.719856	0.797806	148.605	152.605	152.823	152.764	23.4946	8	58	1.45555e-15	9.25404	9.46698	10.0164	10.0377	11.9082	12.1139	12.1036	11.1555	11.2989	-1.37179	-1.18493	-0.702767	-0.684073	0.95731	1.1379	1.12884	0.296803	0.422706	0.212939	0.762381	0.783684	2.65411	2.8599	2.84958	1.90143	2.04491	1.15905	1.69629	1.72152	6.29458	7.25963	7.20789	3.73584
CD99	389	0.171699	0.0780308	0.24973	0.303522	0.687539	0.312461	0.799888	53.5539	57.5539	57.772	57.7127	9.03828	8	58	5.87152e-08	9.38044	9.38686	9.28909	9.49187	9.16547	8.73692	8.74894	8.8424	8.24885	0.84457	0.86015	0.62296	1.11492	0.32305	-0.716657	-0.687503	-0.460741	-1.90074	0.00642181	-0.091345	0.111433	-0.214964	-0.643519	-0.631502	-0.538033	-1.13158	1.00446	-1.06536	1.0803	-1.16067	-1.56213	-1.54918	-1.45199
TLR5	390	0.0514143	0.418837	0.470251	1.45072	0.109334	0.890666	0.761552	135.31	139.31	139.528	139.469	20.3966	8	58	2.86376e-14	6.16845	6.63321	7.01971	7.44177	8.96932	8.50791	8.51302	8.01102	7.2363	-1.52302	-1.0324	-0.624396	-0.178853	1.43371	0.946614	0.952017	0.422082	-0.395747	0.464757	0.851256	1.27331	2.80087	2.33945	2.34457	1.84257	1.06785	1.38008	1.80407	2.41716	6.96861	5.06111	5.0791	3.58649
SOCS3	391	0.134595	0.63113	0.765725	3.41439	0.175775	0.824225	0.849971	161.283	165.283	165.501	165.441	36.7155	8	58	5.87301e-20	5.74981	6.11757	6.46516	7.55541	9.91331	9.58071	9.35802	9.21161	8.63373	-1.42914	-1.20213	-0.987573	-0.314586	1.1409	0.935595	0.798132	0.707758	0.351046	0.36776	0.715346	1.80559	4.16349	3.83089	3.6082	3.4618	2.88392	1.29035	1.64188	3.49572	17.9199	14.2303	12.1949	11.018
CLEC6A	392	0.119571	0.159305	0.278876	0.530215	0.42876	0.57124	0.763316	88.1072	92.1072	92.3254	92.2661	16.7196	8	58	1.53021e-12	5.28822	5.24554	5.441	5.29285	6.00488	6.66472	6.65101	6.38684	6.08806	-1.02462	-1.09659	-0.767013	-1.01682	0.183751	1.29631	1.2732	0.827779	0.324	-0.0426856	0.152781	0.00462782	0.71666	1.37649	1.36279	1.09862	0.799839	-1.03003	1.11171	1.00321	1.64337	2.59637	2.57182	2.1415
HMGN1	393	0.0327089	0.141248	0.173956	0.183003	0.188029	0.811971	0.375088	74.8271	78.8271	79.0453	78.986	1.88136	8	58	0.0804529	9.39718	9.47366	9.45492	9.20129	9.42952	9.74736	9.67733	9.78124	9.99782	-0.720337	-0.407663	-0.484259	-1.52124	-0.588098	0.711352	0.425025	0.849866	1.73535	0.0764774	0.0577427	-0.195893	0.0323445	0.350179	0.280146	0.384058	0.600641	1.05444	1.04084	-1.14543	1.02267	1.27472	1.21432	1.30501
CD79B	394	0.00200772	0.120629	0.122636	0.19761	0.0163714	0.983629	0.471274	59.1617	63.1617	63.3798	63.3205	6.12962	8	58	1.03169e-05	6.80077	6.64927	6.4581	6.29792	6.38565	7.05964	7.17047	7.11569	6.32077	0.298306	-0.130451	-0.67147	-1.12479	-0.876531	1.03092	1.3446	1.18955	-1.06013	-0.1515	-0.342667	-0.502847	-0.415124	0.258866	0.369705	0.314917	-0.479998	-1.11072	-1.2681	-1.41701	-1.33341	1.19654	1.29209	1.24394
FCGR1A	395	0.376743	1.09198	1.46872	4.81244	0.256511	0.743489	0.818309	195.39	199.39	199.608	199.549	27.8946	8	58	3.35509e-17	4.99504	5.43022	5.49282	6.91149	8.60474	9.85244	9.66048	8.56036	9.62869	-1.34942	-1.13086	-1.09942	-0.386892	0.463538	1.0902	0.993784	0.441248	0.977818	0.435176	0.497775	1.91644	3.60969	4.8574	4.66544	3.56531	4.63365	1.35208	1.41203	3.77491	12.2075	28.9883	25.3768	11.8377
GRB2	396	0	0.102644	0.102644	0.306887	0	1	0.706072	48.9086	50.9086	50.98	50.988	17.4159	8	58	6.90533e-13	8.487	8.6374	8.87999	8.97259	9.4316	9.65593	9.76906	9.34717	8.82828	-1.37451	-1.04381	-0.510398	-0.306784	0.702493	1.19576	1.4445	0.516851	-0.624102	0.150399	0.39299	0.485591	0.944601	1.16893	1.28206	0.860172	0.341278	1.10988	1.31311	1.40016	1.92466	2.24845	2.43186	1.81526
CCR4	397	0.179718	0.11989	0.299608	0.514506	0.599845	0.400155	0.818051	75.9489	79.9489	80.1671	80.1078	20.5478	8	58	2.45844e-14	7.30697	7.49523	7.19296	7.20942	7.03628	6.46221	6.21872	5.89104	4.49313	0.750031	0.946843	0.630834	0.648042	0.467038	-0.133129	-0.387683	-0.730264	-2.19171	0.188256	-0.114014	-0.0975545	-0.270689	-0.844761	-1.08825	-1.41593	-2.81384	1.13939	-1.08224	-1.06996	-1.20638	-1.79597	-2.12616	-2.66832
NOD2	398	0.0184184	0.141887	0.160305	0.55268	0.114896	0.885104	0.788348	72.7258	76.7258	76.944	76.8847	24.3998	8	58	6.43499e-16	6.8787	7.32103	7.55971	7.657	8.41774	8.55313	8.50572	8.36313	8.27542	-1.76101	-1.03251	-0.639418	-0.479191	0.773717	0.996693	0.91861	0.683773	0.539331	0.442333	0.681009	0.778296	1.53904	1.67443	1.62702	1.48443	1.39673	1.3588	1.60326	1.7151	2.90601	3.19193	3.08874	2.79806
IL6ST	399	0.0975451	0.120816	0.218361	0.324724	0.446715	0.553285	0.70725	72.5076	76.5076	76.7258	76.6665	10.2153	8	58	9.00604e-09	8.12674	8.07144	8.08944	8.0943	8.61703	8.90066	9.09242	8.96069	8.31355	-0.82366	-0.954806	-0.91213	-0.9006	0.33916	1.01184	1.46663	1.15419	-0.380619	-0.0552967	-0.0373024	-0.032441	0.490294	0.773923	0.965682	0.833945	0.186805	-1.03907	-1.02619	-1.02274	1.40473	1.70991	1.95299	1.78255
BAX	400	0.00919544	0.0812423	0.0904377	0.301729	0.101677	0.898323	0.777044	39.91	43.91	44.1281	44.0688	21.6294	8	58	8.43778e-15	7.98352	8.01529	7.99707	7.93284	7.96694	8.59521	9.21744	9.24227	8.88593	-0.786501	-0.730067	-0.762447	-0.876526	-0.815968	0.300078	1.4054	1.44951	0.816516	0.0317689	0.0135412	-0.0506792	-0.0165883	0.611682	1.23392	1.25875	0.902407	1.02226	1.00943	-1.03575	-1.01156	1.52804	2.35204	2.39288
ROCK2	401	0.0108006	0.169342	0.180142	0.660497	0.0599562	0.940044	0.783965	80.8698	84.8698	85.088	85.0287	24.5891	8	58	5.44017e-16	6.87689	6.95532	6.93907	7.55385	8.79527	8.35911	8.14697	7.90442	7.75227	-1.20582	-1.09066	-1.11453	-0.211851	1.61093	0.970516	0.659035	0.302889	0.0794949	0.0784275	0.0621706	0.676952	1.91838	1.48221	1.27008	1.02752	0.875376	1.05587	1.04404	1.59876	3.77997	2.79377	2.41174	2.03852
ISG20	402	0.012434	0.272675	0.285109	2.65209	0.0436115	0.956388	0.912594	107.783	111.783	112.001	111.942	72.5694	8	58	2.31429e-27	7.34129	7.50928	7.63732	9.83845	10.7727	10.9512	10.5968	10.1014	9.84721	-1.39053	-1.27704	-1.19054	0.296548	0.927705	1.04836	0.808859	0.474178	0.302464	0.167989	0.296028	2.49716	3.43138	3.60996	3.25547	2.76008	2.50592	1.12349	1.22776	5.64573	10.7882	12.2097	9.54976	6.77435
CCL7	403	0.00542647	0.550337	0.555763	1.93705	0.00976399	0.990236	0.752565	146.846	150.846	151.064	151.005	21.6974	8	58	7.89896e-15	4.96171	5.04292	5.05824	5.36366	6.1877	8.157	7.59328	7.42412	6.08775	-1.0114	-0.94552	-0.933091	-0.685329	-0.0168601	1.58065	1.12336	0.986135	-0.0979447	0.0812108	0.096533	0.401957	1.226	3.1953	2.63158	2.46242	1.12604	1.05791	1.0692	1.3213	2.33917	9.15967	6.19704	5.5114
MIF	404	0.0211139	0.210664	0.231778	0.464055	0.0910956	0.908904	0.622642	94.7797	98.7797	98.9978	98.9386	10.1222	8	58	1.04036e-08	6.87767	6.91524	6.76198	6.74115	6.92257	7.40454	7.8839	8.65262	7.62363	-0.666346	-0.608337	-0.844965	-0.877121	-0.597012	0.147111	0.887224	2.07408	0.48537	0.0375719	-0.11569	-0.136518	0.0449068	0.526871	1.00624	1.77495	0.745959	1.02638	-1.08349	-1.09925	1.03162	1.4408	2.00866	3.42227
JAK1	405	0	0.104269	0.104269	0.139963	0	1	0.345327	49.8192	51.8192	51.8906	51.8986	3.82423	8	58	0.00114591	9.85549	9.91552	9.95022	10.1043	9.9925	9.73475	9.67549	9.17315	9.3214	0.346407	0.538018	0.648813	1.14051	0.783763	-0.0390081	-0.228207	-1.83175	-1.35854	0.0600244	0.0947326	0.248761	0.137007	-0.120736	-0.180005	-0.682336	-0.534096	1.04248	1.06787	1.18819	1.09962	-1.08729	-1.13289	-1.60474
IL29	406	0.118104	0.16898	0.287084	0.517372	0.411392	0.588608	0.7424	91.1008	95.1008	95.319	95.2597	14.5433	8	58	2.13182e-11	5.54046	5.74591	5.66557	5.97808	6.48315	6.87078	6.56736	7.21721	6.6346	-1.29042	-0.941537	-1.07797	-0.547263	0.310422	0.968698	0.453441	1.557	0.567624	0.205448	0.125109	0.437622	0.942682	1.33032	1.0269	1.67675	1.09414	1.15304	1.09059	1.35437	1.9221	2.51458	2.03764	3.19707
IL33	407	0	0.199456	0.199456	0.202343	0	1	0.133751	87.4393	89.4393	89.5107	89.5187	1.11942	8	58	0.36404	4.81572	4.80253	4.80331	4.90641	4.67878	5.15611	5.02973	4.53529	4.48415	0.0663596	0.00552198	0.00909385	0.484876	-0.565556	1.63712	1.05395	-1.22767	-1.46369	-0.0131838	-0.0124098	0.0906944	-0.136939	0.340391	0.214014	-0.280422	-0.331568	-1.00918	-1.00864	1.06488	-1.09957	1.2661	1.15991	-1.21455
LILRA2	408	0.177327	0.128058	0.305384	1.23157	0.580667	0.419333	0.918746	79.2605	83.2605	83.4787	83.4194	63.1823	8	58	8.38221e-26	8.6002	8.8055	9.12478	9.09511	10.2052	10.9497	11.2094	10.9703	10.6015	-1.29861	-1.10129	-0.79441	-0.822931	0.244014	0.959597	1.20919	0.979455	0.624991	0.205295	0.52458	0.494906	1.60497	2.34947	2.60915	2.37013	2.00134	1.15292	1.43851	1.40923	3.0419	5.09638	6.10145	5.16989
CD27	409	0.0398179	0.0931309	0.132949	0.678156	0.299498	0.700502	0.890611	53.7444	57.7444	57.9625	57.9032	51.083	8	58	1.84942e-23	7.83218	7.80025	7.37846	7.30221	6.7091	6.32729	5.87844	5.75172	5.10913	1.18924	1.15638	0.722331	0.643861	0.033519	-0.359393	-0.82129	-0.951689	-1.61296	-0.0319266	-0.45372	-0.529973	-1.12308	-1.50489	-1.95374	-2.08046	-2.72305	-1.02238	-1.36957	-1.4439	-2.17811	-2.83803	-3.87377	-4.22941
ICAM2	410	0.0117038	0.138994	0.150698	0.163191	0.0776641	0.922336	0.288164	70.1408	74.1408	74.359	74.2997	1.70491	8	58	0.116636	8.48873	8.57667	8.57823	8.71138	8.70917	8.51608	8.16489	8.58086	7.79728	0.10358	0.401354	0.406627	0.857513	0.850027	0.196188	-0.993027	0.415529	-2.23779	0.0879378	0.0894949	0.222649	0.220439	0.0273486	-0.323847	0.0921237	-0.691448	1.06285	1.064	1.16687	1.16509	1.01914	-1.25166	1.06594
IRAK2	411	0.0646035	0.164803	0.229407	0.897192	0.281611	0.718389	0.853383	86.3812	90.3812	90.5994	90.5401	35.2011	8	58	1.59027e-19	5.84229	5.74338	5.72503	6.2082	7.21388	7.76714	7.80063	7.35447	6.86076	-1.02611	-1.14122	-1.16258	-0.600262	0.570151	1.21404	1.25302	0.733773	0.159192	-0.0989106	-0.117266	0.36591	1.37159	1.92485	1.95834	1.51218	1.01847	-1.07096	-1.08468	1.28869	2.58755	3.79697	3.88614	2.8524
IFNAR1	412	0.0441897	0.214617	0.258807	0.375597	0.170744	0.829256	0.535726	98.5659	102.566	102.784	102.725	5.55409	8	58	3.1741e-05	7.22937	7.53241	7.61933	7.69977	8.35653	8.03947	7.8959	7.20632	7.13808	-0.98349	-0.249185	-0.0385565	0.156368	1.74779	0.979506	0.631619	-1.03935	-1.2047	0.303036	0.389959	0.470401	1.12716	0.810097	0.66653	-0.023053	-0.0912917	1.23374	1.31036	1.38549	2.18428	1.75333	1.58725	-1.01611
TNFRSF13C	413	0.0854604	0.338013	0.423473	0.752395	0.201808	0.798192	0.6372	125.843	129.843	130.061	130.002	9.88467	8	58	1.50773e-08	5.57511	5.27626	5.34346	5.14504	5.2084	6.38843	6.43688	7.49143	6.5704	-0.442899	-0.808373	-0.726199	-0.968853	-0.891371	0.551746	0.611001	1.90066	0.774285	-0.298847	-0.231653	-0.430071	-0.366714	0.813317	0.861769	1.91632	0.995286	-1.23016	-1.17418	-1.3473	-1.28941	1.75725	1.81727	3.7746
TGFB2	414	0.00277896	0.256397	0.259176	0.282722	0.0107223	0.989278	0.210832	102.597	106.597	106.815	106.756	1.76345	8	58	0.103214	5.07854	5.26036	5.34169	5.36388	5.1268	5.77497	5.54281	5.49132	4.79994	-0.803981	-0.169477	0.114356	0.191769	-0.635547	1.62635	0.816193	0.636509	-1.77617	0.181824	0.263159	0.285342	0.0482665	0.696437	0.464278	0.412787	-0.278592	1.13432	1.2001	1.2187	1.03402	1.6205	1.37963	1.33126
MAPKAPK2	415	0.0201883	0.149474	0.169663	0.378185	0.118991	0.881009	0.674564	75.8909	79.8909	80.1091	80.0498	13.0838	8	58	1.4346e-10	8.06415	8.15201	8.33694	8.33654	8.64006	9.15751	9.52377	8.97258	9.39747	-1.21487	-1.05486	-0.718073	-0.718797	-0.166035	0.776346	1.44338	0.439559	1.21336	0.0878623	0.272787	0.27239	0.575906	1.09336	1.45962	0.908431	1.33331	1.06279	1.20814	1.20781	1.49061	2.1337	2.75035	1.877
CCL26	416	0.00904627	0.22414	0.233187	0.228796	0.0387941	0.961206	0.164746	96.1935	100.194	100.412	100.352	0.864771	8	58	0.551161	4.81572	4.80253	4.80331	4.75178	4.82458	5.23678	4.7203	4.78553	4.51909	0.04869	-0.0219012	-0.0177567	-0.293655	0.0961407	2.3032	-0.462219	-0.112955	-1.53955	-0.0131838	-0.0124098	-0.0639372	0.00886202	0.421059	-0.0954187	-0.0301893	-0.296623	-1.00918	-1.00864	-1.04531	1.00616	1.33891	-1.06838	-1.02115
CD3E	417	0.0957086	0.0917173	0.187426	0.625641	0.510648	0.489352	0.885069	58.1071	62.1071	62.3253	62.266	45.6602	8	58	3.00296e-22	9.37424	9.05031	8.84796	8.90052	8.34277	7.76346	7.42416	7.44204	6.9741	1.32697	0.949492	0.713693	0.774948	0.124992	-0.550075	-0.945462	-0.92463	-1.46992	-0.323927	-0.526278	-0.473711	-1.03147	-1.61077	-1.95007	-1.9322	-2.40014	-1.25173	-1.44021	-1.38868	-2.0441	-3.05416	-3.86394	-3.81636
CSF3R	418	0.107406	0.370094	0.4775	1.43669	0.224934	0.775066	0.792778	131.765	135.765	135.983	135.923	23.4046	8	58	1.5807e-15	9.27023	9.3581	9.90773	9.97355	11.465	11.8501	11.7192	10.8844	10.837	-1.3247	-1.23617	-0.682405	-0.616089	0.886585	1.27457	1.14272	0.301633	0.253854	0.0878702	0.6375	0.703321	2.19478	2.57987	2.449	1.61419	1.56677	1.0628	1.55563	1.62825	4.57818	5.97884	5.46037	3.0614
CXCL5	419	0.0401658	0.735186	0.775352	2.25825	0.0518033	0.948197	0.724513	165.675	169.675	169.893	169.834	17.6852	8	58	5.10521e-13	4.86917	4.86894	4.82181	4.73908	5.10293	7.28343	7.0893	8.78899	7.4599	-0.808255	-0.808406	-0.839013	-0.892742	-0.656447	0.759643	0.633566	1.7374	0.87425	-0.000232228	-0.0473602	-0.130093	0.233755	2.41426	2.22012	3.91982	2.59073	-1.00016	-1.03337	-1.09436	1.17589	5.33045	4.65933	15.135
PTGFR	420	0.0294022	0.253052	0.282454	0.380658	0.104096	0.895904	0.449991	105.896	109.896	110.114	110.054	4.50266	8	58	0.000270828	4.94926	5.09874	4.87032	5.04243	5.33165	5.82	5.84445	5.82629	5.24935	-0.980946	-0.602715	-1.18066	-0.745181	-0.0133984	1.22226	1.2841	1.23817	-0.221635	0.149484	-0.078932	0.0931788	0.382393	0.870748	0.895191	0.877038	0.300094	1.10917	-1.05624	1.06672	1.3035	1.82861	1.85986	1.8366
FCER1G	421	0.0407654	0.200283	0.241049	1.48546	0.169117	0.830883	0.89041	94.5064	98.5064	98.7245	98.6652	52.9935	8	58	7.35842e-24	9.65516	9.84332	10.0034	10.0057	11.0425	12.1289	12.8317	12.1629	12.3036	-1.15329	-1.00398	-0.876985	-0.875172	-0.0524115	0.809651	1.3673	0.83665	0.948237	0.188158	0.348202	0.350487	1.38735	2.47375	3.17651	2.50777	2.6484	1.13931	1.27297	1.27499	2.61598	5.55485	9.04117	5.68742
PTGIR	422	0.02657	0.208808	0.235378	0.438099	0.112882	0.887118	0.606806	95.0648	99.0648	99.283	99.2237	9.35334	8	58	3.51521e-08	5.38159	5.48545	5.53379	5.60826	6.1148	6.57694	6.39925	6.76669	6.0401	-1.18347	-0.981317	-0.887246	-0.742308	0.243578	1.14304	0.797196	1.51234	0.0981841	0.103863	0.152197	0.226666	0.733211	1.19535	1.01766	1.3851	0.658508	1.07465	1.11126	1.17013	1.66234	2.29001	2.02463	2.6119
ATF2	423	0.00767361	0.063691	0.0713646	0.0770422	0.107527	0.892473	0.31682	26.0058	30.0058	30.224	30.1647	1.90025	8	58	0.0772803	7.63109	7.74062	7.72784	7.74125	8.00393	7.73595	7.93766	7.80624	7.63945	-1.14161	-0.265264	-0.367582	-0.260266	1.84131	-0.302682	1.3111	0.259713	-1.07472	0.109536	0.0967474	0.110161	0.372842	0.104859	0.30657	0.175155	0.00836018	1.07888	1.06936	1.07935	1.2949	1.07539	1.23676	1.12909
MAFF	424	0.0682928	0.255125	0.323418	0.701487	0.211159	0.788841	0.706773	109.797	113.797	114.015	113.956	13.5806	8	58	7.39504e-11	5.14358	4.98493	5.30514	5.49417	5.869	6.53464	6.66532	6.90514	6.4755	-1.08003	-1.29768	-0.858386	-0.599047	-0.084817	0.828384	1.00766	1.33667	0.747252	-0.158647	0.161561	0.350596	0.725423	1.39106	1.52174	1.76156	1.33193	-1.11624	1.1185	1.27509	1.65339	2.62272	2.87138	3.39064
FYN	425	0.0186369	0.174682	0.193319	0.458313	0.096405	0.903595	0.683803	84.116	88.116	88.3341	88.2748	14.0714	8	58	3.89714e-11	8.436	8.29827	8.08468	8.27499	8.8054	7.79142	6.9885	7.14245	6.67832	0.821129	0.633476	0.34246	0.601749	1.32443	-0.0571124	-1.15109	-0.941334	-1.57371	-0.137727	-0.351317	-0.161013	0.369397	-0.64458	-1.4475	-1.29355	-1.75768	-1.10017	-1.27572	-1.11807	1.29181	-1.56328	-2.72735	-2.4513
ATG12	426	0.0238386	0.0523376	0.0761762	0.195662	0.31294	0.68706	0.787238	20.6653	24.6653	24.8835	24.8242	21.6852	8	58	7.99283e-15	7.77971	7.91433	7.88176	7.9113	8.3248	8.64237	8.80906	8.51846	8.686	-1.22051	-0.88823	-0.968639	-0.895718	0.124886	0.90873	1.32017	0.602891	1.01642	0.134623	0.102046	0.131589	0.545084	0.862656	1.02935	0.738746	0.906287	1.09781	1.07329	1.0955	1.45911	1.81838	2.0411	1.66873
TNFRSF11A	427	0.0240439	0.293851	0.317895	0.518438	0.0756348	0.924365	0.525879	113.481	117.481	117.7	117.64	6.70376	8	58	3.48151e-06	4.81572	4.80253	4.80331	4.66719	4.58983	5.77037	4.96811	6.38878	5.32381	-0.516611	-0.538596	-0.537305	-0.764284	-0.893292	1.07534	-0.262482	2.10657	0.330662	-0.0131838	-0.0124098	-0.148524	-0.225887	0.954655	0.152395	1.57306	0.50809	-1.00918	-1.00864	-1.10843	-1.1695	1.93812	1.11141	2.97535
DDX58	428	0	0.471699	0.471699	5.85483	0	1	0.9292	137.363	139.363	139.434	139.442	95.1507	8	58	1.7953e-30	6.95458	7.55504	7.52149	11.4784	12.277	12.3237	11.6561	11.0173	10.5024	-1.46268	-1.18721	-1.2026	0.612699	0.979036	1.00047	0.694187	0.401153	0.16493	0.600463	0.566912	4.52387	5.3224	5.36913	4.70149	4.06274	3.54783	1.5162	1.48135	23.0049	40.0132	41.3305	26.019	16.7112
NFATC3	429	0.0235453	0.0483915	0.0719369	0.451588	0.327306	0.672694	0.914889	16.4846	20.4846	20.7028	20.6435	68.1346	8	58	1.1939e-26	8.74158	8.66186	8.29672	8.21395	7.7204	7.3568	7.26042	6.88284	6.6208	1.28592	1.18247	0.70866	0.601258	-0.0391816	-0.510996	-0.636064	-1.12602	-1.46605	-0.0797206	-0.44486	-0.527629	-1.02118	-1.38478	-1.48116	-1.85874	-2.12078	-1.05681	-1.36118	-1.44156	-2.02957	-2.61131	-2.79173	-3.6269
TNFSF15	430	0	0.188798	0.188798	0.29943	0	1	0.445902	84.2543	86.2543	86.3257	86.3337	5.83433	8	58	1.82834e-05	4.81572	4.9415	4.85081	4.83004	5.11106	5.58225	5.82073	5.56999	4.48415	-0.663744	-0.381765	-0.585077	-0.631637	-0.00167058	1.0546	1.5892	1.02712	-1.40702	0.125788	0.0350926	0.0143226	0.295344	0.766533	1.00502	0.754275	-0.331568	1.0911	1.02462	1.00998	1.22718	1.70118	2.00696	1.68678
NFATC1	431	0.0151123	0.143782	0.158895	0.173549	0.0951092	0.904891	0.312355	72.7769	76.7769	76.9951	76.9358	1.93432	8	58	0.0718563	6.51184	6.41089	6.5058	6.42364	6.85412	6.91094	6.5557	6.75154	6.26801	-0.30065	-0.766826	-0.328549	-0.707951	1.28	1.54242	-0.0981147	0.806296	-1.42662	-0.100948	-0.00604144	-0.0881991	0.342282	0.399107	0.0438579	0.239704	-0.243824	-1.07248	-1.0042	-1.06304	1.26776	1.31869	1.03087	1.18075
FCAR	432	0.0794652	0.401039	0.480505	1.94879	0.165379	0.834621	0.832596	134.661	138.661	138.879	138.82	32.3268	8	58	1.16319e-18	8.18016	8.45558	9.2971	9.10001	10.379	11.2313	11.6652	10.7848	11.1541	-1.4287	-1.2157	-0.564865	-0.717293	0.271869	0.931062	1.26659	0.585702	0.871336	0.275418	1.11694	0.91985	2.19883	3.05117	3.485	2.60462	2.97394	1.21034	2.16886	1.89192	4.59108	8.28883	11.1967	6.08231
NOTCH2	433	0.0692014	0.151965	0.221167	0.285999	0.312892	0.687108	0.577362	82.4885	86.4885	86.7067	86.6474	5.05985	8	58	8.57019e-05	8.91576	9.05839	9.46588	9.27354	9.86092	9.33574	9.51656	9.10113	8.82969	-1.06537	-0.626463	0.627556	0.0356579	1.84323	0.22705	0.783501	-0.494913	-1.33025	0.142625	0.550121	0.357783	0.945159	0.419976	0.600796	0.185372	-0.0860713	1.10391	1.46421	1.28145	1.9254	1.33791	1.51655	1.13711
CCL21	434	0.0781201	0.322144	0.400264	0.558199	0.195172	0.804828	0.533378	122.859	126.859	127.077	127.018	5.51758	8	58	3.4127e-05	4.93862	4.96916	5.20675	5.2093	5.63702	5.99485	5.78817	6.50072	5.35007	-1.10651	-1.04741	-0.587736	-0.582805	0.244762	0.937091	0.537207	1.91584	-0.310435	0.0305464	0.268129	0.270678	0.698405	1.05623	0.849555	1.5621	0.411452	1.0214	1.20425	1.20637	1.62271	2.0795	1.80195	2.95284
TYK2	435	0.0100498	0.0631311	0.0731809	0.0916504	0.137328	0.862672	0.435803	26.5244	30.5244	30.7426	30.6833	3.77872	8	58	0.00126421	7.55586	7.64708	7.86609	7.47549	7.78869	7.87256	8.02401	7.79307	7.74838	-1.15756	-0.620206	0.670016	-1.63105	0.214043	0.708121	1.60027	0.239808	-0.0234416	0.0912165	0.310233	-0.0803746	0.232831	0.316701	0.468144	0.237205	0.192518	1.06527	1.23991	-1.05729	1.17514	1.24548	1.38333	1.17871
GNLY	436	0.618161	0.198899	0.81706	0.937706	0.756568	0.243432	0.835231	110.131	114.131	114.349	114.29	12.312	8	58	4.13862e-10	10.1356	10.172	9.75696	9.5947	9.15051	9.24701	8.75822	8.54289	8.22226	1.23077	1.28348	0.681812	0.446567	-0.197417	-0.0575049	-0.766158	-1.07835	-1.5432	0.0363525	-0.378644	-0.540903	-0.985088	-0.888584	-1.37737	-1.59271	-1.91334	1.02552	-1.30012	-1.45488	-1.97943	-1.85136	-2.59795	-3.01615
IFIT1	437	0.131187	0.574945	0.706132	6.23397	0.185783	0.814217	0.925296	156.178	160.178	160.396	160.337	81.1747	8	58	1.22202e-28	9.2848	10.0514	9.59077	13.8806	14.6735	14.8032	13.9687	13.3892	12.8985	-1.44283	-1.09928	-1.30572	0.616652	0.971981	1.03008	0.656151	0.396432	0.17653	0.766635	0.305973	4.59581	5.38873	5.51839	4.68395	4.10437	3.61366	1.7013	1.23625	24.1811	41.8958	45.8353	25.7045	17.2005
ICAM1	438	0.0917882	0.266023	0.357811	1.8071	0.256527	0.743473	0.882125	113.485	117.485	117.703	117.644	47.5201	8	58	1.11986e-22	5.25272	5.44224	5.35269	5.90778	6.25692	8.23512	8.3643	8.22186	7.47695	-1.09782	-0.956349	-1.02319	-0.608832	-0.348213	1.12845	1.22489	1.11856	0.562507	0.189518	0.0999727	0.655065	1.0042	2.9824	3.11159	2.96914	2.22424	1.14038	1.07175	1.57469	2.00583	7.903	8.64332	7.8307
JAK2	439	0.0295105	0.299373	0.328883	1.11594	0.0897293	0.910271	0.776885	115.111	119.111	119.329	119.269	22.8239	8	58	2.70552e-15	9.33294	9.69311	9.80921	10.7978	11.9573	11.3858	10.7523	10.0328	10.0205	-1.26156	-0.843647	-0.708938	0.438151	1.78356	1.12043	0.385363	-0.449562	-0.463795	0.360175	0.476272	1.46488	2.62441	2.0529	1.41939	0.699813	0.687547	1.28358	1.39114	2.76041	6.16632	4.14939	2.67472	1.62429
PTGS2	440	0.150248	1.93611	2.08636	3.22735	0.0720146	0.927985	0.497384	222.687	226.687	226.905	226.846	5.72081	8	58	2.28381e-05	9.07733	8.08055	9.48049	10.1977	10.8101	10.0602	7.7812	7.05138	5.39244	0.24066	-0.332828	0.47261	0.885232	1.23762	0.806125	-0.50506	-0.924952	-1.8794	-0.996782	0.403152	1.12033	1.73281	0.982837	-1.29614	-2.02596	-3.68489	-1.99554	1.32239	2.17397	3.32375	1.97635	-2.45571	-4.07261
SLC2A1	441	0.193724	0.410811	0.604535	1.00348	0.320452	0.679548	0.674625	140.361	144.361	144.58	144.52	10.3955	8	58	6.82463e-09	5.83043	5.90498	5.7026	5.91894	6.41566	7.60128	7.49887	7.29076	6.40129	-0.889782	-0.791769	-1.05785	-0.773416	-0.120361	1.43844	1.3038	1.03019	-0.139248	0.0745489	-0.127833	0.0885079	0.585221	1.77084	1.66844	1.46033	0.570856	1.05303	-1.09265	1.06327	1.50027	3.41254	3.1787	2.75171
CXCL3	442	0.103178	0.29234	0.395518	0.607408	0.260867	0.739133	0.614838	119.074	123.074	123.292	123.232	7.03003	8	58	1.90648e-06	6.07513	6.03416	6.25547	6.28673	6.38635	7.39165	7.3286	6.89528	6.56697	-0.985387	-1.06534	-0.633434	-0.572419	-0.378001	1.58395	1.4609	0.61523	-0.0255017	-0.0409662	0.180339	0.211603	0.311222	1.31652	1.25347	0.820149	0.491841	-1.0288	1.13315	1.15797	1.24076	2.49064	2.38414	1.76559
NFKBIZ	443	0.00596684	0.16401	0.169977	0.334948	0.0351038	0.964896	0.581542	77.9052	81.9052	82.1234	82.0641	9.3108	8	58	3.76544e-08	8.19127	8.17437	8.42382	8.54014	8.71	9.41736	8.93273	7.92053	7.97959	-0.588155	-0.622994	-0.108876	0.130862	0.480944	1.93881	0.939987	-1.14614	-1.02444	-0.0169041	0.232547	0.348868	0.518729	1.22609	0.741457	-0.270736	-0.211684	-1.01179	1.17491	1.27356	1.43269	2.33932	1.67186	-1.20642
PECAM1	444	0.0213838	0.119807	0.141191	0.213938	0.151453	0.848547	0.542967	64.1452	68.1452	68.3634	68.3041	5.67961	8	58	2.47668e-05	9.43029	9.41925	9.34801	9.31186	9.67432	9.52103	10.2655	10.003	10.2475	-0.6824	-0.711282	-0.89759	-0.992142	-0.0441299	-0.445064	1.50208	0.815525	1.45501	-0.0110425	-0.0822739	-0.118424	0.244031	0.0907412	0.835197	0.572705	0.8172	-1.00768	-1.05869	-1.08555	1.1843	1.06492	1.7841	1.48731
LEF1	445	0.141231	0.0742822	0.215514	0.381474	0.655325	0.344675	0.848267	49.7341	53.7341	53.9523	53.893	23.2514	8	58	1.81978e-15	8.41273	8.10373	7.99203	7.88293	7.55237	7.275	7.30909	7.31206	6.32394	1.35973	0.858933	0.67789	0.501074	-0.034676	-0.484212	-0.428957	-0.424152	-2.02563	-0.308995	-0.4207	-0.529796	-0.860357	-1.13772	-1.10363	-1.10067	-2.08879	-1.23884	-1.33858	-1.44373	-1.81549	-2.20033	-2.14895	-2.14454
OAS2	446	0.00128314	0.538551	0.539835	8.6862	0.00237691	0.997623	0.94564	145.185	149.185	149.403	149.344	125.79	8	58	9.5353e-34	6.68062	7.29389	7.3487	11.5487	13.1912	13.2169	12.8029	12.1556	11.4845	-1.45192	-1.22679	-1.20668	0.335085	0.938028	0.947448	0.795478	0.557853	0.311494	0.613273	0.668078	4.8681	6.51062	6.53629	6.12229	5.47496	4.80384	1.52973	1.58895	29.2042	91.1786	92.815	69.6617	44.4762
FLT3LG	447	0.0347985	0.0791486	0.113947	0.128849	0.305392	0.694608	0.511021	44.4611	48.4611	48.6793	48.62	3.04444	8	58	0.00629307	7.81028	7.60314	7.50532	7.56367	7.49659	7.29092	7.56808	7.65687	7.03326	1.37068	0.446337	0.00979099	0.270163	-0.0291751	-0.946987	0.289875	0.686107	-2.09679	-0.207135	-0.30496	-0.246613	-0.313691	-0.519363	-0.242196	-0.153405	-0.77702	-1.15439	-1.23538	-1.18642	-1.24288	-1.43332	-1.18279	-1.11219
IFNA2	448	0	0.1986	0.1986	0.578721	0	1	0.698425	87.19	89.19	89.2614	89.2694	16.7905	8	58	1.40983e-12	4.86933	4.83432	4.97489	4.78866	5.52676	6.37611	6.29451	6.24077	5.44195	-0.918476	-0.970873	-0.76049	-1.03921	0.0654487	1.33658	1.21447	1.13404	-0.0614927	-0.0350101	0.105563	-0.0806718	0.657435	1.50678	1.42518	1.37145	0.572616	-1.02456	1.07591	-1.05751	1.57728	2.84174	2.68548	2.5873
IFNGR2	449	0.097714	0.238566	0.33628	1.42024	0.290573	0.709427	0.866065	108.07	112.07	112.288	112.229	39.9266	8	58	7.90165e-21	8.54916	8.80705	9.22926	9.19986	10.6997	11.255	11.3301	10.3965	10.3914	-1.36025	-1.1158	-0.715606	-0.743468	0.678189	1.20449	1.27572	0.390817	0.385913	0.257891	0.680101	0.650707	2.15056	2.70581	2.78095	1.84738	1.84221	1.19573	1.60225	1.56994	4.44	6.52425	6.87307	3.59846
LCK	450	0.0495704	0.0991502	0.148721	0.387673	0.333313	0.666687	0.796985	58.2405	62.2405	62.4587	62.3994	24.1532	8	58	8.01914e-16	7.79006	7.68475	7.58205	7.43041	7.37089	6.71716	6.3458	6.22907	6.11777	1.12909	0.972696	0.82018	0.594974	0.506588	-0.464261	-1.01576	-1.18911	-1.3544	-0.105313	-0.208012	-0.359657	-0.419173	-1.07291	-1.44427	-1.56099	-1.67229	-1.07573	-1.1551	-1.28312	-1.33716	-2.10367	-2.72125	-2.95056
HLA-B	451	0.254747	0.191453	0.446199	0.769101	0.570926	0.429074	0.805394	102.33	106.33	106.548	106.489	16.5325	8	58	1.90211e-12	12.3086	12.451	12.7545	13.0615	13.8401	13.8286	13.7861	12.9807	12.8863	-1.34257	-1.10097	-0.585767	-0.0649114	1.25654	1.23702	1.16488	-0.202013	-0.362201	0.142371	0.44596	0.752883	1.53157	1.52006	1.47756	0.672094	0.5777	1.10372	1.36222	1.68516	2.891	2.86804	2.78477	1.59338
TLR1	452	0.070707	0.432142	0.502849	1.05611	0.140613	0.859387	0.665141	138.199	142.199	142.417	142.358	11.919	8	58	7.20254e-10	8.70575	9.0506	9.46869	9.40484	11.0503	10.4445	10.2918	9.53063	9.17388	-1.28767	-0.831924	-0.279399	-0.363788	1.81075	1.01017	0.808431	-0.19755	-0.669011	0.344858	0.762946	0.69909	2.34453	1.73874	1.58609	0.824879	0.468132	1.27003	1.69695	1.62348	5.07894	3.33744	3.00235	1.77139
KLRB1	453	0.353815	0.150757	0.504572	0.805698	0.701219	0.298781	0.854416	92.1785	96.1785	96.3966	96.3373	20.9295	8	58	1.6781e-14	7.63803	7.71742	7.17723	6.76071	6.36599	6.56019	6.10371	5.92103	6.21952	1.39708	1.51767	0.697194	0.0645556	-0.534962	-0.239995	-0.933324	-1.21079	-0.757433	0.079393	-0.4608	-0.877323	-1.27204	-1.07784	-1.53432	-1.717	-1.41851	1.05657	-1.3763	-1.83696	-2.41503	-2.11087	-2.89651	-3.28751
CFH	454	0	0.23036	0.23036	0.326455	0	1	0.379891	95.7942	97.7942	97.8656	97.8737	4.44149	8	58	0.000307892	4.97857	5.19073	5.32058	5.26396	5.8245	5.97509	5.6857	5.28542	4.96278	-1.13322	-0.545247	-0.185404	-0.342308	1.21111	1.62845	0.82646	-0.28285	-1.17699	0.212165	0.342011	0.285393	0.845929	0.996519	0.707131	0.306848	-0.015791	1.15843	1.26752	1.21874	1.79742	1.99518	1.63255	1.237
TAGAP	455	0.0456339	0.274999	0.320633	0.617068	0.142324	0.857676	0.635457	112.04	116.04	116.258	116.199	9.66679	8	58	2.12746e-08	9.23796	9.4718	9.61966	10.4247	10.2839	9.79629	9.15334	8.33212	7.98838	-0.159962	0.128626	0.311104	1.30467	1.13088	0.529086	-0.264401	-1.27789	-1.70211	0.233838	0.381698	1.18677	1.04595	0.558325	-0.0846252	-0.90584	-1.24958	1.17596	1.30287	2.27643	2.06472	1.47256	-1.06041	-1.87364
CD38	456	0	0.464931	0.464931	0.768406	0	1	0.468282	136.524	138.524	138.596	138.604	6.38504	8	58	6.33612e-06	8.80422	8.69121	8.5068	9.04368	9.14044	10.4815	9.71328	9.43034	9.74493	-0.76882	-0.949884	-1.24537	-0.385123	-0.230087	1.91862	0.687769	0.234421	0.738481	-0.113004	-0.29742	0.239467	0.336226	1.67724	0.909066	0.626128	0.940715	-1.08148	-1.22894	1.18056	1.26245	3.19817	1.87783	1.54342
PYCARD	457	0.0332067	0.0975109	0.130718	0.808771	0.254034	0.745966	0.903428	55.2078	59.2078	59.426	59.3667	58.856	8	58	5.15592e-25	8.09052	8.30398	8.45643	8.91074	9.90405	9.92196	10.2697	9.85772	10.1055	-1.41581	-1.16867	-0.992165	-0.466179	0.68383	0.704574	1.10712	0.630191	0.917101	0.213467	0.365917	0.820228	1.81353	1.83145	2.17914	1.7672	2.01501	1.15947	1.2887	1.76569	3.51501	3.55894	4.52885	3.40393
FXYD2	458	0	0.250068	0.250068	0.41861	0	1	0.475032	100.555	102.555	102.627	102.635	6.56037	8	58	4.55197e-06	4.81572	4.84712	4.94908	4.90887	5.66328	5.84956	5.64275	5.96012	5.04767	-1.02682	-0.959984	-0.743013	-0.828577	0.776811	1.17321	0.733112	1.40848	-0.533227	0.0314066	0.133366	0.093158	0.847568	1.03385	0.827033	1.1444	0.23195	1.02201	1.09685	1.0667	1.79947	2.04748	1.77403	2.21055
EIF2A	459	0.0197744	0.065582	0.0853564	0.146269	0.231668	0.768332	0.639697	31.5868	35.5868	35.805	35.7457	9.21584	8	58	4.39277e-08	8.24091	8.24884	7.95389	8.15782	7.96812	7.84002	7.55222	7.35003	7.45043	1.11089	1.13419	0.268336	0.866994	0.31011	-0.0659238	-0.910742	-1.50428	-1.20956	0.00793723	-0.287022	-0.0830837	-0.272791	-0.400891	-0.688685	-0.89088	-0.790482	1.00552	-1.22012	-1.05928	-1.20814	-1.32032	-1.61181	-1.85431
BST2	460	0.0150514	0.206476	0.221527	1.69468	0.0679435	0.932056	0.897732	92.7024	96.7024	96.9206	96.8613	59.9313	8	58	3.24762e-25	8.14513	8.49804	8.59744	9.99683	11.2645	10.9381	10.7097	10.3779	10.0556	-1.47681	-1.16977	-1.08329	0.134201	1.23705	0.953128	0.754385	0.465768	0.185334	0.352914	0.452313	1.8517	3.11933	2.79298	2.56455	2.23281	1.91048	1.27714	1.36823	3.60926	8.68984	6.93061	5.91569	4.70048
PDGFB	461	0.00354026	0.308401	0.311941	0.564987	0.0113491	0.988651	0.525254	113.341	117.341	117.56	117.5	7.79897	8	58	4.809e-07	4.83085	4.80419	4.81794	4.65523	5.69816	5.82855	5.94061	6.18298	5.36099	-0.883525	-0.929191	-0.905648	-1.18438	0.602228	0.825594	1.01755	1.43274	0.0246258	-0.0266576	-0.0129144	-0.175622	0.867312	0.997703	1.10976	1.35213	0.530135	-1.01865	-1.00899	-1.12945	1.82426	1.99682	2.15809	2.55288
ITGAL	462	0.00284052	0.0705876	0.0734281	0.0956724	0.0386843	0.961316	0.370901	29.1742	33.1742	33.3924	33.3331	3.53558	8	58	0.00214272	9.11446	9.23563	9.27176	9.28545	9.62451	9.30731	9.53885	9.17364	8.89053	-0.72154	-0.164274	0.00191283	0.0648387	1.62421	0.165379	1.23024	-0.449374	-1.75139	0.121171	0.157306	0.170988	0.510054	0.19285	0.42439	0.0591791	-0.223928	1.08762	1.1152	1.12583	1.4241	1.14302	1.34201	1.04187
LTB4R2	463	0.0628062	0.308395	0.371201	1.61774	0.169197	0.830803	0.845055	119.544	123.544	123.763	123.703	34.8297	8	58	2.04112e-19	4.86933	4.86708	4.95413	4.66572	5.85315	7.20799	7.32561	8.10471	6.75922	-0.917578	-0.919303	-0.852635	-1.07351	-0.164116	0.873498	0.963578	1.56026	0.529807	-0.00225259	0.0847988	-0.203605	0.983818	2.33866	2.45628	3.23538	1.88989	-1.00156	1.06054	-1.15157	1.97769	5.05833	5.488	9.41776
XCL1	464	0.0135723	0.241361	0.254933	0.313475	0.0532385	0.946762	0.348963	101.135	105.135	105.353	105.294	3.13425	8	58	0.00516317	4.87883	5.08452	4.9727	4.85892	5.273	5.53779	5.68268	5.62696	4.98591	-1.01161	-0.385664	-0.725959	-1.0722	0.187878	0.99368	1.43458	1.26504	-0.685746	0.205694	0.0938679	-0.0199114	0.394167	0.658964	0.80385	0.748136	0.107083	1.15324	1.06723	-1.0139	1.31418	1.57895	1.74575	1.67962
PSMB5	465	0.00767103	0.106369	0.11404	0.369346	0.0672663	0.932734	0.75819	54.2047	58.2047	58.4229	58.3636	20.8281	8	58	1.85632e-14	6.57319	6.77244	6.72675	6.89513	7.40838	7.73681	7.78408	8.06122	7.9485	-1.28317	-0.94216	-1.02035	-0.732182	0.146223	0.708306	0.789206	1.26352	1.07061	0.199252	0.153565	0.321942	0.835194	1.16362	1.21089	1.48803	1.37531	1.1481	1.11231	1.25001	1.7841	2.24019	2.3148	2.80506
PLA2G6	466	0.0362648	0.265675	0.30194	0.650796	0.120106	0.879894	0.663983	109.288	113.288	113.507	113.447	12.2606	8	58	4.4471e-10	4.92351	4.87181	4.87509	4.81683	5.49493	6.47126	6.42034	5.63813	5.39002	-0.786295	-0.866	-0.86095	-0.950762	0.0946275	1.59979	1.52129	0.315404	-0.0671077	-0.0517011	-0.0484255	-0.106682	0.571413	1.54774	1.49682	0.71462	0.466503	-1.03649	-1.03414	-1.07675	1.48598	2.92359	2.82221	1.64105
CMA1	467	0.111615	0.181428	0.293043	0.338328	0.380882	0.619118	0.576091	94.4722	98.4722	98.6904	98.6311	3.91755	8	58	0.000937342	5.98772	5.95298	5.67758	5.62601	5.89678	5.75829	5.62921	4.87845	4.57761	0.880522	0.810028	0.251114	0.146458	0.695977	0.4149	0.152935	-1.3707	-1.98124	-0.0347351	-0.310134	-0.361703	-0.0909326	-0.229431	-0.358511	-1.10927	-1.4101	-1.02437	-1.23982	-1.28494	-1.06506	-1.17237	-1.2821	-2.15736
NOD1	468	0.00446781	0.102267	0.106735	0.474907	0.041859	0.958141	0.816742	50.8228	54.8228	55.0409	54.9816	30.8526	8	58	3.4107e-18	5.8282	6.00605	6.02086	6.44758	7.11325	6.92257	7.57661	7.26671	7.31956	-1.36048	-1.08989	-1.06736	-0.418103	0.594709	0.304597	1.29971	0.828201	0.908604	0.177845	0.192655	0.619376	1.28505	1.09437	1.74841	1.43851	1.49135	1.13119	1.14286	1.53621	2.4369	2.1352	3.35988	2.71041
ATG7	469	0.0761703	0.164847	0.241018	0.481147	0.316036	0.683964	0.727572	87.2882	91.2882	91.5064	91.4471	14.7536	8	58	1.63557e-11	6.77237	6.88206	7.24064	6.84201	7.12084	8.051	8.37789	7.69959	7.12319	-1.00602	-0.813476	-0.184079	-0.883776	-0.394352	1.23833	1.8121	0.621504	-0.390232	0.109695	0.468272	0.0696445	0.348476	1.27864	1.60552	0.927223	0.350824	1.079	1.38345	1.04946	1.27322	2.4261	3.04306	1.90161
CCL20	470	0.0497043	0.385233	0.434938	0.969224	0.114279	0.885721	0.672256	130.635	134.635	134.854	134.794	12.9271	8	58	1.7735e-10	4.93749	4.98345	4.98136	4.89347	5.70952	6.86659	6.84352	6.13778	5.94858	-0.94749	-0.890393	-0.892989	-1.00217	0.0115773	1.44897	1.42032	0.543603	0.308564	0.0459617	0.0438716	-0.0440159	0.772026	1.9291	1.90603	1.20029	1.01109	1.03237	1.03088	-1.03098	1.70767	3.80817	3.74777	2.29787
PRKCB	471	0.0259512	0.261369	0.287321	0.93422	0.0903215	0.909678	0.76737	107.259	111.259	111.477	111.418	21.9203	8	58	6.37014e-15	8.7443	8.81968	9.10159	9.469	10.4182	10.7196	10.9215	10.2116	9.87927	-1.30448	-1.21217	-0.866895	-0.416927	0.745602	1.11472	1.36206	0.492543	0.0855539	0.0753734	0.357291	0.724691	1.6739	1.97528	2.17724	1.46728	1.13497	1.05363	1.28102	1.65255	3.19076	3.93205	4.52287	2.76499
C5aR1	472	0.0778743	0.181233	0.259107	0.997414	0.300549	0.699451	0.855282	92.3866	96.3866	96.6047	96.5454	36.7028	8	58	5.92128e-20	8.35468	8.29062	9.00136	8.84284	9.65272	10.3321	10.8758	10.2128	10.7632	-1.23011	-1.29381	-0.587084	-0.74471	0.0605937	0.736117	1.27673	0.617477	1.1648	-0.0640597	0.646685	0.488163	1.29805	1.97741	2.5211	1.8581	2.40853	-1.0454	1.56557	1.40266	2.45896	3.93785	5.74019	3.62529
LGALS3	473	0.117291	0.251632	0.368924	0.389066	0.317928	0.682072	0.485832	111.868	115.868	116.086	116.026	2.82611	8	58	0.0101911	11.6735	11.8165	12.2666	11.825	11.9402	12.0504	12.6212	11.5568	12.1718	-0.969592	-0.533579	0.840001	-0.507574	-0.15613	0.180152	1.92191	-1.32592	0.55074	0.142905	0.5931	0.151428	0.266615	0.376832	0.947699	-0.116789	0.498294	1.10413	1.50848	1.11067	1.20298	1.29849	1.92879	-1.08432
MRC1	474	0.0631305	0.211058	0.274189	0.431605	0.230245	0.769755	0.606953	99.3394	103.339	103.558	103.498	8.06957	8	58	3.0022e-07	5.09071	5.25358	5.2442	5.08117	5.24853	6.2413	6.25682	5.82634	5.94288	-0.99482	-0.661069	-0.680294	-1.01436	-0.671403	1.36301	1.39481	0.512665	0.751474	0.162866	0.153485	-0.00953691	0.157823	1.15059	1.16611	0.735633	0.852168	1.11951	1.11225	-1.00663	1.1156	2.22004	2.24405	1.66513
ENTPD1	475	0.0791325	0.298167	0.377299	0.521361	0.209734	0.790266	0.538793	118.798	122.798	123.016	122.957	5.19283	8	58	6.54358e-05	6.30945	6.61393	6.76056	6.7917	7.45756	7.2506	7.1511	6.06847	6.11233	-0.830775	-0.220539	0.0733438	0.135753	1.47029	1.0555	0.856062	-1.31376	-1.22586	0.304475	0.451107	0.482246	1.14811	0.941149	0.841642	-0.240985	-0.197128	1.23497	1.36709	1.39692	2.21623	1.92006	1.79209	-1.1818
SMAD7	476	0.113562	0.208146	0.321709	0.808551	0.352997	0.647003	0.796023	101.748	105.748	105.966	105.907	22.377	8	58	4.11945e-15	6.34491	6.44558	6.45771	6.90766	7.79927	7.88941	7.96151	8.5555	7.566	-1.21822	-1.09311	-1.07805	-0.518935	0.588969	0.700985	0.790577	1.52867	0.29912	0.100678	0.112804	0.562758	1.45436	1.54451	1.61661	2.21059	1.2211	1.07228	1.08133	1.47709	2.74035	2.91704	3.06653	4.62866
IDO1	477	0.547549	0.580856	1.1284	3.33668	0.485242	0.514758	0.863338	164.531	168.531	168.749	168.689	33.8703	8	58	3.92878e-19	9.97335	10.3919	10.9576	12.1788	13.3544	13.9164	13.5834	12.9566	13.7376	-1.54612	-1.27255	-0.902836	-0.104663	0.663739	1.03106	0.813413	0.403736	0.914223	0.418557	0.984213	2.20541	3.38105	3.94305	3.61005	2.98325	3.76429	1.33659	1.97823	4.61205	10.4183	15.3807	12.2105	7.90767
CCR3	478	0.0918907	0.240889	0.332779	0.372416	0.276131	0.723869	0.483368	108.253	112.253	112.471	112.411	2.62598	8	58	0.0158592	6.23031	6.91649	6.06981	6.33913	6.43412	6.36457	6.23194	6.12458	5.13625	0.0532744	1.51188	-0.287892	0.284591	0.48651	0.338684	0.0567538	-0.171464	-2.27233	0.686181	-0.160497	0.10882	0.203811	0.134268	0.00163683	-0.105726	-1.09405	1.60902	-1.11767	1.07835	1.15174	1.09754	1.00114	-1.07604
BCAP31	479	0.00432547	0.0595245	0.06385	0.0649277	0.0677443	0.932256	0.230403	20.554	24.554	24.7722	24.7129	1.32866	8	58	0.247857	7.61848	7.6616	7.64184	7.6482	7.68536	7.5876	7.95937	7.72361	7.54134	-0.466323	-0.105202	-0.270659	-0.217373	0.0938585	-0.724999	2.38899	0.414229	-1.11252	0.0431128	0.0233595	0.0297211	0.0668777	-0.0308824	0.340884	0.105125	-0.0771466	1.03033	1.01632	1.02081	1.04745	-1.02164	1.26653	1.07559
PRDM1	480	0	0.202999	0.202999	0.487628	0	1	0.634161	88.4606	90.4606	90.532	90.54	12.5675	8	58	2.90226e-10	7.34187	7.70701	7.65933	8.21633	9.02084	8.04856	7.40525	7.2155	6.95181	-0.619279	-0.0360901	-0.112244	0.777361	2.06227	0.509411	-0.518057	-0.821111	-1.24226	0.365146	0.317464	0.874463	1.67897	0.706694	0.0633771	-0.12637	-0.390063	1.28801	1.24614	1.83333	3.20199	1.63206	1.04491	-1.09154
ITGA4	481	0.031708	0.118335	0.150043	1.24185	0.211326	0.788674	0.923175	65.2438	69.2438	69.462	69.4027	78.0766	8	58	3.40551e-28	10.4197	10.3285	10.2511	10.3607	9.78219	8.50166	7.72815	7.52204	7.24485	0.950914	0.883841	0.826872	0.90749	0.482105	-0.45949	-1.02827	-1.17982	-1.38364	-0.0912159	-0.168692	-0.0590546	-0.637559	-1.91809	-2.6916	-2.89771	-3.17489	-1.06527	-1.12404	-1.04178	-1.55569	-3.77922	-6.46031	-7.45242
IRF1	482	0.0365295	0.314549	0.351079	0.757896	0.104049	0.895951	0.656615	118.512	122.512	122.73	122.67	11.7807	8	58	8.77383e-10	9.57343	10.2394	10.3668	11.1778	11.6679	10.6549	10.2146	10.2186	10.346	-1.51186	-0.419913	-0.210995	1.11874	1.92231	0.261338	-0.460541	-0.453971	-0.245104	0.665958	0.793373	1.60435	2.09443	1.08144	0.641179	0.645186	0.77257	1.58662	1.73312	3.04059	4.27057	2.11614	1.5596	1.56394
CCL23	483	0	0.502328	0.502328	2.65975	0	1	0.83403	141.012	143.012	143.083	143.091	36.4326	8	58	7.05606e-20	4.81572	4.81221	4.80331	4.66572	5.05657	7.28056	8.56411	8.65101	8.00585	-0.830224	-0.832193	-0.837189	-0.914405	-0.695051	0.553123	1.27349	1.32227	0.960178	-0.00350727	-0.0124098	-0.149993	0.240851	2.46484	3.74839	3.8353	3.19013	-1.00243	-1.00864	-1.10956	1.18169	5.52066	13.4394	14.2738
RAF1	484	0.0538685	0.174146	0.228015	0.252689	0.23625	0.76375	0.446575	88.3567	92.3567	92.5749	92.5156	2.37283	8	58	0.0277075	8.31785	8.30186	8.92214	8.23637	8.43197	8.43626	8.56901	8.80961	8.09646	-0.521945	-0.581503	1.72937	-0.825504	-0.0967865	-0.0807839	0.41377	1.31013	-1.34674	-0.0159866	0.604294	-0.081481	0.114121	0.118416	0.251164	0.491764	-0.221392	-1.01114	1.52024	-1.0581	1.08232	1.08554	1.19017	1.40616
LTB4R	485	0.118658	0.187797	0.306455	1.37323	0.387196	0.612804	0.891947	96.6291	100.629	100.847	100.788	51.9064	8	58	1.23871e-23	5.554	5.41352	6.19041	5.92055	7.00082	7.81997	8.52915	8.16207	7.74229	-1.15475	-1.273	-0.619059	-0.846214	0.0630922	0.752601	1.34954	1.04057	0.687219	-0.140482	0.636412	0.366548	1.44682	2.26597	2.97515	2.60808	2.18829	-1.10227	1.55446	1.28926	2.72607	4.80978	7.86338	6.09691
IRGC	486	0.154919	0.280128	0.435046	2.80983	0.356097	0.643903	0.921027	119.051	123.051	123.27	123.21	74.9179	8	58	1.00641e-27	5.01722	5.31028	5.52281	5.73992	7.55376	8.67944	8.979	9.00414	8.79121	-1.23342	-1.0661	-0.944759	-0.820799	0.214807	0.857508	1.02854	1.0429	0.921322	0.293056	0.505582	0.722695	2.53654	3.66221	3.96177	3.98692	3.77398	1.22523	1.4197	1.65026	5.80195	12.6601	15.5816	15.8556
S100A9	487	0.484533	0.691444	1.17598	5.45872	0.412026	0.587974	0.900101	172.838	176.838	177.057	176.997	56.0584	8	58	1.77858e-24	12.8229	13.5517	14.4015	14.435	16.9475	18.1117	18.5701	17.6616	18.5139	-1.43551	-1.1175	-0.746729	-0.732095	0.364162	0.872153	1.07214	0.675739	1.04765	0.728828	1.5786	1.61213	4.12461	5.28886	5.74719	4.8387	5.69107	1.65729	2.98679	3.05703	17.4434	39.0935	53.7128	28.6151
TOLLIP	488	0.096311	0.319409	0.41572	1.47709	0.231673	0.768327	0.82623	123.411	127.411	127.629	127.57	30.1309	8	58	5.86136e-18	5.75668	6.06587	6.12715	6.08715	7.53779	8.35883	8.4733	8.04427	8.29154	-1.24011	-0.973275	-0.920383	-0.954907	0.297025	1.0056	1.10439	0.734133	0.947529	0.309191	0.370478	0.330475	1.78111	2.60215	2.71662	2.2876	2.53486	1.23901	1.29278	1.25743	3.43691	6.07193	6.57332	4.88242
CLU	489	0.863987	0.242518	1.1065	1.79335	0.780825	0.219175	0.89502	122.553	126.553	126.771	126.712	38.39	8	58	2.0282e-20	6.76709	6.93454	6.9273	7.19651	7.66495	8.70728	9.57624	9.85887	10.0106	-1.04259	-0.919258	-0.924587	-0.726306	-0.38127	0.386458	1.02649	1.23466	1.3464	0.167446	0.160211	0.429413	0.897861	1.94019	2.80915	3.09177	3.24349	1.12307	1.11745	1.34669	1.8633	3.83756	7.00871	8.52544
IL1B	490	0.181938	0.500938	0.682876	1.65975	0.26643	0.73357	0.758643	150.459	154.459	154.677	154.618	17.6775	8	58	5.14914e-13	7.34448	8.03469	8.17875	9.12034	10.4754	9.68705	8.97084	8.59202	7.52175	-1.28895	-0.61184	-0.470519	0.453194	1.78257	1.00915	0.306535	-0.0650915	-1.11505	0.690214	0.834269	1.77586	3.13096	2.34257	1.62636	1.24754	0.177267	1.61352	1.78295	3.42441	8.76019	5.07205	3.08733	2.37437
PML	491	0.042194	0.206713	0.248907	2.3131	0.169517	0.830483	0.927369	96.3515	100.352	100.57	100.51	84.516	8	58	4.20741e-29	5.53596	5.87934	5.7689	7.61548	8.61017	8.93435	8.86478	8.61178	8.0099	-1.40904	-1.16721	-1.24499	0.055455	0.755954	0.984255	0.93526	0.757092	0.333221	0.343381	0.232941	2.07953	3.07421	3.39839	3.32882	3.07583	2.47394	1.26873	1.17523	4.22668	8.42228	10.5443	10.0479	8.43172
HSH2D	492	0.0220843	0.244386	0.26647	1.17279	0.0828773	0.917123	0.826223	103.076	107.076	107.294	107.235	31.7415	8	58	1.77456e-18	6.9927	7.28033	7.64784	8.85507	9.4554	9.34499	8.89933	8.1435	7.69982	-1.3888	-1.07302	-0.669523	0.655891	1.31499	1.19377	0.704487	-0.125338	-0.61246	0.287626	0.65514	1.86237	2.4627	2.35228	1.90663	1.1508	0.707114	1.22063	1.57477	3.63604	5.51246	5.10631	3.74932	2.22037
REPS1	493	0.00835587	0.0828068	0.0911626	0.0943881	0.091659	0.908341	0.270904	40.6433	44.6433	44.8615	44.8022	1.36702	8	58	0.230251	7.2022	7.03409	6.94019	6.91352	7.15215	7.21877	7.17602	7.04737	7.30804	0.688107	-0.570107	-1.27291	-1.4725	0.313498	0.812155	0.492157	-0.470702	1.4803	-0.168108	-0.262008	-0.288675	-0.0500508	0.0165739	-0.0261805	-0.154827	0.105844	-1.12358	-1.19915	-1.22152	-1.0353	1.01155	-1.01831	-1.11329
CXCR3	494	0.0180146	0.153398	0.171412	0.588566	0.105095	0.894905	0.784439	76.8993	80.8993	81.1175	81.0582	23.9956	8	58	9.23881e-16	5.58139	5.6108	5.56203	5.54191	6.20806	7.08916	7.03986	7.27123	6.5454	-0.943809	-0.903635	-0.970267	-0.997757	-0.0876397	1.11615	1.0488	1.3649	0.373253	0.0294045	-0.0193658	-0.0394867	0.626664	1.50777	1.45847	1.68983	0.964009	1.02059	-1.01351	-1.02775	1.54399	2.84369	2.74817	3.2262
MAP3K5	495	0	0.222642	0.222642	0.466178	0	1	0.5803	93.8177	95.8177	95.8891	95.8971	10.0242	8	58	1.21172e-08	8.02679	8.14574	8.39631	8.72022	9.46951	8.84853	8.66581	7.66426	7.30209	-0.506948	-0.325932	0.0553737	0.548313	1.68857	0.743571	0.4655	-1.05864	-1.6098	0.118949	0.369512	0.693431	1.44272	0.821738	0.639013	-0.362529	-0.724706	1.08594	1.29192	1.61713	2.71832	1.76753	1.55726	-1.28568
TBX21	496	0.141987	0.131202	0.273188	0.408443	0.519739	0.480261	0.748284	79.1007	83.1007	83.3189	83.2596	11.5805	8	58	1.17036e-09	7.33319	7.29494	7.03811	7.022	6.909	6.62987	6.1503	6.06104	5.63967	1.10202	1.03794	0.607699	0.580709	0.391415	-0.0761801	-0.879552	-1.02908	-1.73496	-0.0382511	-0.295081	-0.311193	-0.424191	-0.70332	-1.18289	-1.27215	-1.69353	-1.02687	-1.22695	-1.24073	-1.34182	-1.62825	-2.27031	-2.41521
C14orf166	497	0	0.0589053	0.0589053	0.0670787	0	1	0.228291	16.6989	18.6989	18.7703	18.7783	2.14473	8	58	0.0456299	8.39148	8.39349	8.14285	8.339	8.26412	8.58776	8.4646	8.33347	8.59434	0.00933631	0.0231581	-1.70047	-0.351554	-0.866495	1.3591	0.512162	-0.389569	1.40433	0.00200994	-0.248637	-0.0524799	-0.127362	0.19628	0.07312	-0.0580081	0.202857	1.00139	-1.18808	-1.03705	-1.09229	1.14574	1.05199	-1.04103
XCR1	498	0.000860103	0.284795	0.285655	0.794004	0.00301098	0.996989	0.685707	108.268	112.268	112.486	112.427	15.7197	8	58	4.98664e-12	4.88698	4.80253	4.93091	4.7755	5.74566	6.54361	6.49796	6.5414	5.65174	-0.909681	-1.01782	-0.853431	-1.05244	0.189902	1.21171	1.15326	1.20888	0.0696255	-0.0844503	0.0439267	-0.111481	0.858681	1.65663	1.61098	1.65442	0.764755	-1.06028	1.03092	-1.08034	1.81338	3.15279	3.05459	3.14796
IL15	499	0.0830114	0.133658	0.216669	0.222577	0.383125	0.616875	0.525386	76.8041	80.8041	81.0223	80.963	1.99218	8	58	0.0634696	6.34659	6.40357	6.57925	6.73714	6.88663	6.5644	6.43121	6.60042	6.43731	-1.19426	-0.866247	0.145025	1.05393	1.91441	0.0595567	-0.707194	0.266856	-0.672077	0.0569824	0.232659	0.390552	0.540033	0.217811	0.0846129	0.253823	0.0907132	1.04029	1.175	1.3109	1.45401	1.16297	1.0604	1.19236
SMAD2	500	0.000716241	0.0951789	0.0958952	0.115111	0.007469	0.992531	0.278437	44.9451	48.9451	49.1633	49.104	2.67032	8	58	0.0143793	8.427	8.46434	8.44854	8.41914	8.27634	8.21812	8.42515	7.75849	8.01755	0.637339	0.791603	0.726326	0.604892	0.0148654	-0.225655	0.629699	-2.1247	-1.05437	0.0373372	0.021538	-0.00785333	-0.15066	-0.208875	-0.00184919	-0.668511	-0.409452	1.02622	1.01504	-1.00546	-1.11008	-1.15579	-1.00128	-1.58943
ITLN2	501	0	0.19478	0.19478	0.535507	0	1	0.680358	86.0635	88.0635	88.1349	88.1429	15.4316	8	58	7.07101e-12	5.04419	4.89827	5.03263	4.82537	5.99797	6.37146	6.12324	6.2284	5.80103	-0.867212	-1.09846	-0.885528	-1.21399	0.644336	1.23624	0.842867	1.00953	0.33222	-0.145916	-0.0115575	-0.218816	0.95378	1.32727	1.07905	1.18421	0.756836	-1.10643	-1.00804	-1.16378	1.93694	2.50927	2.11265	2.2724
NCAM1	502	0.0331752	0.204586	0.237761	0.596992	0.139532	0.860468	0.719473	94.7924	98.7924	99.0105	98.9512	16.0104	8	58	3.51987e-12	5.18662	5.20643	5.29984	5.16501	6.14825	6.74712	6.60678	6.28205	5.85677	-1.01029	-0.979341	-0.833387	-1.04405	0.492252	1.42799	1.2087	0.701316	0.0368204	0.0198089	0.11322	-0.0216073	0.961629	1.5605	1.42016	1.09543	0.670153	1.01383	1.08164	-1.01509	1.94751	2.94956	2.67615	2.13677
MAP2K6	503	0.012695	0.104007	0.116702	0.139637	0.108781	0.891219	0.384717	54.4951	58.4951	58.7133	58.654	2.83802	8	58	0.00992637	6.36924	6.29916	6.18015	5.93014	6.44229	6.56723	6.23772	6.02268	6.07749	0.64395	0.30463	-0.271521	-1.4819	0.997584	1.60249	0.00720217	-1.03389	-0.768536	-0.0700879	-0.189094	-0.439103	0.0730445	0.197989	-0.131523	-0.346564	-0.291754	-1.04978	-1.14005	-1.35576	1.05193	1.1471	-1.09545	-1.27153
ABL1	504	0.0276135	0.292654	0.320268	1.30831	0.0862201	0.91378	0.813707	113.66	117.66	117.878	117.819	28.9608	8	58	1.44152e-17	4.87977	4.83432	5.02238	4.65865	5.67731	6.89262	6.98845	7.83005	6.81007	-0.907246	-0.945603	-0.786902	-1.09385	-0.234207	0.791377	0.872247	1.58247	0.721714	-0.0454533	0.142605	-0.221121	0.797542	2.01285	2.10868	2.95028	1.9303	-1.03201	1.1039	-1.16564	1.73814	4.03577	4.31295	7.72899
BCL2L11	505	0.031223	0.094025	0.125248	0.152527	0.249289	0.750711	0.5059	52.9675	56.9675	57.1856	57.1263	4.09529	8	58	0.000640664	7.17894	7.30927	7.50991	7.45025	7.46497	7.59805	7.73953	7.98039	7.42239	-1.43464	-0.881668	-0.0304139	-0.283542	-0.22108	0.343555	0.943813	1.96572	-0.401744	0.130334	0.330972	0.27131	0.286032	0.419115	0.560594	0.801454	0.24345	1.09455	1.25786	1.2069	1.21928	1.33711	1.47488	1.74286
VCAM1	506	0.00692622	0.333888	0.340814	0.453641	0.0203226	0.979677	0.364462	118.413	122.413	122.632	122.572	3.80786	8	58	0.00118712	4.81572	4.84276	4.80331	4.65523	5.40888	5.65323	5.5428	5.73018	4.75028	-0.724601	-0.662959	-0.752889	-1.09043	0.627499	1.18448	0.932758	1.35989	-0.873759	0.0270423	-0.0124098	-0.160488	0.593165	0.837514	0.727082	0.914466	-0.0654354	1.01892	-1.00864	-1.11767	1.50855	1.78697	1.65529	1.88487
MMP9	507	0.512205	0.487718	0.999923	1.80825	0.512244	0.487756	0.788564	155.067	159.067	159.285	159.226	19.2296	8	58	9.5607e-14	7.55389	8.06806	9.03993	8.24963	8.989	9.65946	10.8001	10.4709	10.9703	-1.41307	-0.999629	-0.218155	-0.853627	-0.259111	0.280001	1.19714	0.932431	1.33402	0.514169	1.48604	0.695744	1.43511	2.10557	3.24616	2.91696	3.4164	1.42817	2.8012	1.61972	2.70403	4.30368	9.48838	7.55254
NT5E	508	0	0.334863	0.334863	0.501224	0	1	0.41289	117.491	119.491	119.562	119.57	5.09863	8	58	7.92012e-05	4.83122	4.80253	4.80331	4.65523	4.68705	5.47258	6.04226	5.78093	5.44195	-0.645917	-0.700854	-0.699372	-0.982905	-0.921977	0.582125	1.6729	1.17254	0.52346	-0.0286919	-0.0279179	-0.175996	-0.144176	0.641359	1.21103	0.949707	0.610721	-1.02009	-1.01954	-1.12974	-1.1051	1.5598	2.31503	1.93148
CFB	509	0.0260655	0.312753	0.338819	0.486109	0.0769304	0.92307	0.462121	117.149	121.149	121.367	121.308	4.88819	8	58	0.000121743	4.81572	4.80253	4.87509	4.74262	4.63725	5.70029	5.45742	6.08257	4.85037	-0.571836	-0.597709	-0.455319	-0.715282	-0.922071	1.16415	0.687511	1.91438	-0.50382	-0.0131838	0.0593716	-0.0730933	-0.178463	0.884577	0.641704	1.26686	0.0346581	-1.00918	1.04201	-1.05197	-1.13168	1.84622	1.56017	2.40637
MAPK1	510	0	0.099066	0.099066	0.180819	0	1	0.518534	46.8505	48.8505	48.922	48.93	7.80819	8	58	4.7319e-07	9.7966	9.87652	9.98468	9.84291	9.80708	9.3279	9.52346	8.80863	9.04509	0.580645	0.774292	1.03638	0.692865	0.606022	-0.555114	-0.0812416	-1.81342	-1.24043	0.0799137	0.188072	0.0463106	0.0104727	-0.468702	-0.273146	-0.987977	-0.751515	1.05695	1.13924	1.03262	1.00729	-1.38386	-1.20844	-1.9834
MKNK1	511	0.0370078	0.192132	0.22914	1.07866	0.161507	0.838493	0.854976	91.8587	95.8587	96.0769	96.0176	38.4494	8	58	1.95445e-20	7.16857	7.47258	7.68641	8.56211	9.18265	9.65778	9.46021	8.72075	8.6475	-1.50856	-1.16578	-0.924685	0.0626964	0.762373	1.2981	1.07532	0.241566	0.158968	0.304007	0.517835	1.39354	2.01408	2.48921	2.29163	1.55218	1.47892	1.23457	1.43181	2.62722	4.03922	5.6147	4.8961	2.93259
BLNK	512	0	0.107706	0.107706	0.120436	0	1	0.214102	51.7003	53.7003	53.7717	53.7798	1.97512	8	58	0.0658405	6.24574	6.2301	6.21539	6.32212	6.20886	6.07505	5.8542	5.99392	5.41024	0.646752	0.591768	0.540054	0.915226	0.517115	0.0468082	-0.729448	-0.238358	-2.28992	-0.0156435	-0.0303563	0.0763829	-0.0368828	-0.170689	-0.39154	-0.251821	-0.835505	-1.0109	-1.02126	1.05437	-1.02589	-1.1256	-1.31179	-1.19071
CXCR2	513	0.0926394	0.592409	0.685049	1.26284	0.13523	0.86477	0.615548	156.316	160.316	160.534	160.474	8.63034	8	58	1.15547e-07	9.94469	10.385	10.7295	10.8641	11.9029	10.7874	10.0374	8.65795	8.40828	-0.223748	0.176582	0.489724	0.612111	1.5565	0.542352	-0.139483	-1.39353	-1.6205	0.440357	0.784809	0.919432	1.95824	0.842698	0.0926894	-1.28674	-1.53641	1.35694	1.72286	1.89137	3.88589	1.7934	1.06636	-2.43977
GZMK	514	0.371698	0.142492	0.514191	0.879438	0.72288	0.27712	0.874019	89.6129	93.6129	93.8311	93.7718	32.7464	8	58	8.6247e-19	7.67157	7.66965	7.19946	7.00057	6.7072	6.42319	5.58932	5.43742	5.06966	1.17722	1.17525	0.690458	0.485404	0.182926	-0.109904	-0.969654	-1.12626	-1.50544	-0.00191765	-0.472114	-0.670996	-0.964369	-1.24838	-2.08225	-2.23415	-2.60191	-1.00133	-1.38714	-1.59217	-1.95121	-2.37575	-4.23469	-4.70485
CSF3	515	0.0397657	0.270488	0.310254	0.601836	0.128171	0.871829	0.630942	110.607	114.607	114.825	114.766	10.2728	8	58	8.24143e-09	5.05	5.19978	5.0708	5.07434	5.4406	6.20213	6.47716	6.73732	5.6042	-0.915154	-0.68697	-0.883465	-0.878084	-0.320095	0.840092	1.25909	1.65544	-0.070852	0.149778	0.0208001	0.0243326	0.390592	1.15213	1.42715	1.68732	0.554193	1.1094	1.01452	1.01701	1.31093	2.22242	2.68915	3.22058
DPP4	516	0.0580119	0.111061	0.169073	0.253404	0.343117	0.656883	0.652419	65.0673	69.0673	69.2855	69.2262	8.75319	8	58	9.40914e-08	6.70774	6.57316	6.51479	6.50991	6.331	5.85004	5.77911	6.0317	5.47158	1.19341	0.879216	0.742936	0.731561	0.313859	-0.808982	-0.974583	-0.38488	-1.69254	-0.134583	-0.192957	-0.19783	-0.376748	-0.857704	-0.928637	-0.676044	-1.23617	-1.09778	-1.1431	-1.14697	-1.29841	-1.81215	-1.90348	-1.59775
IRAK4	517	0.0127956	0.126743	0.139539	0.167105	0.0916996	0.9083	0.369675	65.3326	69.3326	69.5508	69.4915	2.82607	8	58	0.0101919	7.1991	7.46331	7.43809	7.45876	7.69243	7.46606	7.83554	7.46685	6.72953	-0.696486	0.149463	0.0686981	0.134894	0.883064	0.158267	1.34128	0.160801	-2.19998	0.264208	0.238984	0.259658	0.493328	0.266958	0.636438	0.267749	-0.469574	1.20098	1.18016	1.19719	1.40769	1.20327	1.55449	1.20393
SKI	518	0.124005	0.545385	0.66939	1.17154	0.185251	0.814749	0.622886	153.101	157.101	157.319	157.259	9.07127	8	58	5.56226e-08	5.13353	5.18584	5.47718	4.97537	5.0075	6.27983	6.5214	7.82053	6.93321	-0.782406	-0.730761	-0.44314	-0.938547	-0.90683	0.349275	0.58776	1.87032	0.994327	0.0523121	0.343649	-0.158158	-0.126032	1.1463	1.38787	2.687	1.79969	1.03693	1.26896	-1.11586	-1.09129	2.21346	2.61692	6.43973
PTPN6	519	0.0241473	0.0894578	0.113605	0.170894	0.212554	0.787446	0.578054	49.0535	53.0535	53.2716	53.2124	6.66794	8	58	3.72189e-06	8.50806	8.56431	8.73429	8.72598	9.0054	9.04054	9.39366	8.7884	8.9645	-1.2795	-1.07402	-0.453142	-0.483502	0.537128	0.665493	1.95531	-0.255497	0.387728	0.0562524	0.226233	0.217921	0.497341	0.532483	0.8856	0.280342	0.456439	1.03976	1.16978	1.16306	1.41161	1.44642	1.84753	1.21448
DAXX	520	0.0575034	0.163825	0.221328	0.439563	0.25981	0.74019	0.701699	85.4561	89.4561	89.6742	89.6149	12.4486	8	58	3.42144e-10	5.45616	5.55806	5.57421	5.58783	5.86679	6.58434	6.64711	6.8579	6.46583	-1.08453	-0.903454	-0.874744	-0.850548	-0.35484	0.920259	1.03181	1.40638	0.709662	0.1019	0.118056	0.131672	0.410628	1.12818	1.19096	1.40175	1.00967	1.07319	1.08527	1.09556	1.32926	2.18583	2.28304	2.64221
IFNA1/13	521	0.00206498	0.222101	0.224166	0.258408	0.00921182	0.990788	0.251095	94.1873	98.1873	98.4055	98.3462	2.26946	8	58	0.0347583	4.81572	4.80253	4.80331	4.66063	4.45425	5.19271	5.02116	5.39766	4.48699	-0.104678	-0.146994	-0.14451	-0.60245	-1.2649	1.10538	0.55473	1.76321	-1.15979	-0.0131838	-0.0124098	-0.155082	-0.36147	0.376996	0.20544	0.581945	-0.328723	-1.00918	-1.00864	-1.11348	-1.28473	1.29864	1.15304	1.49687
MX2	522	0.0314077	0.515402	0.546809	6.15642	0.057438	0.942562	0.929368	145.318	149.318	149.537	149.477	90.8879	8	58	6.10235e-30	7.83667	8.60082	8.50009	12.448	13.176	13.3986	12.9753	12.0221	11.7427	-1.50342	-1.16072	-1.20589	0.564678	0.891171	0.991007	0.801151	0.373661	0.24836	0.764143	0.663416	4.61131	5.3393	5.56191	5.13858	4.18539	3.906	1.69836	1.58383	24.4423	40.4845	47.239	35.2262	18.194
BTLA	523	0.00751459	0.108992	0.116507	0.192903	0.0644992	0.935501	0.52497	55.5033	59.5033	59.7214	59.6622	6.92204	8	58	2.32419e-06	7.05685	6.8241	6.7351	6.53715	6.49493	6.35795	6.24034	6.29422	5.82558	1.57464	0.933582	0.688465	0.143258	0.026972	-0.350292	-0.674217	-0.525833	-1.81657	-0.232752	-0.321748	-0.5197	-0.56192	-0.698896	-0.816505	-0.76263	-1.23127	-1.17507	-1.24984	-1.43366	-1.47623	-1.62326	-1.76113	-1.69658
MAPK3	524	0.0724645	0.105906	0.178371	0.197394	0.406257	0.593743	0.576688	63.8756	67.8756	68.0938	68.0345	2.99633	8	58	0.00699762	7.7287	7.72516	8.1115	7.73787	8.04846	7.65341	8.23117	7.78523	8.06653	-0.796469	-0.813045	0.997287	-0.753499	0.701925	-1.14926	1.55805	-0.531556	0.786569	-0.00353734	0.3828	0.00917002	0.319767	-0.075288	0.502469	0.0565343	0.337831	-1.00245	1.30387	1.00638	1.24813	-1.05357	1.41664	1.03996
CD9	525	0.135913	0.100345	0.236258	0.291716	0.575275	0.424725	0.731138	64.9742	68.9742	69.1924	69.1331	7.68022	8	58	5.92657e-07	10.4997	10.5605	10.6748	10.6718	10.6169	9.7482	10.3034	9.93701	10.2761	0.403824	0.586522	0.930196	0.921081	0.756211	-1.85536	-0.186438	-1.28775	-0.26828	0.0607741	0.175096	0.172064	0.117221	-0.751511	-0.196349	-0.562698	-0.223573	1.04303	1.12904	1.12667	1.08464	-1.68356	-1.14579	-1.47703
AICDA	526	0.00314207	0.133158	0.1363	0.14384	0.0230525	0.976947	0.202274	65.2335	69.2335	69.4516	69.3923	1.49059	8	58	0.180609	4.81572	4.80253	4.80331	4.65865	4.45425	4.83171	4.40608	4.65663	4.48159	0.93139	0.854161	0.858696	0.0113265	-1.18604	1.02505	-1.46822	-0.000517718	-1.02585	-0.0131838	-0.0124098	-0.157066	-0.36147	0.0159885	-0.409641	-0.159088	-0.334124	-1.00918	-1.00864	-1.11502	-1.28473	1.01114	-1.32836	-1.11658
CD207	527	0.00825887	0.19171	0.199969	0.201461	0.0413008	0.958699	0.189902	87.2444	91.2444	91.4626	91.4033	1.09499	8	58	0.379899	4.81572	4.80253	4.80331	4.65523	5.02932	5.17036	4.87202	5.07109	4.53566	-0.22801	-0.293393	-0.289554	-1.02392	0.831312	1.53076	0.0512349	1.03846	-1.61689	-0.0131838	-0.0124098	-0.160488	0.213602	0.354639	0.056307	0.255372	-0.280054	-1.00918	-1.00864	-1.11767	1.15958	1.27867	1.0398	1.19364
BID	528	0.0509215	0.169252	0.220174	0.690052	0.231279	0.768721	0.802889	86.5651	90.5651	90.7833	90.724	24.9006	8	58	4.13586e-16	8.39833	8.61807	8.84057	9.12214	9.67306	10.1099	10.412	9.9915	9.91789	-1.45663	-1.15334	-0.846256	-0.457632	0.302733	0.905618	1.32262	0.742236	0.640648	0.219744	0.442238	0.723812	1.27473	1.71154	2.01368	1.59316	1.51956	1.16453	1.35871	1.65154	2.41953	3.2751	4.0381	3.0171
CTSC	529	0.0793385	0.277821	0.35716	1.61016	0.222137	0.777863	0.861139	115.053	119.053	119.271	119.211	37.6383	8	58	3.25312e-20	7.03823	7.06551	6.93184	7.10222	7.72104	9.38846	9.90021	9.57782	9.60367	-0.928626	-0.907875	-1.00957	-0.879942	-0.409128	0.859494	1.24885	1.00356	1.02323	0.0272744	-0.10639	0.0639881	0.682805	2.35023	2.86198	2.53958	2.56544	1.01908	-1.07653	1.04535	1.60526	5.09904	7.27011	5.81421
ATG16L1	530	0.035723	0.432585	0.468308	0.628308	0.0762811	0.923719	0.424247	135.936	139.936	140.154	140.095	4.19531	8	58	0.000517824	5.01758	5.01487	5.21892	4.93278	5.31579	5.98789	5.85523	6.54715	5.51014	-0.867368	-0.872345	-0.496857	-1.02341	-0.318606	0.918177	0.67406	1.94731	0.0390342	-0.00270486	0.201345	-0.0847959	0.298212	0.970314	0.837654	1.52957	0.492564	-1.00188	1.14977	-1.06054	1.22962	1.95927	1.78714	2.887
KIR3DL3	531	0.0689223	0.890335	0.959257	2.11001	0.0718496	0.92815	0.646449	177.624	181.624	181.842	181.783	11.8269	8	58	8.21274e-10	4.88837	4.82725	4.80331	4.65523	5.14728	6.93275	6.69466	8.59148	7.11082	-0.761797	-0.805196	-0.822195	-0.927338	-0.577953	0.68983	0.520772	1.86761	0.816263	-0.061121	-0.0850603	-0.233139	0.258915	2.04439	1.8063	3.70311	2.22245	-1.04328	-1.06073	-1.17539	1.19658	4.12498	3.49743	13.0241
CEACAM6	532	0.00275482	0.250317	0.253072	0.576013	0.0108855	0.989114	0.621895	101.214	105.214	105.432	105.372	11.6971	8	58	9.89189e-10	4.86917	4.9298	5.02789	4.71951	5.62142	5.89369	6.40198	6.42987	5.71943	-0.979709	-0.887389	-0.738017	-1.20762	0.165827	0.580439	1.35447	1.39694	0.315068	0.0606246	0.158714	-0.149667	0.75225	1.02452	1.53281	1.56069	0.850253	1.04292	1.11629	-1.10931	1.68442	2.03428	2.89348	2.94996
PRKCA	533	0.0565257	0.144906	0.201431	0.211538	0.28062	0.71938	0.453177	78.8923	82.8923	83.1105	83.0512	1.6296	8	58	0.13628	6.31072	6.07146	5.91266	6.0887	6.02629	5.96037	6.14221	5.73129	5.61812	1.54671	0.411813	-0.341475	0.493569	0.197549	-0.11514	0.747376	-1.20181	-1.73859	-0.239254	-0.39806	-0.222019	-0.284424	-0.350345	-0.168512	-0.579432	-0.692594	-1.18038	-1.31773	-1.16636	-1.21792	-1.27487	-1.1239	-1.49426
CCL1	534	0.0111187	0.384059	0.395178	0.48966	0.0281358	0.971864	0.326576	126.922	130.922	131.14	131.08	3.05358	8	58	0.00616753	4.81572	4.80419	4.80331	4.65523	4.84715	5.52813	4.85952	6.09905	5.17405	-0.533024	-0.55765	-0.559543	-0.875978	-0.465853	0.989369	-0.439417	2.20938	0.232714	-0.0115236	-0.0124098	-0.160488	0.0314335	0.712417	0.0438042	1.28333	0.358334	-1.00802	-1.00864	-1.11767	1.02203	1.63855	1.03083	2.43401
HFE	535	0	0.264052	0.264052	0.315463	0	1	0.264427	103.711	105.711	105.783	105.791	2.60626	8	58	0.0165651	4.82836	4.84112	4.91374	4.84226	5.04279	5.28234	5.32018	5.87688	4.48415	-0.547896	-0.516055	-0.33489	-0.513224	-0.0129462	0.584663	0.679068	2.0679	-1.40662	0.012763	0.0853814	0.0138976	0.21443	0.453976	0.491818	1.04852	-0.344214	1.00889	1.06097	1.00968	1.16025	1.36981	1.40622	2.06841
KLRC2	536	0.1389	0.287301	0.426201	0.483936	0.325903	0.674097	0.528411	119.759	123.759	123.977	123.918	3.31916	8	58	0.00343903	5.87767	6.13761	5.91909	5.25881	5.75212	5.47683	5.67464	4.96836	4.52594	0.716006	1.22238	0.796684	-0.48956	0.471433	-0.0648506	0.3205	-1.05537	-1.91723	0.259943	0.0414153	-0.618861	-0.125548	-0.400842	-0.203028	-0.909314	-1.35173	1.19743	1.02912	-1.53566	-1.09092	-1.32028	-1.15111	-1.87815
MS4A2	537	0	0.206429	0.206429	0.230162	0	1	0.211828	89.4324	91.4324	91.5038	91.5118	1.94851	8	58	0.0697076	4.91859	4.99391	4.88341	4.78294	5.02127	4.95403	4.25284	4.55388	4.48415	0.588271	0.868658	0.457306	0.0833269	0.970515	0.720215	-1.88999	-0.769369	-1.02894	0.0753222	-0.0351821	-0.135647	0.102685	0.0354451	-0.665751	-0.364712	-0.434442	1.0536	-1.02469	-1.09859	1.07377	1.02487	-1.58639	-1.28762
CASP2	538	0.0107454	0.0751305	0.0858759	0.164928	0.125127	0.874873	0.625608	36.205	40.205	40.4232	40.3639	10.1143	8	58	1.05314e-08	6.7341	6.65839	6.59492	6.69966	6.5605	6.24323	5.89999	5.94872	5.54937	0.961268	0.785086	0.63741	0.88112	0.557319	-0.180933	-0.979597	-0.866219	-1.79545	-0.0757164	-0.139182	-0.0344446	-0.173603	-0.490876	-0.834112	-0.785387	-1.18474	-1.05388	-1.10128	-1.02416	-1.12787	-1.4053	-1.78276	-1.72355
OAS1	539	0.110698	0.846161	0.956859	11.6296	0.115689	0.884311	0.94003	176.323	180.323	180.541	180.482	105.396	8	58	1.15291e-31	4.9395	5.16504	5.49992	9.50328	12.118	12.4597	11.8075	11.8444	11.0327	-1.36677	-1.29726	-1.19405	0.0397064	0.845508	0.950804	0.749812	0.761204	0.511046	0.225538	0.560421	4.56378	7.17848	7.52016	6.86797	6.90493	6.09321	1.16921	1.4747	23.6503	144.857	183.566	116.806	119.837
CCL13	540	0	0.226493	0.226493	0.24741	0	1	0.195508	94.8124	96.8124	96.8838	96.8918	1.7619	8	58	0.10355	4.81572	4.80253	4.80331	4.65523	4.9022	5.28042	4.39514	4.91701	4.50335	0.115456	0.0640578	0.0670755	-0.510225	0.45264	1.92717	-1.5242	0.510378	-1.10236	-0.0131838	-0.0124098	-0.160488	0.086488	0.464708	-0.420573	0.101298	-0.312371	-1.00918	-1.00864	-1.11767	1.06178	1.38004	-1.33846	1.07274
CCL4	541	0.000247276	0.505747	0.505995	0.929677	0.000488692	0.999511	0.522165	141.433	145.433	145.651	145.592	7.90954	8	58	3.96358e-07	5.59235	5.77412	5.49736	5.42375	5.23381	6.81675	6.61272	7.73053	6.64752	-0.660815	-0.444517	-0.773863	-0.861451	-1.08748	0.796224	0.553428	1.88363	0.594843	0.181762	-0.0949979	-0.168601	-0.358539	1.2244	1.02037	2.13818	1.05517	1.13427	-1.06806	-1.12397	-1.28213	2.33658	2.02843	4.40205
CD160	542	0	0.294402	0.294402	0.475952	0	1	0.456423	110.022	112.022	112.093	112.101	6.08757	8	58	1.11866e-05	4.82264	4.80253	5.04379	4.70982	4.75175	5.74548	5.3323	6.3771	5.27594	-0.691121	-0.727296	-0.293287	-0.894079	-0.818653	0.969048	0.225736	2.10531	0.124342	-0.0201092	0.221145	-0.112819	-0.0708919	0.922843	0.509656	1.55446	0.453293	-1.01404	1.16566	-1.08134	-1.05037	1.89585	1.42371	2.93724
MAP3K9	543	0	0.220696	0.220696	0.224926	0	1	0.137739	93.3084	95.3084	95.3798	95.3879	1.15813	8	58	0.3399	4.89334	4.9096	4.88797	4.83156	4.96623	5.11377	5.40017	4.72336	4.50335	-0.0848247	-0.0192538	-0.106453	-0.333947	0.20912	0.804127	1.95914	-0.770306	-1.6576	0.0162592	-0.00536308	-0.0617735	0.0728879	0.220428	0.50683	-0.169975	-0.389992	1.01133	-1.00372	-1.04375	1.05182	1.16508	1.42092	-1.12504
AHR	544	0.0685328	0.144693	0.213226	1.11598	0.32141	0.67859	0.896962	79.8616	83.8616	84.0798	84.0205	53.9983	8	58	4.58418e-24	7.9353	7.60614	7.93034	7.75321	6.80474	5.84557	5.78107	5.29433	4.65777	1.04351	0.781736	1.03957	0.898699	0.144402	-0.6184	-0.669698	-1.05679	-1.56303	-0.329158	-0.00495299	-0.182085	-1.13056	-2.08973	-2.15423	-2.64097	-3.27753	-1.25628	-1.00344	-1.13452	-2.18944	-4.25668	-4.45131	-6.2375
KLRC1	545	0.0611377	0.20805	0.269187	0.254031	0.227119	0.772881	0.341404	98.4192	102.419	102.637	102.578	0.828161	8	58	0.58138	5.42081	5.40816	5.22905	5.27703	5.61144	5.28863	5.64088	5.58603	5.08438	0.139657	0.0736382	-0.860857	-0.61052	1.13425	-0.550002	1.28784	1.00166	-1.61567	-0.0126534	-0.191763	-0.143782	0.190628	-0.132183	0.220066	0.165214	-0.336432	-1.00881	-1.14216	-1.1048	1.14126	-1.09595	1.16479	1.12133
IFI16	546	0	0.285467	0.285467	1.90207	0	1	0.868109	108.234	110.234	110.306	110.314	47.7197	8	58	1.00933e-22	9.51049	9.64705	9.5087	11.7528	12.5867	12.3506	11.8132	11.0172	10.6275	-1.20043	-1.08882	-1.20188	0.632112	1.31358	1.12061	0.681494	0.0309159	-0.287577	0.136559	-0.00178269	2.24233	3.07618	2.84007	2.30275	1.50669	1.11698	1.09928	-1.00124	4.73159	8.43378	7.16052	4.93398	2.84158
IL1RN	547	0.0641402	1.21879	1.28293	6.93899	0.0499952	0.950005	0.851223	194.914	198.914	199.132	199.072	39.4956	8	58	1.02615e-20	5.86146	6.00044	6.30314	8.81266	11.129	11.9769	10.7265	9.59684	8.79828	-1.27411	-1.21387	-1.08265	0.00523753	1.00937	1.37696	0.834878	0.345178	-0.000995341	0.138978	0.441676	2.9512	5.26752	6.11548	4.86501	3.73537	2.93682	1.10113	1.35818	7.73392	38.5195	69.3336	29.1416	13.3186
CD28	548	0.0293161	0.197131	0.226447	0.295565	0.129461	0.870539	0.452523	92.302	96.302	96.5202	96.4609	4.16996	8	58	0.000546481	6.72475	6.49301	6.40812	6.33013	6.30133	6.06245	5.83485	5.82392	5.36132	1.37401	0.821096	0.618551	0.432464	0.363744	-0.206218	-0.749241	-0.775327	-1.87908	-0.231738	-0.316629	-0.394622	-0.423424	-0.662306	-0.889898	-0.900832	-1.36344	-1.17425	-1.24542	-1.3146	-1.34111	-1.58261	-1.85305	-1.86714
CXCL1	549	0.0732963	0.344905	0.418201	1.2218	0.175266	0.824734	0.770853	126.221	130.221	130.439	130.38	20.9086	8	58	1.71337e-14	4.86571	4.89562	4.94866	4.78242	5.409	6.24668	7.24806	7.7268	6.57814	-0.877142	-0.850634	-0.803639	-0.950937	-0.395765	0.346436	1.23369	1.65787	0.640122	0.0299173	0.0829573	-0.083288	0.543298	1.38097	2.38235	2.8611	1.71243	1.02095	1.05919	-1.05943	1.4573	2.60443	5.21386	7.26568
CASP8	550	0.00917235	0.119148	0.128321	0.330466	0.0714798	0.92852	0.697853	60.9575	64.9575	65.1756	65.1163	14.6052	8	58	1.97129e-11	9.53475	9.75037	9.82538	9.71794	9.96556	8.92483	8.73592	8.59047	8.30248	0.44033	0.78698	0.907575	0.734839	1.13293	-0.540214	-0.843928	-1.07776	-1.54076	0.215622	0.290634	0.183189	0.43081	-0.609913	-0.798827	-0.944272	-1.23227	1.1612	1.22318	1.13539	1.34799	-1.52617	-1.73969	-1.92422
FASLG	551	0.0127356	0.317597	0.330332	0.330286	0.0385539	0.961446	0.18003	116.396	120.396	120.614	120.555	0.974013	8	58	0.465303	5.13213	5.48665	5.08393	5.1251	5.42747	5.47986	5.23725	5.56767	4.59954	-0.35196	0.829581	-0.512586	-0.375388	0.632341	0.806972	-0.00160677	1.09962	-2.12698	0.354517	-0.0481955	-0.00702974	0.295336	0.347733	0.105122	0.435542	-0.532588	1.27856	-1.03397	-1.00488	1.22717	1.27256	1.07559	1.35242
CD46	552	0.0249214	0.139728	0.164649	0.260375	0.151361	0.848639	0.562028	73.0636	77.0636	77.2817	77.2225	6.71462	8	58	3.41182e-06	10.0267	10.1125	9.85817	9.92617	10.2749	9.87698	9.59302	8.94725	8.50556	0.594731	0.742078	0.305546	0.422246	1.0207	0.337833	-0.149503	-1.2578	-2.01583	0.0858554	-0.168501	-0.100503	0.248203	-0.149688	-0.433646	-1.07942	-1.52111	1.06132	-1.12389	-1.07215	1.18773	-1.10933	-1.35064	-2.11319
ITGAM	553	0.0789842	0.255847	0.334832	1.78528	0.235892	0.764108	0.884912	110.658	114.658	114.877	114.817	49.3202	8	58	4.4457e-23	7.77505	8.17823	8.52875	8.81381	10.1591	10.6556	11.1747	10.5991	10.4698	-1.43992	-1.12092	-0.843571	-0.618025	0.446387	0.839233	1.24998	0.794585	0.692254	0.403179	0.753701	1.03876	2.38401	2.88051	3.39963	2.82408	2.69475	1.32242	1.68611	2.05446	5.21986	7.3641	10.5533	7.08163
GPR183	554	0.0321158	0.112061	0.144177	0.974961	0.222753	0.777247	0.907509	62.4099	66.4099	66.6281	66.5688	63.0624	8	58	8.80187e-26	9.3629	9.09907	8.94538	8.82607	8.09898	7.35646	6.82629	6.93128	6.76037	1.25514	1.00801	0.864044	0.752283	0.0711882	-0.624349	-1.12097	-1.02262	-1.18272	-0.263824	-0.417511	-0.536822	-1.26392	-2.00644	-2.5366	-2.43161	-2.60252	-1.20066	-1.33562	-1.45077	-2.40147	-4.01789	-5.80222	-5.39496
GNGT1	555	0	0.218321	0.218321	0.229706	0	1	0.164765	92.6811	94.6811	94.7525	94.7605	1.4302	8	58	0.203569	4.86571	4.84112	4.92343	4.65523	4.73807	5.33384	4.69017	4.78718	4.72574	0.12548	0.0052349	0.407857	-0.904116	-0.498877	2.41545	-0.733186	-0.258642	-0.559203	-0.0245815	0.0577256	-0.210478	-0.127636	0.468133	-0.175535	-0.0785252	-0.139968	-1.01718	1.04082	-1.15707	-1.0925	1.38332	-1.12938	-1.05594
NUP107	556	0.022608	0.0869853	0.109593	0.108295	0.20629	0.79371	0.351857	47.2473	51.2473	51.4655	51.4062	1.06816	8	58	0.397869	6.52504	6.42109	6.30334	6.34574	6.48416	6.38166	6.27061	6.16507	6.21257	1.49061	0.627657	-0.34975	0.00222142	1.15124	0.300361	-0.621451	-1.49758	-1.10331	-0.103955	-0.221699	-0.179299	-0.0408814	-0.143383	-0.25443	-0.359973	-0.312477	-1.07472	-1.16611	-1.13233	-1.02874	-1.10449	-1.19286	-1.2834
IFITM1	557	0.0573646	0.474826	0.532191	2.39567	0.10779	0.89221	0.83622	142.532	146.532	146.75	146.691	33.3536	8	58	5.62506e-19	10.9772	11.222	10.9216	12.897	14.1832	14.2651	13.6222	12.9879	13.1003	-1.28755	-1.10315	-1.32946	0.158722	1.12772	1.18944	0.705094	0.227229	0.311941	0.244772	-0.0556295	1.91974	3.20596	3.28789	2.64498	2.01067	2.12312	1.18491	-1.03931	3.78355	9.22766	9.76685	6.25487	4.02971
CD3G	558	0.0692962	0.184432	0.253729	0.85057	0.273111	0.726889	0.826747	92.6835	96.6835	96.9017	96.8424	29.5438	8	58	9.1744e-18	8.66015	8.63058	8.23991	8.34386	7.85617	6.89919	6.55513	6.52404	6.28686	1.12921	1.09901	0.699792	0.80601	0.307653	-0.670252	-1.02184	-1.05361	-1.29598	-0.0295605	-0.420232	-0.316287	-0.803977	-1.76095	-2.10501	-2.1361	-2.37329	-1.0207	-1.33814	-1.24512	-1.74591	-3.38922	-4.30202	-4.39573
C8A	559	0	0.194166	0.194166	0.196646	0	1	0.132295	85.8802	87.8802	87.9517	87.9597	1.10538	8	58	0.373098	4.86571	4.90784	4.88443	4.75834	5.01826	5.23457	4.65542	4.84472	4.50335	0.0633083	0.265516	0.153164	-0.451939	0.795368	1.83344	-0.945838	-0.037404	-1.67561	0.0421366	0.0187244	-0.107369	0.152549	0.368864	-0.210289	-0.0209867	-0.362361	1.02964	1.01306	-1.07726	1.11153	1.29134	-1.15692	-1.01465
CCR2	560	0	0.260637	0.260637	0.394597	0	1	0.419547	102.956	104.956	105.028	105.036	5.24024	8	58	5.94612e-05	6.88827	7.10481	7.13137	7.38658	8.1771	7.13764	6.94143	6.83134	6.57659	-0.53313	-0.056688	0.00177219	0.563303	2.30272	0.0155474	-0.416179	-0.658409	-1.21893	0.216531	0.2431	0.498302	1.28882	0.249361	0.0531514	-0.0569359	-0.31168	1.16194	1.18353	1.41255	2.44329	1.18868	1.03753	-1.04025
TNFRSF4	561	0.0461531	0.452016	0.498169	1.08323	0.0926454	0.907355	0.653335	139.119	143.119	143.337	143.277	11.695	8	58	9.92234e-10	4.81572	4.87731	4.84152	4.65523	5.22001	6.16893	6.40143	7.48941	6.11553	-0.828626	-0.76521	-0.802063	-0.993856	-0.412387	0.564569	0.803931	1.92406	0.509586	0.0615968	0.0258008	-0.160488	0.404295	1.35322	1.58571	2.67369	1.29981	1.04362	1.01804	-1.11767	1.32344	2.55481	3.00156	6.38061
CD163	562	0.162896	0.324678	0.487574	1.37087	0.334095	0.665905	0.812014	127.06	131.06	131.278	131.219	22.8932	8	58	2.53601e-15	7.94051	8.13387	8.60999	9.13951	10.1462	9.93531	10.2644	9.71607	11.5351	-1.34721	-1.17922	-0.765581	-0.305553	0.569011	0.385806	0.671751	0.19534	1.77566	0.19336	0.669485	1.199	2.20568	1.9948	2.32394	1.77556	3.59459	1.14342	1.59051	2.29581	4.61291	3.9856	5.00696	3.42371
EIF2AK2	563	0.0103828	0.319042	0.329425	3.08161	0.0315179	0.968482	0.911314	116.328	120.328	120.546	120.486	72.2678	8	58	2.58001e-27	7.06288	7.8228	7.78009	10.5644	11.0486	10.93	10.5954	10.028	9.46297	-1.57654	-1.08032	-1.10822	0.709915	1.02607	0.948656	0.730142	0.359624	-0.00931989	0.759928	0.717211	3.50155	3.98572	3.86717	3.53253	2.96511	2.40009	1.69341	1.644	11.3259	15.8424	14.5926	11.5717	7.80883
CD53	564	0.0394593	0.153866	0.193325	0.503945	0.204108	0.795892	0.753531	80.2639	84.2639	84.4821	84.4228	17.9171	8	58	3.94528e-13	10.5626	10.7023	10.9645	10.9459	11.9278	11.8674	12.0325	11.6378	11.5151	-1.40165	-1.15322	-0.68681	-0.719837	1.02652	0.919046	1.21278	0.510759	0.292406	0.139676	0.40191	0.383341	1.36522	1.30479	1.46994	1.07523	0.952466	1.10166	1.32126	1.30436	2.57615	2.47048	2.7701	2.10706
IL27	565	0.0933141	0.564937	0.658251	1.38665	0.141761	0.858239	0.666691	153.778	157.778	157.996	157.937	11.7239	8	58	9.51931e-10	4.8699	4.84768	4.81388	4.66572	5.71888	6.55095	6.35695	7.79058	6.33559	-0.843544	-0.864314	-0.895912	-1.03442	-0.0498784	0.727974	0.546616	1.88683	0.526643	-0.0222177	-0.0560176	-0.204177	0.848983	1.68105	1.48705	2.92068	1.46569	-1.01552	-1.03959	-1.15203	1.80123	3.20661	2.80316	7.57202
ELK1	566	0.0791187	0.786446	0.865564	1.82074	0.0914071	0.908593	0.640993	171.193	175.193	175.411	175.351	11.1593	8	58	2.16493e-09	5.08574	5.05049	5.02354	4.97379	5.50431	7.19262	6.67123	8.36961	7.16186	-0.816451	-0.844419	-0.8658	-0.905273	-0.484356	0.855138	0.441472	1.78895	0.830733	-0.0352512	-0.0622	-0.111952	0.418574	2.10688	1.58549	3.28387	2.07612	-1.02474	-1.04406	-1.08069	1.33661	4.30759	3.0011	9.73963
SMAD3	567	0.0319539	0.188553	0.220507	0.381923	0.144911	0.855089	0.59643	90.236	94.236	94.4541	94.3948	7.99058	8	58	3.44238e-07	7.24192	6.86473	6.78844	6.88658	6.94841	7.66495	8.17485	7.74556	7.62562	-0.172075	-0.936918	-1.09161	-0.892605	-0.767235	0.68571	1.71963	0.849154	0.605952	-0.377195	-0.453485	-0.355341	-0.293513	0.42303	0.932924	0.503635	0.383697	-1.29881	-1.36934	-1.27929	-1.22562	1.34074	1.90914	1.41778
HAVCR2	568	0	0.314259	0.314259	0.752886	0	1	0.633188	113.808	115.808	115.879	115.887	12.5149	8	58	3.12101e-10	4.81572	4.88237	4.89009	4.77516	5.07717	6.36536	6.25831	6.672	5.80103	-0.89683	-0.810001	-0.799943	-0.949663	-0.556227	1.12196	0.982498	1.52143	0.386777	0.0666505	0.0743714	-0.0405552	0.26145	1.54964	1.44259	1.85628	0.98531	1.04728	1.0529	-1.02851	1.19868	2.92745	2.71809	3.62073
OXER1	569	0.0110324	0.349684	0.360716	0.582541	0.0305848	0.969415	0.485478	121.602	125.602	125.82	125.761	6.26072	8	58	8.0262e-06	4.81572	4.80253	4.80331	4.65523	4.6963	5.73764	5.04259	6.59181	5.60392	-0.578457	-0.5986	-0.597417	-0.823651	-0.760903	0.830057	-0.231842	2.13506	0.625755	-0.0131838	-0.0124098	-0.160488	-0.119417	0.921924	0.226872	1.77609	0.788201	-1.00918	-1.00864	-1.11767	-1.0863	1.89464	1.1703	3.42498
TNFSF13	570	0.0398066	0.457041	0.496848	0.618347	0.0801183	0.919882	0.382903	139.278	143.278	143.496	143.437	3.21951	8	58	0.00428011	7.3022	7.57325	7.72337	7.98968	8.24417	8.20824	8.31842	7.14183	6.80863	-0.743644	-0.238329	0.0415356	0.538029	1.01247	0.945495	1.1509	-1.04263	-1.66382	0.271047	0.421164	0.68748	0.941964	0.906041	1.01622	-0.160372	-0.493577	1.20668	1.33901	1.61047	1.92114	1.8739	2.02261	-1.11758
CD22	571	0.0473051	0.331574	0.378879	0.594311	0.124856	0.875144	0.54143	122.304	126.304	126.522	126.463	6.54751	8	58	4.6632e-06	6.54063	6.29502	6.05916	5.86325	5.31468	6.43025	6.85626	7.41088	6.55958	0.285361	-0.125322	-0.519701	-0.847292	-1.76455	0.100799	0.813129	1.74051	0.317057	-0.245608	-0.481466	-0.677381	-1.22594	-0.110377	0.31563	0.870251	0.0189555	-1.18559	-1.39616	-1.59923	-2.33908	-1.07951	1.24456	1.82798
RARRES3	572	0.140872	0.334951	0.475823	1.64495	0.29606	0.70394	0.837743	127.894	131.894	132.112	132.053	28.612	8	58	1.89523e-17	7.50979	7.71426	7.20621	8.60117	9.64456	9.94951	9.3457	10.0582	10.1061	-1.1918	-1.01701	-1.45131	-0.258822	0.633121	0.893808	0.377641	0.986686	1.02768	0.204467	-0.303579	1.09139	2.13477	2.43972	1.83591	2.54837	2.59633	1.15226	-1.2342	2.13079	4.39168	5.42537	3.56998	5.84973
GZMM	573	0.0550473	0.46986	0.524907	0.972071	0.10487	0.89513	0.600192	141.816	145.816	146.035	145.975	8.80904	8	58	8.57412e-08	4.81572	4.80419	4.80331	4.66294	4.45425	5.70984	6.01753	7.22336	5.7919	-0.612223	-0.625072	-0.62606	-0.782578	-1.01527	0.384753	0.727831	2.07237	0.476249	-0.0115236	-0.0124098	-0.15278	-0.36147	0.894125	1.20181	2.40764	0.976182	-1.00802	-1.00864	-1.11171	-1.28473	1.85848	2.30028	5.30606
CX3CL1	574	0.0972218	0.709481	0.806703	1.58562	0.120517	0.879483	0.631751	166.274	170.274	170.492	170.433	10.1259	8	58	1.03437e-08	4.81572	4.80253	4.80331	4.65523	4.45425	6.35625	6.02569	7.97166	6.66056	-0.664954	-0.675907	-0.675264	-0.798281	-0.965249	0.614863	0.340248	1.95688	0.867665	-0.0131838	-0.0124098	-0.160488	-0.36147	1.54054	1.20998	3.15594	1.84484	-1.00918	-1.00864	-1.11767	-1.28473	2.90903	2.31334	8.91321
C7	575	0.0152896	0.175981	0.191271	0.238114	0.079937	0.920063	0.382915	83.9155	87.9155	88.1337	88.0744	3.29507	8	58	0.00362567	4.81572	4.80253	4.80331	4.65523	4.45425	5.06123	4.77082	5.67687	4.88857	-0.191559	-0.230275	-0.228002	-0.662861	-1.25308	0.529427	-0.323404	2.33737	0.0223835	-0.0131838	-0.0124098	-0.160488	-0.36147	0.24551	-0.0448959	0.861152	0.0728516	-1.00918	-1.00864	-1.11767	-1.28473	1.18551	-1.03161	1.81649
CD4	576	0.0238214	0.301434	0.325255	0.396664	0.0732391	0.926761	0.363668	114.863	118.863	119.081	119.022	3.02837	8	58	0.00652017	5.80954	5.68364	5.57165	5.43351	5.23135	5.93273	4.89453	6.17738	5.37062	0.625681	0.30059	0.0114387	-0.345233	-0.86719	0.943732	-1.73684	1.57542	-0.507595	-0.125908	-0.237898	-0.376037	-0.578193	0.123182	-0.91501	0.367835	-0.438921	-1.09119	-1.17927	-1.29777	-1.49298	1.08913	-1.88558	1.29042
IL3	577	0	0.169619	0.169619	0.156719	0	1	0.0488771	78.0409	80.0409	80.1124	80.1204	0.372569	8	58	0.930913	4.81572	4.80253	4.80331	4.65523	4.64712	4.85597	4.64408	4.70694	4.48415	0.869943	0.75852	0.765061	-0.486427	-0.554946	1.21018	-0.580615	-0.0493967	-1.93232	-0.0131838	-0.0124098	-0.160488	-0.168595	0.0402575	-0.171632	-0.108778	-0.331568	-1.00918	-1.00864	-1.11767	-1.12396	1.0283	-1.12633	-1.07831
PTAFR	578	0.0375932	0.166611	0.204205	0.296202	0.184096	0.815904	0.544227	84.2878	88.2878	88.506	88.4467	6.18814	8	58	9.22104e-06	8.70767	8.73449	9.18014	8.64018	9.38117	9.19974	9.77697	8.99248	9.10143	-1.02093	-0.947267	0.276798	-1.2063	0.828958	0.330645	1.91612	-0.238632	0.0606005	0.0268174	0.472468	-0.0674886	0.673496	0.492073	1.0693	0.284813	0.393756	1.01876	1.38748	-1.04789	1.59493	1.40646	2.09842	1.21825
IL20	579	0	0.188189	0.188189	0.203313	0	1	0.186581	84.0669	86.0669	86.1384	86.1464	1.663	8	58	0.12722	4.81572	4.80253	4.80331	4.65523	4.45425	5.04608	4.37855	4.84073	4.48415	0.536343	0.476357	0.479879	-0.193875	-1.10834	1.58449	-1.45274	0.650173	-0.972288	-0.0131838	-0.0124098	-0.160488	-0.36147	0.230363	-0.437163	0.0250178	-0.331568	-1.00918	-1.00864	-1.11767	-1.28473	1.17313	-1.35394	1.01749
CSF1R	580	0.199818	0.386291	0.586108	1.33956	0.340923	0.659077	0.771258	137.31	141.31	141.528	141.468	19.2833	8	58	9.03528e-14	8.01986	8.02234	8.18011	8.33441	7.81093	6.30249	5.77296	5.62892	6.08666	0.778827	0.78099	0.918879	1.05374	0.596225	-0.722135	-1.18493	-1.31082	-0.910765	0.00247545	0.160245	0.314547	-0.20893	-1.71737	-2.2469	-2.39094	-1.9332	1.00172	1.11748	1.24362	-1.15583	-3.28838	-4.74662	-5.245
TBXA2R	581	0.0410534	0.397779	0.438832	0.977734	0.0935515	0.906448	0.662128	131.739	135.739	135.957	135.898	12.1332	8	58	5.31834e-10	4.81572	4.84112	4.80331	4.65523	4.45425	6.06621	5.99678	7.2779	6.21077	-0.667166	-0.64077	-0.680058	-0.833892	-1.04269	0.631934	0.559805	1.89072	0.782114	0.0254084	-0.0124098	-0.160488	-0.36147	1.25049	1.18106	2.46218	1.39505	1.01777	-1.00864	-1.11767	-1.28473	2.37923	2.26744	5.51049
IL2RA	582	0.0409331	0.649582	0.690515	3.85652	0.059279	0.940721	0.858023	158.817	162.817	163.035	162.976	40.4096	8	58	5.91201e-21	4.8526	4.81137	4.80331	4.65523	4.45425	6.95126	9.26641	9.45596	10.6632	-0.723693	-0.740228	-0.743461	-0.802849	-0.883454	0.117991	1.0465	1.12252	1.60668	-0.0412277	-0.049289	-0.197367	-0.398349	2.09867	4.41382	4.60336	5.81058	-1.02899	-1.03475	-1.1466	-1.318	4.28313	21.3153	24.3081
IL13RA1	583	0.07623	0.368395	0.444625	0.761491	0.171448	0.828552	0.606979	129.925	133.925	134.143	134.084	8.26045	8	58	2.16213e-07	7.50431	7.86867	8.24465	8.32619	9.41906	8.77013	8.54116	8.03878	7.54317	-1.22423	-0.626584	-0.00988693	0.123853	1.91643	0.852026	0.476455	-0.347564	-1.1605	0.364363	0.740341	0.821877	1.91475	1.26582	1.03685	0.534472	0.0388559	1.28731	1.67057	1.7677	3.77047	2.40463	2.05174	1.44841
PTPN2	584	0.0171459	0.294185	0.311331	1.43912	0.0550729	0.944927	0.82732	112.694	116.694	116.912	116.853	32.8442	8	58	8.04783e-19	8.08831	8.18667	8.0604	8.78142	10.0401	10.7627	10.6536	9.604	9.75655	-1.14621	-1.05512	-1.17206	-0.504312	0.66135	1.33059	1.22951	0.257481	0.398766	0.0983642	-0.0279129	0.693114	1.95178	2.67442	2.56527	1.51569	1.66824	1.07056	-1.01954	1.61677	3.86851	6.38381	5.91867	2.85935
LTB	585	0.0122189	0.329526	0.341745	0.472668	0.0357545	0.964246	0.404459	118.404	122.404	122.622	122.563	4.27654	8	58	0.000435911	6.9888	6.85336	7.11307	6.78187	7.28314	6.59317	6.55439	5.75534	5.017	0.608828	0.421378	0.780828	0.322435	1.01621	0.0612628	0.00759488	-1.09833	-2.12021	-0.135437	0.124274	-0.206926	0.294343	-0.395628	-0.434405	-1.23346	-1.97179	-1.09843	1.08996	-1.15423	1.22633	-1.31552	-1.35135	-2.3513
CCR5	586	0.118843	0.225762	0.344605	0.726386	0.344867	0.655133	0.753555	106.256	110.256	110.475	110.415	13.7106	8	58	6.23226e-11	5.98393	6.31752	5.82075	6.3357	6.75798	7.03942	7.77631	7.52001	7.15725	-1.11901	-0.628802	-1.3588	-0.602086	0.0184406	0.432015	1.51485	1.13823	0.605162	0.333595	-0.16318	0.351776	0.774051	1.05549	1.79238	1.53608	1.17332	1.26015	-1.11975	1.27613	1.71007	2.07843	3.46385	2.90006
EOMES	587	0.130797	0.141757	0.272554	0.613165	0.479894	0.520106	0.818452	82.5957	86.5957	86.8139	86.7546	23.6956	8	58	1.21187e-15	6.50722	6.41801	6.1004	5.57593	5.44606	5.439	4.7317	4.59553	4.77179	1.38225	1.25865	0.818633	0.0920124	-0.0879094	-0.0976972	-1.07761	-1.26626	-1.02207	-0.0892111	-0.406816	-0.931289	-1.06116	-1.06822	-1.77552	-1.91169	-1.73543	-1.06379	-1.32576	-1.90698	-2.0866	-2.09685	-3.42362	-3.76249
NFKBIA	588	0.0332548	0.500392	0.533647	2.69081	0.0623161	0.937684	0.843487	143.811	147.811	148.029	147.97	36.9436	8	58	5.06915e-20	8.63649	8.84128	9.06507	8.9224	10.5445	12.3335	12.4827	11.3323	11.5285	-1.12869	-0.99833	-0.855883	-0.946697	0.085847	1.22462	1.31962	0.587317	0.712203	0.204797	0.428579	0.285911	1.90802	3.69702	3.84626	2.69583	2.89202	1.15252	1.34591	1.21918	3.75295	12.9692	14.3826	6.47925
TGFB1	589	0.0160122	0.0608421	0.0768543	0.115277	0.208345	0.791655	0.574263	26.5742	30.5742	30.7924	30.7331	6.53473	8	58	4.7766e-06	9.53822	9.48911	9.48864	9.65246	9.34019	9.09391	9.33617	8.89217	8.68095	0.798112	0.646837	0.64541	1.14996	0.188191	-0.570363	0.175799	-1.1917	-1.84224	-0.0491162	-0.0495796	0.114239	-0.19803	-0.444319	-0.202054	-0.646056	-0.857275	-1.03463	-1.03496	1.0824	-1.14713	-1.36067	-1.15033	-1.56488
TP53	590	0.0941847	0.391451	0.485636	0.597412	0.193941	0.806059	0.470082	134.125	138.125	138.343	138.284	3.37612	8	58	0.00303551	6.20411	6.11413	5.95239	5.89739	5.66101	6.53415	5.91684	7.40843	6.59852	-0.0945844	-0.264809	-0.570775	-0.674829	-1.122	0.529765	-0.638033	2.18372	0.651546	-0.0899816	-0.251717	-0.30672	-0.543097	0.330035	-0.28727	1.20432	0.394409	-1.06436	-1.19062	-1.23689	-1.4571	1.25704	-1.22033	2.30429
CDC42	591	0.0347156	0.100577	0.135292	0.144813	0.256597	0.743403	0.443875	57.0725	61.0725	61.2907	61.2314	2.21222	8	58	0.0393911	11.5474	11.6584	11.4587	11.7168	11.8315	11.7968	11.5559	11.2094	11.2213	-0.0339623	0.454957	-0.424858	0.712521	1.21805	1.06482	0.00339112	-1.52378	-1.47114	0.110937	-0.0886949	0.169378	0.284083	0.249316	0.00847555	-0.338042	-0.326098	1.07993	-1.06341	1.12457	1.21764	1.18864	1.00589	-1.26404
PLAUR	592	0.041938	0.470082	0.51202	2.82519	0.081907	0.918093	0.861186	140.979	144.979	145.198	145.138	41.2838	8	58	3.52241e-21	4.88799	5.06969	5.51712	5.14547	6.22518	8.36155	8.70824	8.63438	9.14689	-1.08519	-0.984949	-0.73813	-0.943147	-0.347531	0.830993	1.02224	0.981494	1.26422	0.181708	0.629132	0.257485	1.33719	3.47357	3.82025	3.74639	4.2589	1.13423	1.54663	1.19539	2.52659	11.1083	14.1257	13.4207
CD82	593	0.14712	0.259721	0.406842	1.4612	0.361616	0.638384	0.859268	114.802	118.802	119.02	118.961	36.9411	8	58	5.07738e-20	7.29194	7.38586	7.65543	7.27862	7.90341	9.44456	10.4096	9.43283	10.101	-0.974775	-0.9017	-0.691963	-0.985139	-0.499028	0.700049	1.45085	0.690918	1.21079	0.0939223	0.363494	-0.0133214	0.61147	2.15262	3.11762	2.14089	2.80907	1.06727	1.28654	-1.00928	1.52781	4.44636	8.67955	4.41034
ITGA5	594	0.0300729	0.310253	0.340326	0.365697	0.088365	0.911635	0.294035	117.129	121.129	121.347	121.288	1.73953	8	58	0.108513	9.03936	9.11789	9.50315	9.22441	9.4676	9.12328	9.44745	8.48377	8.83033	-0.296115	-0.0590933	1.10367	0.262384	0.996395	-0.0428171	0.935563	-1.97298	-0.927003	0.0785318	0.463786	0.185046	0.428244	0.0839246	0.408089	-0.555591	-0.20903	1.05594	1.37916	1.13685	1.34559	1.0599	1.32693	-1.46977
CD97	595	0.113126	0.37511	0.488236	1.18088	0.231704	0.768296	0.744739	132.735	136.735	136.953	136.894	17.2721	8	58	8.12471e-13	8.01598	7.7463	8.37749	8.29697	9.68827	9.89603	10.0537	9.86542	9.55561	-1.12384	-1.41551	-0.732858	-0.819941	0.684813	0.909514	1.08009	0.876402	0.541336	-0.269681	0.361508	0.28099	1.67229	1.88005	2.03777	1.84944	1.53963	-1.20554	1.28477	1.21503	3.18721	3.68089	4.10611	3.6036
FCGR2B	596	0.0918237	0.239361	0.331184	1.05171	0.277259	0.722741	0.818244	107.913	111.913	112.131	112.072	27.3363	8	58	5.27397e-17	10.6283	10.8394	11.4178	11.8192	12.7994	12.733	12.8908	12.1064	12.2752	-1.57008	-1.3185	-0.629016	-0.150571	1.01781	0.938717	1.1268	0.19182	0.393016	0.211053	0.78949	1.19087	2.17107	2.10472	2.26251	1.47812	1.64691	1.15753	1.72846	2.28291	4.50359	4.30114	4.79825	2.78585
PMCH	597	0	0.087152	0.087152	0.113001	0	1	0.322234	39.4189	41.4189	41.4903	41.4983	3.44691	8	58	0.00260014	4.81572	4.80253	4.81057	4.65523	4.64712	4.4456	4.25284	4.39357	4.48415	1.10185	1.03757	1.07675	0.319447	0.279923	-0.70253	-1.64225	-0.956164	-0.514591	-0.0131838	-0.00514844	-0.160488	-0.168595	-0.370119	-0.562877	-0.422145	-0.331568	-1.00918	-1.00358	-1.11767	-1.12396	-1.29246	-1.47721	-1.33992
MBL2	598	0.00221477	0.342058	0.344272	0.438598	0.0064332	0.993567	0.318784	119.083	123.083	123.301	123.242	3.28635	8	58	0.00369567	4.86448	4.80253	4.82983	4.71232	4.64712	5.43621	5.02611	6.11331	5.28897	-0.461037	-0.593496	-0.535128	-0.7864	-0.925801	0.761452	-0.115447	2.20923	0.446626	-0.0619484	-0.0346508	-0.152165	-0.21736	0.571731	0.161625	1.24882	0.424494	-1.04387	-1.02431	-1.11124	-1.1626	1.48631	1.11855	2.37648
CCR6	599	0.0431236	0.336245	0.379369	0.582332	0.113672	0.886328	0.523779	122.725	126.725	126.944	126.884	6.20463	8	58	8.93439e-06	5.40448	5.32429	5.28742	4.93382	4.52061	5.83711	5.70376	6.70734	5.59599	-0.122726	-0.254047	-0.314427	-0.893477	-1.57014	0.585736	0.367372	2.01082	0.19089	-0.0801917	-0.117063	-0.470662	-0.883869	0.432625	0.29928	1.30286	0.191511	-1.05716	-1.08452	-1.38574	-1.84532	1.34969	1.23053	2.46717
FOS	600	0.144346	0.55258	0.696926	1.61468	0.207118	0.792882	0.723896	154.505	158.505	158.723	158.664	14.7122	8	58	1.72284e-11	11.0123	11.0068	12.3843	12.4827	11.9728	10.608	9.75664	9.24913	8.57554	0.165839	0.161817	1.15855	1.2297	0.860763	-0.126718	-0.74272	-1.10993	-1.5973	-0.00555848	1.37201	1.47034	0.96044	-0.404337	-1.2557	-1.76321	-2.4368	-1.00386	2.5883	2.77087	1.9459	-1.32348	-2.38783	-3.39453
CSF2RB	601	0.114191	0.323785	0.437976	1.5341	0.260724	0.739276	0.831093	124.995	128.995	129.213	129.154	30.5884	8	58	4.15368e-18	6.2286	6.33722	6.74817	7.22048	8.57124	8.75785	8.76158	8.84566	8.1525	-1.37108	-1.27228	-0.898473	-0.468856	0.759818	0.929559	0.932957	1.00944	0.378923	0.108619	0.51957	0.991876	2.34264	2.52924	2.53298	2.61706	1.92389	1.0782	1.43353	1.98877	5.07229	5.77269	5.78766	6.13497
CDKN1A	602	0.061853	0.211317	0.27317	0.598788	0.226427	0.773573	0.716177	99.3036	103.304	103.522	103.462	14.3446	8	58	2.74415e-11	6.82047	6.71018	6.78281	7.62779	7.46755	8.08436	8.22181	8.40248	8.02193	-1.13133	-1.29756	-1.18809	0.0855311	-0.155998	0.773722	0.980894	1.25321	0.679621	-0.110288	-0.0376605	0.807317	0.647076	1.26389	1.40134	1.58201	1.20146	-1.07944	-1.02645	1.74995	1.56599	2.40143	2.64147	2.99386
KNG1	603	0.00243085	0.080463	0.0828939	0.112987	0.0293249	0.970675	0.389065	36.3253	40.3253	40.5435	40.4842	4.13037	8	58	0.000594506	4.81572	4.80253	4.80331	4.65523	4.45425	4.4456	4.25164	4.38859	4.46174	1.20084	1.13787	1.14157	0.434337	-0.525567	-0.566876	-1.49324	-0.839165	-0.489769	-0.0131838	-0.0124098	-0.160488	-0.36147	-0.370119	-0.564078	-0.42713	-0.353975	-1.00918	-1.00864	-1.11767	-1.28473	-1.29246	-1.47844	-1.34456
CSF2	604	0	0.244136	0.244136	0.240373	0	1	0.107454	99.1631	101.163	101.234	101.243	0.872834	8	58	0.544589	4.81572	4.80253	4.80331	4.65523	4.64712	4.99187	4.56709	5.21045	4.56224	0.150096	0.0878027	0.09146	-0.608212	-0.646519	0.982404	-1.02465	2.0152	-1.04759	-0.0131838	-0.0124098	-0.160488	-0.168595	0.176149	-0.248622	0.39473	-0.253477	-1.00918	-1.00864	-1.11767	-1.12396	1.12986	-1.18807	1.3147
CCRL1	605	0.00241672	0.0871515	0.0895683	0.104123	0.0269819	0.973018	0.280779	40.8424	44.8424	45.0606	45.0013	2.42208	8	58	0.0248633	4.81572	4.80253	4.80331	4.65523	4.45425	4.50732	4.51617	4.38737	4.47043	1.26201	1.18439	1.18895	0.31711	-0.866207	-0.553744	-0.501627	-1.25994	-0.77094	-0.0131838	-0.0124098	-0.160488	-0.36147	-0.308399	-0.299547	-0.428345	-0.345289	-1.00918	-1.00864	-1.11767	-1.28473	-1.23833	-1.23076	-1.34569
IL28A	606	0.0634502	0.548921	0.612371	0.989265	0.103614	0.896386	0.540839	150.791	154.791	155.009	154.95	6.79126	8	58	2.95911e-06	4.81572	4.80253	4.80331	4.65523	4.45425	5.71891	5.42776	7.26176	5.90904	-0.565733	-0.580626	-0.579752	-0.747036	-0.974084	0.454597	0.125688	2.19756	0.669387	-0.0131838	-0.0124098	-0.160488	-0.36147	0.903188	0.612041	2.44605	1.09332	-1.00918	-1.00864	-1.11767	-1.28473	1.87019	1.52842	5.44921
PAX5	607	0.00154017	0.0923976	0.0939378	0.127578	0.0163956	0.983604	0.372714	43.6992	47.6992	47.9174	47.8581	4.03269	8	58	0.000732312	4.87887	4.91912	4.82892	4.73275	4.45425	4.4456	4.39775	4.39139	4.47765	1.19588	1.37765	0.970358	0.536093	-0.721529	-0.760585	-0.976659	-1.00535	-0.615853	0.0402538	-0.0499428	-0.146113	-0.424619	-0.433268	-0.481119	-0.487473	-0.401217	1.02829	-1.03522	-1.10658	-1.34222	-1.35029	-1.39583	-1.40199
CD79A	608	0.037839	0.308929	0.346768	0.575546	0.109119	0.890881	0.556655	117.649	121.649	121.867	121.808	7.1981	8	58	1.40386e-06	7.1369	6.85906	6.68809	6.51779	5.42292	6.39814	6.50511	7.0489	6.07332	1.17692	0.649693	0.325259	0.00207727	-2.07558	-0.224961	-0.0219853	1.00993	-0.84136	-0.277836	-0.448804	-0.619111	-1.71398	-0.738754	-0.631791	-0.0880015	-1.06358	-1.21237	-1.36491	-1.53593	-3.28064	-1.66873	-1.54949	-1.0629
SYK	609	0.0148579	0.186208	0.201066	0.336358	0.0738956	0.926104	0.536569	86.9516	90.9516	91.1697	91.1104	7.0726	8	58	1.76381e-06	9.32859	9.7458	9.9049	9.90829	10.4901	10.3347	10.1156	9.52406	9.59824	-1.45442	-0.360653	0.0564594	0.0653437	1.59077	1.18315	0.608828	-0.941978	-0.747497	0.417207	0.57631	0.579699	1.16156	1.00608	0.787005	0.195467	0.269649	1.33534	1.49103	1.49454	2.23698	2.00844	1.72549	1.14509
CD2	610	0.0537904	0.174555	0.228345	0.835341	0.235566	0.764434	0.832179	88.4736	92.4736	92.6917	92.6324	30.3085	8	58	5.12556e-18	7.24612	7.096	6.70846	7.04594	6.33943	5.96797	4.88519	5.11646	4.55186	1.1067	0.960928	0.584619	0.912314	0.226293	-0.134395	-1.18579	-0.961221	-1.50945	-0.150121	-0.537667	-0.200187	-0.906691	-1.27815	-2.36093	-2.12966	-2.69426	-1.10966	-1.45162	-1.14885	-1.87474	-2.42528	-5.13702	-4.37615
LILRA3	611	0.232704	0.3532	0.585904	1.87386	0.397171	0.602829	0.851185	133.512	137.512	137.73	137.671	33.9943	8	58	3.60703e-19	6.37667	6.80832	7.63833	7.3163	8.74343	9.38238	9.69486	8.94904	8.98361	-1.53206	-1.1714	-0.477913	-0.746977	0.44542	0.979273	1.24036	0.617209	0.646091	0.431656	1.26166	0.939633	2.36676	3.00571	3.31819	2.57237	2.60694	1.34878	2.39772	1.91804	5.15783	8.03173	9.97414	5.94786
RIPK2	612	0.0820366	0.259306	0.341342	1.05685	0.240335	0.759665	0.803089	111.56	115.56	115.778	115.719	24.9875	8	58	3.83314e-16	6.5742	6.81486	6.86609	7.64506	8.64332	8.78651	8.43579	8.2571	8.15052	-1.43745	-1.15456	-1.09433	-0.178668	0.994788	1.1631	0.750828	0.540787	0.415502	0.240659	0.29189	1.07085	2.06912	2.21231	1.86158	1.6829	1.57632	1.18153	1.22424	2.10068	4.19631	4.63416	3.63406	3.21073
GZMA	613	0.848545	0.493596	1.34214	1.2838	0.632232	0.367768	0.700166	158.917	162.917	163.136	163.076	3.66841	8	58	0.00160522	6.15838	6.49748	6.20801	6.02023	5.63463	5.25502	4.94063	5.50564	5.87596	0.742848	1.42379	0.842525	0.465441	-0.308859	-1.07114	-1.70247	-0.567879	0.175739	0.339106	0.0496385	-0.138146	-0.523742	-0.903352	-1.21775	-0.652732	-0.282416	1.26497	1.03501	-1.10049	-1.43768	-1.87041	-2.32583	-1.57214
PRKCD	614	0.0216038	0.156749	0.178353	0.35232	0.12113	0.87887	0.633912	78.7214	82.7214	82.9395	82.8802	10.4139	8	58	6.63549e-09	7.85316	8.08808	8.51565	8.56992	8.98077	8.85609	9.06546	8.1767	8.19311	-1.45929	-0.910356	0.0887779	0.215583	1.17564	0.884286	1.37353	-0.70326	-0.664917	0.234914	0.662491	0.716757	1.12761	1.00293	1.2123	0.32354	0.339949	1.17684	1.58281	1.64348	2.18496	2.00406	2.31707	1.2514
CR1	615	0.0268506	0.160794	0.187645	0.295928	0.143093	0.856907	0.555626	80.9398	84.9398	85.158	85.0987	6.78849	8	58	2.97434e-06	6.68557	6.70617	6.51822	6.38831	5.60672	6.34428	6.86697	6.22889	5.93227	0.804689	0.856267	0.385715	0.0604656	-1.89629	-0.0497729	1.25883	-0.338646	-1.08125	0.0206016	-0.16735	-0.297264	-1.07885	-0.341296	0.181397	-0.45668	-0.753299	1.01438	-1.12299	-1.22881	-2.11235	-1.26689	1.13398	-1.37238
IL12A	616	0.00243085	0.080463	0.0828939	0.112987	0.0293249	0.970675	0.389065	36.3253	40.3253	40.5435	40.4842	4.13037	8	58	0.000594506	4.81572	4.80253	4.80331	4.65523	4.45425	4.4456	4.25164	4.38859	4.46174	1.20084	1.13787	1.14157	0.434337	-0.525567	-0.566876	-1.49324	-0.839165	-0.489769	-0.0131838	-0.0124098	-0.160488	-0.36147	-0.370119	-0.564078	-0.42713	-0.353975	-1.00918	-1.00864	-1.11767	-1.28473	-1.29246	-1.47844	-1.34456
MAP2K1	617	0.0543931	0.115146	0.169539	0.186347	0.32083	0.67917	0.508911	66.5988	70.5988	70.817	70.7577	2.19869	8	58	0.0405712	7.51369	7.51889	7.55748	7.64894	7.56474	7.87739	8.03036	7.6289	8.12717	-0.880101	-0.857773	-0.69202	-0.299238	-0.660866	0.681878	1.33883	-0.3853	1.75459	0.00519896	0.0437942	0.135252	0.0510481	0.363701	0.516671	0.115213	0.613478	1.00361	1.03082	1.09828	1.03602	1.28672	1.43065	1.08313
TAL1	618	0.169244	0.470458	0.639702	0.814892	0.264567	0.735433	0.538208	146.768	150.768	150.987	150.927	5.04186	8	58	8.88997e-05	6.12018	6.08533	5.98691	6.58526	6.47369	7.16415	7.23589	7.81688	6.73602	-0.923769	-0.980338	-1.14006	-0.168963	-0.350035	0.770554	0.88699	1.8299	0.075719	-0.0348557	-0.133269	0.465079	0.35351	1.04397	1.11571	1.69669	0.615842	-1.02445	-1.09678	1.38039	1.27767	2.06189	2.16702	3.24157
UBE2L3	619	0.0108089	0.142086	0.152895	0.243917	0.0706949	0.929305	0.511669	71.1371	75.1371	75.3553	75.296	6.37035	8	58	6.51507e-06	8.79751	8.81499	8.63339	8.96694	9.45208	9.53418	9.46506	8.92826	9.35448	-0.893894	-0.843129	-1.37068	-0.401695	1.00769	1.2462	1.04541	-0.514045	0.72415	0.0174743	-0.164121	0.169426	0.654568	0.736666	0.66755	0.130753	0.556966	1.01219	-1.12048	1.12461	1.57414	1.66632	1.58837	1.09486
KLRG2	620	0.00243085	0.080463	0.0828939	0.112987	0.0293249	0.970675	0.389065	36.3253	40.3253	40.5435	40.4842	4.13037	8	58	0.000594506	4.81572	4.80253	4.80331	4.65523	4.45425	4.4456	4.25164	4.38859	4.46174	1.20084	1.13787	1.14157	0.434337	-0.525567	-0.566876	-1.49324	-0.839165	-0.489769	-0.0131838	-0.0124098	-0.160488	-0.36147	-0.370119	-0.564078	-0.42713	-0.353975	-1.00918	-1.00864	-1.11767	-1.28473	-1.29246	-1.47844	-1.34456
IL17F	621	0.0123448	0.321394	0.333739	0.427853	0.0369893	0.963011	0.358818	117.013	121.013	121.231	121.171	3.46448	8	58	0.00250219	4.81572	4.80253	4.80331	4.65523	4.45425	5.44716	4.63475	5.87866	4.74686	-0.220576	-0.249752	-0.248039	-0.57575	-1.02054	1.17686	-0.621061	2.13181	-0.372958	-0.0131838	-0.0124098	-0.160488	-0.36147	0.631442	-0.180962	1.06294	-0.0688549	-1.00918	-1.00864	-1.11767	-1.28473	1.54911	-1.13364	2.08919
CEBPB	622	0.0768318	0.382966	0.459798	2.44955	0.167099	0.832901	0.872868	132.04	136.04	136.258	136.199	44.8623	8	58	4.63318e-22	9.10963	8.96775	9.64783	9.84108	12.0522	12.1491	12.5929	12.158	11.9332	-1.21901	-1.31355	-0.860393	-0.731626	0.741697	0.806287	1.10201	0.81218	0.662405	-0.141879	0.538203	0.731453	2.94257	3.03951	3.48332	3.04835	2.82357	-1.10334	1.45216	1.66031	7.6878	8.2221	11.1836	8.27265
IL13	623	0.0251343	0.270166	0.2953	0.352847	0.0851146	0.914885	0.362047	108.98	112.98	113.198	113.138	2.8453	8	58	0.00976797	4.81572	4.80253	4.80331	4.65523	4.45425	5.19905	4.88444	5.79911	5.13244	-0.343515	-0.37735	-0.375364	-0.755404	-1.27122	0.640302	-0.167132	2.18034	0.469348	-0.0131838	-0.0124098	-0.160488	-0.36147	0.383333	0.0687253	0.983389	0.316722	-1.00918	-1.00864	-1.11767	-1.28473	1.30435	1.04879	1.9771
PDCD1	624	0.00779494	0.258998	0.266793	0.264265	0.0292171	0.970783	0.159151	104.124	108.124	108.342	108.282	0.95997	8	58	0.475917	4.81572	4.82213	4.80331	4.65523	4.45425	5.09162	4.59216	4.7909	4.67884	0.395123	0.43089	0.325877	-0.500398	-1.62187	1.93467	-0.852305	0.256644	-0.368631	0.00640988	-0.0124098	-0.160488	-0.36147	0.275906	-0.223554	-0.0248171	-0.136874	1.00445	-1.00864	-1.11767	-1.28473	1.21075	-1.16761	-1.01735
CCL11	625	0.00147155	0.0823932	0.0838648	0.100059	0.0175467	0.982453	0.287442	37.112	41.112	41.3302	41.2709	2.64483	8	58	0.0152125	4.81572	4.80253	4.80331	4.65523	4.45425	4.59766	4.3856	4.44919	4.47143	1.22742	1.15103	1.15552	0.29753	-0.866987	-0.0360403	-1.26473	-0.896314	-0.767424	-0.0131838	-0.0124098	-0.160488	-0.36147	-0.218058	-0.430116	-0.366531	-0.344286	-1.00918	-1.00864	-1.11767	-1.28473	-1.16317	-1.34734	-1.28925
STAT5B	626	0.0221269	0.260032	0.282159	0.426505	0.07842	0.92158	0.490619	106.5	110.5	110.719	110.659	5.57107	8	58	3.06906e-05	9.20839	9.38782	9.85472	9.5652	10.3761	9.64705	9.64466	8.81151	8.4893	-0.418915	-0.0981869	0.73637	0.218869	1.66839	0.36516	0.360897	-1.12833	-1.70426	0.179432	0.646328	0.35681	1.16775	0.438653	0.436268	-0.396883	-0.719088	1.13244	1.56518	1.28059	2.24661	1.35534	1.3531	-1.31666
CLEC5A	627	0.0143806	0.859186	0.873567	2.07971	0.016462	0.983538	0.642198	173.036	177.036	177.254	177.195	12.6411	8	58	2.62205e-10	4.81572	4.80253	4.80331	4.67909	5.51829	7.50811	7.72679	6.57681	6.02938	-0.842425	-0.853387	-0.852744	-0.956028	-0.258258	1.39622	1.57805	0.62187	0.166699	-0.0131838	-0.0124098	-0.136628	0.70257	2.69239	2.91108	1.76109	1.21366	-1.00918	-1.00864	-1.09933	1.6274	6.46385	7.52179	3.38954
SYT17	628	0.00243085	0.080463	0.0828939	0.112987	0.0293249	0.970675	0.389065	36.3253	40.3253	40.5435	40.4842	4.13037	8	58	0.000594506	4.81572	4.80253	4.80331	4.65523	4.45425	4.4456	4.25164	4.38859	4.46174	1.20084	1.13787	1.14157	0.434337	-0.525567	-0.566876	-1.49324	-0.839165	-0.489769	-0.0131838	-0.0124098	-0.160488	-0.36147	-0.370119	-0.564078	-0.42713	-0.353975	-1.00918	-1.00864	-1.11767	-1.28473	-1.29246	-1.47844	-1.34456
VTN	629	0.00243085	0.080463	0.0828939	0.112987	0.0293249	0.970675	0.389065	36.3253	40.3253	40.5435	40.4842	4.13037	8	58	0.000594506	4.81572	4.80253	4.80331	4.65523	4.45425	4.4456	4.25164	4.38859	4.46174	1.20084	1.13787	1.14157	0.434337	-0.525567	-0.566876	-1.49324	-0.839165	-0.489769	-0.0131838	-0.0124098	-0.160488	-0.36147	-0.370119	-0.564078	-0.42713	-0.353975	-1.00918	-1.00864	-1.11767	-1.28473	-1.29246	-1.47844	-1.34456
LILRB3	630	0.172055	0.349406	0.521461	2.10447	0.329947	0.670053	0.868165	131.212	135.212	135.43	135.371	41.0126	8	58	4.1322e-21	5.32794	5.31671	6.03717	6.19156	6.76814	8.23518	8.36495	9.43563	8.38723	-1.18105	-1.18846	-0.713187	-0.611342	-0.230979	0.736801	0.822404	1.52871	0.837106	-0.0112336	0.709232	0.863616	1.4402	2.90724	3.03701	4.10769	3.05929	-1.00782	1.63493	1.81959	2.71359	7.50184	8.20787	17.2401
TLR3	631	0.0534589	0.605544	0.659002	2.51211	0.081121	0.918879	0.798835	155.635	159.635	159.854	159.794	26.2386	8	58	1.31055e-16	4.81572	4.80253	4.80331	5.11459	7.25411	8.07031	7.78852	7.53089	6.99844	-1.07615	-1.08538	-1.08484	-0.866953	0.630634	1.20194	1.0047	0.824369	0.451674	-0.0131838	-0.0124098	0.298869	2.4384	3.2546	2.9728	2.71517	2.18273	-1.00918	-1.00864	1.23018	5.42039	9.54402	7.85058	6.56673
THY1	632	0.0409203	0.342047	0.382967	0.992453	0.106851	0.893149	0.715117	123.474	127.474	127.692	127.633	15.5294	8	58	6.27755e-12	4.90666	4.89717	4.83751	4.66294	4.45425	6.02483	6.25552	7.48083	6.16165	-0.607716	-0.617116	-0.676223	-0.84915	-1.05588	0.499933	0.728452	1.94223	0.635467	-0.00948929	-0.0691573	-0.243726	-0.452416	1.11817	1.34886	2.57416	1.25499	-1.0066	-1.0491	-1.18405	-1.36833	2.17071	2.54711	5.95525
ITGA6	633	0.255138	0.203069	0.458207	0.608372	0.556819	0.443181	0.73889	105.38	109.38	109.598	109.539	8.29065	8	58	2.05334e-07	6.81617	6.6269	6.66178	6.70204	6.01188	5.4767	6.1795	6.13729	5.67531	1.17216	0.777396	0.850154	0.934119	-0.505356	-1.6216	-0.155742	-0.243781	-1.20735	-0.18927	-0.154386	-0.114129	-0.804285	-1.33947	-0.636663	-0.678873	-1.14085	-1.14019	-1.11295	-1.08232	-1.74628	-2.53058	-1.55473	-1.60089
IKBKB	634	0	0.111684	0.111684	0.146116	0	1	0.328294	53.8042	55.8042	55.8756	55.8837	3.54341	8	58	0.00210646	7.28131	7.35094	7.40228	7.01968	6.74281	7.33194	7.28635	6.98032	6.69974	0.592711	0.851301	1.04197	-0.378893	-1.40712	0.78073	0.611429	-0.525083	-1.56704	0.0696314	0.120974	-0.261627	-0.538502	0.0506284	0.00504028	-0.300992	-0.581564	1.04945	1.08747	-1.19883	-1.45246	1.03572	1.0035	-1.23199
BCL2L1	635	0.259243	0.3881	0.647343	0.965896	0.400473	0.599527	0.682847	139.058	143.058	143.277	143.217	6.25625	8	58	8.09496e-06	9.7821	9.82901	9.70595	10.3249	10.2065	9.39503	8.98875	8.20325	8.09658	0.48194	0.539957	0.38775	1.15328	1.00692	0.00318884	-0.499324	-1.47089	-1.60282	0.0469059	-0.0761529	0.542778	0.424441	-0.387069	-0.793348	-1.57885	-1.68552	1.03305	-1.0542	1.45677	1.34205	-1.30773	-1.73309	-2.98732
TYROBP	636	0.0151762	0.228545	0.243721	0.413691	0.0622686	0.937731	0.535025	98.3566	102.357	102.575	102.516	7.01575	8	58	1.95696e-06	11.2283	11.474	11.7335	11.5098	11.405	10.7447	10.9093	9.93772	10.4726	0.313667	0.736652	1.18328	0.798263	0.61779	-0.518813	-0.235578	-1.90806	-0.987204	0.245714	0.505163	0.281504	0.176667	-0.483592	-0.31906	-1.29061	-0.755683	1.18568	1.41928	1.21546	1.13027	-1.39822	-1.24752	-2.44632
CD74	637	0.0681726	0.25794	0.326113	1.31946	0.209046	0.790954	0.84233	110.372	114.372	114.591	114.531	34.3929	8	58	2.74514e-19	12.7021	12.5721	12.5493	12.7111	11.7099	10.5076	10.2927	10.0103	9.63595	1.00314	0.902194	0.884507	1.01018	0.232798	-0.700766	-0.867623	-1.0869	-1.37752	-0.130006	-0.152785	0.00906755	-0.992138	-2.1945	-2.4094	-2.69181	-3.06612	-1.0943	-1.11171	1.0063	-1.98913	-4.57731	-5.31254	-6.46124
PTGER4	638	0.0553265	0.100372	0.155698	0.173789	0.355345	0.644655	0.542471	59.5035	63.5035	63.7217	63.6624	3.65464	8	58	0.0016539	8.77631	8.45881	8.64396	8.81815	8.56876	8.73607	9.04556	8.44673	7.58427	0.513798	-0.255614	0.193068	0.615183	0.0108236	0.416286	1.16626	-0.284894	-2.37491	-0.317503	-0.132351	0.0418374	-0.207556	-0.040239	0.269244	-0.329586	-1.19205	-1.24617	-1.09608	1.02942	-1.15473	-1.02828	1.20518	-1.25665
RPS6KA5	639	0	0.127059	0.127059	0.38873	0	1	0.712762	61.2848	63.2848	63.3563	63.3643	17.9904	8	58	3.63872e-13	7.41067	7.50205	7.53893	8.14885	7.61578	6.71012	6.63259	6.40624	5.84912	0.440196	0.565821	0.616522	1.45505	0.722185	-0.522931	-0.629511	-0.940697	-1.70663	0.0913761	0.128255	0.73818	0.205112	-0.700555	-0.778078	-1.00443	-1.56155	1.06539	1.09297	1.66807	1.15278	-1.62513	-1.71485	-2.00615
PIK3C2G	640	0	0.104956	0.104956	0.114442	0	1	0.194059	50.2002	52.2002	52.2716	52.2796	1.7457	8	58	0.107124	4.81572	4.80253	4.80331	4.65523	4.45425	4.58857	4.41782	4.65653	4.48415	1.18522	1.10067	1.10564	0.156013	-1.13288	-0.271448	-1.36645	0.164361	-0.941121	-0.0131838	-0.0124098	-0.160488	-0.36147	-0.227144	-0.397892	-0.159186	-0.331568	-1.00918	-1.00864	-1.11767	-1.28473	-1.17052	-1.31758	-1.11666
NR3C1	641	0	0.092162	0.092162	0.108216	0	1	0.251584	42.6607	44.6607	44.7321	44.7402	2.43712	8	58	0.024054	8.02954	8.20879	8.2538	8.0334	7.99327	8.02981	8.42512	7.72557	7.8132	-0.126986	0.703544	0.912072	-0.109076	-0.295028	-0.125716	1.70581	-1.53531	-1.12931	0.179257	0.224265	0.00386556	-0.0362693	0.000274104	0.39558	-0.303964	-0.216336	1.1323	1.16818	1.00268	-1.02546	1.00019	1.31547	-1.23453
BCL3	642	0.104593	0.284175	0.388769	0.944604	0.269037	0.730963	0.759501	117.649	121.649	121.867	121.808	18.0235	8	58	3.50819e-13	5.74031	5.79586	6.16629	6.4037	7.31731	7.70382	7.64756	7.30727	7.06044	-1.35734	-1.28575	-0.808405	-0.502468	0.674851	1.17293	1.10042	0.661918	0.343842	0.0555518	0.425979	0.663389	1.577	1.96352	1.90725	1.56697	1.32014	1.03926	1.34348	1.5838	2.98349	3.90011	3.75093	2.96281
LILRB4	643	0.00409283	0.339488	0.343581	0.911657	0.0119123	0.988088	0.67628	118.942	122.942	123.16	123.1	14.8377	8	58	1.47202e-11	4.81572	4.80253	4.80331	4.65523	4.68558	6.13641	6.36607	7.16708	5.91474	-0.717395	-0.73157	-0.730737	-0.889945	-0.857308	0.70256	0.949482	1.81069	0.464227	-0.0131838	-0.0124098	-0.160488	-0.130133	1.3207	1.55036	2.35136	1.09902	-1.00918	-1.00864	-1.11767	-1.09439	2.49787	2.9289	5.10305
CCL16	644	0.00243085	0.080463	0.0828939	0.112987	0.0293249	0.970675	0.389065	36.3253	40.3253	40.5435	40.4842	4.13037	8	58	0.000594506	4.81572	4.80253	4.80331	4.65523	4.45425	4.4456	4.25164	4.38859	4.46174	1.20084	1.13787	1.14157	0.434337	-0.525567	-0.566876	-1.49324	-0.839165	-0.489769	-0.0131838	-0.0124098	-0.160488	-0.36147	-0.370119	-0.564078	-0.42713	-0.353975	-1.00918	-1.00864	-1.11767	-1.28473	-1.29246	-1.47844	-1.34456
EGR2	645	0.239657	0.464701	0.704358	1.3256	0.340249	0.659751	0.721913	148.011	152.011	152.229	152.17	13.0303	8	58	1.54216e-10	6.62864	5.63023	7.26854	7.62806	6.83845	6.05229	4.83913	5.28365	4.31754	0.509795	-0.37604	1.07754	1.39652	0.695949	-0.00157107	-1.07794	-0.68354	-1.54072	-0.998413	0.639899	0.999417	0.209811	-0.576354	-1.78952	-1.34499	-2.3111	-1.9978	1.55822	1.99919	1.15654	-1.49108	-3.45699	-2.54029
EBI3	646	0.00995804	0.296722	0.30668	0.841473	0.0324705	0.96753	0.698133	112.166	116.166	116.385	116.325	15.851	8	58	4.25855e-12	4.81572	4.80253	4.80331	4.65523	4.45425	5.92129	6.36252	7.05978	5.73618	-0.646086	-0.660634	-0.65978	-0.823186	-1.04497	0.57392	1.06083	1.83026	0.369651	-0.0131838	-0.0124098	-0.160488	-0.36147	1.10557	1.5468	2.24406	0.920461	-1.00918	-1.00864	-1.11767	-1.28473	2.15184	2.92169	4.7373
CFI	647	0	0.320502	0.320502	0.325377	0	1	0.13438	114.948	116.948	117.02	117.028	1.1255	8	58	0.360167	5.15269	5.20338	4.93601	5.04357	4.87545	5.4448	5.13123	5.56201	4.48415	0.189359	0.349023	-0.493269	-0.154424	-0.684065	1.10961	0.121727	1.47885	-1.91681	0.0506808	-0.216682	-0.109125	-0.277245	0.292108	-0.0214681	0.409315	-0.668547	1.03575	-1.16206	-1.07857	-1.21188	1.22443	-1.01499	1.32805
CCRL2	648	0.37753	0.437821	0.815351	1.52585	0.463027	0.536973	0.774451	147.586	151.586	151.804	151.745	16.5622	8	58	1.83722e-12	7.35319	7.92969	7.9238	8.90084	9.55905	9.84066	9.60088	8.48183	8.37638	-1.50724	-0.843808	-0.850591	0.273792	1.03126	1.35534	1.07941	-0.208407	-0.329752	0.576498	0.570604	1.54765	2.20586	2.48747	2.24769	1.12864	1.02319	1.49123	1.48515	2.9234	4.61349	5.60792	4.74923	2.18652
LITAF	649	0.173555	0.338076	0.511631	1.19208	0.339218	0.660782	0.775006	129.534	133.534	133.752	133.693	19.384	8	58	8.12772e-14	10.1977	10.2449	10.8136	10.8909	12.1132	12.2692	12.5191	11.6653	12.0593	-1.36563	-1.31284	-0.677043	-0.590653	0.775785	0.950234	1.22957	0.275075	0.71551	0.0472219	0.615947	0.693223	1.91551	2.07155	2.32142	1.46762	1.86159	1.03327	1.53256	1.61689	3.77247	4.20339	4.99823	2.76566
GNB1	650	0.0120987	0.0685911	0.0806898	0.170897	0.149941	0.850059	0.672322	31.7488	35.7488	35.967	35.9077	12.2686	8	58	4.39746e-10	10.57	10.6346	10.8393	10.9809	11.2863	11.2482	11.518	10.9213	11.0692	-1.41315	-1.20436	-0.543403	-0.0859537	0.900362	0.777144	1.64866	-0.27842	0.199116	0.0646457	0.269296	0.410934	0.716324	0.678172	0.948017	0.351342	0.499199	1.04583	1.20522	1.32955	1.64299	1.60011	1.92922	1.27575
IFIT2	651	0.0865028	1.10224	1.18874	13.76	0.0727682	0.927232	0.932909	190.044	194.044	194.262	194.203	95.053	8	58	1.8453e-30	6.64267	8.1298	7.99336	14.0876	15.1374	14.8243	13.764	13.2906	12.0535	-1.56167	-1.10866	-1.15022	0.706233	1.02602	0.930629	0.607654	0.463441	0.0865757	1.48713	1.35069	7.44497	8.49474	8.18161	7.12136	6.64795	5.41079	2.8033	2.55034	174.245	360.722	290.343	139.233	100.284
TLR4	652	0.111055	0.470948	0.582002	1.56257	0.190815	0.809185	0.75611	144.756	148.756	148.974	148.915	18.7366	8	58	1.61533e-13	9.31042	9.8615	10.2491	10.8982	12.266	11.8149	11.3705	10.8742	11.1273	-1.66113	-1.07174	-0.657238	0.0370018	1.49991	1.01751	0.542158	0.0114212	0.282114	0.551078	0.93863	1.58774	2.95554	2.5045	2.06005	1.56382	1.81691	1.46518	1.91671	3.00577	7.7572	5.67452	4.17002	2.95635
IFI35	653	0	0.382071	0.382071	1.74712	0	1	0.807822	125.14	127.14	127.211	127.219	30.4754	8	58	4.52081e-18	4.8526	4.80253	4.94084	6.27831	7.53353	7.54358	7.28317	6.88371	6.45754	-1.24639	-1.28992	-1.16968	-0.00685924	1.08445	1.09318	0.866775	0.519484	0.148967	-0.050063	0.0882407	1.42572	2.68094	2.69098	2.43057	2.03112	1.60495	-1.03531	1.06307	2.68648	6.41272	6.45752	5.39106	4.08721
TFRC	654	0	0.327172	0.327172	0.424407	0	1	0.32255	116.143	118.143	118.214	118.222	3.45189	8	58	0.00257196	4.83267	4.80253	4.93885	4.74136	5.33533	5.90825	5.15146	5.09101	4.48415	-0.482224	-0.555233	-0.225017	-0.703421	0.735457	2.12332	0.290024	0.143604	-1.32651	-0.0301382	0.106176	-0.0913108	0.502662	1.07558	0.318786	0.258344	-0.348523	-1.02111	1.07637	-1.06534	1.41683	2.10756	1.24728	1.1961
CASP10	655	0.173034	0.520978	0.694012	0.917753	0.249324	0.750676	0.545003	152.273	156.273	156.491	156.432	4.71394	8	58	0.000174408	7.45319	7.95486	7.24179	8.37816	8.90134	8.44443	7.9914	7.46876	8.29433	-1.02522	-0.108531	-1.4115	0.66496	1.62097	0.786055	-0.0417621	-0.99676	0.511794	0.501669	-0.211397	0.92497	1.44816	0.991241	0.538209	0.0155757	0.841148	1.41585	-1.15781	1.89864	2.72859	1.98789	1.45217	1.01085
IL18RAP	656	0.103262	1.07346	1.17672	5.67242	0.087754	0.912246	0.84249	189.098	193.098	193.317	193.257	36.1903	8	58	8.26448e-20	4.81572	5.04495	5.26712	5.4232	8.82598	10.0586	9.78786	8.96176	7.97762	-1.15985	-1.055	-0.953381	-0.881986	0.674477	1.23829	1.11445	0.736583	0.286428	0.229229	0.451399	0.607484	4.01027	5.24289	4.97214	4.14605	3.1619	1.17221	1.36737	1.5236	16.1143	37.8676	31.388	17.7045
PTK2	657	0.0148445	0.159901	0.174745	0.361759	0.0849496	0.91505	0.631698	78.5532	82.5532	82.7714	82.7121	10.4042	8	58	6.7349e-09	6.98728	6.92187	6.83687	7.04407	7.24971	6.4344	6.30934	5.80999	4.64551	0.63219	0.552095	0.448007	0.701731	0.953535	-0.0448225	-0.197963	-0.809421	-2.23535	-0.0654097	-0.150412	0.0567905	0.262425	-0.552881	-0.677942	-1.17729	-2.34177	-1.04638	-1.10989	1.04015	1.19949	-1.46701	-1.59986	-2.26151
CDH5	658	0	0.0889735	0.0889735	0.106067	0	1	0.262837	40.6185	42.6185	42.69	42.698	2.585	8	58	0.0173614	4.81572	4.80253	4.80331	4.65523	4.45425	4.52372	4.40044	4.43153	4.48415	1.26273	1.18669	1.19116	0.337171	-0.821916	-0.421238	-1.13222	-0.952899	-0.649472	-0.0131838	-0.0124098	-0.160488	-0.36147	-0.291994	-0.415276	-0.384182	-0.331568	-1.00918	-1.00864	-1.11767	-1.28473	-1.22433	-1.33355	-1.30512
CTSS	659	0.271816	0.756998	1.02881	1.15122	0.264203	0.735797	0.474003	174.347	178.347	178.565	178.506	2.43409	8	58	0.0242151	11.1076	11.3602	11.3557	11.9597	11.4733	11.6632	11.5075	9.7863	10.6251	-0.149388	0.241058	0.234028	1.16761	0.41588	0.709346	0.468625	-2.19184	-0.895316	0.252594	0.248046	0.852014	0.365693	0.555548	0.399816	-1.32134	-0.482569	1.19135	1.1876	1.80502	1.2885	1.46973	1.31934	-2.49898
GTF3C1	660	0.00376732	0.279941	0.283708	0.365116	0.0132789	0.986721	0.334242	107.828	111.828	112.046	111.987	3.39175	8	58	0.00293342	5.69776	5.73074	5.9008	5.59005	5.54993	6.34821	6.45095	6.51758	6.09175	-0.763481	-0.676259	-0.226452	-1.04837	-1.15448	0.956919	1.22866	1.40488	0.278579	0.0329771	0.203041	-0.10771	-0.147828	0.650451	0.753191	0.819816	0.393983	1.02312	1.15112	-1.07752	-1.1079	1.56966	1.68552	1.76518
CD24	661	0.497501	0.335175	0.832676	1.07295	0.597473	0.402527	0.756056	135.514	139.514	139.732	139.673	9.9034	8	58	1.464e-08	6.86354	6.46484	6.54966	6.64268	5.65159	5.57471	5.46618	4.8648	4.9384	1.2868	0.759423	0.871624	0.994661	-0.316299	-0.417983	-0.561551	-1.35702	-1.25966	-0.398701	-0.313877	-0.220861	-1.21195	-1.28883	-1.39736	-1.99874	-1.92514	-1.31832	-1.24304	-1.16543	-2.31651	-2.44329	-2.6342	-3.99651
CTNNB1	662	0.00536249	0.0600831	0.0654456	0.0788426	0.0819381	0.918062	0.364237	21.6643	25.6643	25.8825	25.8232	3.02617	8	58	0.00655187	8.2699	8.44284	8.45875	8.35303	8.60771	8.47313	8.78174	8.44493	8.37412	-1.31451	-0.163164	-0.0572345	-0.761112	0.934404	0.0385038	2.09303	-0.149242	-0.620674	0.172942	0.188853	0.0831248	0.337806	0.203234	0.511841	0.175033	0.10422	1.12735	1.13986	1.05931	1.26383	1.15128	1.42587	1.12899
C8G	663	0.00243085	0.080463	0.0828939	0.112987	0.0293249	0.970675	0.389065	36.3253	40.3253	40.5435	40.4842	4.13037	8	58	0.000594506	4.81572	4.80253	4.80331	4.65523	4.45425	4.4456	4.25164	4.38859	4.46174	1.20084	1.13787	1.14157	0.434337	-0.525567	-0.566876	-1.49324	-0.839165	-0.489769	-0.0131838	-0.0124098	-0.160488	-0.36147	-0.370119	-0.564078	-0.42713	-0.353975	-1.00918	-1.00864	-1.11767	-1.28473	-1.29246	-1.47844	-1.34456
ICAM5	664	0.0360976	0.414254	0.450352	0.921708	0.0801543	0.919846	0.62477	133.578	137.578	137.796	137.737	10.2822	8	58	8.12222e-09	4.81572	4.80253	4.80331	4.65523	4.45425	5.36092	6.43581	7.10078	5.29562	-0.544605	-0.559349	-0.558484	-0.724088	-0.948858	0.0651263	1.26724	2.01092	-0.00789946	-0.0131838	-0.0124098	-0.160488	-0.36147	0.545202	1.62009	2.28507	0.479905	-1.00918	-1.00864	-1.11767	-1.28473	1.45922	3.07395	4.87386
IL23R	665	0.00199748	0.0681726	0.0701701	0.124431	0.0284662	0.971534	0.529707	26.6699	30.6699	30.8881	30.8288	7.60242	8	58	6.80104e-07	5.00258	4.81988	4.83434	4.71939	4.51222	4.4456	4.25077	4.38959	4.4749	1.60006	0.863932	0.92217	0.459001	-0.37574	-0.644198	-1.42922	-0.86987	-0.526135	-0.182692	-0.168239	-0.283188	-0.490353	-0.556979	-0.751806	-0.612986	-0.527678	-1.135	-1.12369	-1.21688	-1.40479	-1.47119	-1.6839	-1.52942
BIRC2	666	0.0386673	0.126182	0.16485	0.352689	0.234561	0.765439	0.712624	69.6241	73.6241	73.8423	73.783	13.6955	8	58	6.35732e-11	8.85133	8.9784	8.90039	9.25011	9.75093	10.1195	9.7638	9.14714	8.90502	-0.955157	-0.682372	-0.849834	-0.0991155	0.975945	1.76704	1.00357	-0.320164	-0.83991	0.127077	0.0490651	0.398788	0.899605	1.26814	0.912473	0.295812	0.0536882	1.09208	1.03459	1.3184	1.86556	2.4085	1.88227	1.22758
PDGFA	667	0.0252799	0.343991	0.369271	0.589057	0.0684591	0.931541	0.509946	122.329	126.329	126.547	126.487	6.34021	8	58	6.89871e-06	4.81572	4.80253	4.80331	4.65523	4.64026	5.84178	5.26769	6.41733	5.7546	-0.635103	-0.655709	-0.654499	-0.885947	-0.909339	0.968645	0.0713365	1.86823	0.832381	-0.0131838	-0.0124098	-0.160488	-0.175454	1.02606	0.451974	1.60161	0.938884	-1.00918	-1.00864	-1.11767	-1.12932	2.03646	1.36791	3.03483
TREM2	668	0	0.227699	0.227699	0.435082	0	1	0.540089	95.1203	97.1203	97.1918	97.1998	8.51391	8	58	1.40551e-07	4.81572	4.80253	4.80331	4.65523	4.45425	5.70551	5.72009	5.98978	5.08831	-0.544869	-0.568873	-0.567464	-0.83708	-1.20302	1.07523	1.10179	1.59283	-0.0485426	-0.0131838	-0.0124098	-0.160488	-0.36147	0.889789	0.904378	1.17406	0.272592	-1.00918	-1.00864	-1.11767	-1.28473	1.8529	1.87174	2.25646
KIR2DL4	669	0.000346805	0.221259	0.221606	0.34984	0.00156496	0.998435	0.445048	93.5452	97.5452	97.7633	97.704	5.78245	8	58	2.02363e-05	4.81572	4.80253	4.80331	4.65523	4.71349	5.5264	4.92738	6.15178	5.12941	-0.496895	-0.523894	-0.522308	-0.825548	-0.706244	0.958466	-0.268221	2.23914	0.145506	-0.0131838	-0.0124098	-0.160488	-0.102229	0.710683	0.111666	1.33606	0.313698	-1.00918	-1.00864	-1.11767	-1.07343	1.63658	1.08048	2.52461
IRF5	670	0.0876216	0.232024	0.319645	1.46795	0.274121	0.725879	0.873724	106.025	110.025	110.243	110.183	41.8528	8	58	2.52701e-21	6.0078	5.97723	6.16786	6.82682	8.24549	8.48908	8.23678	8.52662	7.66853	-1.21673	-1.24446	-1.07159	-0.474037	0.812418	1.0333	0.80452	1.06735	0.289227	-0.0305725	0.160057	0.819022	2.23769	2.48127	2.22898	2.51881	1.66073	-1.02142	1.11733	1.76421	4.7164	5.5839	4.68802	5.73111
TNFSF8	671	0	0.149841	0.149841	0.330874	0	1	0.602028	70.8502	72.8502	72.9216	72.9296	10.9674	8	58	2.87747e-09	6.91693	6.91906	7.2265	7.45029	7.99885	7.92352	7.86716	7.35718	6.41024	-0.791316	-0.787339	-0.213761	0.203743	1.22716	1.08662	0.981479	0.0300379	-1.73662	0.00213147	0.309575	0.533361	1.08192	1.00659	0.950234	0.440253	-0.506693	1.00148	1.23934	1.4473	2.11685	2.00916	1.93219	1.35684
TRAF6	672	0.00546821	0.128833	0.134301	0.137136	0.0407162	0.959284	0.199964	64.1642	68.1642	68.3824	68.3231	1.21554	8	58	0.306328	6.12639	6.18721	6.40144	6.21593	6.49922	6.22764	6.44269	6.35142	6.00476	-0.907404	-0.530915	0.795366	-0.353073	1.40067	-0.28061	1.05072	0.485661	-1.66041	0.0608147	0.275051	0.0895418	0.372827	0.101247	0.316298	0.225024	-0.121635	1.04305	1.21004	1.06403	1.29489	1.0727	1.24513	1.1688
MYL2	673	0.0187252	0.25181	0.270535	0.28782	0.0692155	0.930785	0.266069	104.267	108.267	108.485	108.426	1.62465	8	58	0.13767	4.81572	4.80253	4.80331	4.65523	4.45425	5.07396	4.80918	5.43176	4.78792	-0.119207	-0.167579	-0.164739	-0.70805	-1.44547	0.828292	-0.143177	2.14111	-0.221187	-0.0131838	-0.0124098	-0.160488	-0.36147	0.258239	-0.00653305	0.616046	-0.0277947	-1.00918	-1.00864	-1.11767	-1.28473	1.19602	-1.00454	1.53267
TNFSF12	674	0.0851122	0.2576	0.342712	0.347397	0.248349	0.751651	0.405582	111.397	115.397	115.615	115.556	1.28308	8	58	0.270216	5.67568	5.65168	5.91401	5.86852	6.0271	5.92619	5.60363	6.38464	5.60361	-0.686898	-0.781153	0.249191	0.0705381	0.693401	0.297039	-0.969873	2.09771	-0.969957	-0.0239975	0.23833	0.192845	0.351427	0.250512	-0.0720461	0.708967	-0.0720674	-1.01677	1.17963	1.14302	1.27582	1.18963	-1.05121	1.63463
CCBP2	675	0.00660527	0.316418	0.323023	0.43859	0.0204483	0.979552	0.377106	115.303	119.303	119.521	119.462	4.04948	8	58	0.000706488	4.81572	4.80253	4.80331	4.65523	4.64712	5.60309	4.90197	6.04428	4.84821	-0.412363	-0.439851	-0.438238	-0.746978	-0.763881	1.2293	-0.232533	2.14917	-0.344625	-0.0131838	-0.0124098	-0.160488	-0.168595	0.787376	0.0862503	1.22856	0.0324887	-1.00918	-1.00864	-1.11767	-1.12396	1.72593	1.06161	2.34334
IL17RA	676	0.0698716	0.219348	0.289219	0.594844	0.241587	0.758413	0.704115	101.888	105.888	106.106	106.047	13.3425	8	58	1.01414e-10	8.92506	9.27459	9.81033	9.74274	10.4652	10.3916	10.4817	9.82468	10.1904	-1.7948	-1.15179	-0.166253	-0.290594	1.03848	0.903079	1.06886	-0.13986	0.532885	0.349537	0.885275	0.817684	1.54017	1.46656	1.55668	0.899622	1.26532	1.27415	1.84712	1.76257	2.90828	2.76363	2.94176	1.86558
CD3EAP	677	0.00333205	0.0774394	0.0807715	0.112234	0.0412529	0.958747	0.412602	34.6658	38.6658	38.884	38.8247	4.41435	8	58	0.000325955	4.81572	4.82725	4.80331	4.65523	4.45425	4.4456	4.25097	4.38778	4.45561	1.1681	1.22208	1.11001	0.416814	-0.524037	-0.564526	-1.47561	-0.835173	-0.517652	0.0115295	-0.0124098	-0.160488	-0.36147	-0.370119	-0.564742	-0.427934	-0.360106	1.00802	-1.00864	-1.11767	-1.28473	-1.29246	-1.47912	-1.34531
IFNG	678	0.00522562	0.0827747	0.0880004	0.135196	0.0593819	0.940618	0.483951	39.3294	43.3294	43.5475	43.4882	5.85909	8	58	1.74208e-05	4.91427	4.91201	4.90555	4.85843	4.50342	4.4456	4.24108	4.51537	4.45712	1.06667	1.05788	1.03283	0.850134	-0.526541	-0.750786	-1.54387	-0.480206	-0.706102	-0.00226724	-0.00872682	-0.055839	-0.410848	-0.468675	-0.673191	-0.398899	-0.457152	-1.00157	-1.00607	-1.03946	-1.32947	-1.38384	-1.5946	-1.3185
IL6R	679	0.0483042	0.221552	0.269856	0.372323	0.179	0.821	0.517348	100.663	104.663	104.881	104.822	4.9205	8	58	0.000113933	8.5715	8.70981	9.28269	8.99996	9.49008	9.10115	9.07947	8.42748	7.69828	-0.456626	-0.200231	0.861749	0.337636	1.2462	0.525211	0.485017	-0.723597	-2.07536	0.138312	0.711195	0.428463	0.918585	0.52965	0.507967	-0.144017	-0.873221	1.10062	1.63716	1.3458	1.89026	1.44358	1.42205	-1.10498
TICAM1	680	0.0144184	0.433472	0.447891	0.708138	0.0321918	0.967808	0.47588	134.137	138.137	138.355	138.296	6.0255	8	58	1.261e-05	4.81572	4.85232	4.80331	4.87961	5.57181	6.07709	5.66184	6.54626	5.23369	-0.901166	-0.842951	-0.920901	-0.799565	0.301201	1.10472	0.44436	1.8508	-0.236496	0.036608	-0.0124098	0.063891	0.756096	1.26138	0.846119	1.73054	0.417971	1.0257	-1.00864	1.04528	1.68891	2.39725	1.79766	3.31853
GNAQ	681	0.0192408	0.240191	0.259431	0.642223	0.0741652	0.925835	0.686955	101.727	105.727	105.946	105.886	13.7597	8	58	5.84438e-11	9.50688	9.51223	9.6201	9.55924	9.34207	8.55455	8.43877	7.37129	7.69528	0.765862	0.772042	0.896766	0.826405	0.575313	-0.335234	-0.469095	-1.70333	-1.32873	0.00534496	0.113218	0.0523634	-0.164805	-0.952331	-1.06811	-2.13559	-1.8116	1.00371	1.08164	1.03696	-1.12101	-1.935	-2.09668	-4.39416
STAT3	682	0.0309296	0.240548	0.271477	0.646193	0.113931	0.886069	0.693008	103.309	107.309	107.527	107.468	14.1449	8	58	3.54481e-11	9.32746	9.5884	9.91473	10.4371	11.1403	10.8507	10.5528	10.0192	9.98381	-1.48172	-1.03942	-0.486277	0.399256	1.59109	1.10022	0.595229	-0.309196	-0.369179	0.260932	0.587263	1.10969	1.81281	1.52322	1.2253	0.691732	0.656345	1.19825	1.50239	2.15799	3.51326	2.87432	2.33804	1.61522
CD1D	683	0.165162	0.171201	0.336363	0.84492	0.491024	0.508976	0.84098	93.8173	97.8173	98.0355	97.9762	27.1679	8	58	6.05303e-17	5.53109	5.98504	6.23631	6.35203	7.07	7.24826	7.52479	7.80506	6.80697	-1.58707	-0.98557	-0.652617	-0.499291	0.452051	0.688253	1.05467	1.42604	0.103532	0.453945	0.705222	0.820936	1.53891	1.71717	1.9937	2.27397	1.27588	1.36978	1.6304	1.76655	2.90574	3.2879	3.98257	4.83652
IL28B	684	0.0234131	0.626367	0.64978	1.18713	0.0360323	0.963968	0.549356	155.669	159.669	159.887	159.828	8.09194	8	58	2.8884e-07	4.81572	4.80253	4.80331	4.65523	4.65876	6.16831	5.7297	7.54085	5.73932	-0.637539	-0.651114	-0.650317	-0.802795	-0.799159	0.755242	0.303605	2.16857	0.313508	-0.0131838	-0.0124098	-0.160488	-0.156957	1.35259	0.913986	2.72514	0.923603	-1.00918	-1.00864	-1.11767	-1.11493	2.5537	1.88424	6.61222
CD1A	685	0.0490097	0.106457	0.155467	0.245453	0.315242	0.684758	0.655111	61.9058	65.9058	66.124	66.0647	7.7912	8	58	4.87502e-07	5.02891	5.23673	5.35589	4.94903	4.68975	4.4456	4.44436	4.52475	4.5975	0.639298	1.24084	1.58579	0.40805	-0.342456	-1.04919	-1.05277	-0.820063	-0.609489	0.207812	0.326979	-0.0798881	-0.339162	-0.583316	-0.584553	-0.504159	-0.431413	1.15494	1.25438	-1.05694	-1.26502	-1.49829	-1.49957	-1.4183
TCF4	686	0.0593682	0.280357	0.339726	0.324057	0.174753	0.825247	0.297651	114.187	118.187	118.406	118.346	0.676883	8	58	0.709776	6.39224	6.27708	5.92831	6.35957	6.14323	6.36127	6.29829	6.39176	6.1133	0.886071	0.160159	-2.03839	0.680171	-0.683559	0.690858	0.293875	0.883075	-0.872257	-0.115157	-0.46393	-0.0326635	-0.249003	-0.0309681	-0.0939447	-0.000475332	-0.278937	-1.08309	-1.37929	-1.0229	-1.18839	-1.0217	-1.06728	-1.00033
ATM	687	0.0665789	0.102693	0.169272	0.88434	0.393325	0.606675	0.908292	61.7704	65.7704	65.9885	65.9292	60.154	8	58	2.95382e-25	8.20628	8.10455	7.78612	7.62347	6.99377	6.01776	6.10356	6.30675	5.49241	1.23241	1.13186	0.817123	0.65636	0.0339585	-0.930725	-0.845917	-0.64509	-1.44998	-0.101729	-0.42016	-0.582809	-1.21252	-2.18852	-2.10272	-1.89953	-2.71387	-1.07306	-1.33808	-1.49776	-2.31741	-4.55838	-4.29518	-3.73093
CD1C	688	0.150567	0.253196	0.403763	1.34751	0.37291	0.62709	0.851369	113.607	117.607	117.825	117.765	33.1107	8	58	6.66876e-19	7.6416	7.49087	7.1611	6.80574	6.05506	5.41551	5.18503	5.00368	3.92847	1.22063	1.10309	0.845922	0.568801	-0.0165964	-0.515333	-0.695066	-0.836482	-1.67496	-0.150728	-0.4805	-0.835864	-1.58654	-2.22609	-2.45657	-2.63792	-3.71313	-1.11013	-1.39523	-1.78493	-3.00329	-4.67865	-5.48911	-6.22432
IRF8	689	0.104605	0.190453	0.295058	0.410056	0.354525	0.645475	0.632039	96.6334	100.633	100.852	100.792	7.47166	8	58	8.58233e-07	6.92255	6.81984	6.68602	7.25216	6.784	6.34607	5.71918	6.27494	5.72961	0.791458	0.597318	0.344382	1.41448	0.529578	-0.29816	-1.48308	-0.432608	-1.46336	-0.102712	-0.23653	0.329615	-0.13855	-0.576474	-1.20337	-0.647605	-1.19294	-1.07379	-1.17816	1.25668	-1.1008	-1.4912	-2.30277	-1.56657
CCL5	690	0.210872	0.143362	0.354235	0.973833	0.59529	0.40471	0.885029	86.1971	90.1971	90.4153	90.356	39.6724	8	58	9.21607e-21	8.51347	8.53719	8.10097	8.0986	7.62698	6.86416	6.75216	6.1146	4.78251	0.993844	1.01273	0.665309	0.663416	0.287798	-0.319745	-0.408952	-0.916731	-1.97767	0.023717	-0.412501	-0.414877	-0.886494	-1.64931	-1.76132	-2.39887	-3.73096	1.01658	-1.33099	-1.33319	-1.84868	-3.13684	-3.39007	-5.27391
TNFRSF9	691	0.00243085	0.080463	0.0828939	0.112987	0.0293249	0.970675	0.389065	36.3253	40.3253	40.5435	40.4842	4.13037	8	58	0.000594506	4.81572	4.80253	4.80331	4.65523	4.45425	4.4456	4.25164	4.38859	4.46174	1.20084	1.13787	1.14157	0.434337	-0.525567	-0.566876	-1.49324	-0.839165	-0.489769	-0.0131838	-0.0124098	-0.160488	-0.36147	-0.370119	-0.564078	-0.42713	-0.353975	-1.00918	-1.00864	-1.11767	-1.28473	-1.29246	-1.47844	-1.34456
ADA	692	0.303034	0.176026	0.47906	0.425838	0.63256	0.36744	0.677639	99.1236	103.124	103.342	103.282	1.32949	8	58	0.247466	7.17108	7.13489	6.97919	7.11015	7.12389	7.24012	6.74084	6.90422	6.22566	0.673609	0.558742	0.0644443	0.480182	0.523807	0.892795	-0.692242	-0.173559	-2.32778	-0.0361824	-0.191882	-0.0609281	-0.0471864	0.0690418	-0.430233	-0.266852	-0.945414	-1.0254	-1.14225	-1.04314	-1.03325	1.04902	-1.34745	-1.20318
RORC	693	0	0.331307	0.331307	0.330627	0	1	0.119405	116.872	118.872	118.943	118.951	0.98307	8	58	0.458531	4.81572	4.81988	4.88797	4.65523	4.45425	5.14557	4.9029	5.08407	4.48415	0.0425319	0.0599302	0.344171	-0.627418	-1.46641	1.41951	0.406491	1.16278	-1.34159	0.0041678	0.0722583	-0.160488	-0.36147	0.329858	0.0871873	0.268357	-0.331568	1.00289	1.05136	-1.11767	-1.28473	1.25689	1.0623	1.20444
MAPK8	694	0.0175404	0.217984	0.235524	0.46317	0.0744739	0.925526	0.606121	96.1131	100.113	100.331	100.272	9.73497	8	58	1.90936e-08	6.3688	6.33549	6.15764	5.95394	4.98076	5.20692	5.8369	5.44709	5.88044	1.16922	1.10116	0.737861	0.321742	-1.66629	-1.20428	0.0826505	-0.71366	0.171591	-0.0333165	-0.211161	-0.41486	-1.38804	-1.16188	-0.531901	-0.921713	-0.488363	-1.02336	-1.15762	-1.33317	-2.61724	-2.23749	-1.44583	-1.89436
CCR10	695	0.0553883	0.568491	0.623879	1.14582	0.0887805	0.911219	0.587212	152.269	156.269	156.488	156.428	8.59075	8	58	1.23488e-07	4.81572	4.80253	4.80331	4.65523	4.45425	5.93467	6.04987	7.41888	5.1991	-0.557255	-0.571053	-0.570242	-0.725217	-0.93556	0.613813	0.734381	2.16715	-0.15602	-0.0131838	-0.0124098	-0.160488	-0.36147	1.11895	1.23416	2.60317	0.383379	-1.00918	-1.00864	-1.11767	-1.28473	2.17189	2.35244	6.07619
LIMK1	696	0.00904866	0.602144	0.611193	0.922379	0.0148049	0.985195	0.433854	152.331	156.331	156.55	156.49	5.27362	8	58	5.55935e-05	4.81572	4.80253	4.80331	4.65523	4.45425	6.00318	5.05981	6.67654	6.36578	-0.578585	-0.59457	-0.593631	-0.773166	-1.01684	0.861132	-0.282642	1.67754	1.30076	-0.0131838	-0.0124098	-0.160488	-0.36147	1.18746	0.24409	1.86082	1.55006	-1.00918	-1.00864	-1.11767	-1.28473	2.27751	1.18435	3.63215
B3GAT1	697	0.0748993	0.537435	0.612334	1.2519	0.122318	0.877682	0.64688	150.228	154.228	154.446	154.387	10.8718	8	58	3.31875e-09	4.81572	4.80253	4.80331	4.65523	4.45425	6.20746	5.60785	7.76101	6.17376	-0.611435	-0.62365	-0.622933	-0.760123	-0.946326	0.677969	0.122455	2.11729	0.646752	-0.0131838	-0.0124098	-0.160488	-0.36147	1.39174	0.792137	2.94529	1.35805	-1.00918	-1.00864	-1.11767	-1.28473	2.62395	1.73164	7.70233
FLT1	698	0	0.115973	0.115973	0.122065	0	1	0.165073	55.9896	57.9896	58.061	58.069	1.43339	8	58	0.202295	4.81572	4.80253	4.80331	4.65523	4.45425	4.61485	4.62934	4.97272	5.00585	0.366272	0.29232	0.296662	-0.533955	-1.66132	-0.760472	-0.679198	1.24693	1.43277	-0.0131838	-0.0124098	-0.160488	-0.36147	-0.20087	-0.186381	0.156999	0.190129	-1.00918	-1.00864	-1.11767	-1.28473	-1.14939	-1.13791	1.11497
LY96	699	0.0468116	0.434195	0.481006	1.75149	0.0973202	0.90268	0.794407	136.961	140.961	141.179	141.119	25.6126	8	58	2.23115e-16	7.13722	7.61646	7.69705	8.3287	9.79025	10.0445	10.072	8.91192	8.92729	-1.43978	-1.00522	-0.932152	-0.359387	0.965892	1.19643	1.22137	0.169456	0.183386	0.479236	0.559822	1.19148	2.65303	2.90727	2.93478	1.7747	1.79006	1.39401	1.47409	2.28387	6.28987	7.50199	7.6464	3.42167
CISH	700	0.00876976	0.368309	0.377078	1.20706	0.0232571	0.976743	0.737106	124.252	128.252	128.47	128.411	19.6434	8	58	6.19999e-14	4.81572	4.80253	4.80331	4.67253	5.6399	6.69899	6.8135	7.38945	6.62203	-0.919316	-0.931549	-0.930831	-1.05218	-0.154538	0.82822	0.934475	1.46892	0.756806	-0.0131838	-0.0124098	-0.143187	0.824182	1.88327	1.99778	2.57374	1.80631	-1.00918	-1.00864	-1.10434	1.77053	3.68911	3.99386	5.95349
PRF1	701	0.231114	0.159075	0.390189	0.49041	0.592313	0.407687	0.746643	92.1496	96.1496	96.3678	96.3085	8.92667	8	58	7.05611e-08	8.48591	8.69404	8.11121	8.18492	7.76715	7.98439	7.22633	7.70589	7.60218	1.12616	1.58364	0.302567	0.464579	-0.453692	0.0238211	-1.64243	-0.588344	-0.816302	0.208129	-0.374699	-0.300991	-0.718761	-0.501515	-1.25958	-0.780022	-0.883732	1.15519	-1.29657	-1.23199	-1.64577	-1.4157	-2.39426	-1.71716
IFI44	702	0	0.677023	0.677023	9.70886	0	1	0.93872	158.322	160.322	160.393	160.401	111.059	8	58	2.80661e-32	6.30026	7.37682	7.70797	12.0503	13.2789	13.291	13.004	12.2854	12.0289	-1.5956	-1.21501	-1.09794	0.437163	0.87148	0.875757	0.774316	0.520263	0.42958	1.07656	1.40771	5.75006	6.97861	6.9907	6.70376	5.98512	5.72861	2.10901	2.65316	53.8195	126.116	127.178	104.24	63.3433
IL1RL2	703	0.001293	0.0857462	0.0870392	0.109029	0.0148553	0.985145	0.317986	39.2859	43.2859	43.5041	43.4448	3.13371	8	58	0.00516932	4.81572	4.80253	4.80331	4.65523	4.64712	4.53594	4.25089	4.39462	4.47545	1.09303	1.02688	1.03076	0.2878	0.247124	-0.310721	-1.74089	-1.01979	-0.614194	-0.0131838	-0.0124098	-0.160488	-0.168595	-0.279778	-0.564822	-0.421101	-0.340263	-1.00918	-1.00864	-1.11767	-1.12396	-1.21401	-1.4792	-1.33895
RELA	704	0	0.373432	0.373432	1.1297	0	1	0.709509	123.814	125.814	125.885	125.893	17.7077	8	58	4.97853e-13	4.83085	4.80253	4.85933	4.73792	5.36726	6.80528	6.53719	7.34564	6.04767	-0.869888	-0.898108	-0.84151	-0.962499	-0.33532	1.09775	0.830582	1.63625	0.342742	-0.0283178	0.0284763	-0.0929311	0.536413	1.97443	1.70634	2.51479	1.21682	-1.01982	1.01993	-1.06653	1.45036	3.92972	3.26332	5.71515
PLCB1	705	0.0721832	0.171159	0.243342	0.547739	0.296633	0.703367	0.751014	88.9681	92.9681	93.1863	93.127	17.8407	8	58	4.29402e-13	5.72159	5.83046	5.63204	5.62854	4.97433	4.4456	4.25147	4.25142	4.34244	1.02566	1.18229	0.896829	0.891795	-0.0493821	-0.810036	-1.08931	-1.0894	-0.95845	0.108873	-0.0895509	-0.0930501	-0.747261	-1.27599	-1.47011	-1.47017	-1.37915	1.07839	-1.06404	-1.06662	-1.6786	-2.42165	-2.77044	-2.77055
C10orf54	706	0.0164772	0.175118	0.191595	0.315091	0.0860004	0.914	0.537102	83.8663	87.8663	88.0845	88.0252	6.9074	8	58	2.38767e-06	9.44973	9.63393	10.1647	9.92867	10.5603	10.098	10.3606	9.65152	9.74621	-1.36836	-0.869364	0.568415	-0.0709461	1.6402	0.38771	1.09928	-0.821714	-0.565222	0.184201	0.714952	0.478934	1.1106	0.648245	0.910918	0.201791	0.296474	1.13619	1.64143	1.39371	2.15935	1.56726	1.88024	1.15013
BCL10	707	0.00185597	0.127281	0.129137	0.195863	0.014372	0.985628	0.43623	62.1711	66.1711	66.3893	66.33	5.32271	8	58	5.0369e-05	7.15792	7.36233	7.50008	7.40556	7.79931	7.87361	7.74311	7.00168	6.96396	-0.783765	-0.179512	0.227673	-0.0517273	1.11219	1.3318	0.946059	-1.24561	-1.35711	0.204417	0.342166	0.247646	0.641393	0.715689	0.585193	-0.156239	-0.193961	1.15222	1.26766	1.18727	1.55984	1.64227	1.50024	-1.11438
CHIT1	708	0.0393515	0.405336	0.444688	1.21177	0.0884923	0.911508	0.721669	132.639	136.639	136.857	136.798	17.2213	8	58	8.60672e-13	4.81572	4.84891	4.90573	4.79335	5.10046	6.43354	7.20123	7.33533	6.17214	-0.865944	-0.834641	-0.781068	-0.887034	-0.597441	0.659592	1.38349	1.50994	0.413103	0.0331965	0.0900107	-0.0223652	0.284747	1.61782	2.38551	2.51961	1.35642	1.02328	1.06438	-1.01562	1.2182	3.06912	5.2253	5.73428
MUC1	709	0.000621516	0.192322	0.192943	0.197864	0.00322124	0.996779	0.148472	85.5085	89.5085	89.7267	89.6674	1.21546	8	58	0.306376	4.81572	4.80253	4.80331	4.65523	4.45425	4.9779	4.4636	4.82763	4.48442	0.613788	0.544878	0.548923	-0.225065	-1.27557	1.4615	-1.22667	0.676051	-1.11784	-0.0131838	-0.0124098	-0.160488	-0.36147	0.162184	-0.352113	0.0119121	-0.331292	-1.00918	-1.00864	-1.11767	-1.28473	1.11898	-1.27643	1.00829
BAD	710	0	0.0785124	0.0785124	0.0981227	0	1	0.296842	33.3638	35.3638	35.4352	35.4432	3.06063	8	58	0.00607238	4.81572	4.80253	4.80331	4.65523	4.45425	4.4456	4.38586	4.57605	4.48415	1.23914	1.16251	1.16701	0.306348	-0.861802	-0.912072	-1.25926	-0.153865	-0.688009	-0.0131838	-0.0124098	-0.160488	-0.36147	-0.370119	-0.429853	-0.239668	-0.331568	-1.00918	-1.00864	-1.11767	-1.28473	-1.29246	-1.3471	-1.18072
FUT5	711	0.0804266	0.636711	0.717137	1.50855	0.11215	0.88785	0.651728	159.703	163.703	163.921	163.862	11.2314	8	58	1.94699e-09	4.81572	4.80253	4.80331	4.65523	4.45425	6.36364	6.23069	7.85001	6.65395	-0.68317	-0.694293	-0.69364	-0.818568	-0.98813	0.622759	0.510598	1.87676	0.867683	-0.0131838	-0.0124098	-0.160488	-0.36147	1.54792	1.41498	3.03429	1.83823	-1.00918	-1.00864	-1.11767	-1.28473	2.92396	2.66656	8.19245
CXCL9	712	0.00224772	0.138811	0.141059	0.139889	0.0159346	0.984065	0.140231	67.282	71.282	71.5002	71.4409	0.957361	8	58	0.477904	4.81572	4.80253	4.80331	4.65523	4.45425	4.77386	4.68731	4.5437	4.47496	1.01908	0.928208	0.933544	-0.0871619	-1.47253	0.730537	0.133976	-0.855906	-1.32975	-0.0131838	-0.0124098	-0.160488	-0.36147	-0.0418609	-0.128407	-0.272013	-0.340756	-1.00918	-1.00864	-1.11767	-1.28473	-1.02944	-1.09309	-1.20749
MEF2C	713	0.0167114	0.195071	0.211783	0.435545	0.0789081	0.921092	0.62588	89.8483	93.8483	94.0664	94.0071	10.7948	8	58	3.72455e-09	5.86982	5.97004	5.78928	5.88704	5.17438	4.60088	5.08637	4.81636	4.50509	0.967881	1.13808	0.83109	0.997123	-0.213193	-1.1872	-0.362675	-0.821239	-1.34987	0.100218	-0.0805446	0.0172183	-0.695437	-1.26895	-0.783454	-1.05347	-1.36473	1.07194	-1.05742	1.01201	-1.61937	-2.40985	-1.72125	-2.07551
CD96	714	0.309304	0.168896	0.478201	1.03814	0.646809	0.353191	0.873189	97.1301	101.13	101.348	101.289	29.8977	8	58	6.99764e-18	6.87646	6.8415	6.43359	6.2033	5.67804	5.35841	4.85707	4.46677	4.90736	1.27092	1.23196	0.777461	0.52086	-0.0643949	-0.420531	-0.979144	-1.41402	-0.923109	-0.0349626	-0.442869	-0.673165	-1.19842	-1.51805	-2.01939	-2.40969	-1.9691	-1.02453	-1.3593	-1.59457	-2.29488	-2.86403	-4.05413	-5.3136
SMPD3	715	0.056532	0.490757	0.547289	0.869388	0.103295	0.896705	0.532839	144.283	148.283	148.501	148.442	6.55894	8	58	4.5642e-06	4.81572	4.80253	4.80331	4.73884	4.45425	6.03361	5.2692	6.8225	5.48282	-0.567239	-0.58458	-0.583561	-0.66835	-1.04268	1.03467	0.0292307	2.07231	0.310206	-0.0131838	-0.0124098	-0.0768725	-0.36147	1.21789	0.453482	2.00678	0.667101	-1.00918	-1.00864	-1.05473	-1.28473	2.32607	1.36934	4.01886
CXCR4	716	0.00499159	0.209614	0.214605	0.361854	0.0232594	0.976741	0.500903	91.56	95.56	95.7782	95.7189	6.64398	8	58	3.89216e-06	8.94061	9.34656	9.45945	9.07818	8.81264	8.51095	8.36861	8.29891	7.33082	0.395965	1.01987	1.19337	0.607397	0.199286	-0.264373	-0.48314	-0.590257	-2.07812	0.405952	0.518843	0.137571	-0.127972	-0.429657	-0.572001	-0.641698	-1.6098	1.32496	1.43281	1.10005	-1.09276	-1.34691	-1.48658	-1.56016
ZEB1	717	0.0214435	0.159169	0.180612	0.22633	0.118727	0.881273	0.420899	79.5264	83.5264	83.7446	83.6853	3.51156	8	58	0.00225786	5.99256	6.04379	6.19542	6.10593	6.69436	6.5433	6.30304	6.53433	5.70685	-0.771748	-0.60901	-0.12735	-0.411627	1.45759	0.977732	0.214521	0.949251	-1.67936	0.0512298	0.202856	0.113366	0.701793	0.550735	0.310477	0.541769	-0.285714	1.03615	1.15097	1.08175	1.62652	1.46483	1.24012	1.45576
MSR1	718	0.0056666	0.0720012	0.0776678	0.108374	0.0729595	0.927041	0.443604	31.8034	35.8034	36.0216	35.9623	4.5803	8	58	0.000230265	4.81572	4.80253	4.80331	4.70872	4.45425	4.50732	4.25624	4.96366	4.42747	0.760888	0.704541	0.707849	0.303576	-0.784038	-0.557213	-1.63031	1.39321	-0.898499	-0.0131838	-0.0124098	-0.106998	-0.36147	-0.308399	-0.559475	0.147946	-0.38825	-1.00918	-1.00864	-1.07699	-1.28473	-1.23833	-1.47373	1.10799
LILRA4	719	0	0.329873	0.329873	0.75596	0	1	0.61653	116.62	118.62	118.691	118.699	11.6563	8	58	1.04906e-09	4.85075	4.92473	4.82181	4.77277	4.45425	6.10358	6.61298	6.01176	5.34465	-0.632568	-0.533237	-0.671411	-0.737251	-1.16488	1.04941	1.7333	0.92613	0.0305133	0.0739875	-0.0289323	-0.0779734	-0.3965	1.25283	1.76223	1.16101	0.493902	1.05262	-1.02026	-1.05553	-1.31631	2.38309	3.39223	2.23614
CYSLTR1	720	0.0257888	0.217168	0.242957	0.460319	0.106146	0.893854	0.609942	97.1003	101.1	101.318	101.259	9.42116	8	58	3.15109e-08	7.12059	7.07448	7.12039	7.55906	8.49074	8.10427	7.71539	7.43441	6.86209	-0.707321	-0.793735	-0.70769	0.114578	1.86096	1.13654	0.407603	-0.119081	-1.19185	-0.0461012	-0.000197084	0.438475	1.37016	0.983681	0.594802	0.313821	-0.258493	-1.03247	-1.00014	1.35517	2.58499	1.9775	1.51027	1.243
PRG2	721	0.0366883	0.573994	0.610683	0.966039	0.0600775	0.939923	0.499368	151.676	155.676	155.894	155.835	6.20546	8	58	8.92014e-06	4.81572	4.80253	4.80331	4.66063	4.81058	6.19449	5.41573	6.93522	5.79678	-0.682365	-0.698911	-0.697939	-0.87699	-0.688807	1.04796	0.0706383	1.97757	0.548843	-0.0131838	-0.0124098	-0.155082	-0.0051329	1.37877	0.600013	2.1195	0.981059	-1.00918	-1.00864	-1.11348	-1.00356	2.60047	1.51573	4.34544
HLA-DPB1	722	0.21008	0.462689	0.67277	1.27817	0.312262	0.687738	0.712051	147.05	151.05	151.268	151.209	12.8761	8	58	1.90085e-10	9.03125	8.74577	8.70228	8.71348	7.36399	7.31908	6.79853	7.32495	6.00291	1.18589	0.915754	0.8746	0.885194	-0.391791	-0.43429	-0.926875	-0.428731	-1.67975	-0.285471	-0.328961	-0.317766	-1.66725	-1.71217	-2.23272	-1.70629	-3.02834	-1.21881	-1.25611	-1.2464	-3.1761	-3.27652	-4.70019	-3.26321
CX3CR1	723	0.425502	0.234573	0.660074	0.788822	0.644627	0.355373	0.768195	116.119	120.119	120.338	120.278	9.02327	8	58	6.01803e-08	8.75963	8.70327	8.41587	8.72153	9.05743	8.26523	7.63217	7.59783	6.10906	0.679401	0.617585	0.302346	0.637616	1.00605	0.137111	-0.557266	-0.594931	-2.22792	-0.0563563	-0.343756	-0.0380942	0.297805	-0.494399	-1.12745	-1.16179	-2.65057	-1.03984	-1.26906	-1.02676	1.22927	-1.40873	-2.18473	-2.23735
SLAMF1	724	0.0057074	0.508289	0.513997	0.592276	0.011104	0.988896	0.253446	142.308	146.308	146.526	146.467	2.2924	8	58	0.0330553	6.53546	6.38504	6.06567	6.29455	5.63235	6.97467	6.55988	6.13819	5.70782	0.660348	0.306368	-0.445182	0.093431	-1.4649	1.69394	0.717823	-0.274531	-1.2873	-0.15042	-0.469784	-0.240905	-0.903102	0.439216	0.0244235	-0.397267	-0.827633	-1.10989	-1.3849	-1.18173	-1.87008	1.35587	1.01707	-1.31701
BCL6	725	0.0708553	0.27215	0.343006	0.758016	0.206572	0.793428	0.710303	113.411	117.411	117.629	117.57	14.194	8	58	3.32795e-11	7.9995	8.10809	8.85856	8.71568	9.71035	9.6042	9.70408	8.97667	8.58268	-1.41342	-1.24628	-0.0911176	-0.311045	1.22	1.0566	1.21035	0.0906858	-0.515767	0.108591	0.85906	0.71618	1.71085	1.60469	1.70458	0.977172	0.583179	1.07817	1.81386	1.64283	3.27353	3.04131	3.25934	1.9686
STAT5A	726	0.0144147	0.164695	0.17911	0.520097	0.0804793	0.919521	0.73566	80.0926	84.0926	84.3108	84.2515	18.1999	8	58	2.89024e-13	6.93841	7.21659	7.35448	7.60862	8.65027	8.31676	8.10247	8.1293	7.5341	-1.45315	-0.961866	-0.718331	-0.269503	1.57012	0.981121	0.60267	0.650056	-0.401113	0.278179	0.416075	0.670214	1.71186	1.37835	1.16406	1.19089	0.595693	1.21266	1.33429	1.59131	3.27582	2.59971	2.24087	2.28294
ETS1	727	0.054146	0.13225	0.186396	0.732721	0.290488	0.709512	0.856084	73.8505	77.8505	78.0687	78.0094	37.0351	8	58	4.77975e-20	10.4415	10.2129	9.95939	9.90536	8.94228	8.66053	8.59144	8.40407	8.29735	1.38071	1.11176	0.813338	0.749755	-0.383714	-0.715313	-0.796633	-1.01714	-1.14275	-0.228518	-0.482077	-0.536102	-1.49918	-1.78093	-1.85003	-2.03739	-2.14412	-1.17163	-1.39675	-1.45005	-2.82682	-3.43648	-3.60507	-4.10502
RAG2	728	0	0.0951566	0.0951566	0.106329	0	1	0.213552	44.5153	46.5153	46.5867	46.5947	1.96866	8	58	0.0667592	4.81572	4.80253	4.80331	4.65523	4.45425	4.57977	4.42252	4.57605	4.48415	1.24421	1.15975	1.16471	0.216061	-1.07151	-0.26733	-1.27475	-0.291199	-0.879949	-0.0131838	-0.0124098	-0.160488	-0.36147	-0.235942	-0.393194	-0.239668	-0.331568	-1.00918	-1.00864	-1.11767	-1.28473	-1.17768	-1.3133	-1.18072
KLRG1	729	0.304128	0.572283	0.876411	0.909266	0.347015	0.652985	0.501034	160.259	164.259	164.477	164.418	2.52198	8	58	0.0199517	6.37445	6.39245	5.72044	5.97964	5.54834	5.62833	5.39656	5.5363	4.33638	1.17106	1.20045	0.103572	0.526648	-0.177334	-0.0467794	-0.425077	-0.196999	-2.15554	0.0180038	-0.654005	-0.394804	-0.826105	-0.746119	-0.977886	-0.838153	-2.03807	1.01256	-1.57353	-1.31476	-1.77289	-1.67728	-1.96958	-1.78776
TLR7	730	0.00010687	0.0933978	0.0935047	0.120417	0.00114294	0.998857	0.319155	43.4982	47.4982	47.7163	47.657	3.37846	8	58	0.00302	4.81572	4.80253	4.80331	4.80071	4.50342	4.4456	4.25288	4.53509	4.48283	1.02283	0.95893	0.962682	0.950101	-0.490722	-0.770986	-1.70502	-0.337249	-0.590558	-0.0131838	-0.0124098	-0.0150055	-0.312292	-0.370119	-0.56284	-0.280626	-0.332891	-1.00918	-1.00864	-1.01046	-1.24168	-1.29246	-1.47717	-1.21472
IL2RB	731	0.117738	0.445685	0.563423	0.668033	0.20897	0.79103	0.4619	142.089	146.089	146.308	146.248	3.48744	8	58	0.00237986	7.20434	6.92748	6.81856	6.55286	5.90384	6.43812	6.1392	6.72511	6.13685	1.56848	0.916325	0.659739	0.0338585	-1.49496	-0.236417	-0.940552	0.439621	-0.946096	-0.276855	-0.385781	-0.651481	-1.3005	-0.766218	-1.06514	-0.479226	-1.06749	-1.21155	-1.30657	-1.57078	-2.46314	-1.70081	-2.09237	-1.394
MR1	732	0.00343804	0.599364	0.602802	2.79572	0.00570343	0.994297	0.812615	151.575	155.575	155.793	155.734	31.2104	8	58	2.61744e-18	4.81572	4.97315	4.96736	6.17146	8.35928	8.32851	7.7894	7.45822	7.02928	-1.25892	-1.15114	-1.15511	-0.330817	1.1669	1.14583	0.776777	0.550059	0.25642	0.157437	0.151643	1.35574	3.54356	3.5128	2.97369	2.6425	2.21356	1.1153	1.11083	2.55929	11.6605	11.4145	7.85541	6.24414
TWIST2	733	0.0567653	0.596419	0.653184	2.93092	0.0869056	0.913094	0.830572	154.979	158.979	159.197	159.138	32.9763	8	58	7.33049e-19	4.8278	5.02977	5.33248	6.17586	8.57343	8.28906	8.08728	7.94858	7.55906	-1.3447	-1.21167	-1.01227	-0.456741	1.12254	0.93522	0.80231	0.710951	0.454369	0.201971	0.504683	1.34806	3.74564	3.46126	3.25949	3.12079	2.73126	1.15027	1.41881	2.5457	13.4137	11.014	9.57642	8.69863
IFNA4	734	0.0274295	0.499524	0.526953	0.679166	0.0520529	0.947947	0.377703	143.27	147.27	147.489	147.429	3.55117	8	58	0.00207116	4.81572	4.80253	4.80331	4.65523	4.45425	5.56808	4.94563	6.33649	5.52742	-0.479872	-0.502052	-0.50075	-0.749864	-1.08798	0.785839	-0.261311	2.07855	0.717439	-0.0131838	-0.0124098	-0.160488	-0.36147	0.752362	0.129917	1.52077	0.711703	-1.00918	-1.00864	-1.11767	-1.28473	1.68455	1.09423	2.86945
GNAS	735	0.00328029	0.0924692	0.0957495	0.123684	0.0342591	0.965741	0.36074	44.6282	48.6282	48.8463	48.787	3.48273	8	58	0.00240447	9.26817	9.25624	9.18904	9.36173	9.16731	8.82419	9.1712	8.64929	8.92017	0.753051	0.702696	0.419144	1.14783	0.327476	-1.12037	0.343876	-1.85835	-0.715351	-0.0119337	-0.079133	0.0935597	-0.100858	-0.443984	-0.0969708	-0.618879	-0.347998	-1.00831	-1.05638	1.067	-1.07241	-1.36036	-1.06953	-1.53568
JUN	736	0.0459659	0.223446	0.269412	0.680616	0.170616	0.829384	0.733243	100.9	104.9	105.118	105.059	16.6906	8	58	1.58259e-12	6.3728	6.57469	7.44398	6.72763	6.98778	7.85899	8.29328	8.11174	7.71523	-1.38139	-1.0939	0.143927	-0.876119	-0.505679	0.734894	1.35329	1.09479	0.530178	0.201893	1.07118	0.354834	0.614982	1.4862	1.92048	1.73894	1.34243	1.15021	2.10115	1.27884	1.53154	2.80149	3.78548	3.3379
KLRK1	737	0.177608	0.36683	0.544437	1.96977	0.326222	0.673778	0.852072	133.94	137.94	138.159	138.099	35.2119	8	58	1.57886e-19	8.4694	8.46329	7.78755	7.71976	6.63449	5.86887	5.15459	5.11575	5.19718	1.23047	1.22619	0.752971	0.705503	-0.0545019	-0.59066	-1.09086	-1.11807	-1.06104	-0.00610739	-0.681854	-0.749637	-1.83491	-2.60053	-3.31481	-3.35365	-3.27222	-1.00424	-1.6042	-1.68137	-3.56748	-6.06508	-9.95076	-10.2223
CD34	738	0	0.247836	0.247836	0.283614	0	1	0.232072	100.035	102.035	102.107	102.115	2.19099	8	58	0.041258	4.81572	4.80253	4.80331	4.65523	4.45425	5.04598	5.1124	5.50869	5.37781	-0.403458	-0.442237	-0.43996	-0.875524	-1.4667	0.273837	0.469229	1.63489	1.24992	-0.0131838	-0.0124098	-0.160488	-0.36147	0.23026	0.296687	0.692976	0.562098	-1.00918	-1.00864	-1.11767	-1.28473	1.17305	1.22832	1.61661
MAPK11	739	0.0254465	0.421057	0.446503	0.595246	0.0569906	0.943009	0.403061	133.573	137.573	137.791	137.732	3.98373	8	58	0.000813248	4.81572	4.80253	4.80331	4.65523	4.45425	5.53873	5.14504	6.28145	5.43788	-0.507616	-0.530847	-0.529483	-0.790411	-1.14456	0.766399	0.072682	2.07514	0.588695	-0.0131838	-0.0124098	-0.160488	-0.36147	0.723012	0.329323	1.46573	0.622164	-1.00918	-1.00864	-1.11767	-1.28473	1.65062	1.25642	2.76203
CCR1	740	0.27505	0.248086	0.523136	1.00238	0.525772	0.474228	0.806112	116.201	120.201	120.419	120.36	20.8296	8	58	1.85362e-14	6.5104	6.67565	7.00507	7.35538	8.14294	8.35765	8.74144	7.95349	7.55344	-1.39853	-1.18414	-0.756759	-0.302296	0.719452	0.998014	1.49592	0.473668	-0.0453302	0.165251	0.494678	0.844978	1.63254	1.84726	2.23105	1.44309	1.04305	1.12136	1.40901	1.79624	3.10059	3.59816	4.69475	2.71903
MYC	741	0.189747	0.233167	0.422915	0.670912	0.448666	0.551334	0.726575	110.69	114.69	114.908	114.849	10.8772	8	58	3.29185e-09	7.20062	7.2622	7.0971	7.06381	6.6023	6.00549	5.90714	5.79893	5.53674	1.02448	1.11417	0.873725	0.825247	0.153131	-0.716007	-0.85925	-1.01683	-1.39866	0.0615862	-0.103518	-0.136806	-0.59832	-1.19512	-1.29348	-1.40169	-1.66387	1.04361	-1.07439	-1.09947	-1.51395	-2.28964	-2.45119	-2.6421
IFNGR1	742	0.0559505	0.204737	0.260688	0.502266	0.214627	0.785373	0.671543	97.1345	101.134	101.353	101.293	11.3407	8	58	1.65852e-09	9.68137	9.8701	10.2388	10.0967	11.0695	10.8899	11.0258	10.2809	10.359	-1.41419	-1.03766	-0.302165	-0.585504	1.35514	0.996809	1.26796	-0.218173	-0.062211	0.188735	0.5574	0.415377	1.38812	1.20851	1.34442	0.5995	0.677676	1.13976	1.47161	1.33365	2.61737	2.31098	2.53928	1.51519
ITGB2	743	0.00757571	0.101835	0.10941	0.358011	0.0692413	0.930759	0.761385	51.7591	55.7591	55.9773	55.918	21.0987	8	58	1.41896e-14	9.68048	9.88594	9.98198	9.88587	10.2533	10.7642	11.2855	10.7546	10.7177	-1.24249	-0.864929	-0.688435	-0.865068	-0.189921	0.749002	1.70691	0.731295	0.663644	0.20546	0.301502	0.205384	0.572778	1.08371	1.60497	1.07407	1.03726	1.15305	1.23243	1.15299	1.48738	2.11948	3.0419	2.10537
IL2RG	744	0.0131351	0.172789	0.185924	0.420947	0.0706477	0.929352	0.655883	82.4824	86.4824	86.7006	86.6413	12.0091	8	58	6.33683e-10	7.9843	7.85787	7.77582	7.53258	7.77787	8.5842	9.26848	8.77465	8.14416	-0.359649	-0.581912	-0.726137	-1.15375	-0.722539	0.694959	1.89789	1.02976	-0.0786215	-0.126432	-0.208473	-0.451718	-0.206427	0.599904	1.28418	0.790352	0.15986	-1.09159	-1.15546	-1.36767	-1.15383	1.51562	2.43544	1.7295
MYD88	745	0.0869448	0.26833	0.355275	1.22874	0.244726	0.755274	0.824853	113.665	117.665	117.883	117.824	29.2114	8	58	1.18604e-17	7.7284	7.97761	8.24452	8.88187	9.72447	10.1233	10.3223	9.50202	9.5066	-1.46113	-1.19802	-0.916218	-0.243324	0.646262	1.06738	1.27739	0.411407	0.416242	0.249209	0.516125	1.15348	1.99607	2.39495	2.59387	1.77362	1.7782	1.18856	1.43011	2.22449	3.98913	5.25959	6.03714	3.41912
ATG10	746	0.0195739	0.234369	0.253943	0.275321	0.0770802	0.92292	0.288381	100.421	104.421	104.639	104.58	1.92276	8	58	0.0736542	5.86431	5.63769	5.51599	5.72984	5.3201	5.35524	5.56142	5.13272	4.96357	1.42512	0.6391	0.216973	0.958709	-0.462462	-0.340571	0.374573	-1.11239	-1.69906	-0.22662	-0.348324	-0.134473	-0.544213	-0.50907	-0.302886	-0.731594	-0.900739	-1.17009	-1.27308	-1.09769	-1.45822	-1.42313	-1.23361	-1.66047
ALOX5	747	0.271481	0.449361	0.720842	2.6831	0.376617	0.623383	0.867562	146.971	150.971	151.189	151.13	40.5549	8	58	5.42088e-21	5.1878	5.80311	6.30805	6.28346	7.60692	8.66137	9.37716	8.87253	9.43035	-1.40858	-1.03429	-0.727135	-0.742091	0.0629584	0.704377	1.13979	0.832823	1.17214	0.61531	1.12025	1.09566	2.41911	3.47357	4.18936	3.68473	4.24255	1.53189	2.17384	2.13711	5.34843	11.1083	18.2441	12.8592
CD1B	748	0.00777804	0.153227	0.161005	0.194576	0.0483092	0.951691	0.332336	74.565	78.565	78.7831	78.7238	2.9014	8	58	0.00862945	4.95843	4.96853	4.80331	4.72194	4.49518	4.4456	4.30592	4.72427	4.44448	1.28207	1.32431	0.633136	0.292769	-0.655885	-0.863293	-1.44761	0.302494	-0.867988	0.0100985	-0.155121	-0.236483	-0.463251	-0.512831	-0.652506	-0.234159	-0.513953	1.00702	-1.11352	-1.17812	-1.37865	-1.42685	-1.5719	-1.17622
PTGER3	749	0.0412479	0.554772	0.59602	1.69776	0.0692056	0.930794	0.725878	150.08	154.08	154.298	154.239	17.2885	8	58	7.97511e-13	4.81572	4.80253	4.80331	4.65523	4.45425	6.55643	6.90008	8.14167	6.53193	-0.702615	-0.712635	-0.712047	-0.824597	-0.977356	0.620446	0.881645	1.82533	0.601825	-0.0131838	-0.0124098	-0.160488	-0.36147	1.74071	2.08437	3.32595	1.71621	-1.00918	-1.00864	-1.11767	-1.28473	3.342	4.24089	10.0279
LILRA1	750	2.32277	0.225938	2.54871	2.44517	0.911352	0.0886479	0.928482	125.708	129.708	129.926	129.867	6.7691	8	58	3.08326e-06	5.89382	6.24866	6.12402	6.53022	6.9996	6.69058	7.11128	6.88487	6.34884	-1.54206	-0.691146	-0.990017	-0.0159553	1.1096	0.368586	1.37741	0.834479	-0.450901	0.354843	0.230209	0.636408	1.10578	0.796768	1.21746	0.991053	0.455029	1.27885	1.173	1.55445	2.15216	1.73721	2.32538	1.98763
CD5	751	0.0792723	0.437792	0.517064	0.67394	0.153312	0.846688	0.470087	139.365	143.365	143.583	143.524	4.1579	8	58	0.000560672	6.22755	6.11581	5.82002	5.55026	5.00046	5.81865	5.05455	6.45174	5.28763	1.01353	0.797636	0.226159	-0.295032	-1.35726	0.223514	-1.25277	1.44668	-0.802441	-0.111742	-0.40753	-0.67729	-1.22709	-0.408899	-1.173	0.224191	-0.939917	-1.08053	-1.32641	-1.59913	-2.34094	-1.32767	-2.2548	1.16812
HLA-DRB1	752	0.103249	0.516358	0.619607	1.85824	0.166637	0.833363	0.774024	149.359	153.359	153.577	153.518	21.1432	8	58	1.35801e-14	11.0505	10.9055	10.6643	11.0022	9.38173	8.64573	8.38966	7.98346	7.94429	1.10688	0.999745	0.821637	1.07116	-0.12571	-0.669328	-0.858467	-1.15849	-1.18742	-0.145051	-0.386188	-0.0483628	-1.66879	-2.40479	-2.66086	-3.06707	-3.10623	-1.10577	-1.30694	-1.03409	-3.17948	-5.29558	-6.32411	-8.38068
KLRF1	753	0.157252	0.213624	0.370876	0.907075	0.424001	0.575999	0.814416	105.008	109.008	109.226	109.166	23.2334	8	58	1.8502e-15	6.23011	6.23954	5.55621	5.68858	5.00664	4.4456	4.16991	4.26153	4.78781	1.33392	1.34562	0.498575	0.662656	-0.182655	-0.878102	-1.21984	-1.10627	-0.453907	0.00943731	-0.673899	-0.54153	-1.22347	-1.78451	-2.0602	-1.96858	-1.4423	1.00656	-1.59538	-1.45552	-2.33508	-3.44501	-4.17043	-3.91382
TRIM39	754	0	0.184308	0.184308	0.236879	0	1	0.316243	82.8582	84.8582	84.9296	84.9377	3.35317	8	58	0.00319198	6.65182	6.69541	6.56023	6.66979	6.95059	6.95657	6.66324	5.88712	5.61882	0.293944	0.389027	0.0941618	0.333146	0.945661	0.958706	0.318847	-1.37412	-1.95937	0.0435892	-0.0915871	0.0179715	0.298769	0.30475	0.0114162	-0.764699	-1.033	1.03067	-1.06554	1.01253	1.23009	1.2352	1.00794	-1.69902
HDAC3	755	0	0.0385675	0.0385675	0.0438054	0	1	0.22629	-7.86526	-5.86526	-5.79383	-5.78582	2.12043	8	58	0.0481043	6.7146	6.70888	6.74595	6.75191	6.47588	6.68682	6.87289	6.63585	6.8132	0.0251183	-0.0257138	0.304055	0.357041	-2.09869	-0.222038	1.43334	-0.675465	0.902353	-0.00571365	0.0313532	0.0373089	-0.238722	-0.0277809	0.158288	-0.0787472	0.0986033	-1.00397	1.02197	1.0262	-1.17995	-1.01944	1.11596	-1.0561
HPRT1	756	0.0117485	0.0642317	0.0759801	0.0953921	0.154626	0.845374	0.450899	28.0907	32.0907	32.3089	32.2496	3.79622	8	58	0.00121731	6.58297	6.46322	6.3895	6.45693	6.51179	6.3952	6.14298	5.91336	6.42279	1.05253	0.476124	0.121297	0.445842	0.709929	0.148728	-1.06538	-2.17062	0.28154	-0.119748	-0.193462	-0.126039	-0.0711754	-0.187764	-0.439991	-0.669602	-0.160172	-1.08654	-1.1435	-1.09129	-1.05057	-1.139	-1.3566	-1.59063
ABCF1	757	0.00595613	0.0575614	0.0635175	0.085453	0.0937715	0.906228	0.440633	19.6307	23.6307	23.8489	23.7896	4.4221	8	58	0.000320687	7.45915	7.53218	7.48307	7.51905	7.50463	7.78674	8.04045	7.6692	7.72831	-0.924469	-0.542437	-0.799327	-0.611128	-0.686565	0.789313	2.11661	0.174371	0.483635	0.0730252	0.0239208	0.0598951	0.0454752	0.327589	0.581301	0.210043	0.269159	1.05192	1.01672	1.04239	1.03202	1.25491	1.4962	1.15672
POLR2A	758	0.0170881	0.120383	0.137471	0.152046	0.124303	0.875697	0.349119	63.5211	67.5211	67.7393	67.68	2.23447	8	58	0.0375224	8.57729	8.65208	8.71516	8.82628	8.78679	9.15151	8.96762	8.80197	8.78988	-1.35611	-0.915781	-0.544363	0.109866	-0.122626	2.0247	0.942045	-0.0332759	-0.104456	0.0747885	0.137873	0.248992	0.209504	0.574221	0.390335	0.224679	0.21259	1.05321	1.10028	1.18838	1.15629	1.48887	1.3107	1.16852
PPIA	759	0.0545942	0.155744	0.210339	0.318483	0.259554	0.740446	0.608586	82.5155	86.5155	86.7337	86.6744	6.53874	8	58	4.74066e-06	11.5716	11.5959	11.7014	11.5993	11.8912	12.3328	12.1577	12.767	12.258	-0.991845	-0.933678	-0.681297	-0.925548	-0.227072	0.829581	0.410569	1.86872	0.650571	0.0243073	0.129775	0.0277047	0.319592	0.761158	0.586057	1.1954	0.686351	1.01699	1.09412	1.01939	1.24798	1.69485	1.50114	2.29009
G6PD	760	0.0327519	0.253284	0.286036	0.433092	0.114503	0.885497	0.517789	106.322	110.322	110.54	110.481	6.1191	8	58	1.05278e-05	6.06402	6.19647	6.72316	6.39221	7.00207	7.03985	7.32101	6.40473	6.77326	-1.40753	-1.09335	0.155926	-0.629062	0.817509	0.907112	1.57401	-0.599373	0.27476	0.132457	0.659139	0.328195	0.938056	0.975832	1.25699	0.340712	0.709238	1.09616	1.57914	1.25544	1.91594	1.96677	2.38996	1.26638
ALAS1	761	0.0255792	0.286724	0.312303	0.37751	0.0819052	0.918095	0.366357	112.305	116.305	116.523	116.464	3.0947	8	58	0.00563311	6.89149	7.30163	7.42747	7.16143	7.09845	7.70105	7.8966	7.33796	7.97991	-1.43664	-0.325499	0.0154141	-0.705312	-0.875949	0.756595	1.28637	-0.227061	1.51208	0.41014	0.535977	0.269945	0.20696	0.809559	1.00511	0.446475	1.08842	1.32882	1.44992	1.20576	1.15425	1.75268	2.00709	1.36271
OAZ1	762	0.164085	0.177975	0.342059	0.451233	0.479697	0.520303	0.690264	95.7874	99.7874	100.006	99.9463	5.06427	8	58	8.49331e-05	15.0261	15.2816	14.9429	15.5311	15.4838	14.9398	14.6648	14.2513	14.7387	0.101641	0.725587	-0.101394	1.33462	1.21916	-0.109113	-0.780484	-1.79008	-0.599936	0.255551	-0.0831576	0.504994	0.457703	-0.0863194	-0.361294	-0.774796	-0.287347	1.19379	-1.05933	1.41912	1.37335	-1.06166	-1.28458	-1.71095
ERCC3	763	0	0.0534975	0.0534975	0.0535431	0	1	0.121961	11.1138	13.1138	13.1852	13.1932	1.00704	8	58	0.440893	6.69885	6.70641	6.7324	6.55339	6.72299	6.63388	6.50667	6.73789	6.42618	0.557148	0.623522	0.851824	-0.720269	0.769199	-0.0134405	-1.13055	0.900049	-1.83748	0.00755791	0.033554	-0.145456	0.0241457	-0.0649713	-0.192174	0.0390452	-0.27267	1.00525	1.02353	-1.10608	1.01688	-1.04606	-1.14248	1.02743
SDHA	764	0.00742672	0.025615	0.0330418	0.0405228	0.224768	0.775232	0.491499	-23.1336	-19.1336	-18.9154	-18.9747	3.98368	8	58	0.000813331	7.01827	7.06315	7.1229	7.19256	7.25855	6.9712	6.89532	7.22709	7.07639	-0.607729	-0.236377	0.25808	0.834462	1.38047	-0.99724	-1.62506	1.12018	-0.126787	0.0448784	0.104634	0.174291	0.240276	-0.047073	-0.122946	0.208821	0.0581225	1.0316	1.07522	1.12841	1.18122	-1.03317	-1.08896	1.15574
PPBP	765	0.185932	0.352725	0.538657	0.609422	0.345178	0.654822	0.541075	132.144	136.144	136.362	136.303	3.43018	8	58	0.00269693	13.6589	13.5918	13.3417	13.5142	13.2451	13.1571	13.5229	12.5876	11.0555	0.709088	0.627649	0.323974	0.533376	0.206609	0.0997225	0.543999	-0.591887	-2.45253	-0.0670601	-0.317117	-0.144688	-0.41376	-0.501774	-0.135941	-1.07127	-2.60339	-1.04758	-1.24584	-1.10549	-1.33215	-1.41595	-1.09881	-2.10128
DDX50	766	0.01035	0.13024	0.14059	0.1636	0.0736184	0.926382	0.333497	66.2061	70.2061	70.4243	70.365	2.62148	8	58	0.0160177	7.74839	7.698	7.61316	7.35365	7.58416	7.34768	7.18294	7.26844	7.08746	1.33957	1.12655	0.767855	-0.329326	0.645235	-0.354564	-1.05103	-0.689571	-1.45471	-0.0503849	-0.135226	-0.39474	-0.164229	-0.40071	-0.565444	-0.479949	-0.660926	-1.03554	-1.09826	-1.31471	-1.12057	-1.32016	-1.47984	-1.39469
TBP	767	0.029091	0.175671	0.204762	0.368236	0.142072	0.857928	0.609741	86.0385	90.0385	90.2567	90.1974	8.94566	8	58	6.83836e-08	5.97667	6.19166	5.9647	5.61675	4.95097	5.01771	5.60552	5.25907	5.50111	0.950782	1.44718	0.923122	0.119709	-1.41761	-1.26348	0.0937806	-0.706186	-0.147302	0.214983	-0.0119788	-0.359924	-1.02571	-0.95896	-0.371153	-0.717605	-0.475561	1.16069	-1.00834	-1.28336	-2.03596	-1.94391	-1.29339	-1.64445
TUBB	768	0.0753751	0.130125	0.2055	0.395389	0.366789	0.633211	0.73954	74.846	78.846	79.0642	79.0049	14.1845	8	58	3.3688e-11	8.21834	8.26566	8.04725	8.11662	7.58019	7.05941	7.24941	6.98846	7.84964	1.01032	1.10405	0.67139	0.808807	-0.253842	-1.2855	-0.909113	-1.42605	0.279935	0.0473176	-0.171091	-0.101723	-0.638151	-1.15893	-0.968934	-1.22988	-0.368699	1.03334	-1.12591	-1.07305	-1.55633	-2.23292	-1.95739	-2.34548
GUSB	769	0.0171252	0.082416	0.0995412	0.405251	0.172041	0.827959	0.834804	43.0954	47.0954	47.3136	47.2543	32.7669	8	58	8.50041e-19	6.64255	6.61304	6.62196	6.44876	6.53403	7.57395	8.12028	7.80746	8.10492	-0.721761	-0.762688	-0.750314	-0.990519	-0.872253	0.569918	1.32758	0.893758	1.30628	-0.0295111	-0.0205884	-0.193794	-0.108516	0.931398	1.47773	1.16491	1.46237	-1.02067	-1.01437	-1.14377	-1.07812	1.90712	2.78509	2.24219
UBB	770	0.383238	0.72936	1.1126	1.54313	0.344453	0.655547	0.625209	174.262	178.262	178.48	178.421	5.67972	8	58	2.47613e-05	13.0494	13.0811	12.5151	13.2196	13.4595	13.2218	11.7153	10.7592	11.0894	0.584804	0.616007	0.0575912	0.752681	0.989425	0.754832	-0.731508	-1.67482	-1.34901	0.031626	-0.534358	0.170153	0.410106	0.172333	-1.33415	-2.29025	-1.96003	1.02216	-1.4483	1.12518	1.32878	1.12688	-2.52127	-4.89141
[truncated: 43 more columns]
