# Supplementary material for: Transcriptomic Analysis Reveals Host miRNAs Correlated with Immune Gene Dysregulation during Fatal Disease Progression in the Ebola Virus Cynomolgus Macaque Disease Model
Source: Microorganisms. 2021 Mar 23;9(3):665. doi: 10.3390/microorganisms9030665 (PMC8005181; doi:10.3390/microorganisms9030665)
Supplement: Supplementary file 1 [file microorganisms-09-00665-s001.zip › Supplemental Table S7 - Binned mRNA expression analysis.xlsx]

## Sheet: mrna_nstringn_datat_amr
Label	_Row	Variance_ID	Variance_Residual	SumVariance	SampleVariance	PropVar_ID	PropVar_Residual	RSquare	N2RLL	AIC	AICC	BIC	F_T3_BIN	NDF_T3_BIN	DDF_T3_BIN	PrF_T3_BIN	Lsmean BIN Early	Lsmean BIN Incubation	Lsmean BIN Late	Lsmean BIN Mid	Lsmean BIN Not Infected	Std Lsmean BIN Early	Std Lsmean BIN Incubation	Std Lsmean BIN Late	Std Lsmean BIN Mid	Std Lsmean BIN Not Infected	Diff of BIN = (Early)-(Not Infected)	Diff of BIN = (Incubation)-(Not Infected)	Diff of BIN = (Late)-(Not Infected)	Diff of BIN = (Mid)-(Not Infected)	Exp2 Diff of BIN = (Early)-(Not Infected)	Exp2 Diff of BIN = (Incubation)-(Not Infected)	Exp2 Diff of BIN = (Late)-(Not Infected)	Exp2 Diff of BIN = (Mid)-(Not Infected)	t-Statistic for Diff of BIN = (Early)-(Not Infected)	t-Statistic for Diff of BIN = (Incubation)-(Not Infected)	t-Statistic for Diff of BIN = (Late)-(Not Infected)	t-Statistic for Diff of BIN = (Mid)-(Not Infected)	p-Value for Diff of BIN = (Early)-(Not Infected)	p-Value for Diff of BIN = (Incubation)-(Not Infected)	p-Value for Diff of BIN = (Late)-(Not Infected)	p-Value for Diff of BIN = (Mid)-(Not Infected)	-log10(p-value) for Diff of BIN = (Early)-(Not Infected)	-log10(p-value) for Diff of BIN = (Incubation)-(Not Infected)	-log10(p-value) for Diff of BIN = (Late)-(Not Infected)	-log10(p-value) for Diff of BIN = (Mid)-(Not Infected)	Adjusted p-Value for Diff of BIN = (Early)-(Not Infected)	Adjusted p-Value for Diff of BIN = (Incubation)-(Not Infected)	Adjusted p-Value for Diff of BIN = (Late)-(Not Infected)
PTGS1	1	0.189651	0.407235	0.596885	0.622722	0.317734	0.682266	0.440433	143.777	147.777	147.98	147.936	3.38769	4	62	0.0143105	5.25737	5.30753	6.13796	5.85609	5.47757	-0.924853	-0.792297	1.4025	0.657533	-0.34288	-0.220197	-0.170043	0.660388	0.37852	-1.16489	-1.12509	1.58051	1.30001	-0.976928	-0.704847	2.08819	1.45079	0.332402	0.483545	0.0408944	0.15188	0.478337	0.315563	1.38834	0.8185	0.447268	0.607389	0.073187
C1QBP	2	0.277814	0.287569	0.565383	0.498187	0.491373	0.508627	0.511994	126.505	130.505	130.708	130.663	0.411601	4	62	0.799622	7.52756	7.34371	7.29107	7.46382	7.51432	0.942994	-0.800039	-1.29913	0.338731	0.817446	0.0132421	-0.170603	-0.223245	-0.0504921	1.00922	-1.12553	-1.16736	-1.03562	0.069805	-0.838348	-0.838353	-0.229895	0.944574	0.405056	0.405053	0.81893	0.0247642	0.392485	0.392488	0.0867531	0.958895	0.525306	0.525306
MAFK	3	0.0422516	0.488738	0.530989	0.868793	0.0795714	0.920429	0.496091	147.874	151.874	152.077	152.033	12.6629	4	62	1.36324e-07	4.6509	4.78259	6.77695	5.50991	4.86477	-0.756371	-0.60683	1.65771	0.219018	-0.513521	-0.213875	-0.0821762	1.91217	0.645139	-1.1598	-1.05861	3.76376	1.56389	-0.871605	-0.315712	5.56168	2.27284	0.386787	0.753281	6.04155e-07	0.0265128	0.412529	0.123043	6.21885	1.57654	0.506076	0.818091	2.67356e-06
NFE2L2	4	0.0109752	0.188762	0.199737	0.414122	0.054948	0.945052	0.58728	87.8777	91.8777	92.081	92.0365	20.317	4	62	9.83289e-11	8.97701	8.65273	9.08851	9.93977	8.47502	-0.0875381	-0.659851	0.10925	1.61162	-0.973483	0.501986	0.177707	0.613488	1.46475	1.41616	1.13108	1.52995	2.76015	3.29696	1.10273	2.87635	8.31756	0.00162055	0.274406	0.00550891	1.11455e-11	2.79034	0.561607	2.25893	10.9529	0.00391475	0.382949	0.0121543
SOCS1	5	0.00191477	0.790937	0.792852	2.1201	0.00241504	0.997585	0.650307	174.14	178.14	178.344	178.299	28.7049	4	62	1.64283e-13	6.88706	4.96604	7.78474	7.53946	4.93765	0.335673	-1.05386	0.984993	0.80758	-1.07439	1.94941	0.0283872	2.84709	2.60181	3.86215	1.01987	7.19546	6.07049	6.2881	0.0871484	6.55843	7.25836	3.60646e-08	0.930834	1.24202e-08	7.67066e-10	7.44292	0.0311276	7.90587	9.11517	2.00503e-07	0.948896	7.60519e-08
DOCK9	6	0.388701	0.259758	0.648459	0.674859	0.599423	0.400577	0.676112	122.973	126.973	127.176	127.132	9.25638	4	62	6.25222e-06	5.91961	6.21972	5.43712	5.44359	6.51849	0.0249915	0.65509	-0.988029	-0.974435	1.28238	-0.598883	-0.298773	-1.08137	-1.0749	-1.51454	-1.2301	-2.11605	-2.10658	-3.31972	-1.54253	-4.2694	-5.14598	0.00151255	0.128034	6.84205e-05	2.90429e-06	2.82029	0.892676	4.16481	5.53696	0.00369148	0.197666	0.000205796
TLR6	7	0.194008	0.773851	0.967858	1.22794	0.200451	0.799549	0.45272	180.406	184.406	184.61	184.565	8.03667	4	62	2.75476e-05	9.85285	8.89828	8.60108	9.64482	8.30013	1.18779	-0.241257	-0.686178	0.876358	-1.13671	1.55271	0.598143	0.300946	1.34469	2.93368	1.51377	1.23195	2.53975	5.00711	1.80725	0.692042	3.74701	4.86342e-06	0.0755756	0.491495	0.000394959	5.31306	1.12162	0.308481	3.40345	1.76643e-05	0.125484	0.614119
STAT4	8	0.0473969	0.0896063	0.137003	0.219532	0.345955	0.654045	0.651627	50.6238	54.6238	54.8272	54.7827	19.1229	4	62	2.74293e-10	6.28248	6.43246	5.5034	5.99155	6.67415	0.234587	0.567524	-1.49492	-0.411251	1.10406	-0.391669	-0.241693	-1.17075	-0.682597	-1.31191	-1.18238	-2.25129	-1.60503	-3.70323	-2.13404	-7.88872	-5.57535	0.000455037	0.0368019	6.17295e-11	5.73406e-07	3.34195	1.43413	10.2095	6.24154	0.00121133	0.0667155	6.38009e-10
CCL15	9	0	0.272811	0.272811	0.273758	0	1	0.0638548	108.009	110.009	110.076	110.088	1.05726	4	62	0.385286	4.65836	4.77965	5.13353	4.71832	4.84869	-0.915344	-0.259768	1.65295	-0.59124	0.113402	-0.190334	-0.0690421	0.28484	-0.130369	-1.14103	-1.04902	1.21827	-1.09457	-1.04574	-0.361198	1.11762	-0.619491	0.299741	0.719179	0.268042	0.537863	0.523254	0.143163	0.571797	0.269328	0.413066	0.795643	0.3756
C1QA	10	0	0.409161	0.409161	0.736065	0	1	0.477813	133.139	135.139	135.206	135.219	14.1829	4	62	2.82877e-08	5.13507	4.83644	6.58331	6.06921	4.84869	-0.455144	-0.833263	1.37854	0.727617	-0.81775	0.286385	-0.0122519	1.73462	1.22052	1.21958	-1.00853	3.32792	2.33031	1.28482	-0.0523382	5.55753	4.73576	0.203635	0.958428	6.13809e-07	1.31187e-05	0.691148	0.0184407	6.21197	4.88211	0.29684	0.966587	2.7085e-06
C8B	11	0.000854061	0.346492	0.347346	0.522694	0.00245882	0.997541	0.378658	122.971	126.971	127.174	127.129	9.35172	4	62	5.58279e-06	4.81602	4.78028	5.96671	5.73238	4.849	-0.720362	-0.782719	1.28738	0.87851	-0.662806	-0.0329874	-0.0687259	1.11771	0.883375	-1.02313	-1.04879	2.17002	1.84469	-0.160763	-0.318768	3.89	3.72331	0.872802	0.750974	0.000247225	0.000426471	0.0590841	0.124375	3.60691	3.37011	0.903	0.81707	0.000689096
TSLP	12	0	0.104401	0.104401	0.102474	0	1	0.0429386	48.4553	50.4553	50.522	50.5348	0.695409	4	62	0.59799	4.71693	4.77965	4.89498	4.87294	4.84869	-1.443	-0.586881	0.987573	0.686686	0.355626	-0.131756	-0.0690421	0.0462924	0.0242513	-1.09563	-1.04902	1.03261	1.01695	-1.1702	-0.583882	0.293618	0.186283	0.246401	0.561418	0.770031	0.852831	0.608358	0.250714	0.113492	0.0691372	0.3507	0.680775	0.830716
HMGB1	13	0.0017868	0.121333	0.123119	0.177517	0.0145128	0.985487	0.365661	58.564	62.564	62.7673	62.7228	8.4409	4	62	1.67323e-05	10.916	10.6007	9.99653	10.5581	10.6166	1.13242	0.188996	-1.61932	0.0614123	0.236489	0.299356	-0.0158685	-0.620076	-0.0584978	1.23059	-1.01106	-1.53696	-1.04138	2.46153	-0.123921	-3.64097	-0.415978	0.0166303	0.901779	0.000555692	0.678862	1.7791	0.0449	3.25517	0.168218	0.0326874	0.925826	0.001448
MX1	14	0.0201617	1.92196	1.94212	9.76353	0.0103813	0.989619	0.816717	229.625	233.625	233.828	233.784	68.1994	4	62	5.19e-22	12.6141	8.09726	12.8761	14.2062	7.10259	0.516875	-0.911158	0.599705	1.02021	-1.22563	5.51154	0.994669	5.77353	7.10357	45.6182	1.99262	54.7023	137.527	11.3927	1.954	8.52238	12.6986	7.61853e-17	0.0552162	4.93215e-12	6.65918e-19	16.1181	1.25793	11.307	18.1766	5.86627e-15	0.095704	6.69208e-11
STAT2	15	0.0457966	0.69327	0.739066	2.17255	0.0619655	0.938035	0.712023	168.834	172.834	173.037	172.993	36.0188	4	62	1.53055e-15	11.3527	9.24509	10.7378	11.3849	8.44007	0.845494	-0.744735	0.381539	0.869848	-1.35215	2.91258	0.805015	2.29769	2.94486	7.52964	1.74716	4.9167	7.7	9.97687	2.60355	5.61816	8.72118	1.63166e-14	0.0115303	4.86753e-07	2.23984e-12	13.7874	1.93816	6.31269	11.6498	4.69674e-13	0.0234877	2.21448e-06
IL8	16	0.186239	1.33565	1.52189	1.74051	0.122374	0.877626	0.322223	211.779	215.779	215.982	215.938	4.29019	4	62	0.00396248	10.935	11.0114	11.2252	12.6123	11.2097	-0.672244	-0.561425	-0.251532	1.75914	-0.27394	-0.274771	-0.198323	0.015458	1.40252	-1.2098	-1.14736	1.01077	2.64364	-0.676011	-0.458681	0.0271334	2.98242	0.501548	0.648067	0.97844	0.00408445	0.299688	0.18838	0.00946559	2.38887	0.624148	0.747863	0.982267
ILF3	17	0.0187121	0.0629089	0.081621	0.218491	0.229256	0.770744	0.751074	25.6283	29.6283	29.8317	29.7872	39.6882	4	62	1.86334e-16	7.76076	8.18896	7.29364	7.22818	8.24346	0.0370924	0.931602	-0.938702	-1.07545	1.04546	-0.482706	-0.0545032	-0.949819	-1.01528	-1.39736	-1.0385	-1.93163	-2.0213	-5.45619	-0.576728	-7.65475	-9.91589	9.03029e-07	0.566211	1.57297e-10	2.06585e-14	6.0443	0.247022	9.80328	13.6849	3.87372e-06	0.684163	1.45927e-09
DEFA1	18	1.05982	0.66395	1.72377	1.84884	0.614826	0.385174	0.697984	181.575	185.575	185.779	185.734	11.6176	4	62	4.20982e-07	8.25724	7.56741	8.99154	9.09114	7.19637	0.043402	-0.776836	0.916507	1.03494	-1.21801	1.06087	0.371038	1.79517	1.89477	2.08619	1.29328	3.47056	3.71864	3.67798	1.19799	4.43274	5.67335	0.00049356	0.235482	3.86922e-05	3.93873e-07	3.30666	0.628042	4.41238	6.40464	0.00130486	0.336774	0.000120742
AREG	19	0.0108792	0.230096	0.240975	0.39296	0.0451465	0.954853	0.467134	99.7227	103.723	103.926	103.882	12.0526	4	62	2.62081e-07	4.71888	4.79927	5.38055	5.83678	4.83965	-0.824283	-0.657004	0.552487	1.50178	-0.572983	-0.120775	-0.0403802	0.5409	0.997131	-1.08732	-1.02838	1.45488	1.99603	-0.718996	-0.22736	2.29889	5.1326	0.474845	0.820892	0.0248944	3.05293e-06	0.323449	0.0857142	1.6039	5.51528	0.598903	0.863801	0.0471264
IL22	20	0.0392921	0.486953	0.526245	0.746933	0.074665	0.925335	0.414875	147.452	151.452	151.656	151.611	8.63625	4	62	1.31832e-05	4.69249	4.77806	6.45139	5.36206	4.86542	-0.735517	-0.618397	1.67184	0.180903	-0.498827	-0.172935	-0.0873626	1.58597	0.496636	-1.12735	-1.06243	3.0021	1.41092	-0.706251	-0.336481	4.62284	1.7534	0.482677	0.737644	1.96983e-05	0.0844755	0.316343	0.132153	4.70557	1.07327	0.606547	0.809673	6.37967e-05
MAP3K1	21	0	0.192232	0.192232	0.193518	0	1	0.0668511	86.3041	88.3041	88.3708	88.3835	1.11043	4	62	0.359712	8.82784	8.72405	8.52175	8.52891	8.67837	1.30851	0.517362	-1.02481	-0.970209	0.169144	0.149465	0.0456803	-0.156626	-0.149464	1.10916	1.03217	-1.11468	-1.10916	0.97829	0.284695	-0.732109	-0.846084	0.331733	0.776827	0.466861	0.40076	0.479212	0.109676	0.330813	0.397116	0.44674	0.835689	0.591985
HLA-C	22	7.49017	0.281659	7.77183	6.91631	0.963759	0.036241	0.966043	147.608	151.608	151.812	151.767	3.05018	4	62	0.0232609	7.99883	7.66869	8.11503	7.97432	7.45949	0.574782	-0.645075	1.00411	0.484205	-1.41803	0.539339	0.209194	0.655535	0.514825	1.45331	1.15604	1.5752	1.42882	2.86782	1.03431	2.48167	2.36384	0.00564137	0.305011	0.0158012	0.0212341	2.24862	0.515684	1.80131	1.67297	0.0122794	0.41827	0.0312373
IL21	23	0.0616456	0.0882436	0.149889	0.247925	0.411274	0.588726	0.697693	51.2899	55.2899	55.4933	55.4488	24.4857	4	62	3.48247e-12	6.74712	6.9003	6.28971	6.16903	7.25539	0.167558	0.510692	-0.857007	-1.12731	1.30607	-0.508279	-0.35509	-0.965687	-1.08636	-1.42235	-1.27907	-1.95299	-2.12338	-4.83969	-3.15454	-6.55163	-8.93514	8.9929e-06	0.00247952	1.27586e-08	9.60171e-13	5.0461	2.60563	7.8942	12.0177	3.10517e-05	0.00582527	7.79691e-08
ANP32B	24	0.0394984	0.0683644	0.107863	0.139946	0.366191	0.633809	0.58375	34.3528	38.3528	38.5562	38.5117	12.1212	4	62	2.4335e-07	8.29907	8.70482	8.24901	8.23825	8.75297	-0.582106	0.99507	-0.776701	-0.818525	1.18226	-0.453905	-0.0481573	-0.503966	-0.514726	-1.36974	-1.03394	-1.41811	-1.42872	-4.91233	-0.486552	-3.88666	-4.81209	6.89426e-06	0.628291	0.000249964	9.94449e-06	5.16151	0.201839	3.60212	5.00242	2.42401e-05	0.731897	0.000696101
LCP2	25	0.0575495	0.232372	0.289922	0.480749	0.1985	0.8015	0.5801	105.761	109.761	109.964	109.92	15.0445	4	62	1.19873e-08	10.8149	10.3204	9.24332	10.4065	9.91514	1.13511	0.303417	-1.50844	0.448251	-0.378338	0.89971	0.405287	-0.671819	0.491388	1.86569	1.32435	-1.59308	1.4058	5.29485	2.23491	-2.8194	2.49888	1.66245e-06	0.0290362	0.00645126	0.015122	5.77925	1.53706	2.19036	1.82039	6.71243e-06	0.0541352	0.0138659
TRAF5	26	0.0712337	0.234416	0.305649	0.614985	0.233057	0.766943	0.670637	107.29	111.29	111.493	111.448	24.6579	4	62	3.05599e-12	5.88742	6.47239	5.233	5.0868	6.71852	0.0107517	0.817725	-0.892025	-1.09372	1.15727	-0.831101	-0.246133	-1.48552	-1.63172	-1.77904	-1.18602	-2.80017	-3.09883	-4.86623	-1.34898	-6.20142	-8.25505	8.1622e-06	0.18225	5.06793e-08	1.42993e-11	5.08819	0.739333	7.29517	10.8447	2.83423e-05	0.269611	2.73366e-07
MAF	27	0.0460267	0.264176	0.310203	0.437053	0.148376	0.851624	0.46965	112.173	116.173	116.376	116.332	10.312	4	62	1.82144e-06	6.45762	6.42278	5.25501	5.87207	6.66184	0.566168	0.505243	-1.53691	-0.457807	0.923308	-0.204224	-0.239064	-1.40684	-0.789768	-1.15207	-1.18023	-2.65155	-1.7288	-1.12874	-1.24047	-5.54646	-3.77242	0.263358	0.219474	6.40312e-07	0.000363651	0.579454	0.658618	6.19361	3.43932	0.370215	0.31647	2.81335e-06
TGFB3	28	0.00387705	0.0695592	0.0734362	0.106665	0.0527948	0.947205	0.408893	25.8892	29.8892	30.0926	30.0481	9.09332	4	62	7.59526e-06	4.57433	4.78919	4.67981	4.26823	4.84375	-0.249097	0.694316	0.214035	-1.59311	0.933852	-0.269416	-0.0545543	-0.163938	-0.575514	-1.20532	-1.03854	-1.12034	-1.49021	-2.91538	-0.557877	-1.2664	-5.38446	0.0049384	0.578937	0.210106	1.18532e-06	2.30641	0.237368	0.677561	5.92616	0.0109584	0.695176	0.304961
NOTCH1	29	0.103015	0.376633	0.479649	0.916367	0.214772	0.785228	0.643892	136.173	140.173	140.377	140.332	21.3977	4	62	3.9952e-11	6.17771	5.88303	7.69325	7.24463	5.51994	-0.352398	-0.670929	1.28584	0.800903	-1.06341	0.657763	0.363089	2.1733	1.72469	1.57763	1.28618	4.51055	3.30509	3.03948	1.57132	7.16085	6.88641	0.00346793	0.121197	1.13214e-09	3.3799e-09	2.45993	0.916508	8.9461	8.4711	0.00791201	0.18891	8.60984e-09
MAP4K4	30	0.11028	0.22266	0.332939	0.39994	0.331231	0.668769	0.524219	106.687	110.687	110.89	110.846	7.4737	4	62	5.58279e-05	8.83407	8.7322	8.3296	9.44495	8.56864	0.125182	-0.119224	-1.08516	1.59084	-0.511639	0.265426	0.163558	-0.239042	0.876309	1.20199	1.12005	-1.18021	1.83567	1.5923	0.916509	-1.02201	4.54145	0.116404	0.362952	0.310746	2.63387e-05	0.934033	0.440151	0.507594	4.57941	0.182269	0.480194	0.424286
TLR2	31	0.0967823	0.525236	0.622018	1.23361	0.155594	0.844406	0.627031	155.013	159.013	159.216	159.172	22.0728	4	62	2.3055e-11	10.6462	9.3015	10.3204	11.0266	8.82428	0.671042	-0.778699	0.319739	1.0811	-1.29318	1.82195	0.477219	1.4961	2.20231	3.5356	1.39206	2.82078	4.60216	7.13994	1.75519	4.18199	7.45865	1.23063e-09	0.0841658	9.24538e-05	3.44535e-10	8.90987	1.07486	4.03408	9.46277	9.19989e-09	0.137742	0.000272756
AIRE	32	0.0429788	0.549497	0.592476	0.839574	0.0725411	0.927459	0.412067	154.859	158.859	159.062	159.018	8.62321	4	62	1.33941e-05	4.69962	4.77624	6.36181	5.70368	4.86494	-0.800324	-0.694894	1.48681	0.581244	-0.57284	-0.165325	-0.088703	1.49686	0.838737	-1.12142	-1.06341	2.82229	1.78848	-0.635669	-0.321712	4.1079	2.78798	0.527332	0.748753	0.000119049	0.00703271	0.277916	0.125661	3.92427	2.15288	0.650193	0.816789	0.00034657
IKZF2	33	0.025163	0.207126	0.232288	0.256275	0.108326	0.891674	0.283222	95.7258	99.7258	99.9292	99.8847	3.29484	4	62	0.016353	6.24383	6.20006	5.57529	6.3241	6.32485	0.347996	0.209795	-1.76309	0.601475	0.60383	-0.0810172	-0.124782	-0.749554	-0.000745795	-1.05776	-1.09034	-1.68127	-1.00052	-0.506454	-0.733886	-3.34334	-0.00402979	0.614334	0.465784	0.00140768	0.996798	0.211595	0.331815	2.8515	0.001393	0.721093	0.590863	0.00345195
IL1A	34	0	0.157301	0.157301	0.169525	0	1	0.128343	73.8706	75.8706	75.9372	75.95	2.28221	4	62	0.0704418	4.58165	4.77965	5.09527	4.72862	4.84869	-1.1927	-0.143729	1.52842	-0.414045	0.222049	-0.267039	-0.0690421	0.246584	-0.120065	-1.20334	-1.04902	1.18639	-1.08678	-1.93219	-0.475676	1.27416	-0.751351	0.0579087	0.635977	0.207363	0.455284	1.23726	0.196559	0.683269	0.341717	0.0993563	0.738337	0.301405
EDNRB	35	0.00649769	0.228435	0.234933	0.333801	0.0276576	0.972342	0.370727	98.4554	102.455	102.659	102.614	8.32825	4	62	1.92127e-05	4.57895	4.78282	5.51669	5.42626	4.84754	-1.08574	-0.595475	1.16926	0.951805	-0.439852	-0.268594	-0.064716	0.669154	0.578724	-1.20463	-1.04588	1.59014	1.49353	-1.60731	-0.367075	2.8592	2.99471	0.113067	0.714813	0.0057784	0.0039436	0.946664	0.145807	2.23819	2.40411	0.177858	0.793536	0.0125423
TBK1	36	0.0294875	0.21198	0.241467	0.487925	0.122118	0.877882	0.616257	97.6477	101.648	101.851	101.807	21.8949	4	62	2.66237e-11	7.97404	7.25036	8.16616	8.43583	6.99233	0.341543	-0.833784	0.653554	1.09152	-1.25284	0.981713	0.258024	1.17383	1.4435	1.97481	1.19584	2.2561	2.7198	6.06276	1.49799	5.17201	7.70511	8.71649e-08	0.139211	2.63539e-06	1.28612e-10	7.05966	0.856327	5.57915	9.89072	4.46702e-07	0.21274	1.00458e-05
HLA-DMB	37	0.0159176	0.20098	0.216897	0.383251	0.0733876	0.926612	0.529089	92.5333	96.5333	96.7367	96.6922	15.2347	4	62	9.94782e-09	5.03936	5.38748	4.48479	4.24701	5.39179	0.246831	0.911517	-0.812043	-1.26605	0.919741	-0.352428	-0.00430685	-0.907001	-1.14478	-1.27671	-1.00299	-1.87514	-2.21112	-2.24052	-0.0258251	-4.11554	-6.29171	0.02865	0.97948	0.000115997	3.55573e-08	1.54287	0.00900453	3.93555	7.44907	0.0535125	0.98267	0.000338004
IL12B	38	0.0561112	0.336211	0.392322	0.661438	0.143023	0.856977	0.553444	126.948	130.948	131.152	131.107	14.5918	4	62	1.87656e-08	4.62901	4.79505	6.34698	5.70909	4.86836	-0.8738	-0.64735	1.46925	0.599262	-0.547362	-0.23935	-0.073313	1.47862	0.840725	-1.18046	-1.05213	2.78681	1.79095	-1.17283	-0.337349	5.16844	3.56039	0.24535	0.736993	2.67077e-06	0.000717772	0.610214	0.132537	5.57336	3.14401	0.349366	0.809247	1.01681e-05
TAP1	39	0.0411577	0.564827	0.605985	1.36724	0.0679188	0.932081	0.62817	156.377	160.377	160.58	160.536	24.1938	4	62	4.35121e-12	11.719	10.2521	11.4244	11.9212	9.63161	0.731423	-0.739665	0.436013	0.934225	-1.362	2.08736	0.620531	1.79281	2.28958	4.2497	1.53744	3.46488	4.88913	7.91843	2.22134	4.85442	7.50892	5.48181e-11	0.0299888	8.5221e-06	2.81809e-10	10.2611	1.52304	5.06945	9.55005	5.70404e-10	0.05581	2.95254e-05
CD40	40	0.0318433	0.229959	0.261802	0.377339	0.121631	0.878369	0.461632	102.678	106.678	106.882	106.837	9.35816	4	62	5.54027e-06	5.16813	5.81445	5.76751	5.63478	6.16176	-1.50451	0.29223	0.161753	-0.207235	1.25776	-0.993635	-0.347317	-0.394252	-0.526983	-1.9912	-1.27219	-1.31426	-1.44091	-5.89173	-1.93605	-1.66786	-2.70078	1.69541e-07	0.057424	0.100386	0.00890779	6.77073	1.24091	0.998325	2.05023	8.24939e-07	0.0986976	0.160535
HSD11B1	41	0	0.276145	0.276145	0.652368	0	1	0.602359	108.762	110.762	110.829	110.841	23.4799	4	62	7.55282e-12	4.73977	4.77965	6.60739	5.91172	4.84869	-0.75654	-0.70923	1.45922	0.633869	-0.627318	-0.108918	-0.0690421	1.7587	1.06303	-1.07842	-1.04902	3.38394	2.08932	-0.594803	-0.359012	6.85881	5.02075	0.55414	0.720806	3.77204e-09	4.62432e-06	0.25638	0.142182	8.42342	5.33495	0.674339	0.796871	2.54778e-08
IKBKG	42	0.047995	0.15878	0.206775	0.246537	0.232112	0.767888	0.44342	83.1095	87.1095	87.3129	87.2684	6.227	4	62	0.000280706	6.42435	6.23411	5.92476	6.644	5.96862	0.608666	-0.0166226	-1.03341	1.33062	-0.889249	0.455731	0.265491	-0.0438608	0.67538	1.37148	1.20204	-1.03087	1.59702	3.24228	1.76807	-0.222482	4.15169	0.00191045	0.0819691	0.82467	0.00010255	2.71886	1.08635	0.08372	3.98906	0.00456847	0.134504	0.866888
NOS2	43	0.0332775	0.406786	0.440063	0.598279	0.0756198	0.92438	0.389994	136.338	140.338	140.541	140.497	7.5042	4	62	5.37126e-05	4.68449	4.77477	6.24157	5.1231	4.86713	-0.710966	-0.569508	1.72893	-0.0236791	-0.424775	-0.18264	-0.0923652	1.37444	0.255969	-1.13496	-1.06612	2.59267	1.19414	-0.816036	-0.389176	4.383	0.9887	0.417604	0.698479	4.60725e-05	0.326653	0.379236	0.155846	4.33656	0.485914	0.540201	0.783366	0.000142473
TNFSF18	44	0.00422296	0.0742741	0.078497	0.112987	0.0537977	0.946202	0.404444	29.9989	33.9989	34.2023	34.1578	8.89166	4	62	9.67675e-06	4.57064	4.79207	4.49274	4.27018	4.84464	-0.100355	0.848771	-0.434286	-1.38824	1.07411	-0.274001	-0.0525709	-0.351907	-0.574464	-1.20916	-1.03711	-1.27625	-1.48912	-2.86913	-0.52016	-2.63053	-5.20084	0.00562084	0.604805	0.01074	2.36604e-06	2.2502	0.218385	1.969	5.62598	0.0122434	0.712896	0.021974
AGER	45	0.0182689	0.199868	0.218137	0.282093	0.0837494	0.916251	0.366351	92.5985	96.5985	96.8019	96.7574	6.66761	4	62	0.000157347	4.56726	4.90241	5.61904	4.98942	4.93076	-1.13631	-0.259859	1.61423	-0.0323249	-0.185728	-0.363492	-0.0283467	0.688279	0.0586593	-1.28654	-1.01984	1.61136	1.0415	-2.3159	-0.170205	3.12963	0.323079	0.023885	0.865403	0.00266795	0.747722	1.62187	0.0627817	2.57382	0.12626	0.0455234	0.897455	0.00624889
IRAK1	46	0.030524	0.193734	0.224258	0.398171	0.136111	0.863889	0.571818	92.542	96.542	96.7454	96.7009	16.1478	4	62	4.12459e-09	6.28426	6.03559	7.3405	6.86135	5.94163	-0.350935	-0.769645	1.42764	0.620813	-0.927868	0.342626	0.0939648	1.39887	0.919721	1.26806	1.0673	2.63695	1.89175	2.21221	0.569921	6.4433	5.13235	0.0306451	0.570791	1.9573e-08	3.05576e-06	1.51364	0.243523	7.70834	5.51488	0.0567229	0.689155	1.1461e-07
IRAK3	47	0.0819378	0.543757	0.625695	1.65176	0.130955	0.869045	0.709916	156.354	160.354	160.558	160.513	33.2591	4	62	8.23851e-15	9.11288	8.48315	10.5714	10.9391	7.97921	-0.235427	-0.722684	0.893134	1.17759	-1.11261	1.13367	0.50394	2.59222	2.95984	2.19416	1.41808	6.03024	7.7804	4.36992	1.82525	7.1285	9.86091	4.82318e-05	0.072781	1.28812e-09	2.5563e-14	4.31667	1.13798	8.89004	13.5924	0.000148852	0.121499	9.58313e-09
TNFRSF18	48	0.0100307	0.0844671	0.0944978	0.119101	0.106147	0.893853	0.370608	40.0357	44.0357	44.2391	44.1946	6.28315	4	62	0.000260615	4.5628	4.80427	4.59272	4.33309	4.84039	-0.310976	0.865031	-0.165255	-1.42974	1.04094	-0.277589	-0.0361191	-0.247668	-0.507305	-1.21217	-1.02535	-1.18729	-1.42139	-2.71756	-0.332726	-1.73009	-4.29289	0.00851479	0.740464	0.0885888	6.30729e-05	2.06983	0.130496	1.05262	4.20016	0.0179136	0.811901	0.143834
THBS1	49	0.327187	0.490409	0.817596	0.923267	0.400182	0.599818	0.548517	157.356	161.356	161.559	161.515	6.4402	4	62	0.000211897	9.93562	9.36562	10.6961	10.1679	9.29934	0.0734298	-0.906665	1.38106	0.472809	-1.02063	0.636288	0.0662824	1.39678	0.86856	1.55432	1.04702	2.63314	1.82584	2.57024	0.249839	4.0203	3.03065	0.0125792	0.803538	0.000160081	0.00355728	1.90035	0.0949938	3.79566	2.44888	0.0253892	0.851421	0.000457373
ZNF205	50	0.0367263	0.374619	0.411346	0.593259	0.0892832	0.910717	0.436417	131.763	135.763	135.966	135.922	9.22812	4	62	6.46621e-06	4.66938	4.77435	6.29532	5.25434	4.8694	-0.756215	-0.598466	1.68739	0.12291	-0.455618	-0.200013	-0.0950493	1.42593	0.384945	-1.14871	-1.0681	2.68687	1.30581	-0.930539	-0.416573	4.7343	1.54814	0.355701	0.67843	1.31879e-05	0.126679	0.448914	0.168495	4.87982	0.897297	0.472428	0.768481	4.39597e-05
SPP1	51	0	0.0863454	0.0863454	0.115869	0	1	0.299962	36.6827	38.6827	38.7493	38.7621	6.64165	4	62	0.000162764	4.67195	4.77965	4.49324	4.30364	4.84869	0.236871	0.722602	-0.569169	-1.4243	1.034	-0.176738	-0.0690421	-0.355452	-0.545051	-1.13033	-1.04902	-1.27939	-1.45907	-1.72603	-0.642033	-2.47905	-4.60371	0.089322	0.523218	0.0159067	2.1095e-05	1.04904	0.281317	1.79842	4.67582	0.144796	0.646415	0.0314258
FOXP3	52	0.0369612	0.342758	0.379719	0.517444	0.0973383	0.902662	0.410451	126.554	130.554	130.758	130.713	7.98786	4	62	2.92711e-05	4.66828	4.79916	6.12684	5.20067	4.85106	-0.779339	-0.558054	1.68684	0.120838	-0.470287	-0.182781	-0.0519076	1.27578	0.349606	-1.13507	-1.03663	2.42129	1.27421	-0.888659	-0.237605	4.42621	1.46927	0.377621	0.812971	3.95904e-05	0.146815	0.422944	0.0899248	4.40241	0.83323	0.49704	0.858299	0.000123295
TNFAIP3	53	0	0.725918	0.725918	2.56722	0	1	0.734373	168.686	170.686	170.752	170.765	42.8524	4	62	3.37604e-17	7.74547	6.73564	9.10991	10.4986	6.72653	-0.256302	-0.87586	0.580818	1.43279	-0.881445	1.01894	0.00910325	2.38338	3.77203	2.02642	1.00633	5.21756	13.6613	3.43196	0.0291955	5.73289	10.9881	0.00107229	0.976802	3.13249e-07	3.45181e-16	2.96969	0.0101933	6.50411	15.462	0.00267204	0.981523	1.48661e-06
ICAM4	54	0.267154	0.725113	0.992267	1.43182	0.269236	0.730764	0.564441	178.285	182.285	182.489	182.444	12.6646	4	62	1.3608e-07	5.83828	5.5033	7.5237	7.23565	5.55572	-0.50788	-0.85293	1.22823	0.931516	-0.798936	0.282558	-0.0524178	1.96798	1.67993	1.21635	-1.037	3.9122	3.20412	0.940089	-0.163098	4.66751	4.82897	0.35082	0.870972	1.67801e-05	9.35166e-06	0.454916	0.059996	4.77521	5.02911	0.467558	0.901573	5.52166e-05
GP1BB	55	0.308625	0.363462	0.672087	0.862888	0.459204	0.540796	0.643283	140.232	144.232	144.435	144.39	12.8421	4	62	1.12799e-07	6.41853	6.41212	7.89981	7.39767	6.29498	-0.646041	-0.654925	1.40713	0.71113	-0.817297	0.123554	0.117145	1.60483	1.1027	1.08942	1.08459	3.0416	2.14756	0.579461	0.512313	5.36219	4.46695	0.564378	0.610252	1.28951e-06	3.42968e-05	0.24843	0.214491	5.88957	4.46475	0.682751	0.71767	5.37443e-06
MCL1	56	0.0286273	0.298131	0.326758	0.591875	0.0876101	0.91239	0.550166	117.539	121.539	121.743	121.698	16.6618	4	62	2.53939e-09	12.4493	11.5191	11.7668	12.5364	11.1746	0.948306	-0.62673	-0.20733	1.09579	-1.21004	1.2747	0.344495	0.592189	1.3618	2.41948	1.26971	1.50753	2.57006	6.64833	1.69281	2.20422	6.13985	8.70019e-09	0.0955117	0.03123	6.4495e-08	8.06047	1.01994	1.50543	7.19047	5.47988e-08	0.153777	0.0576669
IL9	57	0	0.101201	0.101201	0.123303	0	1	0.228987	46.5256	48.5256	48.5922	48.605	4.60342	4	62	0.00255459	4.58165	4.77965	4.49324	4.3797	4.84869	-0.178618	0.833724	-0.630663	-1.21117	1.18673	-0.267039	-0.0690421	-0.355452	-0.46899	-1.20334	-1.04902	-1.27939	-1.38414	-2.40892	-0.59304	-2.28988	-3.65898	0.0189846	0.555312	0.025444	0.000524574	1.7216	0.255463	1.59441	3.28019	0.0369378	0.675497	0.0480488
IDO2	58	0.117545	0.616345	0.73389	0.901776	0.160167	0.839833	0.401881	165.075	169.075	169.279	169.234	6.02532	4	62	0.000366951	5.80867	5.25216	4.85157	6.29082	5.0527	0.606276	-0.337536	-1.01691	1.42397	-0.675796	0.755966	0.199453	-0.201138	1.23811	1.68876	1.14826	-1.1496	2.3589	2.73442	0.676969	-0.518932	3.87028	0.00813592	0.500943	0.605655	0.000263865	2.08959	0.300211	0.217775	3.57862	0.0171988	0.623766	0.71308
CXCL6	59	0.0369259	0.464549	0.501475	0.619205	0.0736347	0.926365	0.326368	144.491	148.491	148.694	148.65	5.28489	4	62	0.000996847	4.71766	4.76552	6.07651	5.18188	4.8685	-0.717746	-0.632798	1.69429	0.106266	-0.450009	-0.150833	-0.102977	1.20802	0.313384	-1.11021	-1.07399	2.3102	1.24262	-0.630708	-0.406131	3.60533	1.13286	0.53055	0.686045	0.00062254	0.261634	0.275274	0.163648	3.20583	0.582305	0.652593	0.773433	0.00161535
TRAF3	60	0.00441853	0.193506	0.197925	0.534197	0.0223243	0.977676	0.665716	87.9034	91.9034	92.1068	92.0623	29.6402	4	62	8.67606e-14	6.61162	6.63061	7.69349	8.15713	6.87418	-0.836269	-0.808967	0.718821	1.38527	-0.458856	-0.262565	-0.243571	0.819305	1.28295	-1.19961	-1.18392	1.76456	2.43336	-1.7081	-1.50304	3.80587	7.21739	0.0926201	0.137905	0.00032604	9.034e-10	1.03329	0.860418	3.48673	9.04412	0.149457	0.211108	0.000891833
CR2	61	0.096976	0.33012	0.427096	0.584651	0.227059	0.772941	0.511681	128.348	132.348	132.552	132.507	9.94952	4	62	2.76779e-06	4.95334	5.53729	4.8002	4.56183	5.80142	-0.341633	0.782449	-0.636427	-1.09528	1.29089	-0.848077	-0.264128	-1.00122	-1.23959	-1.8001	-1.20091	-2.00169	-2.36131	-4.18486	-1.22019	-3.5226	-5.28522	9.15467e-05	0.227012	0.000808459	1.72381e-06	4.03836	0.643951	3.09234	5.76351	0.000270859	0.326167	0.00205789
SHC1	62	0.0333685	0.115502	0.14887	0.420141	0.224145	0.775855	0.762147	63.1559	67.1559	67.3592	67.3147	39.3978	4	62	2.19004e-16	7.33805	6.89612	8.31493	7.95979	6.69598	-0.149512	-0.791507	1.26959	0.753683	-1.08225	0.642076	0.200142	1.61895	1.26381	1.56057	1.14881	3.07152	2.4013	5.35672	1.56335	9.63031	9.11042	1.31644e-06	0.123061	6.26537e-14	4.80793e-13	5.8806	0.90988	13.2031	12.318	5.47184e-06	0.191331	1.51948e-12
CCL8	63	0.0580539	0.812074	0.870128	1.77523	0.0667188	0.933281	0.588054	178.838	182.838	183.042	182.997	19.0394	4	62	2.95068e-10	5.8429	4.90533	6.49503	7.55466	4.83149	-0.0726187	-0.893114	0.498077	1.42539	-0.957734	1.01141	0.0738402	1.66354	2.72316	2.01588	1.05251	3.16792	6.6032	3.20008	0.220487	3.75694	7.4489	0.00216677	0.826216	0.000382427	3.5824e-10	2.66419	0.0829064	3.41745	9.44583	0.00513753	0.868217	0.00103413
C6	64	0	0.156722	0.156722	0.16062	0	1	0.0834007	73.6421	75.6421	75.7088	75.7216	1.41033	4	62	0.241049	4.58165	4.77965	4.66088	4.56823	4.84869	-0.862477	0.745991	-0.218874	-0.971507	1.30687	-0.267039	-0.0690421	-0.187814	-0.280461	-1.20334	-1.04902	-1.13904	-1.21458	-1.93575	-0.476553	-0.972269	-1.75832	0.0574614	0.635355	0.334695	0.083629	1.24062	0.196983	0.475351	1.07764	0.0987067	0.737894	0.44996
CD80	65	0.185755	0.472169	0.657924	0.883035	0.282335	0.717665	0.540804	152.034	156.034	156.237	156.193	10.0617	4	62	2.43037e-06	6.11249	5.68768	6.08985	7.33067	5.95995	-0.194775	-0.863994	-0.230441	1.72429	-0.435082	0.152542	-0.272265	0.129902	1.37073	1.11153	-1.2077	1.09422	2.58601	0.628812	-1.04932	0.381704	4.88171	0.531782	0.298106	0.703986	7.71279e-06	0.274266	0.52563	0.152436	5.11279	0.653736	0.41118	0.786462
IKZF3	66	0.0902372	0.245007	0.335244	0.424252	0.269169	0.730831	0.503309	111.011	115.011	115.214	115.17	9.34352	4	62	5.63735e-06	6.91721	7.55493	7.15844	6.8289	7.77023	-0.80928	0.760667	-0.215408	-1.0267	1.29072	-0.853018	-0.215306	-0.611787	-0.941332	-1.80628	-1.16095	-1.52815	-1.9203	-4.8824	-1.1525	-2.4962	-4.655	7.6933e-06	0.253541	0.0152261	1.75519e-05	5.11389	0.595953	1.81741	4.75568	2.68655e-05	0.359202	0.0302363
IL7	67	0	0.319098	0.319098	0.44942	0	1	0.33301	117.725	119.725	119.792	119.805	7.73874	4	62	3.99638e-05	5.49771	6.14892	5.45461	5.11068	6.04363	-0.352836	1.145	-0.451967	-1.24302	0.902827	-0.545924	0.10529	-0.589023	-0.932951	-1.45996	1.07571	-1.50423	-1.90918	-2.77338	0.509317	-2.13695	-4.09909	0.00731884	0.612338	0.0365546	0.000122667	2.13556	0.213009	1.43706	3.91127	0.0155892	0.719573	0.0663454
OASL	68	0.149133	1.62933	1.77846	7.24927	0.083855	0.916145	0.799002	222.695	226.695	226.898	226.854	57.6605	4	62	3.2591e-20	10.2171	6.20321	10.4323	10.9919	5.20971	0.597261	-0.895227	0.677267	0.885343	-1.26464	5.0074	0.993508	5.22257	5.78216	32.1646	1.99102	37.3379	55.0307	11.1739	2.08931	8.31721	11.1539	1.72076e-16	0.0407899	1.11612e-11	1.85376e-16	15.7643	1.38945	10.9523	15.7319	1.05999e-14	0.0730848	1.38614e-10
IRF4	69	0.037661	0.157501	0.195162	0.385779	0.192973	0.807027	0.644995	81.4855	85.4855	85.6889	85.6444	22.5399	4	62	1.58472e-11	6.71064	7.04771	6.10922	5.88016	7.16862	0.223965	0.816686	-0.833568	-1.23637	1.02928	-0.457979	-0.120903	-1.05939	-1.28846	-1.37362	-1.08741	-2.08405	-2.44267	-3.27419	-0.810064	-5.40108	-7.95987	0.00173583	0.421002	1.11304e-06	4.64544e-11	2.76049	0.375716	5.95349	10.333	0.00417685	0.543684	4.69611e-06
PTGER1	70	0.00422296	0.0742741	0.078497	0.112987	0.0537977	0.946202	0.404444	29.9989	33.9989	34.2023	34.1578	8.89166	4	62	9.67675e-06	4.57064	4.79207	4.49274	4.27018	4.84464	-0.100355	0.848771	-0.434286	-1.38824	1.07411	-0.274001	-0.0525709	-0.351907	-0.574464	-1.20916	-1.03711	-1.27625	-1.48912	-2.86913	-0.52016	-2.63053	-5.20084	0.00562084	0.604805	0.01074	2.36604e-06	2.2502	0.218385	1.969	5.62598	0.0122434	0.712896	0.021974
C3AR1	71	0.00674583	1.07081	1.07756	4.63988	0.00626029	0.99374	0.784393	193.136	197.136	197.34	197.295	55.8976	4	62	6.89757e-20	8.06283	6.48861	9.60582	11.7887	6.52072	-0.191608	-0.892256	0.49514	1.46669	-0.877966	1.54211	-0.0321061	3.0851	5.26797	2.9122	-1.0225	8.48606	38.5317	4.27284	-0.0846051	6.10442	12.6235	6.76107e-05	0.932848	7.40782e-08	8.69472e-19	4.16998	0.0301891	7.13031	18.0607	0.000203559	0.950231	3.88546e-07
PIGR	72	0.00422296	0.0742741	0.078497	0.112987	0.0537977	0.946202	0.404444	29.9989	33.9989	34.2023	34.1578	8.89166	4	62	9.67675e-06	4.57064	4.79207	4.49274	4.27018	4.84464	-0.100355	0.848771	-0.434286	-1.38824	1.07411	-0.274001	-0.0525709	-0.351907	-0.574464	-1.20916	-1.03711	-1.27625	-1.48912	-2.86913	-0.52016	-2.63053	-5.20084	0.00562084	0.604805	0.01074	2.36604e-06	2.2502	0.218385	1.969	5.62598	0.0122434	0.712896	0.021974
CUL9	73	0.0544939	0.260269	0.314763	0.362067	0.173127	0.826873	0.372611	112.029	116.029	116.232	116.188	4.1406	4	62	0.00489315	5.32185	5.60046	6.28935	5.61116	5.51336	-0.94211	-0.182155	1.69696	-0.152971	-0.419725	-0.191509	0.0870946	0.775989	0.0977936	-1.14196	1.06223	1.71236	1.07014	-1.0656	0.454501	3.07949	0.470237	0.290736	0.651055	0.00308865	0.639835	0.536502	0.186382	2.51023	0.193932	0.403	0.749909	0.00714728
ARG1	74	0.0123268	0.0859681	0.0982949	0.119804	0.125407	0.874593	0.366756	41.8048	45.8048	46.0082	45.9637	5.55548	4	62	0.000689881	4.5608	4.80135	4.58174	4.36442	4.83932	-0.353909	0.884875	-0.246093	-1.36526	1.08039	-0.278513	-0.037965	-0.257577	-0.474898	-1.21294	-1.02666	-1.19547	-1.38982	-2.70057	-0.346001	-1.78187	-3.97998	0.00891298	0.730513	0.0796682	0.000183264	2.04998	0.136372	1.09871	3.73692	0.0186621	0.803565	0.131218
CASP3	75	0.173873	0.153056	0.32693	0.418284	0.531837	0.468163	0.691243	88.4177	92.4177	92.621	92.5765	9.64491	4	62	3.9501e-06	9.14633	9.39324	8.55016	8.5778	8.97707	0.596186	1.27328	-1.03865	-0.962861	0.132046	0.169255	0.416166	-0.42691	-0.399273	1.12448	1.33438	-1.34435	-1.31884	1.22268	2.80149	-2.19678	-2.49116	0.22608	0.00677701	0.0317832	0.0154236	0.645739	2.16896	1.4978	1.81182	0.325152	0.0145154	0.058618
FAS	76	0.0617288	0.646417	0.708146	2.00935	0.0871696	0.91283	0.712657	165.505	169.505	169.708	169.664	35.4459	4	62	2.15482e-15	9.75658	7.94683	9.53289	10.8281	7.6406	0.463493	-0.89912	0.295069	1.27024	-1.12968	2.11598	0.306221	1.89229	3.18746	4.33484	1.23646	3.71223	9.11006	7.49503	1.02195	4.78343	9.75994	2.97907e-10	0.310776	1.10368e-05	3.78291e-14	9.52592	0.507553	4.95716	13.4222	2.58076e-09	0.424286	3.72735e-05
TAP2	77	0.0934992	0.31795	0.411449	1.29426	0.227244	0.772756	0.787551	126.025	130.025	130.228	130.184	49.6668	4	62	1.13989e-18	7.26327	5.97666	8.1368	8.00401	5.50668	0.24058	-0.84252	0.975944	0.864159	-1.23816	1.75659	0.46998	2.63012	2.49733	3.37898	1.38509	6.19078	5.6464	8.83224	2.21231	9.42897	10.8497	1.44249e-12	0.0306376	1.37582e-13	5.8121e-16	11.8409	1.51375	12.8614	15.2357	2.21038e-11	0.0567229	2.96331e-12
MAPK14	78	0.0873139	0.667042	0.754356	1.22625	0.115746	0.884254	0.518649	168.5	172.5	172.704	172.659	13.879	4	62	3.85026e-08	8.97586	7.86551	8.4777	9.4824	7.40942	0.641638	-0.693315	0.0427076	1.25063	-1.24166	1.56644	0.456089	1.06828	2.07298	2.96174	1.37182	2.09693	4.20754	5.45484	1.4936	2.65425	6.23948	9.07687e-07	0.140351	0.0100861	4.36519e-08	6.04206	0.852784	1.99628	7.36	3.88828e-06	0.214319	0.0209475
AKT3	79	0.053822	0.116778	0.1706	0.447387	0.315487	0.684513	0.776606	66.2741	70.2741	70.4775	70.433	39.5607	4	62	2.00012e-16	9.2278	9.43654	7.76899	8.70716	9.6843	0.346199	0.621128	-1.57524	-0.339548	0.947459	-0.456494	-0.24776	-1.91531	-0.977134	-1.3722	-1.18736	-3.77194	-1.96855	-3.78216	-1.91796	-11.3101	-6.99399	0.000352294	0.0597252	1.03535e-16	2.20229e-09	3.4531	1.22384	15.9849	8.65713	0.000956847	0.10214	7.77778e-15
PSMB9	80	0.0742418	0.402878	0.477119	1.00581	0.155604	0.844396	0.649127	138.57	142.57	142.773	142.729	24.7263	4	62	2.90195e-12	11.0516	9.68986	10.6281	11.0878	9.2189	0.851981	-0.767562	0.348238	0.895001	-1.32766	1.83274	0.470954	1.40917	1.86891	3.56212	1.38603	2.65584	3.65256	8.20064	1.97777	4.49755	7.22704	1.77647e-11	0.0524038	3.0779e-05	8.69253e-10	10.7504	1.28064	4.51175	9.06085	2.06472e-10	0.0911884	9.8136e-05
C3	81	0.0099641	0.391003	0.400967	1.05908	0.0248502	0.97515	0.659887	131.64	135.64	135.844	135.799	28.8531	4	62	1.48353e-13	4.80048	4.79147	7.07365	6.44578	4.84433	-0.725516	-0.733785	1.36036	0.784223	-0.685279	-0.0438504	-0.0528613	2.22932	1.60145	-1.03086	-1.03732	4.68912	3.03448	-0.200629	-0.229333	7.28307	6.33606	0.841646	0.819365	6.94957e-10	2.98658e-08	0.0748707	0.0865227	9.15804	7.52483	0.878894	0.863374	5.59633e-09
CXCL12	82	0.0504058	0.143477	0.193883	0.269718	0.259981	0.740019	0.54198	77.5883	81.5883	81.7917	81.7472	9.99601	4	62	2.6224e-06	4.6278	4.96516	4.94322	5.53661	4.9691	-1.1587	-0.131584	-0.198379	1.60824	-0.119576	-0.341306	-0.00394406	-0.0258833	0.56751	-1.2669	-1.00274	-1.0181	1.48196	-2.55317	-0.0275982	-0.138031	3.66791	0.0131493	0.978071	0.890663	0.000509768	1.8811	0.00962951	0.0502865	3.29263	0.0264878	0.982217	0.916553
SMAD5	83	0.0369739	0.279202	0.316176	0.401156	0.116941	0.883059	0.384335	114.545	118.545	118.748	118.704	6.35815	4	62	0.000236058	4.78512	5.15919	5.99596	5.20527	5.27447	-1.13146	-0.283076	1.61472	-0.178559	-0.0216208	-0.489349	-0.11528	0.721492	-0.0691968	-1.40381	-1.08319	1.64889	-1.04913	-2.6338	-0.583457	2.77065	-0.32191	0.0106476	0.561703	0.00737372	0.748604	1.97275	0.250494	2.13231	0.125748	0.021974	0.680852	0.0156953
MAP3K7	84	0	0.179343	0.179343	0.183278	0	1	0.0807745	82.0011	84.0011	84.0678	84.0806	1.36202	4	62	0.257424	5.46532	5.72198	5.33782	5.64655	5.57666	-0.55679	1.13744	-1.39838	0.639524	0.178201	-0.111347	0.14532	-0.238844	0.0698881	-1.08024	1.10598	-1.18005	1.04964	-0.754531	0.937666	-1.15584	0.409592	0.453387	0.352055	0.252183	0.683517	0.343531	0.45339	0.598284	0.165251	0.577515	0.468375	0.357728
C1QB	85	0.031446	0.452786	0.484232	0.610954	0.0649399	0.93506	0.332076	142.546	146.546	146.749	146.705	6.09234	4	62	0.000335623	5.33725	4.84974	6.06137	5.87229	5.05257	-0.187262	-1.12466	1.20508	0.841508	-0.734663	0.284687	-0.202825	1.0088	0.819718	1.21815	-1.15095	2.01223	1.76506	1.20643	-0.811305	3.05151	3.00322	0.232235	0.420294	0.00334959	0.0038487	0.634073	0.376446	2.47501	2.41469	0.332535	0.543226	0.00767043
ITGAX	86	0.321896	0.402989	0.724885	0.744532	0.444065	0.555935	0.541218	146.26	150.26	150.464	150.419	3.45797	4	62	0.0129374	6.26019	6.03209	7.02594	6.18919	5.91251	-0.0545277	-0.577317	1.70049	-0.217269	-0.85138	0.347683	0.119579	1.11344	0.276676	1.27252	1.08642	2.1636	1.2114	1.54875	0.496786	3.53365	1.06454	0.126532	0.621097	0.000780863	0.29121	0.897799	0.206841	3.10743	0.535793	0.195937	0.725713	0.00199218
GFI1	87	0.0900753	0.611346	0.701421	1.20966	0.128418	0.871582	0.554366	163.532	167.532	167.736	167.691	15.0841	4	62	1.15302e-08	4.68557	4.97116	7.01919	6.17605	4.90759	-0.861463	-0.577484	1.45902	0.620625	-0.640694	-0.22202	0.0635672	2.1116	1.26846	-1.16637	1.04505	4.3217	2.40904	-0.807194	0.217187	5.47704	3.98592	0.422641	0.828776	8.34223e-07	0.000179655	0.374029	0.0815629	6.07872	3.74556	0.545571	0.869721	3.59358e-06
C2	88	0.0761603	0.391353	0.467513	0.850072	0.162905	0.837095	0.597355	137.001	141.001	141.205	141.16	16.9936	4	62	1.86373e-09	5.59565	4.95231	6.83937	6.22127	4.85562	-0.115097	-0.876918	1.35768	0.625754	-0.991417	0.740028	0.0966911	1.98375	1.36566	1.67021	1.06932	3.95519	2.57693	3.35896	0.411774	6.42226	5.35688	0.00134216	0.681925	2.12673e-08	1.31563e-06	2.8722	0.166263	7.67229	5.88087	0.00329917	0.770788	1.23825e-07
IL22RA2	89	0	0.321049	0.321049	0.334005	0	1	0.0970452	118.103	120.103	120.17	120.183	1.66586	4	62	0.169285	4.75622	4.77965	5.32148	5.09142	4.84869	-0.839743	-0.742954	1.49543	0.545003	-0.457732	-0.0924713	-0.0690421	0.472791	0.242727	-1.06619	-1.04902	1.38779	1.18323	-0.468339	-0.332959	1.71005	1.06322	0.641184	0.740288	0.092258	0.291807	0.193017	0.130599	1.035	0.534904	0.741776	0.811901	0.149084
IL16	90	0.0105237	0.137003	0.147526	0.378674	0.0713346	0.928665	0.674836	68.6919	72.6919	72.8953	72.8508	27.989	4	62	2.7023e-13	8.20419	8.8036	7.48937	7.47333	8.45607	0.201145	1.21534	-1.00834	-1.03547	0.627326	-0.25188	0.347525	-0.966703	-0.982738	-1.19076	1.27238	-1.95437	-1.97621	-1.93971	2.5247	-5.31356	-6.54265	0.0569681	0.0141528	1.54931e-06	1.32197e-08	1.24437	1.84916	5.80986	7.87878	0.0980234	0.0282873	6.29534e-06
CXCL10	91	0.099676	2.31576	2.41543	10.1589	0.0412663	0.958734	0.792109	242.705	246.705	246.908	246.863	56.6375	4	62	5.02433e-20	9.16834	5.80385	12.5825	12.016	4.98428	0.0740916	-0.894531	1.057	0.893923	-1.13048	4.18406	0.819564	7.59817	7.03174	18.1773	1.76487	193.766	130.847	7.85408	1.45569	10.1829	11.4131	7.08962e-11	0.150523	7.37338e-15	7.06344e-17	10.1494	0.822397	14.1323	16.151	7.15936e-10	0.227595	2.36563e-13
CD83	92	0.000606237	0.344233	0.344839	0.676328	0.00175803	0.998242	0.522634	122.526	126.526	126.729	126.685	16.8908	4	62	2.05062e-09	5.70217	5.84307	7.20993	7.12694	5.95878	-0.903987	-0.712744	1.14253	1.02988	-0.555678	-0.256616	-0.115718	1.25115	1.16815	-1.19467	-1.08351	2.3803	2.24724	-1.25483	-0.538614	4.36911	4.94025	0.21425	0.592082	4.83679e-05	6.22242e-06	0.66908	0.227618	4.31544	5.20604	0.310244	0.706006	0.000149122
HAMP	93	0.0256098	0.131596	0.157206	0.160561	0.162906	0.837094	0.283173	69.4293	73.4293	73.6327	73.5882	1.96128	4	62	0.11153	4.55998	4.8054	4.66036	4.54621	4.83349	-0.902857	0.92679	-0.154515	-1.00558	1.13616	-0.273501	-0.0280834	-0.173123	-0.287279	-1.20874	-1.01966	-1.1275	-1.22034	-2.14081	-0.206245	-0.966539	-1.94329	0.036229	0.837275	0.33753	0.0565242	1.44094	0.0771318	0.471688	1.24777	0.065871	0.875842	0.453178
RELB	94	0.00705538	0.424598	0.431653	1.49651	0.016345	0.983655	0.737043	136.321	140.321	140.524	140.48	42.5863	4	62	3.88373e-17	6.29629	5.72157	8.019	8.32759	5.59496	-0.38327	-0.827734	0.948999	1.18766	-0.925652	0.701333	0.126613	2.42404	2.73264	1.62601	1.09173	5.36671	6.64669	3.08211	0.528284	7.607	10.3852	0.00306515	0.599188	1.9039e-10	3.39395e-15	2.51355	0.222437	9.72036	14.4693	0.00709824	0.712273	1.71965e-09
CCL3	95	0.533625	1.68588	2.21951	5.99661	0.240425	0.759575	0.757326	229.816	233.816	234.02	233.975	41.2966	4	62	7.72852e-17	8.62004	6.29373	10.3027	12.0248	6.56193	-0.0574344	-1.00769	0.62991	1.33335	-0.898136	2.05812	-0.2682	3.7408	5.46289	4.16443	-1.2043	13.3688	44.1058	4.49294	-0.547937	5.82216	10.3041	3.1286e-05	0.585703	2.21959e-07	4.62992e-15	4.50465	0.232323	6.65373	14.3344	9.96492e-05	0.700841	1.06818e-06
HLA-A	96	1.55776	0.284038	1.8418	1.88329	0.845782	0.154218	0.873962	137.203	141.203	141.406	141.362	21.8715	4	62	2.71346e-11	12.5816	11.7158	12.7311	13.1256	11.4339	0.370004	-0.843347	0.579484	1.13235	-1.23849	1.14777	0.28196	1.29725	1.69175	2.21571	1.21585	2.45759	3.23048	6.07906	1.38917	4.89222	7.73759	8.17908e-08	0.169751	7.42177e-06	1.12948e-10	7.0873	0.770187	5.12949	9.94712	4.23387e-07	0.253557	2.59657e-05
ICOS	97	0.0712444	0.131992	0.203236	0.376051	0.35055	0.64945	0.700542	74.7521	78.7521	78.9555	78.911	24.3765	4	62	3.78456e-12	6.62664	6.73457	5.60396	5.81083	6.87737	0.509834	0.695767	-1.25186	-0.895502	0.941758	-0.250735	-0.1428	-1.27341	-1.06654	-1.18981	-1.10405	-2.41732	-2.09441	-1.95322	-1.03875	-7.0693	-7.17724	0.0553106	0.302956	1.63118e-09	1.06045e-09	1.25719	0.51862	8.7875	8.97451	0.0958137	0.416204	1.18213e-08
MAPKAPK5	98	0.0290631	0.0870136	0.116077	0.128017	0.250379	0.749621	0.414059	46.3218	50.3218	50.5252	50.4807	3.85855	4	62	0.00729937	6.54243	6.65358	6.54384	6.86254	6.86991	-0.931724	-0.250522	-0.923037	1.03004	1.07524	-0.327487	-0.216332	-0.326069	-0.00737607	-1.25483	-1.16178	-1.25359	-1.00513	-3.14628	-1.94458	-2.23333	-0.0612275	0.00254053	0.0563653	0.0291453	0.951375	2.59508	1.24899	1.53543	0.0216483	0.00595952	0.0972033	0.0543058
PSMB10	99	0.00836437	0.198512	0.206876	0.391106	0.0404318	0.959568	0.536893	90.3544	94.3544	94.5578	94.5133	16.2965	4	62	3.58189e-09	7.8535	7.1737	7.66744	7.9135	6.79609	0.775303	-0.639015	0.388202	0.900149	-1.42464	1.0574	0.377611	0.871343	1.11741	2.08118	1.29919	1.82936	2.16957	6.77988	2.29117	3.98876	6.19499	5.16226e-09	0.0253644	0.000177953	5.19729e-08	8.28716	1.59577	3.7497	7.28422	3.39738e-08	0.0479279	0.000506088
NCF4	100	0.127846	0.396522	0.524368	0.881435	0.243809	0.756191	0.611857	140.176	144.176	144.379	144.335	17.2867	4	62	1.4217e-09	8.53811	7.8133	8.86355	9.15573	7.31467	0.2647	-0.689613	0.693174	1.07787	-1.34613	1.22344	0.498634	1.54887	1.84106	2.33503	1.41287	2.92589	3.58272	5.50677	2.10024	4.97029	7.15985	7.44947e-07	0.0397828	5.57101e-06	1.13664e-09	6.12787	1.40031	5.25407	8.94438	3.2316e-06	0.0714883	2.00218e-05
CD164	101	0.00846092	0.348156	0.356616	0.906117	0.0237256	0.976274	0.645765	124.388	128.388	128.592	128.547	27.2639	4	62	4.51017e-13	10.5632	9.5871	10.3884	11.4002	9.21563	0.387041	-0.749962	0.183508	1.3621	-1.18269	1.34752	0.371472	1.1728	2.18456	2.54475	1.29367	2.25449	4.54588	6.53447	1.70836	4.06093	9.16066	1.36547e-08	0.0925726	0.00013959	3.94492e-13	7.86472	1.03352	3.85514	12.404	8.29517e-08	0.149457	0.000401812
CD55	102	0.0847249	0.623471	0.708196	1.34783	0.119635	0.880365	0.591135	164.448	168.448	168.651	168.607	18.9832	4	62	3.09969e-10	10.6084	9.6219	11.1819	11.829	9.49049	0.0618543	-0.921851	0.633783	1.2791	-1.05289	1.11787	0.131407	1.6914	2.33853	2.17026	1.09536	3.22971	5.05788	4.02586	0.444947	4.34602	7.27932	0.000157113	0.657907	5.243e-05	7.05446e-10	3.80379	0.181835	4.28042	9.15154	0.00044931	0.753292	0.000160681
TRADD	103	0.0351681	0.240961	0.276129	0.2756	0.127361	0.872639	0.228834	105.772	109.772	109.976	109.931	1.57917	4	62	0.191033	6.3058	6.0783	6.49589	6.40303	6.07632	0.178664	-1.01931	1.17968	0.690709	-1.02974	0.229477	0.00197925	0.419571	0.326715	1.17241	1.00137	1.33753	1.25415	1.32896	0.0107724	1.73353	1.63535	0.188731	0.99144	0.0879728	0.107044	0.724157	0.00373374	1.05565	0.970438	0.278205	0.992406	0.142909
IGF2R	104	0.107836	0.297381	0.405217	0.444804	0.266118	0.733882	0.42478	122.941	126.941	127.144	127.1	4.42857	4	62	0.00326239	10.5395	10.2956	10.1182	10.2618	9.74328	1.18756	0.354798	-0.250924	0.239429	-1.53086	0.79624	0.55232	0.374901	0.518528	1.73657	1.46644	1.29675	1.43249	4.13688	2.68385	1.38853	2.32758	0.000107868	0.00932109	0.169946	0.0232135	3.96711	2.03053	0.76969	1.63426	0.000314915	0.0194505	0.253724
IL23A	105	0.0381952	0.573615	0.61181	0.957545	0.0624298	0.93757	0.459503	157.107	161.107	161.31	161.266	11.1453	4	62	7.09794e-07	4.67591	4.77679	6.71732	5.73136	4.91994	-0.797248	-0.680415	1.56711	0.425173	-0.514618	-0.244025	-0.143151	1.79738	0.811424	-1.18429	-1.10431	3.47589	1.75494	-0.918921	-0.508937	4.83134	2.64171	0.361698	0.612603	9.27093e-06	0.0104271	0.441653	0.212821	5.03288	1.98183	0.478741	0.71961	3.19044e-05
PTPRC	106	0.0132928	0.162044	0.175337	0.220353	0.0758131	0.924187	0.34029	79.2796	83.2796	83.4829	83.4384	6.13452	4	62	0.000317327	12.8816	12.5305	12.3848	13.0132	12.3975	0.831421	-0.3845	-0.88894	1.28708	-0.845056	0.484126	0.132997	-0.0126725	0.615708	1.39874	1.09657	-1.00882	1.53231	3.42715	0.887842	-0.0640279	3.76802	0.00108837	0.378057	0.949154	0.000368891	2.96322	0.422443	0.0226633	3.4331	0.00270554	0.497401	0.961643
LILRB1	107	0.368866	0.318905	0.687771	1.08535	0.536321	0.463679	0.752119	134.045	138.045	138.248	138.204	27.2401	4	62	4.5872e-13	8.03007	7.72309	5.70897	6.54854	7.6556	0.920657	0.605518	-1.46215	-0.600258	0.536233	0.374469	0.0674909	-1.94663	-1.10706	1.29636	1.04789	-3.85473	-2.15406	1.874	0.314728	-6.93928	-4.78502	0.0656446	0.754025	2.73848e-09	1.09731e-05	1.1828	0.122614	8.56249	4.95967	0.110665	0.81824	1.8954e-08
CSF1	108	0.0331944	0.44694	0.480134	1.00999	0.0691357	0.930864	0.601915	141.913	145.913	146.116	146.072	21.0497	4	62	5.32464e-11	6.96119	5.64252	6.8179	7.11682	5.3071	0.711906	-0.873626	0.539617	0.899026	-1.27692	1.65409	0.335419	1.5108	1.80972	3.14725	1.26174	2.84968	3.50573	7.05344	1.34956	4.5984	6.67161	1.73769e-09	0.182064	2.1499e-05	7.93332e-09	8.76003	0.739776	4.66758	8.10054	1.25049e-08	0.269465	6.91923e-05
CCL17	109	0	0.244115	0.244115	0.239162	0	1	0.0411503	101.118	103.118	103.185	103.198	0.665203	4	62	0.618549	4.94427	4.77965	4.66465	4.98673	4.84869	0.769993	-0.504326	-1.39452	1.09872	0.0301311	0.0955766	-0.0690421	-0.184038	0.138042	1.06849	-1.04902	-1.13606	1.10041	0.555129	-0.381839	-0.763371	0.693432	0.580804	0.703887	0.448137	0.490628	0.235971	0.152497	0.348589	0.309248	0.697146	0.786462	0.572248
SELL	110	0.0834757	0.642222	0.725697	1.56021	0.115028	0.884972	0.635683	166.124	170.124	170.327	170.283	23.6862	4	62	6.43352e-12	14.018	12.6159	13.0288	14.834	12.1653	0.632971	-0.66154	-0.280287	1.38639	-1.07753	1.85264	0.450559	0.863493	2.66866	3.6116	1.36657	1.81944	6.35839	6.57513	1.50385	2.18658	8.18645	1.16257e-08	0.137698	0.032556	1.87994e-11	7.93458	0.861071	1.48737	10.7259	7.14715e-08	0.210895	0.0599
HLA-DOB	111	0.00955086	0.150659	0.16021	0.19074	0.0596147	0.940385	0.286406	74.098	78.098	78.3014	78.2568	4.38243	4	62	0.00348059	6.44393	6.73653	6.75965	6.51536	6.97178	-1.14696	0.242565	0.352394	-0.807774	1.35977	-0.527845	-0.235252	-0.212125	-0.456423	-1.44177	-1.17711	-1.15839	-1.37214	-3.87924	-1.63273	-1.11282	-2.90006	0.000256175	0.107594	0.270081	0.00515541	3.59146	0.968212	0.568506	2.28774	0.000710828	0.170167	0.377941
CD7	112	0.0974219	0.0636005	0.161022	0.341551	0.605021	0.394979	0.843344	35.8818	39.8818	40.0852	40.0407	51.066	4	62	5.93719e-19	8.15744	8.40974	7.32849	7.45461	8.61443	0.286532	0.726015	-1.1574	-0.937707	1.08256	-0.456991	-0.204688	-1.28594	-1.15981	-1.37268	-1.15244	-2.43841	-2.23429	-5.1193	-2.13556	-10.2601	-11.221	3.20789e-06	0.036673	5.48157e-15	1.44327e-16	5.49378	1.43565	14.2611	15.8407	1.20491e-05	0.066521	1.79609e-13
C1R	113	0	0.105787	0.105787	0.104633	0	1	0.0502481	49.273	51.273	51.3397	51.3525	0.820052	4	62	0.517324	4.6588	4.77965	4.69676	4.70488	4.84869	-1.03993	0.551785	-0.539967	-0.433044	1.46116	-0.18989	-0.0690421	-0.151931	-0.143813	-1.14068	-1.04902	-1.11106	-1.10482	-1.67542	-0.580044	-0.957314	-1.09742	0.0988879	0.563987	0.342127	0.276702	1.00486	0.248731	0.465813	0.557987	0.158633	0.682546	0.458352
PLA2G4A	114	0.0273367	0.187389	0.214726	0.53363	0.12731	0.87269	0.690266	90.1809	94.1809	94.3843	94.3398	30.332	4	62	5.45514e-14	6.10612	5.5824	6.92464	6.82647	5.26499	-0.0473107	-0.759244	1.06537	0.931918	-1.19073	0.841129	0.317412	1.65964	1.56147	1.79145	1.24609	3.15938	2.95155	5.5238	1.95902	7.77575	8.86294	6.9814e-07	0.0546118	9.69665e-11	1.27748e-12	6.15606	1.26271	10.0134	11.8936	3.0414e-06	0.0948164	9.51136e-10
CD44	115	0.0634929	0.298765	0.362258	0.678942	0.17527	0.82473	0.6161	120.647	124.647	124.851	124.806	19.8005	4	62	1.52627e-10	11.5983	11.0312	11.1577	12.7274	11.0365	0.122552	-0.666265	-0.490319	1.69304	-0.659005	0.561885	-0.00521966	0.121274	1.69095	1.4762	-1.00362	1.08769	3.2287	2.91793	-0.0254198	0.449164	7.58852	0.00490307	0.979802	0.654879	2.04991e-10	2.30953	0.00886178	0.183839	9.68826	0.0109114	0.982673	0.751233
BCL2	116	0.10771	0.212613	0.320323	0.561066	0.336254	0.663746	0.6763	103.951	107.951	108.154	108.11	22.6661	4	62	1.43315e-11	7.06387	7.72965	6.90267	6.55706	8.09929	-0.328288	0.729466	-0.584406	-1.1335	1.31672	-1.03541	-0.369635	-1.19662	-1.54223	-2.0497	-1.29203	-2.29202	-2.91244	-6.35617	-2.11935	-5.23519	-8.1787	2.75931e-08	0.0380725	2.08031e-06	1.93892e-11	7.5592	1.41939	5.68187	10.7124	1.57092e-07	0.0686956	8.19356e-06
USP9Y	117	0.0123076	0.0559131	0.0682207	0.0900002	0.180409	0.819591	0.458546	16.9004	20.9004	21.1037	21.0592	7.06626	4	62	9.39094e-05	9.11832	9.07716	8.55426	8.94248	8.99419	0.804995	0.621974	-1.70311	0.0231202	0.25302	0.124138	0.0829768	-0.439928	-0.0517038	1.08986	1.0592	-1.35654	-1.03649	1.48998	0.933798	-3.7658	-0.536279	0.141299	0.354031	0.000371572	0.593684	0.84986	0.450959	3.42996	0.226444	0.215446	0.470615	0.00100566
CMKLR1	118	0	0.475757	0.475757	0.612699	0	1	0.270567	142.489	144.489	144.555	144.568	5.74939	4	62	0.000531003	5.56073	5.17263	6.0657	5.98322	4.91124	0.0439784	-0.730858	1.05214	0.887462	-1.25273	0.649493	0.261393	1.15446	1.07198	1.56862	1.19864	2.22601	2.10231	2.70222	1.03553	3.43014	3.8573	0.00887344	0.304442	0.00107836	0.0002754	2.05191	0.516496	2.96724	3.56004	0.0186046	0.417861	0.00268283
GZMB	119	0.442961	0.256731	0.699692	0.972559	0.63308	0.36692	0.778139	123.171	127.171	127.374	127.33	26.4179	4	62	8.28748e-13	10.2878	10.8382	9.39473	9.18796	10.887	0.212175	0.904722	-0.911403	-1.17155	0.966058	-0.599199	-0.0487506	-1.49224	-1.69901	-1.51488	-1.03437	-2.81325	-3.24678	-3.3405	-0.253079	-5.92498	-8.18026	0.00141995	0.801044	1.49021e-07	1.92693e-11	2.84773	0.0963434	6.82675	10.7151	0.00347927	0.849885	7.30868e-07
KEAP1	120	0	0.232346	0.232346	0.390412	0	1	0.440938	98.0547	100.055	100.121	100.134	12.225	4	62	2.17605e-07	4.77841	4.87741	6.21796	5.31387	4.86679	-0.720442	-0.555519	1.67761	0.171556	-0.573203	-0.0883881	0.0106157	1.35116	0.447079	-1.06318	1.00739	2.55118	1.36328	-0.526218	0.060179	5.74467	2.30201	0.600614	0.952207	2.99349e-07	0.0247063	0.221404	0.0212688	6.52382	1.60719	0.712896	0.963165	1.42503e-06
CD3D	121	0.0564856	0.219198	0.275683	0.814423	0.204893	0.795107	0.766438	102.329	106.329	106.532	106.487	43.5395	4	62	2.3581e-17	8.61506	9.07781	7.11454	7.49662	9.39635	0.276758	0.742484	-1.23344	-0.848886	1.06308	-0.78129	-0.318545	-2.28182	-1.89973	-1.71867	-1.24707	-4.8629	-3.73142	-4.73342	-1.80796	-9.85783	-9.94529	1.32298e-05	0.0754629	2.58698e-14	1.84365e-14	4.87845	1.12227	13.5872	13.7343	4.40516e-05	0.125364	7.11419e-13
CYSLTR2	122	0.0418976	0.263998	0.305896	0.318916	0.136967	0.863033	0.271679	111.757	115.757	115.96	115.916	2.12958	4	62	0.0876978	5.25068	5.41055	5.35113	4.85943	5.34304	0.03477	0.755213	0.487438	-1.72842	0.451002	-0.0923622	0.0675045	0.00808503	-0.483616	-1.06611	1.0479	1.00562	-1.39824	-0.510846	0.350714	0.0319006	-2.31179	0.611273	0.726992	0.974654	0.0241256	0.213765	0.138471	0.0111496	1.61752	0.718596	0.801604	0.979743
LAG3	123	0.0340556	0.325917	0.359972	0.461193	0.0946063	0.905394	0.37046	123.329	127.329	127.532	127.488	6.3449	4	62	0.000240219	4.71868	4.77648	6.00791	5.00649	4.86339	-0.667901	-0.559421	1.75144	-0.127789	-0.396331	-0.144716	-0.0869085	1.14452	0.143103	-1.10551	-1.06209	2.21073	1.10428	-0.721635	-0.408099	4.07276	0.616843	0.473232	0.684607	0.000134118	0.539597	0.324926	0.164559	3.87251	0.267931	0.598022	0.772094	0.000387145
TNFSF13B	124	0.422447	0.885261	1.30771	2.69435	0.323044	0.676956	0.719002	192.054	196.054	196.258	196.213	30.4677	4	62	4.98475e-14	11.6858	9.40048	10.3061	12.1494	8.93389	0.851271	-0.782601	-0.135172	1.18268	-1.11618	2.75194	0.46659	1.37217	3.2155	6.73623	1.38184	2.5886	9.28884	8.28033	1.31156	2.94259	8.35831	1.29285e-11	0.194504	0.0045735	9.47545e-12	10.8885	0.711072	2.33975	11.0234	1.5739e-10	0.285001	0.0102389
CCL2	125	0	0.791845	0.791845	3.66887	0	1	0.797253	174.075	176.075	176.142	176.155	60.9498	4	62	8.42931e-21	5.45263	4.86771	7.6675	9.45656	4.84869	-0.494057	-0.781326	0.593704	1.47235	-0.790666	0.603945	0.0190171	2.81881	4.60787	1.51987	1.01327	7.0558	24.3841	1.94768	0.0583965	6.49188	12.852	0.0559853	0.953621	1.61576e-08	3.87013e-19	1.25193	0.0206244	7.79162	18.4123	0.0967105	0.963632	9.66317e-08
SLAMF6	126	0	0.456292	0.456292	0.511519	0	1	0.162029	139.899	141.899	141.965	141.978	2.99707	4	62	0.0251131	5.3207	5.72644	6.17738	5.28904	5.80637	-0.929007	0.169005	1.38936	-1.01469	0.385332	-0.485674	-0.0799371	0.371006	-0.517334	-1.40024	-1.05697	1.29325	-1.43131	-2.0633	-0.323363	1.1256	-1.90081	0.0432774	0.747509	0.264673	0.0619773	1.36374	0.126384	0.577291	1.20777	0.0770934	0.816372	0.371386
FEZ1	127	0.00422296	0.0742741	0.078497	0.112987	0.0537977	0.946202	0.404444	29.9989	33.9989	34.2023	34.1578	8.89166	4	62	9.67675e-06	4.57064	4.79207	4.49274	4.27018	4.84464	-0.100355	0.848771	-0.434286	-1.38824	1.07411	-0.274001	-0.0525709	-0.351907	-0.574464	-1.20916	-1.03711	-1.27625	-1.48912	-2.86913	-0.52016	-2.63053	-5.20084	0.00562084	0.604805	0.01074	2.36604e-06	2.2502	0.218385	1.969	5.62598	0.0122434	0.712896	0.021974
LAMP3	128	0	0.114321	0.114321	0.145683	0	1	0.262834	54.0835	56.0835	56.1501	56.1629	5.52648	4	62	0.00071753	4.58165	4.77965	4.71076	4.26962	4.84869	-0.247054	0.619911	0.318266	-1.61335	0.922223	-0.267039	-0.0690421	-0.137932	-0.579073	-1.20334	-1.04902	-1.10033	-1.49389	-2.26648	-0.557973	-0.836036	-4.25069	0.0269221	0.578872	0.406345	7.29916e-05	1.56989	0.237417	0.391105	4.13673	0.0505302	0.695176	0.526744
ITGA2B	129	0.40208	0.31318	0.71526	0.701075	0.562146	0.437854	0.623556	133.584	137.584	137.788	137.743	5.00864	4	62	0.00145634	7.6985	7.52846	8.40752	8.14305	7.43887	-0.34813	-0.756969	1.35672	0.720791	-0.972409	0.25963	0.089599	0.968656	0.704182	1.19717	1.06407	1.95702	1.62922	1.31094	0.421482	3.48381	3.07088	0.194713	0.674861	0.000912773	0.00316678	0.710604	0.170786	3.03964	2.49938	0.285172	0.766718	0.00229873
PSMD7	130	0.0143228	0.0697815	0.0841043	0.228808	0.170298	0.829702	0.733672	30.3285	34.3285	34.5319	34.4874	35.8417	4	62	1.70063e-15	7.35892	7.11674	8.24211	7.94458	7.08314	-0.366524	-0.833276	1.33562	0.76221	-0.898031	0.275781	0.0335991	1.15897	0.861443	1.21065	1.02356	2.23298	1.81685	2.96377	0.338683	8.88334	8.00039	0.00430704	0.735993	1.17842e-12	3.95103e-11	2.36582	0.133127	11.9287	10.4033	0.00968299	0.808437	1.90028e-11
MME	131	0	0.716962	0.716962	2.88311	0	1	0.766395	167.916	169.916	169.983	169.995	50.8513	4	62	6.55655e-19	7.6335	8.33126	4.58189	4.45811	7.48812	0.618616	0.998951	-1.04474	-1.11221	0.539378	0.145372	0.843139	-2.90624	-3.03002	1.10602	1.79395	-7.4966	-8.16819	0.492688	2.72091	-7.03408	-8.88151	0.623973	0.00843825	1.87709e-09	1.18696e-12	0.204834	2.07375	8.72651	11.9256	0.728245	0.0177891	1.3414e-08
MEF2A	132	0.0180549	0.310371	0.328426	0.616699	0.0549739	0.945026	0.544308	118.71	122.71	122.914	122.869	16.9724	4	62	1.9008e-09	7.84297	6.98777	7.92568	8.3475	6.85205	0.391099	-0.937342	0.519575	1.17482	-1.14816	0.990915	0.135714	1.07362	1.49545	1.98745	1.09864	2.10471	2.81952	5.07545	0.656755	3.92557	6.62247	3.77594e-06	0.513769	0.000219721	9.6389e-09	5.42297	0.289232	3.65813	8.01597	1.39447e-05	0.636528	0.000618029
CXCL2	133	0.0463283	0.325631	0.37196	0.475078	0.124552	0.875448	0.394979	124.346	128.346	128.55	128.505	6.6508	4	62	0.000160833	4.65729	4.78286	5.88743	5.29628	4.90883	-0.902346	-0.650134	1.56849	0.38111	-0.397116	-0.251535	-0.125968	0.978601	0.38745	-1.19047	-1.09124	1.97055	1.30808	-1.25322	-0.589922	3.47853	1.66846	0.21483	0.557387	0.000927925	0.100267	0.667905	0.253843	3.03249	0.998844	0.310939	0.677124	0.00233307
IRF3	134	0.0129327	0.0322451	0.0451778	0.06886	0.286262	0.713738	0.598036	-14.2692	-10.2692	-10.0658	-10.1103	15.577	4	62	7.13137e-09	8.6149	8.78366	8.64897	8.2731	8.76643	-0.0121974	0.80786	0.153321	-1.67312	0.724136	-0.151529	0.0172296	-0.117467	-0.493329	-1.11075	1.01201	-1.08483	-1.40769	-2.39011	0.254066	-1.32072	-6.72275	0.0198956	0.800286	0.191448	6.47673e-09	1.70124	0.096755	0.71795	8.18864	0.0385158	0.849885	0.28146
SERPING1	135	0.00142056	0.802013	0.803433	1.99247	0.00176811	0.998232	0.622478	174.966	178.966	179.17	179.125	25.4513	4	62	1.68566e-12	5.91863	4.77865	7.48945	7.58461	4.84931	-0.150329	-0.984254	0.998766	1.06838	-0.932564	1.06932	-0.0706598	2.64014	2.7353	2.09844	-1.0502	6.23391	6.65898	3.42567	-0.215468	6.04014	7.5786	0.00109338	0.83011	9.52063e-08	2.13284e-10	2.96123	0.0808646	7.02133	9.67104	0.00271362	0.870231	4.82006e-07
HLA-DQB1	136	0.205151	0.419661	0.624812	1.22132	0.32834	0.67166	0.706276	145.91	149.91	150.113	150.068	26.6522	4	62	6.99406e-13	6.3439	7.0894	5.49478	4.83288	7.07567	0.177923	0.929122	-0.677686	-1.34464	0.915286	-0.731768	0.0137306	-1.58088	-2.24278	-1.66067	1.00956	-2.99153	-4.73309	-3.19773	0.0560483	-4.92349	-8.46667	0.00218202	0.955484	6.6175e-06	6.15537e-12	2.66114	0.0197768	5.17931	11.2107	0.0051697	0.964882	2.3347e-05
ALOX12	137	0.00422296	0.0742741	0.078497	0.112987	0.0537977	0.946202	0.404444	29.9989	33.9989	34.2023	34.1578	8.89166	4	62	9.67675e-06	4.57064	4.79207	4.49274	4.27018	4.84464	-0.100355	0.848771	-0.434286	-1.38824	1.07411	-0.274001	-0.0525709	-0.351907	-0.574464	-1.20916	-1.03711	-1.27625	-1.48912	-2.86913	-0.52016	-2.63053	-5.20084	0.00562084	0.604805	0.01074	2.36604e-06	2.2502	0.218385	1.969	5.62598	0.0122434	0.712896	0.021974
EGR1	138	0.0147677	0.887078	0.901845	1.33143	0.016375	0.983625	0.382526	182.003	186.003	186.207	186.162	8.91975	4	62	9.35471e-06	8.39528	7.59858	6.23857	6.74605	7.50934	1.32004	0.361986	-1.27348	-0.663215	0.254667	0.88594	0.0892442	-1.27077	-0.763289	1.84797	1.06381	-2.4129	-1.69736	2.69362	0.257616	-2.75897	-2.00691	0.00908071	0.797556	0.00761189	0.0491243	2.04188	0.0982386	2.11851	1.3087	0.0189875	0.84823	0.0161464
MS4A1	139	0.0677401	0.187544	0.255284	0.946305	0.265352	0.734648	0.82947	94.3382	98.3382	98.5415	98.497	61.8583	4	62	5.86129e-21	7.25791	8.11674	6.03424	6.30733	8.43519	0.0259883	0.833845	-1.12505	-0.868173	1.13339	-1.17728	-0.318445	-2.40095	-2.12786	-2.2615	-1.24699	-5.2815	-4.37069	-7.70226	-1.94859	-11.1978	-12.0278	1.30082e-10	0.0558734	1.57362e-16	7.39939e-18	9.88578	1.25279	15.8031	17.1308	1.23277e-09	0.0966256	1.01884e-14
LAIR1	140	0.394885	0.355391	0.750276	1.14603	0.52632	0.47368	0.73827	140.508	144.508	144.711	144.667	22.2468	4	62	2.00401e-11	7.08924	7.32038	8.84166	8.76255	7.23862	-0.871902	-0.60716	1.13524	1.04463	-0.700805	-0.149384	0.0817608	1.60303	1.52392	-1.1091	1.05831	3.03781	2.87572	-0.708205	0.361222	5.41358	6.23997	0.481472	0.719162	1.06157e-06	4.35681e-08	0.317429	0.143173	5.97405	7.36083	0.605279	0.795643	4.50363e-06
PTGDR2	141	0.0463733	0.464944	0.511317	0.791839	0.0906938	0.909306	0.476214	145.209	149.209	149.412	149.367	11.2797	4	62	6.11255e-07	4.63435	4.77814	6.32516	5.81132	4.87012	-0.873497	-0.680108	1.40055	0.709455	-0.556402	-0.235769	-0.0919792	1.45504	0.941196	-1.17753	-1.06583	2.74165	1.92012	-0.984522	-0.361785	4.33604	3.39744	0.328686	0.718743	5.42868e-05	0.00119277	0.483219	0.143426	4.26531	2.92344	0.443819	0.795643	0.000165668
STAT6	142	0.00408745	0.0532737	0.0573612	0.0899981	0.0712581	0.928742	0.467971	10.1263	14.1263	14.3297	14.2852	10.97	4	62	8.63558e-07	8.61952	8.52052	8.99582	8.66295	8.28904	0.00761599	-0.378857	1.47657	0.177149	-1.28248	0.33048	0.231478	0.706778	0.373909	1.25743	1.17404	1.63215	1.29586	4.08129	2.69679	6.22996	3.99201	0.000130298	0.00900384	4.53123e-08	0.000176027	3.88506	2.04557	7.34378	3.75442	0.000377178	0.0188396	2.46576e-07
CD69	143	0.0631254	0.275761	0.338886	0.352786	0.186273	0.813727	0.319483	116.012	120.012	120.216	120.171	2.22016	4	62	0.0770124	5.19646	5.17523	4.87426	4.9613	5.50065	0.22544	0.138247	-1.09814	-0.74057	1.47503	-0.304189	-0.325415	-0.626392	-0.539348	-1.23472	-1.25302	-1.5437	-1.45332	-1.6438	-1.64842	-2.41398	-2.51859	0.10528	0.104325	0.0187458	0.0143771	0.977653	0.981612	1.7271	1.84233	0.166888	0.165715	0.0365193
IL6	144	0	1.34134	1.34134	4.56091	0	1	0.72373	206.753	208.753	208.819	208.832	40.6044	4	62	1.12524e-16	5.61301	4.77965	8.31902	9.58919	4.84869	-0.463658	-0.843632	0.770152	1.34929	-0.812152	0.764322	-0.0690421	3.47033	4.7405	1.69857	-1.04902	11.0834	26.7321	1.89386	-0.162895	6.14082	10.1589	0.0629118	0.871131	6.42513e-08	8.08674e-15	1.20127	0.0599167	7.19212	14.0922	0.106877	0.901573	3.42971e-07
ARG2	145	0.217449	0.747819	0.965268	1.72419	0.225274	0.774726	0.624808	178.996	182.996	183.199	183.155	20.4182	4	62	9.02743e-11	8.51789	7.39328	8.92168	9.3873	6.65202	0.30491	-0.693479	0.663376	1.07674	-1.35155	1.86587	0.741264	2.26966	2.73528	3.64489	1.67164	4.82209	6.6589	6.1176	2.27542	5.3058	7.74896	7.03586e-08	0.0263483	1.59528e-06	1.07929e-10	7.15268	1.57925	5.79716	9.96686	3.70649e-07	0.049634	6.4651e-06
MPPED1	146	0.00422296	0.0742741	0.078497	0.112987	0.0537977	0.946202	0.404444	29.9989	33.9989	34.2023	34.1578	8.89166	4	62	9.67675e-06	4.57064	4.79207	4.49274	4.27018	4.84464	-0.100355	0.848771	-0.434286	-1.38824	1.07411	-0.274001	-0.0525709	-0.351907	-0.574464	-1.20916	-1.03711	-1.27625	-1.48912	-2.86913	-0.52016	-2.63053	-5.20084	0.00562084	0.604805	0.01074	2.36604e-06	2.2502	0.218385	1.969	5.62598	0.0122434	0.712896	0.021974
ZAP70	147	0.0235524	0.118228	0.14178	0.250326	0.166119	0.833881	0.587208	62.8879	66.8879	67.0913	67.0468	17.7528	4	62	9.28747e-10	4.6796	5.17024	4.45592	4.23742	5.17235	-0.15086	1.01459	-0.682165	-1.20119	1.01962	-0.492758	-0.00211777	-0.716431	-0.934935	-1.40713	-1.00147	-1.64311	-1.9118	-4.06888	-0.0164051	-4.21941	-6.67164	0.000135887	0.986964	8.13031e-05	7.93221e-09	3.86682	0.00569873	4.08989	8.10061	0.000391884	0.989212	0.00024218
IL19	148	0.00422296	0.0742741	0.078497	0.112987	0.0537977	0.946202	0.404444	29.9989	33.9989	34.2023	34.1578	8.89166	4	62	9.67675e-06	4.57064	4.79207	4.49274	4.27018	4.84464	-0.100355	0.848771	-0.434286	-1.38824	1.07411	-0.274001	-0.0525709	-0.351907	-0.574464	-1.20916	-1.03711	-1.27625	-1.48912	-2.86913	-0.52016	-2.63053	-5.20084	0.00562084	0.604805	0.01074	2.36604e-06	2.2502	0.218385	1.969	5.62598	0.0122434	0.712896	0.021974
IL12RB2	149	0	0.197164	0.197164	0.243707	0	1	0.240011	87.8748	89.8748	89.9414	89.9542	4.89502	4	62	0.00170369	4.77716	5.14251	4.8487	4.45516	5.07914	-0.305088	1.03184	-0.0433103	-1.48339	0.79995	-0.30198	0.0633687	-0.230443	-0.623981	-1.23284	1.0449	-1.1732	-1.54112	-1.95166	0.389964	-1.06359	-3.48777	0.0554992	0.6979	0.29164	0.000901557	1.25571	0.156207	0.535154	3.04501	0.0960324	0.783366	0.403889
CRP	150	0.0285183	0.23041	0.258928	0.290258	0.11014	0.88986	0.29639	102.396	106.396	106.599	106.555	3.72537	4	62	0.00882464	4.56894	4.78983	5.34621	5.04134	4.84805	-1.19721	-0.44148	1.46202	0.418982	-0.242313	-0.279107	-0.0582143	0.49816	0.19329	-1.21344	-1.04118	1.41241	1.14337	-1.65412	-0.324555	2.10656	0.990149	0.103158	0.74661	0.0392101	0.32595	0.986496	0.126906	1.4066	0.486849	0.164031	0.816026	0.0705004
IFNAR2	151	0.188809	0.183673	0.372482	0.638821	0.506895	0.493105	0.757112	99.096	103.096	103.299	103.255	32.4595	4	62	1.36525e-14	7.46826	6.63092	7.59331	7.64443	6.08882	0.553439	-0.656165	0.734081	0.807926	-1.43928	1.37945	0.542107	1.50449	1.55561	2.60168	1.4561	2.83725	2.93959	9.0979	3.33248	7.06853	8.86152	5.05112e-13	0.00145505	1.63622e-09	1.28467e-12	12.2966	2.83712	8.78616	11.8912	8.99274e-12	0.00355396	1.18299e-08
FPR2	152	0.14808	1.00653	1.15461	4.72016	0.128252	0.871748	0.811962	194.44	198.44	198.643	198.598	60.7684	4	62	9.06841e-21	7.44329	5.65277	9.98892	10.2883	5.15566	-0.110269	-0.862395	0.959054	1.08482	-1.07121	2.28762	0.497109	4.83326	5.13266	4.88251	1.41138	28.5072	35.082	6.48193	1.3237	9.77031	12.5698	1.68054e-08	0.190463	3.63345e-14	1.05274e-18	7.77455	0.720188	13.4397	17.9777	9.99238e-08	0.280415	9.48392e-13
MAP4K1	153	0.0463511	0.205238	0.251589	0.660706	0.184233	0.815767	0.729461	97.6388	101.639	101.842	101.798	35.6018	4	62	1.96253e-15	6.33495	6.77752	5.2269	5.10822	6.82284	0.33738	0.869008	-0.993639	-1.13619	0.923443	-0.487889	-0.0453163	-1.59594	-1.71461	-1.40239	-1.03191	-3.02292	-3.28209	-3.05622	-0.266119	-7.12964	-9.28146	0.00330427	0.79103	1.28226e-09	2.45333e-13	2.48092	0.101807	8.89202	12.6102	0.00757793	0.844497	9.56263e-09
BATF3	154	0.128994	0.679684	0.808678	2.73102	0.159512	0.840488	0.782176	171.12	175.12	175.323	175.279	48.685	4	62	1.81661e-18	7.33716	5.81935	8.53597	9.41372	5.47532	0.0122923	-0.882196	0.71878	1.23606	-1.08494	1.86184	0.344022	3.06064	3.93839	3.6347	1.26929	8.34344	15.3311	6.41315	1.11197	7.51965	11.7238	2.20447e-08	0.270445	2.69983e-10	2.24541e-17	7.6567	0.567922	9.56866	16.6487	1.27867e-07	0.378279	2.36908e-09
KIR3DL2	155	0.0547378	0.418439	0.473177	0.855096	0.115682	0.884318	0.566973	139.586	143.586	143.789	143.745	16.0058	4	62	4.72253e-09	5.46937	5.66015	7.1259	6.81135	5.32524	-0.734848	-0.504656	1.26389	0.88436	-0.908743	0.144123	0.334904	1.80066	1.48611	1.10506	1.26129	3.48379	2.80132	0.633667	1.38474	5.64873	5.64763	0.528629	0.171094	4.3292e-07	4.3474e-07	0.276849	0.766766	6.36359	6.36177	0.65101	0.255314	1.99256e-06
IL10	156	0	0.240603	0.240603	0.354263	0	1	0.361996	100.22	102.22	102.287	102.299	8.79452	4	62	1.08809e-05	4.88759	4.77965	5.76276	5.58531	4.84869	-0.615397	-0.848296	1.27295	0.890069	-0.699326	0.0388977	-0.0690421	0.914074	0.736624	1.02733	-1.04902	1.88436	1.66627	0.227569	-0.384615	3.81905	3.72722	0.82073	0.701839	0.000312271	0.000421103	0.0857996	0.153763	3.50547	3.37561	0.863801	0.784918	0.00085493
ARHGDIB	157	0.0920068	0.130374	0.222381	0.294474	0.413735	0.586265	0.624025	75.5493	79.5493	79.7527	79.7082	12.6433	4	62	1.392e-07	10.8871	11.3383	10.2813	10.7068	11.2342	-0.00573712	1.05515	-1.43013	-0.429665	0.810386	-0.347117	0.104105	-0.952947	-0.527423	-1.27202	1.07483	-1.93582	-1.44135	-2.71912	0.760837	-5.31883	-3.5688	0.0084792	0.449639	1.51886e-06	0.000698975	2.07165	0.347136	5.81848	3.15554	0.0178632	0.573928	6.18796e-06
TIGIT	158	0.0366846	0.255976	0.29266	0.292502	0.125349	0.874651	0.227701	109.451	113.451	113.655	113.61	1.31231	4	62	0.275312	6.24792	6.33351	6.32056	5.98775	6.43821	-0.10425	0.400658	0.324308	-1.63904	1.01832	-0.190292	-0.104703	-0.117645	-0.45046	-1.14099	-1.07527	-1.08496	-1.36648	-1.0693	-0.552998	-0.471642	-2.1878	0.289079	0.582253	0.638838	0.032463	0.538983	0.234888	0.19461	1.48861	0.401065	0.698551	0.740263
FCER1A	159	0.0659678	0.472052	0.538019	0.645491	0.122612	0.877388	0.354137	147.302	151.302	151.505	151.461	5.21309	4	62	0.00109971	5.47967	5.78311	5.99112	5.11836	6.27871	-0.557117	0.11768	0.580247	-1.36059	1.21978	-0.799039	-0.495596	-0.287588	-1.16035	-1.73994	-1.4099	-1.2206	-2.23511	-3.30673	-1.928	-0.849118	-4.15043	0.00157335	0.0584376	0.399082	0.000102992	2.80318	1.23331	0.398938	3.9872	0.00381268	0.100105	0.519735
CD68	160	0.000830945	0.275785	0.276616	1.12945	0.00300396	0.996996	0.77124	108.85	112.85	113.054	113.009	51.975	4	62	3.91455e-19	7.04723	6.48849	8.87311	8.52487	6.24125	-0.324057	-0.791002	1.20185	0.910827	-0.997621	0.805976	0.247238	2.63185	2.28362	1.74833	1.18693	6.19821	4.86897	4.40239	1.28514	10.2662	10.7878	4.3046e-05	0.203523	5.3546e-15	7.34269e-16	4.36607	0.691387	14.2713	15.1341	0.000133516	0.29684	1.77335e-13
PSMB8	161	0.00776904	0.424766	0.432535	1.12584	0.0179617	0.982038	0.650745	136.428	140.428	140.632	140.587	28.1432	4	62	2.42595e-13	10.8312	9.36547	10.4331	10.9742	8.91021	0.794143	-0.803942	0.360066	0.950038	-1.30031	1.921	0.455258	1.52287	2.06399	3.78686	1.37103	2.87363	4.1814	8.4389	1.89832	4.77713	7.84097	6.87452e-12	0.0623107	1.12923e-05	7.47108e-11	11.1628	1.20544	4.94722	10.1266	9.08735e-11	0.106031	3.80529e-05
KLRF2	162	0	0.15602	0.15602	0.160786	0	1	0.0884502	73.3635	75.3635	75.4302	75.443	1.50401	4	62	0.211978	4.75227	4.79383	4.6597	4.48941	4.84869	0.309019	0.604281	-0.348733	-1.55868	0.994112	-0.0964191	-0.0548644	-0.18899	-0.359276	-1.06912	-1.03876	-1.13997	-1.28278	-0.700507	-0.379545	-0.98056	-2.25751	0.486231	0.70558	0.330621	0.0275084	0.313157	0.151454	0.48067	1.56054	0.609769	0.787672	0.445651
IL1RL1	163	0.353831	0.42431	0.778141	0.705479	0.454713	0.545287	0.490519	149.718	153.718	153.921	153.877	1.48209	4	62	0.218474	5.30083	5.83017	5.45337	5.55249	5.3737	-0.97768	1.59347	-0.236751	0.2447	-0.623743	-0.0728667	0.456468	0.0796718	0.17879	-1.0518	1.37218	1.05678	1.13193	-0.316299	1.84776	0.24639	0.670352	0.752838	0.0694089	0.806194	0.505123	0.123298	1.15858	0.0935605	0.296603	0.817898	0.116185	0.853585
TIRAP	164	0.0317099	0.127296	0.159006	0.192359	0.199425	0.800575	0.4252	68.475	72.475	72.6784	72.6339	5.66583	4	62	0.000594281	6.29941	6.62555	7.01156	6.40376	6.34419	-0.809309	0.302125	1.6176	-0.45371	-0.656705	-0.04478	0.281358	0.667369	0.0595665	-1.03153	1.21534	1.58817	1.04215	-0.35605	2.09612	3.78392	0.409259	0.723012	0.0401594	0.000350267	0.68376	0.140854	1.39621	3.4556	0.165096	0.798736	0.0721229	0.000952183
CCL22	165	0	0.239399	0.239399	0.355417	0	1	0.367251	99.9088	101.909	101.975	101.988	8.99627	4	62	8.53238e-06	4.69802	4.77965	6.01196	4.78967	4.84869	-0.591289	-0.443951	1.78044	-0.425868	-0.319327	-0.150668	-0.0690421	1.16327	-0.0590236	-1.11008	-1.04902	2.23965	-1.04176	-0.883686	-0.385581	4.87243	-0.299402	0.380279	0.701127	7.97927e-06	0.765635	0.419897	0.154204	5.09804	0.115978	0.499898	0.784618	2.78011e-05
XBP1	166	0.18143	0.388023	0.569453	0.747895	0.318604	0.681396	0.556102	140.803	144.803	145.006	144.962	10.6458	4	62	1.24466e-06	8.81474	7.9477	8.34775	8.78482	7.5794	0.971422	-0.648755	0.0987938	0.91552	-1.33698	1.23534	0.368303	0.768352	1.20542	2.35436	1.29083	1.70332	2.30605	5.61467	1.56395	2.48897	4.73306	4.93294e-07	0.122919	0.0155099	1.32471e-05	6.30689	0.910379	1.80939	4.87788	2.23762e-06	0.191208	0.0307206
MEF2BNB	167	0	0.271418	0.271418	0.677643	0	1	0.623741	107.692	109.692	109.758	109.771	25.6951	4	62	1.40716e-12	4.8156	4.82725	6.0985	6.41156	4.84869	-0.7419	-0.727114	0.885853	1.28307	-0.699912	-0.0330925	-0.0214385	1.24981	1.56287	-1.0232	-1.01497	2.3781	2.95442	-0.182284	-0.112445	4.91641	7.44552	0.855954	0.910834	6.79173e-06	3.63114e-10	0.0675494	0.0405607	5.16802	9.43996	0.889753	0.932946	2.39069e-05
IFNB1	168	0	0.201173	0.201173	0.214248	0	1	0.117937	89.1228	91.1228	91.1894	91.2022	2.07244	4	62	0.0951715	4.84137	4.77965	4.95427	5.24563	4.84869	-0.499703	-0.832979	0.109851	1.68303	-0.460199	-0.00731646	-0.0690421	0.105578	0.396944	-1.00508	-1.04902	1.07593	1.31672	-0.0468118	-0.420623	0.482407	2.19652	0.962814	0.675485	0.631216	0.0318027	0.0164578	0.170384	0.199822	1.49754	0.970375	0.767126	0.734471
RUNX1	169	0.00434898	0.103551	0.1079	0.159761	0.0403058	0.959694	0.408568	49.9998	53.9998	54.2032	54.1587	9.48552	4	62	4.76537e-06	7.49789	7.41011	7.52989	8.0295	7.26723	-0.170076	-0.474502	-0.0590836	1.67373	-0.970073	0.230658	0.142884	0.262659	0.76227	1.17337	1.10411	1.19969	1.69616	2.04772	1.2004	1.66481	5.85138	0.0448297	0.23455	0.100998	1.98232e-07	1.34843	0.629764	0.995688	6.70283	0.0795365	0.335695	0.161011
IL10RA	170	0.0391281	0.118927	0.158055	0.192993	0.24756	0.75244	0.468581	65.6165	69.6165	69.8199	69.7754	7.57052	4	62	4.93918e-05	8.21846	8.15672	7.49073	7.73773	7.98886	0.989837	0.786091	-1.41157	-0.596525	0.23217	0.229606	0.167862	-0.498125	-0.25113	1.17251	1.12339	-1.41238	-1.19014	1.88696	1.29081	-2.91852	-1.78319	0.0638502	0.201561	0.00489496	0.0794498	1.19484	0.695594	2.31025	1.09991	0.108292	0.294361	0.0109013
CD86	171	0	0.129013	0.129013	0.271436	0	1	0.553507	61.5793	63.5793	63.6459	63.6587	19.215	4	62	2.53125e-10	6.68218	6.48114	5.42843	5.89152	6.40522	0.988588	0.594631	-1.46828	-0.560793	0.445851	0.276961	0.0759228	-0.976787	-0.513694	1.21164	1.05404	-1.96808	-1.4277	2.21279	0.577589	-5.57324	-3.54959	0.0306027	0.565634	5.78054e-07	0.000742655	1.51424	0.247465	6.23803	3.12921	0.0567126	0.683733	2.57284e-06
IL12RB1	172	0.0414866	0.272964	0.314451	0.616705	0.131934	0.868066	0.610072	113.659	117.659	117.862	117.818	20.5717	4	62	7.93366e-11	6.49087	5.81144	7.20149	7.03158	5.55812	0.0995301	-0.83751	1.0796	0.845255	-1.18688	0.932748	0.253319	1.64338	1.47346	1.90891	1.19195	3.12396	2.77687	5.07441	1.29486	6.37817	6.92818	3.79055e-06	0.200168	2.53039e-08	2.86228e-09	5.4213	0.698604	7.59681	8.54329	1.39819e-05	0.292744	1.45132e-07
C4A	173	0.0388391	0.387975	0.426814	1.05835	0.0909977	0.909002	0.673019	134	138	138.203	138.158	28.7225	4	62	1.62305e-13	6.34491	5.61496	7.39276	7.40088	5.16293	-0.0377445	-0.755624	0.992785	1.00077	-1.20019	1.18198	0.452036	2.22984	2.23796	2.26889	1.36797	4.69081	4.71728	5.40309	1.94633	7.27412	8.84331	1.10459e-06	0.0561506	7.2025e-10	1.38066e-12	5.9568	1.25065	9.14252	11.8599	4.67328e-06	0.096938	5.74708e-09
B2M	174	0.0316515	0.260752	0.292404	0.467554	0.108246	0.891754	0.505389	109.998	113.998	114.202	114.157	13.1393	4	62	8.259e-08	15.7716	15.1585	15.514	16.1438	14.8378	0.561095	-0.639769	0.056586	1.29019	-1.2681	0.933801	0.320762	0.67625	1.306	1.9103	1.24899	1.59798	2.47255	5.20261	1.68138	2.68838	6.28942	2.35038e-06	0.097721	0.00920903	3.58775e-08	5.62886	1.01001	2.03579	7.44518	9.04143e-06	0.156924	0.0192297
APP	175	0.0536646	0.116412	0.170077	0.322883	0.315531	0.684469	0.691435	66.0809	70.0809	70.2843	70.2398	24.545	4	62	3.32919e-12	8.09659	7.74326	8.73947	8.68788	7.59498	-0.143945	-0.814487	1.07611	0.978212	-1.09589	0.501605	0.148279	1.14448	1.0929	1.41579	1.10825	2.21067	2.13302	4.16243	1.14966	6.76892	7.83486	9.88567e-05	0.254701	5.39182e-09	7.65566e-11	4.00499	0.59397	8.26826	10.116	0.000290256	0.36068	3.5409e-08
DDIT3	176	0.103302	0.424909	0.528211	1.14703	0.195569	0.804431	0.678029	143.094	147.094	147.297	147.253	27.3704	4	62	4.18121e-13	6.85495	6.06488	7.70017	8.21446	5.87013	-0.0847119	-0.863207	0.748134	1.25489	-1.0551	0.98482	0.194751	1.83005	2.34434	1.97907	1.14453	3.55549	5.07828	4.28629	0.794312	5.67999	8.81696	6.45333e-05	0.430044	3.83955e-07	1.53249e-12	4.19022	0.366487	6.41572	11.8146	0.000195056	0.55273	1.78493e-06
APOE	177	0.0448684	0.278815	0.323683	0.442045	0.138618	0.861382	0.445286	115.197	119.197	119.401	119.356	8.76645	4	62	1.12568e-05	4.72843	4.80078	5.48077	5.74467	4.8542	-0.855164	-0.697879	0.780504	1.35427	-0.581735	-0.125765	-0.0534209	0.626569	0.890477	-1.09109	-1.03772	1.54389	1.85379	-0.67682	-0.270032	2.40547	4.14177	0.501038	0.788033	0.0191489	0.000106083	0.30013	0.103456	1.71786	3.97435	0.623766	0.842172	0.0371871
PDGFRB	178	0.0548114	0.211556	0.266367	0.322581	0.205774	0.794226	0.430964	100.154	104.154	104.357	104.313	5.84574	4	62	0.000466539	4.82773	5.3574	4.85719	4.74303	5.36477	-0.663001	1.07295	-0.566449	-0.940597	1.09709	-0.537043	-0.00736586	-0.507583	-0.621743	-1.451	-1.00512	-1.42167	-1.53873	-3.31184	-0.0425527	-2.23204	-3.31309	0.00154917	0.966195	0.029235	0.0015433	2.8099	0.0149353	1.5341	2.81155	0.0037719	0.973146	0.05444
IL7R	179	0.0969393	0.242607	0.339547	1.22524	0.285496	0.714504	0.830015	110.832	114.832	115.035	114.991	61.7656	4	62	6.08146e-21	9.59482	10.2432	7.41457	8.46017	10.5334	0.266119	0.765434	-1.41283	-0.607645	0.988923	-0.938622	-0.29022	-3.11888	-2.07328	-1.9167	-1.22283	-8.68711	-4.20842	-5.39756	-1.56024	-12.7844	-10.3004	1.12799e-06	0.123795	4.91435e-19	4.69653e-15	5.94769	0.907298	18.3085	14.3282	4.75269e-06	0.192375	2.16231e-16
MAP4K2	180	0.0369314	0.205335	0.242266	0.282035	0.152441	0.847559	0.361793	96.6816	100.682	100.885	100.84	4.23996	4	62	0.00425298	6.29795	6.67095	5.79072	6.31044	6.39514	0.0154106	1.18634	-1.5769	0.0546213	0.320528	-0.0971948	0.275804	-0.604424	-0.0847042	-1.06969	1.21067	-1.52037	-1.06047	-0.609239	1.62277	-2.70248	-0.458859	0.544592	0.109714	0.00886742	0.64794	0.263929	0.959739	2.0522	0.188465	0.665877	0.173114	0.0186046
TNFRSF13B	181	0	0.137373	0.137373	0.159095	0	1	0.188869	65.4718	67.4718	67.5385	67.5512	3.60913	4	62	0.0104189	4.58165	4.7895	5.21252	4.80411	4.84869	-1.16168	-0.252738	1.59716	-0.188853	0.00610704	-0.267039	-0.0591904	0.363829	-0.0445819	-1.20334	-1.04188	1.28684	-1.03138	-2.06759	-0.43638	2.01174	-0.298538	0.0428583	0.664077	0.0485983	0.766291	1.36796	0.177782	1.31338	0.115606	0.0764352	0.75754	0.0854608
TRAF2	182	0.0700046	0.560789	0.630794	0.882394	0.110979	0.889021	0.436827	157.574	161.574	161.777	161.733	8.73214	4	62	1.17345e-05	4.83886	4.82833	6.65653	5.61311	5.00819	-0.707461	-0.720992	1.62997	0.288189	-0.489706	-0.169334	-0.179857	1.64834	0.604922	-1.12454	-1.13277	3.13473	1.5209	-0.643243	-0.642687	4.4677	1.98621	0.522439	0.522797	3.42058e-05	0.0514356	0.281965	0.281667	4.4659	1.28874	0.646342	0.646342	0.000108055
SLAMF7	183	0.390219	0.647038	1.03726	1.09029	0.376203	0.623797	0.494702	173.949	177.949	178.153	178.108	4.9757	4	62	0.00152401	7.22909	6.71066	5.82152	7.42502	6.73064	0.717482	-0.117078	-1.54837	1.03288	-0.0849081	0.498454	-0.0199844	-0.909121	0.694381	1.4127	-1.01395	-1.8779	1.61819	1.75329	-0.065615	-2.27872	2.10988	0.0844942	0.947895	0.0261393	0.038912	1.07317	0.0232396	1.58271	1.40992	0.138133	0.961618	0.0492797
POU2F2	184	0.0765638	0.262456	0.33902	0.340177	0.225839	0.774161	0.332642	114.093	118.093	118.296	118.252	1.88985	4	62	0.123448	5.62217	5.89442	5.34321	5.48057	5.78067	-0.00918765	1.21731	-1.26591	-0.647078	0.704866	-0.158502	0.113749	-0.437462	-0.300097	-1.11613	1.08204	-1.35422	-1.23123	-0.877198	0.589381	-1.72621	-1.43505	0.383766	0.557748	0.0892898	0.156299	0.415934	0.253562	1.0492	0.806044	0.503835	0.677124	0.144796
NFKB1	185	0.00670538	0.232831	0.239536	0.404217	0.0279932	0.972007	0.470463	99.6535	103.653	103.857	103.812	12.8252	4	62	1.14831e-07	8.47041	8.31364	8.86634	9.43326	8.18953	-0.365248	-0.676066	0.419728	1.54371	-0.922125	0.280881	0.124109	0.67681	1.24373	1.21494	1.08983	1.5986	2.3681	1.66484	0.697224	2.86438	6.37463	0.100991	0.488269	0.00569574	2.56588e-08	0.995718	0.311341	2.24445	7.59076	0.161011	0.611328	0.012389
TNFRSF14	186	0.0379997	0.17657	0.21457	0.528515	0.177097	0.822903	0.708642	88.0948	92.0948	92.2982	92.2537	30.0731	4	62	6.48445e-14	6.28101	6.24311	7.60438	7.28006	5.85738	-0.497597	-0.548271	1.27173	0.838121	-1.06398	0.423627	0.385726	1.747	1.42268	1.3413	1.30652	3.35659	2.68083	2.86152	2.44323	8.41609	8.30452	0.00574123	0.0174178	7.52786e-12	1.174e-11	2.24099	1.75901	11.1233	10.9303	0.0124792	0.0341047	9.8663e-11
TNFAIP6	187	0.556703	1.26726	1.82396	5.7419	0.305217	0.694783	0.810924	213.84	217.84	218.043	217.999	56.5398	4	62	5.23805e-20	9.29678	6.5889	10.2259	11.6316	5.83202	0.237689	-0.868721	0.617316	1.19169	-1.17797	3.46476	0.756879	4.39387	5.79962	11.0407	1.68983	21.0226	55.7007	8.7153	1.77919	7.87768	12.6033	2.29269e-12	0.0801103	6.45151e-11	9.34404e-19	11.6397	1.09631	10.1903	18.0295	3.31525e-11	0.131805	6.62355e-10
ICOSLG	188	0.0114785	0.273675	0.285153	0.316798	0.0402538	0.959746	0.211707	110.254	114.254	114.457	114.413	3.00276	4	62	0.0249075	4.70664	4.89549	5.48359	4.6554	4.90185	-0.674048	-0.100525	1.68542	-0.82964	-0.0812108	-0.195217	-0.00636017	0.581741	-0.246453	-1.1449	-1.00442	1.49665	-1.18629	-1.06606	-0.032868	2.2681	-1.16371	0.29053	0.973885	0.0268171	0.249001	0.536809	0.0114921	1.57159	0.603799	0.402896	0.979291	0.0503945
CIITA	189	0.0376212	0.433016	0.470637	1.36864	0.0799369	0.920063	0.716635	140.383	144.383	144.586	144.542	36.1127	4	62	1.44765e-15	6.04482	6.93995	4.63146	4.4818	6.96273	0.192994	0.935478	-0.97935	-1.10349	0.954368	-0.917905	-0.0227743	-2.33127	-2.48093	-1.88937	-1.01591	-5.03248	-5.58258	-3.97406	-0.0929514	-7.20355	-9.28553	0.000186927	0.926242	9.54711e-10	2.41449e-13	3.72833	0.0332756	9.02013	12.6172	0.000529654	0.946525	7.3147e-09
FCGRT	190	0.10291	0.233376	0.336286	0.401432	0.30602	0.69398	0.501987	108.959	112.959	113.162	113.118	5.5067	4	62	0.000737032	6.62593	6.69531	7.54162	6.86792	6.47667	-0.518325	-0.351501	1.68351	0.0635438	-0.877231	0.149259	0.218636	1.06494	0.391242	1.109	1.16363	2.09209	1.31152	0.874883	1.1976	4.44913	1.9812	0.385014	0.235632	3.65213e-05	0.0520085	0.414523	0.627765	4.43745	1.28393	0.5044	0.336774	0.000114547
RAC1	191	0.0274725	0.0891691	0.116642	0.122461	0.235529	0.764471	0.371044	47.4314	51.4314	51.6348	51.5903	3.40137	4	62	0.0140321	8.94306	8.76711	8.60508	8.71196	8.59162	1.53484	0.303335	-0.830705	-0.0826046	-0.924862	0.351437	0.175482	0.0134531	0.12034	1.27583	1.12934	1.00937	1.08699	3.3362	1.55922	0.0910535	0.987069	0.00143864	0.124035	0.927744	0.327446	2.84205	0.906454	0.032572	0.484861	0.00351946	0.192555	0.94743
FOXJ1	192	0.0165088	0.218436	0.234945	0.248987	0.0702667	0.929733	0.211168	97.5713	101.571	101.775	101.73	2.28662	4	62	0.0699973	4.57595	4.77738	5.20274	4.82233	4.86222	-1.20023	-0.311938	1.56376	-0.113743	0.062146	-0.286269	-0.0848313	0.340522	-0.0398864	-1.21948	-1.06056	1.26622	-1.02803	-1.74602	-0.488146	1.48243	-0.210317	0.0857617	0.627168	0.143292	0.83411	1.06671	0.202616	0.843777	0.0787765	0.139908	0.731142	0.218269
F13A1	193	0.163592	0.287288	0.450879	0.569918	0.362828	0.637172	0.570354	123.278	127.278	127.482	127.437	8.90879	4	62	9.47905e-06	8.28166	7.99443	8.10395	9.05919	7.869	0.0425001	-0.567481	-0.334894	1.69372	-0.833849	0.412656	0.125427	0.234948	1.19019	1.33113	1.09083	1.17686	2.28182	2.17862	0.618234	0.88394	5.42807	0.03317	0.538685	0.380143	1.00479e-06	1.47925	0.268665	0.420052	5.99792	0.0609568	0.659912	0.499898
BTK	194	0.0244443	0.164492	0.188936	0.256337	0.129379	0.870621	0.434311	82.171	86.171	86.3744	86.3299	8.86748	4	62	9.96301e-06	6.87251	6.44409	6.85227	7.107	6.28717	0.474781	-0.797271	0.414676	1.17102	-1.26321	0.585346	0.156925	0.565103	0.819837	1.5004	1.11491	1.47949	1.76521	4.10256	1.03354	2.82563	4.9663	0.000121231	0.305366	0.0063414	5.6535e-06	3.91639	0.51518	2.19781	5.24768	0.000352588	0.418355	0.0136584
IL17A	195	0.00466233	0.0871132	0.0917756	0.111976	0.0508014	0.949199	0.294123	39.754	43.754	43.9574	43.9129	5.01108	4	62	0.00145146	4.57104	4.79383	4.49541	4.40739	4.84333	-0.270378	0.907106	-0.670123	-1.13535	1.16875	-0.272291	-0.049504	-0.347925	-0.435948	-1.20772	-1.03491	-1.27273	-1.3528	-2.63332	-0.452522	-2.40206	-3.64524	0.0106612	0.652473	0.0193122	0.000548161	1.9722	0.185438	1.71417	3.26109	0.021974	0.750136	0.0374569
BLK	196	0.0642585	0.137793	0.202052	0.322772	0.31803	0.68197	0.634724	76.5988	80.5988	80.8022	80.7577	15.7726	4	62	5.90527e-09	4.86381	5.44196	5.02393	4.61399	5.59519	-0.600774	0.822939	-0.206467	-1.21597	1.20027	-0.731373	-0.153227	-0.571252	-0.981192	-1.66022	-1.11205	-1.48581	-1.9741	-5.57822	-1.09188	-3.10531	-6.46511	5.67139e-07	0.279109	0.00286478	1.79593e-08	6.24631	0.554226	2.54291	7.74571	2.53894e-06	0.388458	0.00666933
CD59	197	0.175311	0.6174	0.792711	1.85904	0.221154	0.778846	0.712534	166.998	170.998	171.201	171.157	31.6787	4	62	2.25384e-14	9.71461	8.63256	10.6529	11.3624	8.27284	-0.00952741	-0.836722	0.707796	1.25017	-1.11171	1.44176	0.359716	2.38009	3.08957	2.71653	1.28317	5.2057	8.5124	5.20288	1.21549	6.12411	9.63369	2.34806e-06	0.228788	6.85907e-08	6.18342e-14	5.62929	0.640566	7.16373	13.2088	9.04143e-06	0.328364	3.62366e-07
HLA-DQA1	198	0.22989	0.2742	0.50409	1.14676	0.45605	0.54395	0.79747	122.681	126.681	126.885	126.84	45.472	4	62	8.7822e-18	8.22805	9.17207	7.29555	7.01533	9.36324	0.0124163	0.900557	-0.864876	-1.12851	1.08041	-1.1352	-0.191174	-2.06769	-2.34791	-2.19649	-1.14169	-4.19214	-5.09087	-6.12976	-0.962632	-7.95439	-10.9508	6.70933e-08	0.339472	4.74824e-11	3.97148e-16	7.17332	0.469196	10.3235	15.401	3.55675e-07	0.455587	5.00842e-10
CAMP	199	0.28672	0.460495	0.747215	1.23925	0.383718	0.616282	0.683784	153.048	157.048	157.252	157.207	23.8193	4	62	5.80396e-12	10.3314	9.57636	11.1801	11.1868	8.90488	0.0953798	-0.658607	0.942844	0.949518	-1.32914	1.42653	0.671476	2.27519	2.28187	2.68799	1.5927	4.84062	4.86309	5.94747	2.61288	6.75927	8.21804	1.36559e-07	0.0112513	5.60267e-09	1.65733e-11	6.86468	1.9488	8.25161	10.7806	6.71888e-07	0.0229649	3.67154e-08
ATG5	200	0.00236202	0.105946	0.108308	0.128293	0.0218083	0.978192	0.23764	50.53	54.53	54.7334	54.6889	4.08127	4	62	0.00532144	7.27837	7.18763	7.06884	7.62262	7.22734	0.00676311	-0.429238	-1.00004	1.66096	-0.23844	0.0510295	-0.0397071	-0.158498	0.395285	1.036	-1.02791	-1.11612	1.3152	0.44867	-0.331189	-0.995089	3.00546	0.655234	0.741619	0.323561	0.00382411	0.183604	0.129819	0.490044	2.41747	0.751233	0.812877	0.43863
NOX1	201	0.0107474	0.0680279	0.0787753	0.104957	0.136431	0.863569	0.429662	27.6655	31.6655	31.8689	31.8244	7.97556	4	62	2.97229e-05	4.56277	4.82078	4.66168	4.33889	4.8451	-0.400976	0.844404	0.0764457	-1.48166	0.961788	-0.28232	-0.0243183	-0.183414	-0.506203	-1.21615	-1.017	-1.13557	-1.42031	-3.07612	-0.248903	-1.42566	-4.76693	0.00311902	0.804259	0.158981	1.17181e-05	2.50598	0.0946042	0.798654	4.93114	0.00720674	0.851828	0.238976
FKBP5	202	0.00611219	0.505124	0.511236	1.42564	0.0119557	0.988044	0.670518	146.858	150.858	151.061	151.017	30.7885	4	62	4.03147e-14	9.49317	8.18338	10.1413	10.5009	7.97116	0.206437	-0.943296	0.775386	1.09105	-1.12958	1.52201	0.21222	2.17017	2.52978	2.87192	1.15847	4.50076	5.77484	6.13565	0.812836	6.24737	8.81953	6.55649e-08	0.419422	4.23211e-08	1.51697e-12	7.18333	0.377348	7.37344	11.819	3.48172e-07	0.542326	2.33049e-07
SRC	203	0.0473913	0.307651	0.355042	0.946296	0.133481	0.866519	0.713705	121.128	125.128	125.331	125.287	32.7688	4	62	1.12187e-14	5.771	5.18017	7.24014	7.01257	5.12559	-0.293771	-0.882341	1.16977	0.943066	-0.93672	0.645409	0.0545867	2.11455	1.88698	1.56418	1.03856	4.33054	3.6986	3.30717	0.26279	7.72984	8.3569	0.00157126	0.793584	1.165e-10	9.52868e-12	2.80375	0.100407	9.93368	11.021	0.00381062	0.845757	1.12131e-09
DEFB4A	204	0.0769431	0.837588	0.914531	1.55638	0.0841339	0.915866	0.51878	181.451	185.451	185.655	185.61	13.8246	4	62	4.07036e-08	4.79127	4.77071	7.04662	6.52184	4.88276	-0.740781	-0.759552	1.31835	0.839231	-0.657247	-0.0914945	-0.112054	2.16385	1.63908	-1.06547	-1.08077	4.4811	3.11467	-0.284753	-0.32865	4.80621	4.40981	0.776783	0.743528	1.01598e-05	4.19401e-05	0.109701	0.128703	4.99312	4.37737	0.835689	0.813617	3.46918e-05
NLRP3	205	0	0.443686	0.443686	0.787991	0	1	0.471064	138.162	140.162	140.229	140.241	13.8041	4	62	4.15617e-08	7.0656	6.10689	6.92711	7.14596	5.65221	0.732486	-0.71232	0.523779	0.85359	-1.39754	1.41339	0.45468	1.2749	1.49375	2.66363	1.37048	2.41983	2.8162	6.08926	1.86522	3.92251	5.56584	7.85995e-08	0.0668837	0.000221967	5.94628e-07	7.10458	1.17468	3.65371	6.22575	4.09622e-07	0.112508	0.000623775
CD70	206	0.0385329	0.433023	0.471556	1.25633	0.0817143	0.918286	0.691512	140.453	144.453	144.657	144.612	31.1365	4	62	3.20753e-14	4.64906	4.77048	7.11583	6.61903	4.86188	-0.815721	-0.711923	1.29307	0.868364	-0.633788	-0.212818	-0.0913988	2.25395	1.75715	-1.15895	-1.0654	4.76988	3.3803	-0.921295	-0.372944	6.96379	6.57584	0.360468	0.710462	2.48381e-09	1.15933e-08	0.443134	0.148459	8.60488	7.93579	0.477728	0.791687	1.7308e-08
OAS3	207	0.283261	1.74255	2.02581	6.18247	0.139826	0.860174	0.752196	228.856	232.856	233.059	233.014	41.9885	4	62	5.33268e-17	10.0424	6.5326	9.37207	11.1752	5.71781	0.630327	-0.870195	0.34376	1.11465	-1.21854	4.32455	0.814785	3.65426	5.45739	20.0363	1.75904	12.5904	43.9376	9.30898	1.64729	5.61143	10.153	2.20208e-13	0.104559	4.99453e-07	8.27193e-15	12.6572	0.980639	6.30151	14.0824	4.5216e-12	0.166001	2.25891e-06
SIGLEC1	208	0	0.673849	0.673849	2.1881	0	1	0.710704	164.071	166.071	166.138	166.15	38.0783	4	62	4.61278e-16	6.35861	4.85129	7.69393	7.98882	4.84869	0.00689837	-0.998428	0.897507	1.09419	-1.00016	1.50992	0.00260423	2.84524	3.14013	2.84795	1.00181	7.18627	8.81606	5.27854	0.00866887	7.10335	9.49418	1.7677e-06	0.993111	1.4241e-09	1.06598e-13	5.75259	0.00300214	8.84646	12.9722	7.10774e-06	0.993756	1.04434e-08
CEACAM3	209	0.116641	0.46177	0.578411	1.10794	0.201657	0.798343	0.638125	148.43	152.43	152.634	152.589	22.0311	4	62	2.38449e-11	4.96408	4.97782	6.2679	6.91543	4.80244	-0.654798	-0.640322	0.718976	1.40125	-0.825106	0.161637	0.175375	1.46546	2.11299	1.11856	1.12926	2.76151	4.32588	0.674745	0.685913	4.36233	7.62192	0.502346	0.495325	4.95278e-05	1.79363e-10	0.298997	0.30511	4.30515	9.74627	0.624637	0.618404	0.000152089
PTPN22	210	0.0602329	0.157485	0.217718	0.373392	0.276656	0.723344	0.637569	83.8081	87.8081	88.0115	87.9669	19.0644	4	62	2.88678e-10	7.26799	8.03317	6.79872	7.21866	7.98475	-0.361496	1.07416	-1.24194	-0.454045	0.98332	-0.716764	0.0484173	-1.18603	-0.766092	-1.64349	1.03413	-2.27525	-1.70066	-5.11649	0.323173	-6.03504	-4.72468	3.24167e-06	0.747652	9.71154e-08	1.36549e-05	5.48923	0.1263	7.01271	4.86471	1.21612e-05	0.816372	4.90353e-07
IL1R1	211	0.138055	0.715501	0.853556	1.82728	0.161741	0.838259	0.657455	174.374	178.374	178.577	178.533	25.1084	4	62	2.17687e-12	8.00472	7.64945	10.2018	9.81385	7.16027	-0.413683	-0.67551	1.20558	0.919644	-1.03604	0.844444	0.489183	3.04156	2.65358	1.79557	1.40365	8.23379	6.29225	2.83479	1.54084	7.28273	7.69835	0.00618291	0.128444	6.95908e-10	1.32134e-10	2.20881	0.891286	9.15745	9.87898	0.0133825	0.198101	5.59633e-09
IL1R2	212	0.0647859	0.915047	0.979833	2.77087	0.0661194	0.933881	0.70253	186.215	190.215	190.419	190.374	33.6812	4	62	6.33085e-15	8.82737	9.15266	11.7538	12.1168	8.66273	-0.755909	-0.563103	0.978667	1.19384	-0.853499	0.164644	0.489928	3.09105	3.45408	1.12089	1.40437	8.52117	10.9592	0.490764	1.37828	6.57662	8.90111	0.625326	0.173069	1.15573e-08	1.09845e-12	0.203894	0.761781	7.93714	11.9592	0.729547	0.257638	7.13358e-08
CYBB	213	0.00675933	0.306048	0.312807	1.48369	0.0216086	0.978391	0.809549	116.29	120.29	120.494	120.449	64.276	4	62	2.27421e-21	10.6859	9.66061	12.3009	12.113	9.32922	-0.0967499	-0.848045	1.08666	0.949006	-1.09088	1.35668	0.331389	2.97167	2.78381	2.56094	1.25822	7.84445	6.8867	7.01842	1.62635	10.9774	12.4537	1.99799e-09	0.108947	3.59348e-16	1.59358e-18	8.69941	0.962785	15.4445	17.7976	1.41793e-08	0.17208	1.78358e-14
CCL18	214	0.00692948	0.0907667	0.0976962	0.130396	0.0709289	0.929071	0.374284	43.1497	47.1497	47.353	47.3085	7.28398	4	62	7.10581e-05	4.57246	4.79631	5.13894	4.43368	4.8374	-0.677866	0.149972	1.41708	-1.19111	0.301922	-0.264935	-0.0410871	0.301539	-0.403715	-1.20158	-1.02889	1.23246	-1.32291	-2.50665	-0.366738	2.03633	-3.3022	0.0148244	0.715063	0.045994	0.00159505	1.82902	0.145656	1.3373	2.79723	0.0294956	0.793536	0.081398
NFKB2	215	0	0.422672	0.422672	1.12016	0	1	0.645538	135.154	137.154	137.22	137.233	28.2283	4	62	2.28621e-13	5.56367	5.43916	6.44017	7.63566	5.18157	-0.486538	-0.610571	0.386663	1.57764	-0.867195	0.382098	0.257596	1.25861	2.45409	1.30324	1.19549	2.39264	5.47969	1.6866	1.08268	3.96746	9.36872	0.0967057	0.283142	0.000191094	1.74211e-13	1.01455	0.547995	3.71875	12.7589	0.155456	0.393715	0.000539973
CD244	216	0.10768	0.378373	0.486053	0.67927	0.22154	0.77846	0.517875	136.651	140.651	140.855	140.81	9.48616	4	62	4.76176e-06	5.01408	5.93514	5.05541	5.12833	6.07055	-0.825163	0.95633	-0.74523	-0.604186	1.21825	-1.05647	-0.135416	-1.01515	-0.942225	-2.07984	-1.09841	-2.02111	-1.92149	-4.86999	-0.584487	-3.33655	-3.75292	8.05085e-06	0.561013	0.00143712	0.00038745	5.09416	0.251027	2.84251	3.41178	2.80188e-05	0.680552	0.00351855
CD14	217	0.0427129	0.486966	0.529679	1.16182	0.0806393	0.919361	0.624708	147.69	151.69	151.894	151.849	22.0887	4	62	2.27608e-11	8.2248	8.75443	10.0116	10.3041	8.29132	-0.913387	-0.371331	0.915308	1.21471	-0.845299	-0.0665272	0.463108	1.72027	2.01281	-1.04719	1.37851	3.29497	4.03567	-0.271595	1.78219	5.01225	7.10359	0.786836	0.0796147	4.7719e-06	1.4227e-09	0.104116	1.09901	5.32131	8.84689	0.841462	0.1312	1.73729e-05
KCNJ2	218	0.450153	0.784123	1.23428	2.02094	0.36471	0.63529	0.669347	185.578	189.578	189.782	189.737	21.1924	4	62	4.73132e-11	10.3448	8.74053	9.05709	10.5362	7.95929	0.92998	-0.536709	-0.247293	1.10499	-1.25097	2.38548	0.781244	1.0978	2.5769	5.22517	1.71861	2.14028	5.96656	7.62303	2.33074	2.49995	7.11354	1.78567e-10	0.0230349	0.015081	1.36736e-09	9.7482	1.63761	1.82157	8.86412	1.64175e-09	0.0440942	0.0299867
DUSP4	219	0.0763363	0.200237	0.276573	0.308899	0.276008	0.723992	0.442924	98.6816	102.682	102.885	102.841	5.37958	4	62	0.000876045	5.04257	5.17231	4.90936	4.59567	5.40862	0.0556739	0.484098	-0.384176	-1.41997	1.26437	-0.366053	-0.236305	-0.499261	-0.81295	-1.28882	-1.17797	-1.41349	-1.7568	-2.31735	-1.39883	-2.25302	-4.44638	0.023801	0.166847	0.0278056	3.68769e-05	1.6234	0.777682	1.55587	4.43325	0.0453915	0.249946	0.0520299
SIRPA	220	0.0484626	0.279854	0.328317	0.41609	0.147609	0.852391	0.409761	115.723	119.723	119.926	119.881	7.53558	4	62	5.16219e-05	9.03535	8.80498	9.21135	9.47301	8.36712	0.135661	-0.412727	0.554629	1.17749	-1.45505	0.668232	0.437863	0.844233	1.10589	1.58912	1.3546	1.79531	2.15231	3.58842	2.20759	3.23391	5.13242	0.000656869	0.0309819	0.0019589	3.05487e-06	3.18252	1.50889	2.70799	5.51501	0.00169586	0.0573118	0.00467706
ZBTB16	221	0.0293698	0.326069	0.355439	0.4937	0.0826298	0.91737	0.409082	122.901	126.901	127.104	127.06	8.28493	4	62	2.02645e-05	4.64744	4.77719	6.04757	5.29116	4.86276	-0.839206	-0.611302	1.62005	0.291456	-0.461002	-0.215323	-0.0855701	1.18481	0.428398	-1.16096	-1.06111	2.27334	1.34574	-1.07414	-0.402322	4.21818	1.84742	0.286924	0.688831	8.16475e-05	0.0694582	0.542234	0.161887	4.08806	1.15828	0.39836	0.775722	0.000242736
HRAS	222	0.00908734	0.0843872	0.0934746	0.111577	0.0972172	0.902783	0.326849	39.6501	43.6501	43.8535	43.809	4.9889	4	62	0.00149652	4.72632	4.86839	4.59644	4.45303	4.91168	0.0795653	0.82589	-0.602708	-1.35605	1.0533	-0.185366	-0.0432917	-0.315248	-0.458658	-1.13711	-1.03046	-1.24423	-1.37426	-1.81632	-0.399384	-2.20428	-3.88482	0.0741565	0.690983	0.0312253	0.000251492	1.12985	0.160533	1.50549	3.59948	0.123527	0.777861	0.0576669
KIR3DL1	223	0.0787485	0.83032	0.909069	1.51469	0.0866255	0.913374	0.510275	181.007	185.007	185.21	185.166	13.1571	4	62	8.10729e-08	4.70416	4.80264	7.44526	5.87976	4.87888	-0.719568	-0.634999	1.63419	0.289914	-0.569537	-0.17472	-0.076235	2.56638	1.00089	-1.12875	-1.05426	5.92323	2.00123	-0.546074	-0.224498	5.7243	2.70417	0.586975	0.823108	3.23787e-07	0.00882711	0.231381	0.0845433	6.48974	2.05418	0.701704	0.865542	1.5319e-06
CD19	224	0.0218599	0.566709	0.588568	0.785515	0.0371409	0.962859	0.340493	155.24	159.24	159.443	159.399	6.94412	4	62	0.000109914	5.36213	5.94864	6.44475	6.54995	6.47761	-1.57701	-0.412825	0.571932	0.780736	0.637161	-1.11549	-0.528979	-0.0328621	0.0723326	-2.16668	-1.44291	-1.02304	1.05142	-4.23432	-1.90091	-0.0890624	0.237414	7.72337e-05	0.0619648	0.929319	0.813118	4.11219	1.20785	0.031835	0.0898464	0.000230727	0.105639	0.948357
RIPK1	225	0.0289274	0.184184	0.213112	0.449054	0.135738	0.864262	0.639017	89.3955	93.3955	93.5989	93.5544	24.0111	4	62	5.00603e-12	8.80653	7.88545	8.30321	8.88638	7.61748	0.910793	-0.744783	0.00611211	1.05431	-1.22643	1.18905	0.267966	0.685727	1.26889	2.28002	1.20411	1.60851	2.40977	7.87386	1.66694	3.23941	7.26219	6.55068e-11	0.10057	0.00192695	7.55395e-10	10.1837	0.99753	2.71513	9.12183	6.70303e-10	0.160662	0.00460435
TAPBP	226	0.00601277	0.241238	0.247251	0.713045	0.0243185	0.975682	0.688214	101.672	105.672	105.876	105.831	33.0497	4	62	9.39614e-15	9.30539	8.42311	9.54061	9.96477	8.03435	0.314234	-0.78706	0.607856	1.13731	-1.27234	1.27104	0.388765	1.50627	1.93042	2.41335	1.30927	2.84074	3.81166	7.40405	2.14754	6.26523	9.72412	4.28579e-10	0.0356676	3.94547e-08	4.3482e-14	9.36797	1.44773	7.4039	13.3617	3.5773e-09	0.0649269	2.18231e-07
MALT1	227	0.134984	0.365145	0.500129	1.01161	0.269899	0.730101	0.689583	135.769	139.769	139.972	139.928	25.5941	4	62	1.51621e-12	7.47171	8.12181	5.91739	6.77572	8.42156	0.127846	0.766813	-1.39986	-0.556232	1.06144	-0.949851	-0.299755	-2.50417	-1.64585	-1.93167	-1.23094	-5.67323	-3.12931	-4.45331	-1.3143	-8.36937	-6.66679	3.59877e-05	0.193586	9.06699e-12	8.08615e-09	4.44385	0.713126	11.0425	8.09226	0.000113104	0.283791	1.17833e-10
CD40LG	228	0.00611177	0.264013	0.270124	0.524318	0.0226258	0.977374	0.53542	107.181	111.181	111.384	111.34	17.0015	4	62	1.85025e-09	6.19336	6.3911	5.31928	5.13154	6.5345	0.434158	0.741427	-0.924058	-1.21578	0.964254	-0.341142	-0.1434	-1.21522	-1.40296	-1.26676	-1.1045	-2.32176	-2.64443	-1.89991	-0.757522	-4.83263	-6.75671	0.0620977	0.451607	9.22757e-06	5.65991e-09	1.20692	0.345239	5.03491	8.24719	0.105727	0.575963	3.17907e-05
TMEM173	229	0	0.358068	0.358068	1.02214	0	1	0.670918	124.869	126.869	126.936	126.949	31.6008	4	62	2.3705e-14	8.09768	7.08394	9.0131	8.91178	6.84144	0.107445	-0.900245	1.01741	0.916694	-1.1413	1.25624	0.242502	2.17166	2.07034	2.38872	1.18304	4.50541	4.19986	6.0246	1.10738	7.43761	8.58715	1.0115e-07	0.272408	3.74773e-10	3.81276e-12	6.99503	0.564781	9.42623	11.4188	5.08225e-07	0.380678	3.17989e-09
ICAM3	230	0.0945738	0.201869	0.296443	0.440852	0.319029	0.680971	0.608236	100.3	104.3	104.503	104.459	15.649	4	62	6.65167e-09	7.04247	6.83267	7.80255	7.64469	6.45245	-0.199706	-0.572152	1.14961	0.869376	-1.24713	0.590025	0.380222	1.35011	1.19225	1.50527	1.30154	2.54931	2.28509	3.71793	2.23843	6.06344	6.49025	0.000433953	0.0287929	8.69348e-08	1.62618e-08	3.36256	1.54072	7.06081	7.78883	0.00116022	0.0537467	4.46266e-07
IRF7	231	0.0834949	1.40206	1.48556	4.54319	0.0562045	0.943796	0.72074	212.255	216.255	216.458	216.414	37.6515	4	62	5.89206e-16	9.28889	6.45048	9.48817	9.86556	5.43781	0.586504	-0.821064	0.68533	0.872475	-1.32325	3.85107	1.01267	4.05036	4.42774	14.4307	2.01764	16.5683	21.522	9.2798	2.30521	6.9672	9.22459	2.46939e-13	0.0245147	2.45032e-09	3.06763e-13	12.6074	1.61057	8.61078	12.5132	4.93877e-12	0.0464934	1.71133e-08
CXCR6	232	0.0383519	0.321307	0.359659	0.370588	0.106634	0.893366	0.230668	122.887	126.887	127.091	127.046	1.795	4	62	0.141186	4.84131	5.18168	5.3819	4.81793	5.09009	-0.931475	0.501368	1.34421	-1.02989	0.11579	-0.248779	0.0915946	0.291813	-0.272158	-1.1882	1.06555	1.22418	-1.20761	-1.24872	0.432593	1.04515	-1.1808	0.216461	0.666811	0.300014	0.242192	0.664621	0.175997	0.522859	0.61584	0.312858	0.760377	0.413072
PSMC2	233	0.108218	0.251081	0.359299	0.354528	0.301192	0.698808	0.393026	113.368	117.368	117.572	117.527	1.67631	4	62	0.166827	8.26408	8.12625	7.92407	8.52	8.29026	0.178146	-0.44911	-1.36924	1.34289	0.297306	-0.0261828	-0.164008	-0.366186	0.229745	-1.01831	-1.1204	-1.28894	1.17263	-0.14797	-0.866251	-1.47505	1.12171	0.882846	0.389692	0.145259	0.266312	0.0541149	0.409278	0.837856	0.574609	0.911249	0.509445	0.221047
IL21R	234	0.0380623	0.235966	0.274028	0.425931	0.138899	0.861101	0.512809	104.861	108.861	109.064	109.02	11.5284	4	62	4.64312e-07	6.17585	6.22629	7.43125	6.95881	6.35754	-0.831284	-0.738958	1.46689	0.602033	-0.498684	-0.181685	-0.131251	1.07371	0.601273	-1.13421	-1.09524	2.10484	1.51705	-1.06283	-0.721158	4.48069	3.03993	0.291983	0.473523	3.26709e-05	0.00346339	0.534642	0.324659	4.48584	2.4605	0.404002	0.598022	0.000103419
TNFRSF1B	235	0.02782	0.221569	0.249389	0.598581	0.111552	0.888448	0.672046	100.021	104.021	104.224	104.179	27.6399	4	62	3.45449e-13	8.56032	7.89489	9.1242	9.07161	7.43707	0.193207	-0.707743	0.956668	0.885464	-1.3276	1.12325	0.457816	1.68713	1.63454	2.17837	1.37346	3.22016	3.10489	6.78798	2.60245	7.27475	8.53797	4.9988e-09	0.0115637	7.18458e-10	4.63573e-12	8.30113	1.9369	9.1436	11.3339	3.29685e-08	0.0235402	5.74708e-09
HSPB1	236	0.0749325	0.472441	0.547373	1.49517	0.136895	0.863105	0.721989	147.837	151.837	152.04	151.995	34.8988	4	62	2.99758e-15	4.75624	4.79315	6.96185	7.15631	4.85842	-0.766292	-0.736486	1.01476	1.17179	-0.683776	-0.102186	-0.065275	2.10343	2.29789	-1.0734	-1.04628	4.2973	4.91738	-0.422491	-0.253511	6.20403	8.21118	0.674128	0.800712	5.01629e-08	1.70334e-11	0.171257	0.0965237	7.29962	10.7687	0.766168	0.849885	2.71056e-07
TCF7	237	0.216049	0.582062	0.798111	0.93943	0.270701	0.729299	0.467206	164.7	168.7	168.903	168.859	6.20026	4	62	0.000290825	5.02153	5.52872	6.1742	6.30351	5.79464	-1.43864	-0.456579	0.793267	1.04363	0.0583183	-0.773108	-0.26592	0.379566	0.508869	-1.70895	-1.2024	1.30095	1.42293	-2.87085	-0.923454	1.00475	1.63259	0.00559407	0.359351	0.318923	0.107625	2.25227	0.444482	0.496314	0.968086	0.0122434	0.476453	0.433871
CCR7	238	0.2461	0.303875	0.549974	0.583027	0.447475	0.552525	0.558311	128.842	132.842	133.045	133.001	5.67982	4	62	0.000583173	5.87246	6.38067	5.82525	5.7873	6.59456	-0.59322	0.779701	-0.720756	-0.823262	1.35754	-0.722107	-0.213896	-0.769317	-0.807261	-1.64959	-1.15982	-1.70446	-1.74989	-3.70414	-1.02327	-2.81157	-3.57679	0.000453702	0.310157	0.00659181	0.000681515	3.34323	0.508418	2.181	3.16652	0.00120883	0.423818	0.0141483
CCR8	239	0.00535453	0.0765227	0.0818772	0.115576	0.065397	0.934603	0.40341	32.3393	36.3393	36.5427	36.4982	8.48497	4	62	1.5854e-05	4.59185	4.79342	4.49197	4.27096	4.84377	-0.0281101	0.837642	-0.457111	-1.40636	1.05393	-0.251924	-0.0503578	-0.351805	-0.572811	-1.19079	-1.03552	-1.27616	-1.48742	-2.59683	-0.489947	-2.58851	-5.10472	0.0117353	0.625901	0.0119938	3.38681e-06	1.93051	0.203494	1.92104	5.47021	0.02384	0.729941	0.0243033
CASP1	240	0.0316621	0.730825	0.762487	1.87336	0.0415247	0.958475	0.644274	171.211	175.211	175.414	175.37	26.6395	4	62	7.05845e-13	11.0967	9.27247	10.3806	11.2893	8.58725	0.831732	-0.73015	0.218624	0.996625	-1.31683	2.50944	0.685222	1.79335	2.70203	5.694	1.60795	3.4662	6.50717	8.38503	2.16638	4.27816	7.80659	8.51889e-12	0.0341346	6.63763e-05	8.57178e-11	11.0696	1.46681	4.17799	10.0669	1.11179e-10	0.0625057	0.000200234
PDCD1LG2	241	0.0285717	0.549202	0.577774	1.05742	0.0494513	0.950549	0.52842	153.853	157.853	158.056	158.011	15.8875	4	62	5.28845e-09	5.74843	5.0718	6.11023	7.02067	4.90634	-0.0270221	-0.819801	0.396884	1.46361	-1.01367	0.842096	0.165466	1.2039	2.11434	1.79265	1.12153	2.30361	4.32991	3.24379	0.602547	3.31066	7.04189	0.00190182	0.549007	0.00155473	1.81954e-09	2.72083	0.260422	2.80834	8.74004	0.00455135	0.66968	0.00377947
GZMH	242	0.590005	0.322065	0.91207	1.46642	0.646886	0.353114	0.815498	137.62	141.62	141.823	141.779	36.713	4	62	1.01633e-15	8.96963	9.54478	7.52426	7.47475	9.67054	0.310644	0.847444	-1.03835	-1.08456	0.964826	-0.700916	-0.125767	-2.14628	-2.19579	-1.62554	-1.09109	-4.42686	-4.58141	-3.48858	-0.58284	-7.60799	-9.43845	0.000899303	0.562115	1.89642e-10	1.32566e-13	3.04609	0.250175	9.72206	12.8776	0.00226851	0.681083	1.71794e-09
SELPLG	243	0.104102	0.208194	0.312296	0.372264	0.333343	0.666657	0.522144	102.576	106.576	106.779	106.734	7.83807	4	62	3.52862e-05	8.54721	8.17809	8.70146	8.41625	7.752	0.615904	-0.380294	1.0322	0.262456	-1.53027	0.795212	0.426095	0.949461	0.66425	1.73533	1.34359	1.93115	1.58474	4.93333	2.46906	4.1979	3.55995	6.38268e-06	0.0163159	8.7542e-05	0.000718786	5.195	1.78739	4.05778	3.1434	2.26222e-05	0.0321104	0.000259509
MAVS	244	0.0747876	0.618631	0.693418	1.12452	0.107854	0.892146	0.51204	163.548	167.548	167.752	167.707	12.8459	4	62	1.12351e-07	4.64327	4.78619	6.7359	6.04527	4.87835	-0.837511	-0.682975	1.4253	0.678505	-0.583321	-0.235072	-0.0921591	1.85755	1.16692	-1.17697	-1.06596	3.62392	2.24532	-0.850303	-0.313643	4.79435	3.64851	0.398429	0.754845	1.06073e-05	0.000542471	0.399649	0.122142	4.97439	3.26562	0.519103	0.818634	3.60602e-05
CLEC4A	245	0.19632	0.784093	0.980413	2.08002	0.200242	0.799758	0.67262	181.215	185.215	185.419	185.374	25.9625	4	62	1.15568e-12	8.70458	7.72061	9.77543	10.3278	7.12839	-0.0199236	-0.751779	0.776544	1.18741	-1.19225	1.57619	0.592213	2.64703	3.19944	2.98181	1.50756	6.26377	9.18601	5.04952	1.77763	6.04714	8.85695	4.15711e-06	0.0803696	9.26412e-08	1.30809e-12	5.38121	1.09491	7.0332	11.8834	1.52949e-05	0.132161	4.71077e-07
CREB1	246	0.0155663	0.090213	0.105779	0.158293	0.147158	0.852842	0.499811	45.518	49.518	49.7214	49.6769	10.4219	4	62	1.60617e-06	8.45726	8.35525	7.65456	8.58864	8.29425	0.5178	0.235741	-1.70164	0.881036	0.0670643	0.163017	0.0610051	-0.639684	0.294388	1.11963	1.04319	-1.55799	1.22636	1.54187	0.541744	-4.31589	2.40641	0.128195	0.589937	5.82304e-05	0.0191036	0.892128	0.229195	4.23485	1.71888	0.197816	0.704265	0.000176525
CD276	247	0.0859616	0.410185	0.496146	1.00857	0.173258	0.826742	0.64505	140.236	144.236	144.44	144.395	22.1573	4	62	2.15369e-11	4.69488	4.78492	6.90717	6.15992	4.87537	-0.793137	-0.702686	1.42914	0.678518	-0.611834	-0.180488	-0.0904438	2.0318	1.28455	-1.13327	-1.0647	4.08916	2.43607	-0.79997	-0.375959	6.4228	4.92016	0.426783	0.708231	2.12223e-08	6.699e-06	0.369793	0.149825	7.67321	5.17399	0.549537	0.789772	1.23797e-07
ITGB1	248	0.0185218	0.0610414	0.0795632	0.133407	0.232793	0.767207	0.604618	23.8586	27.8586	28.0619	28.0174	17.1867	4	62	1.55885e-09	9.58854	9.71347	9.01487	9.31534	9.8898	0.244217	0.606878	-1.42102	-0.54881	1.11873	-0.301267	-0.176332	-0.874933	-0.574461	-1.23223	-1.13001	-1.83392	-1.48912	-3.4568	-1.89388	-7.15768	-5.69531	0.000992846	0.0629082	1.14656e-09	3.61997e-07	3.00312	1.20129	8.9406	6.4413	0.00248413	0.106877	8.67667e-09
NFATC2	249	0.00608175	0.152581	0.158663	0.660984	0.0383312	0.961669	0.789126	73.9422	77.9422	78.1456	78.1011	55.6211	4	62	7.77113e-20	6.38725	6.64748	5.00963	5.00926	6.86524	0.445642	0.733066	-1.07594	-1.07635	0.973577	-0.477986	-0.217756	-1.85561	-1.85598	-1.3928	-1.16292	-3.61904	-3.61997	-3.49637	-1.50769	-9.69089	-11.7389	0.000877673	0.136712	4.94833e-14	2.12447e-17	3.05667	0.864193	13.3055	16.6728	0.00221758	0.209593	1.23909e-12
PPARG	250	0	0.131012	0.131012	0.14802	0	1	0.168546	62.5325	64.5325	64.5992	64.612	3.14205	4	62	0.0203759	4.58165	4.77965	4.90547	4.4465	4.84869	-0.679292	0.349439	1.0032	-1.38151	0.70816	-0.267039	-0.0690421	0.0567852	-0.402193	-1.20334	-1.04902	1.04015	-1.32152	-2.11719	-0.521221	0.321517	-2.75784	0.0382629	0.60407	0.7489	0.00763534	1.41722	0.218913	0.125576	2.11717	0.0689583	0.712896	0.816789
HSPB2	251	0.0368047	0.465191	0.501996	0.814699	0.0733168	0.926683	0.487236	144.564	148.564	148.767	148.723	12.4765	4	62	1.66212e-07	6.26011	6.16044	7.79086	7.41167	6.17671	-0.64039	-0.768084	1.32077	0.834955	-0.747247	0.0834052	-0.016264	1.61415	1.23496	1.05952	-1.01134	3.06132	2.35375	0.348524	-0.0641024	4.81423	4.46131	0.728628	0.949095	9.86729e-06	3.49856e-05	0.137494	0.0226904	5.0058	4.45611	0.802538	0.961643	3.37681e-05
IL5RA	252	0.0377047	0.136153	0.173858	0.238107	0.216871	0.783129	0.504727	73.1485	77.1485	77.3519	77.3074	9.69019	4	62	3.74578e-06	4.70991	5.18334	4.53219	4.33755	4.91031	-0.0753699	1.36614	-0.61646	-1.20911	0.534803	-0.2004	0.273037	-0.378111	-0.572757	-1.14902	1.20835	-1.29964	-1.48736	-1.54012	1.96505	-2.07198	-3.80345	0.128619	0.0538925	0.0424328	0.000328633	0.890693	1.26847	1.3723	3.48329	0.198272	0.0936732	0.0757202
RNASEL	253	0.0457241	0.398836	0.44456	0.841963	0.102852	0.897148	0.57917	136.152	140.152	140.355	140.311	17.495	4	62	1.17453e-09	6.86342	5.98492	6.74401	7.22316	5.42603	0.570207	-0.636523	0.406181	1.06436	-1.40423	1.43739	0.558888	1.31798	1.79713	2.7083	1.47313	2.49316	3.47529	6.47682	2.37015	4.2377	6.99967	1.71475e-08	0.0209059	7.63395e-05	2.15298e-09	7.7658	1.67973	4.11725	8.66696	1.01762e-07	0.0403446	0.000228277
CFD	254	0.00814494	0.327354	0.335499	1.85878	0.0242771	0.975723	0.837696	120.596	124.596	124.8	124.755	77.3356	4	62	2.13626e-23	11.2461	11.5258	8.64649	8.41915	11.1581	0.684604	0.867542	-1.01527	-1.16393	0.62705	0.0880165	0.36778	-2.51157	-2.73891	1.06291	1.29037	-5.70239	-6.67565	0.440139	1.74405	-8.96801	-11.8438	0.661367	0.0861061	8.43237e-13	1.44677e-17	0.179558	1.06497	12.0741	16.8396	0.756045	0.140395	1.41922e-11
IFIT3	255	0.266738	2.22221	2.48895	8.91505	0.107169	0.892831	0.778857	242.806	246.806	247.009	246.965	50.3432	4	62	8.30206e-19	13.3847	8.99406	13.1371	14.2466	7.8028	0.644596	-0.867535	0.559327	0.941413	-1.2778	5.58191	1.19126	5.33432	6.44375	47.8986	2.28352	40.3451	87.0489	10.6535	2.13923	7.26453	10.6304	1.2212e-15	0.0363619	7.48382e-10	1.33306e-15	14.9132	1.43935	9.12588	14.8751	4.88482e-14	0.0660346	5.94077e-09
IL11	256	0.0438879	0.418718	0.462606	0.648914	0.0948711	0.905129	0.42523	138.873	142.873	143.077	143.032	8.63906	4	62	1.31384e-05	4.65746	4.77096	6.27394	5.36816	4.87148	-0.798765	-0.628016	1.63313	0.27044	-0.476787	-0.214018	-0.100521	1.40245	0.49668	-1.15991	-1.07216	2.64351	1.41096	-0.941539	-0.416428	4.40291	1.88882	0.350083	0.678535	4.29677e-05	0.0635959	0.455829	0.168428	4.36686	1.19657	0.466979	0.768481	0.000133408
PDCD2	257	0	0.379308	0.379308	0.456324	0	1	0.219151	128.442	130.442	130.509	130.522	4.3502	4	62	0.0036418	4.94833	5.05909	6.01135	5.44534	5.01392	-0.781136	-0.531995	1.60994	0.336798	-0.633609	-0.065587	0.0451754	0.997432	0.431421	-1.04651	1.03181	1.99644	1.34856	-0.305605	0.200433	3.31904	1.73858	0.760929	0.841798	0.00151572	0.087072	0.118656	0.0747922	2.81938	1.06012	0.824331	0.878894	0.00369628
CD47	258	0.034379	0.270506	0.304885	0.528462	0.11276	0.88724	0.546648	112.436	116.436	116.64	116.595	15.9029	4	62	5.2108e-09	11.1969	10.5395	10.7998	11.9023	10.452	0.369447	-0.740584	-0.30103	1.56053	-0.88836	0.744934	0.0875197	0.347845	1.45035	1.6759	1.06254	1.27266	2.73274	4.07405	0.450205	1.35736	6.85603	0.000133532	0.654133	0.179588	3.814e-09	3.87441	0.184334	0.745723	8.41862	0.000385815	0.750924	0.266312
CEACAM8	259	0.0309198	0.335819	0.366739	0.430358	0.0843101	0.91569	0.30228	124.793	128.793	128.996	128.952	3.97953	4	62	0.0061466	7.27075	7.69643	6.71494	7.40454	7.06058	0.112036	1.26666	-1.39559	0.474924	-0.458037	0.210169	0.635847	-0.345647	0.343956	1.15682	1.55385	-1.27072	1.26923	1.033	2.94517	-1.21245	1.46144	0.305616	0.00454029	0.229939	0.148946	0.514823	2.34292	0.638388	0.826972	0.418355	0.0101851	0.329861
TNFSF11	260	0	0.110558	0.110558	0.131517	0	1	0.21031	52.0081	54.0081	54.0748	54.0876	4.12795	4	62	0.00498145	4.79647	4.77965	4.74331	4.36072	4.84869	0.461392	0.375826	0.190964	-1.75522	0.727042	-0.0522215	-0.0690421	-0.105382	-0.487965	-1.03686	-1.04902	-1.07578	-1.40247	-0.450706	-0.56739	-0.649527	-3.64237	0.653774	0.572498	0.518397	0.00055322	0.184573	0.242226	0.285338	3.2571	0.750792	0.690551	0.641745
IRGM	261	0	0.124599	0.124599	0.124653	0	1	0.0610155	59.4209	61.4209	61.4875	61.5003	1.0072	4	62	0.410706	4.6588	4.77965	4.89849	4.6804	4.84869	-1.10166	0.0620382	1.20643	-0.893685	0.726877	-0.18989	-0.0690421	0.0498004	-0.168292	-1.14068	-1.04902	1.03512	-1.12373	-1.54377	-0.534466	0.289135	-1.1833	0.127733	0.594931	0.773443	0.241207	0.893698	0.225533	0.111572	0.617611	0.1973	0.708306	0.833521
S1PR1	262	0.0498128	0.156335	0.206148	0.241995	0.241637	0.758363	0.442441	82.4108	86.4108	86.6142	86.5697	6.4832	4	62	0.000200266	7.53787	7.8728	7.83251	7.34739	8.04907	-0.676205	0.515453	0.37208	-1.35392	1.14259	-0.511202	-0.176267	-0.216565	-0.701685	-1.42524	-1.12996	-1.16196	-1.6264	-3.66462	-1.18251	-1.10683	-4.34614	0.000515184	0.241518	0.272644	5.24073e-05	3.28804	0.617051	0.564404	4.28061	0.00135853	0.344865	0.380836
MBP	263	0.17966	0.285774	0.465434	0.521207	0.386006	0.613994	0.533495	123.525	127.525	127.728	127.683	6.65761	4	62	0.000159412	6.1472	5.77955	6.59262	6.2346	5.46271	0.238952	-0.606857	1.26365	0.440007	-1.33575	0.68449	0.316834	1.1299	0.771884	1.60713	1.24559	2.18844	1.7075	3.62252	1.56494	4.261	3.52874	0.000589406	0.122687	7.04374e-05	0.000793021	3.22959	0.911203	4.1522	3.10072	0.00153325	0.190942	0.000211244
FADD	264	0	0.142801	0.142801	0.267205	0	1	0.497967	67.8744	69.8744	69.9411	69.9539	15.3745	4	62	8.68005e-09	6.31613	6.16622	7.14004	6.75646	5.9141	-0.291503	-0.598251	1.39439	0.609509	-1.11414	0.402031	0.25212	1.22594	0.842364	1.32137	1.19096	2.33908	1.79299	3.05305	1.82308	6.64859	5.53255	0.00333466	0.0731134	8.69138e-09	6.75232e-07	2.47695	1.136	8.06091	6.17055	0.00764193	0.121988	5.47988e-08
GBP1	265	0.263262	1.8536	2.11686	5.43063	0.124364	0.875636	0.698706	232.166	236.166	236.369	236.324	31.8587	4	62	2.00636e-14	14.1637	10.864	13.3946	14.3086	9.76909	0.807648	-0.794188	0.434278	0.877979	-1.32572	4.39462	1.09492	3.6255	4.5395	21.0335	2.13602	12.3419	23.2554	9.17716	2.14921	5.40153	8.19346	3.69679e-13	0.0355288	1.11117e-06	1.82808e-11	12.4322	1.44942	5.95422	10.738	6.94715e-12	0.0647123	4.69466e-06
TNF	266	0.0687265	0.388221	0.456947	1.18287	0.150404	0.849596	0.712166	136.106	140.106	140.309	140.265	32.8055	4	62	1.09613e-14	5.87306	5.87554	7.21312	8.04421	5.60737	-0.614474	-0.612129	0.653126	1.43928	-0.865804	0.265696	0.268174	1.60575	2.43684	1.20222	1.20428	3.04354	5.41455	1.21129	1.14771	5.22185	9.60117	0.23038	0.255499	2.18702e-06	7.0193e-14	0.637555	0.592611	5.66015	13.1537	0.33034	0.361311	8.54824e-06
CTLA4	267	0.0581828	0.418011	0.476194	0.507214	0.122183	0.877817	0.27207	139.749	143.749	143.952	143.908	2.62309	4	62	0.0430933	5.08535	5.11079	5.93801	5.11729	5.44815	-0.69523	-0.625763	1.63341	-0.608006	0.295588	-0.362803	-0.337366	0.489863	-0.330864	-1.28592	-1.26345	1.40431	-1.25777	-1.59554	-1.39476	1.53703	-1.25766	0.115676	0.168065	0.129375	0.21323	0.936757	0.774524	0.888151	0.671151	0.181406	0.251403	0.199184
HDAC4	268	0.0692895	0.214347	0.283636	0.360427	0.24429	0.75571	0.48692	102.05	106.05	106.254	106.209	8.20631	4	62	2.23276e-05	6.66186	6.19886	6.50691	6.59227	5.80487	0.873246	-0.4356	0.435223	0.676518	-1.54939	0.856995	0.393997	0.702046	0.787403	1.81126	1.31403	1.62681	1.72596	5.24642	2.25708	3.06409	4.16491	1.99442e-06	0.0275368	0.00322974	9.80207e-05	5.70018	1.56009	2.49083	4.00868	7.90581e-06	0.0516211	0.00743468
IL4R	269	0.0112552	0.503076	0.514331	1.05947	0.0218833	0.978117	0.561672	147.118	151.118	151.321	151.277	19.0806	4	62	2.84627e-10	7.16195	6.18144	7.29043	8.11308	5.9709	0.249587	-0.870968	0.396413	1.33655	-1.11158	1.19106	0.210542	1.31953	2.14218	2.2832	1.15712	2.49586	4.41428	4.80575	0.805868	3.80174	7.47443	1.01767e-05	0.423399	0.000330477	3.23471e-10	4.99239	0.37325	3.48086	9.49016	3.47111e-05	0.546322	0.000901568
PSMB7	270	0.0104293	0.0779116	0.0883409	0.0916974	0.118058	0.881942	0.248646	35.4498	39.4498	39.6532	39.6087	1.71862	4	62	0.157217	8.34043	8.33968	8.39427	8.5896	8.3613	-0.612451	-0.61958	-0.102173	1.74889	-0.414686	-0.0208683	-0.0216206	0.0329766	0.228302	-1.01457	-1.0151	1.02312	1.17146	-0.212613	-0.207124	0.239713	2.01046	0.832326	0.836592	0.811344	0.0487376	0.0797064	0.0774865	0.090795	1.31214	0.871961	0.875536	0.857563
MASP1	271	0.00560566	0.0804733	0.0860789	0.118574	0.0651223	0.934878	0.388396	35.4489	39.4489	39.6522	39.6077	7.90919	4	62	3.2286e-05	4.56869	4.79388	4.57588	4.27124	4.84354	-0.184879	0.807456	-0.153193	-1.49568	1.0263	-0.274848	-0.0496615	-0.267658	-0.572304	-1.20987	-1.03502	-1.20385	-1.4869	-2.76277	-0.471183	-1.92046	-4.97354	0.00753369	0.639164	0.0594023	5.50479e-06	2.12299	0.194388	1.2262	5.25926	0.0160136	0.740362	0.101644
CHUK	272	0	0.0820425	0.0820425	0.0850907	0	1	0.0942584	33.5133	35.5133	35.5799	35.5927	1.61305	4	62	0.182239	7.55713	7.54849	7.6563	7.72546	7.44805	-0.280388	-0.361246	0.647845	1.29519	-1.3014	0.109081	0.100443	0.20825	0.27741	1.07854	1.0721	1.15529	1.21202	1.09288	0.958215	1.49002	2.40377	0.278677	0.341676	0.14129	0.0192299	0.554899	0.466385	0.849888	1.71602	0.388206	0.457947	0.215446
FCGR2A	273	0.340493	0.657865	0.998359	1.44907	0.341053	0.658947	0.612355	174.102	178.102	178.306	178.261	16.4278	4	62	3.16396e-09	12.4456	11.0333	11.5731	12.5152	10.5204	0.950108	-0.67033	-0.0509171	1.02994	-1.2588	1.92522	0.512894	1.05276	1.9948	3.79794	1.42691	2.07449	3.9856	6.71839	1.67158	2.61818	6.01359	6.58974e-09	0.0996484	0.0110955	1.05582e-07	8.18113	1.00153	1.95485	6.97641	4.26395e-08	0.159686	0.0226618
PLA2G2E	274	0.0111542	0.315261	0.326416	0.360182	0.0341716	0.965828	0.198443	118.741	122.741	122.945	122.9	2.82344	4	62	0.0322664	4.66946	4.77498	5.53803	4.85385	4.85647	-0.783	-0.47596	1.7443	-0.246481	-0.238854	-0.18701	-0.0814874	0.681561	-0.0026212	-1.1384	-1.05811	1.60387	-1.00182	-0.952016	-0.392857	2.47728	-0.0115383	0.344786	0.695772	0.0159786	0.990831	0.462451	0.157533	1.79646	0.00400041	0.461312	0.782109	0.031507
MMP3	275	0.00892959	0.158567	0.167497	0.171612	0.0533121	0.946688	0.162696	76.9996	80.9996	81.203	81.1585	1.64951	4	62	0.1732	4.5741	4.78158	4.84333	4.8925	4.85501	-1.69792	-0.0609431	0.42625	0.814192	0.51842	-0.280911	-0.0734317	-0.0116821	0.0374878	-1.21496	-1.05222	-1.00813	1.02633	-2.01323	-0.497306	-0.0597674	0.232289	0.0484368	0.620732	0.952533	0.817078	1.31482	0.207096	0.0211199	0.0877364	0.0852487	0.72558	0.963165
MAX	276	0.0466229	0.117844	0.164466	0.271214	0.28348	0.71652	0.626906	66.0095	70.0095	70.2129	70.1684	18.7346	4	62	3.85714e-10	10.341	9.88103	10.0857	10.6355	9.56575	0.580775	-0.536035	-0.0391824	1.29603	-1.30159	0.775227	0.315284	0.519905	1.0698	1.71146	1.24426	1.43386	2.09914	6.39657	2.43217	3.05788	7.62622	2.3534e-08	0.0179095	0.00328838	1.76308e-10	7.62831	1.74692	2.48302	9.75373	1.35739e-07	0.0350007	0.00754709
LTA	277	0	0.261833	0.261833	0.30209	0	1	0.185792	105.462	107.462	107.529	107.542	3.53691	4	62	0.0115535	4.6657	4.77965	5.37021	4.43288	4.84869	-0.444302	-0.114964	1.59188	-1.1172	0.0845825	-0.182992	-0.0690421	0.521519	-0.415811	-1.13524	-1.04902	1.43547	-1.33405	-1.02626	-0.368693	2.08873	-2.01685	0.308755	0.713613	0.0408441	0.0480467	0.510385	0.146538	1.38887	1.31834	0.422464	0.793536	0.0731394
MAP2K4	278	0.0568154	0.139357	0.196172	0.424372	0.28962	0.71038	0.718223	76.5661	80.5661	80.7695	80.725	26.9909	4	62	5.4816e-13	9.35927	9.2806	7.71077	9.00244	9.4907	0.53821	0.429786	-1.73378	0.0464286	0.719354	-0.131434	-0.210103	-1.77993	-0.488258	-1.09538	-1.15677	-3.4341	-1.40275	-0.997188	-1.49012	-9.62588	-3.2004	0.322549	0.141263	6.37457e-14	0.00216474	0.491404	0.849973	13.1955	2.66459	0.437837	0.215446	1.53388e-12
GATA3	279	0.044696	0.283761	0.328457	0.403339	0.136079	0.863921	0.380875	116.203	120.203	120.406	120.362	5.67371	4	62	0.000588	4.64378	4.84101	5.81485	5.017	4.89513	-0.881132	-0.445115	1.70775	-0.056044	-0.32546	-0.251356	-0.0541257	0.919714	0.121869	-1.19033	-1.03823	1.89174	1.08814	-1.34098	-0.271257	3.50034	0.561927	0.184819	0.787094	0.000866837	0.576191	0.733254	0.103973	3.06206	0.239433	0.273018	0.841462	0.00219741
IKZF1	280	0.0014029	0.0832019	0.0846048	0.0944298	0.0165818	0.983418	0.183543	35.2809	39.2809	39.4843	39.4398	2.92279	4	62	0.0279548	9.09947	8.93908	8.77302	9.15027	8.89244	0.834439	-0.206174	-1.28353	1.16401	-0.508745	0.207034	0.0466375	-0.119423	0.257834	1.15431	1.03285	-1.0863	1.19568	2.05531	0.43956	-0.84659	2.21352	0.0440676	0.661784	0.400479	0.0305502	1.35588	0.179283	0.39742	1.51499	0.078365	0.756045	0.520906
PLAU	281	0.116872	0.858823	0.975695	2.31683	0.119783	0.880217	0.672361	184.309	188.309	188.513	188.468	28.2152	4	62	2.30704e-13	5.87234	5.17668	7.0748	8.35218	4.82382	-0.267045	-0.746313	0.561372	1.4414	-0.989412	1.04853	0.352862	2.25099	3.52836	2.06842	1.27709	4.76009	11.5383	3.21737	1.01799	4.928	9.3578	0.00205811	0.312638	6.50882e-06	1.81829e-13	2.68653	0.504959	5.1865	12.7403	0.00490254	0.42662	2.29899e-05
CRADD	282	0.0428372	0.438969	0.481806	1.65469	0.0889097	0.91109	0.763196	141.577	145.577	145.78	145.735	45.3476	4	62	9.34993e-18	4.81913	4.86058	7.57314	7.26701	4.92956	-0.763946	-0.73437	1.20095	0.982531	-0.685161	-0.110426	-0.0689721	2.64359	2.33746	-1.07955	-1.04897	6.24884	5.05411	-0.474607	-0.279263	8.10849	8.68445	0.636735	0.780973	2.56592e-11	2.59114e-12	0.196042	0.107364	10.5908	11.5865	0.738938	0.838922	2.82251e-10
PLA2G2A	283	0.135476	0.737369	0.872845	1.2754	0.155212	0.844788	0.493512	176.034	180.034	180.237	180.193	10.9329	4	62	9.00235e-07	4.75964	4.79516	6.69812	6.20045	4.84362	-0.759705	-0.721141	1.34484	0.804533	-0.668529	-0.0839819	-0.0484608	1.8545	1.35683	-1.05994	-1.03416	3.61626	2.56121	-0.277768	-0.150434	4.37512	3.87834	0.782114	0.880911	4.73609e-05	0.000256935	0.10673	0.055068	4.32458	3.59018	0.839342	0.910272	0.000146311
TARP	284	0.0408193	0.335147	0.375966	1.08962	0.108572	0.891428	0.727238	125.572	129.572	129.775	129.731	36.4574	4	62	1.18093e-15	6.46493	7.30523	4.9673	5.49583	7.53083	0.100659	0.855159	-1.24406	-0.769487	1.05773	-1.0659	-0.225601	-2.56353	-2.035	-2.09348	-1.16926	-5.91154	-4.09822	-5.23811	-1.04305	-8.98899	-8.64412	2.05763e-06	0.300976	7.76202e-13	3.04089e-12	5.68663	0.521468	12.11	11.517	8.125e-06	0.413842	1.33559e-11
LTBR	285	0.00699077	0.294974	0.301965	0.747243	0.0231509	0.976849	0.635921	114.083	118.083	118.286	118.241	26.1812	4	62	9.84664e-13	6.08042	5.28516	6.27285	6.89349	4.92258	0.240137	-0.767505	0.483949	1.27033	-1.22691	1.15784	0.362581	1.35027	1.97091	2.23124	1.28572	2.54959	3.92014	6.1002	1.81182	5.07976	8.97948	7.531e-08	0.0748581	3.71605e-06	8.05906e-13	7.12315	1.12576	5.42992	12.0937	3.93811e-07	0.124561	1.37565e-05
CFP	286	0.0140598	0.21536	0.22942	0.369773	0.0612842	0.938716	0.474235	96.3207	100.321	100.524	100.48	11.997	4	62	2.78328e-07	9.54194	9.43356	9.88668	10.3274	9.08936	-0.241688	-0.471765	0.490162	1.42577	-1.20248	0.452579	0.344201	0.797316	1.23803	1.36848	1.26945	1.73787	2.35877	2.78163	1.99752	3.49803	6.57858	0.00715597	0.0501617	0.000873133	1.14681e-08	2.14533	1.29963	3.05892	7.94051	0.015274	0.0878329	0.00220792
IL18	287	0.077901	0.251545	0.329446	0.927113	0.236461	0.763539	0.765668	111.757	115.757	115.96	115.915	41.7839	4	62	5.9485e-17	6.94007	6.72152	8.01359	8.86198	6.69962	-0.52996	-0.758278	0.591541	1.47785	-0.781152	0.240445	0.0218948	1.31396	2.16235	1.18136	1.01529	2.48624	4.47645	1.35898	0.115823	5.29479	10.5598	0.179077	0.908167	1.66285e-06	1.74371e-15	0.746961	0.0418342	5.77915	14.7585	0.26581	0.930524	6.71243e-06
TLR9	288	0.0691264	0.534527	0.603653	0.939135	0.114514	0.885486	0.496165	154.725	158.725	158.929	158.884	11.6574	4	62	4.02981e-07	4.69562	4.76664	6.71585	5.69268	4.87904	-0.758958	-0.676588	1.58425	0.397506	-0.546212	-0.183422	-0.112405	1.83681	0.81364	-1.13557	-1.08103	3.57219	1.75764	-0.713561	-0.411262	5.09846	2.73591	0.478176	0.682298	3.46654e-06	0.00810322	0.320412	0.166026	5.4601	2.09134	0.602491	0.770902	1.28949e-05
IFIH1	289	0.233496	1.00056	1.23405	4.19679	0.189211	0.810789	0.792551	196.005	200.005	200.208	200.163	53.0339	4	62	2.42635e-19	11.0606	8.00456	10.3156	11.7564	7.18572	0.705805	-0.839267	0.329136	1.05758	-1.25326	3.87487	0.818843	3.12985	4.57067	14.6708	1.76399	8.75346	23.7633	10.992	2.17721	6.33166	11.2041	3.40156e-16	0.0332801	3.03881e-08	1.53682e-16	15.4683	1.47782	7.5173	15.8134	1.77193e-14	0.0611226	1.7142e-07
IL26	290	0.0308858	0.374411	0.405296	0.524906	0.0762055	0.923794	0.360211	131.219	135.219	135.423	135.378	6.46733	4	62	0.000204481	4.67637	4.77726	5.98388	5.29231	4.86116	-0.821427	-0.633852	1.60945	0.323705	-0.477878	-0.184787	-0.0838949	1.12273	0.431154	-1.13665	-1.05988	2.17758	1.34831	-0.860557	-0.368423	3.73176	1.73581	0.392798	0.713813	0.000414971	0.0875653	0.405831	0.146415	3.38198	1.05767	0.512598	0.793536	0.00111821
MARCO	291	0.0207588	0.217796	0.238555	0.518024	0.0870189	0.912981	0.624449	98.0504	102.05	102.254	102.209	22.4184	4	62	1.74626e-11	4.84739	4.79744	5.49094	6.2688	4.82732	-0.622829	-0.7008	0.381768	1.59602	-0.654162	0.020072	-0.0298772	0.663623	1.44148	1.01401	-1.02093	1.58406	2.716	0.122486	-0.171781	2.89008	7.60408	0.90291	0.864169	0.00530162	1.92626e-10	0.0443556	0.0634011	2.27559	9.71529	0.92637	0.89678	0.0117222
CD36	292	0.140421	0.427634	0.568055	0.605938	0.247195	0.752805	0.391354	144.952	148.952	149.155	149.111	2.41997	4	62	0.057768	6.17073	5.8562	6.08932	6.59577	5.91587	0.154657	-0.922639	-0.124199	1.61044	-0.718255	0.254862	-0.0596732	0.173445	0.679901	1.19322	-1.04223	1.12775	1.60203	1.10456	-0.241992	0.53591	2.54596	0.273618	0.809585	0.593938	0.0133973	0.562855	0.0917375	0.226259	1.87298	0.382024	0.856586	0.707397
KLRD1	293	0.144235	0.348788	0.493023	0.895971	0.292552	0.707448	0.666063	133.523	137.523	137.726	137.682	21.2154	4	62	4.64245e-11	7.23768	7.8894	6.30055	6.37123	8.12629	0.0626026	0.837489	-1.05164	-0.967596	1.11915	-0.888607	-0.23689	-1.82574	-1.75505	-1.85139	-1.17845	-3.54489	-3.37539	-4.26132	-1.06188	-6.24075	-7.27124	7.03594e-05	0.292409	4.34349e-08	7.28593e-10	4.15268	0.534009	7.36216	9.13751	0.000211215	0.404228	2.38042e-07
TLR8	294	0.0904394	0.297793	0.388232	0.489189	0.232952	0.767048	0.473984	122.123	126.123	126.327	126.282	7.32776	4	62	6.72013e-05	9.1512	8.84144	8.38984	8.36483	8.26538	1.44896	0.630922	-0.561712	-0.627763	-0.890411	0.885821	0.576063	0.124464	0.0994537	1.84782	1.49078	1.0901	1.07137	4.60174	2.8012	0.460994	0.446407	2.12439e-05	0.00678238	0.646416	0.656858	4.67277	2.16862	0.189488	0.182528	6.84426e-05	0.0145168	0.746797
NFATC4	295	0.0186759	0.101963	0.120639	0.131639	0.154807	0.845193	0.321385	53.3555	57.3555	57.5589	57.5144	3.36381	4	62	0.0148097	4.65451	4.83918	4.81885	4.44259	4.83281	-0.367401	0.708194	0.589778	-1.60165	0.671081	-0.1783	0.00637205	-0.0139592	-0.390212	-1.13155	1.00443	-1.00972	-1.31059	-1.58589	0.0531944	-0.0885626	-2.9995	0.117851	0.957748	0.929715	0.00388995	0.928666	0.0187487	0.0316502	2.41006	0.184348	0.966587	0.948357
CLEC4E	296	0.332709	0.690262	1.02297	1.48921	0.325238	0.674762	0.603671	176.684	180.684	180.887	180.843	15.1683	4	62	1.06162e-08	8.34925	8.04374	9.09587	9.95091	7.49344	-0.247947	-0.567039	0.531866	1.42492	-1.1418	0.855809	0.550299	1.60243	2.45747	1.80977	1.46439	3.03655	5.49255	2.9161	1.75167	3.89148	7.23394	0.00492835	0.0847754	0.00024601	8.45625e-10	2.3073	1.07173	3.60905	9.07282	0.0109519	0.138445	0.000686333
CXCL11	297	0.00293096	0.773152	0.776083	2.36292	0.00377661	0.996223	0.693665	172.806	176.806	177.01	176.965	34.8776	4	62	3.03648e-15	5.84605	4.83624	7.04706	8.39186	4.91172	-0.238164	-0.905239	0.555209	1.44357	-0.855376	0.934334	-0.0754817	2.13534	3.48014	1.91101	-1.05371	4.39341	11.159	3.04772	-0.234272	4.97416	9.81773	0.00338643	0.815545	5.49225e-06	3.02241e-14	2.47026	0.0885518	5.26025	13.5196	0.00774536	0.860233	1.9785e-05
LAIR2	298	0.124834	0.805461	0.930295	1.86106	0.134188	0.865812	0.618945	180.823	184.823	185.027	184.982	20.4556	4	62	8.74755e-11	4.67094	4.79033	7.56422	6.70425	4.88329	-0.793019	-0.702988	1.38869	0.740217	-0.632896	-0.212348	-0.0929525	2.68094	1.82096	-1.15857	-1.06655	6.41273	3.53317	-0.672458	-0.276543	6.05666	4.98396	0.503791	0.783051	8.92629e-08	5.29732e-06	0.29775	0.10621	7.04933	5.27594	0.62618	0.83976	4.56694e-07
SIGIRR	299	0.110915	0.416671	0.527586	0.607112	0.210231	0.789769	0.404942	142.307	146.307	146.51	146.466	4.98162	4	62	0.00151163	6.4726	6.74297	7.66754	7.14802	7.02547	-1.19587	-0.595691	1.4567	0.303449	0.0314083	-0.552869	-0.282498	0.642073	0.12255	-1.467	-1.2163	1.56057	1.08866	-2.42916	-1.16261	2.01161	0.46527	0.0180454	0.249444	0.0486127	0.643368	1.74363	0.603026	1.31325	0.19154	0.0352218	0.354377	0.0854608
BATF	300	0.0371126	0.680179	0.717291	2.34463	0.05174	0.94826	0.736907	167.214	171.214	171.418	171.373	41.1861	4	62	8.2038e-17	6.98781	5.62594	7.87827	9.08822	5.43757	-0.0102405	-0.895746	0.568745	1.35547	-1.01822	1.55024	0.188366	2.4407	3.65065	2.92866	1.13947	5.42905	12.559	5.365	0.61611	6.0299	10.9234	1.27587e-06	0.540077	9.90832e-08	4.4018e-16	5.89419	0.267544	7.004	15.3564	5.32478e-06	0.660619	4.98654e-07
CFL1	301	0.00281617	0.0799581	0.0827743	0.17867	0.0340223	0.965978	0.59014	33.6765	37.6765	37.8798	37.8353	20.9599	4	62	5.73668e-11	10.9349	10.6906	11.1859	11.4504	10.5028	-0.0475682	-0.692857	0.615257	1.31385	-1.18868	0.432068	0.187737	0.68304	0.947552	1.34917	1.13898	1.60552	1.9286	4.36759	1.79727	4.92977	8.28239	4.8625e-05	0.0771631	6.46657e-06	1.2823e-11	4.31314	1.11259	5.18933	10.892	0.000149765	0.127775	2.28931e-05
CD6	302	0.0796148	0.245697	0.325312	0.741042	0.244733	0.755267	0.713965	110.526	114.526	114.729	114.685	31.8511	4	62	2.01628e-14	7.0298	7.73063	6.19886	6.0948	7.94366	0.0356046	0.860629	-0.94257	-1.06507	1.11141	-0.913869	-0.213032	-1.7448	-1.84887	-1.88409	-1.15912	-3.35149	-3.60217	-5.22545	-1.13985	-7.11274	-9.13416	2.15765e-06	0.258732	1.37171e-09	4.37882e-13	5.66602	0.587149	8.86274	12.3586	8.44418e-06	0.365262	1.01316e-08
IL4	303	0	0.293988	0.293988	0.468435	0	1	0.41044	112.644	114.644	114.711	114.723	10.7908	4	62	1.05641e-06	4.85962	4.77965	6.06936	5.65629	4.84869	-0.654406	-0.791022	1.41206	0.706448	-0.673084	0.0109346	-0.0690421	1.22067	0.807596	1.00761	-1.04902	2.33055	1.75029	0.0578731	-0.347947	4.6138	3.69675	0.954036	0.729059	2.03467e-05	0.000464644	0.0204353	0.137237	4.69151	3.33288	0.963736	0.802538	6.57584e-05
TRAF4	304	0.00102822	0.32951	0.330538	0.43453	0.00311076	0.996889	0.289632	119.891	123.891	124.095	124.05	6.21253	4	62	0.000286135	5.53506	5.49519	6.7748	5.76992	5.70412	-0.609485	-0.685242	1.74621	-0.163227	-0.288253	-0.169056	-0.208925	1.07068	0.0657983	-1.12432	-1.15583	2.10043	1.04666	-0.844776	-0.99349	3.82079	0.28436	0.401484	0.324333	0.000310498	0.777082	0.396332	0.489009	3.50794	0.109533	0.52176	0.439483	0.00085083
CD8A	305	0.0499329	0.261779	0.311712	0.316159	0.160189	0.839811	0.275414	111.985	115.985	116.189	116.144	1.60964	4	62	0.183107	6.03711	6.10808	6.55075	6.27667	6.32958	-1.10832	-0.756106	1.44073	0.0805631	0.343128	-0.292469	-0.221498	0.221169	-0.0529073	-1.22473	-1.16594	1.16568	-1.03735	-1.62326	-1.15356	0.875558	-0.25377	0.109609	0.253107	0.38465	0.800513	0.960154	0.596695	0.414935	0.0966318	0.173037	0.358753	0.504137
IKBKAP	306	0.00924892	0.147282	0.156531	0.35191	0.0590869	0.940913	0.621798	72.67	76.67	76.8734	76.8289	23.2727	4	62	8.87989e-12	6.39935	6.76829	5.73321	5.69783	6.90972	0.172338	0.823321	-1.00305	-1.06549	1.07288	-0.510371	-0.141434	-1.17651	-1.21189	-1.42442	-1.103	-2.26029	-2.31641	-3.79371	-0.992883	-6.24267	-7.78832	0.000339262	0.324626	4.31093e-08	9.22134e-11	3.46947	0.488616	7.36543	10.0352	0.000924713	0.439687	2.36678e-07
CXCR1	307	0.19403	0.663578	0.857608	1.19578	0.226246	0.773754	0.520022	171.613	175.613	175.817	175.772	11.3493	4	62	5.65833e-07	9.67501	8.54416	8.58986	9.31688	7.88015	1.2393	-0.364569	-0.299757	0.731356	-1.30633	1.79487	0.664016	0.709713	1.43673	3.46984	1.58449	1.63548	2.70707	6.24706	2.16371	1.76123	4.32075	4.23725e-08	0.0343482	0.0831308	5.72555e-05	7.37292	1.4641	1.08024	4.24218	2.33049e-07	0.0628496	0.136193
C9	308	0.0206806	0.201694	0.222375	0.223695	0.092999	0.907001	0.196331	93.5153	97.5153	97.7187	97.6742	1.35453	4	62	0.260051	4.72201	4.82215	5.0784	4.9852	4.9969	-1.37246	-0.681577	1.08649	0.443392	0.52416	-0.274888	-0.174754	0.0815014	-0.0117061	-1.2099	-1.12877	1.05812	-1.00815	-1.7426	-1.04333	0.368703	-0.0641482	0.0863611	0.300848	0.713605	0.949059	1.06368	0.521653	0.146542	0.022707	0.140662	0.413842	0.793536
TRAF1	309	0	0.504956	0.504956	0.814351	0	1	0.417509	146.182	148.182	148.248	148.261	11.1099	4	62	7.38432e-07	5.85422	6.33547	7.38874	7.40043	6.52444	-1.24665	-0.537857	1.01342	1.03063	-0.259541	-0.670222	-0.18897	0.864305	0.875994	-1.59132	-1.13995	1.82046	1.83527	-2.70665	-0.726656	2.49267	3.0596	0.00876863	0.470172	0.015364	0.00327205	2.05707	0.327744	1.8135	2.48518	0.0184351	0.595203	0.0304904
RHOA	310	0	0.115512	0.115512	0.196738	0	1	0.448448	54.7256	56.7256	56.7923	56.8051	12.6025	4	62	1.45351e-07	9.43333	9.29996	9.99377	9.94837	9.17946	-0.36565	-0.719923	1.12309	1.00251	-1.04003	0.253871	0.120504	0.814312	0.768918	1.1924	1.08711	1.75846	1.70399	2.14358	0.968839	4.91024	5.6151	0.0359969	0.33639	6.94731e-06	4.92491e-07	1.44373	0.473157	5.15818	6.3076	0.0654876	0.452042	2.4371e-05
CEACAM1	311	0.263156	0.590014	0.853169	1.05166	0.308445	0.691555	0.519523	166.526	170.526	170.729	170.685	7.82409	4	62	3.59089e-05	7.62208	8.17915	8.75986	9.10822	7.86353	-1.10706	-0.206079	0.733135	1.29655	-0.716547	-0.24145	0.315621	0.896335	1.24469	-1.18218	1.24455	1.86133	2.36968	-0.890061	1.08722	2.35504	3.96392	0.376874	0.281147	0.0217002	0.000193367	0.423804	0.551067	1.66354	3.71362	0.49648	0.391117	0.0417468
DEFB1	312	0	0.551877	0.551877	0.676223	0	1	0.233345	151.691	153.691	153.757	153.77	4.71771	4	62	0.00217865	5.77216	5.0543	6.09236	5.52444	4.96004	0.609839	-0.891985	1.27974	0.091596	-1.08919	0.81212	0.0942625	1.13233	0.564405	1.75579	1.06752	2.19212	1.47878	3.13718	0.346722	3.12374	1.88565	0.00260949	0.729974	0.00271439	0.0640297	2.58344	0.136692	2.56633	1.19362	0.00611661	0.803258	0.00634937
ITLN1	313	0.0591185	0.339989	0.399107	0.387988	0.148127	0.851873	0.231091	127.807	131.807	132.011	131.966	0.943993	4	62	0.444672	5.52032	5.42457	5.05361	5.53174	5.31443	0.769244	0.282706	-1.60226	0.827276	-0.276964	0.205891	0.110142	-0.260816	0.217312	1.1534	1.07933	-1.19816	1.16257	1.00309	0.50379	-0.906409	0.915001	0.319715	0.616195	0.368228	0.363736	0.495236	0.210282	0.433883	0.439214	0.434756	0.721798	0.486339
C4B	314	0.0351924	0.644319	0.679511	1.05429	0.0517908	0.948209	0.445769	163.858	167.858	168.062	168.017	10.7187	4	62	1.14613e-06	4.8463	4.8316	6.7245	6.07416	4.94744	-0.736382	-0.753333	1.42974	0.679703	-0.619731	-0.101145	-0.115843	1.77706	1.12671	-1.07262	-1.08361	3.42727	2.18361	-0.359647	-0.3893	4.51083	3.46387	0.720333	0.698388	2.93639e-05	0.000971251	0.142467	0.155903	4.53219	3.01267	0.796634	0.783366	9.38181e-05
KLRC3	315	0.617569	0.351145	0.968714	1.52004	0.637514	0.362486	0.805874	142.713	146.713	146.916	146.871	31.8709	4	62	1.99074e-14	7.0546	8.06675	5.79488	6.2251	8.13467	-0.000567731	0.957324	-1.19276	-0.785605	1.02161	-1.08007	-0.0679236	-2.33979	-1.90958	-2.11414	-1.04821	-5.0623	-3.75698	-5.1485	-0.30149	-7.94349	-7.86131	2.87712e-06	0.764049	4.95961e-11	6.88779e-11	5.54104	0.116879	10.3046	10.1619	1.09267e-05	0.82658	5.21351e-10
CD1E	316	0.00714932	0.0751554	0.0823048	0.110009	0.086864	0.913136	0.389725	32.0764	36.0764	36.2798	36.2353	7.4252	4	62	5.937e-05	4.5657	4.79703	4.4915	4.32909	4.84225	-0.183893	0.895499	-0.530129	-1.28798	1.1065	-0.276545	-0.0452198	-0.350747	-0.513162	-1.21129	-1.03184	-1.27522	-1.42718	-2.87284	-0.442605	-2.60035	-4.6083	0.00556306	0.659592	0.0116277	2.07512e-05	2.25469	0.180725	1.93451	4.68296	0.0122434	0.754659	0.023646
FN1	317	0.294953	0.328376	0.623329	1.02548	0.47319	0.52681	0.729025	134.282	138.282	138.485	138.441	23.6698	4	62	6.51579e-12	9.65799	9.45777	7.69313	8.08459	8.90591	1.05315	0.818374	-1.2509	-0.791869	0.17124	0.752081	0.551865	-1.21278	-0.821323	1.68422	1.46598	-2.31783	-1.76703	3.7105	2.53854	-4.26267	-3.49998	0.000444485	0.0136566	7.00331e-05	0.000867834	3.35214	1.86466	4.1547	3.06156	0.00118632	0.0274201	0.000210441
SH2D1A	318	0.0530484	0.25368	0.306729	1.00056	0.172949	0.827051	0.778711	110.434	114.434	114.637	114.593	48.6581	4	62	1.84008e-18	5.82948	6.51959	4.6395	4.39127	6.73822	0.192509	0.837816	-0.92023	-1.15234	1.04225	-0.908733	-0.218625	-2.09872	-2.34695	-1.8774	-1.16362	-4.2833	-5.08748	-5.12167	-1.15563	-8.43623	-11.4309	3.17969e-06	0.252268	6.94812e-12	6.61236e-17	5.49762	0.598138	11.1581	16.1796	1.19578e-05	0.357728	9.14539e-11
TNFSF4	319	0.0248166	0.207312	0.232129	0.252284	0.106909	0.893091	0.27091	95.7308	99.7308	99.9342	99.8896	2.72593	4	62	0.0371458	4.7378	4.84338	5.38762	5.05583	4.86231	-0.934278	-0.522581	1.59972	0.305882	-0.448742	-0.124512	-0.0189356	0.525313	0.193518	-1.09014	-1.01321	1.43925	1.14355	-0.778047	-0.111333	2.34224	1.04524	0.439501	0.911712	0.0223943	0.299969	0.357041	0.0401423	1.64986	0.522924	0.562619	0.933535	0.0429479
LILRB5	320	0.0139357	0.491067	0.505002	0.672761	0.0275953	0.972405	0.328784	145.903	149.903	150.106	150.061	6.70397	4	62	0.000150065	4.71611	4.81824	6.19716	5.44749	4.8486	-0.783992	-0.620381	1.58851	0.387608	-0.571742	-0.132499	-0.0303635	1.34856	0.598884	-1.09619	-1.02127	2.54657	1.51454	-0.540792	-0.117466	3.93008	2.11368	0.590588	0.90687	0.000216449	0.0385728	0.228715	0.0424548	3.66465	1.41372	0.70477	0.929812	0.00060938
ITGAE	321	0.0876328	0.567007	0.65464	1.23113	0.133864	0.866136	0.59447	159.048	163.048	163.251	163.207	18.2322	4	62	6.02905e-10	4.61962	4.79759	6.85055	6.35963	4.87617	-0.85776	-0.684503	1.3141	0.836174	-0.608006	-0.256547	-0.0785773	1.97438	1.48346	-1.19462	-1.05598	3.92958	2.79618	-0.968314	-0.278637	5.31632	4.83929	0.33665	0.781451	1.5333e-06	9.00618e-06	0.472821	0.107099	5.81437	5.04546	0.452194	0.838922	6.23854e-06
MASP2	322	0.000826639	0.123599	0.124426	0.143497	0.00664361	0.993356	0.195564	59.2915	63.2915	63.4949	63.4504	3.5879	4	62	0.0107401	4.58008	4.7813	4.96723	5.03478	4.84823	-1.48246	-0.34496	0.706102	1.08794	0.0333789	-0.268145	-0.0669265	0.119002	0.186547	-1.20426	-1.04748	1.08598	1.13804	-2.18674	-0.519042	0.693034	1.31568	0.0325434	0.605579	0.490876	0.193126	1.48754	0.217829	0.309028	0.71416	0.0599	0.71308	0.613845
HLA-DRA	323	0.065962	0.312379	0.378341	1.68409	0.174345	0.825655	0.838149	123.382	127.382	127.585	127.54	71.1886	4	62	1.76201e-22	10.985	11.5812	8.57337	8.84277	11.607	0.446693	0.845902	-1.16806	-0.987682	0.86315	-0.621983	-0.0257603	-3.03364	-2.76424	-1.53899	-1.01802	-8.18873	-6.79389	-3.15894	-0.122696	-10.9885	-12.1321	0.00244757	0.902745	3.44565e-16	5.06975e-18	2.61127	0.044435	15.4627	17.295	0.00575898	0.92637	1.77193e-14
IL17B	324	0.069815	0.609466	0.679281	1.62097	0.102778	0.897222	0.665965	162.439	166.439	166.642	166.598	26.7991	4	62	6.29131e-13	4.68433	4.79431	7.56949	6.68421	4.86961	-0.783022	-0.6999	1.39749	0.728424	-0.642991	-0.185284	-0.0753007	2.69988	1.8146	-1.13704	-1.05358	6.49747	3.51762	-0.675383	-0.25833	7.02248	5.71745	0.501944	0.797008	1.96591e-09	3.3243e-07	0.299345	0.0985375	8.70644	6.4783	0.624389	0.847939	1.39839e-08
C4BPA	325	0.0128905	0.119255	0.132145	0.137147	0.097548	0.902452	0.226159	61.1047	65.1047	65.3081	65.2636	2.0293	4	62	0.101222	4.5648	4.79338	4.68669	4.564	4.84431	-0.979204	0.799535	-0.0306693	-0.985436	1.19577	-0.279508	-0.050921	-0.157611	-0.280309	-1.21378	-1.03593	-1.11544	-1.21446	-2.30383	-0.395155	-0.927034	-1.99716	0.0245974	0.694085	0.357504	0.0502017	1.60911	0.158587	0.44672	1.29928	0.0466215	0.780497	0.474412
CD209	326	0	0.350476	0.350476	0.605283	0	1	0.456065	123.541	125.541	125.607	125.62	12.9961	4	62	9.59448e-08	4.97759	4.77965	5.85476	6.16016	4.84869	-0.544072	-0.854816	0.832947	1.31237	-0.74643	0.128903	-0.0690421	1.00607	1.31147	1.09346	-1.04902	2.00844	2.48194	0.624849	-0.318675	3.48277	5.49818	0.534363	0.751044	0.000915737	7.69731e-07	0.272163	0.124335	3.03823	6.11366	0.655974	0.81707	0.00230431
TGFBI	327	0.176685	0.380828	0.557514	1.41383	0.316917	0.683083	0.769502	139.599	143.599	143.803	143.758	41.588	4	62	6.60671e-17	7.61161	7.38397	5.14568	5.17995	6.97572	0.955896	0.767041	-1.08986	-1.06143	0.428352	0.635896	0.408251	-1.83004	-1.79577	1.5539	1.32708	-3.55547	-3.472	2.91742	1.74998	-5.98405	-7.11751	0.00491015	0.0850698	1.1845e-07	1.34588e-09	2.30891	1.07022	6.92646	8.87099	0.0109193	0.138853	5.87481e-07
SELE	328	0.0099241	0.331006	0.34093	0.412123	0.0291089	0.970891	0.262154	121.521	125.521	125.724	125.679	4.6469	4	62	0.00240432	4.65988	4.78087	5.77303	5.03536	4.8506	-0.813908	-0.540416	1.70228	0.0348355	-0.382792	-0.190724	-0.0697322	0.922427	0.184757	-1.14134	-1.04952	1.8953	1.13663	-0.948004	-0.328467	3.27376	0.79411	0.346808	0.743665	0.00173811	0.43016	0.459911	0.128623	2.75992	0.36637	0.463816	0.813617	0.00417906
CD8B	329	0.376655	0.372516	0.749171	0.765579	0.502762	0.497238	0.588866	142.835	146.835	147.038	146.993	5.7156	4	62	0.000555718	6.111	6.60937	6.87886	5.93543	6.83546	-0.847048	0.315802	0.944601	-1.2567	0.84334	-0.724467	-0.226092	0.0433983	-0.900034	-1.65229	-1.16966	1.03054	-1.86611	-3.35518	-0.97599	0.143178	-3.60021	0.00135774	0.332862	0.886614	0.000632746	2.86718	0.477736	0.0522654	3.19877	0.00333481	0.447692	0.913607
MAFG	330	0.0580621	0.38591	0.443973	2.06623	0.130779	0.869221	0.835414	135.089	139.089	139.292	139.247	70.5058	4	62	2.24774e-22	5.85839	5.35386	8.53901	8.33009	5.19256	-0.484182	-0.790922	1.14556	1.01854	-0.888988	0.665833	0.161301	3.34645	3.13753	1.58648	1.1183	10.1715	8.80016	3.04659	0.693501	10.9238	12.4079	0.0033975	0.490585	4.39529e-16	1.87763e-18	2.46884	0.309286	15.357	17.7264	0.00776283	0.613783	2.02352e-14
CTSG	331	0.00267347	0.0835679	0.0862414	0.1132	0.0309999	0.969	0.322628	36.2702	40.2702	40.4736	40.4291	6.44403	4	62	0.000210834	4.57473	4.81933	4.63913	4.33806	4.8446	-0.332571	0.856021	-0.0196374	-1.48262	0.97881	-0.269873	-0.0252691	-0.205473	-0.506545	-1.2057	-1.01767	-1.15306	-1.42064	-2.66921	-0.236787	-1.45105	-4.33224	0.00969254	0.813603	0.151808	5.50096e-05	2.01356	0.0895876	0.818706	4.25956	0.0201846	0.858478	0.229196
LIF	332	0.0570486	0.415979	0.473028	0.761071	0.120603	0.879397	0.517022	139.392	143.392	143.596	143.551	12.7535	4	62	1.23867e-07	4.64372	4.7961	6.46643	5.70274	4.86665	-0.841838	-0.644905	1.5137	0.526771	-0.553732	-0.222936	-0.0705496	1.59978	0.836091	-1.16711	-1.05012	3.03097	1.78521	-0.982886	-0.292426	5.03219	3.18607	0.329484	0.770937	4.43272e-06	0.00225882	0.482166	0.112981	5.35333	2.64612	0.444507	0.831403	1.6234e-05
EWSR1	333	0.0174179	0.0873306	0.104749	0.143733	0.166283	0.833717	0.468988	44.1125	48.1125	48.3159	48.2714	8.13986	4	62	2.4239e-05	9.2334	9.32071	8.60197	9.41067	9.2806	0.197398	0.466983	-1.75229	0.744772	0.34314	-0.0471999	0.0401079	-0.678626	0.130072	-1.03326	1.02819	-1.60061	1.09435	-0.453479	0.361494	-4.65031	1.07997	0.651787	0.718959	1.78502e-05	0.28434	0.185894	0.143296	4.74836	0.546163	0.749909	0.795643	5.83638e-05
PPP1R12B	334	0.0175287	0.177043	0.194572	0.254937	0.0900883	0.909912	0.380367	85.3233	89.3233	89.5267	89.4822	7.29852	4	62	6.97525e-05	5.56382	6.04187	5.50323	5.40879	6.08723	-0.492915	1.00633	-0.682926	-0.979101	1.14861	-0.523416	-0.0453665	-0.584002	-0.67844	-1.43735	-1.03195	-1.499	-1.60041	-3.54209	-0.289194	-2.82038	-3.9688	0.00076041	0.773398	0.00643387	0.000190245	3.11895	0.111597	2.19153	3.72069	0.00194523	0.833521	0.0138382
HLA-DPA1	335	0.143359	0.27022	0.413579	1.19057	0.346631	0.653369	0.806295	119.077	123.077	123.28	123.236	51.0242	4	62	6.05294e-19	9.47244	10.0005	7.9774	7.64648	10.0284	0.39403	0.859137	-0.922725	-1.21417	0.883733	-0.556007	-0.027926	-2.05105	-2.38196	-1.47019	-1.01955	-4.14407	-5.21244	-3.02725	-0.141988	-7.95835	-11.2034	0.00359222	0.88755	4.6736e-11	1.54117e-16	2.44464	0.0518071	10.3303	15.8122	0.00817741	0.914266	4.94663e-10
HLA-DMA	336	0.00907041	0.4894	0.49847	1.10409	0.0181965	0.981804	0.589744	145.222	149.222	149.426	149.381	21.5924	4	62	3.40613e-11	7.61747	8.17426	6.54825	6.12294	8.29102	0.274156	0.846542	-0.825028	-1.26225	0.966577	-0.67355	-0.116764	-1.74278	-2.16808	-1.59499	-1.0843	-3.34679	-4.49425	-2.75651	-0.45356	-5.09302	-7.67306	0.00766302	0.651729	3.53737e-06	1.46195e-10	2.1156	0.185933	5.45132	9.83507	0.0162214	0.749909	1.31425e-05
HIF1A	337	0.0226142	0.310405	0.333019	0.708465	0.0679067	0.932093	0.605646	119.261	123.261	123.464	123.42	21.6798	4	62	3.1714e-11	9.64852	8.95195	9.99447	10.3943	8.56024	0.184845	-0.744036	0.646166	1.1794	-1.26638	1.08828	0.391708	1.43423	1.83411	2.12621	1.31195	2.70238	3.56551	5.56899	1.89151	5.23861	8.11411	5.87516e-07	0.0632298	2.05373e-06	2.50903e-11	6.23098	1.19908	5.68746	10.6005	2.60742e-06	0.107358	8.12001e-06
KIT	338	0.122055	0.558813	0.680869	0.704149	0.179264	0.820736	0.308188	159.591	163.591	163.794	163.75	2.51912	4	62	0.0500709	5.20997	5.86489	5.94904	5.21862	5.45768	-0.941293	0.926402	1.16636	-0.916614	-0.234859	-0.247718	0.407208	0.491353	-0.239064	-1.18733	1.32612	1.40576	-1.18023	-0.940528	1.44966	1.33048	-0.784371	0.350597	0.152193	0.188233	0.435809	0.455192	0.817607	0.725303	0.360703	0.467463	0.229556	0.277662
NCR1	339	0.0743843	0.589403	0.663787	1.21235	0.11206	0.88794	0.569329	160.698	164.698	164.901	164.857	16.659	4	62	2.54589e-09	4.78861	4.99081	7.16682	6.31942	5.04576	-0.843651	-0.6484	1.45284	0.634554	-0.595342	-0.257145	-0.0549465	2.12106	1.27366	-1.19511	-1.03882	4.35015	2.41774	-0.952756	-0.191495	5.60738	4.07897	0.344414	0.848763	5.0726e-07	0.000131324	0.46292	0.0712133	6.29477	3.88165	0.461014	0.884667	2.29085e-06
CCND3	340	0.0123864	0.254504	0.26689	0.70843	0.0464102	0.95359	0.673292	106.03	110.03	110.233	110.189	30.1588	4	62	6.12337e-14	9.56534	8.73994	10.131	10.3152	8.49016	0.143738	-0.87014	0.838565	1.06479	-1.17696	1.07518	0.249779	1.64084	1.82501	2.10698	1.18903	3.11847	3.5431	6.08548	1.33692	6.63018	8.93122	7.9767e-08	0.186134	9.34887e-09	9.75175e-13	7.09818	0.730174	8.02924	12.0109	4.14742e-07	0.274829	5.86446e-08
TNFRSF17	341	0.00998184	0.178627	0.188609	0.202128	0.0529235	0.947076	0.199017	84.3683	88.3683	88.5717	88.5272	2.36583	4	62	0.0624545	4.63897	4.80505	4.95487	4.53691	4.96778	-0.743344	0.127597	0.913299	-1.27855	0.980997	-0.328812	-0.162734	-0.0129091	-0.43087	-1.25598	-1.11941	-1.00899	-1.34805	-2.22033	-1.03844	-0.0622283	-2.51555	0.0300603	0.3031	0.950581	0.0144899	1.52201	0.518415	0.0220108	1.83893	0.0559093	0.416204	0.962772
TNFRSF8	342	0.00103896	0.180895	0.181934	0.281046	0.00571061	0.994289	0.398398	82.8545	86.8545	87.0579	87.0134	10.0589	4	62	2.43813e-06	4.67014	4.78132	5.18192	5.61132	4.84782	-0.911017	-0.620276	0.427359	1.5503	-0.446366	-0.177676	-0.066501	0.3341	0.763497	-1.13106	-1.04717	1.26059	1.6976	-1.19786	-0.426438	1.60853	4.45164	0.235531	0.671266	0.1128	3.61995e-05	0.627952	0.173105	0.947691	4.4413	0.336774	0.76376	0.177619
C5	343	0	0.166988	0.166988	0.17157	0	1	0.085697	77.5757	79.5757	79.6424	79.6551	1.4528	4	62	0.227443	4.76711	4.78235	4.49324	4.5476	4.84869	0.505097	0.602157	-1.23905	-0.892841	1.02464	-0.0815797	-0.0663391	-0.355452	-0.301089	-1.05818	-1.04706	-1.27939	-1.23207	-0.572901	-0.443599	-1.78264	-1.8287	0.568784	0.658877	0.0795413	0.0722551	0.245053	0.181196	1.09941	1.14113	0.687002	0.754121	0.13115
CLEC7A	344	0.162975	0.416729	0.579704	0.819084	0.281135	0.718865	0.56302	144.259	148.259	148.462	148.418	12.0038	4	62	2.76294e-07	9.1601	8.38327	8.23108	9.48514	8.0144	0.796914	-0.428237	-0.66825	1.30955	-1.00998	1.1457	0.368864	0.21668	1.47074	2.21253	1.29134	1.16206	2.77164	5.02723	1.51329	0.677735	5.57555	4.51481e-06	0.135287	0.500461	5.72955e-07	5.34536	0.868743	0.30063	6.24188	1.6515e-05	0.207823	0.623552
RAPGEF2	345	0.00739203	0.0835063	0.0908983	0.108992	0.081322	0.918678	0.314161	38.3943	42.3943	42.5977	42.5532	4.88207	4	62	0.00173449	4.56923	4.81327	4.75896	4.42101	4.83882	-0.619279	0.741942	0.438976	-1.44607	0.884427	-0.269582	-0.0255445	-0.0798599	-0.417808	-1.20546	-1.01786	-1.05692	-1.3359	-2.65758	-0.237367	-0.561871	-3.56061	0.00999721	0.813155	0.57623	0.000717293	2.00012	0.0898267	0.239404	3.1443	0.0207769	0.858299	0.692758
CXCL13	346	0.00522842	0.0730075	0.078236	0.111046	0.0668289	0.933171	0.407967	29.4829	33.4829	33.6863	33.6417	8.72939	4	62	1.17737e-05	4.56804	4.79498	4.49245	4.28383	4.8438	-0.12476	0.865833	-0.454685	-1.36529	1.0789	-0.275761	-0.048814	-0.351347	-0.559968	-1.21063	-1.03441	-1.27575	-1.47424	-2.9099	-0.486118	-2.64636	-5.10848	0.00501502	0.628597	0.0102995	3.33973e-06	2.29973	0.201628	1.98719	5.47629	0.0111204	0.731977	0.0213762
CD274	347	0.332533	1.03638	1.36891	3.44512	0.242917	0.757083	0.740413	199.718	203.718	203.922	203.877	37.6714	4	62	5.82496e-16	10.4069	7.99561	9.9456	11.6458	7.471	0.527555	-0.86432	0.261259	1.24265	-1.16714	2.93595	0.524615	2.47461	4.17479	7.65258	1.43855	5.55816	18.0609	8.17414	1.36684	4.91195	10.0428	1.97452e-11	0.176611	6.90374e-06	1.26496e-14	10.7045	0.752983	5.16092	13.8979	2.2441e-10	0.262656	2.42457e-05
RAG1	348	0.0233787	0.510661	0.53404	0.622818	0.0437771	0.956223	0.253288	149.088	153.088	153.291	153.247	4.00443	4	62	0.00593334	4.79319	4.77204	6.01265	5.13272	4.8591	-0.613676	-0.654137	1.71945	0.0359273	-0.487562	-0.0659168	-0.0870651	1.15355	0.273615	-1.04675	-1.06221	2.22461	1.20883	-0.263441	-0.32915	3.29138	0.945506	0.793084	0.743152	0.00164811	0.348071	0.100681	0.128923	2.78301	0.458332	0.845517	0.813617	0.00397821
STAT1	349	0.0329041	0.556152	0.589056	1.52472	0.0558591	0.944141	0.669876	154.911	158.911	159.115	159.07	29.574	4	62	9.07344e-14	10.1989	8.6373	10.23	10.107	7.8034	0.721799	-0.680881	0.749717	0.63928	-1.42991	2.39549	0.833894	2.42657	2.30362	5.26156	1.78249	5.37615	4.93696	9.16535	3.01418	6.62761	7.62035	3.87266e-13	0.00372975	9.44448e-09	1.80497e-10	12.412	2.42832	8.02482	9.74353	7.21233e-12	0.00846451	5.9124e-08
LILRA5	350	0.161928	0.413489	0.575417	1.62981	0.281409	0.718591	0.782104	143.782	147.782	147.985	147.941	44.7633	4	62	1.25702e-17	8.31833	7.83375	9.91172	10.2694	7.24741	-0.302082	-0.670078	0.907953	1.17956	-1.11535	1.07092	0.586339	2.66431	3.02196	2.10077	1.50143	6.33923	8.12271	4.71747	2.41488	8.36601	11.5009	1.40149e-05	0.0187037	9.18939e-12	5.10279e-17	4.85341	1.72807	11.0367	16.2922	4.6365e-05	0.0364604	1.18921e-10
RRAD	351	0.0048657	0.0662218	0.0710875	0.102609	0.0684466	0.931553	0.41925	23.501	27.501	27.7044	27.6598	9.17213	4	62	6.91259e-06	4.57057	4.79311	4.61412	4.28233	4.84299	-0.225998	0.778855	-0.0293823	-1.52752	1.00405	-0.272413	-0.0498728	-0.22887	-0.560656	-1.20783	-1.03517	-1.17192	-1.47494	-3.01795	-0.52136	-1.80981	-5.36983	0.00368954	0.603973	0.0751725	1.25278e-06	2.43303	0.218982	1.12394	5.90213	0.00838037	0.712896	0.125017
IKBKE	352	0.0146738	0.225241	0.239915	0.628705	0.0611622	0.938838	0.676565	99.0969	103.097	103.3	103.256	29.2973	4	62	1.09478e-13	4.77548	5.36782	6.80116	6.16856	5.18482	-1.08528	-0.358141	1.40138	0.62482	-0.582782	-0.409342	0.182996	1.61633	0.983732	-1.32808	1.13524	3.06595	1.97757	-2.4601	1.03846	6.93404	5.1114	0.0166907	0.303091	2.79623e-09	3.30365e-06	1.77752	0.518427	8.55343	5.48101	0.0327854	0.416204	1.92671e-08
GPI	353	0.046961	0.0522356	0.0991965	0.106433	0.473413	0.526587	0.584697	20.3069	24.3069	24.5103	24.4658	4.37319	4	62	0.00352604	8.38388	8.49244	8.82192	8.53707	8.44034	-0.888403	-0.250768	1.68456	0.0113857	-0.556771	-0.0564592	0.0520958	0.381577	0.0967265	-1.03991	1.03677	1.30277	1.06934	-0.6984	0.600835	3.36268	1.03347	0.487539	0.55014	0.001327	0.305398	0.311991	0.259526	2.87713	0.515133	0.610911	0.670797	0.00326451
FCGR3	354	0.223272	0.423754	0.647026	0.737215	0.345074	0.654926	0.509368	146.933	150.933	151.136	151.092	6.58126	4	62	0.000176125	9.71211	8.93935	8.93933	9.51164	8.68022	1.27797	-0.499557	-0.499609	0.816826	-1.09563	1.0319	0.259137	0.259114	0.831419	2.04471	1.19676	1.19674	1.77943	4.48656	1.05219	0.80288	3.1228	3.19994e-05	0.296798	0.425111	0.00272189	4.49486	0.527539	0.371497	2.56513	0.000101606	0.409744	0.547978
NEFL	355	0.0197123	0.19839	0.218103	0.260635	0.0903809	0.909619	0.320908	92.3926	96.3926	96.596	96.5515	4.76099	4	62	0.00205148	4.56947	4.77928	5.46756	4.84847	4.86297	-1.0022	-0.376541	1.67592	-0.170208	-0.126969	-0.293502	-0.0836917	0.604583	-0.0144998	-1.22561	-1.05973	1.52054	-1.0101	-1.87628	-0.503964	2.75817	-0.0801275	0.0653258	0.616073	0.00762855	0.936394	1.18492	0.210368	2.11756	0.0285414	0.110305	0.721798	0.0161706
LTK	356	0	0.0806384	0.0806384	0.11288	0	1	0.328924	32.4431	34.4431	34.5097	34.5225	7.59725	4	62	4.77532e-05	4.66346	4.77965	4.49324	4.28342	4.84869	0.217801	0.726324	-0.527169	-1.44545	1.02849	-0.185234	-0.0690421	-0.355452	-0.565268	-1.137	-1.04902	-1.27939	-1.47966	-1.87193	-0.664364	-2.56528	-4.94053	0.0659351	0.508921	0.0127426	6.21587e-06	1.18088	0.29335	1.89474	5.2065	0.111094	0.631029	0.0256853
IL10RB	357	0.135395	0.278207	0.413602	0.857417	0.327356	0.672644	0.722612	120.398	124.398	124.601	124.557	31.0742	4	62	3.34124e-14	9.77444	8.92879	10.2814	10.67	8.64336	0.132892	-0.84562	0.719518	1.16911	-1.1759	1.13109	0.285436	1.63807	2.02661	2.19024	1.21878	3.11248	4.07447	6.07065	1.43107	6.26579	9.39653	8.4523e-08	0.157433	3.93674e-08	1.5622e-13	7.07303	0.802905	7.40486	12.8063	4.36797e-07	0.23688	2.18231e-07
TGFBR2	358	0.0195234	0.269075	0.288599	0.426468	0.0676488	0.932351	0.432048	110.391	114.391	114.595	114.55	9.88136	4	62	2.9961e-06	9.69861	9.23135	9.05177	10.1183	8.99626	0.583795	-0.392675	-0.767941	1.46078	-0.883957	0.702352	0.23509	0.0555162	1.12201	1.62716	1.17698	1.03923	2.1765	3.86033	1.21934	0.217798	5.33148	0.000272662	0.227335	0.828302	1.4481e-06	3.56438	0.643333	0.0818113	5.8392	0.000752507	0.32643	0.869519
LILRA6	359	0.0686479	0.626211	0.694858	1.13805	0.0987941	0.901206	0.510512	163.973	167.973	168.177	168.132	12.9787	4	62	9.77039e-08	4.68081	4.78545	6.82848	6.02434	4.87335	-0.799193	-0.688817	1.46616	0.617955	-0.596101	-0.192543	-0.0879002	1.95513	1.15099	-1.14278	-1.06282	3.87751	2.22066	-0.692522	-0.297629	5.01801	3.57846	0.491195	0.766981	4.67135e-06	0.00067793	0.308746	0.115215	5.33056	3.16882	0.613994	0.828878	1.70269e-05
JAK3	360	0	0.341457	0.341457	1.12743	0	1	0.715492	121.924	123.924	123.991	124.004	38.9799	4	62	2.76735e-16	4.91954	5.12548	7.40324	6.8619	5.09736	-0.828795	-0.651368	1.31107	0.844678	-0.67559	-0.177821	0.0281145	2.30588	1.76454	-1.13117	1.01968	4.94468	3.39766	-0.873284	0.13147	8.0871	7.4947	0.385878	0.895829	2.79468e-11	2.98296e-10	0.41355	0.0477748	10.5537	9.52535	0.505102	0.921561	3.04156e-10
HMGB2	361	0.0116065	0.114069	0.125676	0.143979	0.092353	0.907647	0.293667	58.1544	62.1544	62.3578	62.3133	4.21129	4	62	0.00442839	8.15159	8.3983	8.37291	8.67124	8.3645	-1.29777	0.035619	-0.101608	1.51082	-0.147055	-0.212911	0.0337992	0.00840886	0.306747	-1.15902	1.0237	1.00585	1.23692	-1.79481	0.268347	0.0505857	2.23527	0.0775594	0.789323	0.959818	0.0290111	1.11037	0.102745	0.017811	1.53744	0.128304	0.842967	0.967673
TGFBR1	362	0.0209022	0.294547	0.31545	0.631444	0.0662618	0.933738	0.579846	115.942	119.942	120.145	120.101	18.5178	4	62	4.67324e-10	8.67668	9.6199	7.9509	8.10693	9.14836	-0.0340944	1.31313	-1.07075	-0.847891	0.639614	-0.471674	0.471537	-1.19746	-1.04143	-1.38672	1.38659	-2.29335	-2.05826	-2.47805	2.33807	-4.49052	-4.73022	0.0159474	0.0226246	3.15544e-05	1.33842e-05	1.79731	1.64542	4.50094	4.87341	0.0314657	0.0433358	0.000100401
IL18R1	363	0.0758019	1.03448	1.11028	2.65153	0.0682726	0.931727	0.648898	193.91	197.91	198.113	198.069	26.3001	4	62	9.02877e-13	6.84823	5.8144	8.44209	9.08048	5.56688	-0.193284	-0.854536	0.826175	1.2345	-1.01285	1.28135	0.247516	2.87521	3.5136	2.43066	1.18716	7.33711	11.4208	3.59166	0.654678	5.75254	8.51453	0.000650166	0.515097	2.90406e-07	5.08861e-12	3.18698	0.288111	6.53699	11.2934	0.00167996	0.637916	1.38674e-06
LTF	364	1.20978	1.11652	2.32631	3.31809	0.520044	0.479956	0.715916	211.324	215.324	215.528	215.483	22.9788	4	62	1.1187e-11	7.37566	6.1324	8.0647	9.5165	5.91414	-0.0169306	-0.85817	0.449303	1.43166	-1.00586	1.46152	0.218263	2.15056	3.60236	2.75398	1.16333	4.43999	12.1456	3.90926	0.544086	4.09763	8.3223	0.00023194	0.588334	0.000123276	1.09371e-11	3.63462	0.230376	3.90912	10.9611	0.000650616	0.702624	0.000357859
IL2	365	0.0128323	0.326627	0.339459	0.394282	0.0378022	0.962198	0.243007	121.107	125.107	125.31	125.266	3.92892	4	62	0.00660445	5.01609	4.7969	5.4174	5.53976	4.83053	-0.305621	-0.949427	0.87314	1.23256	-0.850651	0.185556	-0.0336284	0.586868	0.709232	1.13726	-1.02358	1.50198	1.63493	0.927734	-0.159156	2.09491	3.06612	0.357143	0.874063	0.0402712	0.00321086	0.447158	0.0584571	1.39501	2.49338	0.474138	0.904001	0.0722817
ALOX15	366	0.712516	0.519071	1.23159	1.53559	0.578535	0.421465	0.715334	165.339	169.339	169.542	169.498	10.616	4	62	1.28753e-06	7.45531	7.2109	5.61236	6.27113	7.16468	0.918764	0.603574	-1.45793	-0.608369	0.543962	0.290631	0.046225	-1.55232	-0.893546	1.22318	1.03256	-2.93288	-1.85774	1.13977	0.168868	-4.33611	-3.02648	0.258767	0.86645	5.42723e-05	0.00360022	0.587092	0.0622563	4.26542	2.44367	0.365262	0.898239	0.000165668
CCL19	367	0	0.44247	0.44247	1.40244	0	1	0.703621	137.992	139.992	140.058	140.071	36.7979	4	62	9.67049e-16	5.3921	4.77965	7.25223	7.22967	4.84869	-0.407839	-0.899181	1.08445	1.06636	-0.843792	0.543411	-0.0690421	2.40354	2.38098	1.45741	-1.04902	5.29099	5.2089	2.34437	-0.283619	7.40515	8.88391	0.0222776	0.777647	4.26694e-10	1.17577e-12	1.65213	0.109217	9.36988	11.9297	0.0427946	0.836005	3.57125e-09
CARD9	368	0.0472185	0.17074	0.217958	0.416705	0.21664	0.78336	0.6451	87.1764	91.1764	91.3798	91.3353	20.1321	4	62	1.15006e-10	7.17169	6.80264	7.73575	7.80962	6.5252	-0.0661205	-0.720488	0.934017	1.065	-1.2124	0.646483	0.277431	1.21054	1.28441	1.56535	1.21203	2.31425	2.43583	4.43672	1.78303	5.92373	7.61658	3.81535e-05	0.0794763	1.49746e-07	1.83237e-10	4.41847	1.09976	6.82464	9.73699	0.000119181	0.131112	7.33256e-07
S100A8	369	0.301035	1.60887	1.90991	6.26227	0.157617	0.842383	0.775047	224.483	228.483	228.686	228.642	48.1585	4	62	2.33914e-18	14.6945	12.7339	17.0193	17.643	11.5297	-0.0112078	-0.752826	0.868238	1.10415	-1.20836	3.16473	1.20422	5.48958	6.11324	8.96762	2.30413	44.9292	69.2258	7.08571	2.53026	8.76691	11.8288	1.5279e-09	0.0139515	1.86849e-12	1.52846e-17	8.81591	1.85538	11.7285	16.8157	1.11515e-08	0.0279211	2.75356e-11
DEFB103A	370	0.0102873	0.173414	0.183701	0.187317	0.0560001	0.944	0.162179	82.6649	86.6649	86.8683	86.8238	1.5234	4	62	0.206378	4.63977	4.78995	5.09969	4.77041	4.84409	-1.11831	-0.229763	1.60285	-0.345364	0.0905866	-0.204324	-0.0541448	0.255598	-0.0736833	-1.15215	-1.03824	1.19383	-1.0524	-1.39999	-0.350476	1.25018	-0.436498	0.166501	0.727169	0.215933	0.663992	0.778583	0.138364	0.665682	0.177837	0.249549	0.801604	0.312241
TPSAB1	371	0.0242918	0.190978	0.215269	0.296771	0.112844	0.887156	0.430068	90.8545	94.8545	95.0579	95.0133	8.54616	4	62	1.47124e-05	4.56656	4.78161	5.59338	5.24149	4.86424	-1.08707	-0.559242	1.43322	0.56952	-0.356429	-0.297681	-0.082631	0.729146	0.377253	-1.22917	-1.05895	1.65766	1.29887	-1.93756	-0.505872	3.38625	2.12241	0.0572347	0.61474	0.00123452	0.0378048	1.24234	0.211308	2.9085	1.42245	0.098427	0.721295	0.00304919
CD81	372	0.0579747	0.138298	0.196272	0.687541	0.295379	0.704621	0.827502	76.243	80.243	80.4464	80.4019	63.2708	4	62	3.35932e-21	9.19559	8.81935	10.3243	10.6745	8.70658	-0.387515	-0.8059	0.867665	1.25705	-0.931304	0.489002	0.112769	1.61772	1.96788	1.40347	1.0813	3.0689	3.91193	3.72393	0.802696	8.78118	12.9471	0.000425608	0.425217	1.76578e-12	2.76898e-19	3.37099	0.371389	11.7531	18.5577	0.00114287	0.547978	2.61472e-11
KIR3DS1	373	0.121441	0.96925	1.09069	2.18061	0.111343	0.888657	0.606165	191.512	195.512	195.715	195.671	19.8358	4	62	1.48074e-10	4.95742	4.89132	8.08197	6.89531	4.91305	-0.674653	-0.719679	1.45378	0.645433	-0.704878	0.0443704	-0.0217277	3.16892	1.98226	1.03123	-1.01517	8.99373	3.95113	0.128203	-0.0590545	6.53313	4.95064	0.898403	0.953099	1.37268e-08	5.989e-06	0.0465287	0.0208621	7.86243	5.22265	0.923277	0.963421	8.32257e-08
IL5	374	0	0.118768	0.118768	0.117363	0	1	0.0493562	56.4495	58.4495	58.5162	58.5289	0.80474	4	62	0.526842	4.65941	4.77965	4.63964	4.75177	4.84869	-0.882338	0.505923	-1.11068	0.183999	1.3031	-0.189277	-0.0690421	-0.209054	-0.0969234	-1.14019	-1.04902	-1.15593	-1.06949	-1.57611	-0.547427	-1.24317	-0.698021	0.120089	0.58605	0.218484	0.487774	0.920498	0.232065	0.66058	0.311782	0.187563	0.700985	0.315338
PTGER2	375	0.0127069	0.475324	0.488031	1.82177	0.026037	0.973963	0.759827	143.806	147.806	148.01	147.965	47.2741	4	62	3.59345e-18	5.25063	4.7831	7.82425	7.50498	4.85277	-0.530054	-0.842744	1.19124	0.977706	-0.796152	0.397861	-0.0696627	2.97148	2.65221	1.31755	-1.04947	7.84341	6.28629	1.65079	-0.27403	8.80347	9.51596	0.103838	0.784972	1.61659e-12	9.78985e-14	0.983643	0.105146	11.7914	13.0092	0.165027	0.840944	2.42882e-11
CD48	376	0.0360862	0.148834	0.184921	0.23876	0.195144	0.804856	0.45816	78.0408	82.0408	82.2442	82.1997	8.29717	4	62	1.99614e-05	11.8774	11.672	11.8034	12.4008	11.5633	0.0433889	-0.591005	-0.185339	1.6599	-0.926942	0.314148	0.108761	0.240096	0.837497	1.24328	1.0783	1.18107	1.78695	2.31025	0.749535	1.25913	5.3221	0.0242161	0.456369	0.212702	1.50022e-06	1.6159	0.340684	0.672229	5.82384	0.0460689	0.580266	0.308583
MEF2D	377	0	0.182171	0.182171	0.194218	0	1	0.118874	82.9712	84.9712	85.0379	85.0506	2.09112	4	62	0.0926621	5.77888	5.98695	5.81274	6.19649	5.81518	-0.792592	0.392431	-0.599772	1.58582	-0.585882	-0.0362953	0.171777	-0.002439	0.381318	-1.02548	1.12645	-1.00169	1.30253	-0.244034	1.09974	-0.0117111	2.21737	0.80801	0.275698	0.990694	0.0302726	0.0925832	0.559567	0.00406059	1.51895	0.855213	0.384404	0.992119
TNFSF14	378	0.0594116	0.433857	0.493269	0.827297	0.120445	0.879555	0.536564	141.996	145.996	146.199	146.155	14.6193	4	62	1.82596e-08	5.78133	5.75825	7.14553	6.91525	5.29812	-0.495317	-0.524016	1.20089	0.914568	-1.09613	0.483209	0.460127	1.84741	1.61713	1.39785	1.37566	3.59853	3.06764	2.08604	1.86754	5.69017	6.03409	0.0410955	0.0665553	3.69215e-07	9.74787e-08	1.38621	1.17682	6.43272	7.01109	0.0735042	0.112078	1.72562e-06
CD58	379	0	0.0851057	0.0851057	0.0946215	0	1	0.155079	35.786	37.786	37.8526	37.8654	2.8449	4	62	0.0312816	9.17471	9.3682	9.24418	9.43676	9.11588	-0.700145	0.752837	-0.17849	1.26774	-1.14194	0.0588311	0.252317	0.128297	0.320883	1.04162	1.19112	1.093	1.24909	0.578719	2.36336	0.901284	2.72997	0.564876	0.0212595	0.370925	0.00823449	0.248047	1.67245	0.430714	2.08436	0.683085	0.0409501	0.489481
C1S	380	0.015045	0.128631	0.143676	0.14487	0.104715	0.895285	0.211656	66.0602	70.0602	70.2636	70.219	1.5504	4	62	0.198813	4.56886	4.79087	4.63651	4.77295	4.84296	-1.33754	0.596089	-0.748338	0.440007	1.04978	-0.274105	-0.0520918	-0.206455	-0.0700126	-1.20924	-1.03677	-1.15385	-1.04973	-2.17467	-0.388916	-1.16877	-0.48013	0.033479	0.698671	0.246972	0.632825	1.47523	0.155728	0.607353	0.198717	0.0614513	0.783366	0.35135
CD247	381	0.0907928	0.162125	0.252918	0.667634	0.358981	0.641019	0.792962	87.7116	91.7116	91.915	91.8705	46.7079	4	62	4.74522e-18	7.17807	7.71585	6.08621	6.23116	8.01242	0.154337	0.776838	-1.10954	-0.941763	1.12013	-0.834344	-0.296569	-1.9262	-1.78126	-1.78305	-1.22822	-3.80054	-3.43726	-5.86394	-1.94609	-9.64737	-10.8146	1.88819e-07	0.05618	5.86226e-14	6.6354e-16	6.72395	1.25042	13.2319	15.1781	9.14405e-07	0.096938	1.45611e-12
LILRB2	382	0.0848493	0.19988	0.284729	0.868599	0.298	0.702	0.802712	99.1461	103.146	103.349	103.305	47.2763	4	62	3.58954e-18	8.02098	7.4627	9.26631	9.22692	7.23983	-0.231844	-0.813906	1.06655	1.02548	-1.04627	0.781145	0.22287	2.02647	1.98708	1.71849	1.16705	4.07408	3.96434	4.94801	1.31946	9.14941	10.8741	6.04731e-06	0.191867	4.12357e-13	5.30074e-16	5.21844	0.716999	12.3847	15.2757	2.15575e-05	0.281943	7.55988e-12
NFIL3	383	0.0899365	0.779592	0.869528	1.90073	0.103431	0.896569	0.63569	177.726	181.726	181.93	181.885	24.1086	4	62	4.64492e-12	9.53103	7.99941	9.1069	10.8242	7.85824	0.384394	-0.876125	0.0353406	1.4487	-0.992307	1.67279	0.14117	1.24866	2.96599	3.1883	1.1028	2.37621	7.81362	5.39115	0.428182	2.87156	8.26264	1.1557e-06	0.670002	0.00558291	1.3873e-11	5.93716	0.173924	2.25314	10.8578	4.86276e-06	0.763245	0.0122434
ABCB1	384	0.0338353	0.332445	0.36628	0.376191	0.0923756	0.907624	0.212146	124.475	128.475	128.678	128.634	1.80005	4	62	0.140183	5.38762	5.15541	5.72262	5.37543	5.05666	0.187016	-0.716365	1.49034	0.139584	-1.10057	0.330961	0.0987564	0.665966	0.318769	1.25785	1.07085	1.58663	1.24727	1.63426	0.459281	2.34675	1.36066	0.107273	0.647639	0.0221477	0.178547	0.969509	0.188667	1.65467	0.748246	0.169785	0.747863	0.0425811
IL11RA	385	0.161173	0.420871	0.582044	1.05366	0.276909	0.723091	0.656766	144.761	148.761	148.964	148.919	20.2529	4	62	1.03804e-10	5.49341	5.60613	7.62684	6.93834	5.65902	-0.80149	-0.68437	1.41534	0.699928	-0.62941	-0.165606	-0.0528925	1.96782	1.27932	-1.12164	-1.03734	3.91177	2.42725	-0.723126	-0.215958	6.12512	4.82631	0.472322	0.82973	6.83219e-08	9.44275e-06	0.325762	0.0810633	7.16544	5.0249	0.597189	0.870129	3.61566e-07
TNFSF10	386	0.0907952	0.843376	0.934171	2.53468	0.0971933	0.902807	0.703848	182.373	186.373	186.576	186.532	33.0033	4	62	9.67454e-15	8.92574	6.8739	9.18092	9.94084	6.58893	0.419969	-0.961701	0.591807	1.10352	-1.15359	2.3368	0.284964	2.59199	3.3519	5.05182	1.21838	6.0293	10.2099	7.24289	0.831582	5.73294	8.98052	8.15933e-10	0.408836	3.13187e-07	8.02593e-13	9.08835	0.38845	6.5042	12.0955	6.37836e-09	0.529305	1.48661e-06
CCL24	387	0	0.209764	0.209764	0.224456	0	1	0.122097	91.7154	93.7154	93.7821	93.7949	2.15571	4	62	0.0844739	5.23011	5.11019	4.84924	5.44726	5.04507	0.42248	-0.117993	-1.29417	1.4012	-0.411526	0.185039	0.0651256	-0.19583	0.402187	1.13685	1.04618	-1.14538	1.32151	1.15941	0.388553	-0.87627	2.17948	0.250733	0.698938	0.384266	0.0331033	0.600788	0.155561	0.415368	1.48013	0.355879	0.78338	0.504062
IL1RAP	388	0.178914	0.807272	0.986186	1.90367	0.18142	0.81858	0.630483	182.462	186.462	186.666	186.621	21.5636	4	62	3.48723e-11	11.0385	9.65702	11.197	12.1163	9.22718	0.330376	-0.836057	0.464225	1.24046	-1.19901	1.81127	0.429846	1.96979	2.8891	3.50952	1.34709	3.91712	7.4081	5.72133	1.273	4.4374	7.88618	3.27506e-07	0.20777	3.80619e-05	6.23604e-11	6.48478	0.682417	4.41951	10.2051	1.54712e-06	0.301855	0.000119016
CD99	389	0.179064	0.0863984	0.265462	0.303522	0.674536	0.325464	0.76108	56.8533	60.8533	61.0567	61.0121	14.0172	4	62	3.34537e-08	9.27266	9.37273	8.68479	8.73366	9.37768	0.528248	0.814947	-1.15618	-1.01616	0.829145	-0.105015	-0.00495527	-0.692891	-0.644024	-1.07551	-1.00344	-1.61652	-1.56268	-1.00904	-0.0443252	-4.74135	-5.34412	0.31688	0.964788	1.28557e-05	1.3806e-06	0.499106	0.0155683	4.8909	5.85993	0.431472	0.972046	4.29919e-05
TLR5	390	0.0979199	0.64937	0.74729	1.45072	0.131033	0.868967	0.605574	167.362	171.362	171.565	171.521	20.0458	4	62	1.23768e-10	8.19102	6.73336	8.01397	8.36931	6.1646	0.70833	-0.773948	0.52829	0.889634	-1.35231	2.02642	0.568754	1.84937	2.20471	4.07392	1.48324	3.60342	4.60981	7.14777	1.88504	4.65377	6.72132	1.1928e-09	0.0641125	1.76299e-05	6.51356e-09	8.92343	1.19306	4.75375	8.18618	8.98245e-09	0.108617	5.77047e-05
SOCS3	391	0.152612	1.32319	1.4758	3.41439	0.10341	0.89659	0.655779	210.525	214.525	214.729	214.684	26.5916	4	62	7.30746e-13	8.60181	6.3395	8.97495	9.41371	5.6894	0.476537	-0.874542	0.699381	0.961414	-1.26279	2.9124	0.650099	3.28554	3.7243	7.52871	1.56928	9.75096	13.2168	7.2047	1.51353	5.79967	7.96375	9.50362e-10	0.135227	2.42109e-07	4.57382e-11	9.02211	0.868937	6.61599	10.3397	7.29954e-09	0.207823	1.16152e-06
CLEC6A	392	0.108746	0.206766	0.315512	0.530215	0.344667	0.655333	0.66713	102.433	106.433	106.637	106.592	21.7385	4	62	3.02339e-11	5.69271	5.32857	6.30429	6.73839	5.29586	-0.283694	-0.860015	0.684225	1.37127	-0.911785	0.396855	0.0327103	1.00843	1.44253	1.31663	1.02293	2.01172	2.71797	2.47018	0.190139	4.47326	7.75658	0.0162694	0.849822	3.3541e-05	1.0469e-10	1.78863	0.0706722	4.47442	9.98009	0.0320395	0.885471	0.000106064
HMGN1	393	0.034525	0.131368	0.165893	0.183003	0.208116	0.791884	0.377382	70.6797	74.6797	74.8831	74.8386	3.99838	4	62	0.00598445	9.31396	9.51875	9.92447	9.65244	9.40066	-1.03691	-0.180997	1.51471	0.377753	-0.674548	-0.086701	0.118089	0.523811	0.251778	-1.06194	1.0853	1.43775	1.19067	-0.678468	0.865618	2.92287	1.70248	0.5	0.390037	0.00483536	0.0936743	0.30103	0.408894	2.31557	1.02838	0.623387	0.509679	0.010792
CD79B	394	0.00204539	0.12583	0.127875	0.19761	0.0159952	0.984005	0.409698	60.8974	64.8974	65.1008	65.0563	10.1585	4	62	2.17317e-06	6.37146	6.63959	7.18686	7.05511	6.78668	-1.34066	-0.51709	1.16387	0.759198	-0.0653113	-0.415217	-0.147086	0.400184	0.268436	-1.3335	-1.10733	1.31968	1.2045	-3.35208	-1.12745	2.30701	1.87409	0.00137066	0.263896	0.0244078	0.0656323	2.86307	0.578567	1.61247	1.18288	0.00336384	0.370633	0.0463763
FCGR1A	395	0.41843	1.36997	1.7884	4.81244	0.233969	0.766031	0.754051	216.773	220.773	220.976	220.932	40.5933	4	62	1.13208e-16	7.57536	5.46169	8.41076	10.2496	5.00592	0.108709	-0.870335	0.495661	1.34741	-1.08144	2.56944	0.455763	3.40484	5.24369	5.93579	1.37151	10.5915	37.8884	6.22311	1.03322	5.87947	10.9733	4.65475e-08	0.305513	1.77799e-07	3.64823e-16	7.3321	0.51497	6.75007	15.4379	2.52406e-07	0.418355	8.63754e-07
GRB2	396	0.0038875	0.15268	0.156567	0.306887	0.0248295	0.97517	0.541667	73.3361	77.3361	77.5395	77.495	17.5209	4	62	1.14709e-09	9.17381	8.78661	9.42165	9.64712	8.47562	0.153897	-0.66408	0.677456	1.15378	-1.32105	0.698193	0.310988	0.94603	1.1715	1.62247	1.24056	1.92656	2.25247	5.11205	2.15911	4.94592	7.41737	3.29568e-06	0.0347195	6.09385e-06	4.06353e-10	5.48205	1.45943	5.21511	9.3911	1.23488e-05	0.0633884	2.16983e-05
CCR4	397	0.125677	0.172482	0.298159	0.514506	0.42151	0.57849	0.715455	93.0928	97.0928	97.2962	97.2516	23.8874	4	62	5.50665e-12	7.1557	7.26457	5.92396	6.21146	7.34339	0.568381	0.733005	-1.29415	-0.859424	0.852185	-0.187687	-0.0788167	-1.41943	-1.13193	-1.13894	-1.05615	-2.67479	-2.19152	-1.27816	-0.500721	-6.88729	-6.65849	0.205959	0.618341	3.36812e-09	8.35671e-09	0.68622	0.208772	8.47261	8.07796	0.299647	0.723315	2.29509e-08
NOD2	398	0.0220773	0.222698	0.244775	0.55268	0.0901944	0.909806	0.640491	99.5513	103.551	103.755	103.71	24.9062	4	62	2.53385e-12	7.98057	7.45265	8.44059	8.49215	6.85542	0.196463	-0.564517	0.859557	0.933888	-1.42539	1.12515	0.597224	1.58516	1.63673	2.18124	1.5128	3.00042	3.1096	6.78894	3.39444	6.82568	8.53697	4.97968e-09	0.00120386	4.30315e-09	4.6542e-12	8.3028	2.91942	8.36621	11.3322	3.29129e-08	0.00297584	2.88124e-08
IL6ST	399	0.0873262	0.144494	0.23182	0.324724	0.376698	0.623302	0.621141	81.0131	85.0131	85.2165	85.172	14.0541	4	62	3.2225e-08	8.36193	8.11132	8.75454	9.07313	8.10655	-0.282501	-0.874638	0.645149	1.3979	-0.885915	0.255384	0.00477281	0.647993	0.966583	1.19365	1.00331	1.56699	1.95421	1.90091	0.0331605	3.43698	6.21492	0.061965	0.973653	0.00105577	4.80662e-08	1.20785	0.0115958	2.97643	7.31816	0.105639	0.979291	0.002633
BAX	400	0.00742011	0.0896295	0.0970496	0.301729	0.076457	0.923543	0.733584	42.5898	46.5898	46.7932	46.7487	37.3732	4	62	6.91911e-16	7.98747	8.03092	9.23413	8.88402	7.96023	-0.722838	-0.650105	1.36367	0.77769	-0.768418	0.0272337	0.0706909	1.2739	0.923783	1.01906	1.05022	2.41815	1.89708	0.259212	0.634465	8.65398	7.6012	0.79633	0.528112	2.92416e-12	1.94861e-10	0.0989069	0.277274	11.534	9.71028	0.847804	0.650807	4.15041e-11
ROCK2	401	0.0247542	0.329983	0.354737	0.660497	0.0697819	0.930218	0.550689	123.129	127.129	127.333	127.288	17.1422	4	62	1.62428e-09	8.05787	6.96024	7.91743	8.2568	6.88871	0.68648	-1.01958	0.468186	0.995678	-1.13076	1.16916	0.0715328	1.02872	1.36809	2.24881	1.05083	2.04021	2.58129	5.80201	0.334925	3.64381	5.86943	2.39933e-07	0.738812	0.000550673	1.8485e-07	6.61991	0.131466	3.25911	6.73318	1.15287e-06	0.810667	0.00143931
ISG20	402	0.0246753	0.678874	0.703549	2.65209	0.0350725	0.964927	0.765711	166.34	170.34	170.543	170.499	48.674	4	62	1.82613e-18	10.0265	7.61097	10.1339	10.8199	7.35762	0.526621	-0.993658	0.594214	1.02594	-1.15311	2.66891	0.253358	2.77631	3.46227	6.35949	1.19198	6.85096	11.0216	9.25803	0.832215	6.87606	10.385	2.68986e-13	0.408482	3.52197e-09	3.39703e-15	12.5703	0.388827	8.45321	14.4689	5.32553e-12	0.529068	2.38935e-08
CCL7	403	0.0412961	0.600032	0.641328	1.93705	0.0643915	0.935609	0.720757	159.98	163.98	164.184	164.139	36.9741	4	62	8.7245e-16	5.82813	5.04583	6.928	8.23954	4.99374	-0.274627	-0.841609	0.522523	1.47308	-0.879365	0.834392	0.0520943	1.93426	3.2458	1.78311	1.03677	3.82183	9.486	3.07171	0.181029	5.08279	10.3305	0.00315919	0.856935	3.67436e-06	4.18452e-15	2.50042	0.0670521	5.43482	14.3784	0.00729408	0.890472	1.36186e-05
MIF	404	0.0211808	0.235693	0.256874	0.464055	0.0824558	0.917544	0.545549	102.77	106.77	106.974	106.929	15.6393	4	62	6.71457e-09	6.8705	6.81249	8.22505	7.73149	6.8945	-0.683859	-0.774774	1.43923	0.665639	-0.646232	-0.0240068	-0.0820112	1.33055	0.836991	-1.01678	-1.05849	2.51498	1.78632	-0.14086	-0.45354	5.57177	4.24546	0.888437	0.651743	5.81309e-07	7.43226e-05	0.0513733	0.185923	6.23559	4.12888	0.914873	0.749909	2.5836e-06
JAK1	405	0	0.100598	0.100598	0.139963	0	1	0.32481	46.155	48.155	48.2217	48.2345	7.45651	4	62	5.70574e-05	9.97254	9.95546	9.21675	9.74588	9.86353	0.710943	0.656187	-1.71264	-0.0158887	0.361394	0.109007	0.0919311	-0.646783	-0.117655	1.07849	1.0658	-1.56567	-1.08497	0.986273	0.792009	-4.17915	-0.920673	0.327833	0.431375	9.33571e-05	0.36079	0.484348	0.365145	4.02985	0.442746	0.442862	0.553829	0.000275158
IL29	406	0.10256	0.229791	0.332351	0.517372	0.308589	0.691411	0.619621	108.065	112.065	112.269	112.224	16.9194	4	62	1.99675e-09	6.16868	5.74952	7.05013	6.72617	5.54852	-0.125739	-0.785178	1.261	0.751321	-1.1014	0.62016	0.201001	1.50161	1.17765	1.53705	1.1495	2.83159	2.26207	3.66319	1.10946	6.32193	6.00955	0.000517546	0.271516	3.15736e-08	1.07257e-07	3.28605	0.566205	7.50068	6.96957	0.00136359	0.379605	1.77134e-07
IL33	407	0	0.212263	0.212263	0.202343	0	1	0.0145505	92.4499	94.4499	94.5165	94.5293	0.228864	4	62	0.921197	4.88121	4.77965	4.76082	4.91702	4.84869	0.65952	-0.872132	-1.15615	1.19964	0.169121	0.0325168	-0.0690421	-0.0878743	0.0683303	1.02279	-1.04902	-1.0628	1.0485	0.20254	-0.409487	-0.390885	0.368101	0.840158	0.683594	0.697222	0.714052	0.075639	0.165202	0.156629	0.14627	0.877777	0.771422	0.783366
LILRA2	408	0.135719	0.279325	0.415043	1.23157	0.326999	0.673001	0.806101	120.637	124.637	124.841	124.796	50.1161	4	62	9.23129e-19	9.68511	8.95713	10.9179	11.1133	8.55648	-0.140625	-0.777049	0.937082	1.10791	-1.12731	1.12864	0.400656	2.36139	2.55679	2.18652	1.32011	5.13864	5.88396	6.04538	2.00473	9.01454	11.831	9.32789e-08	0.0493635	7.01711e-13	1.51596e-17	7.03022	1.30659	12.1538	16.8193	4.7331e-07	0.0865336	1.2142e-11
CD27	409	0.0231728	0.144713	0.167885	0.678156	0.138027	0.861973	0.812302	74.5181	78.5181	78.7215	78.677	60.2103	4	62	1.13664e-20	7.04253	7.62045	5.73965	6.02972	7.83522	0.201868	0.819067	-1.18958	-0.879796	1.04844	-0.792688	-0.214775	-2.09557	-1.8055	-1.7323	-1.16052	-4.27394	-3.4955	-5.92147	-1.507	-11.1673	-11.6567	1.51067e-07	0.13689	1.76363e-16	2.87323e-17	6.82083	0.863629	15.7536	16.5416	7.3738e-07	0.209761	1.06509e-14
ICAM2	410	0.0131461	0.150907	0.164054	0.163191	0.0801332	0.919867	0.171845	75.0359	79.0359	79.2393	79.1948	0.969211	4	62	0.430868	8.62922	8.58404	8.41187	8.37646	8.51491	1.16218	0.7452	-0.843857	-1.17066	0.107135	0.114311	0.0691321	-0.103037	-0.138445	1.08246	1.04909	-1.07403	-1.10072	0.83833	0.477942	-0.539309	-0.877727	0.405066	0.634372	0.591605	0.383481	0.392475	0.197656	0.227968	0.416256	0.525306	0.737119	0.70571
IRAK2	411	0.0863099	0.302084	0.388394	0.897192	0.222223	0.777777	0.708607	122.71	126.71	126.913	126.869	31.0166	4	62	3.46985e-14	6.68216	5.77043	7.37134	7.80494	5.84139	-0.0131434	-1.02105	0.748735	1.22807	-0.942614	0.840777	-0.0709513	1.52995	1.96355	1.79101	-1.05041	2.88777	3.90021	4.33751	-0.342726	5.62776	8.75279	5.40096e-05	0.732964	4.6916e-07	1.97607e-12	4.26753	0.134918	6.32868	11.7042	0.000165193	0.805684	2.14076e-06
IFNAR1	412	0.0593308	0.247827	0.307158	0.375597	0.193161	0.806839	0.426271	109.596	113.596	113.799	113.755	6.52181	4	62	0.000190378	8.01128	7.5541	7.3517	7.91183	7.22082	1.16656	-0.162314	-0.750644	0.877478	-1.13108	0.790466	0.333288	0.130883	0.691011	1.72963	1.25988	1.09496	1.61441	4.50512	1.78019	0.531954	3.40318	2.99643e-05	0.0799448	0.596659	0.00117191	4.5234	1.09721	0.224274	2.93111	9.56372e-05	0.131603	0.710089
TNFRSF13C	413	0.0601881	0.354793	0.414981	0.752395	0.145038	0.854962	0.58593	130.349	134.349	134.553	134.508	17.4582	4	62	1.2148e-09	5.25199	5.35712	7.24008	6.36623	5.60959	-0.853579	-0.727721	1.52646	0.480326	-0.425484	-0.357596	-0.252465	1.63049	0.756638	-1.28129	-1.19124	3.09618	1.68955	-1.70562	-1.1307	5.54762	3.11903	0.0930836	0.262536	6.37488e-07	0.00275217	1.03113	0.580811	6.19553	2.56032	0.150103	0.369566	2.80495e-06
TGFB2	414	0.00608297	0.259553	0.265636	0.282722	0.0228997	0.9771	0.153132	106.138	110.138	110.342	110.297	2.14897	4	62	0.0852939	5.24605	5.32727	5.50653	5.63737	5.07784	-0.5155	-0.144857	0.673176	1.27031	-1.28313	0.168209	0.249428	0.428682	0.559531	1.12366	1.18874	1.346	1.47379	0.94479	1.3288	1.71929	2.7177	0.348433	0.188782	0.0905502	0.00851171	0.45788	0.724039	1.04311	2.06998	0.46505	0.278205	0.146632
MAPKAPK2	415	0.0050887	0.159967	0.165055	0.378185	0.0308303	0.96917	0.611843	76.519	80.519	80.7224	80.6779	23.1008	4	62	1.01623e-11	8.46563	8.29908	9.11969	9.3833	8.00545	-0.327675	-0.616416	0.806274	1.26329	-1.12547	0.460172	0.293625	1.11424	1.37785	1.37571	1.22572	2.16481	2.5988	3.2897	1.98876	5.68744	8.51741	0.00165649	0.0511457	3.73106e-07	5.03052e-12	2.78081	1.29119	6.42817	11.2984	0.0039953	0.089302	1.74116e-06
CCL26	416	0.00978486	0.231302	0.241087	0.228796	0.0405864	0.959414	0.0776759	99.8398	103.84	104.043	103.999	0.206163	4	62	0.934065	4.85158	4.77942	4.98764	4.83136	4.84724	-0.101853	-1.03672	1.66056	-0.363811	-0.158176	0.00434792	-0.067821	0.140401	-0.0158744	1.00302	-1.04813	1.10221	-1.01106	0.0258262	-0.381212	0.59541	-0.081531	0.979479	0.704349	0.553736	0.935282	0.00900491	0.152212	0.256697	0.0290573	0.98267	0.786583	0.674114
CD3E	417	0.0774933	0.123359	0.200852	0.625641	0.385823	0.614177	0.832237	71.4336	75.4336	75.637	75.5925	63.4725	4	62	3.10521e-21	8.61318	9.00281	7.44465	7.50568	9.37923	0.255368	0.699418	-1.07638	-1.00682	1.12842	-0.766049	-0.376421	-1.93458	-1.87355	-1.70061	-1.29812	-3.82268	-3.66432	-6.1706	-2.82989	-11.1042	-13.0364	5.71829e-08	0.00626724	2.23323e-16	2.02346e-19	7.24273	2.20292	15.6511	18.6939	3.07371e-07	0.0135247	1.27377e-14
CSF3R	418	0.112818	0.620782	0.7336	1.43669	0.153786	0.846214	0.621346	165.318	169.318	169.521	169.476	21.2968	4	62	4.341e-11	10.7254	9.69057	10.9858	11.7797	9.17261	0.244484	-0.749297	0.494556	1.25696	-1.2467	1.55281	0.51796	1.81322	2.60713	2.93389	1.43193	3.51426	6.09291	5.59768	1.75255	4.66241	8.12229	5.26454e-07	0.0846239	1.70907e-05	2.42842e-11	6.27864	1.07251	4.76724	10.6147	2.37058e-06	0.138271	5.6059e-05
CXCL5	419	0.0328782	0.861926	0.894804	2.25825	0.0367435	0.963257	0.651007	181.22	185.22	185.423	185.378	27.1951	4	62	4.73689e-13	5.08194	4.8281	8.21814	7.30103	4.91481	-0.624682	-0.785358	1.36052	0.779995	-0.730472	0.167127	-0.0867085	3.30333	2.38622	1.12282	-1.06194	9.87189	5.22787	0.514428	-0.252677	7.25959	6.35105	0.608782	0.801354	7.63306e-10	2.81552e-08	0.215538	0.0961758	9.1173	7.55044	0.716214	0.84992	6.02816e-09
PTGFR	420	0.0237015	0.246331	0.270032	0.380658	0.087773	0.912227	0.422126	105.712	109.712	109.916	109.871	8.77629	4	62	1.11235e-05	5.13084	4.98572	5.94655	5.81907	4.99904	-0.524295	-0.834327	1.21841	0.946077	-0.805868	0.131795	-0.0133208	0.947502	0.82003	1.09566	-1.00928	1.92853	1.76544	0.756216	-0.0720093	3.87984	4.06738	0.452384	0.942826	0.000255665	0.000136582	0.344493	0.0255683	3.59233	3.86461	0.576714	0.957636	0.000710052
FCER1G	421	0.0124662	0.342957	0.355423	1.48546	0.0350742	0.964926	0.788686	124.004	128.004	128.208	128.163	55.5544	4	62	7.99845e-20	10.5557	9.99011	12.2432	12.5135	9.57152	-0.314793	-0.739569	0.952635	1.15568	-1.05396	0.984151	0.418588	2.67165	2.942	1.97815	1.33662	6.37158	7.68475	4.80309	1.93447	9.30951	12.4154	1.02755e-05	0.0576222	2.19754e-13	1.82766e-18	4.9882	1.23941	12.6581	17.7381	3.50093e-05	0.0989277	4.5216e-12
PTGIR	422	0.0165152	0.247298	0.263813	0.438099	0.0626019	0.937398	0.49073	104.949	108.949	109.153	109.108	12.8914	4	62	1.07096e-07	5.86487	5.5266	6.74986	6.4012	5.38374	-0.207658	-0.791159	1.31892	0.717492	-1.03759	0.481133	0.142864	1.36612	1.01746	1.39584	1.1041	2.57777	2.02436	2.75933	0.77354	5.59257	5.04487	0.00760448	0.442143	5.36842e-07	4.22931e-06	2.11893	0.354438	6.27015	5.37373	0.0161464	0.565531	2.41031e-06
ATF2	423	0.00810259	0.0695263	0.0776289	0.0770422	0.104376	0.895624	0.198668	27.9028	31.9028	32.1062	32.0617	1.28906	4	62	0.284055	7.83585	7.7381	7.82681	7.7962	7.63941	0.846019	-0.359852	0.734405	0.356799	-1.57737	0.196444	0.0986944	0.187397	0.156787	1.14587	1.0708	1.13871	1.1148	2.11993	1.00229	1.44302	1.46251	0.0380221	0.3201	0.154049	0.148652	1.41996	0.494715	0.812342	0.827829	0.0686851	0.434895	0.232128
MAFF	424	0.0588136	0.31516	0.373973	0.701487	0.157267	0.842733	0.606589	123.399	127.399	127.602	127.557	18.5782	4	62	4.42955e-10	5.73091	5.16192	6.92044	6.44697	5.14925	-0.191911	-0.915148	1.32006	0.718252	-0.931252	0.581667	0.01267	1.77119	1.29773	1.49658	1.00882	3.41335	2.45841	2.94253	0.0601507	6.39107	5.67351	0.00457428	0.952229	2.405e-08	3.93622e-07	2.33968	0.0212586	7.61889	6.40492	0.0102389	0.963165	1.38353e-07
FYN	425	0	0.222171	0.222171	0.458313	0	1	0.54462	95.2784	97.2784	97.3451	97.3579	18.5375	4	62	4.59231e-10	8.47485	8.20912	7.11715	7.35936	8.44259	0.869975	0.452864	-1.26119	-0.880994	0.819341	0.032258	-0.233472	-1.32545	-1.08324	1.02261	-1.17566	-2.5061	-2.11878	0.196396	-1.35349	-5.76292	-5.70387	0.844943	0.180813	2.79012e-07	3.50273e-07	0.0731728	0.742769	6.55438	6.45559	0.88158	0.267872	1.33441e-06
ATG12	426	0.0161717	0.0735325	0.0897042	0.195662	0.180278	0.819722	0.672455	33.88	37.88	38.0834	38.0388	26.1873	4	62	9.80295e-13	8.13512	7.88105	8.57405	8.73472	7.78466	-0.207208	-0.813737	0.840616	1.22418	-1.04386	0.350465	0.0963949	0.78939	0.950064	1.27497	1.0691	1.72834	1.93196	3.66809	0.945955	5.89231	8.59291	0.000509477	0.347843	1.6916e-07	3.72655e-12	3.29288	0.458616	6.7717	11.4287	0.0013454	0.464797	8.24389e-07
TNFRSF11A	427	0.0163276	0.354477	0.370805	0.518438	0.0440329	0.955967	0.377395	126.466	130.466	130.669	130.625	7.94933	4	62	3.07098e-05	4.73243	4.77942	6.12237	5.34545	4.86108	-0.742567	-0.662492	1.62621	0.302163	-0.523309	-0.128655	-0.0816692	1.26129	0.484368	-1.09327	-1.05824	2.39709	1.39897	-0.61713	-0.37056	4.31934	2.00892	0.539409	0.712228	5.75361e-05	0.048905	0.268082	0.147381	4.24006	1.31065	0.660293	0.793368	0.000174765
DDX58	428	0.134463	1.41887	1.55333	5.85483	0.0865642	0.913436	0.783494	214.224	218.224	218.428	218.383	52.2899	4	62	3.39294e-19	11.3576	7.60748	10.8892	12.1648	6.97922	0.664791	-0.935413	0.464909	1.00921	-1.2035	4.37839	0.628266	3.90996	5.18555	20.7982	1.54571	15.0319	36.3919	10.4683	1.41533	6.67154	10.7176	2.47112e-15	0.161976	7.93553e-09	9.57769e-16	14.6071	0.790549	8.10042	15.0187	9.06076e-14	0.243122	5.05331e-08
NFATC3	429	0.0115639	0.0894359	0.101	0.451588	0.114495	0.885505	0.824685	43.8775	47.8775	48.0809	48.0364	66.6978	4	62	9.06056e-22	7.96369	8.5287	6.9126	7.3048	8.74049	0.094388	0.818628	-1.25292	-0.750196	1.0901	-0.776797	-0.211789	-1.82789	-1.43569	-1.71332	-1.15812	-3.55017	-2.70512	-7.38784	-1.89437	-12.4038	-11.8021	4.5725e-10	0.0628426	1.90561e-18	1.68513e-17	9.33985	1.20175	17.72	16.7734	3.78584e-09	0.106877	3.45251e-16
TNFSF15	430	0	0.229695	0.229695	0.29943	0	1	0.279382	97.3434	99.3434	99.41	99.4228	6.00932	4	62	0.000374862	5.01977	4.89091	5.53208	5.59465	4.84869	-0.438848	-0.798035	0.98909	1.1635	-0.915707	0.171084	0.0422173	0.683389	0.745962	1.1259	1.0297	1.60591	1.67709	1.02441	0.240701	2.92224	3.86305	0.309624	0.810581	0.0048439	0.000270225	0.509165	0.0912035	2.31481	3.56827	0.423277	0.857193	0.0108032
NFATC1	431	0.0170891	0.161243	0.178332	0.173549	0.0958276	0.904172	0.172675	79.7432	83.7432	83.9466	83.902	0.873395	4	62	0.485087	6.65113	6.52052	6.78207	6.63597	6.47637	0.31546	-0.771187	1.40489	0.189346	-1.13851	0.17476	0.0441501	0.305704	0.159602	1.12878	1.03108	1.23602	1.11698	1.23888	0.294704	1.5465	0.978023	0.220058	0.769205	0.127074	0.331864	0.657463	0.113958	0.895942	0.47904	0.317164	0.830116	0.196382
FCAR	432	0.067302	0.570391	0.637693	1.94879	0.10554	0.89446	0.740199	158.431	162.431	162.635	162.59	40.2974	4	62	1.33121e-16	9.82633	8.65543	10.8594	11.5647	8.22962	-0.000546434	-0.827995	0.729518	1.22793	-1.1289	1.59672	0.425811	2.62982	3.3351	3.02454	1.34333	6.18947	10.0918	6.01554	1.50956	7.06963	10.8608	1.04785e-07	0.136235	1.62905e-09	5.57397e-16	6.9797	0.865711	8.78807	15.2538	5.24778e-07	0.208987	1.18213e-08
NOTCH2	433	0.0766145	0.176337	0.252952	0.285999	0.302882	0.697118	0.471661	91.5024	95.5024	95.7058	95.6613	5.77446	4	62	0.000513394	9.57873	9.25434	9.31817	9.21938	8.87053	1.30223	0.0240748	0.275585	-0.113686	-1.4882	0.7082	0.38381	0.447642	0.348847	1.63376	1.30478	1.36381	1.27354	4.77572	2.41883	2.15159	2.03232	1.13501e-05	0.0185196	0.0353331	0.0464102	4.945	1.73237	1.45182	1.33339	3.82059e-05	0.0361244	0.064394
CCL21	434	0.0746701	0.340727	0.415397	0.558199	0.179756	0.820244	0.467938	128.932	132.932	133.135	133.091	8.735	4	62	1.16939e-05	5.4377	5.05269	6.36954	5.81557	4.95879	-0.153525	-0.816517	1.45109	0.497164	-0.978212	0.478915	0.0939004	1.41075	0.856785	1.3937	1.06725	2.65875	1.811	2.32861	0.42809	4.89202	3.6	0.0231553	0.670069	7.42719e-06	0.000633176	1.63535	0.17388	5.12918	3.19848	0.0442971	0.763245	2.59657e-05
TYK2	435	0.00404571	0.0762767	0.0803224	0.0916504	0.0503684	0.949632	0.244695	31.4988	35.4988	35.7022	35.6577	3.47086	4	62	0.0127005	7.66116	7.79907	7.83415	7.87868	7.52004	-0.527729	0.411861	0.650862	0.954211	-1.48921	0.141124	0.279036	0.314116	0.358641	1.10276	1.21338	1.24325	1.28222	1.45859	2.72609	2.31767	3.20489	0.149726	0.0083213	0.0237825	0.00213605	0.824701	2.07981	1.62374	2.67039	0.226695	0.0175666	0.0453841
GNLY	436	0.566458	0.262581	0.829039	0.937706	0.683271	0.316729	0.765027	126.037	130.037	130.24	130.196	14.652	4	62	1.7674e-08	9.40767	9.99571	8.70466	8.97613	10.1209	-0.0539327	0.897052	-1.19085	-0.751831	1.09956	-0.713258	-0.125219	-1.41626	-1.1448	-1.6395	-1.09067	-2.66894	-2.21116	-3.93104	-0.64245	-5.55883	-5.44891	0.000215763	0.522949	6.10758e-07	9.2838e-07	3.66602	0.28154	6.21413	6.03227	0.000608005	0.646342	2.6989e-06
IFIT1	437	0.31165	1.64624	1.95789	6.23397	0.159177	0.840823	0.768856	225.956	229.956	230.159	230.114	46.3122	4	62	5.77115e-18	13.7701	9.92624	13.1276	14.5823	9.29674	0.685809	-0.931954	0.415401	1.02763	-1.19689	4.47341	0.6295	3.8309	5.2856	22.2141	1.54703	14.2304	39.0053	9.90102	1.30744	6.04781	10.1101	2.18831e-14	0.195893	9.24005e-08	9.75753e-15	13.6599	0.707982	7.03433	14.0107	6.12726e-13	0.286763	4.71077e-07
ICAM1	438	0.0758072	0.385606	0.461413	1.8071	0.164294	0.835706	0.813429	136.128	140.128	140.331	140.286	60.3329	4	62	1.08146e-20	6.12579	5.41582	8.12531	8.36526	5.27177	-0.36038	-0.838614	0.986505	1.14814	-0.93565	0.854019	0.144055	2.85354	3.0935	1.80753	1.10501	7.22773	8.53562	3.90498	0.617973	9.3063	12.224	0.000235256	0.538857	2.22538e-13	3.63745e-18	3.62846	0.268527	12.6526	17.4392	0.000658718	0.659912	4.53919e-12
JAK2	439	0.0778696	0.504962	0.582832	1.11594	0.133606	0.866394	0.60154	151.854	155.854	156.058	156.013	19.9518	4	62	1.34097e-10	11.2123	9.74803	10.1488	11.0925	9.33324	1.09741	-0.677532	-0.191745	0.9522	-1.18033	1.87903	0.414788	0.815539	1.75924	3.67828	1.3331	1.75996	3.3852	7.51541	1.55863	2.32699	6.08136	2.74593e-10	0.124174	0.0232469	8.10612e-08	9.56131	0.905968	1.63363	7.09119	2.40269e-09	0.192674	0.0444027
PTGS2	440	0.108907	2.00814	2.11705	3.22735	0.0514426	0.948557	0.435615	234.323	238.323	238.526	238.482	9.83137	4	62	3.17582e-06	10.5606	8.65333	6.73141	8.77694	9.16926	1.2986	-0.0910654	-1.49138	-0.00100203	0.284843	1.39138	-0.515933	-2.43785	-0.392321	2.62329	-1.42992	-5.41835	-1.3125	2.80246	-0.982171	-3.50533	-0.683212	0.00675889	0.329833	0.000853429	0.497018	2.17012	0.481706	3.06883	0.303627	0.0144867	0.444784	0.00216699
SLC2A1	441	0.200608	0.398596	0.599204	1.00348	0.33479	0.66521	0.660655	142.88	146.88	147.083	147.039	20.8052	4	62	6.52549e-11	6.17416	5.87776	6.8015	7.84167	5.82405	-0.391166	-0.742851	0.353198	1.5874	-0.806581	0.350107	0.0537104	0.977448	2.01762	1.27466	1.03793	1.96898	4.04915	1.56971	0.224923	3.12325	7.81467	0.121573	0.822779	0.0027183	8.29913e-11	0.915162	0.084717	2.5657	10.081	0.189305	0.865491	0.00635232
CXCL3	442	0.137996	0.267586	0.405582	0.607408	0.340242	0.659758	0.623817	118.309	122.309	122.513	122.468	15.1803	4	62	1.04919e-08	6.32193	6.17985	6.83482	7.51083	6.08712	-0.447778	-0.687864	0.418935	1.56127	-0.844559	0.234805	0.0927285	0.747704	1.42371	1.17675	1.06639	1.67912	2.68274	1.28479	0.473869	2.91571	6.72972	0.203644	0.637258	0.00493381	6.3e-09	0.691128	0.195685	2.30682	8.20066	0.29684	0.739262	0.0109561
NFKBIZ	443	0.00397286	0.214499	0.218472	0.334948	0.0181847	0.981815	0.407285	94.0795	98.0795	98.2829	98.2384	10.0123	4	62	2.57334e-06	8.64317	8.27117	8.13742	9.20927	8.22471	0.330015	-0.510726	-0.81299	1.60941	-0.615709	0.418459	0.0464523	-0.0872917	0.984559	1.3365	1.03272	-1.06237	1.97871	2.5868	0.272556	-0.385324	5.26326	0.0120475	0.7861	0.701316	1.87219e-06	1.9191	0.104522	0.154086	5.72765	0.0243927	0.841462	0.784618
PECAM1	444	0.0227985	0.150707	0.173505	0.213938	0.1314	0.8686	0.379331	76.8127	80.8127	81.0161	80.9716	5.23597	4	62	0.0010658	9.51818	9.38331	10.1072	9.79621	9.42091	-0.416797	-0.859479	1.51656	0.495795	-0.736078	0.0972724	-0.0375954	0.68629	0.375303	1.06975	-1.0264	1.60914	1.29711	0.712206	-0.258641	3.58478	2.37497	0.479009	0.796769	0.000664493	0.0206575	0.319656	0.0986676	3.17751	1.68492	0.602921	0.847939	0.0017141
LEF1	445	0.139504	0.102061	0.241565	0.381474	0.577502	0.422498	0.774682	64.4703	68.4703	68.6737	68.6292	29.2657	4	62	1.11857e-13	7.7323	8.07726	7.22242	7.22121	8.42314	-0.00560466	0.647059	-0.970315	-0.972605	1.30147	-0.690836	-0.345878	-1.20072	-1.20193	-1.61422	-1.27092	-2.29855	-2.30048	-6.10992	-2.8496	-7.56396	-9.18095	7.25028e-08	0.0059345	2.26142e-10	3.64217e-13	7.13965	2.22662	9.64562	12.4386	3.81073e-07	0.012863	1.99575e-09
OAS2	446	0.100535	2.04433	2.14486	8.6862	0.0468725	0.953128	0.78602	235.228	239.228	239.432	239.387	54.4242	4	62	1.30916e-19	11.7865	7.43233	12.1291	13.0762	6.71028	0.532248	-0.953689	0.649155	0.972388	-1.2001	5.07621	0.722053	5.41877	6.36592	33.7358	1.64953	42.7773	82.4772	10.137	1.36349	7.72528	10.9916	8.7976e-15	0.17766	1.18646e-10	3.40617e-16	14.0556	0.750411	9.92575	15.4677	2.68283e-13	0.263961	1.13841e-09
FLT3LG	447	0.0401276	0.0864974	0.126625	0.128849	0.316901	0.683099	0.425545	47.7003	51.7003	51.9037	51.8592	3.27791	4	62	0.0167561	7.48185	7.59672	7.58032	7.42754	7.80597	-0.66599	0.125709	0.0127023	-1.0403	1.56788	-0.324124	-0.209252	-0.225649	-0.378435	-1.2519	-1.15609	-1.1693	-1.29993	-3.12023	-1.88208	-1.54822	-3.14726	0.00274249	0.0645205	0.12666	0.00253325	2.56186	1.1903	0.897361	2.59632	0.0063943	0.109249	0.195967
IFNA2	448	0	0.263001	0.263001	0.578721	0	1	0.57309	105.738	107.738	107.805	107.818	20.8074	4	62	6.51303e-11	5.19692	4.89649	6.17335	6.36595	4.90996	-0.43991	-0.864018	0.938517	1.21042	-0.845005	0.286956	-0.013468	1.26339	1.45599	1.22006	-1.00938	2.40059	2.74345	1.60574	-0.071761	5.04874	7.04646	0.113412	0.943023	4.16911e-06	1.78674e-09	0.945342	0.0254777	5.37996	8.74794	0.17831	0.957636	1.5305e-05
IFNGR2	449	0.115298	0.469869	0.585168	1.42024	0.197035	0.802965	0.712524	149.373	153.373	153.576	153.532	32.664	4	62	1.19886e-14	9.97842	9.00969	10.5138	11.3284	8.48848	0.10054	-0.748944	0.570051	1.28436	-1.206	1.48995	0.521217	2.02536	2.83994	2.80878	1.43517	4.07094	7.15989	6.16652	2.02141	5.97762	10.1566	5.81043e-08	0.0475596	1.21451e-07	8.15652e-15	7.23579	1.32276	6.9156	14.0885	3.11779e-07	0.0839448	6.01397e-07
LCK	450	0.0316797	0.106296	0.137976	0.387673	0.229603	0.770397	0.76296	58.1596	62.1596	62.363	62.3185	43.2763	4	62	2.70419e-17	7.41287	7.65316	6.32171	6.45933	7.76696	0.425104	0.777265	-1.17406	-0.972368	0.944055	-0.354096	-0.113806	-1.44525	-1.30764	-1.27818	-1.08208	-2.7231	-2.47535	-3.07909	-0.926414	-8.9604	-9.82485	0.00309219	0.357823	8.68976e-13	2.94005e-14	2.50973	0.446332	12.061	13.5316	0.00715012	0.474632	1.45459e-11
HLA-B	451	0.308315	0.266504	0.574819	0.769101	0.536369	0.463631	0.707672	122.917	126.917	127.12	127.076	18.8321	4	62	3.53952e-10	13.4162	12.5808	13.1474	13.8084	12.2793	0.597311	-0.752122	0.163088	1.23095	-1.23923	1.13686	0.301532	0.86807	1.5291	2.19903	1.23245	1.82522	2.88607	6.22359	1.53816	3.38505	7.22985	4.64596e-08	0.129098	0.00123909	8.59548e-10	7.33292	0.889082	2.9069	9.06573	2.52373e-07	0.19891	0.00305802
TLR1	452	0.0910172	0.640479	0.731496	1.05611	0.124426	0.875574	0.464672	166.282	170.282	170.485	170.441	10.4505	4	62	1.55456e-06	10.2508	9.21626	9.54577	10.2485	8.67576	0.976099	-0.546097	-0.0612839	0.972636	-1.34135	1.57507	0.5405	0.870006	1.57272	2.9795	1.45448	1.82767	2.97464	5.59554	1.80487	2.20509	4.82908	5.30788e-07	0.0759518	0.0311659	9.34775e-06	6.27508	1.11946	1.50632	5.02929	2.38661e-06	0.125905	0.0576177
KLRB1	453	0.315685	0.205929	0.521614	0.805698	0.605208	0.394792	0.784974	108.731	112.731	112.935	112.89	26.3905	4	62	8.45467e-13	6.59627	7.53798	6.12056	6.31808	7.61884	-0.347316	1.0038	-1.02985	-0.746447	1.11981	-1.02257	-0.0808586	-1.49829	-1.30076	-2.03153	-1.05765	-2.82507	-2.46358	-6.366	-0.46883	-6.64348	-6.99373	2.65458e-08	0.640836	8.86888e-09	2.20455e-09	7.576	0.193253	8.05213	8.65668	1.51409e-07	0.741741	5.57472e-08
CFH	454	0.010199	0.240095	0.250293	0.326455	0.0407481	0.959252	0.329077	102.16	106.16	106.364	106.319	6.56705	4	62	0.000179428	5.57188	5.22993	5.32313	5.86078	4.94041	0.535025	-0.44514	-0.177995	1.36315	-1.27504	0.631469	0.289524	0.382722	0.920374	1.54914	1.22224	1.3038	1.89261	3.68149	1.59725	1.59302	4.63961	0.000488019	0.115296	0.116242	1.85492e-05	3.31156	0.938186	0.934639	4.73167	0.00129243	0.180902	0.182108
TAGAP	455	0.0718901	0.264195	0.336085	0.617068	0.213904	0.786096	0.628993	114.164	118.164	118.368	118.323	19.0208	4	62	2.99908e-10	10.2044	9.53397	8.23472	9.66176	9.22949	1.14303	0.221475	-1.56456	0.397144	-0.197088	0.974872	0.304484	-0.994771	0.432275	1.96547	1.23498	-1.99276	1.34936	5.37876	1.57338	-3.91358	2.06086	1.21118e-06	0.12072	0.000228642	0.0435177	5.91679	0.91822	3.64084	1.36133	5.06851e-06	0.188358	0.000641949
CD38	456	0	0.433488	0.433488	0.768406	0	1	0.470051	136.72	138.72	138.787	138.8	13.7481	4	62	4.40144e-08	9.06072	8.66082	9.29965	10.4296	8.80078	-0.269578	-0.838141	0.0701386	1.67673	-0.639147	0.259932	-0.13996	0.498869	1.62885	1.19742	-1.10187	1.41311	3.09266	1.13295	-0.580871	1.55283	6.1402	0.261597	0.563433	0.125555	6.4409e-08	0.582368	0.249158	0.901166	7.19105	0.368719	0.682143	0.194718
PYCARD	457	0.018763	0.240322	0.259085	0.808771	0.0724203	0.92758	0.733061	103.578	107.578	107.782	107.737	39.0317	4	62	2.68807e-16	9.35376	8.38331	9.89814	10.0746	8.07187	0.220512	-0.863448	0.82857	1.02568	-1.21131	1.28189	0.311439	1.82627	2.00274	2.43157	1.24094	3.54618	4.0076	7.453	1.70803	7.57865	10.0665	3.52408e-10	0.092634	2.13241e-10	1.15447e-14	9.45295	1.03323	9.67113	13.9376	3.01505e-09	0.149457	1.89313e-09
FXYD2	458	0	0.301125	0.301125	0.41861	0	1	0.324252	114.131	116.131	116.198	116.211	7.43753	4	62	5.84479e-05	5.28956	4.87483	5.87227	5.69416	4.84869	-0.0566107	-0.947855	1.19563	0.812865	-1.00403	0.44087	0.0261411	1.02359	0.84547	1.35742	1.01828	2.03296	1.79685	2.30556	0.130171	3.82274	3.82397	0.024494	0.896853	0.000308515	0.000307273	1.61094	0.047279	3.51072	3.51248	0.0464828	0.921998	0.000846149
EIF2A	459	0.0181674	0.058415	0.0765824	0.146269	0.237227	0.762773	0.655115	21.2548	25.2548	25.4581	25.4136	21.435	4	62	3.87473e-11	8.03193	8.12756	7.22017	7.81971	8.2474	0.351545	0.587353	-1.65001	-0.171731	0.882842	-0.215475	-0.11984	-1.02723	-0.427697	-1.16109	-1.08661	-2.03811	-1.34508	-2.52717	-1.31548	-8.58957	-4.33414	0.0140633	0.193191	3.77633e-12	5.46472e-05	1.85191	0.714012	11.4229	4.26243	0.0281266	0.283482	5.23923e-11
BST2	460	0.0660727	0.506591	0.572663	1.69468	0.115378	0.884622	0.735453	151.428	155.428	155.631	155.587	39.0978	4	62	2.5902e-16	10.4253	8.56585	10.298	10.8733	8.13811	0.625911	-0.895094	0.521782	0.992379	-1.24498	2.28722	0.427743	2.15992	2.73524	4.88114	1.34513	4.46889	6.65868	9.13964	1.60743	6.15815	9.44722	4.28523e-13	0.113041	6.00398e-08	1.28096e-13	12.368	0.946766	7.22156	12.8925	7.76383e-12	0.177858	3.21046e-07
PDGFB	461	0	0.373075	0.373075	0.564987	0	1	0.379695	127.415	129.415	129.482	129.494	9.4877	4	62	4.75308e-06	5.18687	4.80293	6.20763	5.78988	4.84869	-0.294013	-0.919996	1.37024	0.689147	-0.845383	0.338178	-0.0457632	1.35894	0.941192	1.26416	-1.03223	2.56496	1.92011	1.58887	-0.20473	4.55959	3.82446	0.117178	0.838453	2.46921e-05	0.000306778	0.931155	0.0765211	4.60744	3.51318	0.183388	0.876293	7.92204e-05
ITGAL	462	0.00959005	0.0792813	0.0888713	0.0956724	0.107909	0.892091	0.264984	36.1708	40.1708	40.3742	40.3297	3.02535	4	62	0.0241092	9.41366	9.2693	9.27798	9.37612	9.08598	1.01423	-0.12028	-0.0520875	0.719203	-1.56106	0.327685	0.183328	0.192005	0.290145	1.255	1.1355	1.14235	1.22276	3.31099	1.74283	1.3843	2.53407	0.00155315	0.0863219	0.171229	0.0138153	2.80879	1.06388	0.766424	1.85964	0.00377859	0.140662	0.255392
LTB4R2	463	0.0436198	0.449829	0.493449	1.61774	0.0883979	0.911602	0.751751	143.072	147.072	147.276	147.231	42.6679	4	62	3.72013e-17	5.36732	4.82723	7.67746	7.39371	4.92838	-0.484841	-0.874802	1.18314	0.978265	-0.801763	0.438934	-0.101159	2.74907	2.46532	1.3556	-1.07263	6.72286	5.5225	1.86366	-0.404637	8.32989	9.04853	0.0671072	0.687137	1.06112e-11	6.13649e-13	1.17323	0.162957	10.9742	12.2121	0.112822	0.774097	1.33945e-10
XCL1	464	0.00971798	0.234095	0.243813	0.313475	0.0398583	0.960142	0.318409	100.551	104.551	104.754	104.71	6.0443	4	62	0.000357784	5.06923	4.98901	5.35062	5.76087	4.91033	-0.423052	-0.654277	0.387971	1.57041	-0.881049	0.158904	0.0786794	0.440291	0.850542	1.11644	1.05605	1.35688	1.80318	0.938282	0.439665	1.85613	4.34253	0.351741	0.661709	0.068188	5.30721e-05	0.453778	0.179333	1.16629	4.27513	0.468375	0.756045	0.114514
PSMB5	465	0	0.138321	0.138321	0.369346	0	1	0.648194	65.8985	67.8985	67.9652	67.9779	28.5584	4	62	1.81783e-13	7.1485	6.78676	8.03167	7.73601	6.53108	-0.155976	-0.729929	1.24531	0.7762	-1.1356	0.617418	0.255679	1.50059	1.20493	1.53413	1.1939	2.82958	2.30526	4.76403	1.87851	8.26878	8.04095	1.18418e-05	0.0650144	1.35374e-11	3.36023e-11	4.92658	1.18699	10.8685	10.4736	3.97741e-05	0.109931	1.63456e-10
PLA2G6	466	0.0337175	0.353789	0.387506	0.650796	0.0870116	0.912988	0.514411	128.129	132.129	132.332	132.288	13.9851	4	62	3.45627e-08	5.24283	4.8539	5.87687	6.3929	4.95087	-0.3367	-0.930197	0.630834	1.41829	-0.782225	0.29196	-0.0969683	0.926	1.44203	1.2243	-1.06952	1.9	2.71703	1.39789	-0.43744	3.16411	5.9685	0.167128	0.663312	0.00241044	1.2584e-07	0.776952	0.178282	2.6179	6.90018	0.250245	0.757228	0.00568031
CMA1	467	0.0955665	0.193347	0.288913	0.338328	0.330779	0.669221	0.511599	97.9237	101.924	102.127	102.083	5.76961	4	62	0.000516755	5.73005	5.8202	4.98886	5.74985	6.02146	0.172679	0.401709	-1.7104	0.222972	0.913038	-0.291411	-0.201263	-1.0326	-0.271615	-1.22384	-1.1497	-2.04571	-1.20716	-1.87604	-1.21028	-4.73774	-1.51059	0.0653593	0.230764	1.30247e-05	0.135973	1.18469	0.636832	4.88523	0.866547	0.110305	0.330583	4.35097e-05
NOD1	468	0	0.193231	0.193231	0.474907	0	1	0.617777	86.6255	88.6255	88.6922	88.705	25.0523	4	62	2.2704e-12	6.67128	6.03766	7.40391	7.14673	5.85319	0.0722067	-0.866707	1.15783	0.776732	-1.14006	0.818092	0.18447	1.55072	1.29354	1.76307	1.1364	2.92963	2.45128	5.34076	1.1467	7.22968	7.3035	1.39823e-06	0.255912	8.60135e-10	6.40497e-10	5.85442	0.591909	9.06543	9.19348	5.7574e-06	0.36173	6.67309e-09
ATG7	469	0.0669027	0.187432	0.254335	0.481147	0.26305	0.73695	0.664713	94.2397	98.2397	98.443	98.3985	23.4101	4	62	7.97497e-12	7.07907	6.98226	7.71062	8.28258	6.77472	-0.462468	-0.618599	0.555991	1.47837	-0.953291	0.304358	0.207541	0.9359	1.50786	1.23487	1.15472	1.91308	2.84388	1.99191	1.27045	4.36645	8.52614	0.0507904	0.20867	4.88191e-05	4.85889e-12	1.29422	0.680539	4.31141	11.3135	0.088732	0.30302	0.000150063
CCL20	470	0.0655437	0.416088	0.481631	0.969224	0.136087	0.863913	0.622206	139.935	143.935	144.138	144.094	21.7572	4	62	2.97756e-11	5.29387	5.01704	6.32314	6.97357	4.95125	-0.467113	-0.776541	0.68336	1.41038	-0.850084	0.342624	0.0657953	1.37189	2.02232	1.26806	1.04666	2.5881	4.06237	1.50951	0.272305	4.31184	7.70053	0.136248	0.786292	5.90572e-05	1.30985e-10	0.865669	0.104416	4.22873	9.88278	0.208987	0.841462	0.000178855
PRKCB	471	0.0280347	0.401537	0.429572	0.93422	0.065262	0.934738	0.612692	135.112	139.112	139.315	139.271	22.5542	4	62	1.56675e-11	9.89965	8.95936	10.2387	10.8105	8.76143	0.1918	-0.896339	0.584108	1.24583	-1.1254	1.13822	0.197935	1.47723	2.04904	2.2011	1.14706	2.78413	4.1383	5.12198	0.840709	4.74494	7.97163	3.17607e-06	0.403742	1.26899e-05	4.4322e-11	5.49811	0.393896	4.89654	10.3534	1.19578e-05	0.524251	4.24837e-05
C5aR1	472	0.0352779	0.347211	0.382489	0.997414	0.0922325	0.907768	0.689633	127.164	131.164	131.367	131.323	31.0083	4	62	3.48869e-14	9.27846	8.70614	10.4261	10.5083	8.27488	-0.159596	-0.729378	0.982941	1.06476	-1.15873	1.00359	0.431264	2.15122	2.2334	2.00498	1.34841	4.44203	4.70242	4.84914	1.96258	7.41764	9.32838	8.68826e-06	0.0541866	4.05918e-10	2.04068e-13	5.06107	1.26611	9.39156	12.6902	3.00672e-05	0.0941312	3.41959e-09
LGALS3	473	0.0962584	0.282633	0.378892	0.389066	0.254053	0.745947	0.374056	119.463	123.463	123.666	123.622	2.79865	4	62	0.0334423	11.9299	12.0171	11.8237	12.3246	11.6169	-0.0481787	0.286449	-0.455554	1.46594	-1.24865	0.312959	0.400195	0.206758	0.707683	1.24225	1.31969	1.15409	1.63318	1.66819	1.99569	0.785692	3.25921	0.100321	0.0503654	0.43504	0.00181585	0.99861	1.29787	0.361471	2.74092	0.160513	0.0880895	0.558069
MRC1	474	0.0613816	0.214254	0.275635	0.431605	0.222691	0.777309	0.570413	101.423	105.423	105.627	105.582	14.7213	4	62	1.64975e-08	5.20334	5.27018	5.7818	6.35166	5.12258	-0.660057	-0.531268	0.454497	1.55249	-0.815658	0.0807579	0.1476	0.659219	1.22908	1.05757	1.10773	1.57923	2.34418	0.494698	0.846574	2.87926	6.50549	0.622562	0.400489	0.00546427	1.53116e-08	0.205817	0.39741	2.26247	7.81498	0.727149	0.520906	0.0120645
ENTPD1	475	0.107738	0.287151	0.394889	0.521361	0.27283	0.72717	0.526501	120.949	124.949	125.152	125.108	9.90224	4	62	2.92416e-06	7.10564	6.71581	6.14374	7.27936	6.23021	0.809143	0.0410985	-1.08602	1.15142	-0.915645	0.875423	0.485599	-0.0864724	1.04915	1.83455	1.40017	-1.06177	2.0693	4.6281	2.40069	-0.325881	4.79202	1.9331e-05	0.0193785	0.745612	1.06975e-05	4.71374	1.71268	0.127487	4.97072	6.27393e-05	0.0375618	0.815224
SMAD7	476	0.107796	0.319888	0.427684	0.808551	0.252046	0.747954	0.659013	127.085	131.085	131.289	131.244	23.37	4	62	8.22865e-12	7.3003	6.46161	8.27608	7.91166	6.3425	0.0488506	-0.929754	1.18743	0.762217	-1.06874	0.957799	0.119116	1.93358	1.56917	1.94234	1.08607	3.82003	2.96734	4.79911	0.558393	6.90693	6.79316	1.04256e-05	0.578587	3.11491e-09	4.89693e-09	4.9819	0.237631	8.50655	8.31008	3.54815e-05	0.695176	2.13198e-08
IDO1	477	0.475419	0.894058	1.36948	3.33668	0.347154	0.652846	0.771329	193.275	197.275	197.479	197.434	38.647	4	62	3.33871e-16	12.6864	10.581	13.1078	13.8484	9.95802	0.386913	-0.866182	0.637733	1.07852	-1.23698	2.72838	0.622998	3.1498	3.89038	6.62713	1.54007	8.87531	14.8294	8.16671	1.7414	6.71897	10.0596	2.03397e-11	0.0865733	6.57456e-09	1.18553e-14	10.6917	1.06262	8.18213	13.9261	2.30318e-10	0.140933	4.26308e-08
CCR3	478	0.0937114	0.303202	0.396914	0.372416	0.2361	0.7639	0.296806	123.327	127.327	127.53	127.486	0.44201	4	62	0.77776	6.38408	6.40818	6.1754	6.18095	6.33043	0.795051	1.01209	-1.0845	-1.03449	0.31185	0.0536493	0.0777471	-0.155036	-0.149483	1.03789	1.05537	-1.11345	-1.10917	0.276188	0.374617	-0.569039	-0.664912	0.783322	0.709224	0.571386	0.508573	0.10606	0.149217	0.243071	0.293647	0.83976	0.790594	0.689603
BCAP31	479	0.000356049	0.0615043	0.0618604	0.0649277	0.00575569	0.994244	0.114645	15.9707	19.9707	20.1741	20.1296	1.82003	4	62	0.136281	7.6406	7.66778	7.58345	7.84296	7.6061	-0.268066	-0.00388056	-0.823506	1.6988	-0.60335	0.0344956	0.0616763	-0.0226506	0.236857	1.0242	1.04368	-1.01582	1.17842	0.39884	0.678267	-0.187021	2.36841	0.691381	0.500126	0.852255	0.020996	0.160282	0.30092	0.0694306	1.67786	0.778025	0.623387	0.887105
PRDM1	480	0.0269698	0.255363	0.282332	0.487628	0.095525	0.904475	0.533629	108.238	112.238	112.441	112.397	14.8665	4	62	1.42863e-08	8.51724	7.60311	7.20392	7.73378	7.38124	1.63811	-0.167387	-0.955824	0.0906949	-0.605595	1.136	0.221868	-0.177323	0.352536	2.19771	1.16624	-1.13078	1.2768	6.39936	1.17686	-0.712825	1.71666	2.3277e-08	0.24375	0.478629	0.0910341	7.63307	0.613056	0.320001	1.0408	1.34509e-07	0.347248	0.602688
ITGA4	481	0.000971993	0.181208	0.18218	1.24185	0.00533533	0.994665	0.863571	82.9411	86.9411	87.1445	87.1	97.4805	4	62	5.01633e-26	9.96909	10.3427	7.56109	8.09129	10.4134	0.514965	0.792329	-1.27289	-0.879232	0.844826	-0.444279	-0.0707065	-2.85228	-2.32208	-1.36063	-1.05023	-7.22142	-5.00052	-2.99281	-0.453068	-13.7212	-13.5281	0.00396504	0.652082	1.89235e-20	3.66879e-20	2.40175	0.185698	19.723	19.4355	0.00895332	0.749967	2.91423e-17
IRF1	482	0.0564718	0.386041	0.442512	0.757896	0.127616	0.872384	0.550766	135.002	139.002	139.206	139.161	15.3434	4	62	8.94629e-09	11.231	10.3064	10.204	10.4052	9.55167	1.48597	-0.0554115	-0.22616	0.109278	-1.31367	1.67937	0.754772	0.652348	0.853561	3.20288	1.68736	1.57172	1.80696	7.68374	3.24545	2.12939	3.37542	1.40081e-10	0.00189241	0.0371998	0.00127624	9.85362	2.72298	1.42946	2.89407	1.31539e-09	0.0045359	0.0673973
CCL23	483	0	0.469936	0.469936	2.65975	0	1	0.834024	141.726	143.726	143.792	143.805	77.887	4	62	1.77999e-23	4.95348	4.78449	8.27491	8.25822	4.84869	-0.680993	-0.771578	1.09934	1.09039	-0.737163	0.104793	-0.0642038	3.42622	3.40953	1.07534	-1.04551	10.7497	10.626	0.438684	-0.25592	10.2428	12.3443	0.662416	0.798859	5.85614e-15	2.35914e-18	0.178869	0.0975296	14.2324	17.6272	0.756485	0.849248	1.89862e-13
RAF1	484	0.0468206	0.187732	0.234553	0.252689	0.199616	0.800384	0.354718	92.5674	96.5674	96.7708	96.7263	2.61523	4	62	0.043585	8.40161	8.61735	8.84546	8.31575	8.28039	-0.381881	0.52845	1.49097	-0.744166	-0.893377	0.12122	0.33696	0.565069	0.0353615	1.08765	1.26309	1.47946	1.02481	0.793664	2.06714	2.63824	0.200061	0.430418	0.042902	0.0105232	0.842088	0.36611	1.36752	1.97785	0.0746427	0.55283	0.0764689	0.021782
LTB4R	485	0.0801802	0.364152	0.444332	1.37323	0.180451	0.819549	0.768886	133.075	137.075	137.279	137.234	45.798	4	62	7.45712e-18	6.51334	5.77447	8.0057	8.22788	5.52199	-0.23609	-0.826747	0.956903	1.13451	-1.02858	0.991352	0.252477	2.48371	2.70589	1.98805	1.19125	5.59335	6.5246	4.66251	1.11335	8.33089	10.9975	1.70845e-05	0.269855	1.0569e-11	3.33159e-16	4.7674	0.56887	10.976	15.4773	5.6059e-05	0.377797	1.33945e-10
IRGC	486	0.100635	0.658074	0.758709	2.80983	0.132639	0.867361	0.793713	168.241	172.241	172.445	172.4	54.6068	4	62	1.20834e-19	6.65752	5.34142	8.7011	8.9695	5.06648	-0.158477	-0.878468	0.959497	1.10632	-1.02888	1.59104	0.274939	3.63463	3.90302	3.01266	1.20994	12.4203	14.9598	5.57451	0.905068	9.0849	11.8191	5.75253e-07	0.368933	5.31659e-13	1.58351e-17	6.24014	0.433052	12.2744	16.8004	2.56408e-06	0.487061	9.41098e-12
S100A9	487	0.481822	1.43954	1.92136	5.45872	0.250771	0.749229	0.772673	220.305	224.305	224.509	224.464	45.5538	4	62	8.42836e-18	15.7878	13.8381	17.5649	18.4745	12.7794	0.0410707	-0.76885	0.779299	1.15715	-1.20867	3.00842	1.05875	4.78551	5.69508	8.04682	2.08313	27.5792	51.8073	7.10594	2.33978	8.05842	11.6225	1.40945e-09	0.0225303	3.13379e-11	3.25808e-17	8.85095	1.64723	10.5039	16.487	1.03854e-08	0.0431819	3.39861e-10
TOLLIP	488	0.0808254	0.539001	0.619827	1.47709	0.1304	0.8696	0.678402	155.791	159.791	159.994	159.95	28.999	4	62	1.34217e-13	6.83823	6.10305	7.95446	8.51781	5.75138	-0.164613	-0.786007	0.778854	1.25501	-1.08325	1.08685	0.351669	2.20308	2.76643	2.1241	1.27604	4.60462	6.80423	4.20797	1.2794	6.08521	9.25732	8.45659e-05	0.205524	7.98513e-08	2.69735e-13	4.0728	0.687137	7.09772	12.5691	0.00025117	0.299248	4.14742e-07
CLU	489	0.70795	0.34022	1.04817	1.79335	0.675415	0.324585	0.840775	141.858	145.858	146.062	146.017	50.0734	4	62	9.41742e-19	7.46634	6.93866	9.57708	9.2375	6.7437	-0.397635	-0.796299	1.19704	0.940486	-0.943594	0.72264	0.194962	2.83338	2.4938	1.6502	1.14469	7.12744	5.6326	3.49903	0.878827	9.77043	10.4282	0.00087041	0.382889	3.63171e-14	2.88017e-15	3.06028	0.416928	13.4399	14.5406	0.00220284	0.503113	9.48392e-13
IL1B	490	0.297091	0.645096	0.942187	1.65975	0.315321	0.684679	0.667353	172.236	176.236	176.439	176.395	22.9916	4	62	1.10749e-11	9.68333	8.03032	8.18129	9.49258	7.3186	1.1288	-0.504945	-0.355742	0.940271	-1.20838	2.36474	0.71173	0.862692	2.17399	5.15058	1.63777	1.81843	4.51269	8.33597	2.34419	2.16748	6.62059	1.03576e-11	0.0222873	0.0340474	9.71077e-09	10.9847	1.65194	1.46792	8.01275	1.31823e-10	0.0427946	0.062383
PML	491	0.0567643	0.601684	0.658448	2.3131	0.0862092	0.913791	0.767581	161.022	165.022	165.225	165.181	47.6633	4	62	2.97263e-18	7.87682	5.93274	8.50779	8.90704	5.50715	0.345207	-0.919813	0.755778	1.01557	-1.19674	2.36967	0.425585	3.00063	3.39988	5.16823	1.34312	8.00352	10.5552	8.7005	1.47234	7.86255	10.791	2.43131e-12	0.145988	6.85362e-11	7.25379e-16	11.6142	0.835681	10.1641	15.1394	3.49928e-11	0.221828	6.97842e-10
HSH2D	492	0.0697986	0.398258	0.468057	1.17279	0.149124	0.850876	0.702099	137.647	141.647	141.851	141.806	32.0832	4	62	1.73665e-14	8.96463	7.50457	8.15163	9.2118	6.9499	0.846256	-0.682697	-0.00510534	1.10509	-1.26354	2.01473	0.554671	1.20173	2.2619	4.04104	1.46883	2.30015	4.79621	9.06892	2.34395	3.85861	8.79925	5.66235e-13	0.0223004	0.000274213	1.64381e-12	12.247	1.65169	3.56191	11.7841	9.96574e-12	0.0427946	0.000756111
REPS1	493	0.0100574	0.0794511	0.0895085	0.0943881	0.112362	0.887638	0.254399	36.4625	40.4625	40.6659	40.6214	2.26712	4	62	0.0719875	7.00691	7.03327	7.05158	7.26549	7.20889	-0.916417	-0.68927	-0.531432	1.31251	0.824605	-0.201975	-0.175624	-0.157313	0.0566022	-1.15027	-1.12945	-1.11521	1.04001	-2.03823	-1.66703	-1.13272	0.49372	0.0457985	0.100552	0.261695	0.623248	1.33915	0.997609	0.582205	0.205339	0.0811619	0.160662	0.368719
CXCR3	494	0.0109809	0.214503	0.225484	0.588566	0.0486992	0.951301	0.668963	95.5304	99.5304	99.7338	99.6893	29.4185	4	62	1.0082e-13	5.88067	5.66112	7.14244	7.09595	5.56388	-0.494512	-0.774227	1.11305	1.05381	-0.898125	0.316795	0.0972476	1.57857	1.53207	1.24556	1.06973	2.98673	2.89201	1.95274	0.566723	6.94649	8.16528	0.0553683	0.572948	2.66097e-09	2.04559e-11	1.25674	0.241885	8.57496	10.6892	0.0958597	0.690551	1.85006e-08
MAP3K5	495	0.00393966	0.259916	0.263855	0.466178	0.0149311	0.985069	0.482718	105.819	109.819	110.022	109.978	13.9502	4	62	3.58099e-08	9.02229	8.23731	7.64886	8.76778	8.04047	1.22617	-0.19149	-1.25423	0.766528	-0.546983	0.981817	0.196841	-0.391609	0.727308	1.97495	1.14619	-1.31186	1.65555	5.51569	1.05014	-1.571	3.53345	7.20064e-07	0.297731	0.121274	0.000781349	6.14263	0.526176	0.916234	3.10715	3.13248e-06	0.410847	0.188934
TBX21	496	0.138149	0.129535	0.267684	0.408443	0.516088	0.483912	0.732204	77.6757	81.6757	81.8791	81.8346	22.667	4	62	1.43221e-11	6.92553	7.26481	6.0087	6.39126	7.31495	0.254566	0.852387	-1.36087	-0.686802	0.940723	-0.389422	-0.0501341	-1.30625	-0.923686	-1.30987	-1.03536	-2.47298	-1.89696	-3.05817	-0.366931	-7.30737	-6.26516	0.00328567	0.71492	6.3067e-10	3.94658e-08	2.48338	0.145743	9.2002	7.40378	0.0075465	0.793536	5.12523e-09
C14orf166	497	0	0.0586272	0.0586272	0.0670787	0	1	0.178964	12.6789	14.6789	14.7456	14.7584	3.37858	4	62	0.0144988	8.27559	8.31344	8.33766	8.59016	8.4109	-0.882561	-0.578763	-0.384383	1.64225	0.203462	-0.135309	-0.0974582	-0.0732402	0.17926	-1.09833	-1.06989	-1.05208	1.1323	-1.60367	-1.09985	-0.619904	1.83748	0.113869	0.275651	0.537593	0.0709318	0.943595	0.55964	0.269546	1.14916	0.178937	0.384404	0.659151
XCR1	498	0	0.399191	0.399191	0.794004	0	1	0.527714	131.61	133.61	133.677	133.689	17.3191	4	62	1.38005e-09	5.34492	4.91472	6.6158	6.38805	4.84869	-0.334727	-0.853619	1.19815	0.923451	-0.933256	0.49623	0.066026	1.76711	1.53936	1.41052	1.04683	3.40372	2.90666	2.25389	0.285554	5.7319	6.04702	0.027748	0.776172	3.14447e-07	9.26859e-08	1.55677	0.110042	6.50245	7.03299	0.0519599	0.835585	1.49e-06
IL15	499	0.0861439	0.142374	0.228518	0.222577	0.376967	0.623033	0.455391	80.1035	84.1035	84.3069	84.2623	1.88935	4	62	0.123537	6.71987	6.51069	6.58241	6.46941	6.3736	1.45462	-0.158086	0.394847	-0.476363	-1.21502	0.34627	0.137091	0.208811	0.0958086	1.27127	1.09969	1.15573	1.06866	2.59652	0.959541	1.11575	0.620596	0.011745	0.341013	0.268835	0.53714	1.93015	0.467229	0.570514	0.269912	0.02384	0.457258	0.37654
SMAD2	500	0	0.0917498	0.0917498	0.115111	0	1	0.251249	40.4467	42.4467	42.5133	42.5261	5.20113	4	62	0.00111788	8.31426	8.47934	7.84318	8.376	8.42046	0.10821	0.755155	-1.73793	0.350159	0.52441	-0.106202	0.0588795	-0.577284	-0.0444638	-1.07639	1.04166	-1.49204	-1.0313	-1.00617	0.531159	-3.90581	-0.36433	0.318247	0.597206	0.000234612	0.716852	0.497236	0.223876	3.62965	0.144571	0.433142	0.710364	0.00065751
ITLN2	501	0	0.289221	0.289221	0.535507	0	1	0.492644	111.63	113.63	113.697	113.71	15.0506	4	62	1.1916e-08	5.43052	4.91699	6.10806	6.33626	5.1098	-0.241919	-1.07123	0.852237	1.22076	-0.759855	0.320722	-0.192811	0.998258	1.22646	1.24896	-1.14299	1.99759	2.33992	1.71141	-0.979668	3.8041	5.66016	0.0920051	0.331057	0.00032793	4.14331e-07	1.03619	0.480097	3.48422	6.38265	0.148754	0.446044	0.000896205
NCAM1	502	0.0219954	0.334311	0.356307	0.596992	0.0617317	0.938268	0.494577	123.605	127.605	127.808	127.763	13.3403	4	62	6.70032e-08	5.66067	5.37498	6.34414	6.61707	5.12833	-0.258945	-0.709003	0.817775	1.24774	-1.09757	0.532332	0.246648	1.2158	1.48873	1.44627	1.18645	2.3227	2.80642	2.62592	1.14877	4.28103	6.34907	0.0108714	0.255064	6.57198e-05	2.8375e-08	1.96371	0.593351	4.1823	7.54706	0.022219	0.361028	0.000198448
MAP2K6	503	0.0128758	0.115632	0.128508	0.139637	0.100195	0.899805	0.263688	59.2901	63.2901	63.4935	63.449	2.72836	4	62	0.0370156	6.1919	6.27635	6.00769	6.5136	6.35242	-0.407306	0.0423542	-1.38823	1.30572	0.447457	-0.160523	-0.0760775	-0.344738	0.161181	-1.11769	-1.05415	-1.26992	1.1182	-1.34349	-0.599367	-2.05888	1.16607	0.184009	0.551112	0.043713	0.24805	0.735161	0.25876	1.35939	0.60546	0.272082	0.671716	0.0777793
ABL1	504	0.0097918	0.422682	0.432474	1.30831	0.0226414	0.977359	0.701923	136.361	140.361	140.564	140.519	35.2299	4	62	2.45372e-15	5.25021	4.94531	7.45487	7.03235	4.8766	-0.536672	-0.783971	1.25153	0.90882	-0.839703	0.373607	0.0687128	2.57827	2.15575	1.29559	1.04878	5.97224	4.456	1.64444	0.286872	8.1033	8.20528	0.105147	0.775167	2.61969e-11	1.74385e-11	0.978202	0.110605	10.5818	10.7585	0.166763	0.834795	2.8714e-10
BCL2L11	505	0.0327704	0.0792687	0.112039	0.152527	0.292491	0.707509	0.554183	41.661	45.661	45.8644	45.8199	11.1704	4	62	6.90205e-07	7.45259	7.38056	8.10468	7.53348	7.19316	-0.233781	-0.443451	1.66451	0.00171162	-0.988989	0.259425	0.187401	0.911518	0.340321	1.197	1.13871	1.88102	1.26604	2.60962	1.7621	6.53571	2.95758	0.0113481	0.082982	1.35879e-08	0.00438338	1.94508	1.08102	7.86685	2.35819	0.0231317	0.136022	8.27092e-08
VCAM1	506	0.00946516	0.368695	0.37816	0.453641	0.0250295	0.97497	0.251358	128.007	132.007	132.21	132.166	4.47489	4	62	0.00305739	5.07432	4.79601	5.80056	5.45067	4.85191	-0.283037	-0.937412	1.42454	0.601868	-0.805963	0.222403	-0.0559061	0.948646	0.598757	1.16668	-1.03951	1.93006	1.51441	1.04787	-0.249761	3.1915	2.43952	0.298765	0.803598	0.00222275	0.0175812	0.52467	0.0949614	2.65311	1.75495	0.411905	0.851421	0.00525811
MMP9	507	0.490758	0.677219	1.16798	1.80825	0.420178	0.579822	0.682088	177.858	181.858	182.061	182.017	22.9109	4	62	1.18035e-11	8.76722	8.45781	10.2846	10.2777	7.46308	-0.231328	-0.484376	1.00964	1.00396	-1.2979	1.30414	0.994732	2.82153	2.81458	2.46937	1.99271	7.06913	7.03516	4.48215	3.18935	6.90928	8.35567	3.25032e-05	0.00223697	3.08581e-09	9.57565e-12	4.48807	2.65034	8.51063	11.0188	0.0001031	0.00528771	2.11677e-08
NT5E	508	0	0.315999	0.315999	0.501224	0	1	0.407754	117.12	119.12	119.187	119.2	10.6716	4	62	1.20891e-06	4.71796	4.79516	5.95754	5.7069	4.84869	-0.838676	-0.705809	1.29477	0.863388	-0.613672	-0.130733	-0.0535339	1.10885	0.858209	-1.09485	-1.0378	2.15674	1.81279	-0.667393	-0.260225	4.04254	3.78914	0.506998	0.795552	0.000148528	0.000344362	0.294994	0.0993313	3.82819	3.46298	0.629405	0.847269	0.000426343
CFB	509	0.0368811	0.312682	0.349563	0.486109	0.105506	0.894494	0.429037	121.16	125.16	125.363	125.318	8.50344	4	62	1.55001e-05	4.77895	4.79734	6.01122	5.50369	4.86088	-0.7499	-0.716376	1.49592	0.570935	-0.600583	-0.0819292	-0.0635349	1.15034	0.642806	-1.05843	-1.04502	2.21967	1.56136	-0.416889	-0.304217	4.17671	2.82727	0.678199	0.761981	9.41393e-05	0.00631269	0.168643	0.118056	4.02623	2.19979	0.768481	0.824632	0.000276933
MAPK1	510	0	0.101404	0.101404	0.180819	0	1	0.473184	46.6495	48.6495	48.7162	48.729	13.922	4	62	3.68518e-08	9.79251	9.94094	8.94148	9.39643	9.78313	0.546517	0.912579	-1.55224	-0.430257	0.523401	0.00937338	0.157809	-0.841655	-0.3867	1.00652	1.11559	-1.7921	-1.3074	0.0844711	1.35415	-5.41666	-3.01396	0.932954	0.180604	1.04924e-06	0.00373208	0.0301398	0.743273	5.97913	2.42805	0.950231	0.26769	4.45745e-06
MKNK1	511	0.0403229	0.329132	0.369455	1.07866	0.109141	0.890859	0.729458	124.469	128.469	128.673	128.628	37.9859	4	62	4.8629e-16	8.76558	7.56719	8.75606	9.63427	7.18865	0.385978	-0.821004	0.376386	1.2609	-1.20226	1.57693	0.378543	1.56741	2.44562	2.98335	1.30003	2.96372	5.44761	7.81973	1.76598	5.54591	10.4826	8.13305e-11	0.0823232	6.41648e-07	2.34014e-15	10.0897	1.08448	6.1927	14.6308	8.10673e-10	0.135014	2.81521e-06
BLNK	512	0	0.105299	0.105299	0.120436	0	1	0.178673	48.9866	50.9866	51.0532	51.066	3.37191	4	62	0.0146385	6.20448	6.2302	5.76159	6.0491	6.28376	0.466917	0.588655	-1.62919	-0.268478	0.842098	-0.0792725	-0.0535505	-0.522163	-0.234656	-1.05649	-1.03782	-1.43611	-1.17663	-0.701051	-0.450935	-3.29775	-1.79477	0.485894	0.65361	0.00161667	0.0775653	0.313458	0.184682	2.79138	1.11033	0.609594	0.750792	0.00390844
CXCR2	513	0.199708	0.619974	0.819681	1.26284	0.243641	0.756359	0.576406	167.882	171.882	172.085	172.041	13.856	4	62	3.94194e-08	11.354	10.4896	8.90618	10.3648	9.8978	1.28583	0.320588	-1.4475	0.18129	-0.340206	1.45618	0.591767	-0.991624	0.467019	2.7438	1.50709	-1.98842	1.38225	5.24175	1.99337	-2.54485	1.45252	2.02973e-06	0.0506258	0.0134359	0.151401	5.69256	1.29563	1.87173	0.819872	8.03545e-06	0.0884946	0.0269944
GZMK	514	0.304615	0.200789	0.505403	0.879438	0.602716	0.397284	0.807903	107.097	111.097	111.3	111.255	41.7882	4	62	5.93476e-17	6.85953	7.56925	5.56438	5.94916	7.60521	0.16146	0.925285	-1.23242	-0.818312	0.96399	-0.745684	-0.0359641	-2.04083	-1.65605	-1.67677	-1.02524	-4.11483	-3.15154	-4.70135	-0.211183	-9.16441	-9.01742	1.48545e-05	0.833437	3.88716e-13	6.93797e-13	4.82814	0.0791272	12.4104	12.1588	4.909e-05	0.872828	7.21233e-12
CSF3	515	0.0339073	0.31482	0.348728	0.601836	0.0972315	0.902768	0.534419	121.279	125.279	125.482	125.438	14.8121	4	62	1.50766e-08	5.26998	5.16997	6.54809	6.30313	5.08376	-0.583741	-0.72789	1.25842	0.905349	-0.852139	0.186217	0.0862054	1.46433	1.21936	1.13778	1.06157	2.75935	2.32844	0.944688	0.411743	5.30103	5.34714	0.348485	0.681948	1.62419e-06	1.36496e-06	0.457815	0.166249	5.78936	5.86488	0.46505	0.770788	6.5736e-06
DPP4	516	0.0582602	0.0990923	0.157352	0.253404	0.370253	0.629747	0.666894	57.4679	61.4679	61.6713	61.6268	20.2437	4	62	1.04616e-10	6.41988	6.54722	5.72998	5.81675	6.7376	0.376156	0.658606	-1.15404	-0.961593	1.08087	-0.317725	-0.19038	-1.00762	-0.920857	-1.24636	-1.14106	-2.0106	-1.89324	-2.85595	-1.5975	-6.45425	-7.15032	0.00583067	0.115238	1.87458e-08	1.18074e-09	2.23428	0.938405	7.7271	8.92785	0.0126468	0.180902	1.10396e-07
IRAK4	517	0.011311	0.141698	0.15301	0.167105	0.0739236	0.926076	0.23871	70.8858	74.8858	75.0891	75.0446	2.70274	4	62	0.0384107	7.54335	7.45548	7.36275	7.63594	7.18921	0.616803	0.105498	-0.434051	1.15558	-1.44383	0.354136	0.266264	0.173539	0.446729	1.27822	1.20269	1.12782	1.36295	2.68119	1.90132	0.937764	2.92394	0.00938777	0.0619097	0.352005	0.00482071	2.02744	1.20824	0.453452	2.31689	0.0195764	0.105639	0.468375
SKI	518	0.0782647	0.548547	0.626812	1.17154	0.124862	0.875138	0.58674	156.691	160.691	160.894	160.849	17.4194	4	62	1.25867e-09	5.05692	5.35849	7.41293	6.50102	5.10556	-0.802034	-0.510643	1.47441	0.593301	-0.755038	-0.048639	0.252937	2.30738	1.39547	-1.03429	1.19163	4.94983	2.63074	-0.186709	0.91262	6.31916	4.6299	0.852498	0.364978	3.19197e-08	1.92067e-05	0.0693064	0.437734	7.49594	4.71655	0.887105	0.482253	1.78751e-07
PTPN6	519	0.0257061	0.106412	0.132118	0.170894	0.194569	0.805431	0.4587	57.2218	61.2218	61.4252	61.3807	8.0101	4	62	2.84727e-05	8.85472	8.69691	8.95067	9.16705	8.45711	0.110179	-0.480615	0.469356	1.27939	-1.37831	0.397611	0.239796	0.493555	0.709935	1.31732	1.18083	1.40791	1.63573	3.45817	1.95448	3.06116	5.33557	0.00098863	0.0551578	0.00325732	1.42588e-06	3.00497	1.25839	2.48714	5.84592	0.00247559	0.0956566	0.00749256
DAXX	520	0.0480451	0.195268	0.243313	0.439563	0.197462	0.802538	0.614018	94.9444	98.9444	99.1477	99.1032	17.965	4	62	7.6651e-10	5.80293	5.54783	6.78124	6.56739	5.46709	-0.382095	-0.8052	1.24055	0.88586	-0.939117	0.335834	0.0807396	1.31415	1.1003	1.26211	1.05756	2.48655	2.14399	2.15607	0.485719	6.01641	6.10408	0.0349658	0.628879	1.04432e-07	7.41769e-08	1.45636	0.201433	6.98117	7.12973	0.0637625	0.732028	5.23859e-07
IFNA1/13	521	0.00703043	0.231851	0.238881	0.258408	0.0294307	0.970569	0.175918	99.4616	103.462	103.665	103.62	2.46292	4	62	0.0542989	4.68881	4.77866	5.37395	4.91653	4.85445	-0.877296	-0.539972	1.69501	-0.0223319	-0.255408	-0.165641	-0.0757946	0.519498	0.0620803	-1.12166	-1.05394	1.43346	1.04397	-0.983727	-0.426558	2.20291	0.318811	0.329073	0.671179	0.0313266	0.750941	0.482708	0.173162	1.50409	0.124394	0.444148	0.76376	0.0578107
MX2	522	0.127875	1.34703	1.47491	6.15642	0.0867002	0.9133	0.804534	211.008	215.008	215.212	215.167	59.5038	4	62	1.5165e-20	12.3294	8.56648	11.9958	13.3755	7.85443	0.613621	-0.920528	0.477618	1.04012	-1.21083	4.47497	0.712053	4.14138	5.52108	22.2382	1.63813	17.6474	45.9209	10.9807	1.64627	7.25233	11.7113	3.5488e-16	0.104769	7.85765e-10	2.35087e-17	15.4499	0.979768	9.10471	16.6288	1.78358e-14	0.166248	6.17387e-09
BTLA	523	0.00715558	0.101089	0.108245	0.192903	0.0661056	0.933894	0.527955	49.6303	53.6303	53.8337	53.7892	15.0444	4	62	1.19888e-08	6.50863	6.80091	6.28779	6.25246	7.10453	-0.227827	0.581934	-0.839679	-0.937573	1.42315	-0.595897	-0.303624	-0.816737	-0.85207	-1.51141	-1.23424	-1.76142	-1.80509	-5.34402	-2.56989	-5.22816	-6.60629	1.38112e-06	0.0125907	2.13585e-06	1.02769e-08	5.85977	1.89995	5.67043	7.98814	5.70987e-06	0.0253957	8.39083e-06
MAPK3	524	0.0662892	0.120116	0.186405	0.197394	0.355619	0.644381	0.481053	69.0333	73.0333	73.2366	73.1921	2.86155	4	62	0.0305389	7.91775	7.96156	8.10726	7.70642	7.66127	0.253141	0.489615	1.27614	-0.8876	-1.1313	0.256475	0.300283	0.445991	0.045146	1.19456	1.23139	1.36225	1.03179	2.09426	2.28944	2.59524	0.318453	0.0403315	0.0254709	0.0117842	0.751211	1.39436	1.59396	1.9287	0.124238	0.0723477	0.0480701	0.0238943
CD9	525	0.120512	0.0944478	0.21496	0.291716	0.560627	0.439373	0.727147	59.2237	63.2237	63.4271	63.3826	16.3184	4	62	3.50853e-09	10.6059	10.6329	10.2641	9.77163	10.4829	0.716046	0.791943	-0.245989	-1.63182	0.369818	0.123032	0.150002	-0.218827	-0.71128	1.08902	1.10957	-1.16379	-1.63726	1.13123	1.28494	-1.43315	-5.64838	0.262317	0.203594	0.15684	4.33495e-07	0.581174	0.691235	0.804544	6.36302	0.369426	0.29684	0.236103
AICDA	526	0.00611187	0.131207	0.137319	0.14384	0.0445086	0.955491	0.169604	64.8673	68.8673	69.0707	69.0262	1.99099	4	62	0.106909	4.5777	4.78642	4.82456	4.55177	4.84727	-0.988487	0.486863	0.756408	-1.17172	0.916938	-0.26957	-0.0608449	-0.0227109	-0.295493	-1.20545	-1.04308	-1.01587	-1.2273	-2.1253	-0.453733	-0.127831	-2.01434	0.0375534	0.651605	0.898696	0.0483174	1.42535	0.186015	0.046387	1.3159	0.0679579	0.749909	0.923277
CD207	527	0.0110859	0.186484	0.19757	0.201461	0.0561115	0.943889	0.162334	87.1748	91.1748	91.3782	91.3337	1.48822	4	62	0.216639	4.82075	4.76636	5.22244	4.98874	4.85381	-0.600313	-0.898082	1.59853	0.319224	-0.419361	-0.033057	-0.0874543	0.368635	0.134927	-1.02318	-1.06249	1.29113	1.09804	-0.218417	-0.545879	1.73871	0.770779	0.827822	0.587108	0.0870489	0.443765	0.0820632	0.231282	1.06024	0.352847	0.869312	0.701704	0.141595
BID	528	0.0628595	0.22536	0.28822	0.690052	0.218096	0.781904	0.717183	104.427	108.427	108.63	108.585	32.8377	4	62	1.07404e-14	9.34719	8.72632	10.1332	10.249	8.39586	-0.0280574	-0.781116	0.925325	1.06578	-1.18193	0.951324	0.330456	1.73735	1.85315	1.93365	1.25741	3.33422	3.61288	5.68263	1.84848	7.39973	9.5649	3.80073e-07	0.069303	4.36044e-10	8.08635e-14	6.42013	1.15925	9.36047	13.0922	1.77099e-06	0.11607	3.61999e-09
CTSC	529	0.0701317	0.289778	0.35991	1.61016	0.194859	0.805141	0.843559	119.342	123.342	123.545	123.501	70.8629	4	62	1.97853e-22	7.40228	7.09016	9.70883	9.75479	7.01595	-0.561381	-0.782588	1.07329	1.10586	-0.835182	0.386338	0.0742115	2.69288	2.73884	1.30707	1.05279	6.46602	6.67535	2.03617	0.366536	10.121	12.4735	0.046011	0.715213	9.35449e-15	1.48453e-18	1.33714	0.145564	14.029	17.8284	0.081398	0.793536	2.82469e-13
ATG16L1	530	0.033665	0.427244	0.460909	0.628308	0.0730404	0.92696	0.389288	139.277	143.277	143.48	143.436	7.70647	4	62	4.16169e-05	5.20832	5.10269	6.57169	5.73326	5.03547	-0.500231	-0.664346	1.618	0.315354	-0.768781	0.172848	0.067218	1.53622	0.697788	1.12728	1.04769	2.90033	1.62202	0.753684	0.276457	4.78102	2.63037	0.453892	0.783117	1.11337e-05	0.0107444	0.343048	0.106174	4.95336	1.96882	0.57768	0.83976	3.75595e-05
KIR3DL3	531	0.0463172	0.993287	1.0396	2.11001	0.0445527	0.955447	0.571465	190.372	194.372	194.576	194.531	18.9427	4	62	3.21152e-10	5.05451	4.78306	8.09802	6.81201	4.9481	-0.605997	-0.791951	1.4789	0.597946	-0.678896	0.106416	-0.165037	3.14992	1.86392	1.07655	-1.1212	8.87607	3.63994	0.304926	-0.447297	6.44377	4.61797	0.761444	0.65622	1.95369e-08	2.00455e-05	0.118362	0.182951	7.70914	4.69798	0.82434	0.751918	1.1461e-07
CEACAM6	532	0	0.316915	0.316915	0.576013	0	1	0.483157	117.3	119.3	119.367	119.379	14.4898	4	62	2.07793e-08	5.18138	4.96174	6.34226	6.13282	4.90582	-0.475055	-0.797665	1.23008	0.922439	-0.879804	0.275559	0.0559214	1.43644	1.22699	1.21046	1.03952	2.70653	2.34079	1.4047	0.271437	5.22928	5.40955	0.165101	0.786956	2.12693e-06	1.07788e-06	0.78225	0.104049	5.67225	5.96743	0.247572	0.841462	8.36648e-06
PRKCA	533	0.0650057	0.132886	0.197892	0.211538	0.328492	0.671508	0.46303	74.6161	78.6161	78.8195	78.775	3.5199	4	62	0.0118384	5.94601	6.07614	5.7507	6.14709	6.32933	-0.478314	0.121066	-1.37796	0.447907	1.28731	-0.383318	-0.253192	-0.578633	-0.182234	-1.30434	-1.19184	-1.49343	-1.13464	-2.97671	-1.83667	-3.20247	-1.22255	0.00415146	0.0710534	0.00215145	0.226129	2.3818	1.14842	2.66727	0.645645	0.00935368	0.118744	0.00511302
CCL1	534	0.0113809	0.389303	0.400684	0.48966	0.0284037	0.971596	0.269286	131.544	135.544	135.748	135.703	4.82627	4	62	0.00187385	4.83779	4.77481	5.99524	5.06834	4.85584	-0.527722	-0.651441	1.7462	-0.0747725	-0.492266	-0.0180473	-0.0810216	1.1394	0.212509	-1.01259	-1.05777	2.2029	1.1587	-0.0827222	-0.351969	3.72905	0.842293	0.934339	0.726055	0.000418621	0.402861	0.0294956	0.139031	3.37818	0.394844	0.950698	0.801236	0.00112706
HFE	535	0	0.276141	0.276141	0.315463	0	1	0.1777	108.761	110.761	110.828	110.84	3.34958	4	62	0.0151157	4.9638	4.8903	5.68589	5.18426	4.84869	-0.437576	-0.650882	1.65789	0.202191	-0.771623	0.115111	0.0416067	0.837199	0.335572	1.08306	1.02926	1.78658	1.26188	0.628625	0.216352	3.26504	1.58493	0.531904	0.829424	0.00178433	0.11807	0.274167	0.0812236	2.74853	0.927862	0.653736	0.870104	0.00428349
KLRC2	536	0.113218	0.319024	0.432243	0.483936	0.261933	0.738067	0.432529	127.184	131.184	131.388	131.343	3.97154	4	62	0.00621673	5.53979	5.99803	5.03525	5.57709	5.89933	-0.185629	1.02761	-1.52144	-0.0868512	0.766308	-0.359546	0.0986949	-0.864082	-0.322238	-1.28302	1.0708	-1.82018	-1.25027	-1.80367	0.463104	-3.09011	-1.39665	0.0761417	0.644911	0.00299465	0.1675	1.11838	0.1905	2.52365	0.775986	0.126152	0.745339	0.00695066
MS4A2	537	0	0.203616	0.203616	0.230162	0	1	0.168953	89.8712	91.8712	91.9379	91.9506	3.15117	4	62	0.0201098	4.92694	4.95761	4.60011	4.45544	4.96626	0.613479	0.742654	-0.762968	-1.37224	0.779073	-0.0393194	-0.00864744	-0.36615	-0.510818	-1.02763	-1.00601	-1.28891	-1.42486	-0.250058	-0.0523654	-1.66294	-2.80964	0.803369	0.958406	0.101371	0.00662693	0.0950848	0.0184505	0.994085	2.17869	0.851421	0.966587	0.161523
CASP2	538	0.00593772	0.0718967	0.0778344	0.164928	0.0762865	0.923713	0.609004	28.9149	32.9149	33.1183	33.0738	21.1749	4	62	4.80046e-11	6.63203	6.57641	5.86242	6.05903	6.78882	0.620683	0.48165	-1.30323	-0.811736	1.01264	-0.15679	-0.212407	-0.926401	-0.729791	-1.1148	-1.15862	-1.90053	-1.6584	-1.66626	-2.1286	-7.02676	-6.7048	0.100706	0.0372685	1.93272e-09	6.95474e-09	0.996946	1.42866	8.71383	8.15772	0.160795	0.067482	1.37796e-08
OAS1	539	0.363852	2.90236	3.26621	11.6296	0.111399	0.888601	0.778877	259.513	263.513	263.716	263.672	50.1915	4	62	8.91116e-19	10.2978	5.43665	11.4796	12.2821	4.98957	0.407168	-1.00597	0.75074	0.984004	-1.13594	5.30821	0.447083	6.49008	7.29249	39.6215	1.36328	89.8895	156.769	8.8633	0.702208	7.73218	10.5249	1.27566e-12	0.485178	1.15417e-10	1.99142e-15	11.8943	0.314099	9.93773	14.7008	2.01954e-11	0.609192	1.11438e-09
CCL13	540	0	0.26038	0.26038	0.24741	0	1	0.0113606	105.117	107.117	107.184	107.197	0.178113	4	62	0.948876	4.82642	4.77965	4.96239	4.77132	4.84869	-0.14687	-0.756136	1.62439	-0.864607	0.143228	-0.0222701	-0.0690421	0.113705	-0.0773691	-1.01556	-1.04902	1.082	-1.05509	-0.125244	-0.36972	0.456668	-0.376317	0.900735	0.712851	0.649506	0.707966	0.0454028	0.147001	0.187417	0.149988	0.925063	0.793536	0.749243
CCL4	541	0.00507426	0.528632	0.533707	0.929677	0.00950759	0.990492	0.470199	149.548	153.548	153.751	153.707	13.3143	4	62	6.88357e-08	5.42229	5.75971	7.50859	6.65124	5.55841	-0.857394	-0.475608	1.50323	0.533144	-0.703371	-0.136125	0.201295	1.95018	1.09282	-1.09895	1.14973	3.86423	2.13291	-0.536579	0.754202	5.48958	3.72541	0.593479	0.453583	7.95341e-07	0.00042358	0.226595	0.343343	6.09945	3.37306	0.707369	0.577526	3.43569e-06
CD160	542	0	0.343152	0.343152	0.475952	0	1	0.322716	122.231	124.231	124.298	124.311	7.38553	4	62	6.24382e-05	4.88661	4.87832	6.13255	5.43584	4.8566	-0.631682	-0.646582	1.6082	0.355694	-0.685628	0.0300075	0.0217192	1.27594	0.579236	1.02102	1.01517	2.42157	1.49406	0.147003	0.101313	4.46389	2.45416	0.883607	0.919629	3.46692e-05	0.0169435	0.053741	0.0363873	4.46006	1.771	0.911728	0.940391	0.000109183
MAP3K9	543	0	0.224479	0.224479	0.224926	0	1	0.0624706	95.9191	97.9191	97.9858	97.9986	1.03282	4	62	0.397534	4.95326	4.87822	4.74992	5.18404	4.9374	0.0804247	-0.394964	-1.20768	1.54228	-0.0200626	0.0158632	-0.059183	-0.187481	0.246636	1.01106	-1.04188	-1.13877	1.18644	0.0960821	-0.341328	-0.810949	1.29199	0.923765	0.73401	0.420497	0.201156	0.0344384	0.134298	0.376237	0.696468	0.944307	0.806547	0.54326
AHR	544	0.0440073	0.231758	0.275766	1.11598	0.159582	0.840418	0.81824	104.414	108.414	108.617	108.573	61.6839	4	62	6.28277e-21	7.25223	7.79413	5.26424	5.74037	7.9283	0.374282	0.8187	-1.2561	-0.86562	0.928739	-0.67607	-0.134175	-2.66406	-2.18793	-1.59778	-1.09746	-6.33814	-4.55651	-3.98801	-0.742696	-11.2089	-11.1537	0.000178401	0.460471	1.50967e-16	1.85569e-16	3.7486	0.336798	15.8211	15.7315	0.000506895	0.584845	1.01884e-14
KLRC1	545	0.0580489	0.214473	0.272522	0.254031	0.213006	0.786994	0.268292	101.211	105.211	105.415	105.37	0.267685	4	62	0.897658	5.3738	5.36254	5.56677	5.4062	5.45113	-0.704178	-0.840197	1.62711	-0.312751	0.230018	-0.0773276	-0.0885865	0.115643	-0.0449274	-1.05506	-1.06333	1.08346	-1.03163	-0.473536	-0.50808	0.504961	-0.23773	0.637494	0.6132	0.615376	0.812874	0.195524	0.212398	0.210859	0.0899766	0.739262	0.720037	0.721766
IFI16	546	0.0203758	0.61649	0.636866	1.90207	0.0319939	0.968006	0.702788	160.218	164.218	164.421	164.376	35.2593	4	62	2.4107e-15	11.8714	9.62466	10.9589	12.173	9.54354	0.845893	-0.986634	0.101618	1.09192	-1.0528	2.32786	0.0811244	1.41536	2.62951	5.02061	1.05784	2.66726	6.18814	8.47613	0.27982	3.67964	8.27908	5.92817e-12	0.780547	0.000490941	1.29933e-11	11.2271	0.107601	3.30897	10.8863	7.9386e-11	0.83883	0.00129905
IL1RN	547	0.29221	2.2126	2.50481	6.93899	0.116659	0.883341	0.71792	242.875	246.875	247.078	247.033	35.8319	4	62	1.71058e-15	9.6821	6.21415	9.48916	11.6736	5.85869	0.442857	-0.955154	0.36508	1.24567	-1.09845	3.82341	0.355463	3.63047	5.81488	14.1566	1.2794	12.3846	56.2928	7.31016	0.639097	4.95252	9.60952	6.23696e-10	0.525114	5.94788e-06	6.79427e-14	9.20503	0.279746	5.22564	13.1679	5.08197e-09	0.648237	2.13017e-05
CD28	548	0.0317116	0.167591	0.199302	0.295565	0.159113	0.840887	0.503684	84.3006	88.3006	88.504	88.4595	11.138	4	62	7.15578e-07	6.37778	6.39862	6.04583	5.71814	6.78602	0.279277	0.330999	-0.544745	-1.3582	1.29267	-0.408236	-0.3874	-0.740186	-1.06788	-1.32706	-1.30803	-1.67039	-2.09635	-2.83188	-2.52178	-3.66236	-6.40185	0.0062328	0.0142594	0.000518935	2.30489e-08	2.20532	1.8459	3.28489	7.63735	0.0134621	0.0284818	0.00136609
CXCL1	549	0.0579128	0.36904	0.426953	1.2218	0.135642	0.864358	0.734162	132.48	136.48	136.684	136.639	37.3622	4	62	6.96332e-16	5.08929	4.88465	7.40598	6.85018	4.91875	-0.615084	-0.785069	1.30929	0.847608	-0.756744	0.170539	-0.0340998	2.48722	1.93142	1.12548	-1.02392	5.60697	3.81431	0.797819	-0.14986	8.3008	7.80928	0.428021	0.881362	1.19155e-11	8.48006e-11	0.368535	0.0548458	10.9239	10.0716	0.55067	0.910327	1.46799e-10
CASP8	550	0.0113425	0.118551	0.129893	0.330466	0.0873221	0.912678	0.679597	60.3524	64.3524	64.5558	64.5113	28.1448	4	62	2.4233e-13	9.77321	9.77816	8.55729	8.79	9.52561	0.852039	0.860688	-1.2694	-0.863382	0.420054	0.247594	0.252552	-0.968318	-0.735608	1.18723	1.19131	-1.95656	-1.6651	2.04788	1.96807	-5.71572	-5.25956	0.0448137	0.0535356	3.34653e-07	1.89842e-06	1.34859	1.27136	6.47541	5.72161	0.0795365	0.0931054	1.57604e-06
FASLG	551	0.0167822	0.326277	0.343059	0.330286	0.0489194	0.951081	0.102807	121.544	125.544	125.748	125.703	0.378549	4	62	0.823113	5.22615	5.33857	5.38575	5.36255	5.14514	-0.640253	0.458956	0.920263	0.693418	-1.43238	0.0810141	0.193434	0.240614	0.217414	1.05776	1.14348	1.1815	1.16265	0.404895	0.91397	0.858497	0.939495	0.686948	0.364274	0.393925	0.351123	0.163076	0.438572	0.404586	0.454541	0.774097	0.481529	0.51367
CD46	552	0.0163135	0.144471	0.160785	0.260375	0.101462	0.898538	0.506844	73.1417	77.1417	77.3451	77.3006	12.034	4	62	2.67408e-07	10.0809	9.97302	8.91733	9.76687	10.0534	0.663843	0.441854	-1.7306	0.0176132	0.607287	0.0274831	-0.0803917	-1.13609	-0.286551	1.01923	-1.05731	-2.19784	-1.21972	0.205773	-0.566546	-6.0698	-1.85454	0.837642	0.573068	8.48034e-08	0.0684189	0.0769413	0.241794	7.07159	1.16482	0.875842	0.690551	4.37511e-07
ITGAM	553	0.0609801	0.526886	0.587866	1.78528	0.103731	0.896269	0.737884	153.447	157.447	157.65	157.606	39.7482	4	62	1.80234e-16	9.4569	8.3854	10.6117	10.8705	7.71654	0.0355666	-0.747105	0.879084	1.06813	-1.23567	1.74036	0.668861	2.89516	3.15396	3.34118	1.58982	7.43925	8.90097	6.82258	2.46765	8.09866	10.6875	4.35654e-09	0.0163744	2.66867e-11	1.07357e-15	8.36086	1.78583	10.5737	14.9692	2.91066e-08	0.0322051	2.91472e-10
GPR183	554	0.0153213	0.164844	0.180165	0.974961	0.0850402	0.91496	0.848863	80.7035	84.7035	84.9069	84.8624	80.8504	4	62	6.79828e-24	8.49472	9.00649	7.03146	6.95725	9.39684	0.2817	0.735952	-1.01711	-1.08298	1.08244	-0.902124	-0.390355	-2.36538	-2.4396	-1.86882	-1.31072	-5.1529	-5.4249	-6.32845	-2.58044	-11.8422	-14.7943	3.07744e-08	0.0122493	1.45553e-17	5.20854e-22	7.51181	1.91189	16.837	21.2833	1.73282e-07	0.0247396	1.68131e-15
GNGT1	555	0	0.234353	0.234353	0.229706	0	1	0.0415995	98.5881	100.588	100.655	100.668	0.67278	4	62	0.613359	4.81263	4.85901	4.64777	5.02142	4.90582	-0.268273	0.0707324	-1.47321	1.25784	0.41291	-0.0931954	-0.0468147	-0.258048	0.115599	-1.06673	-1.03298	-1.19586	1.08342	-0.552457	-0.264247	-1.09242	0.592664	0.582622	0.792466	0.278875	0.555562	0.234613	0.101019	0.55459	0.255268	0.698551	0.845298	0.388307
NUP107	556	0.021002	0.0812343	0.102236	0.108295	0.205426	0.794574	0.349112	40.8005	44.8005	45.0039	44.9594	2.3208	4	62	0.0666379	6.39271	6.38297	6.09724	6.40936	6.52523	0.196994	0.135536	-1.66828	0.302124	1.03363	-0.132527	-0.142262	-0.427997	-0.115874	-1.09621	-1.10363	-1.34536	-1.08363	-1.3189	-1.32631	-3.03727	-0.996448	0.192054	0.189603	0.00349011	0.322905	0.716576	0.722156	2.45716	0.490925	0.282082	0.279281	0.00795673
IFITM1	557	0.00519617	0.908156	0.913352	2.39567	0.00568913	0.994311	0.645676	182.89	186.89	187.094	187.049	27.9294	4	62	2.81768e-13	13.2853	11.1809	12.8726	14.1121	10.9694	0.587686	-0.955806	0.284976	1.19405	-1.1109	2.31589	0.211462	1.90317	3.14262	4.97913	1.15786	3.74035	8.83126	6.96836	0.605197	4.08946	8.17786	2.43908e-09	0.547257	0.000126742	1.94545e-11	8.61277	0.261809	3.89708	10.711	1.70735e-08	0.668605	0.000367575
CD3G	558	0.0552945	0.198157	0.253452	0.85057	0.218166	0.781834	0.798254	96.4528	100.453	100.656	100.612	53.1551	4	62	2.29822e-19	8.03921	8.49669	6.55841	6.62553	8.67181	0.354319	0.803473	-1.09955	-1.03365	0.975415	-0.632601	-0.175127	-2.11341	-2.04628	-1.55036	-1.12906	-4.32711	-4.13041	-4.02981	-1.04468	-9.59939	-11.2634	0.000155041	0.300225	7.06802e-14	1.23216e-16	3.80955	0.522553	13.1507	15.9093	0.000443798	0.413178	1.66179e-12
C8A	559	0	0.201787	0.201787	0.196646	0	1	0.0360486	89.3116	91.3116	91.3783	91.3911	0.579649	4	62	0.678475	4.97718	4.84215	4.68347	4.93573	4.90582	0.944021	-0.232884	-1.61594	0.582767	0.322037	0.0713608	-0.0636666	-0.222346	0.0299138	1.05071	-1.04512	-1.16663	1.02095	0.455883	-0.387283	-1.0144	0.165278	0.650067	0.699873	0.314336	0.869263	0.187042	0.154981	0.502606	0.0608489	0.749609	0.784143	0.428387
CCR2	560	0	0.301599	0.301599	0.394597	0	1	0.282	114.229	116.229	116.295	116.308	6.08773	4	62	0.000337686	7.65643	7.17942	6.90353	6.88021	6.86857	1.65436	0.242129	-0.574649	-0.643694	-0.67815	0.787862	0.310846	0.03496	0.0116385	1.72651	1.24044	1.02453	1.0081	4.11694	1.54666	0.130461	0.0525983	0.000115447	0.127036	0.896624	0.958221	3.93762	0.896074	0.0473897	0.0185343	0.00033672	0.196382	0.921998
TNFRSF4	561	0.0542705	0.489649	0.543919	1.08323	0.0997768	0.900223	0.598017	148.758	152.758	152.961	152.916	19.4113	4	62	2.13447e-10	4.97361	4.82326	6.88513	6.47447	4.87194	-0.636718	-0.788171	1.28885	0.87517	-0.739132	0.101668	-0.0486811	2.01319	1.60253	1.07301	-1.03432	4.03674	3.03675	0.413512	-0.186387	5.84298	5.63411	0.680658	0.85275	2.04779e-07	4.57876e-07	0.167071	0.0691783	6.68871	6.33925	0.769896	0.887105	9.87043e-07
CD163	562	0.122017	0.47512	0.597137	1.37087	0.204337	0.795663	0.699211	150.275	154.275	154.479	154.434	26.6379	4	62	7.0671e-13	9.52904	8.37122	10.0622	10.1769	7.8518	0.31867	-0.796668	0.832237	0.942794	-1.29703	1.67723	0.519419	2.21036	2.32512	3.19814	1.43338	4.6279	5.01109	6.90205	2.00247	6.48613	8.26789	3.17601e-09	0.0496129	1.65286e-08	1.35859e-11	8.49812	1.3044	7.78176	10.8669	2.16898e-08	0.0869214	9.84681e-08
EIF2AK2	563	0.0693919	0.733738	0.80313	3.08161	0.0864019	0.913598	0.78727	173.331	177.331	177.535	177.49	53.4912	4	62	1.97806e-19	10.4535	7.77564	9.90434	10.8922	7.08713	0.728435	-0.856281	0.403474	0.988105	-1.26373	3.36632	0.688505	2.81721	3.8051	10.3125	1.61161	7.04797	13.9782	11.1923	2.1569	6.68463	10.9364	1.60603e-16	0.0348984	7.53394e-09	4.19237e-16	15.7942	1.45719	8.12298	15.3775	1.01884e-14	0.0636772	4.83428e-08
CD53	564	0.0493119	0.247248	0.29656	0.503945	0.16628	0.83372	0.571201	108.635	112.635	112.839	112.794	16.0162	4	62	4.67571e-09	11.4585	10.8049	11.634	11.9061	10.5555	0.327604	-0.819176	0.635474	1.11284	-1.25674	0.903006	0.249391	1.07848	1.35055	1.86996	1.18871	2.11181	2.5501	5.15612	1.33588	4.39217	6.66429	2.79654e-06	0.18647	4.46164e-05	8.16684e-09	5.55338	0.729391	4.35051	8.08795	1.06338e-05	0.275193	0.000138248
IL27	565	0.0761692	0.733219	0.809388	1.38665	0.0941071	0.905893	0.52887	173.58	177.58	177.783	177.739	14.1305	4	62	2.98238e-08	5.25808	4.79987	7.15776	6.55077	4.93505	-0.45815	-0.893487	1.34669	0.770004	-0.765053	0.323029	-0.135183	2.2227	1.61572	1.25095	-1.09823	4.66767	3.06464	1.07397	-0.423241	5.27345	4.64345	0.287	0.673584	1.80182e-06	1.82956e-05	0.542118	0.171608	5.74429	4.73765	0.39836	0.765832	7.19791e-06
ELK1	566	0.0508365	0.926602	0.977438	1.82074	0.05201	0.94799	0.538524	186.394	190.394	190.598	190.553	16.117	4	62	4.24713e-09	5.39003	5.03343	7.99164	6.87514	5.12689	-0.533135	-0.807309	1.46717	0.608725	-0.735451	0.263133	-0.0934592	2.86475	1.74825	1.20008	-1.06693	7.28409	3.3595	0.780194	-0.261892	6.0637	4.48175	0.438245	0.794273	8.68473e-08	3.25491e-05	0.358283	0.10003	7.06124	4.48746	0.561265	0.846199	4.46266e-07
SMAD3	567	0.0293745	0.164715	0.19409	0.381923	0.151345	0.848655	0.621847	82.9801	86.9801	87.1834	87.1389	19.3218	4	62	2.30663e-10	6.92527	6.831	7.90573	7.94843	7.28039	-0.856814	-1.03515	0.998074	1.07887	-0.184979	-0.35512	-0.449386	0.62534	0.668048	-1.27909	-1.36546	1.54257	1.58892	-2.48542	-2.9524	3.1219	4.04075	0.0156509	0.00444829	0.00272911	0.000149428	1.80546	2.35181	2.56398	3.82557	0.03096	0.00998596	0.00636793
HAVCR2	568	0	0.357009	0.357009	0.752886	0	1	0.554551	124.686	126.686	126.752	126.765	19.2963	4	62	2.35831e-10	5.03386	4.86296	6.38193	6.39579	4.84869	-0.580876	-0.791751	1.08244	1.09954	-0.809352	0.185173	0.0142657	1.53324	1.5471	1.13695	1.00994	2.89435	2.92229	0.889361	0.0652403	5.2589	6.42642	0.377247	0.948193	1.90313e-06	2.09208e-08	0.423374	0.0231034	5.72053	7.67942	0.49676	0.961618	7.56341e-06
OXER1	569	0.00369052	0.400462	0.404152	0.582541	0.00913151	0.990868	0.359295	132.312	136.312	136.515	136.471	8.36296	4	62	1.84105e-05	4.76584	4.77866	6.24929	5.41698	4.8512	-0.698469	-0.678412	1.62183	0.319994	-0.564945	-0.0853672	-0.0725437	1.39809	0.565773	-1.06096	-1.05157	2.63552	1.48018	-0.386639	-0.31232	4.52186	2.21608	0.700347	0.755846	2.82378e-05	0.0303656	0.154686	0.121567	4.54917	1.51762	0.784389	0.819431	9.0314e-05
TNFSF13	570	0.0841729	0.4245	0.508673	0.618347	0.165475	0.834525	0.399903	142.123	146.123	146.326	146.281	6.32618	4	62	0.000246222	8.08754	7.63975	7.28319	8.3149	7.23876	0.782357	-0.152576	-0.897042	1.25707	-0.989811	0.848776	0.400992	0.0444316	1.07614	1.80097	1.32042	1.03128	2.10839	3.69881	1.63936	0.138102	4.05274	0.000461557	0.106203	0.890608	0.000143504	3.33577	0.973864	0.0503136	3.84314	0.00122763	0.168264	0.916553
CD22	571	0.0370001	0.357249	0.394249	0.594311	0.0938496	0.90615	0.464364	128.991	132.991	133.195	133.15	10.381	4	62	1.68298e-06	5.69608	6.19101	7.24033	6.57046	6.61714	-1.3444	-0.476794	1.36264	0.188359	0.270196	-0.921058	-0.426127	0.623192	-0.0466842	-1.8935	-1.34362	1.54028	-1.03289	-4.38705	-1.91139	2.11823	-0.192213	4.5424e-05	0.0605796	0.0381708	0.848204	4.34271	1.21767	1.41827	0.0714998	0.000140609	0.103486	0.0688325
RARRES3	572	0.0736124	0.55384	0.627453	1.64495	0.117319	0.882681	0.702201	157.025	161.025	161.228	161.184	29.6031	4	62	8.89669e-14	9.04597	7.38033	9.81318	9.81406	7.56949	0.271201	-1.13445	0.918659	0.919397	-0.97481	1.47648	-0.189165	2.24369	2.24456	2.78268	-1.1401	4.73606	4.73893	5.64222	-0.679741	6.11746	7.41377	4.43862e-07	0.499198	7.03992e-08	4.12234e-10	6.35275	0.301727	7.15243	9.38486	2.03134e-06	0.622734	3.70649e-07
GZMM	573	0.0822354	0.487566	0.569802	0.972071	0.144323	0.855677	0.559492	150.035	154.035	154.239	154.194	15.1002	4	62	1.13486e-08	4.63407	4.78706	6.74364	5.90381	4.87738	-0.832108	-0.66352	1.49254	0.567085	-0.563993	-0.243309	-0.0903193	1.86626	1.02643	-1.1837	-1.06461	3.64586	2.03698	-0.98999	-0.345083	5.4168	3.60946	0.326027	0.7312	1.04866e-06	0.000614418	0.486747	0.135964	5.97937	3.21154	0.441003	0.804033	4.45745e-06
CX3CL1	574	0.113049	0.800086	0.913135	1.58562	0.123804	0.876196	0.554513	180.056	184.056	184.259	184.215	15.2897	4	62	9.42761e-09	4.69149	4.771	7.28367	6.33666	4.88125	-0.775277	-0.706884	1.4544	0.639821	-0.612058	-0.189756	-0.110243	2.40243	1.45541	-1.14057	-1.07941	5.28692	2.74235	-0.60316	-0.32939	5.44817	3.9985	0.548602	0.742971	9.30987e-07	0.000172242	0.260742	0.129028	6.03106	3.76386	0.669451	0.813617	3.97703e-06
C7	575	0.0204216	0.170502	0.190923	0.238114	0.106962	0.893038	0.364691	83.6129	87.6129	87.8162	87.7717	6.02224	4	62	0.000368457	4.56785	4.78543	5.48435	4.95579	4.86057	-1.0647	-0.426428	1.62381	0.0733141	-0.206	-0.292725	-0.0751427	0.623772	0.0952165	-1.22495	-1.05347	1.5409	1.06823	-2.01698	-0.487166	3.06681	0.567095	0.0480334	0.627859	0.00320442	0.572697	1.31846	0.202138	2.49425	0.242075	0.0847074	0.73167	0.00738744
CD4	576	0.0222247	0.372565	0.39479	0.396664	0.0562951	0.943705	0.150108	130.091	134.091	134.294	134.25	1.28304	4	62	0.28636	5.458	5.71427	5.88527	5.3703	5.73428	-0.82194	0.385683	1.19148	-1.23518	0.479965	-0.276277	-0.0200075	0.150989	-0.363971	-1.21107	-1.01396	1.11033	-1.28696	-1.29146	-0.0883515	0.503838	-1.47099	0.201338	0.929882	0.616161	0.14635	0.696073	0.0315721	0.210306	0.834607	0.294176	0.948357	0.721798
IL3	577	0	0.159179	0.159179	0.156719	0	1	0.0458576	74.6065	76.6065	76.6731	76.6859	0.744955	4	62	0.565078	4.6588	4.77965	4.8838	4.6824	4.84869	-1.12898	0.0906379	1.14174	-0.890828	0.787424	-0.18989	-0.0690421	0.0351084	-0.166292	-1.14068	-1.04902	1.02463	-1.12217	-1.36583	-0.472862	0.18034	-1.03447	0.176926	0.637972	0.857474	0.304934	0.752209	0.195198	0.0667792	0.515795	0.262998	0.739539	0.890731
PTAFR	578	0.0190081	0.2451	0.264108	0.296202	0.0719709	0.928029	0.256503	104.781	108.781	108.984	108.94	3.44084	4	62	0.0132592	9.07725	8.98661	9.2444	9.30526	8.62798	0.108311	-0.230804	0.733642	0.961314	-1.57246	0.449272	0.358627	0.616424	0.677281	1.36535	1.2822	1.53307	1.59912	2.5866	1.94769	2.53306	3.37101	0.0120538	0.0559841	0.0138511	0.00129358	1.91888	1.25194	1.85852	2.88821	0.0243927	0.0967105	0.0277563
IL20	579	0	0.204943	0.204943	0.203313	0	1	0.053073	90.274	92.274	92.3407	92.3535	0.868738	4	62	0.487843	4.64724	4.77965	4.89175	4.60089	4.84869	-0.844916	0.20649	1.09665	-1.21294	0.754716	-0.201453	-0.0690421	0.0430627	-0.247802	-1.14986	-1.04902	1.0303	-1.1874	-1.27702	-0.416735	0.194944	-1.35856	0.206358	0.678311	0.846074	0.17921	0.685379	0.168571	0.0725914	0.746638	0.300086	0.768481	0.882462
CSF1R	580	0.184579	0.365044	0.549623	1.33956	0.335829	0.664171	0.767209	137.454	141.454	141.657	141.613	40.6733	4	62	1.08374e-16	7.94612	8.21883	5.73643	5.9337	7.93815	0.653086	0.878108	-1.17024	-1.00746	0.646505	0.00797522	0.28068	-2.20172	-2.00445	1.00554	1.21477	-4.60026	-4.01234	0.0373636	1.2282	-7.35127	-8.11249	0.970315	0.224015	5.29215e-10	2.52534e-11	0.0130872	0.649723	9.27637	10.5977	0.976338	0.322715	4.35824e-09
TBXA2R	581	0.0643513	0.424435	0.488787	0.977734	0.131655	0.868345	0.617547	141.018	145.018	145.221	145.177	20.488	4	62	8.51192e-11	4.63415	4.82168	6.71701	6.21191	4.86546	-0.86147	-0.66347	1.33775	0.80443	-0.617243	-0.231305	-0.043781	1.85156	1.34645	-1.1739	-1.03081	3.60889	2.54286	-1.00915	-0.179473	5.76298	5.07719	0.316823	0.858152	2.78944e-07	3.75158e-06	0.499183	0.0664359	6.55448	5.42579	0.431472	0.891135	1.33441e-06
IL2RA	582	0.216387	0.88778	1.10417	3.85652	0.195973	0.804027	0.799931	188.79	192.79	192.994	192.949	52.5363	4	62	3.0351e-19	4.64274	4.95869	9.0688	8.38778	4.79279	-0.796425	-0.650754	1.2442	0.930221	-0.727243	-0.150054	0.165902	4.27601	3.59499	-1.10961	1.12187	19.3734	12.0837	-0.451819	0.46811	9.18149	9.35378	0.652976	0.641347	3.63443e-13	1.84719e-13	0.185103	0.192907	12.4396	12.7335	0.750435	0.741776	6.92461e-12
IL13RA1	583	0.118918	0.477095	0.596012	0.761491	0.199522	0.800478	0.455819	150.392	154.392	154.595	154.551	8.29783	4	62	1.99454e-05	8.84929	8.01613	8.2308	8.44009	7.50027	1.28182	-0.381731	0.0468878	0.464768	-1.41174	1.34902	0.515861	0.730527	0.939814	2.54739	1.42985	1.65924	1.91828	5.54049	1.98515	2.13952	3.33535	6.55064e-07	0.0515556	0.0363374	0.00144237	6.18372	1.28772	1.43965	2.84092	2.86998e-06	0.0899158	0.066029
PTPN2	584	0.0284747	0.492286	0.520761	1.43912	0.054679	0.945321	0.690225	147.298	151.298	151.501	151.456	32.4213	4	62	1.39892e-14	9.37021	8.15523	9.78059	10.7883	8.07322	0.119393	-0.94171	0.477802	1.35786	-1.01334	1.29699	0.0820184	1.70738	2.71505	2.45716	1.0585	3.26567	6.56616	5.27494	0.31517	4.95704	9.54703	1.7918e-06	0.753691	5.84966e-06	8.6707e-14	5.74671	0.122807	5.23287	13.0619	7.18586e-06	0.81824	2.09743e-05
LTB	585	0.00327429	0.33637	0.339644	0.472668	0.00964036	0.99036	0.337014	121.526	125.526	125.729	125.685	7.49571	4	62	5.42927e-05	7.08253	6.95745	5.78098	6.43925	6.98062	0.796191	0.566912	-1.58956	-0.382938	0.609391	0.101909	-0.0231744	-1.19964	-0.541365	1.07319	-1.01619	-2.29682	-1.45535	0.503581	-0.108846	-4.23326	-2.31353	0.61634	0.913676	7.75158e-05	0.0240236	0.210179	0.0392078	4.11061	1.61936	0.721798	0.935235	0.000231346
CCR5	586	0.133113	0.281467	0.41458	0.726386	0.321079	0.678921	0.668545	120.961	124.961	125.164	125.12	18.323	4	62	5.55889e-10	6.50731	6.15981	7.27648	7.49789	5.91378	-0.236855	-0.739489	0.875722	1.19598	-1.09536	0.593524	0.246029	1.3627	1.58411	1.50893	1.18594	2.57167	2.99823	3.16723	1.22655	5.18273	7.3028	0.00238838	0.224628	2.5319e-06	6.42298e-10	2.6219	0.648536	5.59655	9.19226	0.00563262	0.323308	9.66326e-06
EOMES	587	0.10601	0.182765	0.288775	0.613165	0.367101	0.632899	0.746034	95.3431	99.3431	99.5465	99.502	32.9956	4	62	9.72159e-15	5.58058	6.33929	4.75863	5.03631	6.48113	-0.0766009	0.915089	-1.15097	-0.788008	1.10048	-0.900544	-0.141839	-1.7225	-1.44481	-1.86677	-1.10331	-3.30008	-2.72228	-5.96063	-0.876439	-8.12451	-8.26101	1.2975e-07	0.384175	2.40697e-11	1.39634e-11	6.88689	0.415471	10.6185	10.855	6.3941e-07	0.504062	2.68604e-10
NFKBIA	588	0.0338835	0.761874	0.795758	2.69081	0.0425802	0.95742	0.741971	173.838	177.838	178.042	177.997	42.606	4	62	3.84363e-17	9.82516	8.9068	11.5621	12.5409	8.64895	-0.278068	-0.819521	0.746022	1.32311	-0.971543	1.1762	0.257845	2.91317	3.89196	2.25981	1.19569	7.53269	14.8456	3.8489	0.798243	6.8058	11.0119	0.000283117	0.427777	4.65702e-09	3.15563e-16	3.54803	0.368783	8.33189	15.5009	0.000779268	0.550586	3.0913e-08
TGFB1	589	0.0136467	0.0689612	0.0826079	0.115277	0.165199	0.834801	0.477047	29.437	33.437	33.6404	33.5959	9.135	4	62	7.22598e-06	9.42389	9.53974	8.83118	9.2904	9.51277	0.35983	0.759493	-1.68505	-0.100727	0.666452	-0.0888763	0.0269684	-0.681596	-0.222371	-1.06354	1.01887	-1.60391	-1.16665	-0.960939	0.273552	-5.25624	-2.07778	0.340316	0.785338	1.9222e-06	0.0418768	0.468118	0.104943	5.7162	1.37803	0.456521	0.841044	7.62935e-06
TP53	590	0.1155	0.450489	0.56599	0.597412	0.204068	0.795932	0.345537	146.967	150.967	151.17	151.126	2.89715	4	62	0.0290085	5.88946	6.02274	6.89206	6.31897	6.21583	-0.978368	-0.633704	1.6142	0.132283	-0.134414	-0.326377	-0.193087	0.676232	0.103138	-1.25386	-1.14321	1.59796	1.07411	-1.37932	-0.76448	2.03789	0.376643	0.172751	0.447481	0.045833	0.707725	0.76258	0.349225	1.33882	0.150135	0.257288	0.571647	0.0811763
CDC42	591	0.0349838	0.112149	0.147133	0.144813	0.237771	0.762229	0.331259	61.7096	65.7096	65.9129	65.8684	1.59652	4	62	0.186482	11.7163	11.6205	11.3427	11.6434	11.5449	0.999689	0.328723	-1.61657	0.488849	-0.200687	0.171405	0.0755961	-0.202179	0.0984609	1.12615	1.0538	-1.15043	1.07063	1.45084	0.598877	-1.2201	0.720096	0.151864	0.551437	0.227046	0.474172	0.818545	0.258504	0.643886	0.324064	0.229196	0.671845	0.326167
PLAUR	592	0.0527328	0.78338	0.836113	2.82519	0.063069	0.936931	0.749889	176.456	180.456	180.66	180.615	42.947	4	62	3.21247e-17	5.90031	5.24929	8.64327	8.54218	4.90057	-0.412078	-0.771296	1.10143	1.04565	-0.963714	0.999737	0.348721	3.7427	3.6416	1.99964	1.27343	13.3864	12.4805	3.22133	1.06079	8.60826	10.1446	0.00203392	0.292902	3.50619e-12	8.54433e-15	2.69167	0.533278	11.4552	14.0683	0.00484867	0.404727	4.90866e-11
CD82	593	0.0957653	0.334148	0.429913	1.4612	0.222755	0.777245	0.802106	128.979	132.979	133.183	133.138	53.7027	4	62	1.80047e-19	7.68039	7.51963	9.73823	9.96777	7.26268	-0.576546	-0.699577	0.998339	1.17401	-0.896222	0.417708	0.256949	2.47555	2.70508	1.3358	1.19495	5.56178	6.52096	2.04891	1.1801	8.658	11.465	0.0447099	0.24247	2.87789e-12	5.82778e-17	1.3496	0.615342	11.5409	16.2345	0.0794155	0.345744	4.10365e-11
ITGA5	594	0.0214881	0.332421	0.353909	0.365697	0.0607164	0.939284	0.179189	123.21	127.21	127.414	127.369	1.57604	4	62	0.191866	9.30808	9.357	8.81793	9.17626	8.99018	0.792314	1.00982	-1.38712	0.206177	-0.621194	0.317898	0.366815	-0.172257	0.186075	1.24651	1.2895	-1.12682	1.13766	1.5727	1.71358	-0.608311	0.795877	0.120877	0.0916021	0.545203	0.42914	0.917656	1.03809	0.263442	0.367401	0.188507	0.14818	0.66636
CD97	595	0.090201	0.616302	0.706503	1.18088	0.127673	0.872327	0.53971	164.007	168.007	168.211	168.166	14.7572	4	62	1.59197e-08	9.01657	8.12898	9.99762	9.77808	7.9563	0.0442408	-0.912054	1.10122	0.864692	-1.0981	1.06027	0.172679	2.04132	1.82178	2.08533	1.12715	4.11621	3.53517	3.83939	0.587648	5.27359	5.70175	0.000292107	0.558903	1.80089e-06	3.5314e-07	3.53446	0.252663	5.74451	6.45205	0.000803294	0.678259	7.19791e-06
FCGR2B	596	0.13848	0.377303	0.515784	1.05171	0.268485	0.731515	0.691424	137.762	141.762	141.965	141.921	28.4059	4	62	2.02044e-13	12.262	11.083	12.2755	12.7858	10.5986	0.502382	-0.782376	0.517052	1.07312	-1.31018	1.66341	0.48437	1.67687	2.18718	3.16764	1.39898	3.19733	4.55415	7.67224	2.08938	5.51351	8.71587	1.46672e-10	0.0407836	7.26076e-07	2.28749e-12	9.83365	1.38951	6.13902	11.6406	1.36894e-09	0.0730848	3.15418e-06
PMCH	597	0	0.078719	0.078719	0.113001	0	1	0.345597	30.9494	32.9494	33.0161	33.0289	8.1857	4	62	2.29033e-05	4.6588	4.78328	4.49324	4.26962	4.84869	0.205523	0.737667	-0.502255	-1.45823	1.0173	-0.18989	-0.0654114	-0.355452	-0.579073	-1.14068	-1.04638	-1.27939	-1.49389	-1.94223	-0.637055	-2.59636	-5.12252	0.0566552	0.526434	0.0117497	3.16965e-06	1.24676	0.278656	1.92997	5.49899	0.0975394	0.649346	0.02384
MBL2	598	0	0.294126	0.294126	0.438598	0	1	0.370037	112.673	114.673	114.74	114.753	9.10464	4	62	7.49313e-06	4.76568	4.79291	6.21436	5.01723	4.90442	-0.612482	-0.567803	1.7648	-0.199699	-0.384813	-0.138738	-0.111511	1.30994	0.112806	-1.10094	-1.08036	2.47931	1.08133	-0.73412	-0.561843	4.95003	0.516243	0.465643	0.576248	6.00247e-06	0.607521	0.331947	0.23939	5.22167	0.216439	0.590863	0.692758	2.14225e-05
CCR6	599	0.0535779	0.351695	0.405273	0.582332	0.132202	0.867798	0.467989	129.38	133.38	133.584	133.539	10.0942	4	62	2.34056e-06	4.86892	5.32952	6.54718	5.67993	5.40736	-1.1234	-0.381722	1.57899	0.182518	-0.256387	-0.538439	-0.0778367	1.13982	0.272572	-1.4524	-1.05543	2.20354	1.20796	-2.58062	-0.35051	3.89726	1.12909	0.0122435	0.727144	0.000241348	0.263211	1.91209	0.138379	3.61736	0.579696	0.0247396	0.801604	0.000673938
FOS	600	0.0769052	0.665523	0.742428	1.61468	0.103586	0.896414	0.63392	167.924	171.924	172.127	172.083	22.0062	4	62	2.43301e-11	12.1734	11.5227	9.08893	10.1807	11.014	1.14733	0.605316	-1.42183	-0.51247	0.181649	1.15939	0.50865	-1.92512	-0.833351	2.23363	1.42272	-3.79767	-1.78182	4.04407	1.66975	-4.79157	-2.51261	0.000147766	0.100012	1.07152e-05	0.0145993	3.83043	0.999949	4.97	1.83567	0.000424551	0.160185	3.62668e-05
CSF2RB	601	0.117608	0.548753	0.666361	1.5341	0.176494	0.823506	0.688011	158.38	162.38	162.583	162.539	29.3617	4	62	1.04787e-13	7.89925	6.55759	8.74479	8.65647	6.15184	0.249022	-0.8749	0.957331	0.88335	-1.2148	1.74742	0.405754	2.59295	2.50464	3.35757	1.32478	6.03331	5.67506	6.69555	1.45793	7.08586	8.29337	7.21464e-09	0.149908	1.52699e-09	1.22735e-11	8.14179	0.824175	8.81616	10.911	4.63906e-08	0.226776	1.11515e-08
CDKN1A	602	0.0455476	0.231546	0.277094	0.598788	0.164376	0.835624	0.661904	104.508	108.508	108.711	108.667	24.3156	4	62	3.9644e-12	7.43425	6.80195	8.35998	8.20454	6.81704	-0.120657	-0.974958	1.1301	0.920087	-0.954574	0.617212	-0.0150868	1.54294	1.38751	1.53391	-1.01051	2.91388	2.61626	3.64198	-0.0835197	6.49374	7.07539	0.000553901	0.933707	1.60395e-08	1.59206e-09	3.25657	0.0297892	7.79481	8.79804	0.00144455	0.950647	9.61121e-08
KNG1	603	0.00422296	0.0742741	0.078497	0.112987	0.0537977	0.946202	0.404444	29.9989	33.9989	34.2023	34.1578	8.89166	4	62	9.67675e-06	4.57064	4.79207	4.49274	4.27018	4.84464	-0.100355	0.848771	-0.434286	-1.38824	1.07411	-0.274001	-0.0525709	-0.351907	-0.574464	-1.20916	-1.03711	-1.27625	-1.48912	-2.86913	-0.52016	-2.63053	-5.20084	0.00562084	0.604805	0.01074	2.36604e-06	2.2502	0.218385	1.969	5.62598	0.0122434	0.712896	0.021974
CSF2	604	0	0.225156	0.225156	0.240373	0	1	0.120078	96.1057	98.1057	98.1723	98.1851	2.11519	4	62	0.089524	4.6588	4.77965	5.28084	4.71286	4.84869	-0.796262	-0.308713	1.71332	-0.578177	-0.0301684	-0.18989	-0.0690421	0.432154	-0.135833	-1.14068	-1.04902	1.34925	-1.09873	-1.14842	-0.39759	1.86647	-0.710486	0.255208	0.692298	0.0667061	0.480067	0.593105	0.159707	1.17583	0.318698	0.361067	0.778772	0.11227
CCRL1	605	0.00360793	0.0838938	0.0875017	0.104123	0.0412326	0.958767	0.265184	36.9907	40.9907	41.1941	41.1496	4.44039	4	62	0.00320881	4.57317	4.78706	4.49346	4.45932	4.84728	-0.33603	0.884442	-0.7908	-0.985627	1.22801	-0.274112	-0.060214	-0.353814	-0.387959	-1.20925	-1.04262	-1.27793	-1.30854	-2.70338	-0.561912	-2.49127	-3.30834	0.00884583	0.576202	0.0154192	0.00156568	2.05326	0.239425	1.81194	2.8053	0.018572	0.692758	0.0305692
IL28A	606	0.0699355	0.54612	0.616055	0.989265	0.113522	0.886478	0.51118	156.021	160.021	160.224	160.18	12.6405	4	62	1.3961e-07	4.55845	4.77691	6.64179	5.81202	4.88343	-0.888218	-0.638189	1.49618	0.546507	-0.516283	-0.324972	-0.106513	1.75836	0.928596	-1.25264	-1.07662	3.38314	1.90342	-1.25079	-0.385584	4.82887	3.08928	0.215709	0.701124	9.35503e-06	0.00300193	0.666132	0.154205	5.02895	2.5226	0.312064	0.784618	3.20863e-05
PAX5	607	0.00494153	0.0798173	0.0847588	0.127578	0.0583011	0.941699	0.434428	34.655	38.655	38.8584	38.8139	10.17	4	62	2.1446e-06	4.60055	4.89622	4.63512	4.27172	4.88102	-0.221349	0.939465	-0.0855961	-1.5123	0.879785	-0.280475	0.0152014	-0.245897	-0.6093	-1.21459	1.01059	-1.18583	-1.52552	-2.83219	0.14498	-1.77247	-5.31939	0.00622757	0.885197	0.0812285	1.51563e-06	2.20568	0.0529602	1.09029	5.81941	0.0134603	0.913063	0.133431
CD79A	608	0.061003	0.369124	0.430127	0.575546	0.141825	0.858175	0.436401	132.699	136.699	136.903	136.858	8.45184	4	62	1.65098e-05	6.04594	6.83874	6.94589	6.363	7.16197	-1.37216	0.367927	0.60311	-0.676257	1.07738	-1.11604	-0.323234	-0.216082	-0.798975	-2.16751	-1.25113	-1.16157	-1.73986	-5.21935	-1.41964	-0.720881	-3.22936	2.20756e-06	0.160722	0.473692	0.00198575	5.65609	0.793925	0.324504	2.70208	8.61759e-06	0.241357	0.598022
SYK	609	0.0304915	0.221552	0.252043	0.336358	0.120977	0.879023	0.418015	100.346	104.346	104.55	104.505	8.2437	4	62	2.13208e-05	10.162	9.80718	9.63441	10.2137	9.33332	0.900785	-0.0622996	-0.531241	1.04122	-1.34846	0.828687	0.473859	0.301088	0.880426	1.77607	1.38882	1.23207	1.84092	5.00617	2.69125	1.29772	4.59712	4.88034e-06	0.00913845	0.199191	2.15976e-05	5.31155	2.03913	0.700729	4.6656	1.77049e-05	0.0190953	0.291453
CD2	610	0.0249802	0.290684	0.315664	0.835341	0.0791353	0.920865	0.688237	115.642	119.642	119.845	119.801	30.5774	4	62	4.63483e-14	6.65946	6.94804	5.07998	5.43478	7.24388	0.403028	0.704158	-1.24514	-0.874913	1.01286	-0.58442	-0.295841	-2.1639	-1.8091	-1.49944	-1.2276	-4.48124	-3.50424	-3.08832	-1.47386	-8.16121	-8.26452	0.00301027	0.145579	2.07905e-11	1.37695e-11	2.52139	0.836903	10.6821	10.8611	0.0069764	0.221423	2.33216e-10
LILRA3	611	0.252793	0.650268	0.90306	1.87386	0.279929	0.720071	0.701908	171.814	175.814	176.017	175.973	29.5524	4	62	9.20693e-14	8.05912	7.17814	8.97175	9.55321	6.34898	0.0283703	-0.649347	0.73044	1.17775	-1.28721	1.71014	0.829168	2.62277	3.20423	3.27193	1.77666	6.15932	9.21658	6.00731	2.72331	6.56738	9.72444	1.08199e-07	0.00838379	1.19878e-08	4.34272e-14	6.96578	2.07656	7.92126	13.3622	5.39243e-07	0.0176864	7.35506e-08
RIPK2	612	0.0786232	0.42366	0.502283	1.05685	0.156532	0.843468	0.648918	141.718	145.718	145.921	145.877	24.2448	4	62	4.18481e-12	8.06864	6.84885	8.09197	8.67603	6.57545	0.464172	-0.895392	0.490176	1.14116	-1.20012	1.49319	0.2734	1.51652	2.10059	2.81511	1.20865	2.86101	4.28883	6.51522	1.11955	4.71982	7.92095	1.47341e-08	0.267223	1.38966e-05	5.42707e-11	7.83168	0.573126	4.85709	10.2654	8.89821e-08	0.374623	4.6023e-05
GZMA	613	0.778676	0.400505	1.17918	1.2838	0.660353	0.339647	0.73804	151.525	155.525	155.728	155.684	11.2072	4	62	6.62482e-07	5.83499	6.42658	5.95985	4.79308	6.07198	0.0288397	0.993059	0.232339	-1.66934	0.415107	-0.236991	0.354598	-0.112136	-1.2789	-1.17853	1.27863	-1.08083	-2.42654	-1.05769	1.47342	-0.356421	-4.92932	0.2943	0.145696	0.722735	6.47747e-06	0.531209	0.836552	0.141021	5.18859	0.406477	0.221493	0.798717
PRKCD	614	0.0438434	0.168666	0.21251	0.35232	0.206312	0.793688	0.584659	86.1224	90.1224	90.3258	90.2813	16.8767	4	62	2.07758e-09	8.74869	8.28465	8.22768	9.01093	7.81359	0.706844	-0.282365	-0.403813	1.26586	-1.28653	0.935095	0.471056	0.414084	1.19733	1.91202	1.38612	1.33245	2.29315	6.45816	3.04763	2.03928	7.14545	1.84582e-08	0.00338734	0.0456904	1.2039e-09	7.73381	2.47014	1.34017	8.91941	1.09101e-07	0.00774536	0.081017
CR1	615	0.0284045	0.223053	0.251457	0.295928	0.11296	0.88704	0.332474	100.484	104.484	104.688	104.643	4.92973	4	62	0.00162388	6.06673	6.56815	6.3873	6.58245	6.73638	-1.56663	0.390005	-0.315694	0.44581	1.0465	-0.669655	-0.168238	-0.349085	-0.153937	-1.59069	-1.12369	-1.27375	-1.1126	-4.03312	-0.953027	-1.5001	-0.801357	0.000153319	0.344277	0.138664	0.425986	3.8144	0.463092	0.858036	0.370605	0.000439277	0.461014	0.212058
IL12A	616	0.00422296	0.0742741	0.078497	0.112987	0.0537977	0.946202	0.404444	29.9989	33.9989	34.2023	34.1578	8.89166	4	62	9.67675e-06	4.57064	4.79207	4.49274	4.27018	4.84464	-0.100355	0.848771	-0.434286	-1.38824	1.07411	-0.274001	-0.0525709	-0.351907	-0.574464	-1.20916	-1.03711	-1.27625	-1.48912	-2.86913	-0.52016	-2.63053	-5.20084	0.00562084	0.604805	0.01074	2.36604e-06	2.2502	0.218385	1.969	5.62598	0.0122434	0.712896	0.021974
MAP2K1	617	0.0514747	0.103819	0.155294	0.186347	0.331467	0.668533	0.523895	59.3871	63.3871	63.5905	63.546	5.38134	4	62	0.000873951	7.59477	7.52911	7.7335	8.03908	7.51103	-0.397547	-0.69854	0.238377	1.63909	-0.781381	0.0837366	0.0180724	0.222469	0.528047	1.05976	1.01261	1.16673	1.44198	0.735662	0.148307	1.39294	4.00766	0.46471	0.882582	0.168612	0.000167023	0.332818	0.0542449	0.773112	3.77722	0.589987	0.911249	0.252099
TAL1	618	0.165666	0.448596	0.614262	0.814892	0.269699	0.730301	0.526564	148.525	152.525	152.728	152.684	10.2569	4	62	1.94033e-06	6.44545	6.06586	7.13627	7.52466	6.14303	-0.339762	-0.932461	0.738871	1.34531	-0.811961	0.30242	-0.0771748	0.993232	1.38163	1.23321	-1.05495	1.99064	2.60562	1.27922	-0.30529	2.99493	5.04924	0.205587	0.761168	0.00394112	4.16141e-06	0.687003	0.11852	2.40438	5.38076	0.299248	0.824331	0.00891145
UBE2L3	619	0.0163044	0.141328	0.157632	0.243917	0.103433	0.896567	0.485355	71.8499	75.8499	76.0533	76.0088	11.5981	4	62	4.3006e-07	9.15303	8.7702	8.88439	9.65684	8.78712	0.276077	-0.75289	-0.445986	1.63021	-0.707416	0.365908	-0.0169187	0.0972649	0.869714	1.28869	-1.0118	1.06974	1.8273	2.7697	-0.120524	0.52535	5.69043	0.00739285	0.904458	0.601214	3.68844e-07	2.13119	0.0436116	0.220971	6.43316	0.0157251	0.927649	0.712896
KLRG2	620	0.00422296	0.0742741	0.078497	0.112987	0.0537977	0.946202	0.404444	29.9989	33.9989	34.2023	34.1578	8.89166	4	62	9.67675e-06	4.57064	4.79207	4.49274	4.27018	4.84464	-0.100355	0.848771	-0.434286	-1.38824	1.07411	-0.274001	-0.0525709	-0.351907	-0.574464	-1.20916	-1.03711	-1.27625	-1.48912	-2.86913	-0.52016	-2.63053	-5.20084	0.00562084	0.604805	0.01074	2.36604e-06	2.2502	0.218385	1.969	5.62598	0.0122434	0.712896	0.021974
IL17F	621	0.00653942	0.363215	0.369755	0.427853	0.0176858	0.982314	0.213995	126.709	130.709	130.912	130.868	3.68218	4	62	0.00938588	4.65339	4.78097	5.70487	4.97174	4.8507	-0.81742	-0.509744	1.71839	-0.0496554	-0.341567	-0.197314	-0.069735	0.854164	0.121042	-1.14656	-1.04952	1.80771	1.08752	-0.937394	-0.314476	2.89769	0.497284	0.352193	0.754215	0.00518983	0.620748	0.453219	0.122505	2.28485	0.207085	0.468375	0.81824	0.0114915
CEBPB	622	0.0568879	0.956426	1.01331	2.44955	0.0561405	0.94386	0.646668	188.537	192.537	192.741	192.696	26.4815	4	62	7.91378e-13	10.9355	9.30811	12.1675	12.2202	9.11041	0.124949	-0.961624	0.947574	0.982727	-1.09363	1.82507	0.1977	3.05713	3.10978	3.54325	1.14687	8.32314	8.63249	5.32472	0.544896	6.36705	7.84429	1.48547e-06	0.58778	2.64361e-08	7.37244e-11	5.82814	0.230785	7.5778	10.1324	6.07603e-06	0.702235	1.51064e-07
IL13	623	0.0320049	0.248529	0.280534	0.352847	0.114086	0.885914	0.376421	107.229	111.229	111.433	111.388	6.16855	4	62	0.000303311	4.63097	4.78362	5.77661	4.90881	4.86256	-0.801928	-0.463335	1.73916	-0.185655	-0.288243	-0.231593	-0.0789397	0.914049	0.0462516	-1.17413	-1.05624	1.88433	1.03258	-1.32133	-0.423586	3.72092	0.228088	0.191247	0.673333	0.000429777	0.820329	0.718406	0.17177	3.36676	0.0860121	0.281299	0.76583	0.00115006
PDCD1	624	0.00765986	0.254524	0.262184	0.264265	0.0292156	0.970784	0.115257	105.236	109.236	109.439	109.395	1.20859	4	62	0.316232	4.6475	4.79489	5.09507	4.63186	4.84858	-0.83158	-0.0462925	1.55301	-0.914887	0.239752	-0.20108	-0.0536882	0.246487	-0.216716	-1.14956	-1.03791	1.18632	-1.16209	-1.13979	-0.28839	0.997601	-1.06224	0.258759	0.77401	0.32235	0.292249	0.587104	0.111253	0.491672	0.534247	0.365262	0.833841	0.43776
CCL11	625	0.00428495	0.0800528	0.0843378	0.100059	0.050807	0.949193	0.274082	34.5139	38.5139	38.7173	38.6728	4.51419	4	62	0.00289377	4.5707	4.79115	4.49327	4.47485	4.84683	-0.374656	0.902749	-0.823363	-0.930131	1.2254	-0.276121	-0.05568	-0.353555	-0.371979	-1.21093	-1.03935	-1.2777	-1.29413	-2.78564	-0.530948	-2.5463	-3.24462	0.00707794	0.597352	0.0133855	0.00189709	2.15009	0.22377	1.87337	2.72191	0.0151179	0.710364	0.026946
STAT5B	626	0.0265728	0.299077	0.32565	0.426505	0.0815993	0.918401	0.372361	117.503	121.503	121.707	121.662	6.7625	4	62	0.000139064	9.99904	9.57084	8.94758	9.503	9.17785	1.39322	0.326717	-1.22561	0.157754	-0.65208	0.821185	0.392986	-0.23027	0.325148	1.76686	1.31311	-1.17305	1.25279	4.27758	1.92953	-0.856063	1.46416	6.65108e-05	0.0582444	0.395259	0.148202	4.17711	1.23475	0.403118	0.829147	0.000200444	0.099829	0.515192
CLEC5A	627	0.036306	0.752135	0.788441	2.07971	0.0460478	0.953952	0.671042	173.197	177.197	177.401	177.356	29.7023	4	62	8.31965e-14	5.18607	4.75868	6.50245	7.97888	4.84363	-0.484456	-0.794464	0.470407	1.54136	-0.732845	0.342433	-0.0849495	1.65882	3.13525	1.26789	-1.06065	3.15758	8.78627	1.12746	-0.264508	3.89916	8.92545	0.263893	0.792266	0.000239835	9.97683e-13	0.578572	0.101129	3.62009	12.001	0.370633	0.845298	0.000670318
SYT17	628	0.00422296	0.0742741	0.078497	0.112987	0.0537977	0.946202	0.404444	29.9989	33.9989	34.2023	34.1578	8.89166	4	62	9.67675e-06	4.57064	4.79207	4.49274	4.27018	4.84464	-0.100355	0.848771	-0.434286	-1.38824	1.07411	-0.274001	-0.0525709	-0.351907	-0.574464	-1.20916	-1.03711	-1.27625	-1.48912	-2.86913	-0.52016	-2.63053	-5.20084	0.00562084	0.604805	0.01074	2.36604e-06	2.2502	0.218385	1.969	5.62598	0.0122434	0.712896	0.021974
VTN	629	0.00422296	0.0742741	0.078497	0.112987	0.0537977	0.946202	0.404444	29.9989	33.9989	34.2023	34.1578	8.89166	4	62	9.67675e-06	4.57064	4.79207	4.49274	4.27018	4.84464	-0.100355	0.848771	-0.434286	-1.38824	1.07411	-0.274001	-0.0525709	-0.351907	-0.574464	-1.20916	-1.03711	-1.27625	-1.48912	-2.86913	-0.52016	-2.63053	-5.20084	0.00562084	0.604805	0.01074	2.36604e-06	2.2502	0.218385	1.969	5.62598	0.0122434	0.712896	0.021974
LILRB3	630	0.0958654	0.583831	0.679697	2.10447	0.141041	0.858959	0.75616	161.099	165.099	165.303	165.258	42.7498	4	62	3.5632e-17	6.5378	5.67633	8.99339	8.27631	5.32071	-0.262645	-0.797403	1.26166	0.816539	-1.01815	1.21709	0.355617	3.67267	2.9556	2.32477	1.27953	12.7522	7.75754	4.52599	1.24198	9.7428	9.49913	2.7826e-05	0.218923	4.04352e-14	1.04556e-13	4.55555	0.65971	13.3932	12.9807	8.90896e-05	0.315823	1.03784e-12
TLR3	631	0	1.13019	1.13019	2.51211	0	1	0.577371	196.133	198.133	198.2	198.213	21.1752	4	62	4.79907e-11	6.22724	4.80314	7.45606	7.91902	4.84869	-0.0163811	-1.00513	0.836795	1.15823	-0.973507	1.37855	-0.0455531	2.60737	3.07033	2.60006	-1.03208	6.09393	8.39966	3.72122	-0.117086	5.02634	7.16804	0.000429359	0.90717	4.52956e-06	1.10012e-09	3.36718	0.0423113	5.34394	8.95856	0.00115006	0.929812	1.65493e-05
THY1	632	0.0463059	0.3656	0.411906	0.992453	0.112419	0.887581	0.673703	131.101	135.101	135.305	135.26	27.0613	4	62	5.21212e-13	4.68779	4.93315	7.21563	6.05213	4.87347	-0.805584	-0.576982	1.54959	0.465563	-0.632583	-0.185685	0.0596772	2.34216	1.17866	-1.13736	1.04223	5.0706	2.26366	-0.873528	0.264066	7.86172	4.7927	0.385746	0.792605	6.87635e-11	1.06711e-05	0.413698	0.100943	10.1626	4.97179	0.505102	0.845298	6.97842e-10
ITGA6	633	0.268102	0.267313	0.535415	0.608372	0.500736	0.499264	0.628702	122.209	126.209	126.412	126.368	8.39415	4	62	1.77191e-05	6.33449	6.62335	6.03421	5.74807	6.85479	0.0349649	0.686182	-0.642005	-1.28709	1.20795	-0.520301	-0.231441	-0.820583	-1.10673	-1.43425	-1.17401	-1.76612	-2.15356	-2.84459	-1.17944	-3.19592	-5.2261	0.00601745	0.242729	0.00219378	2.15245e-06	2.22059	0.614878	2.65881	5.66707	0.0130336	0.345954	0.00519357
IKBKB	634	0	0.114016	0.114016	0.146116	0	1	0.26698	53.9176	55.9176	55.9842	55.997	5.6454	4	62	0.0006109	6.91992	7.38233	7.05979	7.36655	7.26534	-1.37997	0.90827	-0.687812	0.830163	0.329349	-0.345426	0.116991	-0.205552	0.101207	-1.27053	1.08447	-1.15313	1.07267	-2.9357	0.946743	-1.24757	0.743903	0.00466348	0.347445	0.216882	0.459745	2.33129	0.459114	0.663777	0.337483	0.010431	0.464467	0.313172
BCL2L1	635	0.355345	0.335855	0.6912	0.965896	0.514099	0.485901	0.706362	136.695	140.695	140.898	140.854	14.7871	4	62	1.54544e-08	10.0939	9.88923	8.11517	9.31609	9.74782	0.837636	0.57844	-1.6681	-0.147346	0.399372	0.34609	0.141407	-1.63265	-0.431734	1.27111	1.10298	-3.10082	-1.34885	1.68792	0.642765	-5.67222	-1.81864	0.0964507	0.522747	3.9558e-07	0.0737962	1.01569	0.281709	6.40277	1.13197	0.155127	0.646342	1.82941e-06
TYROBP	636	0.0152871	0.230946	0.246233	0.413691	0.0620838	0.937916	0.496226	100.686	104.686	104.89	104.845	12.7376	4	62	1.25967e-07	11.416	11.6175	10.2068	10.7497	11.1932	0.671406	1.02818	-1.46881	-0.507831	0.277051	0.22279	0.42435	-0.986318	-0.443417	1.16699	1.34197	-1.98112	-1.35982	1.32222	2.37779	-4.17841	-2.27517	0.190952	0.0205139	9.35945e-05	0.026364	0.719076	1.68795	4.02875	1.57899	0.281	0.0396378	0.000275594
CD74	637	0.0467693	0.315335	0.362104	1.31946	0.12916	0.87084	0.789308	122.512	126.512	126.715	126.67	52.8027	4	62	2.69175e-19	12.1485	12.6319	10.0505	10.2691	12.6621	0.462113	0.836916	-1.1644	-0.994982	0.860353	-0.513666	-0.0302298	-2.61161	-2.39308	-1.42767	-1.02117	-6.11183	-5.25279	-2.60024	-0.143802	-9.4316	-10.4702	0.0116311	0.886123	1.36169e-13	2.45322e-15	1.93438	0.0525059	12.8659	14.6103	0.023646	0.913407	2.95354e-12
PTGER4	638	0.0390485	0.133508	0.172557	0.173789	0.226294	0.773706	0.33555	72.1987	76.1987	76.4021	76.3576	1.59437	4	62	0.18704	8.68043	8.57487	8.49349	8.86194	8.77397	0.0235486	-0.689209	-1.23877	1.24924	0.655193	-0.0935407	-0.199093	-0.280479	0.0879727	-1.06699	-1.14798	-1.2146	1.06288	-0.725831	-1.44634	-1.55176	0.589825	0.470674	0.15312	0.12581	0.557451	0.32728	0.814969	0.900284	0.253793	0.595594	0.230841	0.195016
RPS6KA5	639	0	0.17256	0.17256	0.38873	0	1	0.582995	79.6109	81.6109	81.6776	81.6904	21.6698	4	62	3.19732e-11	7.68825	7.59101	6.4068	6.58557	7.41879	0.921212	0.758396	-1.22449	-0.925149	0.470031	0.269452	0.172216	-1.012	-0.833224	1.20535	1.12679	-2.0167	-1.78166	1.86145	1.13283	-4.99267	-4.97831	0.0674232	0.261647	5.12979e-06	5.40883e-06	1.17119	0.582285	5.2899	5.2669	0.113292	0.368719	1.85443e-05
PIK3C2G	640	0.000345259	0.0981931	0.0985384	0.114442	0.0035038	0.996496	0.196513	44.8516	48.8516	49.055	49.0105	3.68749	4	62	0.00931501	4.58101	4.78014	4.72864	4.43056	4.84862	-0.55289	0.633692	0.326814	-1.44937	1.04176	-0.267612	-0.068481	-0.119981	-0.418059	-1.20381	-1.04861	-1.08672	-1.33613	-2.44955	-0.596458	-0.784284	-3.30949	0.017142	0.553041	0.43586	0.00156026	1.76594	0.257243	0.360653	2.8068	0.0335861	0.673533	0.558655
NR3C1	641	0	0.0926645	0.0926645	0.108216	0	1	0.195607	41.0617	43.0617	43.1284	43.1411	3.76918	4	62	0.00829012	7.99805	8.23445	7.80015	8.26659	8.03185	-0.357956	0.883389	-1.3971	1.05215	-0.180479	-0.0337986	0.202601	-0.231692	0.23474	-1.0237	1.15077	-1.17421	1.17669	-0.318626	1.81865	-1.55984	1.9139	0.751081	0.0737956	0.123889	0.0602512	0.124313	1.13197	0.906968	1.22003	0.81707	0.122994	0.192424
BCL3	642	0.0987081	0.432915	0.531624	0.944604	0.185673	0.814327	0.600958	143.957	147.957	148.16	148.116	18.0352	4	62	7.19524e-10	6.84322	6.07428	7.47065	7.5381	5.66393	0.150153	-0.772172	0.902751	0.983653	-1.26439	1.17928	0.410353	1.80672	1.87416	2.26464	1.32901	3.49845	3.66589	5.0862	1.65908	5.55712	6.98502	3.62821e-06	0.10215	6.14783e-07	2.28242e-09	5.44031	0.990762	6.21128	8.6416	1.34637e-05	0.162679	2.70891e-06
LILRB4	643	0.000315832	0.33224	0.332556	0.911657	0.00094971	0.99905	0.657948	120.282	124.282	124.485	124.44	29.7638	4	62	7.98184e-14	4.7604	4.77962	6.93061	6.29688	4.84887	-0.747267	-0.728436	1.37854	0.75777	-0.660603	-0.0884752	-0.0692504	2.08174	1.448	-1.06325	-1.04917	4.23317	2.7283	-0.440428	-0.328184	7.40054	6.23407	0.661159	0.743878	4.34624e-10	4.45879e-08	0.179694	0.128498	9.36189	7.35078	0.756045	0.813617	3.61795e-09
CCL16	644	0.00422296	0.0742741	0.078497	0.112987	0.0537977	0.946202	0.404444	29.9989	33.9989	34.2023	34.1578	8.89166	4	62	9.67675e-06	4.57064	4.79207	4.49274	4.27018	4.84464	-0.100355	0.848771	-0.434286	-1.38824	1.07411	-0.274001	-0.0525709	-0.351907	-0.574464	-1.20916	-1.03711	-1.27625	-1.48912	-2.86913	-0.52016	-2.63053	-5.20084	0.00562084	0.604805	0.01074	2.36604e-06	2.2502	0.218385	1.969	5.62598	0.0122434	0.712896	0.021974
EGR2	645	0.166365	0.752409	0.918774	1.3256	0.181073	0.818927	0.505373	178.088	182.088	182.292	182.247	10.362	4	62	1.71995e-06	7.08964	6.54603	5.46313	5.18967	6.59503	1.12625	0.455632	-0.880304	-1.21766	0.516076	0.494609	-0.0489958	-1.1319	-1.40536	1.40894	-1.03454	-2.19148	-2.64884	1.61831	-0.150303	-2.64123	-3.97355	0.110672	0.881014	0.0104405	0.000187247	0.955961	0.0550173	1.98128	3.72758	0.174448	0.910272	0.0216398
EBI3	646	0.0157378	0.296973	0.312711	0.841473	0.0503272	0.949673	0.679705	115.772	119.772	119.975	119.931	30.4246	4	62	5.12926e-14	4.66271	4.77919	6.90803	6.09111	4.8566	-0.801001	-0.683907	1.4561	0.634895	-0.606089	-0.193895	-0.0774117	2.05143	1.23451	-1.14385	-1.05512	4.14517	2.35301	-1.01563	-0.38329	7.6711	5.59096	0.313752	0.702816	1.47343e-10	5.40166e-07	0.503413	0.153158	9.83167	6.26747	0.427781	0.785725	1.37105e-09
CFI	647	0.00307347	0.309833	0.312907	0.325377	0.00982232	0.990178	0.113005	116.441	120.441	120.644	120.6	1.67279	4	62	0.167653	4.96021	5.11348	5.62149	5.15081	5.18555	-0.994256	-0.375026	1.67735	-0.224214	-0.0838553	-0.225343	-0.0720707	0.435935	-0.0347416	-1.16905	-1.05122	1.35279	-1.02437	-1.16021	-0.352683	1.60281	-0.154692	0.250412	0.725522	0.11406	0.877566	0.601345	0.139349	0.942865	0.05672	0.355587	0.800935	0.179146
CCRL2	648	0.448771	0.503633	0.952404	1.52585	0.471198	0.528802	0.720662	160.749	164.749	164.953	164.908	25.865	4	62	1.24149e-12	9.11912	7.92627	8.526	9.88314	7.30828	0.564263	-0.62375	-0.0264534	1.32519	-1.23924	1.81084	0.617998	1.21773	2.57486	3.50848	1.53474	2.3258	5.95814	7.21412	2.29553	3.4561	8.86014	9.15261e-10	0.0250982	0.000994997	1.29172e-12	9.03845	1.60036	3.00218	11.8888	7.04751e-09	0.0474831	0.00248749
LITAF	649	0.216867	0.509897	0.726764	1.19208	0.298401	0.701599	0.633307	157.219	161.219	161.422	161.378	19.9396	4	62	1.35494e-10	11.5381	10.5017	11.8384	12.3394	10.1552	0.28704	-0.841831	0.614195	1.15982	-1.21923	1.38289	0.346483	1.68325	2.18418	2.6079	1.27146	3.2115	4.54469	5.48437	1.28429	4.75817	7.48354	8.11274e-07	0.203818	1.20959e-05	3.11906e-10	6.09083	0.690758	4.91736	9.50598	3.49961e-06	0.296953	4.05832e-05
GNB1	650	0.0170563	0.0891683	0.106225	0.170897	0.160569	0.839431	0.543442	45.2247	49.2247	49.428	49.3835	14.4806	4	62	2.09712e-08	11.1013	10.7581	11.0639	11.3551	10.5389	0.433261	-0.645493	0.315745	1.23093	-1.33444	0.562371	0.21918	0.524985	0.816139	1.47669	1.16407	1.43892	1.76069	5.34796	1.9558	3.56093	6.70728	1.36075e-06	0.0549987	0.000716555	6.88665e-09	5.86622	1.25965	3.14475	8.16199	5.64841e-06	0.0954344	0.00184069
IFIT2	651	0.389609	3.33547	3.72508	13.76	0.104591	0.895409	0.784773	267.892	271.892	272.095	272.051	52.0016	4	62	3.8675e-19	13.8423	8.10362	13.0842	14.3922	6.6602	0.735957	-0.872484	0.523481	0.890091	-1.27704	7.18211	1.44342	6.42402	7.73203	145.221	2.71964	85.8665	212.605	11.1899	2.11631	7.14181	10.4129	1.62088e-16	0.0383407	1.22151e-09	3.05253e-15	15.7902	1.41634	8.9131	14.5153	1.01884e-14	0.0690581	9.1539e-09
TLR4	652	0.133171	0.723749	0.85692	1.56257	0.155406	0.844594	0.594246	174.884	178.884	179.087	179.043	18.4788	4	62	4.83827e-10	11.4926	10.0184	11.0474	11.4865	9.29114	0.845557	-0.664663	0.389491	0.839281	-1.40967	2.20147	0.727246	1.75627	2.19534	4.59948	1.65548	3.37824	4.57999	7.34946	2.27865	4.18217	6.33388	5.33053e-10	0.0261438	9.23971e-05	3.01232e-08	9.27323	1.58263	4.03434	7.5211	4.37814e-09	0.0492797	0.000272756
IFI35	653	0.0191725	0.680742	0.699915	1.74712	0.0273927	0.972607	0.641658	166.142	170.142	170.346	170.301	26.7593	4	62	6.47402e-13	6.70675	4.95273	6.91596	7.42897	4.84634	0.450962	-1.02314	0.626789	1.05793	-1.11254	1.8604	0.106383	2.06962	2.58263	3.63109	1.07653	4.19776	5.99031	6.44931	0.349569	5.12285	7.7419	1.91148e-08	0.727847	3.16586e-06	1.11015e-10	7.71863	0.13796	5.49951	9.95462	1.12354e-07	0.802064	1.19492e-05
TFRC	654	0	0.363946	0.363946	0.424407	0	1	0.194431	125.879	127.879	127.946	127.958	3.74105	4	62	0.00862944	5.07731	4.85012	4.87935	5.66484	4.86807	0.0270701	-0.629213	-0.544784	1.7243	-0.577373	0.20924	-0.0179457	0.0112813	0.796769	1.15608	-1.01252	1.00785	1.73721	0.995326	-0.0812838	0.0383235	3.27796	0.323447	0.935478	0.969553	0.00171621	0.490197	0.0289664	0.0134285	2.76543	0.43863	0.951229	0.97589
CASP10	655	0.173916	0.562902	0.736817	0.917753	0.236036	0.763964	0.470238	161.685	165.685	165.888	165.844	6.73498	4	62	0.00014413	8.47948	7.61845	7.37544	8.45514	7.45178	1.10333	-0.471028	-0.915357	1.05882	-0.775767	1.0277	0.166665	-0.0763435	1.00336	2.03877	1.12246	-1.05434	2.00466	3.88292	0.589385	-0.205652	3.2755	0.000253073	0.557745	0.837737	0.00172898	3.59676	0.253565	0.0768924	2.76221	0.000703487	0.677124	0.875842
IL18RAP	656	0.042347	2.26194	2.30429	5.67242	0.0183775	0.981623	0.63098	240.141	244.141	244.345	244.3	25.8335	4	62	1.2706e-12	7.18619	5.12692	8.72132	9.97859	4.83944	0.00703784	-0.916191	0.69528	1.25895	-1.04507	2.34675	0.287478	3.88189	5.13915	5.08678	1.2205	14.7423	35.2403	4.46724	0.5194	5.27665	8.45993	3.42617e-05	0.605331	1.78031e-06	6.32275e-12	4.46519	0.218007	5.74951	11.1991	0.000108121	0.71308	7.14908e-06
PTK2	657	0.0418529	0.147266	0.189119	0.361759	0.221305	0.778695	0.647649	78.139	82.139	82.3424	82.2979	21.5336	4	62	3.57374e-11	7.07148	6.90805	5.56358	6.40941	6.98973	0.768819	0.508693	-1.63125	-0.284975	0.638715	0.0817407	-0.0816889	-1.42615	-0.580326	1.05829	-1.05826	-2.68729	-1.49519	0.603974	-0.565174	-7.51355	-3.70508	0.548065	0.573995	2.76643e-10	0.00045233	0.261168	0.241092	9.55808	3.34454	0.66906	0.691398	2.41377e-09
CDH5	658	0.000138607	0.0863218	0.0864604	0.106067	0.00160313	0.998397	0.236593	36.7563	40.7563	40.9597	40.9152	4.75576	4	62	0.00206644	4.58123	4.78002	4.4933	4.42075	4.84866	-0.237083	0.844869	-0.715665	-1.11053	1.21841	-0.267424	-0.0686327	-0.355356	-0.427907	-1.20366	-1.04872	-1.2793	-1.34528	-2.61143	-0.637964	-2.47814	-3.61389	0.0112941	0.525846	0.0159439	0.000605827	1.94715	0.279141	1.79741	3.21765	0.023037	0.648881	0.0314657
CTSS	659	0.285966	0.647358	0.933325	1.15122	0.306395	0.693605	0.51831	172.224	176.224	176.427	176.383	6.82493	4	62	0.000128241	11.603	11.354	9.92399	11.9133	11.0877	0.558658	0.232541	-1.63993	0.964866	-0.116135	0.515339	0.266284	-1.16372	0.82556	1.42933	1.20271	-2.24035	1.77222	1.81366	0.875756	-2.91911	2.51006	0.0745704	0.384543	0.00488674	0.0146954	1.12743	0.415055	2.31098	1.83282	0.12415	0.504137	0.0108909
GTF3C1	660	0.00300287	0.290365	0.293367	0.365116	0.0102359	0.989764	0.259459	112.439	116.439	116.643	116.598	5.06794	4	62	0.00134215	5.70862	5.78398	6.55794	6.29713	5.68926	-0.75436	-0.564079	1.39009	0.731582	-0.803235	0.0193568	0.0947185	0.868677	0.607871	1.01351	1.06786	1.82599	1.52401	0.102943	0.478739	3.29903	2.79575	0.918341	0.633808	0.00161045	0.0068846	0.0369962	0.198042	2.79305	2.16212	0.939385	0.736931	0.00389646
CD24	661	0.419697	0.426861	0.846558	1.07295	0.495769	0.504231	0.663732	151.103	155.103	155.307	155.262	11.971	4	62	2.86286e-07	6.04924	6.45689	5.16087	5.56487	6.99333	0.00582763	0.570961	-1.22577	-0.66568	1.31466	-0.944089	-0.536446	-1.83247	-1.42846	-1.92397	-1.4504	-3.56145	-2.6916	-4.08469	-2.16352	-5.64799	-5.33813	0.000128808	0.0343632	4.34147e-07	1.41221e-06	3.89006	1.46391	6.36236	5.8501	0.000373215	0.0628496	1.99256e-06
CTNNB1	662	0.00162136	0.0676249	0.0692463	0.0788426	0.0234144	0.976586	0.209064	22.7752	26.7752	26.9785	26.934	3.3517	4	62	0.0150697	8.45261	8.4412	8.47039	8.64691	8.26397	-0.0176969	-0.101782	0.113231	1.41317	-1.40693	0.188641	0.177223	0.206419	0.382935	1.13969	1.13071	1.15382	1.30399	2.07566	1.84944	1.6218	3.64365	0.0420798	0.0691629	0.10992	0.000550957	1.37593	1.16013	0.958922	3.25888	0.0751337	0.115899	0.173351
C8G	663	0.00422296	0.0742741	0.078497	0.112987	0.0537977	0.946202	0.404444	29.9989	33.9989	34.2023	34.1578	8.89166	4	62	9.67675e-06	4.57064	4.79207	4.49274	4.27018	4.84464	-0.100355	0.848771	-0.434286	-1.38824	1.07411	-0.274001	-0.0525709	-0.351907	-0.574464	-1.20916	-1.03711	-1.27625	-1.48912	-2.86913	-0.52016	-2.63053	-5.20084	0.00562084	0.604805	0.01074	2.36604e-06	2.2502	0.218385	1.969	5.62598	0.0122434	0.712896	0.021974
ICAM5	664	0.0641301	0.428359	0.492489	0.921708	0.130216	0.869784	0.590396	141.54	145.54	145.743	145.698	17.9045	4	62	8.09498e-10	4.55617	4.77325	6.57697	6.03799	4.87464	-0.907708	-0.663736	1.3635	0.757723	-0.549776	-0.318469	-0.101395	1.70233	1.16335	-1.24701	-1.07281	3.25426	2.23976	-1.38314	-0.413797	5.27453	4.36685	0.171584	0.68045	1.79453e-06	4.87515e-05	0.765523	0.167203	5.74605	4.31201	0.255798	0.769896	7.18747e-06
IL23R	665	0	0.0634747	0.0634747	0.124431	0	1	0.520795	17.6043	19.6043	19.671	19.6838	16.8452	4	62	2.13938e-09	4.63051	4.81897	4.49324	4.26962	5.04495	-0.0704092	0.562966	-0.531716	-1.28323	1.32239	-0.414443	-0.225975	-0.55171	-0.775331	-1.33278	-1.16957	-1.46582	-1.71158	-4.72068	-2.45089	-4.48782	-7.63796	1.38538e-05	0.0170842	3.18576e-05	1.6822e-10	4.85843	1.76741	4.49679	9.77412	4.59307e-05	0.0335154	0.000101261
BIRC2	666	0.0643642	0.145672	0.210036	0.352689	0.306443	0.693557	0.646196	79.7496	83.7496	83.953	83.9085	20.4415	4	62	8.85193e-11	9.46681	8.95724	9.12481	10.0781	8.84355	0.347218	-0.677255	-0.340346	1.5762	-0.905821	0.623258	0.113688	0.281266	1.23455	1.54035	1.08199	1.21526	2.35308	4.62396	0.7882	1.48731	7.91278	1.96196e-05	0.433583	0.142	5.60713e-11	4.70731	0.362928	0.84771	10.2513	6.36088e-05	0.556431	0.216408
PDGFA	667	0.0335727	0.36867	0.402242	0.589057	0.0834638	0.916536	0.440212	130.546	134.546	134.75	134.705	9.72483	4	62	3.59685e-06	4.70767	4.79606	6.03171	5.71164	4.85689	-0.845105	-0.699528	1.33556	0.808417	-0.59934	-0.149222	-0.0608319	1.17482	0.854752	-1.10897	-1.04307	2.25764	1.80845	-0.700035	-0.26895	3.93332	3.46636	0.486524	0.788861	0.000214128	0.000963781	0.312895	0.102999	3.66933	3.01602	0.609888	0.842765	0.000603951
TREM2	668	0.00451105	0.177199	0.18171	0.435082	0.0248256	0.975174	0.624795	82.5694	86.5694	86.7728	86.7283	24.7369	4	62	2.87872e-12	4.57439	4.78583	5.89135	5.86227	4.85077	-0.977616	-0.64343	1.1039	1.05793	-0.540786	-0.27638	-0.0649421	1.04058	1.0115	-1.21115	-1.04604	2.05706	2.01601	-1.8784	-0.418521	5.04988	5.94474	0.0650309	0.677012	4.15157e-06	1.38012e-07	1.18688	0.169403	5.38179	6.86008	0.109931	0.768312	1.52949e-05
KIR2DL4	669	0	0.27073	0.27073	0.34984	0	1	0.273032	107.534	109.534	109.601	109.614	5.82144	4	62	0.000481999	4.76205	4.77965	5.71853	5.31348	4.84869	-0.766957	-0.725103	1.50821	0.544722	-0.560873	-0.0866374	-0.0690421	0.869839	0.46479	-1.06189	-1.04902	1.82746	1.38012	-0.477834	-0.362584	3.42606	2.21707	0.634449	0.718149	0.00109204	0.0302944	0.197603	0.143786	2.96176	1.51864	0.737119	0.795643	0.00271249
IRF5	670	0.0708727	0.502292	0.573164	1.46795	0.123652	0.876348	0.697892	151.187	155.187	155.391	155.346	30.6913	4	62	4.29855e-14	7.48945	6.12137	8.37665	8.33481	5.95318	0.20061	-0.970473	0.960064	0.924244	-1.11445	1.53627	0.168191	2.42348	2.38163	2.90044	1.12365	5.36462	5.21125	6.16307	0.634248	6.93637	8.25805	5.88934e-08	0.528252	2.77041e-09	1.41296e-11	7.22993	0.277158	8.55746	10.8499	3.15464e-07	0.650807	1.9132e-08
TNFSF8	671	0	0.216411	0.216411	0.330874	0	1	0.385581	93.6497	95.6497	95.7164	95.7291	9.72707	4	62	3.58743e-06	7.68163	7.10315	7.3501	7.81403	6.89434	0.81346	-0.690058	-0.0482134	1.15759	-1.23278	0.787286	0.208812	0.45576	0.919691	1.72582	1.15574	1.3715	1.89171	4.8566	1.22653	2.0078	4.90673	8.45458e-06	0.224636	0.0490271	7.03724e-06	5.07291	0.64852	1.30956	5.1526	2.93245e-05	0.323308	0.0860419
TRAF6	672	0.0053934	0.129104	0.134497	0.137136	0.0401005	0.9599	0.140868	63.6649	67.6649	67.8682	67.8237	1.40271	4	62	0.243568	6.31929	6.31562	6.46028	6.25809	6.09421	0.225412	0.197622	1.29231	-0.237648	-1.4777	0.225075	0.221402	0.366071	0.163879	1.16884	1.16587	1.28884	1.1203	1.78955	1.6659	2.07803	1.12665	0.0784099	0.100779	0.0418531	0.264234	1.10563	0.99663	1.37827	0.578012	0.129596	0.160829	0.0748148
MYL2	673	0.0265205	0.231352	0.257872	0.28782	0.102843	0.897157	0.285899	102.386	106.386	106.589	106.544	3.48597	4	62	0.0124283	4.56627	4.77793	5.35188	4.96061	4.87189	-1.17335	-0.441698	1.54223	0.189762	-0.116941	-0.305614	-0.0939508	0.47999	0.0887279	-1.23594	-1.06729	1.39473	1.06343	-1.8081	-0.523133	2.02635	0.453753	0.0754411	0.602746	0.0470359	0.651591	1.12239	0.219865	1.32757	0.186025	0.125364	0.712896	0.083068
TNFSF12	674	0.0833063	0.229113	0.312419	0.347397	0.266649	0.733351	0.432604	106.785	110.785	110.989	110.944	3.54749	4	62	0.0113797	5.94694	5.81154	6.38954	5.57199	5.65551	0.223298	-0.197595	1.59916	-0.942237	-0.682624	0.291429	0.15603	0.734033	-0.0835156	1.22385	1.11422	1.66328	-1.0596	1.725	0.863774	3.09728	-0.427099	0.0895094	0.391042	0.00293273	0.670787	1.04813	0.407777	2.53273	0.173415	0.145023	0.510775	0.00681722
CCBP2	675	0.000429747	0.352677	0.353106	0.43859	0.00121705	0.998783	0.245455	123.998	127.998	128.201	128.157	5.00295	4	62	0.00146781	4.745	4.77969	5.86044	5.19091	4.84884	-0.726033	-0.651945	1.65601	0.226229	-0.504265	-0.103847	-0.0691541	1.01159	0.342068	-1.07464	-1.0491	2.01614	1.26757	-0.50173	-0.318062	3.49031	1.42934	0.617635	0.751507	0.000894458	0.157927	0.209268	0.124067	3.04844	0.801544	0.722764	0.81707	0.00225814
IL17RA	676	0.080921	0.27401	0.354931	0.594844	0.227991	0.772009	0.601679	116.824	120.824	121.028	120.983	17.5307	4	62	1.13682e-09	10.1034	9.54084	9.94222	10.4179	8.84661	0.550422	-0.37888	0.284202	1.06998	-1.52573	1.25676	0.694223	1.09561	1.57127	2.38958	1.61801	2.13703	2.97165	6.80679	3.52004	4.23088	7.35325	4.63868e-09	0.000814983	7.81538e-05	5.25036e-10	8.33361	3.08885	4.10705	9.27981	3.08577e-08	0.00207279	0.000233024
CD3EAP	677	0.0055913	0.0712355	0.0768268	0.112234	0.072778	0.927222	0.429899	28.2017	32.2017	32.4051	32.3606	9.54221	4	62	4.4572e-06	4.56761	4.8083	4.4922	4.27071	4.84335	-0.1219	0.896008	-0.440812	-1.37753	1.04423	-0.27574	-0.0350484	-0.351149	-0.572642	-1.21062	-1.02459	-1.27558	-1.48724	-2.94456	-0.353034	-2.67644	-5.28658	0.00454808	0.725261	0.00950763	1.71504e-06	2.34217	0.139506	2.02193	5.76573	0.0101951	0.800933	0.0198129
IFNG	678	0.00305084	0.0865003	0.0895511	0.135196	0.0340682	0.965932	0.414042	38.5546	42.5546	42.758	42.7134	9.82761	4	62	3.18977e-06	4.67472	4.90392	4.48642	4.31637	4.94843	0.0324438	0.882268	-0.665753	-1.2963	1.04734	-0.273712	-0.0445196	-0.462011	-0.632065	-1.20891	-1.03134	-1.37746	-1.54978	-2.66013	-0.409763	-3.20593	-5.31172	0.00992965	0.683392	0.00212946	1.56012e-06	2.00307	0.16533	2.67173	5.80684	0.0206505	0.771422	0.00506857
IL6R	679	0.0542308	0.256583	0.310814	0.372323	0.17448	0.82552	0.398695	111.186	115.186	115.39	115.345	5.5513	4	62	0.000693801	9.26728	8.97256	8.51399	8.98275	8.51454	1.26876	0.372173	-1.0229	0.403174	-1.0212	0.752736	0.458019	-0.000558103	0.468209	1.68499	1.37365	-1.00039	1.38339	4.21823	2.40706	-0.00223057	2.26739	8.16339e-05	0.0190729	0.998227	0.0268628	4.08813	1.71958	0.000770502	1.57085	0.000242736	0.0370863	0.998227
TICAM1	680	0	0.484967	0.484967	0.708138	0	1	0.356657	143.678	145.678	145.744	145.757	8.59291	4	62	1.38974e-05	5.23094	4.80454	6.35949	5.84134	4.84869	-0.277276	-0.912733	1.40457	0.632385	-0.846943	0.382255	-0.0441462	1.5108	0.99265	1.30338	-1.03107	2.84967	1.98984	1.5752	-0.173221	4.44605	3.53778	0.120299	0.863042	3.69201e-05	0.0007708	0.919737	0.063968	4.43274	3.11306	0.187796	0.895912	0.000115563
GNAQ	681	0.0196302	0.235525	0.255155	0.642223	0.0769344	0.923066	0.671152	102.509	106.509	106.712	106.668	27.2987	4	62	4.39976e-13	9.38233	9.57707	7.52196	8.52152	9.5068	0.545557	0.766713	-1.56717	-0.432015	0.686917	-0.124475	0.0702646	-1.98485	-0.985281	-1.09011	1.04991	-3.95821	-1.9797	-0.730848	0.389009	-8.31765	-5.00111	0.467625	0.698603	1.11416e-11	4.97241e-06	0.330102	0.15577	10.9531	5.30343	0.59271	0.783366	1.38614e-10
STAT3	682	0.0579761	0.321595	0.379571	0.646193	0.152741	0.847259	0.563767	124.507	128.507	128.711	128.666	16.3114	4	62	3.53155e-09	10.6906	9.7528	10.0447	10.7163	9.32095	0.969516	-0.583284	-0.0999119	1.01201	-1.29833	1.36968	0.431857	0.723792	1.39534	2.58413	1.34897	1.65152	2.63051	6.86019	2.03031	2.58586	6.03987	3.7515e-09	0.046621	0.012077	9.53058e-08	8.4258	1.33142	1.91804	7.02088	2.53947e-08	0.0823825	0.0244235
CD1D	683	0.140962	0.243582	0.384544	0.84492	0.36657	0.63343	0.754355	113.139	117.139	117.343	117.298	33.503	4	62	7.07316e-15	6.72838	6.10193	7.61734	7.31962	5.45281	0.0954627	-0.613426	1.10141	0.764512	-1.34796	1.27556	0.649115	2.16453	1.86681	2.42093	1.56821	4.4832	3.64724	7.31335	3.47439	8.84361	9.24587	6.1579e-10	0.000939983	1.37903e-12	2.8215e-13	9.21057	3.02688	11.8604	12.5495	5.03085e-09	0.00236146	2.12621e-11
IL28B	684	0.0209543	0.709102	0.730056	1.18713	0.0287022	0.971298	0.451117	168.736	172.736	172.94	172.895	11.6909	4	62	3.88462e-07	4.80348	4.7794	7.01768	5.93242	4.85811	-0.682954	-0.707319	1.5582	0.459729	-0.627652	-0.0546369	-0.0787096	2.15957	1.07431	-1.0386	-1.05607	4.46781	2.10571	-0.185555	-0.253333	5.23677	3.15494	0.8534	0.800849	2.06797e-06	0.00247656	0.0688476	0.0964492	5.68446	2.60615	0.887397	0.849885	8.15536e-06
CD1A	685	0.0543652	0.101794	0.156159	0.245453	0.34814	0.65186	0.646104	58.5849	62.5849	62.7883	62.7438	15.7133	4	62	6.25213e-09	4.84462	5.27212	4.68969	4.31165	5.03318	0.039646	1.21928	-0.387864	-1.43101	0.55995	-0.188558	0.238942	-0.343488	-0.721526	-1.13962	1.18013	-1.26882	-1.64893	-1.67265	1.97932	-2.17144	-5.52913	0.0994354	0.0522251	0.033733	6.84091e-07	1.00246	1.28212	1.47195	6.16489	0.159428	0.0909699	0.0618806
TCF4	686	0.0632376	0.263024	0.326261	0.324057	0.193825	0.806175	0.294325	113.305	117.305	117.509	117.464	1.24809	4	62	0.300059	6.16201	6.19206	6.10726	6.48314	6.42564	-0.664079	-0.485961	-0.988722	1.23985	0.89891	-0.263621	-0.233579	-0.318377	0.0575049	-1.20049	-1.17575	-1.24693	1.04066	-1.45839	-1.21099	-1.25603	0.274899	0.149781	0.230496	0.213819	0.784308	0.824544	0.637337	0.669954	0.105514	0.226695	0.330352	0.309766
ATM	687	0.0608085	0.235022	0.29583	0.88434	0.205552	0.794448	0.7694	106.669	110.669	110.873	110.828	43.9879	4	62	1.86987e-17	7.21974	7.93831	6.09254	6.1501	8.24633	0.0909776	0.814615	-1.04418	-0.986215	1.12481	-1.02658	-0.308017	-2.15379	-2.09622	-2.03719	-1.238	-4.44994	-4.27589	-6.0064	-1.68827	-8.98585	-10.5979	1.08582e-07	0.096384	7.85886e-13	1.5082e-15	6.96424	1.016	12.1046	14.8215	5.40279e-07	0.155101	1.34474e-11
CD1C	688	0.113185	0.297398	0.410583	1.34751	0.275669	0.724331	0.810325	123.198	127.198	127.401	127.357	53.722	4	62	1.78513e-19	6.48451	7.334	5.14997	5.02796	7.70195	0.118239	0.811764	-0.971278	-1.07088	1.11216	-1.21744	-0.36795	-2.55199	-2.67399	-2.32534	-1.29052	-5.86442	-6.38192	-6.32414	-1.78726	-9.4498	-12.0008	3.13003e-08	0.0787835	1.26808e-13	8.16467e-18	7.50445	1.10356	12.8969	17.0881	1.75921e-07	0.130109	2.80984e-12
IRF8	689	0.100723	0.191309	0.292031	0.410056	0.344904	0.655096	0.60177	97.6221	101.622	101.825	101.781	13.8584	4	62	3.9323e-08	6.95218	6.8305	6.15885	5.91075	6.92681	0.815954	0.565453	-0.8172	-1.32793	0.763722	0.0253728	-0.0963124	-0.767961	-1.01606	1.01774	-1.06904	-1.70286	-2.02238	0.164186	-0.582018	-3.54151	-5.6798	0.870119	0.562665	0.000761793	3.84224e-07	0.0604216	0.24975	3.11816	6.41542	0.901362	0.681482	0.00194716
CCL5	690	0.157412	0.24411	0.401521	0.973833	0.392038	0.607962	0.786814	113.903	117.903	118.106	118.062	40.5378	4	62	1.16696e-16	7.8552	8.34192	6.15319	6.71573	8.50055	0.33112	0.802525	-1.31732	-0.772487	0.956161	-0.645354	-0.158629	-2.34736	-1.78483	-1.56412	-1.11623	-5.08894	-3.44577	-3.69518	-0.847636	-9.5772	-8.82785	0.000466987	0.399901	7.70729e-14	1.46782e-12	3.3307	0.398047	13.1131	11.8333	0.00123886	0.520581	1.79837e-12
TNFRSF9	691	0.00422296	0.0742741	0.078497	0.112987	0.0537977	0.946202	0.404444	29.9989	33.9989	34.2023	34.1578	8.89166	4	62	9.67675e-06	4.57064	4.79207	4.49274	4.27018	4.84464	-0.100355	0.848771	-0.434286	-1.38824	1.07411	-0.274001	-0.0525709	-0.351907	-0.574464	-1.20916	-1.03711	-1.27625	-1.48912	-2.86913	-0.52016	-2.63053	-5.20084	0.00562084	0.604805	0.01074	2.36604e-06	2.2502	0.218385	1.969	5.62598	0.0122434	0.712896	0.021974
ADA	692	0.290822	0.185653	0.476475	0.425838	0.610361	0.389639	0.633289	102.445	106.445	106.648	106.604	0.910351	4	62	0.463607	7.09948	7.12397	6.99055	6.87118	7.17616	0.387679	0.588774	-0.506783	-1.48702	1.01735	-0.0766791	-0.0521904	-0.185604	-0.304974	-1.05459	-1.03684	-1.13729	-1.2354	-0.502746	-0.318685	-0.866725	-1.72691	0.616924	0.751037	0.389435	0.0891628	0.209768	0.124339	0.409565	1.04982	0.722207	0.81707	0.509324
RORC	693	0	0.321473	0.321473	0.330627	0	1	0.0866142	118.185	120.185	120.252	120.265	1.46983	4	62	0.22219	4.67236	4.83066	5.30638	4.7759	4.84869	-0.877381	-0.229704	1.71675	-0.453745	-0.155924	-0.176328	-0.0180323	0.457693	-0.0727891	-1.13	-1.01258	1.37334	-1.05175	-0.89246	-0.0869043	1.65435	-0.318628	0.375597	0.931028	0.103112	0.751079	0.425278	0.0310374	0.986692	0.124314	0.49501	0.948896	0.164031
MAPK8	694	0.030069	0.284093	0.314162	0.46317	0.0957119	0.904288	0.453797	114.855	118.855	119.058	119.014	10.4273	4	62	1.59614e-06	5.47273	6.3287	5.62266	5.45154	6.36129	-0.815959	1.04824	-0.489414	-0.862094	1.11922	-0.888566	-0.0325924	-0.738628	-0.909749	-1.85133	-1.02285	-1.66859	-1.87872	-4.7456	-0.163903	-2.81505	-4.19997	1.26597e-05	0.870341	0.00652895	8.69227e-05	4.89758	0.0603107	2.18516	4.06087	4.24285e-05	0.901362	0.0140231
CCR10	695	0.072454	0.618566	0.69102	1.14582	0.104851	0.895149	0.520708	163.433	167.433	167.637	167.592	13.4696	4	62	5.86103e-08	4.64518	4.7823	6.7937	6.06553	4.8756	-0.829141	-0.684726	1.4336	0.666727	-0.586462	-0.230429	-0.0933043	1.91809	1.18993	-1.17318	-1.06681	3.77923	2.28141	-0.833662	-0.31766	4.95165	3.72118	0.407672	0.751811	5.96687e-06	0.000429418	0.389689	0.123892	5.22425	3.36712	0.528241	0.81707	2.13449e-05
LIMK1	696	0.0124542	0.615901	0.628355	0.922379	0.0198203	0.98018	0.382713	159.559	163.559	163.763	163.718	8.9221	4	62	9.32832e-06	4.57601	4.78118	5.87724	6.08408	4.85504	-0.951242	-0.654962	0.927898	1.2266	-0.548293	-0.279026	-0.073864	1.0222	1.22904	-1.21338	-1.05253	2.03102	2.34411	-1.01773	-0.255653	2.66234	3.87662	0.312762	0.799065	0.00987152	0.000258395	0.504786	0.0974178	2.00562	3.58772	0.42662	0.849248	0.0205434
B3GAT1	697	0.0776148	0.67318	0.750795	1.2519	0.103377	0.896623	0.522367	168.626	172.626	172.829	172.784	13.5887	4	62	5.18351e-08	4.69293	4.7744	7.03148	6.02288	4.87552	-0.768971	-0.689318	1.51743	0.531319	-0.590457	-0.182587	-0.101116	2.15597	1.14736	-1.13492	-1.0726	4.45667	2.21509	-0.633255	-0.330049	5.33561	3.4397	0.528896	0.742475	1.42568e-06	0.00104693	0.27663	0.129318	5.84598	2.98008	0.651079	0.813527	5.84783e-06
FLT1	698	0.00135677	0.109362	0.110719	0.122065	0.0122542	0.987746	0.167057	52.0051	56.0051	56.2085	56.164	2.76124	4	62	0.035299	4.57962	4.78132	4.96595	4.59769	4.84821	-1.05787	0.161824	1.27834	-0.948605	0.566315	-0.268584	-0.0668888	0.117744	-0.250515	-1.20463	-1.04746	1.08504	-1.18963	-2.32687	-0.550552	0.728436	-1.87692	0.0232538	0.583919	0.469089	0.0652366	1.63351	0.233647	0.328744	1.18551	0.0444027	0.699522	0.594321
LY96	699	0.0738687	0.648488	0.722356	1.75149	0.102261	0.897739	0.671009	166.268	170.268	170.471	170.427	28.4896	4	62	1.90647e-13	9.00775	7.60055	8.99129	10.1486	7.13847	0.355913	-0.807701	0.342297	1.29929	-1.1898	1.86928	0.462085	1.85282	3.01014	3.65351	1.37753	3.61205	8.05643	6.60574	1.53691	4.67213	9.19484	1.02992e-08	0.129405	1.65036e-05	3.44843e-13	7.9872	0.88805	4.78242	12.4624	6.39548e-08	0.199184	5.43649e-05
CISH	700	0	0.406737	0.406737	1.20706	0	1	0.683458	132.771	134.771	134.838	134.85	33.4666	4	62	7.23575e-15	5.1933	4.77965	7.31914	6.79713	4.84869	-0.501566	-0.850685	1.29262	0.85205	-0.792415	0.344612	-0.0690421	2.47045	1.94844	1.26981	-1.04902	5.54216	3.85958	1.55065	-0.295815	7.9386	7.58266	0.126076	0.76836	5.05748e-11	2.09853e-10	0.899366	0.114435	10.2961	9.67808	0.19533	0.830077	5.29832e-10
PRF1	701	0.205538	0.210201	0.41574	0.49041	0.494392	0.505608	0.637686	107.149	111.149	111.352	111.308	9.52492	4	62	4.54893e-06	7.97503	8.51095	7.78151	7.56359	8.43289	-0.189548	1.11668	-0.661197	-1.19234	0.926413	-0.457866	0.0780626	-0.651378	-0.869301	-1.37351	1.0556	-1.57067	-1.82678	-2.82301	0.448656	-2.86102	-4.62935	0.00638727	0.655244	0.00574915	1.92445e-05	2.19468	0.183597	2.2404	4.71569	0.0137476	0.751233	0.0124876
IFI44	702	0.106239	1.94712	2.05336	9.70886	0.0517391	0.948261	0.818119	232.423	236.423	236.626	236.582	66.3493	4	62	1.03264e-21	12.0788	7.57249	12.287	13.2634	6.26185	0.567371	-0.86411	0.633508	0.943678	-1.28045	5.81696	1.31064	6.02516	7.00158	56.3743	2.48051	65.1261	128.141	11.8982	2.53369	8.79791	12.3823	1.18604e-17	0.0138286	1.65253e-12	2.05828e-18	16.9259	1.85922	11.7818	17.6865	1.52209e-15	0.0277293	2.45884e-11
IL1RL2	703	0.000474172	0.0825012	0.0829754	0.109029	0.00571461	0.994285	0.292745	34.1782	38.1782	38.3816	38.337	6.21487	4	62	0.000285251	4.65756	4.78147	4.49276	4.33589	4.8479	0.164097	0.754314	-0.620968	-1.3682	1.07075	-0.190333	-0.0664298	-0.355141	-0.512006	-1.14103	-1.04712	-1.27911	-1.42603	-1.90009	-0.630773	-2.53184	-4.4205	0.0620737	0.530507	0.0138949	4.03939e-05	1.20709	0.275309	1.85715	4.39368	0.105727	0.652593	0.0278259
RELA	704	0	0.451091	0.451091	1.1297	0	1	0.624897	139.188	141.188	141.255	141.268	25.822	4	62	1.28139e-12	5.16501	4.83194	7.24574	6.59621	4.84869	-0.514649	-0.81406	1.3558	0.77191	-0.799001	0.31632	-0.0167517	2.39705	1.74752	1.24515	-1.01168	5.26724	3.3578	1.35155	-0.0681537	7.31424	6.45772	0.181429	0.945883	6.13595e-10	1.84904e-08	0.741294	0.0241628	9.21212	7.73305	0.268654	0.959907	5.02626e-09
PLCB1	705	0.0552889	0.231366	0.286655	0.547739	0.192876	0.807124	0.632693	105.326	109.326	109.53	109.485	21.9234	4	62	2.60154e-11	5.29303	5.73537	4.40053	4.29794	5.68197	0.305684	0.945728	-0.98571	-1.13416	0.868457	-0.38894	0.0534029	-1.28144	-1.38403	-1.30943	1.03771	-2.43081	-2.60997	-2.29421	0.295218	-5.39032	-7.05462	0.0251785	0.768814	1.15933e-06	1.72955e-09	1.59897	0.114179	5.93579	8.76207	0.0476057	0.830116	4.8714e-06
C10orf54	706	0.0333119	0.210221	0.243533	0.315091	0.136786	0.863214	0.412972	97.6284	101.628	101.832	101.787	7.75594	4	62	3.91104e-05	10.2518	9.911	9.96525	10.0502	9.36832	1.04105	0.00514739	0.170044	0.428141	-1.64438	0.883484	0.542681	0.596931	0.681843	1.84482	1.45668	1.5125	1.60419	5.47595	3.15961	2.63941	3.65256	8.37702e-07	0.00244267	0.0104908	0.000535481	6.07691	2.61213	1.97919	3.27126	3.60352e-06	0.00575186	0.0217295
BCL10	707	0.00663042	0.128524	0.135154	0.195863	0.0490582	0.950942	0.404078	63.7893	67.7893	67.9927	67.9482	8.97051	4	62	8.80055e-06	7.59328	7.39746	7.0874	7.89288	7.15165	0.510724	-0.0819454	-1.02035	1.41747	-0.825899	0.441636	0.245811	-0.0642489	0.741235	1.35814	1.18576	-1.04554	1.67161	3.51676	1.8505	-0.365242	5.10341	0.000823388	0.069007	0.716174	3.40339e-06	3.0844	1.16111	0.144981	5.46809	0.00209244	0.1157	0.79403
CHIT1	708	0.00744936	0.3745	0.381949	1.21177	0.0195035	0.980496	0.714231	128.698	132.698	132.902	132.857	37.76	4	62	5.53573e-16	4.966	4.85138	7.24212	6.86535	4.84791	-0.660213	-0.75618	1.24546	0.930015	-0.759084	0.11809	0.00346862	2.39421	2.01744	1.0853	1.00241	5.2569	4.04866	0.552388	0.0153971	7.99714	8.16082	0.582668	0.987765	4.0027e-11	2.08228e-11	0.234579	0.00534645	10.3976	10.6815	0.698551	0.989693	4.29558e-10
MUC1	709	2.72695e-05	0.193386	0.193413	0.197864	0.000140991	0.999859	0.0819876	86.6832	90.6832	90.8866	90.8421	1.38014	4	62	0.251169	4.64721	4.77966	4.96934	4.5513	4.84869	-0.680692	0.124082	1.27656	-1.26344	0.543487	-0.201477	-0.0690264	0.120651	-0.297387	-1.14988	-1.04901	1.08723	-1.22892	-1.31475	-0.428889	0.562254	-1.67838	0.193435	0.66949	0.57597	0.098307	0.713465	0.174256	0.2396	1.00742	0.283705	0.76315	0.692758
BAD	710	0.00146599	0.0714286	0.0728946	0.0981227	0.020111	0.979889	0.327181	26.002	30.002	30.2054	30.1609	6.93566	4	62	0.000111121	4.57809	4.78279	4.61422	4.34124	4.8482	-0.276482	0.755963	-0.0942609	-1.47108	1.08586	-0.270111	-0.0654092	-0.233982	-0.506963	-1.2059	-1.04638	-1.17608	-1.42106	-2.89291	-0.664726	-1.78942	-4.69535	0.0052598	0.508691	0.0784307	1.51798e-05	2.27903	0.293546	1.10551	4.81873	0.0116381	0.630998	0.129596
FUT5	711	0.107012	0.672847	0.779859	1.50855	0.13722	0.86278	0.6076	169.771	173.771	173.974	173.93	19.2538	4	62	2.44709e-10	4.66353	4.7892	7.29625	6.42862	4.87982	-0.800008	-0.693954	1.42182	0.689609	-0.617471	-0.216293	-0.0906267	2.41642	1.5488	-1.16174	-1.06483	5.33846	2.92574	-0.749337	-0.294924	5.97212	4.63747	0.456488	0.769037	1.24079e-07	1.8692e-05	0.34057	0.114053	6.9063	4.72835	0.580266	0.830116	6.13423e-07
CXCL9	712	0.00569737	0.126687	0.132384	0.139889	0.0430367	0.956963	0.174899	62.6271	66.6271	66.8305	66.786	2.18595	4	62	0.0808884	4.57221	4.78322	4.49376	4.80216	4.85235	-0.815181	0.523133	-1.31279	0.643264	0.96157	-0.280136	-0.0691272	-0.358592	-0.0501865	-1.21431	-1.04908	-1.28217	-1.0354	-2.24793	-0.524763	-2.05434	-0.34821	0.028147	0.60162	0.0441644	0.728862	1.55057	0.220678	1.35493	0.137355	0.0526368	0.712896	0.0784918
MEF2C	713	0.0239258	0.211047	0.234973	0.435545	0.101824	0.898176	0.569377	96.6531	100.653	100.856	100.812	17.7429	4	62	9.37097e-10	5.47163	5.96027	4.86455	4.67249	5.866	0.180346	1.02247	-0.865907	-1.19692	0.860007	-0.394366	0.0942698	-1.00144	-1.19351	-1.31437	1.06752	-2.002	-2.28708	-2.44296	0.549642	-4.4267	-6.39078	0.0174297	0.584539	3.95225e-05	2.4077e-08	1.75871	0.233186	4.40316	7.6184	0.0341063	0.699992	0.000123208
CD96	714	0.2731	0.225993	0.499093	1.03814	0.547193	0.452807	0.816438	112.97	116.97	117.173	117.129	40.6001	4	62	1.12792e-16	5.88331	6.78624	4.73696	5.09265	6.82967	0.0183717	0.963782	-1.18192	-0.809487	1.00925	-0.946356	-0.0434264	-2.09271	-1.73702	-1.927	-1.03056	-4.26549	-3.33345	-5.62556	-0.240527	-8.86114	-8.91808	4.73142e-07	0.810716	1.2866e-12	1.02718e-12	6.32501	0.0911315	11.8906	11.9884	2.15574e-06	0.857193	2.01954e-11
SMPD3	715	0.0537196	0.552737	0.606456	0.869388	0.0885795	0.91142	0.432422	155.852	159.852	160.055	160.011	9.14486	4	62	7.14133e-06	4.72734	4.76912	6.5393	5.60493	4.87059	-0.738685	-0.685006	1.58942	0.388888	-0.554622	-0.143256	-0.101477	1.66871	0.734333	-1.10439	-1.07287	3.1793	1.66363	-0.548707	-0.366171	4.56135	2.43141	0.585177	0.715484	2.4538e-05	0.0179439	0.232713	0.1454	4.61016	1.74608	0.700484	0.793551	7.8808e-05
CXCR4	716	0.013402	0.220925	0.234327	0.361854	0.0571936	0.942806	0.447788	97.7289	101.729	101.932	101.888	10.1921	4	62	2.09072e-06	8.94654	9.36673	8.51614	8.24768	8.93283	0.334742	1.30779	-0.661925	-1.28362	0.303011	0.0137028	0.433896	-0.41669	-0.685157	1.00954	1.35088	-1.33486	-1.60788	0.0831757	2.48782	-1.80553	-3.5957	0.93398	0.0155555	0.075847	0.000641877	0.0296625	1.80812	1.12006	3.19255	0.950647	0.0307911	0.125799
ZEB1	717	0.0166687	0.188376	0.205044	0.22633	0.081293	0.918707	0.254949	88.8312	92.8312	93.0346	92.99	3.00642	4	62	0.0247766	6.37939	6.14153	6.2726	6.48283	5.95903	0.645926	-0.51523	0.124594	1.15087	-1.40616	0.420363	0.182504	0.31357	0.5238	1.33826	1.13485	1.24278	1.43774	2.75911	1.12913	1.46889	2.97208	0.0076091	0.263193	0.146917	0.00420646	2.11867	0.579725	0.832927	2.37608	0.0161464	0.370178	0.222909
MSR1	718	0.0072277	0.0842483	0.091476	0.108374	0.079012	0.920988	0.303495	38.8522	42.8522	43.0556	43.0111	4.66855	4	62	0.00233292	4.59012	4.79752	4.71689	4.40173	4.83969	-0.446218	0.724215	0.269187	-1.50936	0.962174	-0.249573	-0.0421674	-0.1228	-0.437966	-1.18886	-1.02966	-1.08885	-1.35469	-2.44979	-0.390223	-0.860303	-3.71645	0.0171317	0.697709	0.392937	0.000436028	1.7662	0.156326	0.405678	3.36049	0.0335861	0.783366	0.512598
LILRA4	719	0.00638756	0.348364	0.354751	0.75596	0.0180057	0.981994	0.573432	124.137	128.137	128.34	128.296	20.0632	4	62	1.21943e-10	4.7336	4.83504	6.35414	6.25173	4.8813	-0.829708	-0.705492	1.15472	1.02932	-0.648838	-0.147703	-0.0462654	1.47283	1.37043	-1.1078	-1.03259	2.77567	2.58547	-0.716479	-0.213021	5.10168	5.74876	0.476386	0.83201	3.42533e-06	2.94669e-07	0.322041	0.0798716	5.4653	6.53067	0.600601	0.871926	1.2757e-05
CYSLTR1	720	0	0.320037	0.320037	0.460319	0	1	0.346887	117.908	119.908	119.974	119.987	8.23249	4	62	2.16175e-05	7.96689	7.04296	7.43753	7.85641	7.17995	1.15725	-1.11699	-0.145757	0.885308	-0.779806	0.786938	-0.136983	0.257586	0.676462	1.72541	-1.0996	1.19548	1.59822	3.9919	-0.661654	0.933141	2.96779	0.00017609	0.510645	0.354367	0.00425808	3.75427	0.291881	0.450547	2.37079	0.000501254	0.632912	0.470859
PRG2	721	0.0381039	0.648215	0.686319	0.966039	0.0555192	0.944481	0.392604	164.394	168.394	168.597	168.553	8.3708	4	62	1.82343e-05	4.84462	4.79097	6.5111	5.86619	4.85635	-0.679929	-0.748851	1.46109	0.632542	-0.66485	-0.011737	-0.0653832	1.65475	1.00984	-1.00817	-1.04636	3.14868	2.01369	-0.0415966	-0.21892	4.18644	3.09431	0.966954	0.827431	9.10537e-05	0.00295823	0.0145942	0.0822682	4.0407	2.52897	0.973592	0.869198	0.000269659
HLA-DPB1	722	0.223533	0.533607	0.75714	1.27817	0.295234	0.704766	0.641983	159.955	163.955	164.158	164.114	19.4803	4	62	2.01074e-10	8.09888	8.83147	7.41481	6.7299	8.98382	0.0915154	0.861176	-0.627179	-1.34675	1.02123	-0.884934	-0.152349	-1.56901	-2.25391	-1.84668	-1.11138	-2.96701	-4.76975	-3.43084	-0.552075	-4.33583	-7.54931	0.00107604	0.582882	5.43262e-05	2.39783e-10	2.96817	0.23442	4.26499	9.62018	0.00267922	0.698551	0.000165668
CX3CR1	723	0.451414	0.273875	0.725289	0.788822	0.622392	0.377608	0.708088	126.881	130.881	131.084	131.04	12.5005	4	62	1.62012e-07	8.85374	8.61444	7.65345	7.74438	8.74184	0.92459	0.508835	-1.1608	-1.0028	0.730175	0.1119	-0.127398	-1.0884	-0.997459	1.08065	-1.09232	-2.12637	-1.99648	0.604024	-0.6404	-4.18433	-4.64999	0.548031	0.524272	9.17157e-05	1.78707e-05	0.261195	0.280443	4.03756	4.74786	0.66906	0.647457	0.000271098
SLAMF1	724	0	0.544045	0.544045	0.592276	0	1	0.137104	150.805	152.805	152.871	152.884	2.46276	4	62	0.0543115	6.09415	6.30764	5.96472	6.85471	6.50381	-0.713857	-0.106331	-1.08216	1.45045	0.451899	-0.40966	-0.196169	-0.539087	0.350903	-1.32837	-1.14565	-1.45305	1.27536	-1.59384	-0.726734	-1.49784	1.18076	0.116057	0.470124	0.139248	0.242209	0.93533	0.327788	0.85621	0.615809	0.181911	0.595203	0.21274
BCL6	725	0.0958172	0.376619	0.472436	0.758016	0.202815	0.797185	0.568694	135.826	139.826	140.03	139.985	15.5074	4	62	7.62883e-09	9.21817	8.4684	9.05362	9.6269	7.91913	0.539169	-0.58087	0.29335	1.14975	-1.4014	1.29904	0.549271	1.13448	1.70777	2.46065	1.46335	2.1954	3.26655	6.00443	2.37859	3.7393	6.82094	1.09418e-07	0.020473	0.00040495	4.38516e-09	6.96091	1.68882	3.3926	8.35801	5.43563e-07	0.0395837	0.00109216
STAT5A	726	0.0362878	0.274812	0.3111	0.520097	0.116644	0.883356	0.532558	113.552	117.552	117.755	117.711	14.839	4	62	1.46801e-08	8.07245	7.3082	8.17097	8.08444	6.91312	0.640887	-0.709849	0.815008	0.662073	-1.40812	1.15933	0.395082	1.25785	1.17132	2.23354	1.31502	2.39139	2.25217	6.28952	2.01555	4.86884	5.4925	3.58635e-08	0.0481867	8.08466e-06	7.86555e-07	7.44535	1.31707	5.09234	6.10427	1.99824e-07	0.0849055	2.81047e-05
ETS1	727	0.0487121	0.201147	0.249859	0.732721	0.194958	0.805042	0.761374	96.7097	100.71	100.913	100.869	42.9674	4	62	3.17833e-17	9.44404	10.1331	8.42469	8.56226	10.459	0.0433072	0.800365	-1.07662	-0.925471	1.15842	-1.01496	-0.325897	-2.03431	-1.89673	-2.02085	-1.25344	-4.09626	-3.72369	-6.42056	-1.93197	-9.177	-10.3682	2.14102e-08	0.0579363	3.69913e-13	3.62199e-15	7.66938	1.23705	12.4319	14.4411	1.24422e-07	0.0993563	6.94715e-12
RAG2	728	0.000103398	0.0908315	0.0909349	0.106329	0.00113705	0.998863	0.198355	39.8874	43.8874	44.0907	44.0462	3.80317	4	62	0.00789818	4.58145	4.77972	4.65147	4.43966	4.84879	-0.486704	0.738398	-0.054067	-1.36282	1.1652	-0.267344	-0.069073	-0.197326	-0.409135	-1.20359	-1.04904	-1.14657	-1.32789	-2.54519	-0.626014	-1.34158	-3.36872	0.013424	0.533603	0.184625	0.0013027	1.87212	0.272781	0.733709	2.88516	0.0269882	0.655302	0.272862
KLRG1	729	0.332813	0.590294	0.923106	0.909266	0.360535	0.639465	0.446572	167.87	171.87	172.073	172.029	3.37426	4	62	0.0145891	5.63633	6.25311	5.3503	5.62554	6.30788	-0.468471	0.988625	-1.1442	-0.493974	1.11802	-0.671546	-0.0547703	-0.957574	-0.682341	-1.59278	-1.03869	-1.94204	-1.60474	-2.47346	-0.188346	-2.5134	-2.17104	0.0161346	0.851221	0.01457	0.0337644	1.79224	0.0699577	1.83654	1.47154	0.0317944	0.886629	0.0290456
TLR7	730	0.00101974	0.0911943	0.0922141	0.120417	0.0110584	0.988942	0.295258	40.6782	44.6782	44.8816	44.837	6.13588	4	62	0.000316755	4.64246	4.80106	4.49387	4.321	4.84719	0.0978924	0.825195	-0.583534	-1.37628	1.03673	-0.204723	-0.0461273	-0.353316	-0.526183	-1.15247	-1.03249	-1.27749	-1.44011	-1.94255	-0.415915	-2.39404	-4.31782	0.0566155	0.678908	0.0197021	5.78411e-05	1.24706	0.168189	1.70549	4.23776	0.0975255	0.768481	0.0381652
IL2RB	731	0.130123	0.4548	0.584923	0.668033	0.222461	0.777539	0.410823	148.084	152.084	152.287	152.243	5.46022	4	62	0.000785036	6.31314	6.97266	6.69541	6.16381	7.16461	-0.822008	0.732323	0.0789218	-1.17397	1.18473	-0.851469	-0.191958	-0.4692	-1.00081	-1.80434	-1.14231	-1.38434	-2.00112	-3.57997	-0.755688	-1.40659	-3.63585	0.00067469	0.452698	0.164543	0.000564866	3.1709	0.344192	0.78372	3.24805	0.00173895	0.576876	0.246855
MR1	732	0.00999474	1.12823	1.13823	2.79572	0.00878098	0.991219	0.623772	196.512	200.512	200.715	200.671	25.3518	4	62	1.81517e-12	7.0984	4.97071	7.33658	8.15598	4.84946	0.413975	-1.01551	0.574	1.12451	-1.09697	2.24894	0.121247	2.48712	3.30652	4.75332	1.08767	5.60659	9.89377	6.06866	0.311026	4.79272	7.71641	8.5182e-08	0.756824	1.06706e-05	1.22929e-10	7.06965	0.121005	4.97181	9.91035	4.3873e-07	0.820203	3.61973e-05
TWIST2	733	0.0429105	1.22593	1.26884	2.93092	0.0338187	0.966181	0.616875	202.924	206.924	207.127	207.083	23.7937	4	62	5.91991e-12	7.22424	5.16026	7.78557	8.19383	4.86408	0.377239	-0.968341	0.743185	1.00934	-1.16143	2.36016	0.296174	2.92149	3.32975	5.13427	1.22788	7.57626	10.0543	6.09309	0.724149	5.38508	7.43311	7.74303e-08	0.471698	1.18256e-06	3.81575e-10	7.11109	0.326336	5.92718	9.41842	4.04212e-07	0.596644	4.96223e-06
IFNA4	734	0.0260333	0.490654	0.516688	0.679166	0.0503849	0.949615	0.344367	146.905	150.905	151.108	151.064	6.51279	4	62	0.000192642	4.68911	4.7788	6.29106	5.06592	4.86135	-0.679108	-0.5432	1.7485	-0.108093	-0.418099	-0.172236	-0.0825518	1.42971	0.204569	-1.1268	-1.05889	2.69392	1.15234	-0.701879	-0.31799	4.15926	0.720774	0.485381	0.751561	9.9934e-05	0.473757	0.313917	0.124036	4.00029	0.324444	0.609199	0.81707	0.00029314
GNAS	735	0.00365264	0.0976466	0.101299	0.123684	0.0360579	0.963942	0.277834	46.163	50.163	50.3664	50.3219	4.80344	4	62	0.00193412	9.18666	9.25954	8.66501	9.06254	9.26227	0.398549	0.690582	-1.69184	-0.0988399	0.701548	-0.0756128	-0.00273658	-0.597265	-0.199735	-1.05381	-1.0019	-1.51285	-1.14849	-0.691524	-0.0236964	-3.89999	-1.57952	0.491818	0.981171	0.000239183	0.119307	0.308196	0.00825534	3.62127	0.923336	0.614273	0.983726	0.000669105
JUN	736	0.0388065	0.318651	0.357458	0.680616	0.108563	0.891437	0.584818	122.442	126.442	126.646	126.601	18.4148	4	62	5.1217e-10	7.02777	6.8591	8.23453	7.94717	6.37937	-0.337463	-0.554871	1.21796	0.847576	-1.17321	0.648403	0.479729	1.85517	1.5678	1.56743	1.39448	3.61793	2.96453	3.26785	2.27468	6.67137	6.82981	0.00176927	0.0263956	7.94092e-09	4.23313e-09	2.75221	1.57847	8.10013	8.37334	0.00425067	0.049663	5.05331e-08
KLRK1	737	0.153977	0.487257	0.641234	1.96977	0.240126	0.759874	0.786463	152.85	156.85	157.054	157.009	48.7022	4	62	1.8017e-18	7.1617	8.21339	5.20646	5.43283	8.47717	0.172723	0.862388	-1.10947	-0.961015	1.03537	-1.31547	-0.263783	-3.27071	-3.04434	-2.48884	-1.20062	-9.65124	-8.24968	-5.34168	-1.00244	-9.46889	-10.6811	1.39337e-06	0.320027	1.17679e-13	1.09968e-15	5.85593	0.494813	12.9293	14.9587	5.75279e-06	0.434895	2.62646e-12
CD34	738	0.00901966	0.225333	0.234353	0.283614	0.0384875	0.961512	0.274274	98.1221	102.122	102.326	102.281	4.73174	4	62	0.00213656	4.57239	4.78127	5.2666	5.23531	4.85504	-1.23006	-0.535126	1.0795	0.97538	-0.289697	-0.282658	-0.0737723	0.41156	0.380264	-1.21643	-1.05247	1.33012	1.30158	-1.70136	-0.420301	1.76865	1.97911	0.093886	0.675718	0.0818707	0.0522486	1.0274	0.170234	1.08687	1.28193	0.151239	0.767126	0.134415
MAPK11	739	0.03629	0.402558	0.438848	0.595246	0.0826938	0.917306	0.394935	135.969	139.969	140.172	140.128	7.74973	4	62	3.94161e-05	4.56344	4.78219	5.81254	5.59813	4.86904	-1.02755	-0.627331	1.25779	0.865517	-0.468429	-0.305599	-0.0868511	0.943499	0.729092	-1.23593	-1.06205	1.92319	1.6576	-1.37202	-0.367505	3.02313	2.8297	0.175002	0.714494	0.00363509	0.00627053	0.756957	0.146002	2.43948	2.2027	0.26039	0.793536	0.00826279
CCR1	740	0.230068	0.396836	0.626905	1.00238	0.366991	0.633009	0.662686	143.41	147.41	147.614	147.569	20.188	4	62	1.09678e-10	7.73733	6.92418	8.06273	8.40559	6.41871	0.277398	-0.713564	0.673945	1.09177	-1.32955	1.31862	0.505464	1.64402	1.98688	2.49428	1.41958	3.12535	3.96378	5.9231	2.11962	5.26244	7.70963	1.50115e-07	0.0380486	1.87801e-06	1.26304e-10	6.82357	1.41966	5.7263	9.89858	7.33897e-07	0.0686928	7.48287e-06
MYC	741	0.179989	0.258391	0.43838	0.670912	0.410578	0.589422	0.672872	117.884	121.884	122.087	122.043	17.4209	4	62	1.25696e-09	6.7739	7.18518	5.62689	6.06981	7.20287	0.288801	0.87632	-1.34971	-0.716997	0.901586	-0.428969	-0.0176873	-1.57598	-1.13306	-1.34627	-1.01234	-2.98138	-2.19324	-2.38697	-0.0918264	-6.24842	-5.4461	0.0200517	0.927132	4.21465e-08	9.38325e-07	1.69785	0.0328584	7.37524	6.02765	0.0387934	0.94712	2.32636e-07
IFNGR1	742	0.0697162	0.306197	0.375914	0.502266	0.185458	0.814542	0.469178	122.479	126.479	126.683	126.638	9.48342	4	62	4.77719e-06	10.5996	10.0312	10.6133	10.7858	9.65539	0.552093	-0.643134	0.580783	0.943476	-1.43322	0.944247	0.375777	0.957892	1.13039	1.92418	1.29754	1.94247	2.18919	4.84243	1.80654	3.50332	5.00949	8.90357e-06	0.0756875	0.00085881	4.82083e-06	5.05044	1.12098	3.0661	5.31688	3.07778e-05	0.125602	0.00217886
ITGB2	743	0	0.127592	0.127592	0.358011	0	1	0.665209	60.8924	62.8924	62.959	62.9718	30.7975	4	62	4.00752e-14	10.053	10.0109	10.8226	11.0433	9.62807	-0.433805	-0.504453	0.857356	1.22768	-1.14677	0.424945	0.382837	1.1945	1.41522	1.34252	1.3039	2.28866	2.66701	3.41398	2.92864	6.85332	9.83341	0.00113354	0.0047573	3.85533e-09	2.844e-14	2.94556	2.32264	8.41394	13.5461	0.00281103	0.0106331	2.59267e-08
IL2RG	744	0.0228752	0.211163	0.234038	0.420947	0.0977413	0.902259	0.553597	96.5368	100.537	100.74	100.696	15.7139	4	62	6.24858e-09	7.76135	7.81555	8.82456	8.86823	7.99144	-0.893727	-0.795049	1.04203	1.12155	-0.474808	-0.230089	-0.17589	0.833117	0.876791	-1.17291	-1.12966	1.78153	1.83629	-1.4252	-1.02573	3.68246	4.69457	0.159115	0.309006	0.000486496	1.52226e-05	0.79829	0.510033	3.31292	4.81751	0.23906	0.422619	0.00128951
MYD88	745	0.133223	0.435624	0.568847	1.22874	0.234199	0.765801	0.693709	145.742	149.742	149.945	149.901	29.4424	4	62	9.91953e-14	9.2291	8.13436	9.69223	10.1804	7.71564	0.229658	-0.823346	0.675135	1.14465	-1.2261	1.51345	0.418715	1.97658	2.46471	2.85492	1.33674	3.9356	5.52016	6.50033	1.68333	6.05277	9.14673	1.56268e-08	0.0973411	9.0628e-08	4.1673e-13	7.80613	1.0117	7.04274	12.3801	9.3822e-08	0.156396	4.62909e-07
ATG10	746	0.0121214	0.238344	0.250465	0.275321	0.0483956	0.951604	0.213549	102.051	106.051	106.255	106.21	2.81837	4	62	0.0325036	5.51017	5.59368	5.15001	5.46633	5.8934	-0.0470588	0.266001	-1.39705	-0.211355	1.38946	-0.383239	-0.29972	-0.743394	-0.427071	-1.30427	-1.23091	-1.67411	-1.3445	-2.2411	-1.6571	-3.10347	-2.15932	0.0286101	0.102552	0.00288022	0.0347019	1.54348	0.989055	2.54057	1.45965	0.0534704	0.163235	0.00670022
ALOX5	747	0.236322	0.63164	0.867962	2.6831	0.272272	0.727728	0.797604	169.809	173.809	174.013	173.968	52.7091	4	62	2.80762e-19	6.96775	5.97687	8.77782	9.20917	5.14301	-0.140917	-0.705838	0.891034	1.13696	-1.18124	1.82474	0.833859	3.6348	4.06616	3.54243	1.78245	12.4218	16.7508	6.50444	2.77959	9.23608	12.5225	1.53754e-08	0.00719587	2.93223e-13	1.24599e-18	7.81317	2.14292	12.5328	17.9045	9.24924e-08	0.0153485	5.716e-12
CD1B	748	0.0130899	0.132974	0.146064	0.194576	0.0896173	0.910383	0.390131	67.5584	71.5584	71.7618	71.7173	7.50451	4	62	5.36909e-05	4.61077	4.87606	4.76148	4.27023	5.0108	-0.334202	0.598121	0.195443	-1.531	1.07164	-0.400024	-0.134736	-0.249316	-0.740565	-1.31953	-1.09789	-1.18864	-1.67083	-3.12367	-0.991103	-1.38935	-4.99895	0.00271498	0.325487	0.169696	5.01226e-06	2.56623	0.487466	0.770327	5.29997	0.00634937	0.44066	0.253557
PTGER3	749	0.0709439	0.586396	0.65734	1.69776	0.107926	0.892074	0.693644	160.233	164.233	164.436	164.392	30.5133	4	62	4.83595e-14	4.66054	4.78915	7.33252	7.03137	4.86894	-0.81151	-0.714514	1.20374	0.976611	-0.654332	-0.208399	-0.0797946	2.46358	2.16243	-1.15541	-1.05687	5.51584	4.47668	-0.774262	-0.278925	6.53093	6.94439	0.441718	0.78123	1.38471e-08	2.68336e-09	0.354854	0.107221	7.85864	8.57132	0.565223	0.838922	8.37898e-08
LILRA1	750	2.41767	0.258207	2.67588	2.44517	0.903506	0.0964942	0.911854	134.971	138.971	139.174	139.13	9.18101	4	62	6.83975e-06	6.6923	6.21114	6.80533	6.88285	5.85262	0.461109	-0.629407	0.717294	0.892981	-1.44198	0.839681	0.358523	0.952715	1.03023	1.78965	1.28211	1.93551	2.04235	4.6638	1.85198	3.76762	4.94126	1.70055e-05	0.0687915	0.000369372	6.19921e-06	4.76941	1.16247	3.43254	5.20766	5.58986e-05	0.115402	0.00100059
CD5	751	0.110077	0.481159	0.591236	0.67394	0.18618	0.81382	0.378426	150.523	154.523	154.726	154.682	5.04563	4	62	0.00138399	5.43818	5.94605	6.2221	5.2961	6.27145	-0.886503	0.248734	0.865794	-1.20411	0.97609	-0.833262	-0.325395	-0.0493427	-0.975351	-1.78171	-1.25301	-1.03479	-1.96612	-3.40885	-1.24786	-0.143957	-3.44804	0.00115161	0.216775	0.886001	0.00102021	2.93869	0.66399	0.0525656	2.99131	0.00285356	0.313165	0.913407
HLA-DRB1	752	0.0964949	0.7258	0.822295	1.85824	0.117348	0.882652	0.654536	173.79	177.79	177.994	177.949	25.1888	4	62	2.04982e-12	10.1034	10.8258	7.87189	8.62671	11.0526	0.29256	0.811432	-1.31024	-0.768079	0.974327	-0.949185	-0.226789	-3.18068	-2.42585	-1.93078	-1.17023	-9.06732	-5.37347	-3.16853	-0.711882	-7.57549	-6.99931	0.00237919	0.479208	2.15955e-10	2.15607e-09	2.62357	0.319476	9.66564	8.66634	0.00561526	0.602925	1.91132e-09
KLRF1	753	0.125547	0.253015	0.378562	0.907075	0.331641	0.668359	0.761632	114.621	118.621	118.825	118.78	36.4641	4	62	1.17631e-15	5.2204	6.08066	4.4199	4.2448	6.22691	-0.0198333	0.921018	-0.89533	-1.08683	1.08098	-1.00651	-0.146256	-1.80701	-1.98211	-2.00905	-1.10669	-3.49917	-3.9507	-5.6643	-0.768816	-7.2475	-9.6363	4.07806e-07	0.444922	8.01047e-10	6.12077e-14	6.38955	0.351716	9.09634	13.2132	1.88312e-06	0.568614	6.27792e-09
TRIM39	754	0	0.185831	0.185831	0.236879	0	1	0.263048	84.2045	86.2045	86.2711	86.2839	5.53258	4	62	0.000711624	6.80256	6.66317	5.89849	6.80323	6.66772	0.619821	0.252983	-1.75934	0.621565	0.264969	0.134843	-0.00455443	-0.769229	0.135505	1.09797	-1.00316	-1.70436	1.09848	0.897651	-0.0288694	-3.65697	0.780167	0.372844	0.977061	0.000527973	0.438261	0.428472	0.0100781	3.27739	0.358267	0.491593	0.981523	0.00138751
HDAC3	755	0	0.0436152	0.0436152	0.0438054	0	1	0.0646851	-5.6603	-3.6603	-3.59363	-3.58086	1.07196	4	62	0.37807	6.62539	6.74377	6.77242	6.73497	6.70398	-1.61189	0.491496	1.00075	0.33513	-0.21548	-0.0785869	0.039787	0.0684464	0.0309871	-1.05598	1.02796	1.04859	1.02171	-1.07987	0.520578	0.671671	0.368259	0.284384	0.604515	0.504288	0.713935	0.546095	0.218593	0.297321	0.146341	0.395084	0.712896	0.626546
HPRT1	756	0.00844556	0.0611628	0.0696084	0.0953921	0.12133	0.87867	0.433536	20.5574	24.5574	24.7608	24.7163	7.97842	4	62	2.96171e-05	6.49315	6.43241	5.92028	6.34461	6.57141	0.551135	0.313361	-1.69167	-0.0303787	0.85755	-0.0782662	-0.139	-0.651136	-0.2268	-1.05575	-1.10114	-1.5704	-1.17024	-0.899864	-1.50244	-5.34129	-2.25384	0.371674	0.138059	1.39544e-06	0.0277513	0.429837	0.859936	5.85529	1.55672	0.49026	0.211238	5.75364e-06
ABCF1	757	0.00431809	0.0444671	0.0487852	0.085453	0.0885122	0.911488	0.535444	-0.398664	3.60134	3.80473	3.76022	14.7703	4	62	1.57138e-08	7.50181	7.4909	7.6797	8.02037	7.45565	-0.543984	-0.590392	0.212761	1.66197	-0.740351	0.0461606	0.0352512	0.224051	0.564721	1.03251	1.02474	1.16801	1.4791	0.623361	0.44847	2.15924	6.59234	0.535334	0.655378	0.0347085	1.08605e-08	0.271375	0.183508	1.45956	7.96415	0.656904	0.751233	0.0633884
POLR2A	758	0.0156843	0.119229	0.134913	0.152046	0.116255	0.883745	0.306205	61.7658	65.7658	65.9692	65.9247	3.71856	4	62	0.00891084	8.76289	8.75765	8.86731	9.07995	8.54717	-0.207117	-0.234178	0.332191	1.43041	-1.3213	0.215727	0.210488	0.320147	0.532783	1.16129	1.15708	1.24846	1.44672	1.77684	1.63034	1.8814	3.79297	0.0804995	0.108101	0.064614	0.000340074	1.09421	0.966171	1.18967	3.46843	0.132304	0.170832	0.109347
PPIA	759	0.0617723	0.167297	0.229069	0.318483	0.269667	0.730333	0.548239	87.3701	91.3701	91.5735	91.529	10.0985	4	62	2.329e-06	11.8095	11.6309	12.7035	12.1304	11.5956	-0.357891	-0.746584	1.58763	0.340324	-0.823483	0.213941	0.0353354	1.10792	0.534775	1.15985	1.0248	2.15535	1.44872	1.48188	0.228893	5.47051	3.20029	0.143438	0.819705	8.55197e-07	0.00216544	0.843336	0.0863422	6.06793	2.66445	0.218383	0.863438	3.67365e-06
G6PD	760	0.0358722	0.285671	0.321544	0.433092	0.111562	0.888438	0.415594	115.776	119.776	119.979	119.934	8.22478	4	62	2.18241e-05	6.69034	6.53045	6.57187	7.18234	5.9647	0.235567	-0.132259	-0.0369576	1.36744	-1.43379	0.725637	0.56575	0.607176	1.21764	1.65363	1.48016	1.52327	2.32566	3.86194	2.83229	2.30571	5.60143	0.000271221	0.00622584	0.0244853	5.18957e-07	3.56668	2.2058	1.61109	6.28487	0.000749202	0.0134603	0.0464828
ALAS1	761	0.00474075	0.268182	0.272923	0.37751	0.0173703	0.98263	0.342103	107.886	111.886	112.089	112.045	7.38838	4	62	6.22125e-05	7.14687	7.3203	7.40821	7.96447	6.87113	-0.483752	-0.0542264	0.163486	1.54117	-1.16667	0.275743	0.449172	0.537078	1.09334	1.21062	1.36526	1.45103	2.13368	1.52458	2.35751	2.12046	5.22769	0.132448	0.0215685	0.0379749	2.13964e-06	0.877955	1.66618	1.4205	5.66966	0.203664	0.0415194	0.0686401
OAZ1	762	0.210614	0.162104	0.372718	0.451233	0.565077	0.434923	0.6973	92.831	96.831	97.0344	96.9899	10.9137	4	62	9.1985e-07	15.4176	15.1836	14.2603	14.8398	14.9915	1.09752	0.561361	-1.55385	-0.226243	0.12121	0.426161	0.192127	-0.731165	-0.151664	1.34365	1.14245	-1.65998	-1.11085	2.99085	1.25617	-3.65504	-0.919292	0.00398733	0.213769	0.000531249	0.361506	2.39932	0.670056	3.2747	0.441885	0.00899705	0.309766	0.00139492
ERCC3	763	0	0.0512162	0.0512162	0.0535431	0	1	0.101432	4.29999	6.29999	6.36666	6.37943	1.74967	4	62	0.1505	6.65243	6.71144	6.71157	6.50969	6.7203	-0.0973593	0.566672	0.568072	-1.70373	0.666342	-0.0678659	-0.00885713	-0.00873276	-0.210615	-1.04817	-1.00616	-1.00607	-1.15718	-0.860573	-0.106943	-0.0790811	-2.30981	0.392789	0.915179	0.937223	0.0242423	0.405841	0.0384938	0.0281571	1.61543	0.512598	0.936463	0.952374
SDHA	764	0.00700379	0.0221157	0.0291195	0.0405228	0.240519	0.759481	0.528905	-38.8741	-34.8741	-34.6707	-34.7152	10.4128	4	62	1.6229e-06	7.20589	7.10048	7.1777	6.86812	7.01454	0.969467	0.19844	0.763264	-1.50106	-0.430106	0.191351	0.0859352	0.163158	-0.146422	1.14183	1.06138	1.11974	-1.10682	3.64714	1.53287	2.21713	-2.41132	0.00054485	0.130396	0.0302899	0.0188706	3.26372	0.884735	1.5187	1.72421	0.00142699	0.20061	0.0562427
PPBP	765	0.140987	0.318501	0.459488	0.609422	0.306835	0.693165	0.552335	128.26	132.26	132.464	132.419	8.45491	4	62	1.64479e-05	13.3445	13.4332	12.1585	13.5525	13.7278	0.162465	0.30467	-1.74075	0.496197	0.777414	-0.383231	-0.29461	-1.56929	-0.175252	-1.30426	-1.22655	-2.96759	-1.12916	-1.92281	-1.38133	-5.61203	-0.759649	0.0590998	0.172136	4.98304e-07	0.450343	1.22841	0.764128	6.30251	0.346456	0.101183	0.256497	2.25702e-06
DDX50	766	0.0104355	0.115244	0.125679	0.1636	0.0830328	0.916967	0.369842	58.4329	62.4329	62.6363	62.5918	6.72388	4	62	0.000146226	7.55968	7.65012	7.15164	7.17946	7.7517	0.366379	0.693931	-1.11143	-1.01069	1.06181	-0.192015	-0.101575	-0.600051	-0.572237	-1.14236	-1.07294	-1.51577	-1.48683	-1.61117	-0.803271	-3.59335	-4.15078	0.112223	0.424887	0.000646683	0.00010287	0.949919	0.371726	3.18931	3.98771	0.176801	0.547978	0.00167236
TBP	767	0.0377964	0.232684	0.270481	0.368236	0.139738	0.860262	0.444427	104.021	108.021	108.224	108.179	8.96784	4	62	8.82888e-06	5.33522	6.09187	5.30294	5.28142	5.96293	-0.652532	1.24897	-0.733647	-0.787731	0.924936	-0.627709	0.128942	-0.659986	-0.681508	-1.54511	1.09349	-1.58007	-1.60382	-3.69769	0.713399	-2.77345	-3.46969	0.000463237	0.478276	0.00731761	0.000953842	3.3342	0.320322	2.13563	3.02052	0.00123104	0.602491	0.0155892
TUBB	768	0.0746262	0.175828	0.250454	0.395389	0.297964	0.702036	0.618746	91.196	95.196	95.3993	95.3548	16.517	4	62	2.90904e-09	7.77897	8.19602	6.99155	7.25766	8.20581	0.169411	0.929341	-1.26541	-0.780523	0.94718	-0.426836	-0.00979017	-1.21426	-0.948154	-1.34428	-1.00681	-2.32021	-1.9294	-2.88271	-0.0617984	-5.84526	-5.5322	0.00541195	0.950922	2.02986e-07	6.76118e-07	2.26665	0.021855	6.69253	6.16998	0.0119575	0.962801	9.79933e-07
GUSB	769	0.00340724	0.0948134	0.0982207	0.405251	0.0346896	0.96531	0.785812	44.2732	48.2732	48.4766	48.4321	54.671	4	62	1.17482e-19	6.56595	6.62331	7.93399	7.85522	6.63354	-0.788233	-0.706993	1.14966	1.03807	-0.692498	-0.0675832	-0.0102326	1.30046	1.22168	-1.04796	-1.00712	2.46307	2.33218	-0.627333	-0.089946	8.61874	9.80568	0.532745	0.92862	3.36318e-12	3.16712e-14	0.273481	0.0321619	11.4732	13.4993	0.654509	0.948011	4.72996e-11
UBB	770	0.548768	0.512535	1.0613	1.54313	0.51707	0.48293	0.719552	162.976	166.976	167.179	167.135	19.9807	4	62	1.3083e-10	13.2313	12.9076	10.3146	12.9711	13.0211	0.607515	0.342502	-1.77999	0.394523	0.435448	0.210209	-0.113549	-2.70653	-0.0499966	1.15686	-1.08189	-6.52751	-1.03526	0.829893	-0.417793	-7.61162	-0.170482	0.409783	0.677542	1.86903e-10	0.865186	0.387446	0.169064	9.72838	0.0628903	0.530308	0.768481	1.69812e-09
[truncated: 7 more columns]
