# Supplementary material for: Transcriptomic Analysis Reveals Host miRNAs Correlated with Immune Gene Dysregulation during Fatal Disease Progression in the Ebola Virus Cynomolgus Macaque Disease Model
Source: Microorganisms. 2021 Mar 23;9(3):665. doi: 10.3390/microorganisms9030665 (PMC8005181; doi:10.3390/microorganisms9030665)
Supplement: Supplementary file 1 [file microorganisms-09-00665-s001.zip › Supplemental Table S8 - miRNA Expression analysis.xlsx]

## Sheet: zumbrun_mirna_data_thres__amr
miRNA	_Row	Variance_ID	Variance_Residual	SumVariance	SampleVariance	PropVar_ID	PropVar_Residual	RSquare	N2RLL	AIC	AICC	BIC	F_T3_ANNOVA	NDF_T3_ANNOVA	DDF_T3_ANNOVA	PrF_T3_ANNOVA	Lsmean ANNOVA Day0	Lsmean ANNOVA Day1	Lsmean ANNOVA Day2	Lsmean ANNOVA Day3	Lsmean ANNOVA Day4	Lsmean ANNOVA Day5	Lsmean ANNOVA Day6	Lsmean ANNOVA Day7	Lsmean ANNOVA Day8	Std Lsmean ANNOVA Day0	Std Lsmean ANNOVA Day1	Std Lsmean ANNOVA Day2	Std Lsmean ANNOVA Day3	Std Lsmean ANNOVA Day4	Std Lsmean ANNOVA Day5	Std Lsmean ANNOVA Day6	Std Lsmean ANNOVA Day7	Std Lsmean ANNOVA Day8	Diff of ANNOVA = (Day1)-(Day0)	Diff of ANNOVA = (Day2)-(Day0)	Diff of ANNOVA = (Day3)-(Day0)	Diff of ANNOVA = (Day4)-(Day0)	Diff of ANNOVA = (Day5)-(Day0)	Diff of ANNOVA = (Day6)-(Day0)	Diff of ANNOVA = (Day7)-(Day0)	Diff of ANNOVA = (Day8)-(Day0)	Exp2 Diff of ANNOVA = (Day1)-(Day0)	Exp2 Diff of ANNOVA = (Day2)-(Day0)	Exp2 Diff of ANNOVA = (Day3)-(Day0)	Exp2 Diff of ANNOVA = (Day4)-(Day0)	Exp2 Diff of ANNOVA = (Day5)-(Day0)	Exp2 Diff of ANNOVA = (Day6)-(Day0)	Exp2 Diff of ANNOVA = (Day7)-(Day0)
hsa-piR-000765-gb-DQ570956-Homo	1	0.109835	0.247034	0.356869	0.875256	0.307774	0.692226	0.77615	108.927	112.927	113.15	113.086	19.9151	8	57	6.07877e-14	3.89231	4.07523	4.14081	4.81465	5.35834	5.73318	5.52504	5.89984	6.45137	-1.32605	-1.12503	-1.05296	-0.312455	0.285023	0.696954	0.468215	0.880098	1.4862	0.18292	0.248502	0.922339	1.46603	1.84087	1.63273	2.00753	2.55906	1.13518	1.18797	1.89519	2.7626	3.58226	3.10098	4.02092
hsa-piR-000794-gb-DQ570992-Homo	2	0	0.217506	0.217506	0.199342	0	1	0.0431716	91.0871	93.0871	93.1598	93.1666	0.321476	8	57	0.954598	2.93786	3.07555	3.08582	3.0475	3.00641	2.82458	3.05306	3.1372	2.79955	-0.495337	0.669853	0.756813	0.432476	0.0847671	-1.454	0.479561	1.19165	-1.66578	0.137686	0.147961	0.109636	0.0685484	-0.113281	0.1152	0.199344	-0.138306	1.10014	1.108	1.07896	1.04866	-1.08169	1.08312	1.14818
hsa-piR-000805-gb-DQ571003-Homo	3	0.0647497	0.118817	0.183567	0.300877	0.35273	0.64727	0.688206	68.3394	72.3394	72.5617	72.4983	11.6073	8	57	1.2988e-09	4.68303	4.83439	4.81473	4.24149	4.47053	5.19432	5.66478	5.4715	5.45898	-0.608116	-0.299765	-0.339813	-1.50765	-1.04104	0.433508	1.39198	0.998202	0.972696	0.151355	0.131697	-0.441539	-0.2125	0.511282	0.981749	0.788463	0.775943	1.11061	1.09558	-1.35805	-1.15869	1.42532	1.97486	1.72723
hsa-piR-001042-gb-DQ571335-Homo	4	0.00774004	0.143108	0.150848	0.152579	0.0513103	0.94869	0.207928	69.739	73.739	73.9613	73.8979	1.17995	8	57	0.327155	3.03621	3.07555	3.22065	3.06468	3.15504	2.84177	3.27515	3.38913	2.79522	-0.304123	-0.100021	0.652921	-0.156384	0.312468	-1.31311	0.93572	1.52719	-1.55466	0.0393332	0.184435	0.0284713	0.118825	-0.194446	0.238934	0.352918	-0.240994	1.02764	1.13637	1.01993	1.08585	-1.14428	1.18012	1.27714
hsa-piR-001152-gb-DQ571500-Homo	5	0.0762975	0.276427	0.352724	0.412591	0.216309	0.783691	0.461963	112.887	116.887	117.109	117.045	3.66103	8	57	0.00166864	3.9507	3.91097	4.11272	4.0145	4.42597	3.97054	4.51008	5.18142	5.3589	-0.787575	-0.860159	-0.491552	-0.670997	0.0807864	-0.751319	0.234451	1.46105	1.78532	-0.0397273	0.16202	0.0638059	0.475275	0.0198437	0.55938	1.23073	1.40821	-1.02792	1.11885	1.04522	1.39018	1.01385	1.47364	2.34685
hsa-piR-001184-gb-DQ571550-Homo	6	0	0.217506	0.217506	0.199342	0	1	0.0431716	91.0871	93.0871	93.1598	93.1666	0.321476	8	57	0.954598	2.93786	3.07555	3.08582	3.0475	3.00641	2.82458	3.05306	3.1372	2.79955	-0.495337	0.669853	0.756813	0.432476	0.0847671	-1.454	0.479561	1.19165	-1.66578	0.137686	0.147961	0.109636	0.0685484	-0.113281	0.1152	0.199344	-0.138306	1.10014	1.108	1.07896	1.04866	-1.08169	1.08312	1.14818
hsa-piR-001311-gb-DQ571812-Homo	7	0.00306802	0.197029	0.200097	0.183276	0.0153327	0.984667	0.0700897	86.2731	90.2731	90.4953	90.432	0.332331	8	57	0.949988	2.97157	3.07555	3.08582	3.0475	3.00641	2.82458	3.05767	3.14762	2.79481	-0.248723	0.621701	0.707722	0.386886	0.0429304	-1.47923	0.472041	1.22509	-1.72842	0.103977	0.114252	0.0759267	0.0348394	-0.14699	0.0860989	0.176055	-0.176757	1.07473	1.08241	1.05404	1.02444	-1.10726	1.0615	1.12979
hsa-piR-001312-gb-DQ571813-Homo	8	0.0427867	0.103365	0.146152	0.144745	0.292756	0.707244	0.43266	58.8791	62.8791	63.1014	63.038	1.1819	8	57	0.326007	3.35729	3.22481	3.36613	3.531	3.57429	3.53804	3.32047	3.60432	3.43466	-0.627044	-1.64375	-0.559229	0.706048	1.03822	0.760037	-0.909636	1.26868	-0.0333362	-0.132484	0.00883686	0.173712	0.216997	0.180747	-0.0368238	0.247028	0.0773646	-1.09618	1.00614	1.12796	1.16231	1.13347	-1.02585	1.18676
hsa-piR-002158-gb-DQ572892-Homo	9	0.0135481	0.173103	0.186652	0.173311	0.072585	0.927415	0.165397	81.4694	85.4694	85.6916	85.6283	0.504904	8	57	0.847629	3.06504	3.07555	3.10301	3.0475	3.00641	2.82458	3.07177	3.26849	2.79918	0.251604	0.325107	0.517165	0.128949	-0.158382	-1.42995	0.298687	1.67439	-1.60757	0.0105107	0.0379743	-0.0175391	-0.0586264	-0.240456	0.00673277	0.203453	-0.265855	1.00731	1.02667	-1.01223	-1.04147	-1.18137	1.00468	1.15145
hsa-piR-003672-gb-DQ574991-Homo	10	0	0.209196	0.209196	0.192549	0	1	0.0472642	88.8666	90.8666	90.9394	90.9461	0.353463	8	57	0.940329	2.93786	3.07555	3.08582	3.08038	3.00641	2.82458	3.05306	3.1372	2.79955	-0.51636	0.626925	0.71225	0.667027	0.0528384	-1.457	0.440211	1.13891	-1.6648	0.137686	0.147961	0.142515	0.0685484	-0.113281	0.1152	0.199344	-0.138306	1.10014	1.108	1.10383	1.04866	-1.08169	1.08312	1.14818
hsa-piR-004153-gb-DQ575660-Homo	11	0	0.217506	0.217506	0.199342	0	1	0.0431716	91.0871	93.0871	93.1598	93.1666	0.321476	8	57	0.954598	2.93786	3.07555	3.08582	3.0475	3.00641	2.82458	3.05306	3.1372	2.79955	-0.495337	0.669853	0.756813	0.432476	0.0847671	-1.454	0.479561	1.19165	-1.66578	0.137686	0.147961	0.109636	0.0685484	-0.113281	0.1152	0.199344	-0.138306	1.10014	1.108	1.07896	1.04866	-1.08169	1.08312	1.14818
hsa-piR-004307-gb-DQ575881-Homo	12	0.199194	0.277343	0.476536	0.751859	0.418003	0.581997	0.710286	118.263	122.263	122.485	122.422	7.36793	8	57	1.11568e-06	4.87566	4.3789	4.47117	5.16508	5.03315	4.48156	3.65708	3.48865	3.54443	0.826495	0.0543056	0.19773	1.27638	1.0713	0.213878	-1.06772	-1.32953	-1.24283	-0.496766	-0.404498	0.289419	0.157485	-0.394109	-1.21859	-1.38702	-1.33124	-1.41105	-1.32363	1.22215	1.11534	-1.31413	-2.32719	-2.61538
hsa-piR-004308-gb-DQ575882-Homo	13	0.0132075	0.177924	0.191132	0.234001	0.0691016	0.930898	0.363631	82.8952	86.8952	87.1175	87.0541	2.96113	8	57	0.00767401	3.09327	3.12286	3.08582	3.58917	3.68211	2.92027	3.07972	3.16944	2.85743	-0.303389	-0.197178	-0.330134	1.47675	1.81037	-0.92441	-0.352034	-0.0299623	-1.15001	0.0295876	-0.00745066	0.495902	0.588841	-0.173001	-0.0135512	0.07617	-0.235847	1.02072	-1.00518	1.4102	1.50404	-1.1274	-1.00944	1.05422
hsa-piR-004309-gb-DQ575884-Homo	14	0	0.201687	0.201687	0.187078	0	1	0.0546004	86.783	88.783	88.8557	88.8624	0.411496	8	57	0.909357	2.93786	3.07555	3.08582	3.0475	3.12216	2.82458	3.05306	3.1372	2.79955	-0.569023	0.528372	0.610272	0.304806	0.89989	-1.47191	0.349152	1.01981	-1.67137	0.137686	0.147961	0.109636	0.184298	-0.113281	0.1152	0.199344	-0.138306	1.10014	1.108	1.07896	1.13626	-1.08169	1.08312	1.14818
hsa-piR-004506-gb-DQ576200-Homo	15	0	0.217506	0.217506	0.199342	0	1	0.0431716	91.0871	93.0871	93.1598	93.1666	0.321476	8	57	0.954598	2.93786	3.07555	3.08582	3.0475	3.00641	2.82458	3.05306	3.1372	2.79955	-0.495337	0.669853	0.756813	0.432476	0.0847671	-1.454	0.479561	1.19165	-1.66578	0.137686	0.147961	0.109636	0.0685484	-0.113281	0.1152	0.199344	-0.138306	1.10014	1.108	1.07896	1.04866	-1.08169	1.08312	1.14818
hsa-piR-004721-gb-DQ576479-Homo	16	0	0.191772	0.191772	0.173791	0	1	0.0323449	83.9099	85.9099	85.9826	85.9893	0.238161	8	57	0.981884	3.00922	3.07555	3.08582	3.0475	3.00641	3.07815	3.15688	3.26621	2.79955	-0.390732	0.136596	0.218293	-0.0864144	-0.41308	0.157301	0.783258	1.65246	-2.05768	0.0663263	0.0766019	0.0382764	-0.00281085	0.0689305	0.147662	0.256988	-0.209665	1.04705	1.05453	1.02689	-1.00195	1.04894	1.10777	1.19498
hsa-piR-004918-gb-DQ576766-Homo	17	0	0.217506	0.217506	0.199342	0	1	0.0431716	91.0871	93.0871	93.1598	93.1666	0.321476	8	57	0.954598	2.93786	3.07555	3.08582	3.0475	3.00641	2.82458	3.05306	3.1372	2.79955	-0.495337	0.669853	0.756813	0.432476	0.0847671	-1.454	0.479561	1.19165	-1.66578	0.137686	0.147961	0.109636	0.0685484	-0.113281	0.1152	0.199344	-0.138306	1.10014	1.108	1.07896	1.04866	-1.08169	1.08312	1.14818
hsa-piR-004987-gb-DQ576872-Homo	18	0.10226	0.106596	0.208856	0.190644	0.48962	0.51038	0.562857	65.5156	69.5156	69.7378	69.6745	1.14738	8	57	0.346788	4.1118	4.15872	4.08764	4.40657	4.26571	4.14625	4.13306	4.46064	4.46684	-0.877553	-0.576524	-1.03253	1.01361	0.109896	-0.656489	-0.741152	1.36046	1.40028	0.0469214	-0.0241561	0.294775	0.153913	0.0344573	0.0212609	0.348838	0.355045	1.03306	-1.01688	1.22669	1.11258	1.02417	1.01485	1.27353
hsa-piR-005076-gb-DQ577008-Homo	19	0	0.217506	0.217506	0.199342	0	1	0.0431716	91.0871	93.0871	93.1598	93.1666	0.321476	8	57	0.954598	2.93786	3.07555	3.08582	3.0475	3.00641	2.82458	3.05306	3.1372	2.79955	-0.495337	0.669853	0.756813	0.432476	0.0847671	-1.454	0.479561	1.19165	-1.66578	0.137686	0.147961	0.109636	0.0685484	-0.113281	0.1152	0.199344	-0.138306	1.10014	1.108	1.07896	1.04866	-1.08169	1.08312	1.14818
hsa-piR-005799-gb-DQ577967-Homo	20	0.00173394	0.215005	0.216739	0.199365	0.00800012	0.992	0.0613218	90.8659	94.8659	95.0881	95.0248	0.356975	8	57	0.938637	2.93859	3.10843	3.08582	3.0475	3.00641	2.82458	3.0556	3.14356	2.79665	-0.505766	0.875159	0.691371	0.379751	0.0456756	-1.43276	0.445609	1.16082	-1.65986	0.169837	0.147233	0.108908	0.0678207	-0.114009	0.117008	0.20497	-0.14194	1.12493	1.10744	1.07841	1.04813	-1.08223	1.08448	1.15266
hsa-piR-008112-gb-DQ581031-Homo	21	0.00983011	0.0415392	0.0513693	0.06788	0.191362	0.808638	0.506341	4.13341	8.13341	8.35563	8.29229	3.94317	8	57	0.000910809	12.2996	12.3153	12.376	12.4703	12.383	12.2539	12.0039	11.9513	12.2974	0.222155	0.312601	0.663094	1.20801	0.703699	-0.0422179	-1.48639	-1.78996	0.209008	0.0156572	0.0763317	0.170663	0.0833609	-0.045766	-0.295769	-0.34832	-0.00227592	1.01091	1.05433	1.12558	1.05948	-1.03223	-1.22754	-1.27308
hsa-piR-008113-gb-DQ581032-Homo	22	0	0.080936	0.080936	0.0889009	0	1	0.201643	34.7388	36.7388	36.8115	36.8183	1.79958	8	57	0.0960691	10.9836	10.9425	11.0474	11.147	11.1759	10.994	10.7976	10.6684	11.107	-0.00713193	-0.255997	0.378523	0.980655	1.15553	0.0557149	-1.13227	-1.91392	0.738902	-0.0411452	0.0637608	0.163312	0.192224	0.0103906	-0.186021	-0.315252	0.123343	-1.02893	1.04519	1.11986	1.14252	1.00723	-1.13762	-1.24423
hsa-piR-008114-gb-DQ581033-Homo	23	0.00892564	0.055024	0.0639497	0.0621793	0.139573	0.860427	0.277609	18.5512	22.5512	22.7734	22.7101	0.93241	8	57	0.497284	5.62075	5.59216	5.68914	5.60157	5.78624	5.61594	5.46686	5.67522	5.66906	-0.166497	-0.495637	0.620756	-0.387291	1.73851	-0.221869	-1.93801	0.460455	0.389582	-0.028593	0.0683902	-0.0191807	0.165491	-0.00481026	-0.153894	0.0544646	0.0483076	-1.02002	1.04855	-1.01338	1.12155	-1.00334	-1.11257	1.03847
hsa-piR-009511-gb-DQ582838-Homo	24	0	0.217506	0.217506	0.199342	0	1	0.0431716	91.0871	93.0871	93.1598	93.1666	0.321476	8	57	0.954598	2.93786	3.07555	3.08582	3.0475	3.00641	2.82458	3.05306	3.1372	2.79955	-0.495337	0.669853	0.756813	0.432476	0.0847671	-1.454	0.479561	1.19165	-1.66578	0.137686	0.147961	0.109636	0.0685484	-0.113281	0.1152	0.199344	-0.138306	1.10014	1.108	1.07896	1.04866	-1.08169	1.08312	1.14818
hsa-piR-010431-gb-DQ584049-Homo	25	0	0.217506	0.217506	0.199342	0	1	0.0431716	91.0871	93.0871	93.1598	93.1666	0.321476	8	57	0.954598	2.93786	3.07555	3.08582	3.0475	3.00641	2.82458	3.05306	3.1372	2.79955	-0.495337	0.669853	0.756813	0.432476	0.0847671	-1.454	0.479561	1.19165	-1.66578	0.137686	0.147961	0.109636	0.0685484	-0.113281	0.1152	0.199344	-0.138306	1.10014	1.108	1.07896	1.04866	-1.08169	1.08312	1.14818
hsa-piR-012681-gb-DQ587153-Homo	26	0	0.169518	0.169518	0.158009	0	1	0.0592069	76.8789	78.8789	78.9516	78.9583	0.448398	8	57	0.886551	3.0006	3.09273	3.08582	3.0475	3.14021	2.82458	3.05306	3.1372	2.79955	-0.155185	0.576571	0.521671	0.217275	0.953624	-1.55322	0.261465	0.929771	-1.75197	0.0921331	0.0852208	0.0468953	0.139607	-0.176022	0.0524592	0.136603	-0.201047	1.06595	1.06085	1.03304	1.1016	-1.12976	1.03703	1.09931
hsa-piR-012753-gb-DQ587269-Homo	27	0	0.217506	0.217506	0.199342	0	1	0.0431716	91.0871	93.0871	93.1598	93.1666	0.321476	8	57	0.954598	2.93786	3.07555	3.08582	3.0475	3.00641	2.82458	3.05306	3.1372	2.79955	-0.495337	0.669853	0.756813	0.432476	0.0847671	-1.454	0.479561	1.19165	-1.66578	0.137686	0.147961	0.109636	0.0685484	-0.113281	0.1152	0.199344	-0.138306	1.10014	1.108	1.07896	1.04866	-1.08169	1.08312	1.14818
hsa-piR-015026-gb-DQ590548-Homo	28	0	0.217506	0.217506	0.199342	0	1	0.0431716	91.0871	93.0871	93.1598	93.1666	0.321476	8	57	0.954598	2.93786	3.07555	3.08582	3.0475	3.00641	2.82458	3.05306	3.1372	2.79955	-0.495337	0.669853	0.756813	0.432476	0.0847671	-1.454	0.479561	1.19165	-1.66578	0.137686	0.147961	0.109636	0.0685484	-0.113281	0.1152	0.199344	-0.138306	1.10014	1.108	1.07896	1.04866	-1.08169	1.08312	1.14818
hsa-piR-015249-gb-DQ590830-Homo	29	0	0.217506	0.217506	0.198761	0	1	0.0403769	91.0871	93.0871	93.1598	93.1666	0.29979	8	57	0.963082	2.93786	3.07555	3.08582	3.0475	3.00641	2.82458	3.05306	3.1372	3.06259	-0.940496	0.535072	0.645195	0.234463	-0.205867	-2.15453	0.294091	1.19586	0.396209	0.137686	0.147961	0.109636	0.0685484	-0.113281	0.1152	0.199344	0.124728	1.10014	1.108	1.07896	1.04866	-1.08169	1.08312	1.14818
hsa-piR-015254-gb-DQ590835-Homo	30	0	0.217506	0.217506	0.199342	0	1	0.0431716	91.0871	93.0871	93.1598	93.1666	0.321476	8	57	0.954598	2.93786	3.07555	3.08582	3.0475	3.00641	2.82458	3.05306	3.1372	2.79955	-0.495337	0.669853	0.756813	0.432476	0.0847671	-1.454	0.479561	1.19165	-1.66578	0.137686	0.147961	0.109636	0.0685484	-0.113281	0.1152	0.199344	-0.138306	1.10014	1.108	1.07896	1.04866	-1.08169	1.08312	1.14818
hsa-piR-016440-gb-DQ592393-Homo	31	0.245374	0.18735	0.432724	0.387117	0.567044	0.432956	0.623112	99.6167	103.617	103.839	103.776	0.557322	8	57	0.808014	3.30496	3.38558	3.26089	3.41945	3.2394	3.05558	3.32029	3.43982	3.02441	0.220727	0.764958	-0.0767926	0.993611	-0.22185	-1.46279	0.324209	1.1311	-1.67317	0.0806181	-0.0440722	0.114489	-0.0655599	-0.249382	0.015329	0.134855	-0.280547	1.05747	-1.03102	1.08259	-1.04649	-1.1887	1.01068	1.09798
hsa-piR-016658-gb-DQ592931-Homo	32	0.112478	0.126546	0.239024	0.521947	0.470571	0.529429	0.810237	74.8249	78.8249	79.0472	78.9838	19.1533	8	57	1.33223e-13	5.35295	4.95853	4.69988	6.2248	6.15101	6.00908	6.06645	5.96551	5.3823	-0.521037	-1.22325	-1.68375	1.03117	0.899788	0.647108	0.74924	0.569532	-0.468798	-0.394423	-0.653073	0.871846	0.798053	0.656127	0.713493	0.612554	0.0293421	-1.31442	-1.57251	1.83	1.73875	1.57585	1.63977	1.52896
hsa-piR-016659-gb-DQ592932-Homo	33	0.0614563	0.285036	0.346492	1.2485	0.177367	0.822633	0.815299	113.496	117.496	117.718	117.655	25.7895	8	57	2.67633e-16	4.44564	4.24774	3.78058	5.34226	5.66033	6.28074	6.44876	6.47446	6.10363	-0.948309	-1.14083	-1.59529	-0.0760706	0.23335	0.83688	1.00034	1.02533	0.664594	-0.197902	-0.665065	0.896621	1.21469	1.83509	2.00312	2.02881	1.65799	-1.14703	-1.58564	1.8617	2.32091	3.56794	4.00866	4.08069
hsa-piR-016677-gb-DQ592953-Homo	34	0.0445379	0.133896	0.178434	0.175202	0.249604	0.750396	0.389451	72.4897	76.4897	76.712	76.6486	1.29992	8	57	0.262159	3.34944	3.26225	3.45537	3.40195	3.66124	3.32339	3.22684	3.53976	3.99784	-0.495515	-0.857872	-0.0553146	-0.277303	0.80028	-0.603809	-1.00502	0.295425	2.19913	-0.0871914	0.105923	0.052507	0.311799	-0.0260579	-0.1226	0.190319	0.648395	-1.0623	1.07618	1.03707	1.24125	-1.01823	-1.08869	1.14102
hsa-piR-016735-gb-DQ593039-Homo	35	0.0186369	0.148749	0.167386	0.174726	0.111341	0.888659	0.299168	74.2777	78.2777	78.5	78.4366	1.52427	8	57	0.169254	3.05331	3.28954	3.1465	3.36911	3.28711	2.82458	3.06794	3.20148	2.83606	-0.341225	0.876369	0.139096	1.2865	0.86386	-1.52021	-0.265827	0.422484	-1.46105	0.236225	0.0931868	0.315794	0.233798	-0.228734	0.0146279	0.148167	-0.217256	1.17791	1.06672	1.2447	1.17593	-1.17181	1.01019	1.10816
hsa-piR-016742-gb-DQ593049-Homo	36	0.0136845	0.211321	0.225006	0.208775	0.0608184	0.939182	0.149461	92.3606	96.3606	96.5828	96.5195	0.494201	8	57	0.855334	3.29275	3.16031	3.22819	3.112	3.05648	3.10846	3.19422	3.4685	2.85594	0.764479	-0.0225053	0.380852	-0.309535	-0.639434	-0.330578	0.178986	1.80873	-1.83099	-0.132449	-0.0645643	-0.180756	-0.236278	-0.184298	-0.0985383	0.175746	-0.436816	-1.09615	-1.04577	-1.13348	-1.17795	-1.13626	-1.07069	1.12955
hsa-piR-016745-gb-DQ593052-Homo	37	0.00378263	0.193776	0.197559	0.181269	0.0191469	0.980853	0.0781071	85.5181	89.5181	89.7404	89.677	0.347813	8	57	0.942999	3.03197	3.07555	3.1187	3.0475	3.00641	2.82458	3.05875	3.14929	2.79639	0.162183	0.518338	0.871044	0.289086	-0.0467216	-1.53282	0.381072	1.12106	-1.76324	0.0435768	0.0867318	0.015527	-0.0255603	-0.20739	0.0267818	0.117322	-0.235583	1.03067	1.06196	1.01082	-1.01787	-1.1546	1.01874	1.08472
hsa-piR-016792-gb-DQ593109-Homo	38	0	0.217506	0.217506	0.199342	0	1	0.0431716	91.0871	93.0871	93.1598	93.1666	0.321476	8	57	0.954598	2.93786	3.07555	3.08582	3.0475	3.00641	2.82458	3.05306	3.1372	2.79955	-0.495337	0.669853	0.756813	0.432476	0.0847671	-1.454	0.479561	1.19165	-1.66578	0.137686	0.147961	0.109636	0.0685484	-0.113281	0.1152	0.199344	-0.138306	1.10014	1.108	1.07896	1.04866	-1.08169	1.08312	1.14818
hsa-piR-016945-gb-DQ593356-Homo	39	0	0.217892	0.217892	0.200326	0	1	0.0461812	91.1882	93.1882	93.2609	93.2676	0.344972	8	57	0.944318	2.93786	3.07555	3.08582	3.0475	3.00641	2.82458	3.05306	3.17158	2.79955	-0.504006	0.60895	0.692011	0.382214	0.0500925	-1.4197	0.427188	1.38522	-1.62198	0.137686	0.147961	0.109636	0.0685484	-0.113281	0.1152	0.23372	-0.138306	1.10014	1.108	1.07896	1.04866	-1.08169	1.08312	1.17586
hsa-piR-016946-gb-DQ593358-Homo	40	0.0831136	0.233814	0.316928	0.396118	0.262248	0.737752	0.529258	104.605	108.605	108.827	108.764	3.68897	8	57	0.00157107	4.38849	4.45039	4.4692	5.09259	5.24026	4.55822	4.33152	4.32004	4.53424	-0.627948	-0.442724	-0.386428	1.4791	1.92104	-0.120019	-0.798448	-0.83279	-0.191777	0.0618946	0.0807068	0.704093	0.851772	0.16973	-0.0569747	-0.0684504	0.145752	1.04384	1.05754	1.62912	1.80472	1.12485	-1.04028	-1.04859
hsa-piR-017033-gb-DQ593538-Homo	41	0.0301346	0.265544	0.295679	0.306678	0.101917	0.898083	0.284895	106.974	110.974	111.196	111.132	1.66246	8	57	0.127788	3.70162	3.41143	3.86778	3.66825	3.37653	3.29245	3.71988	4.05921	4.31715	-0.0331726	-0.902235	0.464433	-0.133103	-1.00675	-1.25854	0.0214957	1.03771	1.81016	-0.290197	0.16616	-0.0333686	-0.325096	-0.409175	0.0182548	0.35759	0.615524	-1.22281	1.12207	-1.0234	-1.25275	-1.32793	1.01273	1.28128
hsa-piR-017104-gb-DQ593636-Homo	42	0	0.217506	0.217506	0.199342	0	1	0.0431716	91.0871	93.0871	93.1598	93.1666	0.321476	8	57	0.954598	2.93786	3.07555	3.08582	3.0475	3.00641	2.82458	3.05306	3.1372	2.79955	-0.495337	0.669853	0.756813	0.432476	0.0847671	-1.454	0.479561	1.19165	-1.66578	0.137686	0.147961	0.109636	0.0685484	-0.113281	0.1152	0.199344	-0.138306	1.10014	1.108	1.07896	1.04866	-1.08169	1.08312	1.14818
hsa-piR-017458-gb-DQ594126-Homo	43	0.000511597	0.219652	0.220163	0.20121	0.00232372	0.997676	0.0448559	91.776	95.776	95.9983	95.9349	0.302925	8	57	0.961916	2.95562	3.07555	3.08582	3.0475	3.00641	2.82458	3.05393	3.13912	2.79866	-0.364878	0.653762	0.741039	0.415518	0.0665385	-1.47785	0.470117	1.19374	-1.69799	0.11993	0.130206	0.0918804	0.0507931	-0.131037	0.0983087	0.183505	-0.156954	1.08668	1.09445	1.06576	1.03583	-1.09508	1.07052	1.13564
hsa-piR-017716-gb-DQ594453-Homo	44	0.0400693	0.16908	0.209149	0.219527	0.191582	0.808418	0.378689	84.1528	88.1528	88.3751	88.3117	1.6564	8	57	0.129391	4.42569	4.222	4.49655	4.64597	4.54877	4.26584	3.99016	4.30261	4.69202	0.119327	-0.785968	0.43422	1.09831	0.666323	-0.591121	-1.81636	-0.427686	1.30296	-0.203696	0.0708523	0.220275	0.123077	-0.159854	-0.435539	-0.123081	0.266323	-1.15164	1.05034	1.16496	1.08905	-1.11717	-1.35242	-1.08906
hsa-piR-017723-gb-DQ594464-Homo	45	0.00907595	0.164879	0.173955	0.164446	0.0521743	0.947826	0.153684	77.8483	81.8483	82.0705	82.0072	0.603777	8	57	0.770806	2.99907	3.07555	3.08582	3.18512	3.1486	2.82458	3.06696	3.16117	2.79994	-0.281393	0.26394	0.337217	1.04532	0.784876	-1.52574	0.202743	0.874504	-1.70146	0.0764719	0.0867476	0.186044	0.149523	-0.174495	0.0678903	0.162091	-0.199136	1.05444	1.06197	1.13764	1.1092	-1.12857	1.04818	1.11891
hsa-piR-017724-gb-DQ594465-Homo	46	0.315343	0.429567	0.74491	1.22114	0.42333	0.57667	0.723819	143.332	147.332	147.554	147.491	8.3994	8	57	1.87211e-07	5.13943	4.90318	4.86885	6.23996	5.83806	4.99796	4.13996	3.8193	3.54677	0.346318	0.0796537	0.0409034	1.58852	1.13489	0.186642	-0.781815	-1.14375	-1.45136	-0.236251	-0.270582	1.10053	0.698637	-0.141465	-0.999471	-1.32013	-1.59265	-1.17793	-1.20629	2.14433	1.62297	-1.10302	-1.99927	-2.49688
hsa-piR-017936-gb-DQ594740-Homo	47	0	0.212469	0.212469	0.194211	0	1	0.0406374	89.7516	91.7516	91.8243	91.831	0.301806	8	57	0.962334	2.93786	3.07555	3.08582	3.0475	3.00641	2.84177	3.05306	3.1372	2.79955	-0.524931	0.670858	0.760101	0.427247	0.070407	-1.3595	0.475569	1.20636	-1.72611	0.137686	0.147961	0.109636	0.0685484	-0.0960935	0.1152	0.199344	-0.138306	1.10014	1.108	1.07896	1.04866	-1.06888	1.08312	1.14818
hsa-piR-018570-gb-DQ595536-Homo	48	0.0604405	0.263937	0.324377	0.424519	0.186328	0.813672	0.497938	109.381	113.381	113.604	113.54	3.7749	8	57	0.00130584	5.08382	4.98786	4.77781	5.36557	5.71179	5.47042	4.70113	4.55421	4.4397	0.168808	-0.0513889	-0.533416	0.815361	1.60987	1.05598	-0.709372	-1.04653	-1.30931	-0.0959556	-0.306009	0.281749	0.627974	0.386604	-0.382685	-0.529611	-0.644122	-1.06877	-1.23628	1.21567	1.54539	1.30731	-1.30377	-1.44354
hsa-piR-018849-gb-DQ595899-Homo	49	0	0.134021	0.134021	0.126042	0	1	0.0675618	63.4862	65.4862	65.5589	65.5656	0.516257	8	57	0.839303	3.14255	3.18155	3.13314	3.2785	3.37121	3.14149	3.0969	3.25856	3.47763	-0.697807	-0.391142	-0.771872	0.371341	1.10049	-0.706149	-1.05686	0.21456	1.93744	0.0389925	-0.00941747	0.135943	0.228654	-0.00106071	-0.045654	0.116008	0.335073	1.0274	-1.00655	1.09881	1.17174	-1.00074	-1.03215	1.08373
hsa-piR-019420-gb-DQ596670-Homo	50	0	0.883053	0.883053	2.70824	0	1	0.714069	170.953	172.953	173.026	173.033	17.7936	8	57	5.71105e-13	2.93786	3.07555	3.08582	3.0475	3.96924	5.44106	6.76221	6.16571	6.61718	-0.980554	-0.897678	-0.891493	-0.914562	-0.359745	0.526174	1.3214	0.962356	1.2341	0.137686	0.147961	0.109636	1.03138	2.5032	3.82435	3.22785	3.67932	1.10014	1.108	1.07896	2.04398	5.66942	14.1659	9.36872
hsa-piR-019675-gb-DQ596992-Homo	51	0	0.217506	0.217506	0.199342	0	1	0.0431716	91.0871	93.0871	93.1598	93.1666	0.321476	8	57	0.954598	2.93786	3.07555	3.08582	3.0475	3.00641	2.82458	3.05306	3.1372	2.79955	-0.495337	0.669853	0.756813	0.432476	0.0847671	-1.454	0.479561	1.19165	-1.66578	0.137686	0.147961	0.109636	0.0685484	-0.113281	0.1152	0.199344	-0.138306	1.10014	1.108	1.07896	1.04866	-1.08169	1.08312	1.14818
hsa-piR-019676-gb-DQ596993-Homo	52	0	0.217506	0.217506	0.199342	0	1	0.0431716	91.0871	93.0871	93.1598	93.1666	0.321476	8	57	0.954598	2.93786	3.07555	3.08582	3.0475	3.00641	2.82458	3.05306	3.1372	2.79955	-0.495337	0.669853	0.756813	0.432476	0.0847671	-1.454	0.479561	1.19165	-1.66578	0.137686	0.147961	0.109636	0.0685484	-0.113281	0.1152	0.199344	-0.138306	1.10014	1.108	1.07896	1.04866	-1.08169	1.08312	1.14818
hsa-piR-019752-gb-DQ597110-Homo	53	0	0.268498	0.268498	0.359058	0	1	0.344251	103.092	105.092	105.165	105.172	3.74045	8	57	0.00140624	2.93786	3.07555	3.08582	3.0475	3.00641	2.82458	3.58771	4.22694	3.79955	-0.739449	-0.448668	-0.426966	-0.507907	-0.59468	-0.97869	0.632981	1.983	1.08038	0.137686	0.147961	0.109636	0.0685484	-0.113281	0.649848	1.28908	0.861694	1.10014	1.108	1.07896	1.04866	-1.08169	1.569	2.44373
hsa-piR-019912-gb-DQ597341-Homo	54	0	0.147952	0.147952	0.148245	0	1	0.124809	69.1229	71.1229	71.1956	71.2023	1.01608	8	57	0.434563	3.06106	3.07555	3.08582	3.32348	3.19528	2.82458	3.05306	3.1372	2.79955	-0.00407027	0.0837082	0.145975	1.58611	0.809247	-1.43706	-0.0525486	0.457335	-1.5887	0.0144858	0.0247614	0.262423	0.134219	-0.236481	-0.0080002	0.0761441	-0.261506	1.01009	1.01731	1.19949	1.0975	-1.17812	-1.00556	1.0542
hsa-piR-019914-gb-DQ597347-Homo	55	0.117002	0.161698	0.278699	0.307293	0.419813	0.580187	0.586776	87.5539	91.5539	91.7762	91.7128	5.31014	8	57	5.40478e-05	3.88072	3.51063	3.74221	3.80902	3.83084	4.15849	4.23168	4.76822	5.21041	-0.451908	-1.13124	-0.706151	-0.583517	-0.543468	0.0579664	0.192306	1.17717	1.98885	-0.370092	-0.138509	-0.0716988	-0.049881	0.277773	0.35096	0.887498	1.32969	-1.29244	-1.10077	-1.05095	-1.03518	1.21232	1.27541	1.84997
hsa-piR-019951-gb-DQ597403-Homo	56	0	0.226632	0.226632	0.208547	0	1	0.0470312	93.43	95.43	95.5028	95.5095	0.351635	8	57	0.9412	2.93786	3.07555	3.08582	3.0475	3.00641	2.87189	3.07598	3.25856	2.79955	-0.591592	0.428883	0.505042	0.220988	-0.0835363	-1.08052	0.432079	1.78532	-1.61667	0.137686	0.147961	0.109636	0.0685484	-0.0659674	0.138117	0.320701	-0.138306	1.10014	1.108	1.07896	1.04866	-1.04679	1.10047	1.24894
hsa-piR-020326-gb-DQ597916-Homo	57	0.00801404	0.135234	0.143248	0.190121	0.0559451	0.944055	0.400802	66.7122	70.7122	70.9345	70.8711	3.89406	8	57	0.00101154	3.21844	3.17442	3.1832	3.73815	3.7858	3.65792	3.62319	3.25803	3.34866	-0.884177	-1.05741	-1.02286	1.16128	1.34882	0.845532	0.708816	-0.728357	-0.37166	-0.0440143	-0.0352353	0.51971	0.567361	0.439484	0.404747	0.0395908	0.13022	-1.03098	-1.02472	1.43367	1.48181	1.35612	1.32386	1.02782
hsa-piR-020365-gb-DQ597975-Homo	58	0	0.314271	0.314271	0.598263	0	1	0.539347	112.065	114.065	114.138	114.144	8.34217	8	57	2.06163e-07	2.93786	3.07555	3.08582	3.06468	3.11929	3.44175	4.2274	4.77978	5.17807	-0.846601	-0.684442	-0.67234	-0.697235	-0.632924	-0.253141	0.672152	1.32273	1.7918	0.137686	0.147961	0.126824	0.181428	0.503893	1.28954	1.84192	2.24021	1.10014	1.108	1.09189	1.13401	1.41803	2.44449	3.58487
hsa-piR-020381-gb-DQ597997-Homo	59	0	0.217506	0.217506	0.199342	0	1	0.0431716	91.0871	93.0871	93.1598	93.1666	0.321476	8	57	0.954598	2.93786	3.07555	3.08582	3.0475	3.00641	2.82458	3.05306	3.1372	2.79955	-0.495337	0.669853	0.756813	0.432476	0.0847671	-1.454	0.479561	1.19165	-1.66578	0.137686	0.147961	0.109636	0.0685484	-0.113281	0.1152	0.199344	-0.138306	1.10014	1.108	1.07896	1.04866	-1.08169	1.08312	1.14818
hsa-piR-020450-gb-DQ598104-Homo	60	0	0.198388	0.198388	0.204527	0	1	0.149402	85.843	87.843	87.9157	87.9224	1.25146	8	57	0.287041	3.23556	3.18843	3.31009	3.343	3.41619	2.84177	3.05306	3.1372	2.79955	0.410939	0.191711	0.757533	0.910608	1.25104	-1.42056	-0.437861	-0.046515	-1.61689	-0.0471367	0.0745222	0.107435	0.180632	-0.393795	-0.182502	-0.0983582	-0.436008	-1.03321	1.05301	1.07731	1.13338	-1.31385	-1.13485	-1.07055
hsa-piR-020485-gb-DQ598159-Homo	61	0	0.217506	0.217506	0.199342	0	1	0.0431716	91.0871	93.0871	93.1598	93.1666	0.321476	8	57	0.954598	2.93786	3.07555	3.08582	3.0475	3.00641	2.82458	3.05306	3.1372	2.79955	-0.495337	0.669853	0.756813	0.432476	0.0847671	-1.454	0.479561	1.19165	-1.66578	0.137686	0.147961	0.109636	0.0685484	-0.113281	0.1152	0.199344	-0.138306	1.10014	1.108	1.07896	1.04866	-1.08169	1.08312	1.14818
hsa-piR-020492-gb-DQ598170-Homo	62	0	0.18755	0.18755	0.177592	0	1	0.0739019	82.6409	84.6409	84.7137	84.7204	0.568569	8	57	0.799161	2.93786	3.07555	3.08582	3.0475	3.20453	2.82458	3.05306	3.1372	2.79955	-0.587116	0.416511	0.491413	0.212048	1.3567	-1.41285	0.252605	0.865955	-1.59527	0.137686	0.147961	0.109636	0.266669	-0.113281	0.1152	0.199344	-0.138306	1.10014	1.108	1.07896	1.20303	-1.08169	1.08312	1.14818
hsa-piR-020496-gb-DQ598175-Homo	63	0.124354	0.127279	0.251633	0.371054	0.494189	0.505811	0.731892	75.7367	79.7367	79.9589	79.8956	7.81634	8	57	5.07164e-07	3.90806	4.31264	3.7347	4.47299	4.77607	4.35448	3.91021	3.70155	3.70983	-0.48529	0.549291	-0.92859	0.959324	1.73434	0.656272	-0.479782	-1.01337	-0.992198	0.404585	-0.173358	0.564934	0.868013	0.446421	0.00215407	-0.206511	-0.198232	1.32371	-1.12768	1.47932	1.82515	1.36266	1.00149	-1.15389
hsa-piR-020499-gb-DQ598183-Homo	64	0.00138586	0.213707	0.215093	0.197977	0.00644305	0.993557	0.0591378	90.4372	94.4372	94.6594	94.596	0.361016	8	57	0.936661	2.93847	3.07555	3.08582	3.0475	3.00641	2.82458	3.05519	3.20793	2.93488	-0.736761	0.508181	0.601502	0.253438	-0.119707	-1.77105	0.323286	1.71043	-0.769327	0.137081	0.147357	0.109031	0.0679442	-0.113886	0.116722	0.269462	-0.00358577	1.09968	1.10754	1.0785	1.04822	-1.08214	1.08427	1.20536
hsa-piR-020500-gb-DQ598190-Homo	65	0	0.206218	0.206218	0.190229	0	1	0.0493707	88.0496	90.0496	90.1223	90.129	0.370035	8	57	0.932135	2.93786	3.07555	3.08582	3.09481	3.00641	2.82458	3.05306	3.1372	2.79955	-0.524053	0.607091	0.69151	0.765354	0.039101	-1.45471	0.422359	1.11364	-1.66029	0.137686	0.147961	0.15695	0.0685484	-0.113281	0.1152	0.199344	-0.138306	1.10014	1.108	1.11493	1.04866	-1.08169	1.08312	1.14818
hsa-piR-020813-gb-DQ598646-Homo	66	0.0324632	0.232566	0.26503	0.395255	0.122489	0.877511	0.517319	100.139	104.139	104.361	104.298	5.66332	8	57	2.68988e-05	4.27209	3.7409	4.02518	3.67584	3.74119	2.97789	3.4931	3.59173	2.98632	1.55042	0.303541	0.970843	0.150834	0.304237	-1.48747	-0.278118	-0.0466005	-1.46769	-0.531194	-0.246912	-0.59625	-0.530897	-1.2942	-0.778991	-0.68036	-1.28577	-1.44512	-1.18666	-1.51178	-1.44483	-2.4524	-1.71593	-1.60254
hsa-piR-020815-gb-DQ598651-Homo	67	0	0.217506	0.217506	0.199342	0	1	0.0431716	91.0871	93.0871	93.1598	93.1666	0.321476	8	57	0.954598	2.93786	3.07555	3.08582	3.0475	3.00641	2.82458	3.05306	3.1372	2.79955	-0.495337	0.669853	0.756813	0.432476	0.0847671	-1.454	0.479561	1.19165	-1.66578	0.137686	0.147961	0.109636	0.0685484	-0.113281	0.1152	0.199344	-0.138306	1.10014	1.108	1.07896	1.04866	-1.08169	1.08312	1.14818
hsa-piR-020893-gb-DQ598752-Homo	68	0	0.157551	0.157551	0.156686	0	1	0.118235	72.7061	74.7061	74.7788	74.7855	0.955386	8	57	0.479581	2.93786	3.07555	3.13314	3.1977	3.18686	2.88526	3.15998	3.1372	3.64755	-0.989014	-0.350821	-0.0838853	0.215382	0.165134	-1.23284	0.0405626	-0.0650263	2.3005	0.137686	0.195275	0.25984	0.248999	-0.052603	0.222124	0.199344	0.709691	1.10014	1.14494	1.19735	1.18838	-1.03713	1.16645	1.14818
hsa-piR-021032-gb-DQ598918-Homo	69	0.00782495	0.227802	0.235627	0.230088	0.033209	0.966791	0.154726	95.422	99.422	99.6442	99.5809	0.813949	8	57	0.593312	4.54781	4.57684	4.5943	4.70975	4.89268	4.72294	4.33227	4.43269	4.7363	-0.401456	-0.231	-0.128435	0.549483	1.62365	0.626924	-1.66711	-1.07746	0.70541	0.029028	0.0464943	0.161941	0.344866	0.175129	-0.215535	-0.115121	0.188495	1.02032	1.03275	1.11879	1.27003	1.12907	-1.16113	-1.08307
hsa-piR-021462-gb-DQ599459-Homo	70	0.0613006	0.236974	0.298275	0.341501	0.205517	0.794483	0.441684	103.801	107.801	108.023	107.96	2.63836	8	57	0.0156058	5.3693	4.93539	4.88216	5.20762	5.26264	4.83752	4.54093	4.61686	5.0727	1.40558	-0.119753	-0.306891	0.837223	1.03065	-0.463813	-1.50644	-1.23952	0.362952	-0.433904	-0.487139	-0.161679	-0.106654	-0.531777	-0.828368	-0.752438	-0.296592	-1.35088	-1.40166	-1.11859	-1.07673	-1.44571	-1.77568	-1.68464
hsa-piR-023279-gb-DQ601838-Homo	71	0	0.217506	0.217506	0.199342	0	1	0.0431716	91.0871	93.0871	93.1598	93.1666	0.321476	8	57	0.954598	2.93786	3.07555	3.08582	3.0475	3.00641	2.82458	3.05306	3.1372	2.79955	-0.495337	0.669853	0.756813	0.432476	0.0847671	-1.454	0.479561	1.19165	-1.66578	0.137686	0.147961	0.109636	0.0685484	-0.113281	0.1152	0.199344	-0.138306	1.10014	1.108	1.07896	1.04866	-1.08169	1.08312	1.14818
hsa-let-7a-3p	72	0	0.197913	0.197913	0.210499	0	1	0.175511	85.7063	87.7063	87.7791	87.7858	1.51671	8	57	0.171837	3.53887	3.51165	3.98303	3.78238	3.6673	3.65351	3.29281	3.77271	3.17807	-0.235532	-0.344274	1.5392	0.737456	0.277648	0.222543	-1.21868	0.698808	-1.67716	-0.0272151	0.444167	0.243512	0.128435	0.114644	-0.246056	0.23384	-0.360801	-1.01904	1.36053	1.18387	1.09311	1.08271	-1.18596	1.17596
hsa-let-7a-5p	73	0.00846705	0.0137131	0.0221802	0.0282625	0.381739	0.618261	0.61786	-54.0196	-50.0196	-49.7974	-49.8607	5.54652	8	57	3.38303e-05	15.7654	15.725	15.783	15.853	15.7624	15.7102	15.53	15.4951	15.6931	0.541034	0.196363	0.691164	1.28817	0.515841	0.0708433	-1.4649	-1.76321	-0.0752988	-0.0404372	0.0176135	0.0876551	-0.00295566	-0.0551634	-0.23534	-0.270337	-0.072309	-1.02843	1.01228	1.06264	-1.00205	-1.03898	-1.17718	-1.20609
hsa-let-7b-3p	74	0.00373781	0.0918342	0.095572	0.0981425	0.0391099	0.96089	0.204137	43.9109	47.9109	48.1331	48.0698	1.28389	8	57	0.270184	3.38214	3.67369	3.45769	3.5936	3.64555	3.37413	3.51185	3.51401	3.16148	-0.61068	1.2208	-0.136041	0.717685	1.04404	-0.660944	0.204189	0.217734	-1.99679	0.291555	0.0755581	0.211463	0.263416	-0.00800152	0.129719	0.131876	-0.220655	1.22396	1.05377	1.15786	1.20032	-1.00556	1.09408	1.09572
hsa-let-7b-5p	75	0.0442726	0.0246893	0.0689619	0.072077	0.641987	0.358013	0.734066	-13.8697	-9.8697	-9.64747	-9.71081	4.46564	8	57	0.000302576	13.7803	13.7314	13.7734	13.6805	13.6808	13.6531	13.4415	13.3915	13.6373	1.01525	0.658389	0.964784	0.287358	0.289652	0.0875686	-1.45546	-1.81981	-0.0277252	-0.0489433	-0.00692098	-0.0998305	-0.0995159	-0.127232	-0.338859	-0.388831	-0.143045	-1.03451	-1.00481	-1.07165	-1.07141	-1.0922	-1.26476	-1.30933
hsa-let-7c-5p	76	0.0109243	0.0118249	0.0227493	0.0305478	0.480206	0.519794	0.697202	-60.0506	-56.0506	-55.8283	-55.8917	6.94968	8	57	2.36939e-06	9.12975	9.20992	9.13456	9.27595	9.20169	9.37943	9.19108	9.3718	9.63309	-0.942109	-0.442124	-0.912092	-0.03031	-0.493423	0.615083	-0.559602	0.567507	2.19707	0.0801676	0.00481294	0.146198	0.0719424	0.24968	0.0613312	0.242052	0.503336	1.05714	1.00334	1.10665	1.05113	1.18894	1.04343	1.18267
hsa-let-7d-3p	77	0.0118115	0.130855	0.142666	0.161812	0.0827915	0.917209	0.327233	65.9207	69.9207	70.1429	70.0795	2.30893	8	57	0.0321409	5.16871	5.36089	5.24329	5.39469	5.79993	5.43138	5.45859	5.19384	5.35148	-1.11026	-0.0911706	-0.714804	0.0880184	2.2369	0.282578	0.426888	-0.977033	-0.141112	0.192183	0.074577	0.225975	0.631217	0.262666	0.28988	0.0251251	0.182765	1.14249	1.05305	1.16957	1.54887	1.19969	1.22254	1.01757
hsa-let-7d-5p	78	0.00725887	0.0416458	0.0489046	0.0643845	0.148429	0.851571	0.473187	2.96012	6.96012	7.18234	7.119	4.74356	8	57	0.00017024	11.3084	11.3241	11.3354	11.3797	11.2746	11.2129	11.0703	10.718	11.1443	0.546851	0.623406	0.678406	0.894883	0.381774	0.0805189	-0.615845	-2.33561	-0.254388	0.0156802	0.0269453	0.0712844	-0.0338113	-0.0955148	-0.238145	-0.590389	-0.164111	1.01093	1.01885	1.05065	-1.02371	-1.06845	-1.17948	-1.50565
hsa-let-7e-5p	79	0.0524212	0.148546	0.200968	0.183619	0.260844	0.739156	0.354698	78.7104	82.7104	82.9326	82.8693	0.507294	8	57	0.845889	4.49023	4.58491	4.51836	4.77435	4.58379	4.59197	4.50426	4.72047	4.3811	-0.685454	0.106698	-0.450095	1.69163	0.0972799	0.165708	-0.568096	1.24084	-1.59851	0.0946819	0.0281312	0.284121	0.0935562	0.101735	0.0140272	0.23024	-0.109133	1.06783	1.01969	1.21767	1.067	1.07306	1.00977	1.17303
hsa-let-7f-1-3p	80	0.00128056	0.191705	0.192986	0.177429	0.00663549	0.993365	0.0584214	84.2546	88.2546	88.4768	88.4135	0.351733	8	57	0.941154	2.96369	3.07555	3.08582	3.06468	3.0236	2.82458	3.0551	3.14181	2.79743	-0.334234	0.602915	0.689007	0.511912	0.167673	-1.49974	0.431567	1.1581	-1.7272	0.111855	0.122131	0.100993	0.059906	-0.139112	0.0914037	0.17812	-0.16626	1.08062	1.08834	1.07251	1.0424	-1.10123	1.06541	1.13141
hsa-let-7f-2-3p	81	0	0.217506	0.217506	0.199342	0	1	0.0431716	91.0871	93.0871	93.1598	93.1666	0.321476	8	57	0.954598	2.93786	3.07555	3.08582	3.0475	3.00641	2.82458	3.05306	3.1372	2.79955	-0.495337	0.669853	0.756813	0.432476	0.0847671	-1.454	0.479561	1.19165	-1.66578	0.137686	0.147961	0.109636	0.0685484	-0.113281	0.1152	0.199344	-0.138306	1.10014	1.108	1.07896	1.04866	-1.08169	1.08312	1.14818
hsa-let-7f-5p	82	0.00513143	0.0146536	0.019785	0.0270652	0.25936	0.74064	0.568046	-53.3535	-49.3535	-49.1312	-49.1946	4.76559	8	57	0.000162708	16.3429	16.3452	16.43	16.4187	16.247	16.2768	16.1037	16.2153	16.3661	0.360386	0.38264	1.19057	1.08282	-0.553719	-0.269233	-1.91936	-0.855778	0.581678	0.00233439	0.0870855	0.075782	-0.0958885	-0.0660462	-0.239143	-0.127574	0.0232131	1.00162	1.06222	1.05393	-1.06872	-1.04684	-1.18029	-1.09246
hsa-let-7g-3p	83	0.0120719	0.164695	0.176766	0.170869	0.0682931	0.931707	0.193003	78.4584	82.4584	82.6806	82.6173	0.801168	8	57	0.604043	3.03351	3.12286	3.42027	3.0475	3.13848	3.02977	3.14067	3.18378	2.80902	-0.428165	0.123382	1.95922	-0.341828	0.219813	-0.451235	0.233314	0.499414	-1.81391	0.0893503	0.386755	0.0139866	0.104972	-0.00373732	0.107159	0.150267	-0.224491	1.06389	1.30745	1.00974	1.07547	-1.00259	1.07711	1.10978
hsa-let-7g-5p	84	0.00397932	0.0176723	0.0216516	0.0211601	0.183789	0.816211	0.325237	-44.8059	-40.8059	-40.5836	-40.647	1.22347	8	57	0.302255	13.529	13.5308	13.5803	13.6336	13.5195	13.5553	13.5234	13.6477	13.802	-0.675277	-0.655445	-0.118707	0.458541	-0.778747	-0.389895	-0.735576	0.610985	2.28412	0.00182952	0.0513442	0.104596	-0.0095453	0.0263268	-0.00556266	0.118659	0.273008	1.00127	1.03623	1.07519	-1.00664	1.01842	-1.00386	1.08573
hsa-let-7i-3p	85	0.0496996	0.136918	0.186618	0.195367	0.266318	0.733682	0.441388	74.2098	78.2098	78.4321	78.3687	1.8961	8	57	0.0783484	3.40364	3.68775	3.81344	3.67156	3.63285	3.6313	3.7839	3.87319	4.48909	-1.24377	-0.295546	0.123953	-0.349569	-0.478789	-0.483961	0.0253426	0.323377	2.37896	0.284108	0.409799	0.267922	0.229204	0.227655	0.380253	0.469551	1.08545	1.21766	1.3285	1.20407	1.17219	1.17093	1.30157	1.38468
hsa-let-7i-5p	86	0.0810769	0.0145274	0.0956043	0.109725	0.848047	0.151953	0.897837	-36.4731	-32.4731	-32.2509	-32.3143	12.5817	8	57	3.33224e-10	14.1542	14.1147	14.069	13.9916	13.9069	13.8693	13.6957	13.7973	13.6861	1.34074	1.1144	0.852286	0.40766	-0.0780671	-0.293881	-1.29041	-0.707374	-1.34535	-0.0394401	-0.0851147	-0.162593	-0.247233	-0.28484	-0.458489	-0.356893	-0.468064	-1.02771	-1.06077	-1.1193	-1.18693	-1.21827	-1.3741	-1.28066
hsa-miR-100-5p	87	0	0.408166	0.408166	0.43593	0	1	0.178926	126.966	128.966	129.038	129.045	1.55265	8	57	0.159858	2.93786	3.07555	3.08582	3.0475	3.00641	3.01026	3.66198	3.90135	2.79955	-0.639219	-0.259411	-0.231066	-0.336787	-0.450127	-0.439511	1.35828	2.01858	-1.02074	0.137686	0.147961	0.109636	0.0685484	0.072397	0.724119	0.96349	-0.138306	1.10014	1.108	1.07896	1.04866	1.05146	1.65189	1.95002
hsa-miR-101-3p	88	0.0698958	0.0968589	0.166755	0.192811	0.419153	0.580847	0.605487	58.3268	62.3268	62.549	62.4857	4.48143	8	57	0.000292785	12.0241	12.3248	12.2637	12.3183	12.4904	12.6568	12.6166	12.677	12.6724	-1.85087	-0.542166	-0.808099	-0.570513	0.178936	0.903009	0.727918	0.991053	0.970734	0.300679	0.23958	0.294166	0.466354	0.632711	0.592484	0.65294	0.648271	1.23172	1.18065	1.22618	1.38161	1.55048	1.50784	1.57237
hsa-miR-101-5p	89	0.0656934	0.157697	0.223391	0.258952	0.294074	0.705926	0.51626	82.9908	86.9908	87.213	87.1496	3.31699	8	57	0.00352029	3.25832	3.71569	3.71095	3.58006	3.91826	3.90469	3.85116	3.9525	4.04345	-2.13826	-0.229074	-0.24884	-0.795219	0.616516	0.559868	0.336449	0.759441	1.13912	0.457366	0.452631	0.32174	0.659936	0.646366	0.592843	0.694176	0.785131	1.37303	1.36853	1.24984	1.58001	1.56522	1.50822	1.61796
hsa-miR-103a-2-5p	90	0	0.288541	0.288541	0.290228	0	1	0.128175	107.196	109.196	109.269	109.275	1.04751	8	57	0.412322	2.93786	3.07555	3.08582	3.0475	3.00641	2.84177	3.48747	3.45296	2.79955	-0.594996	-0.0252733	0.0172458	-0.141339	-0.311352	-0.992616	1.67919	1.53642	-1.16729	0.137686	0.147961	0.109636	0.0685484	-0.0960935	0.549607	0.515102	-0.138306	1.10014	1.108	1.07896	1.04866	-1.06888	1.46369	1.4291
hsa-miR-103a-3p	91	0.00717032	0.0441784	0.0513487	0.0817814	0.13964	0.86036	0.559019	6.03996	10.04	10.2622	10.1988	7.20541	8	57	1.49189e-06	12.9008	12.8683	12.9109	12.7341	12.7709	13.1532	13.3386	13.2926	13.3877	-0.545822	-0.673423	-0.506	-1.20054	-1.05606	0.446135	1.17438	0.993766	1.36756	-0.0324762	0.0101352	-0.166635	-0.129862	0.252467	0.437815	0.391847	0.486984	-1.02277	1.00705	-1.12244	-1.09419	1.19124	1.35455	1.31207
hsa-miR-103b	92	0.0074628	0.10485	0.112313	0.114797	0.0664465	0.933554	0.234626	52.6444	56.6444	56.8666	56.8032	1.31376	8	57	0.255381	8.25587	7.98109	8.21799	8.12457	8.35195	8.34724	8.33238	8.46992	8.32345	-0.078161	-1.98088	-0.340517	-0.987359	0.587102	0.554504	0.451569	1.40399	0.38975	-0.274781	-0.0378881	-0.131301	0.0960738	0.0913661	0.0765007	0.214044	0.0675733	-1.20981	-1.02661	-1.09528	1.06886	1.06538	1.05446	1.15994
hsa-miR-106a-3p	93	0	0.217506	0.217506	0.199342	0	1	0.0431716	91.0871	93.0871	93.1598	93.1666	0.321476	8	57	0.954598	2.93786	3.07555	3.08582	3.0475	3.00641	2.82458	3.05306	3.1372	2.79955	-0.495337	0.669853	0.756813	0.432476	0.0847671	-1.454	0.479561	1.19165	-1.66578	0.137686	0.147961	0.109636	0.0685484	-0.113281	0.1152	0.199344	-0.138306	1.10014	1.108	1.07896	1.04866	-1.08169	1.08312	1.14818
hsa-miR-106a-5p	94	0.0416134	0.171738	0.213352	0.217311	0.195046	0.804954	0.362911	85.1439	89.1439	89.3661	89.3027	1.18392	8	57	0.324817	6.98231	6.87097	6.62943	6.94906	7.07608	6.83992	6.65651	6.61556	7.12282	0.637023	0.0557474	-1.20529	0.46341	1.12656	-0.106379	-1.06395	-1.27774	1.37061	-0.111338	-0.352877	-0.0332539	0.0937653	-0.142391	-0.325804	-0.366754	0.140512	-1.08023	-1.2771	-1.02332	1.06715	-1.10373	-1.25336	-1.28945
hsa-miR-106b-3p	95	0.00247818	0.0478687	0.0503469	0.0954544	0.0492221	0.950778	0.57601	7.22556	11.2256	11.4478	11.3844	8.66072	8	57	1.20984e-07	10.9601	10.7712	10.9408	10.474	10.5336	10.3946	10.5268	10.5002	10.3553	1.55814	0.726316	1.47333	-0.582591	-0.32017	-0.932356	-0.350231	-0.466964	-1.10547	-0.188882	-0.019258	-0.486096	-0.426508	-0.565517	-0.433334	-0.459841	-0.604826	-1.13988	-1.01344	-1.40065	-1.34398	-1.47992	-1.35035	-1.37539
hsa-miR-106b-5p	96	0.0162515	0.114607	0.130859	0.139805	0.124191	0.875809	0.327861	59.8606	63.8606	64.0828	64.0195	1.71943	8	57	0.113581	6.47496	6.60511	6.51291	6.77168	6.76062	6.64767	6.63623	6.18627	6.15586	-0.235733	0.343565	-0.0668396	1.08502	1.03575	0.533015	0.482086	-1.52074	-1.65612	0.130145	0.0379437	0.296721	0.285651	0.172708	0.161266	-0.28869	-0.319106	1.0944	1.02665	1.22835	1.21896	1.12717	1.11827	-1.22153
hsa-miR-107	97	0.0213599	0.0296994	0.0510593	0.0506954	0.418335	0.581665	0.539892	-9.07452	-5.07452	-4.85229	-4.91563	1.75564	8	57	0.10533	11.0687	10.9157	11.0077	10.9312	10.966	11.0491	11.1845	11.1223	11.1367	0.277136	-1.33896	-0.366554	-1.17582	-0.807233	0.0707454	1.50108	0.843824	0.995777	-0.152941	-0.0609163	-0.137502	-0.10262	-0.019532	0.115829	0.0536292	0.0680094	-1.11183	-1.04313	-1.1	-1.07372	-1.01363	1.0836	1.03787
hsa-miR-10a-3p	98	0	0.258408	0.258408	0.254182	0	1	0.108494	100.909	102.909	102.982	102.989	0.867097	8	57	0.549359	2.93786	3.07555	3.08582	3.0475	3.00641	2.82458	3.27338	3.49943	2.79955	-0.565011	0.066129	0.113232	-0.0624493	-0.25079	-1.08428	0.972991	2.00918	-1.199	0.137686	0.147961	0.109636	0.0685484	-0.113281	0.335521	0.561569	-0.138306	1.10014	1.108	1.07896	1.04866	-1.08169	1.26183	1.47587
hsa-miR-10a-5p	99	0	0.497776	0.497776	1.0863	0	1	0.598168	138.279	140.279	140.352	140.358	10.6063	8	57	5.62304e-09	4.07918	4.0051	4.03108	4.40707	4.20365	4.95224	6.12704	6.5447	5.64755	-0.823532	-0.898902	-0.872476	-0.489939	-0.696903	0.0647283	1.25997	1.68491	0.772139	-0.0740808	-0.0481065	0.327885	0.124462	0.873062	2.04786	2.46552	1.56837	-1.05269	-1.03391	1.25517	1.0901	1.83155	4.13491	5.52326
hsa-miR-10b-3p	100	0	0.215451	0.215451	0.197745	0	1	0.0445548	90.5462	92.5462	92.6189	92.6256	0.332256	8	57	0.950021	2.93786	3.07555	3.08582	3.0475	3.00641	2.84177	3.11615	3.1372	2.79955	-0.558929	0.581993	0.667141	0.34956	0.0090929	-1.3552	0.918416	1.09292	-1.70499	0.137686	0.147961	0.109636	0.0685484	-0.0960935	0.178285	0.199344	-0.138306	1.10014	1.108	1.07896	1.04866	-1.06888	1.13154	1.14818
hsa-miR-10b-5p	101	0.0179699	0.795717	0.813687	1.93612	0.0220845	0.977915	0.646361	166.18	170.18	170.402	170.338	12.5652	8	57	3.40817e-10	2.94252	3.07555	3.08582	3.0475	3.00641	4.07913	5.57198	6.49602	6.07539	-0.818539	-0.728614	-0.721667	-0.747575	-0.775351	-0.0501824	0.958987	1.58364	1.2993	0.133024	0.1433	0.104975	0.0638873	1.13661	2.62945	3.55349	3.13287	1.09659	1.10443	1.07548	1.04528	2.19864	6.18792	11.7411
hsa-miR-1180-3p	102	0.128077	0.0784971	0.206575	0.3144	0.620006	0.379994	0.806004	51.4465	55.4465	55.6687	55.6054	17.2363	8	57	1.05999e-12	5.90427	5.90525	5.81981	6.53959	6.42429	5.7362	5.34971	5.24741	4.43297	0.30956	0.311102	0.177285	1.30457	1.12399	0.0463388	-0.558959	-0.719178	-1.99472	0.000984445	-0.0844585	0.635322	0.520022	-0.168069	-0.554556	-0.656857	-1.4713	1.00068	-1.06029	1.55328	1.43398	-1.12355	-1.46872	-1.57664
hsa-miR-1180-5p	103	0	0.217506	0.217506	0.199342	0	1	0.0431716	91.0871	93.0871	93.1598	93.1666	0.321476	8	57	0.954598	2.93786	3.07555	3.08582	3.0475	3.00641	2.82458	3.05306	3.1372	2.79955	-0.495337	0.669853	0.756813	0.432476	0.0847671	-1.454	0.479561	1.19165	-1.66578	0.137686	0.147961	0.109636	0.0685484	-0.113281	0.1152	0.199344	-0.138306	1.10014	1.108	1.07896	1.04866	-1.08169	1.08312	1.14818
hsa-miR-1185-1-3p	104	0	0.217506	0.217506	0.199342	0	1	0.0431716	91.0871	93.0871	93.1598	93.1666	0.321476	8	57	0.954598	2.93786	3.07555	3.08582	3.0475	3.00641	2.82458	3.05306	3.1372	2.79955	-0.495337	0.669853	0.756813	0.432476	0.0847671	-1.454	0.479561	1.19165	-1.66578	0.137686	0.147961	0.109636	0.0685484	-0.113281	0.1152	0.199344	-0.138306	1.10014	1.108	1.07896	1.04866	-1.08169	1.08312	1.14818
hsa-miR-1185-5p	105	0	0.217506	0.217506	0.199342	0	1	0.0431716	91.0871	93.0871	93.1598	93.1666	0.321476	8	57	0.954598	2.93786	3.07555	3.08582	3.0475	3.00641	2.82458	3.05306	3.1372	2.79955	-0.495337	0.669853	0.756813	0.432476	0.0847671	-1.454	0.479561	1.19165	-1.66578	0.137686	0.147961	0.109636	0.0685484	-0.113281	0.1152	0.199344	-0.138306	1.10014	1.108	1.07896	1.04866	-1.08169	1.08312	1.14818
hsa-miR-1199-5p	106	0	0.125154	0.125154	0.143296	0	1	0.2341	59.5845	61.5845	61.6572	61.6639	2.17778	8	57	0.0427639	2.97686	3.07555	3.08582	3.28643	3.55648	3.11733	3.05306	3.1372	2.79955	-0.689431	-0.217145	-0.167969	0.79209	2.08442	-0.0171943	-0.324755	0.0779303	-1.53794	0.0986881	0.108964	0.309576	0.579618	0.140469	0.0762021	0.160346	-0.177304	1.0708	1.07845	1.23934	1.49445	1.10226	1.05424	1.11756
hsa-miR-122-3p	107	0.00110229	0.229186	0.230288	0.207634	0.00478655	0.995213	0.0364627	94.3331	98.3331	98.5553	98.492	0.204871	8	57	0.98888	2.93829	3.07555	3.08582	3.0475	3.00641	2.90934	3.05505	3.14132	2.798	-0.638849	0.649237	0.745667	0.386009	0.000432072	-0.910512	0.45688	1.26652	-1.95538	0.137259	0.147535	0.10921	0.0681223	-0.0289486	0.116762	0.203037	-0.14029	1.09981	1.10768	1.07864	1.04835	-1.02027	1.0843	1.15112
hsa-miR-122-5p	108	0	2.88085	2.88085	10.9731	0	1	0.769775	238.353	240.353	240.426	240.433	23.823	8	57	1.47228e-15	4.51749	4.37375	4.22877	3.97094	4.92426	9.366	10.9373	12.3162	11.8189	-0.789347	-0.828932	-0.868859	-0.939864	-0.677323	0.545906	0.978622	1.35839	1.22141	-0.143738	-0.288719	-0.54655	0.406776	4.84851	6.41977	7.79875	7.30138	-1.10476	-1.22156	-1.46059	1.32572	28.8102	85.6135	222.668
hsa-miR-1226-3p	109	0	0.155667	0.155667	0.150123	0	1	0.0906951	72.0201	74.0201	74.0928	74.0995	0.710655	8	57	0.680989	2.93786	3.07555	3.08582	3.12769	3.25596	2.89183	3.05306	3.1372	2.79955	-0.731515	0.249744	0.322977	0.62136	1.5355	-1.05953	0.0894909	0.689171	-1.7172	0.137686	0.147961	0.189829	0.318097	-0.0460262	0.1152	0.199344	-0.138306	1.10014	1.108	1.14063	1.24669	-1.03242	1.08312	1.14818
hsa-miR-1246	110	0	0.5471	0.5471	0.690912	0	1	0.305607	143.664	145.664	145.737	145.744	3.13576	8	57	0.0052316	2.93786	3.07555	3.08582	3.0475	3.00641	2.82458	3.99959	4.51471	2.79955	-0.535397	-0.302675	-0.285307	-0.350086	-0.419534	-0.726869	1.25918	2.12985	-0.769167	0.137686	0.147961	0.109636	0.0685484	-0.113281	1.06173	1.57685	-0.138306	1.10014	1.108	1.07896	1.04866	-1.08169	2.08744	2.98317
hsa-miR-1249-3p	111	0	0.217506	0.217506	0.199342	0	1	0.0431716	91.0871	93.0871	93.1598	93.1666	0.321476	8	57	0.954598	2.93786	3.07555	3.08582	3.0475	3.00641	2.82458	3.05306	3.1372	2.79955	-0.495337	0.669853	0.756813	0.432476	0.0847671	-1.454	0.479561	1.19165	-1.66578	0.137686	0.147961	0.109636	0.0685484	-0.113281	0.1152	0.199344	-0.138306	1.10014	1.108	1.07896	1.04866	-1.08169	1.08312	1.14818
hsa-miR-1255a	112	0.24563	0.12973	0.37536	0.36622	0.654385	0.345615	0.72511	81.0542	85.0542	85.2764	85.2131	3.30191	8	57	0.00363803	4.06163	4.15355	3.99835	4.14697	4.01331	3.77725	3.67715	3.29249	3.35291	0.703848	0.983641	0.511212	0.963605	0.55675	-0.161777	-0.466481	-1.63737	-1.45343	0.0919188	-0.0632856	0.0853366	-0.0483253	-0.284379	-0.384481	-0.769146	-0.708719	1.06579	-1.04484	1.06094	-1.03406	-1.21789	-1.30539	-1.70426
hsa-miR-1255b-5p	113	0.103828	0.110938	0.214767	0.208848	0.483447	0.516553	0.584557	67.639	71.639	71.8612	71.7979	2.20923	8	57	0.0399399	4.12979	4.25042	4.03734	4.20689	4.2019	4.10725	3.8814	3.597	4.68405	0.0273317	0.438975	-0.28817	0.290449	0.273412	-0.0495842	-0.820322	-1.79088	1.91879	0.120624	-0.092452	0.0771018	0.0721093	-0.0225388	-0.24839	-0.532794	0.554258	1.08721	-1.06618	1.0549	1.05125	-1.01575	-1.18788	-1.44673
hsa-miR-125a-5p	114	0.212161	0.401749	0.61391	1.29243	0.345589	0.654411	0.754407	137.601	141.601	141.823	141.76	14.8918	8	57	1.66718e-11	4.0891	4.43848	4.0906	5.10352	5.10052	5.47949	6.29247	6.86961	6.49859	-1.19191	-0.85609	-1.19046	-0.216875	-0.219758	0.144502	0.925913	1.48064	1.12403	0.349384	0.00150728	1.01442	1.01142	1.39039	2.20337	2.78051	2.40949	1.27402	1.00105	2.02009	2.01589	2.6215	4.60555	6.87096
hsa-miR-125b-2-3p	115	0	0.217506	0.217506	0.199342	0	1	0.0431716	91.0871	93.0871	93.1598	93.1666	0.321476	8	57	0.954598	2.93786	3.07555	3.08582	3.0475	3.00641	2.82458	3.05306	3.1372	2.79955	-0.495337	0.669853	0.756813	0.432476	0.0847671	-1.454	0.479561	1.19165	-1.66578	0.137686	0.147961	0.109636	0.0685484	-0.113281	0.1152	0.199344	-0.138306	1.10014	1.108	1.07896	1.04866	-1.08169	1.08312	1.14818
hsa-miR-125b-5p	116	0.0786279	0.290131	0.368758	1.12622	0.213223	0.786777	0.793008	115.557	119.557	119.779	119.716	22.0561	8	57	7.46222e-15	4.61692	5.00196	4.57264	5.46084	6.01314	6.45626	6.74459	7.17941	6.85177	-1.26206	-0.876568	-1.3064	-0.41715	0.135797	0.579431	0.868101	1.30343	0.975411	0.385038	-0.0442894	0.843918	1.39622	1.83933	2.12766	2.56249	2.23485	1.30589	-1.03118	1.79492	2.63211	3.57844	4.37009	5.90726
hsa-miR-1260a	117	0.0265818	0.0990745	0.125656	0.188432	0.211544	0.788456	0.577413	54.265	58.265	58.4872	58.4239	6.16461	8	57	1.02228e-05	3.37052	3.23085	3.35729	4.01437	3.38803	3.00439	3.25331	3.26904	2.8772	0.200185	-0.241515	0.158324	2.2363	0.255549	-0.957677	-0.170495	-0.120751	-1.35992	-0.139671	-0.0132371	0.643847	0.0175068	-0.366131	-0.117214	-0.101484	-0.493327	-1.10165	-1.00922	1.56249	1.01221	-1.28889	-1.08464	-1.07288
hsa-miR-1260b	118	0.11206	0.263114	0.375174	0.697191	0.298688	0.701312	0.700381	112.289	116.289	116.511	116.448	11.0145	8	57	3.0666e-09	4.5274	4.07635	4.01182	5.29436	4.4144	3.60764	3.56887	3.11807	2.77651	0.77529	0.187144	0.10301	1.77536	0.627947	-0.424022	-0.474569	-1.06239	-1.50777	-0.451053	-0.515576	0.766964	-0.112998	-0.919761	-0.958525	-1.40933	-1.75089	-1.36704	-1.42957	1.70168	-1.08147	-1.8918	-1.94332	-2.65614
hsa-miR-1262	119	0.228446	0.237085	0.46553	0.646764	0.490721	0.509279	0.713426	111.107	115.107	115.329	115.266	8.70341	8	57	1.12722e-07	3.3311	3.54632	4.12763	4.06535	4.80976	4.32479	4.446	3.59182	4.35657	-1.51408	-1.07104	0.125652	-0.00255889	1.52987	0.531529	0.781048	-0.977364	0.596939	0.215215	0.796529	0.734248	1.47865	0.993691	1.1149	0.260719	1.02547	1.16088	1.73692	1.66353	2.78689	1.99127	2.1658	1.19808
hsa-miR-126-3p	120	0.0374479	0.0586096	0.0960575	0.104583	0.389849	0.610151	0.558928	28.9747	32.9747	33.197	33.1336	2.87541	8	57	0.00926509	12.6136	12.8297	12.6996	12.8586	12.6916	12.3927	12.6429	12.8174	12.3487	-0.227037	0.958122	0.244594	1.11614	0.200997	-1.43808	-0.0663514	0.890568	-1.67895	0.216175	0.0860264	0.244998	0.0780741	-0.220897	0.0293094	0.203853	-0.264832	1.16165	1.06144	1.18509	1.05561	-1.16546	1.02052	1.15177
hsa-miR-126-5p	121	0.0549535	0.0986892	0.153643	0.18051	0.357671	0.642329	0.568524	57.8822	61.8822	62.1045	62.0411	4.59365	8	57	0.000231931	8.9924	9.19392	9.26811	9.26736	9.16243	9.21195	9.63644	9.91529	9.35708	-1.22732	-0.503058	-0.236392	-0.239112	-0.616215	-0.438245	1.0874	2.08959	0.0833437	0.201517	0.275713	0.274957	0.170032	0.21955	0.644044	0.922891	0.364676	1.14991	1.21059	1.20996	1.12508	1.16437	1.5627	1.89591
hsa-miR-1268a	122	0	0.207197	0.207197	0.190464	0	1	0.0460357	88.3194	90.3194	90.3921	90.3988	0.343833	8	57	0.944842	2.93786	3.07555	3.08582	3.0475	3.03929	2.82458	3.05306	3.1372	2.79955	-0.522479	0.634355	0.720691	0.39868	0.329717	-1.47427	0.445428	1.15241	-1.68453	0.137686	0.147961	0.109636	0.101428	-0.113281	0.1152	0.199344	-0.138306	1.10014	1.108	1.07896	1.07283	-1.08169	1.08312	1.14818
hsa-miR-1271-5p	123	0.0124967	0.166395	0.178891	0.177294	0.0698563	0.930144	0.21479	79.1069	83.1069	83.3291	83.2658	1.00422	8	57	0.443155	3.45424	3.25769	3.21226	3.17957	3.21729	3.02745	3.34792	3.15131	2.84071	1.50662	0.395998	0.139309	-0.0454023	0.167748	-0.904977	0.905887	-0.205074	-1.96011	-0.196553	-0.24198	-0.27467	-0.236947	-0.426793	-0.106315	-0.302928	-0.613526	-1.14596	-1.18261	-1.20972	-1.1785	-1.34424	-1.07647	-1.23365
hsa-miR-1273c	124	0.00161005	0.236879	0.238489	0.214145	0.00675108	0.993249	0.0361266	96.3214	100.321	100.544	100.48	0.176104	8	57	0.993293	2.93844	3.07555	3.08582	3.0475	3.00641	2.94033	3.05604	3.14315	2.79761	-0.689472	0.62984	0.728719	0.359924	-0.0354479	-0.671317	0.442096	1.28034	-2.04468	0.137104	0.147379	0.109054	0.0679666	0.00188669	0.117593	0.204704	-0.140834	1.0997	1.10756	1.07852	1.04824	1.00131	1.08492	1.15245
hsa-miR-127-3p	125	0.128512	0.178548	0.30706	0.55676	0.418524	0.581476	0.748141	93.1728	97.1728	97.395	97.3317	11.8797	8	57	8.82344e-10	5.95327	5.79889	5.84609	5.86839	5.72028	4.87095	4.67832	5.12987	3.55091	0.8556	0.662696	0.72168	0.749545	0.564463	-0.496838	-0.737537	-0.17329	-2.14632	-0.154376	-0.107173	-0.0848736	-0.232989	-1.08232	-1.27495	-0.823394	-2.40236	-1.11294	-1.07712	-1.06059	-1.17527	-2.11744	-2.4199	-1.76956
hsa-miR-127-5p	126	0	0.217506	0.217506	0.199342	0	1	0.0431716	91.0871	93.0871	93.1598	93.1666	0.321476	8	57	0.954598	2.93786	3.07555	3.08582	3.0475	3.00641	2.82458	3.05306	3.1372	2.79955	-0.495337	0.669853	0.756813	0.432476	0.0847671	-1.454	0.479561	1.19165	-1.66578	0.137686	0.147961	0.109636	0.0685484	-0.113281	0.1152	0.199344	-0.138306	1.10014	1.108	1.07896	1.04866	-1.08169	1.08312	1.14818
hsa-miR-1277-3p	127	0	0.182489	0.182489	0.172068	0	1	0.0699681	81.0816	83.0816	83.1544	83.1611	0.536027	8	57	0.824456	2.93786	3.07555	3.08582	3.08038	3.13141	2.82458	3.05306	3.20296	2.79955	-0.605779	0.394539	0.469194	0.429626	0.800396	-1.4288	0.231173	1.32025	-1.61061	0.137686	0.147961	0.142515	0.193548	-0.113281	0.1152	0.265102	-0.138306	1.10014	1.108	1.10383	1.14357	-1.08169	1.08312	1.20172
hsa-miR-1277-5p	128	0.10402	0.155967	0.259987	0.328614	0.400097	0.599903	0.626739	85.0146	89.0146	89.2368	89.1734	5.32031	8	57	5.29633e-05	3.80708	4.42259	3.99851	4.23949	4.34221	4.71427	4.53692	4.67344	4.21173	-1.73114	0.316874	-1.09419	-0.292385	0.049394	1.28737	0.697289	1.15152	-0.384735	0.615511	0.191427	0.432404	0.535122	0.907185	0.729841	0.866356	0.404649	1.5321	1.14189	1.34948	1.44906	1.87538	1.65846	1.82305
hsa-miR-128-1-5p	129	0	0.217506	0.217506	0.199342	0	1	0.0431716	91.0871	93.0871	93.1598	93.1666	0.321476	8	57	0.954598	2.93786	3.07555	3.08582	3.0475	3.00641	2.82458	3.05306	3.1372	2.79955	-0.495337	0.669853	0.756813	0.432476	0.0847671	-1.454	0.479561	1.19165	-1.66578	0.137686	0.147961	0.109636	0.0685484	-0.113281	0.1152	0.199344	-0.138306	1.10014	1.108	1.07896	1.04866	-1.08169	1.08312	1.14818
hsa-miR-128-3p	130	0.0133975	0.0185336	0.0319312	0.0670926	0.419576	0.580424	0.783066	-35.9219	-31.9219	-31.6997	-31.7631	18.7288	8	57	2.08232e-13	10.0226	10.0436	9.84607	10.3962	10.3956	10.0063	9.90987	9.79336	9.60846	0.0773017	0.157822	-0.599875	1.51036	1.50813	0.0147764	-0.355182	-0.802053	-1.51128	0.0209921	-0.176544	0.373608	0.373025	-0.0163007	-0.112751	-0.229253	-0.414153	1.01466	-1.13017	1.29559	1.29507	-1.01136	-1.08129	-1.17223
hsa-miR-1285-3p	131	0	0.175823	0.175823	0.158227	0	1	0.025562	78.9603	80.9603	81.0331	81.0398	0.186907	8	57	0.991803	2.9631	3.07555	3.08582	3.0475	3.0236	2.94958	3.05306	3.1372	2.79955	-0.520354	0.60709	0.710114	0.325861	0.0862447	-0.655861	0.381644	1.22528	-2.16002	0.112451	0.122727	0.0844016	0.0605023	-0.0135155	0.0899655	0.17411	-0.16354	1.08106	1.08879	1.06025	1.04283	-1.00941	1.06434	1.12827
hsa-miR-1292-5p	132	0.00258872	0.219542	0.22213	0.200621	0.0116541	0.988346	0.0505288	92.2494	96.2494	96.4717	96.4083	0.223671	8	57	0.98519	2.96434	3.07555	3.08582	3.0475	3.00641	2.9364	3.19288	3.14635	3.06135	-1.13883	0.22208	0.347828	-0.121178	-0.623982	-1.48078	1.65797	1.08849	0.0483921	0.111209	0.121484	0.0831587	0.0420714	-0.0279425	0.228544	0.182009	0.0970154	1.08013	1.08785	1.05933	1.02959	-1.01956	1.17165	1.13446
hsa-miR-1294	133	0	0.198305	0.198305	0.182074	0	1	0.0449012	85.8192	87.8192	87.8919	87.8986	0.334961	8	57	0.948835	2.93786	3.07555	3.08582	3.0475	3.05372	2.84177	3.05306	3.1372	2.79955	-0.563314	0.617229	0.705335	0.376725	0.430113	-1.38724	0.42443	1.1459	-1.74918	0.137686	0.147961	0.109636	0.115862	-0.0960935	0.1152	0.199344	-0.138306	1.10014	1.108	1.07896	1.08362	-1.06888	1.08312	1.14818
hsa-miR-1296-5p	134	0.00252242	0.0945826	0.097105	0.122455	0.0259762	0.974024	0.337282	44.9735	48.9735	49.1957	49.1324	3.24351	8	57	0.00413287	4.05897	3.70572	3.86042	3.87762	4.26162	3.66581	4.01158	3.75647	3.53011	0.889841	-0.679732	0.00761779	0.0840534	1.79027	-0.857056	0.679262	-0.454219	-1.46004	-0.353248	-0.198553	-0.181351	0.20265	-0.393157	-0.047393	-0.302494	-0.528863	-1.27743	-1.14755	-1.13394	1.15081	-1.31326	-1.0334	-1.23327
hsa-miR-1301-3p	135	0	0.121795	0.121795	0.128029	0	1	0.16577	58.0338	60.0338	60.1066	60.1133	1.41581	8	57	0.209818	2.94703	3.07555	3.08582	3.33688	3.29665	2.95752	3.05306	3.1372	2.79955	-0.767085	-0.00615133	0.0546887	1.54118	1.30296	-0.704978	-0.139286	0.358915	-1.64024	0.128519	0.138794	0.389857	0.349623	0.0104896	0.106033	0.190177	-0.147473	1.09317	1.10098	1.31026	1.27423	1.0073	1.07626	1.1409
hsa-miR-1303	136	0.183012	0.143046	0.326059	0.438078	0.561286	0.438714	0.745645	84.0882	88.0882	88.3104	88.2471	11.2091	8	57	2.30684e-09	3.92046	3.92661	4.07616	3.43345	3.90044	4.58138	4.97021	4.71812	4.98488	-0.653054	-0.641862	-0.369515	-1.53992	-0.689506	0.550502	1.25857	0.799504	1.28528	0.00614594	0.155702	-0.487015	-0.0200176	0.660919	1.04975	0.797656	1.06442	1.00427	1.11396	-1.40154	-1.01397	1.58109	2.07017	1.73828
hsa-miR-1304-3p	137	0.943482	0.0974555	1.04094	0.877936	0.906377	0.0936229	0.914456	75.8078	79.8078	80.03	79.9667	6.42734	8	57	6.22279e-06	5.68967	5.80073	5.85412	5.6745	5.57609	5.4981	5.05966	4.83284	5.13659	0.641433	0.948978	1.0968	0.599437	0.326925	0.110956	-1.10316	-1.73125	-0.890128	0.111062	0.164446	-0.0151659	-0.113577	-0.191568	-0.630015	-0.856834	-0.553084	1.08002	1.12074	-1.01057	-1.08191	-1.142	-1.54758	-1.81106
hsa-miR-1304-5p	138	0.595595	0.0670228	0.662618	0.555519	0.898852	0.101148	0.90701	53.8776	57.8776	58.0999	58.0365	3.61609	8	57	0.00183867	4.30054	4.22107	4.29932	4.37125	4.28374	4.2677	3.93374	3.67959	4.03514	0.642959	0.292651	0.637556	0.954624	0.568906	0.498175	-0.973869	-2.09411	-0.526887	-0.0794739	-0.00122571	0.070707	-0.0168002	-0.0328469	-0.366807	-0.620956	-0.265401	-1.05663	-1.00085	1.05023	-1.01171	-1.02303	-1.2895	-1.53789
hsa-miR-1306-3p	139	0	0.145625	0.145625	0.132977	0	1	0.0396707	68.2193	70.2193	70.292	70.2987	0.29433	8	57	0.965064	2.97226	3.07555	3.08582	3.10818	3.11241	2.94501	3.05306	3.1372	2.79955	-0.552946	0.401213	0.496141	0.70264	0.741754	-0.804668	0.193484	0.970822	-2.14844	0.103285	0.11356	0.135913	0.140147	-0.0272481	0.0807986	0.164943	-0.172707	1.07422	1.08189	1.09879	1.10202	-1.01907	1.0576	1.12112
hsa-miR-1306-5p	140	0.0303097	0.254173	0.284483	0.314551	0.106543	0.893457	0.333721	104.645	108.645	108.868	108.804	2.22376	8	57	0.0386974	3.39359	3.42991	3.28751	3.77092	3.77213	3.10858	3.03104	3.14353	2.66816	0.294132	0.396763	-0.00557386	1.36025	1.36365	-0.511124	-0.730218	-0.412393	-1.75548	0.0363242	-0.106076	0.377333	0.378536	-0.285007	-0.362552	-0.250063	-0.725426	1.0255	-1.0763	1.29894	1.30002	-1.21842	-1.2857	-1.18926
hsa-miR-1307-3p	141	0.511232	0.0979926	0.609225	0.614518	0.839152	0.160848	0.876929	71.8706	75.8706	76.0928	76.0295	5.89126	8	57	1.72676e-05	7.62027	7.59781	7.40414	7.79501	7.80083	7.30627	7.07413	7.09591	6.47068	0.629941	0.577269	0.123055	1.03976	1.05341	-0.106487	-0.650914	-0.599834	-2.0662	-0.0224584	-0.216127	0.174741	0.180559	-0.314	-0.546134	-0.524355	-1.14959	-1.01569	-1.16161	1.12876	1.13332	-1.24315	-1.46017	-1.43829
hsa-miR-1307-5p	142	0.159824	0.178515	0.338339	0.371879	0.472377	0.527623	0.624322	94.4811	98.4811	98.7034	98.64	4.84741	8	57	0.000137601	4.0887	4.43346	4.24269	4.09941	4.56476	4.69438	5.09913	4.85248	4.71878	-1.27907	-0.285773	-0.835409	-1.24822	0.0925422	0.465996	1.63214	0.921501	0.536295	0.344756	0.153987	0.01071	0.476062	0.605681	1.01043	0.763778	0.63008	1.26994	1.11264	1.00745	1.39094	1.5217	2.01451	1.69793
hsa-miR-130a-3p	143	0.00805018	0.243025	0.251075	0.321023	0.0320629	0.967937	0.353186	99.0551	103.055	103.277	103.214	3.28202	8	57	0.00379939	3.45389	3.84118	3.69326	3.52345	3.40464	3.92726	3.89991	4.61108	4.39117	-0.984333	-0.0471125	-0.405079	-0.816011	-1.10352	0.161189	0.0950111	1.81601	1.28384	0.387288	0.239366	0.0695558	-0.0492505	0.473364	0.446018	1.15719	0.937279	1.30793	1.18047	1.04939	-1.03473	1.38834	1.36227	2.23022
hsa-miR-130b-3p	144	0.0816855	0.159441	0.241127	0.25403	0.338766	0.661234	0.503788	84.7539	88.7539	88.9761	88.9128	1.86272	8	57	0.0840935	3.84624	3.6308	3.84237	3.80729	3.86586	3.81636	4.39176	4.02068	3.43677	-0.0178744	-0.84351	-0.0327075	-0.167129	0.0573036	-0.132386	2.07274	0.650639	-1.58707	-0.215442	-0.00387054	-0.0389466	0.019617	-0.0298806	0.545525	0.174442	-0.409467	-1.16106	-1.00269	-1.02736	1.01369	-1.02093	1.45955	1.12853
hsa-miR-130b-5p	145	0	0.205847	0.205847	0.189743	0	1	0.0486483	87.9468	89.9468	90.0196	90.0263	0.364344	8	57	0.935009	2.93786	3.07555	3.08582	3.08038	3.03929	2.82458	3.05306	3.1372	2.79955	-0.543475	0.593075	0.677897	0.632941	0.293779	-1.47858	0.407461	1.10204	-1.68515	0.137686	0.147961	0.142515	0.101428	-0.113281	0.1152	0.199344	-0.138306	1.10014	1.108	1.10383	1.07283	-1.08169	1.08312	1.14818
hsa-miR-132-3p	146	0	0.131774	0.131774	0.136471	0	1	0.15326	62.5223	64.5223	64.5951	64.6018	1.28963	8	57	0.267288	3.29335	3.12561	3.31531	3.51679	3.46379	3.41501	3.54889	3.38358	2.79955	-0.105752	-0.82574	-0.0114805	0.853317	0.625847	0.416451	0.991116	0.281548	-2.22531	-0.167736	0.0219625	0.223435	0.170441	0.121658	0.255539	0.0902297	-0.493795	-1.12329	1.01534	1.16751	1.1254	1.08798	1.19378	1.06454
hsa-miR-132-5p	147	0	0.217506	0.217506	0.199342	0	1	0.0431716	91.0871	93.0871	93.1598	93.1666	0.321476	8	57	0.954598	2.93786	3.07555	3.08582	3.0475	3.00641	2.82458	3.05306	3.1372	2.79955	-0.495337	0.669853	0.756813	0.432476	0.0847671	-1.454	0.479561	1.19165	-1.66578	0.137686	0.147961	0.109636	0.0685484	-0.113281	0.1152	0.199344	-0.138306	1.10014	1.108	1.07896	1.04866	-1.08169	1.08312	1.14818
hsa-miR-133a-3p	148	0	0.363525	0.363525	0.380416	0	1	0.162013	120.364	122.364	122.436	122.443	1.37752	8	57	0.226029	2.93786	3.17124	3.08582	3.0475	3.19591	2.84177	3.41123	3.85517	2.79955	-0.651189	0.0666812	-0.19606	-0.313949	0.142575	-0.946774	0.804888	2.17045	-1.07662	0.233377	0.147961	0.109636	0.25805	-0.0960935	0.473366	0.917305	-0.138306	1.17558	1.108	1.07896	1.19586	-1.06888	1.38834	1.88858
hsa-miR-134-5p	149	0.203359	0.175057	0.378416	0.399362	0.537395	0.462605	0.658161	94.9871	98.9871	99.2093	99.146	3.41355	8	57	0.00285253	4.48425	4.51942	4.6235	4.695	4.24807	3.89558	4.35778	4.09682	3.39076	0.550934	0.636119	0.888221	1.06141	-0.0211416	-0.874927	0.244603	-0.38751	-2.0977	0.0351687	0.13925	0.210749	-0.236182	-0.588668	-0.126469	-0.387438	-1.09349	1.02468	1.10133	1.15729	-1.17787	-1.50386	-1.09162	-1.30807
hsa-miR-135a-5p	150	0	0.213492	0.213492	0.195878	0	1	0.0442191	90.0255	92.0255	92.0983	92.105	0.329637	8	57	0.951155	2.93786	3.07555	3.08582	3.0475	3.0236	2.82458	3.05306	3.1372	2.79955	-0.510115	0.651923	0.738647	0.415188	0.213482	-1.46619	0.462146	1.17231	-1.67739	0.137686	0.147961	0.109636	0.0857364	-0.113281	0.1152	0.199344	-0.138306	1.10014	1.108	1.07896	1.06123	-1.08169	1.08312	1.14818
hsa-miR-136-3p	151	0.00522789	0.210309	0.215537	0.20194	0.0242552	0.975745	0.105311	90.4386	94.4386	94.6608	94.5975	0.519941	8	57	0.83657	2.94074	3.16031	3.08582	3.0475	3.05372	2.82458	3.06188	3.24954	2.79609	-0.566432	0.919035	0.415121	0.155832	0.197958	-1.3523	0.253128	1.52273	-1.54507	0.219566	0.145083	0.106757	0.112984	-0.11616	0.121139	0.308798	-0.144652	1.16438	1.10579	1.07681	1.08146	-1.08385	1.08759	1.23868
hsa-miR-136-5p	152	0	0.217506	0.217506	0.199342	0	1	0.0431716	91.0871	93.0871	93.1598	93.1666	0.321476	8	57	0.954598	2.93786	3.07555	3.08582	3.0475	3.00641	2.82458	3.05306	3.1372	2.79955	-0.495337	0.669853	0.756813	0.432476	0.0847671	-1.454	0.479561	1.19165	-1.66578	0.137686	0.147961	0.109636	0.0685484	-0.113281	0.1152	0.199344	-0.138306	1.10014	1.108	1.07896	1.04866	-1.08169	1.08312	1.14818
hsa-miR-138-2-3p	153	0	0.136557	0.136557	0.134982	0	1	0.11284	64.5547	66.5547	66.6275	66.6342	0.906247	8	57	0.51785	3.00876	3.07555	3.15894	3.10818	3.31933	2.88526	3.05306	3.1372	2.79955	-0.339739	0.0975516	0.643604	0.311194	1.69376	-1.1484	-0.0496799	0.501272	-1.70956	0.0667854	0.150181	0.0994139	0.310567	-0.123503	0.0442994	0.128444	-0.209206	1.04738	1.10971	1.07134	1.24019	-1.08938	1.03118	1.09311
hsa-miR-138-5p	154	0.874713	0.13044	1.00515	0.966186	0.870228	0.129772	0.895879	89.8942	93.8942	94.1164	94.0531	1.61434	8	57	0.141041	4.30138	4.10859	4.18135	3.99738	3.79384	4.03886	4.00563	4.07986	3.7341	1.5528	0.462647	0.874082	-0.166258	-1.31719	0.0683261	-0.119602	0.300198	-1.655	-0.192785	-0.120026	-0.304001	-0.507534	-0.262517	-0.295751	-0.221512	-0.567274	-1.14297	-1.08675	-1.23456	-1.42162	-1.19957	-1.22752	-1.16596
hsa-miR-139-3p	155	0	0.203827	0.203827	0.188442	0	1	0.0514824	87.3847	89.3847	89.4574	89.4641	0.386722	8	57	0.923349	2.93786	3.07555	3.08582	3.10818	3.00641	2.82458	3.05306	3.1372	2.79955	-0.530359	0.588354	0.671845	0.853465	0.026606	-1.45078	0.405653	1.08934	-1.65411	0.137686	0.147961	0.170314	0.0685484	-0.113281	0.1152	0.199344	-0.138306	1.10014	1.108	1.1253	1.04866	-1.08169	1.08312	1.14818
hsa-miR-139-5p	156	0.00436436	0.197955	0.20232	0.19624	0.0215716	0.978428	0.131682	86.8556	90.8556	91.0778	91.0144	0.781723	8	57	0.62046	2.9401	3.14867	3.08582	3.26819	3.0236	2.82458	3.08247	3.21489	2.79942	-0.631407	0.647353	0.262043	1.38016	-0.119468	-1.33968	0.241499	1.0534	-1.49391	0.208567	0.145723	0.328089	0.0834979	-0.11552	0.142372	0.274795	-0.140675	1.15554	1.10628	1.25535	1.05958	-1.08337	1.10372	1.20982
hsa-miR-1-3p	157	0.0387924	0.661472	0.700264	0.994137	0.0553968	0.944603	0.439333	157.174	161.174	161.396	161.333	4.6841	8	57	0.000192402	3.47829	3.48161	3.38408	4.24195	4.13043	4.34083	4.81296	5.47758	2.74659	-0.640322	-0.636323	-0.753677	0.278499	0.144325	0.397468	0.965529	1.7652	-1.52069	0.00332377	-0.0942126	0.763658	0.652142	0.862536	1.33467	1.99929	-0.731702	1.00231	-1.06748	1.69779	1.5715	1.81823	2.52217	3.99804
hsa-miR-140-3p	158	0.014095	0.0507166	0.0648116	0.12657	0.217476	0.782524	0.678278	16.2652	20.2652	20.4874	20.4241	12.028	8	57	7.16393e-10	12.552	12.4259	12.5903	11.992	12.1936	12.6357	12.8963	12.951	12.87	-0.0474135	-0.435985	0.0706138	-1.7725	-1.15151	0.210294	1.01296	1.18155	0.931986	-0.126143	0.0383156	-0.56002	-0.358425	0.0836604	0.344233	0.398962	0.317946	-1.09137	1.02691	-1.47429	-1.28203	1.0597	1.26948	1.31856
hsa-miR-140-5p	159	0.0258031	0.12372	0.149523	0.17499	0.172569	0.827431	0.427437	65.7785	69.7785	70.0008	69.9374	2.78098	8	57	0.0114036	7.9008	8.158	7.85271	8.2276	8.34754	8.01932	7.79963	7.60397	7.78856	-0.27353	0.797878	-0.473825	1.08782	1.58745	0.220207	-0.694959	-1.50999	-0.741051	0.257203	-0.048083	0.326807	0.446749	0.118527	-0.101168	-0.296826	-0.112233	1.19516	-1.03389	1.25423	1.36297	1.08563	-1.07264	-1.22844
hsa-miR-141-3p	160	0	0.296589	0.296589	0.3601	0	1	0.27774	108.764	110.764	110.837	110.844	2.73987	8	57	0.0124829	2.99963	3.15341	3.19381	3.10818	3.21896	3.17369	3.81662	4.00022	4.28498	-0.942768	-0.612674	-0.52595	-0.70978	-0.471964	-0.569155	0.810936	1.20505	1.8163	0.153778	0.19418	0.10854	0.21933	0.174052	0.816984	1.00059	1.28535	1.11248	1.14407	1.07814	1.16419	1.12822	1.76172	2.00081
hsa-miR-141-5p	161	0.00228203	0.18474	0.187022	0.170701	0.0122019	0.987798	0.0614339	82.4403	86.4403	86.6625	86.5992	0.302831	8	57	0.961951	2.99797	3.07555	3.08582	3.0475	3.0236	2.84177	3.0565	3.14586	2.79663	-0.0863046	0.587063	0.676252	0.3436	0.136161	-1.44206	0.421772	1.19735	-1.83383	0.0775799	0.0878555	0.0495301	0.0256307	-0.156199	0.0585364	0.147892	-0.201335	1.05525	1.06279	1.03493	1.01792	-1.11435	1.04141	1.10795
hsa-miR-142-3p	162	0.0190184	0.165527	0.184546	0.180838	0.103055	0.896945	0.244349	80.074	84.074	84.2962	84.2329	0.89335	8	57	0.528137	13.8878	14.0937	13.9745	14.2291	14.2518	14.0945	13.9616	13.9157	14.1849	-1.29935	0.202505	-0.666602	1.1898	1.35477	0.208377	-0.760905	-1.09582	0.867227	0.205973	0.0867783	0.341375	0.364001	0.206778	0.0738451	0.0279125	0.297137	1.15346	1.062	1.26696	1.28699	1.15411	1.05252	1.01954
hsa-miR-142-5p	163	0.0117371	0.173761	0.185498	0.213478	0.0632737	0.936726	0.31688	81.3075	85.3075	85.5297	85.4664	2.39746	8	57	0.0264833	12.8222	13.0238	12.7965	13.0469	13.4403	13.2495	13.1791	12.765	12.691	-0.707329	0.0876232	-0.808539	0.178583	1.72972	0.977397	0.699822	-0.932897	-1.22438	0.201623	-0.0256698	0.224693	0.618107	0.427296	0.356895	-0.0572107	-0.131139	1.14999	-1.01795	1.16853	1.53486	1.34471	1.28067	-1.04045
hsa-miR-143-3p	164	0.502494	0.508183	1.01068	2.26407	0.497186	0.502814	0.824591	154.725	158.725	158.948	158.884	24.9336	8	57	5.55149e-16	3.31691	3.40574	3.70846	3.47274	3.79586	5.42279	6.55551	6.86673	7.17145	-0.940973	-0.886714	-0.701797	-0.845784	-0.648411	0.345395	1.03731	1.22742	1.41355	0.0888257	0.391548	0.15583	0.478945	2.10588	3.23859	3.54982	3.85453	1.0635	1.3118	1.11406	1.39372	4.3046	9.43873	11.7112
hsa-miR-144-3p	165	0.0845732	0.412268	0.496841	0.712808	0.170222	0.829778	0.531367	134.315	138.315	138.537	138.474	5.50462	8	57	3.67436e-05	9.26885	9.95615	9.57263	10.1447	10.486	10.744	10.4594	10.4697	10.357	-1.8561	-0.427881	-1.22483	-0.0359948	0.673119	1.20937	0.617964	0.639212	0.405149	0.687302	0.303785	0.875889	1.21714	1.47519	1.19059	1.20082	1.08818	1.61027	1.23438	1.83514	2.32485	2.78021	2.28247	2.2987
hsa-miR-144-5p	166	0.0272842	0.130223	0.157507	0.235377	0.173225	0.826775	0.552013	68.7186	72.7186	72.9408	72.8774	6.78154	8	57	3.22327e-06	11.5184	11.3122	11.531	11.3409	11.6052	11.5872	12.299	12.4552	12.0579	-0.541937	-1.03459	-0.511838	-0.966052	-0.334566	-0.377548	1.32307	1.69631	0.74715	-0.206184	0.0125967	-0.1775	0.0867882	0.0687995	0.78054	0.936744	0.539505	-1.15363	1.00877	-1.13092	1.062	1.04884	1.71777	1.9142
hsa-miR-145-5p	167	0	0.385712	0.385712	0.393705	0	1	0.14088	123.74	125.74	125.813	125.82	1.16837	8	57	0.334035	2.93786	3.07555	3.08582	3.0475	3.00641	2.82458	3.51398	3.69383	3.38452	-0.817805	-0.341874	-0.306355	-0.438832	-0.580857	-1.20938	1.17365	1.79532	0.72613	0.137686	0.147961	0.109636	0.0685484	-0.113281	0.576122	0.755971	0.446656	1.10014	1.108	1.07896	1.04866	-1.08169	1.49084	1.68877
hsa-miR-146a-5p	168	0	0.389681	0.389681	0.974254	0	1	0.649249	124.324	126.324	126.397	126.403	13.1886	8	57	1.47237e-10	9.20748	9.08771	9.20096	8.6955	8.70353	9.89685	10.9258	11.2521	10.8721	-0.547298	-0.665889	-0.553753	-1.05423	-1.04629	0.135271	1.15411	1.47717	1.1009	-0.119771	-0.00651866	-0.511979	-0.503957	0.689364	1.71835	2.04462	1.66461	-1.08656	-1.00453	-1.42601	-1.4181	1.61257	3.2906	4.12565
hsa-miR-146b-5p	169	0.318329	0.168851	0.48718	0.524846	0.653412	0.346588	0.750339	96.0489	100.049	100.271	100.208	4.10531	8	57	0.000645195	6.26448	6.06228	6.34977	5.76075	5.68259	6.08446	6.31345	6.73454	6.9949	0.0349977	-0.443623	0.236886	-1.15736	-1.34236	-0.391106	0.150922	1.14768	1.76396	-0.2022	0.0852907	-0.503727	-0.581884	-0.180013	0.048974	0.47007	0.730423	-1.15045	1.0609	-1.41787	-1.4968	-1.13289	1.03453	1.38518
hsa-miR-147b	170	0	0.200138	0.200138	0.184593	0	1	0.0492312	86.3436	88.3436	88.4164	88.4231	0.368936	8	57	0.932695	2.93786	3.07555	3.08582	3.0475	3.06709	2.82458	3.05306	3.1372	2.79955	-0.541619	0.600845	0.686109	0.368098	0.530658	-1.48159	0.414265	1.11246	-1.68923	0.137686	0.147961	0.109636	0.129227	-0.113281	0.1152	0.199344	-0.138306	1.10014	1.108	1.07896	1.09371	-1.08169	1.08312	1.14818
hsa-miR-148a-3p	171	0.0689563	0.0833439	0.1523	0.176427	0.452766	0.547234	0.629852	50.583	54.583	54.8052	54.7419	4.44617	8	57	0.000315106	11.0583	11.412	11.3393	11.5544	11.7337	11.4024	11.5362	11.4286	11.4201	-2.04541	-0.107876	-0.505993	0.672304	1.65492	-0.160096	0.572654	-0.0169213	-0.0635799	0.353636	0.280972	0.496033	0.675378	0.344104	0.477845	0.370237	0.361721	1.27778	1.21501	1.41033	1.59702	1.26936	1.39266	1.29256
hsa-miR-148a-5p	172	0	0.217506	0.217506	0.199342	0	1	0.0431716	91.0871	93.0871	93.1598	93.1666	0.321476	8	57	0.954598	2.93786	3.07555	3.08582	3.0475	3.00641	2.82458	3.05306	3.1372	2.79955	-0.495337	0.669853	0.756813	0.432476	0.0847671	-1.454	0.479561	1.19165	-1.66578	0.137686	0.147961	0.109636	0.0685484	-0.113281	0.1152	0.199344	-0.138306	1.10014	1.108	1.07896	1.04866	-1.08169	1.08312	1.14818
hsa-miR-148b-3p	173	0.0243584	0.0467497	0.0711081	0.0740399	0.342554	0.657446	0.500992	14.9173	18.9173	19.1395	19.0761	2.56088	8	57	0.0185037	9.26456	9.17082	9.27488	9.08294	9.5044	9.26394	9.4103	9.36554	9.42847	-0.321764	-1.02724	-0.244091	-1.68861	1.48314	-0.326424	0.775037	0.438177	0.911776	-0.0937422	0.010321	-0.181624	0.239832	-0.000619232	0.145741	0.100979	0.16391	-1.06713	1.00718	-1.13416	1.18086	-1.00043	1.1063	1.0725
hsa-miR-148b-5p	174	0.0135314	0.124576	0.138108	0.136241	0.0979774	0.902023	0.243762	63.6887	67.6887	67.9109	67.8476	1.02781	8	57	0.42618	4.11901	4.40135	3.99594	4.07075	4.27434	4.17872	4.1892	4.36469	4.10877	-0.519681	1.57074	-1.43085	-0.876971	0.630412	-0.0775389	2.9533e-05	1.29933	-0.595477	0.28234	-0.123066	-0.0482569	0.155336	0.0597174	0.0701941	0.245683	-0.0102372	1.21617	-1.08905	-1.03401	1.11368	1.04226	1.04986	1.18565
hsa-miR-149-5p	175	0.00309976	0.212504	0.215603	0.200668	0.0143771	0.985623	0.0832662	90.5337	94.5337	94.756	94.6926	0.455271	8	57	0.882061	2.93916	3.07555	3.08582	3.0475	3.00641	2.82458	3.19895	3.14685	2.79605	-0.540669	0.452193	0.526996	0.247998	-0.0511047	-1.37477	1.35053	0.971255	-1.58243	0.136388	0.146663	0.108338	0.0672506	-0.114579	0.259791	0.20769	-0.143105	1.09915	1.10701	1.07799	1.04772	-1.08266	1.19731	1.15484
hsa-miR-150-3p	176	0	0.126867	0.126867	0.138791	0	1	0.198418	60.3592	62.3592	62.4319	62.4386	1.76368	8	57	0.103576	2.98143	3.07555	3.08582	3.29568	3.36613	2.82458	3.05306	3.1372	2.79955	-0.462862	0.0358619	0.0903119	1.20236	1.57563	-1.294	-0.08329	0.362586	-1.4266	0.0941176	0.104393	0.314255	0.384699	-0.156849	0.0716317	0.155776	-0.181874	1.06741	1.07504	1.24337	1.30559	-1.11485	1.0509	1.11402
hsa-miR-150-5p	177	0.0316487	0.150607	0.182256	0.283318	0.173649	0.826351	0.569598	77.0209	81.0209	81.2431	81.1798	6.69956	8	57	3.74902e-06	9.33048	9.14987	9.09842	9.83557	9.69988	8.83884	8.83243	8.78794	8.78945	0.45003	-0.00392826	-0.133241	1.71955	1.37849	-0.785665	-0.801795	-0.913617	-0.909824	-0.180613	-0.232061	0.505092	0.3694	-0.491636	-0.498053	-0.542543	-0.541034	-1.13336	-1.17451	1.41921	1.29182	-1.40604	-1.41231	-1.45654
hsa-miR-151a-3p	178	0.0994456	0.0194923	0.118938	0.126756	0.836114	0.163886	0.881306	-20.3298	-16.3298	-16.1076	-16.1709	10.5114	8	57	6.48575e-09	8.46844	8.47442	8.52673	8.30464	8.32255	8.20526	8.1245	8.09117	7.73041	0.878254	0.902247	1.11236	0.220318	0.292246	-0.178865	-0.503258	-0.637135	-2.08617	0.0059734	0.0582843	-0.163801	-0.145893	-0.263181	-0.343943	-0.377273	-0.738027	1.00415	1.04123	-1.12023	-1.10642	-1.20012	-1.26922	-1.29888
hsa-miR-151b-151a-5p	179	0.12665	0.112597	0.239247	0.280156	0.529369	0.470631	0.686448	69.6301	73.6301	73.8523	73.7889	5.47828	8	57	3.87063e-05	4.64208	4.95927	4.69736	5.17792	4.98528	4.66337	4.40481	4.07826	4.37053	-0.0644454	0.854793	0.095768	1.48845	0.930164	-0.0027561	-0.752091	-1.69845	-0.851436	0.317189	0.0552826	0.535836	0.343196	0.0212863	-0.237276	-0.563822	-0.271556	1.2459	1.03906	1.44978	1.26856	1.01486	-1.17877	-1.47818
hsa-miR-152-3p	180	0.104667	0.246846	0.351512	0.692739	0.297762	0.702238	0.717071	108.627	112.627	112.849	112.786	13.4026	8	57	1.1097e-10	3.57189	3.75459	3.54999	3.71308	3.97821	4.3464	5.19052	5.73297	4.93156	-0.922902	-0.693742	-0.950369	-0.745817	-0.413267	0.0485541	1.10732	1.78771	0.782515	0.182701	-0.0218986	0.141183	0.406314	0.774508	1.61863	2.16107	1.35967	1.13501	-1.01529	1.10281	1.3253	1.71061	3.07083	4.47247
hsa-miR-1539	181	0	0.217506	0.217506	0.199342	0	1	0.0431716	91.0871	93.0871	93.1598	93.1666	0.321476	8	57	0.954598	2.93786	3.07555	3.08582	3.0475	3.00641	2.82458	3.05306	3.1372	2.79955	-0.495337	0.669853	0.756813	0.432476	0.0847671	-1.454	0.479561	1.19165	-1.66578	0.137686	0.147961	0.109636	0.0685484	-0.113281	0.1152	0.199344	-0.138306	1.10014	1.108	1.07896	1.04866	-1.08169	1.08312	1.14818
hsa-miR-154-5p	182	0.0180008	0.199407	0.217408	0.202489	0.0827977	0.917202	0.180732	89.9327	93.9327	94.1549	94.0916	0.540794	8	57	0.820814	2.98758	3.17124	3.17938	3.08038	3.05372	2.82458	3.08198	3.18532	2.80036	-0.365278	0.902352	0.958545	0.275202	0.0912398	-1.49036	0.286254	0.999536	-1.65749	0.183656	0.191797	0.0927936	0.0661409	-0.163003	0.0943948	0.197736	-0.187218	1.13576	1.14219	1.06643	1.04691	-1.11962	1.06762	1.1469
hsa-miR-155-5p	183	0.205966	0.0419656	0.247931	0.256957	0.830737	0.169263	0.873928	23.1152	27.1152	27.3375	27.2741	15.0981	8	57	1.29438e-11	9.16973	9.13444	9.17257	9.11421	8.84695	8.55384	8.45313	8.54266	8.58747	1.06091	0.946797	1.0701	0.881363	0.0170909	-0.930795	-1.25648	-0.966942	-0.822044	-0.0352872	0.0028399	-0.0555212	-0.322777	-0.615888	-0.716597	-0.627065	-0.582259	-1.02476	1.00197	-1.03923	-1.25074	-1.5325	-1.6433	-1.54442
hsa-miR-15a-3p	184	0	0.176339	0.176339	0.165411	0	1	0.0651429	79.1275	81.1275	81.2002	81.2069	0.496486	8	57	0.853701	2.93786	3.09273	3.08582	3.12062	3.1021	2.84177	3.0969	3.1372	2.79955	-0.66654	0.53409	0.480504	0.750244	0.606704	-1.41149	0.56638	0.878838	-1.73873	0.154873	0.147961	0.182756	0.16424	-0.0960935	0.159039	0.199344	-0.138306	1.11332	1.108	1.13505	1.12058	-1.06888	1.11654	1.14818
hsa-miR-15a-5p	185	0.0129403	0.0457976	0.0587378	0.0859141	0.220305	0.779695	0.572202	10.5298	14.5298	14.752	14.6886	7.19283	8	57	1.52599e-06	11.3653	11.4195	11.3812	11.4036	11.5164	11.754	11.8294	11.9667	11.9933	-1.00072	-0.792297	-0.939523	-0.853622	-0.419627	0.494362	0.784298	1.31251	1.41462	0.0541849	0.0159104	0.0382423	0.151068	0.388679	0.464054	0.601375	0.62792	1.03827	1.01109	1.02686	1.11039	1.30919	1.37941	1.51716
hsa-miR-15b-3p	186	0.0913	0.12519	0.21649	0.240895	0.421728	0.578272	0.591947	73.0147	77.0147	77.2369	77.1736	5.44483	8	57	4.13542e-05	7.93917	7.8911	8.11216	8.11485	8.20323	8.04579	8.62191	8.87986	9.16041	-0.869998	-0.977035	-0.484741	-0.478754	-0.281926	-0.632557	0.650454	1.22489	1.84967	-0.048064	0.172996	0.175685	0.264069	0.106621	0.682746	0.940691	1.22124	-1.03388	1.1274	1.1295	1.20086	1.0767	1.60519	1.91945
hsa-miR-15b-5p	187	0.00519657	0.0541251	0.0593217	0.0636977	0.0875998	0.9124	0.294478	15.7854	19.7854	20.0077	19.9443	1.6476	8	57	0.131754	13.1822	12.953	13.127	13.0687	13.1196	12.9929	12.9889	12.8072	12.9149	1.39192	-0.540991	0.92647	0.434597	0.863808	-0.20463	-0.238336	-1.77025	-0.862582	-0.229246	-0.0552026	-0.11354	-0.0626345	-0.189353	-0.19335	-0.375038	-0.267387	-1.17222	-1.039	-1.08188	-1.04437	-1.14025	-1.14342	-1.29687
hsa-miR-16-1-3p	188	0.000855668	0.176102	0.176957	0.204666	0.00483545	0.995165	0.248936	79.3179	83.3179	83.5402	83.4768	2.28375	8	57	0.0339562	3.65016	3.96659	3.62326	3.58553	3.87339	4.12673	4.20032	3.98385	3.47326	-0.703361	0.524296	-0.807746	-0.954106	0.162696	1.14557	1.43108	0.591258	-1.38969	0.316432	-0.0269055	-0.0646303	0.223228	0.476568	0.550158	0.333691	-0.176903	1.24525	-1.01882	-1.04582	1.16734	1.39143	1.46425	1.26023
hsa-miR-16-2-3p	189	0.0012744	0.017559	0.0188334	0.0207752	0.0676672	0.932333	0.292154	-49.1629	-45.1629	-44.9407	-45.0041	1.91812	8	57	0.0747644	8.80398	8.90826	8.78666	8.79795	8.76556	8.88637	8.9602	8.91044	8.94354	-0.791407	0.617596	-1.02549	-0.872947	-1.31059	0.321886	1.31946	0.647167	1.09432	0.104273	-0.0173232	-0.00603429	-0.0384216	0.0823888	0.156214	0.106461	0.139552	1.07495	-1.01208	-1.00419	-1.02699	1.05877	1.11436	1.07658
hsa-miR-16-5p	190	0.000776843	0.00416054	0.00493738	0.005992	0.157339	0.842661	0.435723	-128.059	-124.059	-123.837	-123.9	3.20655	8	57	0.0044806	18.8265	18.8688	18.8162	18.7588	18.7664	18.8484	18.8664	18.8229	18.9484	-0.1645	0.575071	-0.342921	-1.34553	-1.2127	0.218675	0.533075	-0.225985	1.96481	0.0423626	-0.01022	-0.067649	-0.060041	0.0219482	0.039957	-0.00352183	0.121967	1.0298	-1.00711	-1.04801	-1.0425	1.01533	1.02808	-1.00244
hsa-miR-17-3p	191	0.0564911	0.115476	0.171967	0.222627	0.3285	0.6715	0.589511	66.1069	70.1069	70.3291	70.2658	5.5008	8	57	3.70221e-05	6.93822	7.08905	7.08009	6.8684	7.33418	7.54164	7.54808	7.71739	7.66491	-1.14611	-0.680024	-0.707722	-1.36187	0.0774913	0.718582	0.73849	1.26167	1.0995	0.150827	0.141864	-0.0698204	0.395961	0.60342	0.609862	0.779164	0.726685	1.11021	1.10333	-1.04959	1.31582	1.51931	1.52611	1.71614
hsa-miR-17-5p	192	0.0150784	0.0545624	0.0696408	0.0758739	0.216517	0.783483	0.422519	20.4042	24.4042	24.6265	24.5631	2.36542	8	57	0.0284073	10.2212	10.3341	10.1436	10.3927	10.3258	10.1485	10.0892	9.88862	10.1988	0.181102	0.921181	-0.32774	1.30512	0.866399	-0.295656	-0.684628	-1.99998	0.0342033	0.112864	-0.0775998	0.171416	0.104509	-0.0727068	-0.132026	-0.332621	-0.0224024	1.08137	-1.05526	1.12616	1.07513	-1.05169	-1.09583	-1.2593
hsa-miR-181a-2-3p	193	0.169937	0.0534489	0.223386	0.21154	0.760732	0.239268	0.804596	33.9585	37.9585	38.1807	38.1174	2.27696	8	57	0.0344627	5.39491	5.31204	5.43998	5.27445	5.25339	5.08996	5.14259	5.16117	5.6182	0.579953	0.0813451	0.851171	-0.144821	-0.271574	-1.25491	-0.938217	-0.82643	1.92348	-0.0828676	0.0450758	-0.120456	-0.141522	-0.30495	-0.252317	-0.233738	0.223292	-1.05912	1.03174	-1.08708	-1.10307	-1.23538	-1.19112	-1.17588
hsa-miR-181a-3p	194	0.0204785	0.169227	0.189706	0.186394	0.107949	0.892051	0.251748	81.5095	85.5095	85.7317	85.6683	1.04894	8	57	0.411327	3.05938	3.18843	3.35724	3.16038	3.03929	2.84177	3.17773	3.2583	2.79683	-0.20758	0.491441	1.40593	0.339495	-0.31644	-1.38642	0.433477	0.86997	-1.62987	0.129042	0.297858	0.100992	-0.020096	-0.217617	0.118341	0.198919	-0.26256	1.09357	1.22932	1.07251	-1.01403	-1.16281	1.08549	1.14784
hsa-miR-181a-5p	195	0.0607642	0.073507	0.134271	0.195968	0.452548	0.547452	0.706087	43.4188	47.4188	47.641	47.5777	9.5978	8	57	2.65495e-08	9.69037	9.37005	9.65384	9.22604	9.32312	8.99866	9.11765	8.90042	8.29573	1.21434	0.459444	1.12825	0.120059	0.348857	-0.415803	-0.135385	-0.647342	-2.07242	-0.320319	-0.0365307	-0.464326	-0.367243	-0.691704	-0.572716	-0.78995	-1.39464	-1.24861	-1.02564	-1.37967	-1.28989	-1.61519	-1.48732	-1.72901
hsa-miR-181b-5p	196	0.0883205	0.0493176	0.137638	0.129676	0.641686	0.358314	0.704736	25.5608	29.5608	29.783	29.7196	1.57269	8	57	0.153513	6.35982	6.18389	6.2776	6.31638	6.13932	6.11009	6.21036	6.14184	5.9655	1.42365	-0.0462035	0.736725	1.0607	-0.418597	-0.662789	0.174922	-0.397554	-1.87085	-0.175927	-0.0822182	-0.0434418	-0.220499	-0.249727	-0.149461	-0.217981	-0.39432	-1.12969	-1.05864	-1.03057	-1.16514	-1.18898	-1.10915	-1.1631
hsa-miR-181c-3p	197	0	0.217506	0.217506	0.199342	0	1	0.0431716	91.0871	93.0871	93.1598	93.1666	0.321476	8	57	0.954598	2.93786	3.07555	3.08582	3.0475	3.00641	2.82458	3.05306	3.1372	2.79955	-0.495337	0.669853	0.756813	0.432476	0.0847671	-1.454	0.479561	1.19165	-1.66578	0.137686	0.147961	0.109636	0.0685484	-0.113281	0.1152	0.199344	-0.138306	1.10014	1.108	1.07896	1.04866	-1.08169	1.08312	1.14818
hsa-miR-181c-5p	198	0	0.213492	0.213492	0.195878	0	1	0.0442191	90.0255	92.0255	92.0983	92.105	0.329637	8	57	0.951155	2.93786	3.07555	3.08582	3.0475	3.0236	2.82458	3.05306	3.1372	2.79955	-0.510115	0.651923	0.738647	0.415188	0.213482	-1.46619	0.462146	1.17231	-1.67739	0.137686	0.147961	0.109636	0.0857364	-0.113281	0.1152	0.199344	-0.138306	1.10014	1.108	1.07896	1.06123	-1.08169	1.08312	1.14818
hsa-miR-181d-5p	199	0.000564744	0.189784	0.190349	0.177287	0.00296688	0.997033	0.0639451	83.4808	87.4808	87.703	87.6396	0.445367	8	57	0.888507	2.93812	3.07555	3.08582	3.12062	3.06709	2.82458	3.05393	3.13915	2.79871	-0.579457	0.505647	0.586781	0.861513	0.438858	-1.47593	0.334952	1.00785	-1.68021	0.137429	0.147704	0.182499	0.12897	-0.113538	0.11581	0.201033	-0.139411	1.09994	1.10781	1.13485	1.09351	-1.08188	1.08358	1.14952
hsa-miR-182-5p	200	0.171359	0.0579538	0.229313	0.219704	0.747272	0.252728	0.79592	38.0831	42.0831	42.3053	42.242	2.051	8	57	0.0562496	6.37163	6.47672	6.39201	6.51769	6.3797	6.26473	6.16423	6.13467	5.92804	0.422232	0.98062	0.530533	1.1983	0.465158	-0.145718	-0.679703	-0.836754	-1.93467	0.105094	0.0203832	0.146064	0.0080791	-0.106893	-0.207394	-0.236952	-0.44359	1.07556	1.01423	1.10655	1.00562	-1.07691	-1.1546	-1.1785
hsa-miR-1827	201	0	0.217506	0.217506	0.199342	0	1	0.0431716	91.0871	93.0871	93.1598	93.1666	0.321476	8	57	0.954598	2.93786	3.07555	3.08582	3.0475	3.00641	2.82458	3.05306	3.1372	2.79955	-0.495337	0.669853	0.756813	0.432476	0.0847671	-1.454	0.479561	1.19165	-1.66578	0.137686	0.147961	0.109636	0.0685484	-0.113281	0.1152	0.199344	-0.138306	1.10014	1.108	1.07896	1.04866	-1.08169	1.08312	1.14818
hsa-miR-183-5p	202	0.129892	0.0879978	0.21789	0.23382	0.596137	0.403863	0.707293	57.3106	61.3106	61.5328	61.4695	3.86092	8	57	0.00108586	5.83471	5.72563	5.80606	5.90367	5.80901	5.64285	5.25097	5.2835	5.31517	0.821739	0.406097	0.71257	1.08455	0.723831	0.0906428	-1.40267	-1.27872	-1.15804	-0.109073	-0.0286482	0.0689677	-0.0256931	-0.191855	-0.583732	-0.551204	-0.519536	-1.07854	-1.02006	1.04897	-1.01797	-1.14223	-1.49872	-1.46531
hsa-miR-185-3p	203	0.0150232	0.0903983	0.105422	0.102124	0.142506	0.857494	0.277951	46.945	50.945	51.1673	51.1039	0.947668	8	57	0.485489	3.20865	3.32342	3.25632	3.3	3.39529	3.09939	3.14111	3.10195	2.89509	0.115344	0.87604	0.431333	0.720848	1.3524	-0.608825	-0.332342	-0.591839	-1.96296	0.114769	0.0476744	0.0913547	0.186639	-0.109258	-0.067544	-0.106695	-0.313561	1.0828	1.0336	1.06537	1.13811	-1.07867	-1.04793	-1.07676
hsa-miR-185-5p	204	0.0229657	0.106912	0.129878	0.141795	0.176826	0.823174	0.389939	57.5852	61.5852	61.8074	61.744	2.1979	8	57	0.0409356	10.6547	10.8084	10.7265	10.6115	10.6543	11.0078	10.9115	10.3127	11.0365	-0.409529	0.271924	-0.09147	-0.601234	-0.411489	1.15553	0.728671	-1.92536	1.28295	0.153738	0.071755	-0.0432491	-0.000442226	0.353082	0.256781	-0.341974	0.381827	1.11245	1.05099	-1.03043	-1.00031	1.27729	1.19481	-1.26749
hsa-miR-186-3p	205	0	0.217506	0.217506	0.199342	0	1	0.0431716	91.0871	93.0871	93.1598	93.1666	0.321476	8	57	0.954598	2.93786	3.07555	3.08582	3.0475	3.00641	2.82458	3.05306	3.1372	2.79955	-0.495337	0.669853	0.756813	0.432476	0.0847671	-1.454	0.479561	1.19165	-1.66578	0.137686	0.147961	0.109636	0.0685484	-0.113281	0.1152	0.199344	-0.138306	1.10014	1.108	1.07896	1.04866	-1.08169	1.08312	1.14818
hsa-miR-186-5p	206	0.00674046	0.0386531	0.0453936	0.101709	0.148489	0.851511	0.690483	-1.28856	2.71144	2.93366	2.87032	13.0378	8	57	1.79994e-10	10.3686	10.1681	10.3233	9.72012	9.83254	9.79353	9.9869	10.0277	9.92461	1.53472	0.661374	1.33751	-1.28904	-0.799546	-0.969381	-0.127401	0.0503915	-0.398634	-0.200577	-0.0452916	-0.648519	-0.5361	-0.575105	-0.381731	-0.340899	-0.444024	-1.14916	-1.03189	-1.56756	-1.45005	-1.48979	-1.3029	-1.26655
hsa-miR-187-3p	207	0.140919	0.0598626	0.200782	0.268342	0.701852	0.298148	0.827166	38.4079	42.4079	42.6301	42.5668	14.0629	8	57	4.71653e-11	8.58105	8.39053	8.44615	8.23839	8.08536	7.8597	7.70564	7.69839	7.50199	1.37201	0.873814	1.01925	0.475986	0.0758364	-0.514233	-0.917057	-0.936018	-1.44959	-0.190525	-0.134905	-0.342667	-0.495697	-0.721358	-0.87541	-0.882661	-1.07907	-1.14118	-1.09802	-1.2681	-1.41	-1.64873	-1.83453	-1.84377
hsa-miR-187-5p	208	0	0.147511	0.147511	0.145474	0	1	0.1108	68.9527	70.9527	71.0254	71.0321	0.887819	8	57	0.532578	2.99223	3.07555	3.08582	3.25269	3.35733	3.02627	3.05306	3.1372	2.79955	-0.597606	-0.0701924	-0.00514298	1.0512	1.71361	-0.382128	-0.212538	0.320132	-1.81734	0.0833139	0.0935895	0.260457	0.365096	0.0340384	0.0608279	0.144972	-0.192678	1.05945	1.06702	1.19786	1.28797	1.02387	1.04306	1.10571
hsa-miR-188-5p	209	0	0.217505	0.217505	0.205557	0	1	0.0721024	91.087	93.087	93.1597	93.1664	0.553649	8	57	0.810881	2.93786	3.07555	3.08582	3.0475	3.03929	2.82458	3.05306	3.3492	2.79955	-0.52741	0.319525	0.382733	0.146984	0.0964952	-1.22423	0.181209	2.00286	-1.37816	0.137686	0.147961	0.109636	0.101428	-0.113281	0.1152	0.411343	-0.138306	1.10014	1.108	1.07896	1.07283	-1.08169	1.08312	1.32992
hsa-miR-18a-3p	210	0.0384373	0.136382	0.17482	0.195877	0.219869	0.780131	0.441187	72.7176	76.7176	76.9398	76.8764	2.83333	8	57	0.0101633	5.75465	5.67618	5.4065	5.52242	5.45989	5.12801	5.36678	5.243	4.89184	1.38399	1.09159	0.0866325	0.518606	0.285596	-0.951161	-0.0613912	-0.522642	-1.83122	-0.0784651	-0.348148	-0.232227	-0.294756	-0.626642	-0.387871	-0.511649	-0.862808	-1.05589	-1.27293	-1.17465	-1.22668	-1.54397	-1.30846	-1.42568
hsa-miR-18a-5p	211	0.0432048	0.11444	0.157645	0.170281	0.274063	0.725937	0.46485	64.1931	68.1931	68.4153	68.352	2.58153	8	57	0.0176828	7.39656	7.57857	7.30593	7.53558	7.55155	7.38635	7.1856	6.79275	7.09625	0.321443	1.03313	-0.0329264	0.865059	0.927497	0.281547	-0.503409	-2.03953	-0.852809	0.182011	-0.0906287	0.139028	0.154996	-0.0102034	-0.210953	-0.60381	-0.300311	1.13446	-1.06483	1.10116	1.11342	-1.0071	-1.15745	-1.51972
hsa-miR-18b-5p	212	0	0.217506	0.217506	0.199342	0	1	0.0431716	91.0871	93.0871	93.1598	93.1666	0.321476	8	57	0.954598	2.93786	3.07555	3.08582	3.0475	3.00641	2.82458	3.05306	3.1372	2.79955	-0.495337	0.669853	0.756813	0.432476	0.0847671	-1.454	0.479561	1.19165	-1.66578	0.137686	0.147961	0.109636	0.0685484	-0.113281	0.1152	0.199344	-0.138306	1.10014	1.108	1.07896	1.04866	-1.08169	1.08312	1.14818
hsa-miR-190a-3p	213	0	0.217506	0.217506	0.199342	0	1	0.0431716	91.0871	93.0871	93.1598	93.1666	0.321476	8	57	0.954598	2.93786	3.07555	3.08582	3.0475	3.00641	2.82458	3.05306	3.1372	2.79955	-0.495337	0.669853	0.756813	0.432476	0.0847671	-1.454	0.479561	1.19165	-1.66578	0.137686	0.147961	0.109636	0.0685484	-0.113281	0.1152	0.199344	-0.138306	1.10014	1.108	1.07896	1.04866	-1.08169	1.08312	1.14818
hsa-miR-190a-5p	214	0.920109	0.09384	1.01395	0.956215	0.907451	0.0925491	0.924375	73.7408	77.7408	77.963	77.8997	1.94742	8	57	0.0702381	9.00367	9.34724	9.11971	9.36637	9.3513	9.33839	9.09722	9.33139	9.21344	-1.73709	0.777908	-0.887609	0.917924	0.807617	0.713177	-1.0523	0.661908	-0.201533	0.34357	0.116046	0.362697	0.347628	0.334727	0.0935474	0.327723	0.20977	1.26889	1.08376	1.28583	1.27247	1.26114	1.06699	1.25503
hsa-miR-190b	215	0.179341	0.075625	0.254966	0.280133	0.703391	0.296609	0.790859	51.7797	55.7797	56.0019	55.9386	5.21647	8	57	6.5183e-05	5.9576	6.10583	5.89952	5.8973	5.9581	6.34939	6.32629	6.55398	6.86878	-0.754133	-0.316394	-0.925649	-0.932218	-0.752675	0.402834	0.33461	1.007	1.93662	0.148232	-0.0580806	-0.0603051	0.000493702	0.391786	0.368683	0.596377	0.911176	1.10821	-1.04108	-1.04269	1.00034	1.31202	1.29117	1.51191
hsa-miR-191-3p	216	0.0205861	0.116267	0.136853	0.131429	0.150425	0.849575	0.279865	61.5452	65.5452	65.7674	65.704	0.755481	8	57	0.642749	4.0936	4.05785	4.07163	4.12425	4.3605	4.09906	3.98386	4.18783	3.89126	-0.0234093	-0.297838	-0.192069	0.211896	2.02554	0.0184921	-0.865861	0.699992	-1.57674	-0.035747	-0.0219696	0.0306508	0.266895	0.00545806	-0.109738	0.0942301	-0.202337	-1.02509	-1.01534	1.02147	1.20322	1.00379	-1.07903	1.0675
hsa-miR-191-5p	217	0.0291896	0.0567245	0.0859141	0.10564	0.339753	0.660247	0.575524	25.8708	29.8708	30.093	30.0297	4.76596	8	57	0.000162583	13.8019	13.6564	13.6163	13.8556	13.8235	13.656	13.5397	13.1373	13.1192	0.810986	0.283033	0.137462	1.00595	0.889508	0.281448	-0.140685	-1.60091	-1.6668	-0.145458	-0.185564	0.0537162	0.0216339	-0.145894	-0.262197	-0.664507	-0.682659	-1.10608	-1.13726	1.03794	1.01511	-1.10642	-1.1993	-1.58503
hsa-miR-192-3p	218	0	0.217506	0.217506	0.199342	0	1	0.0431716	91.0871	93.0871	93.1598	93.1666	0.321476	8	57	0.954598	2.93786	3.07555	3.08582	3.0475	3.00641	2.82458	3.05306	3.1372	2.79955	-0.495337	0.669853	0.756813	0.432476	0.0847671	-1.454	0.479561	1.19165	-1.66578	0.137686	0.147961	0.109636	0.0685484	-0.113281	0.1152	0.199344	-0.138306	1.10014	1.108	1.07896	1.04866	-1.08169	1.08312	1.14818
hsa-miR-192-5p	219	0.55844	0.258918	0.817358	1.01546	0.683226	0.316774	0.802337	121.302	125.302	125.524	125.461	9.992	8	57	1.43364e-08	7.67979	7.68729	7.73258	7.58632	7.66342	8.58985	8.91904	9.33296	9.32345	-0.792956	-0.783044	-0.723146	-0.916573	-0.814609	0.410537	0.845871	1.39325	1.38067	0.00749531	0.0527888	-0.0934771	-0.0163739	0.910059	1.23925	1.65317	1.64366	1.00521	1.03727	-1.06694	-1.01141	1.87912	2.36076	3.14523
hsa-miR-193a-5p	220	0	0.24023	0.24023	0.23153	0	1	0.090126	96.7513	98.7513	98.824	98.8307	0.705754	8	57	0.685169	2.93786	3.07555	3.08582	3.0475	3.00641	2.85746	3.14074	3.48183	2.79955	-0.55911	0.139329	0.191455	-0.00295943	-0.211383	-0.966966	0.47003	2.2003	-1.2607	0.137686	0.147961	0.109636	0.0685484	-0.0804021	0.202878	0.543972	-0.138306	1.10014	1.108	1.07896	1.04866	-1.05731	1.15099	1.45798
hsa-miR-194-5p	221	0.628632	0.147455	0.776087	1.02967	0.810002	0.189998	0.889395	93.7863	97.7863	98.0085	97.9452	19.7355	8	57	7.3002e-14	6.54883	6.65923	6.69202	6.46179	6.55089	7.5434	7.96174	8.24862	8.38841	-0.847415	-0.709728	-0.668834	-0.955964	-0.844848	0.39294	0.91465	1.27244	1.44676	0.110404	0.143194	-0.0870397	0.00205781	0.994574	1.41291	1.69979	1.83958	1.07953	1.10435	-1.06219	1.00143	1.99249	2.66273	3.24855
hsa-miR-195-5p	222	0	0.0788227	0.0788227	0.0814601	0	1	0.151468	33.2307	35.2307	35.3035	35.3102	1.27186	8	57	0.276343	7.21529	7.32886	7.38016	7.19168	7.3502	7.31756	7.56314	7.46839	7.48885	-1.23104	-0.310221	0.105665	-1.42245	-0.137209	-0.401832	1.58916	0.821009	0.986916	0.113576	0.164872	-0.0236086	0.134915	0.102276	0.34785	0.253104	0.273568	1.08191	1.12107	-1.0165	1.09803	1.07347	1.27266	1.19177
hsa-miR-196a-5p	223	1.11832	0.0334447	1.15177	1.03583	0.970962	0.0290377	0.97515	23.4579	27.4579	27.6801	27.6168	2.78467	8	57	0.0113113	9.02319	9.03661	9.036	9.00162	8.94625	8.85935	8.68539	8.8577	8.77511	0.866509	0.972524	0.967704	0.6962	0.258873	-0.427426	-1.80125	-0.440415	-1.09271	0.0134237	0.0128134	-0.0215646	-0.0769392	-0.163839	-0.337794	-0.165483	-0.248078	1.00935	1.00892	-1.01506	-1.05478	-1.12026	-1.26382	-1.12154
hsa-miR-196b-5p	224	0.278512	0.0570716	0.335584	0.35181	0.829933	0.170067	0.874769	40.6013	44.6013	44.8236	44.7602	4.77351	8	57	0.000160086	6.37606	6.79598	6.44127	6.81521	6.81164	6.56022	6.43027	6.52804	6.38844	-1.05042	1.20188	-0.700661	1.30501	1.28585	-0.0626652	-0.759681	-0.235262	-0.98404	0.419923	0.0652104	0.439151	0.43558	0.18416	0.0542066	0.15198	0.0123767	1.33786	1.04624	1.35581	1.35245	1.13616	1.03829	1.11109
hsa-miR-1972	225	0	0.217506	0.217506	0.199342	0	1	0.0431716	91.0871	93.0871	93.1598	93.1666	0.321476	8	57	0.954598	2.93786	3.07555	3.08582	3.0475	3.00641	2.82458	3.05306	3.1372	2.79955	-0.495337	0.669853	0.756813	0.432476	0.0847671	-1.454	0.479561	1.19165	-1.66578	0.137686	0.147961	0.109636	0.0685484	-0.113281	0.1152	0.199344	-0.138306	1.10014	1.108	1.07896	1.04866	-1.08169	1.08312	1.14818
hsa-miR-197-3p	226	0.060639	0.101653	0.162292	0.266902	0.373641	0.626359	0.699839	59.964	63.964	64.1862	64.1229	10.0782	8	57	1.25496e-08	6.74605	6.50096	6.46701	7.22046	7.05206	6.59649	6.18297	6.03616	5.5441	0.510964	0.035036	-0.0308967	1.4322	1.1052	0.220546	-0.582453	-0.867539	-1.82306	-0.245088	-0.279041	0.47441	0.306013	-0.149556	-0.563075	-0.709886	-1.20195	-1.18516	-1.21339	1.38935	1.23629	-1.10923	-1.47742	-1.63568
hsa-miR-197-5p	227	0	0.217506	0.217506	0.199342	0	1	0.0431716	91.0871	93.0871	93.1598	93.1666	0.321476	8	57	0.954598	2.93786	3.07555	3.08582	3.0475	3.00641	2.82458	3.05306	3.1372	2.79955	-0.495337	0.669853	0.756813	0.432476	0.0847671	-1.454	0.479561	1.19165	-1.66578	0.137686	0.147961	0.109636	0.0685484	-0.113281	0.1152	0.199344	-0.138306	1.10014	1.108	1.07896	1.04866	-1.08169	1.08312	1.14818
hsa-miR-1976	228	0.0592759	0.129111	0.188386	0.205123	0.31465	0.68535	0.501164	72.1179	76.1179	76.3401	76.2768	2.33612	8	57	0.0302872	4.36856	4.11938	4.24853	4.12306	3.92879	3.96109	3.82491	3.87717	3.71048	1.65203	0.477786	1.0864	0.495096	-0.420403	-0.268164	-0.90991	-0.663655	-1.44918	-0.249176	-0.120026	-0.245503	-0.439773	-0.407468	-0.543648	-0.491392	-0.658081	-1.18853	-1.08675	-1.18551	-1.35639	-1.32636	-1.45765	-1.4058
hsa-miR-199a-3p	229	0.321709	0.357346	0.679055	1.21716	0.47376	0.52624	0.770253	134.075	138.075	138.297	138.234	14.7899	8	57	1.89099e-11	6.96691	7.2492	7.44678	7.39295	8.0109	8.53669	9.2621	9.4331	8.32196	-1.24174	-0.923666	-0.701045	-0.761699	-0.0654157	0.527025	1.34439	1.53707	0.285078	0.282289	0.479865	0.426035	1.04398	1.56977	2.29519	2.46618	1.35505	1.21612	1.39461	1.34354	2.06191	2.96858	4.90818	5.5258
hsa-miR-199a-5p	230	0	0.228907	0.228907	0.216902	0	1	0.0745449	93.9991	95.9991	96.0719	96.0786	0.573915	8	57	0.794916	2.93786	3.07555	3.1187	3.0475	3.0236	2.87189	3.0969	3.4048	2.79955	-0.59947	0.194504	0.44336	0.0327523	-0.105065	-0.979876	0.317638	2.09318	-1.39702	0.137686	0.180841	0.109636	0.0857364	-0.0659674	0.159039	0.466941	-0.138306	1.10014	1.13354	1.07896	1.06123	-1.04679	1.11654	1.38218
hsa-miR-199b-3p	231	0.229652	0.431123	0.660775	1.12869	0.347549	0.652451	0.698271	141.672	145.672	145.895	145.831	10.9323	8	57	3.46166e-09	3.5743	3.81202	4.07551	4.11316	4.55601	5.02612	5.68245	6.03288	5.15857	-1.28023	-1.0025	-0.694675	-0.650686	-0.133303	0.415924	1.18271	1.59211	0.570657	0.237724	0.501208	0.53886	0.981714	1.45182	2.10815	2.45858	1.58427	1.17913	1.4154	1.45282	1.97481	2.73554	4.31139	5.49676
hsa-miR-199b-5p	232	0.348022	0.282235	0.630258	0.828867	0.552191	0.447809	0.734646	122.589	126.589	126.812	126.748	10.4463	8	57	7.15482e-09	3.36733	3.57433	4.1856	3.52098	4.3196	4.47093	5.27939	4.48473	5.12553	-1.30974	-1.00558	-0.107426	-1.08397	0.0894627	0.311815	1.49972	0.33209	1.27364	0.207004	0.818271	0.153654	0.95227	1.1036	1.91206	1.1174	1.75819	1.15429	1.76329	1.11238	1.93491	2.1489	3.76347	2.16955
hsa-miR-19a-3p	233	0.110117	0.175698	0.285815	0.573951	0.385275	0.614725	0.758978	91.4409	95.4409	95.6631	95.5997	16.3455	8	57	2.92925e-12	8.40415	8.45557	8.50866	8.28894	8.55476	9.32298	9.86206	10.1262	10.0351	-0.853859	-0.78713	-0.718228	-1.00339	-0.658394	0.338654	1.03831	1.38118	1.26285	0.0514142	0.104504	-0.11521	0.150605	0.918827	1.45791	1.72209	1.63092	1.03628	1.07512	-1.08313	1.11003	1.89058	2.7471	3.29914
hsa-miR-19b-1-5p	234	0	0.207197	0.207197	0.190464	0	1	0.0460357	88.3194	90.3194	90.3921	90.3988	0.343833	8	57	0.944842	2.93786	3.07555	3.08582	3.0475	3.03929	2.82458	3.05306	3.1372	2.79955	-0.522479	0.634355	0.720691	0.39868	0.329717	-1.47427	0.445428	1.15241	-1.68453	0.137686	0.147961	0.109636	0.101428	-0.113281	0.1152	0.199344	-0.138306	1.10014	1.108	1.07896	1.07283	-1.08169	1.08312	1.14818
hsa-miR-19b-3p	235	0.0840938	0.122988	0.207082	0.359149	0.40609	0.59391	0.730811	71.6206	75.6206	75.8428	75.7794	13.6828	8	57	7.69483e-11	11.209	11.083	11.2819	10.7934	10.9914	11.6076	12.1947	12.3429	12.3521	-0.541521	-0.747915	-0.422018	-1.22246	-0.89804	0.111435	1.07326	1.31615	1.33111	-0.125983	0.072945	-0.415645	-0.21762	0.398566	0.985664	1.13392	1.14306	-1.09125	1.05186	-1.3339	-1.16281	1.3182	1.98023	2.19455
hsa-miR-200a-3p	236	0	0.217506	0.217506	0.199342	0	1	0.0431716	91.0871	93.0871	93.1598	93.1666	0.321476	8	57	0.954598	2.93786	3.07555	3.08582	3.0475	3.00641	2.82458	3.05306	3.1372	2.79955	-0.495337	0.669853	0.756813	0.432476	0.0847671	-1.454	0.479561	1.19165	-1.66578	0.137686	0.147961	0.109636	0.0685484	-0.113281	0.1152	0.199344	-0.138306	1.10014	1.108	1.07896	1.04866	-1.08169	1.08312	1.14818
hsa-miR-200b-3p	237	0.0447736	0.179675	0.224449	0.201429	0.199482	0.800518	0.281515	87.8486	91.8486	92.0708	92.0074	0.340416	8	57	0.946399	3.19896	3.18843	3.10301	3.20687	3.11391	2.96759	3.17619	3.25524	2.86669	0.627878	0.54447	-0.131775	0.690511	-0.0455151	-1.20394	0.447623	1.07347	-2.00272	-0.0105351	-0.0959513	0.00791113	-0.0850558	-0.231376	-0.0227679	0.0562829	-0.332269	-1.00733	-1.06877	1.0055	-1.06073	-1.17395	-1.01591	1.03978
hsa-miR-200c-3p	238	0.0340586	0.100204	0.134263	0.143367	0.253672	0.746328	0.441937	56.0776	60.0776	60.2998	60.2365	2.18558	8	57	0.0420457	3.37895	3.54151	3.50768	3.54385	3.81089	3.35988	3.21605	3.29408	3.28895	-0.322753	0.566042	0.381101	0.578855	2.03892	-0.427048	-1.21348	-0.786798	-0.814839	0.162555	0.128731	0.164899	0.431936	-0.0190748	-0.162909	-0.0848708	-0.0899995	1.11927	1.09333	1.12109	1.34904	-1.01331	-1.11954	-1.06059
hsa-miR-202-3p	239	0.00402827	0.185545	0.189573	0.170992	0.0212492	0.978751	0.0657166	83.1491	87.1491	87.3713	87.308	0.221494	8	57	0.985651	3.00812	3.07555	3.08582	3.0475	3.00641	2.89034	3.06016	3.15123	2.79588	-0.0491345	0.572952	0.667754	0.314167	-0.0649013	-1.13576	0.430968	1.27118	-2.00722	0.0674282	0.0777038	0.0393783	-0.00170896	-0.11778	0.0520385	0.143109	-0.212237	1.04785	1.05534	1.02767	-1.00119	-1.08506	1.03673	1.10428
hsa-miR-204-5p	240	0.0560926	0.210205	0.266297	0.239517	0.210639	0.789361	0.294524	97.1151	101.115	101.337	101.274	0.32681	8	57	0.952363	3.06134	3.16031	3.08582	3.14319	3.07091	2.8977	3.13394	3.25239	2.82555	-0.0662725	0.680146	0.118372	0.551045	0.00591033	-1.3005	0.48127	1.37467	-1.84464	0.0989646	0.0244813	0.0818477	0.00957044	-0.163641	0.0725965	0.191048	-0.235786	1.071	1.01711	1.05837	1.00666	-1.12011	1.05161	1.14159
hsa-miR-206	241	0.00446226	0.443821	0.448283	0.519019	0.00995412	0.990046	0.256985	132.281	136.281	136.503	136.44	2.33106	8	57	0.0306237	3.21765	3.25863	3.1987	3.56588	3.67663	3.50322	4.26002	4.14481	2.79679	-0.632642	-0.545048	-0.673159	0.111766	0.348538	-0.0221804	1.59567	1.34939	-1.53234	0.0409752	-0.0189529	0.348221	0.458978	0.285563	1.04237	0.927158	-0.420861	1.02881	-1.01322	1.27299	1.37457	1.21889	2.0596	1.90153
hsa-miR-20a-3p	242	0.0553883	0.186564	0.241952	0.236152	0.228923	0.771077	0.366876	90.8297	94.8297	95.0519	94.9886	1.40136	8	57	0.215813	3.47824	3.49329	3.70175	3.52313	3.54266	3.13883	3.56157	3.91865	3.66354	-0.381379	-0.30935	0.687854	-0.16664	-0.0731963	-2.00502	0.0172501	1.72543	0.505049	0.0150571	0.223515	0.0448897	0.0644232	-0.339409	0.0833303	0.440412	0.185301	1.01049	1.16757	1.0316	1.04567	-1.26524	1.05946	1.35699
hsa-miR-20a-5p	243	0.0312663	0.057835	0.0891012	0.0859625	0.350907	0.649093	0.468708	27.2544	31.2544	31.4766	31.4133	0.914856	8	57	0.511038	12.2205	12.1919	12.0913	12.2156	12.2079	12.3586	12.3026	12.384	12.2549	-0.299919	-0.616895	-1.7345	-0.353976	-0.439515	1.23427	0.612029	1.51581	0.0826958	-0.028545	-0.12919	-0.00486804	-0.0125712	0.13816	0.0821244	0.163513	0.0344559	-1.01998	-1.09368	-1.00338	-1.00875	1.1005	1.05858	1.12001
hsa-miR-20b-5p	244	0.183247	0.0968555	0.280102	0.290691	0.654214	0.345786	0.74144	64.3919	68.3919	68.6141	68.5508	4.68908	8	57	0.000190435	4.41872	4.38654	4.04339	4.18608	4.00705	4.36108	4.6738	4.74503	5.13426	-0.0575314	-0.146425	-1.09431	-0.700156	-1.19469	-0.216771	0.647071	0.843828	1.91898	-0.0321812	-0.375333	-0.232642	-0.411671	-0.0576476	0.255079	0.326308	0.715534	-1.02256	-1.29714	-1.17498	-1.33023	-1.04077	1.1934	1.2538
hsa-miR-210-3p	245	0.0563836	0.0578876	0.114271	0.188825	0.493419	0.506581	0.760372	30.8087	34.8087	35.0309	34.9676	11.8862	8	57	8.74317e-10	8.65535	8.36826	8.52652	7.8361	7.90182	8.15215	8.27823	8.33196	8.19555	1.52382	0.445752	1.04004	-1.55254	-1.30574	-0.365741	0.107711	0.309472	-0.202775	-0.287096	-0.128833	-0.819254	-0.753528	-0.503202	-0.377118	-0.323388	-0.459803	-1.22018	-1.09341	-1.76449	-1.68591	-1.41736	-1.29875	-1.25127
hsa-miR-21-3p	246	0	0.248447	0.248447	0.394888	0	1	0.448277	98.6683	100.668	100.741	100.748	5.78909	8	57	2.10483e-05	3.00453	3.10843	3.21439	3.06468	3.08428	3.10796	4.04573	4.37176	4.23251	-0.820021	-0.63717	-0.450678	-0.71415	-0.679672	-0.637989	1.01239	1.58618	1.34111	0.103898	0.209866	0.060157	0.0797481	0.103433	1.0412	1.36724	1.22799	1.07467	1.15658	1.04258	1.05683	1.07433	2.05794	2.57976
hsa-miR-215-5p	247	0	0.444013	0.444013	0.663023	0	1	0.412742	131.764	133.764	133.837	133.843	5.00766	8	57	9.93003e-05	3.1445	3.07555	3.08582	3.09481	3.24429	3.62302	4.06449	4.98381	4.47763	-0.704942	-0.802299	-0.78779	-0.775099	-0.564043	-0.0292947	0.594039	1.89207	1.17736	-0.0689525	-0.0586769	-0.0496884	0.0997901	0.478522	0.919992	1.83931	1.33313	-1.04895	-1.04151	-1.03504	1.07162	1.39332	1.89211	3.57839
hsa-miR-21-5p	248	0.0489035	0.119331	0.168235	0.277735	0.290686	0.709314	0.658571	67.0128	71.0128	71.2351	71.1717	10.0946	8	57	1.22362e-08	11.5998	11.7076	11.7344	11.752	11.8303	12.1205	12.5804	12.8919	12.8951	-0.994818	-0.790221	-0.739215	-0.705728	-0.557007	-0.00586195	0.867761	1.45947	1.46562	0.107707	0.134558	0.152187	0.230478	0.520619	0.980523	1.29202	1.29526	1.07751	1.09776	1.11125	1.17322	1.43457	1.97318	2.4487
hsa-miR-219a-5p	249	0.0301178	0.178998	0.209116	0.195984	0.144024	0.855976	0.255288	85.934	89.934	90.1562	90.0929	0.626226	8	57	0.752306	3.03955	3.13622	3.35178	3.12062	3.1486	2.98396	3.09582	3.30016	2.82671	-0.45706	0.15715	1.52662	0.0579885	0.235757	-0.810267	-0.0995346	1.19867	-1.80932	0.0966754	0.312227	0.0810675	0.109048	-0.055594	0.0562737	0.260608	-0.212843	1.06931	1.24162	1.0578	1.07852	-1.03929	1.03978	1.19798
hsa-miR-219b-5p	250	0	0.217506	0.217506	0.199342	0	1	0.0431716	91.0871	93.0871	93.1598	93.1666	0.321476	8	57	0.954598	2.93786	3.07555	3.08582	3.0475	3.00641	2.82458	3.05306	3.1372	2.79955	-0.495337	0.669853	0.756813	0.432476	0.0847671	-1.454	0.479561	1.19165	-1.66578	0.137686	0.147961	0.109636	0.0685484	-0.113281	0.1152	0.199344	-0.138306	1.10014	1.108	1.07896	1.04866	-1.08169	1.08312	1.14818
hsa-miR-221-3p	251	0.00445354	0.0363665	0.0408201	0.056238	0.109102	0.890898	0.467266	-6.0923	-2.0923	-1.87008	-1.93342	4.69597	8	57	0.000187753	12.2078	12.0089	12.0878	11.8628	11.8617	11.8068	12.0212	12.0294	11.7699	1.70067	0.325728	0.871082	-0.68446	-0.692182	-1.07174	0.410428	0.467105	-1.32664	-0.198884	-0.119999	-0.345006	-0.346123	-0.401025	-0.186632	-0.178434	-0.437896	-1.14781	-1.08673	-1.27016	-1.27114	-1.32045	-1.1381	-1.13165
hsa-miR-221-5p	252	0.0217195	0.0823727	0.104092	0.11725	0.208657	0.791343	0.435068	43.6592	47.6592	47.8814	47.8181	2.89334	8	57	0.00890694	4.91643	4.73299	4.90738	4.45945	4.82141	4.64853	5.00266	5.04762	4.76704	0.569858	-0.426376	0.520691	-1.91196	0.0538255	-0.885085	1.03815	1.28236	-0.241462	-0.183439	-0.00905322	-0.456982	-0.0950181	-0.267902	0.086227	0.131194	-0.14939	-1.13559	-1.00629	-1.37267	-1.06808	-1.20406	1.06159	1.0952
hsa-miR-222-3p	253	0.0993905	0.0471716	0.146562	0.14074	0.678146	0.321854	0.740124	24.0928	28.0928	28.3151	28.2517	1.28524	8	57	0.2695	8.11595	7.95666	7.96411	8.1505	8.10949	7.98427	8.16363	7.9429	7.8682	0.817926	-0.670414	-0.600821	1.14075	0.757552	-0.412427	1.26335	-0.798989	-1.49693	-0.159295	-0.151847	0.0345518	-0.00646174	-0.131683	0.0476736	-0.173056	-0.247757	-1.11674	-1.11099	1.02424	-1.00449	-1.09557	1.0336	-1.12744
hsa-miR-223-3p	254	0.176542	0.122474	0.299016	0.396458	0.590411	0.409589	0.759675	76.0011	80.0011	80.2233	80.16	9.60289	8	57	2.6337e-08	12.3975	12.5657	12.9602	13.1259	13.5537	13.0944	13.1894	12.8191	12.6425	-1.47474	-1.00672	0.0907379	0.551726	1.74161	0.464079	0.728246	-0.30184	-0.793095	0.168243	0.562755	0.72847	1.15621	0.696962	0.791925	0.421632	0.245037	1.12369	1.47709	1.65688	2.22871	1.62109	1.73138	1.33944
hsa-miR-223-5p	255	0.100539	0.144571	0.24511	0.516009	0.41018	0.58982	0.779831	80.9365	84.9365	85.1588	85.0954	19.1846	8	57	1.28943e-13	5.18808	5.32985	5.65564	5.57565	5.85613	6.01471	6.79821	6.99241	7.63528	-1.10909	-0.939681	-0.550372	-0.645963	-0.310794	-0.121296	0.814959	1.04701	1.81522	0.14177	0.467562	0.387567	0.668051	0.826632	1.61013	1.80433	2.4472	1.10326	1.38277	1.30819	1.58892	1.77354	3.0528	3.49266
hsa-miR-22-3p	256	0.0531327	0.066245	0.119378	0.157297	0.445081	0.554919	0.669847	37.3068	41.3068	41.529	41.4657	5.93586	8	57	1.58436e-05	8.30858	8.3077	8.29037	8.2293	8.29263	8.51304	8.84154	8.97205	8.78081	-0.684415	-0.687522	-0.748189	-0.962078	-0.740304	0.0316448	1.18216	1.63923	0.969466	-0.000887362	-0.0182095	-0.0792805	-0.0159579	0.204455	0.53296	0.663465	0.472229	-1.00062	-1.0127	-1.05649	-1.01112	1.15225	1.44689	1.58388
hsa-miR-22-5p	257	0.0271775	0.151112	0.178289	0.177457	0.152435	0.847565	0.307154	76.551	80.551	80.7732	80.7099	0.988532	8	57	0.454671	3.6693	3.59649	3.52072	3.76585	3.70381	3.77145	4.05569	3.79052	3.72655	-0.428804	-0.916047	-1.42309	0.217306	-0.19783	0.254788	2.15689	0.382427	-0.0456408	-0.072811	-0.148581	0.0965513	0.0345155	0.102152	0.386393	0.121226	0.0572579	-1.05176	-1.10848	1.06921	1.02421	1.07337	1.30712	1.08766
hsa-miR-2277-3p	258	0	0.153035	0.153035	0.14943	0	1	0.101922	71.0484	73.0484	73.1211	73.1278	0.808613	8	57	0.597786	3.1898	3.07555	3.10301	3.45831	3.19866	3.22375	3.07598	3.1372	2.79955	0.286466	-0.373454	-0.214823	1.8374	0.337682	0.482598	-0.370963	-0.0173129	-1.96759	-0.114251	-0.0867875	0.268512	0.00886698	0.0339561	-0.11382	-0.0525928	-0.390243	-1.08241	-1.062	1.20456	1.00617	1.02382	-1.08209	-1.03713
hsa-miR-23a-3p	259	0.0286079	0.10446	0.133068	0.225693	0.214987	0.785013	0.628226	57.3802	61.3802	61.6025	61.5391	9.14418	8	57	5.4809e-08	8.80204	8.76624	8.96374	8.97751	9.23441	9.26921	9.88169	9.65201	9.40271	-1.08619	-1.17999	-0.662545	-0.626459	0.0466252	0.137797	1.74249	1.14073	0.487558	-0.0358026	0.161698	0.175471	0.432374	0.467173	1.07965	0.849971	0.60067	-1.02513	1.1186	1.12933	1.34945	1.3824	2.11353	1.80246
hsa-miR-23b-3p	260	0.00763701	0.0821021	0.0897391	0.198204	0.0851023	0.914898	0.655715	39.4403	43.4403	43.6625	43.5992	11.9041	8	57	8.52518e-10	8.33582	8.18698	8.24204	8.39092	8.4926	8.62173	9.26223	9.28606	8.85227	-0.70619	-1.0634	-0.931248	-0.573951	-0.32992	-0.0200202	1.51714	1.57433	0.533255	-0.148839	-0.0937765	0.0551008	0.156783	0.285911	0.926408	0.950242	0.516448	-1.10868	-1.06716	1.03893	1.1148	1.21918	1.90054	1.9322
hsa-miR-23b-5p	261	0	0.217506	0.217506	0.199342	0	1	0.0431716	91.0871	93.0871	93.1598	93.1666	0.321476	8	57	0.954598	2.93786	3.07555	3.08582	3.0475	3.00641	2.82458	3.05306	3.1372	2.79955	-0.495337	0.669853	0.756813	0.432476	0.0847671	-1.454	0.479561	1.19165	-1.66578	0.137686	0.147961	0.109636	0.0685484	-0.113281	0.1152	0.199344	-0.138306	1.10014	1.108	1.07896	1.04866	-1.08169	1.08312	1.14818
hsa-miR-23c	262	0	0.217506	0.217506	0.199342	0	1	0.0431716	91.0871	93.0871	93.1598	93.1666	0.321476	8	57	0.954598	2.93786	3.07555	3.08582	3.0475	3.00641	2.82458	3.05306	3.1372	2.79955	-0.495337	0.669853	0.756813	0.432476	0.0847671	-1.454	0.479561	1.19165	-1.66578	0.137686	0.147961	0.109636	0.0685484	-0.113281	0.1152	0.199344	-0.138306	1.10014	1.108	1.07896	1.04866	-1.08169	1.08312	1.14818
hsa-miR-24-3p	263	0.0112225	0.076036	0.0872585	0.181283	0.128612	0.871388	0.656549	36.6229	40.6229	40.8451	40.7818	11.5811	8	57	1.34853e-09	8.72637	8.67869	8.82525	8.96674	9.19845	9.27864	9.65474	9.55355	9.56566	-1.14664	-1.27246	-0.885729	-0.512366	0.0990835	0.31069	1.30317	1.03615	1.0681	-0.0476814	0.0988725	0.240361	0.472073	0.552263	0.928368	0.82718	0.839288	-1.0336	1.07094	1.18129	1.3871	1.46638	1.90312	1.77421
hsa-miR-25-3p	264	0.00584086	0.0327926	0.0386335	0.0392362	0.151187	0.848813	0.319771	-10.5744	-6.57439	-6.35216	-6.4155	1.44011	8	57	0.200056	13.7584	13.7353	13.6564	13.9155	13.8172	13.7559	13.7653	13.8593	13.558	0.00438586	-0.214149	-0.960009	1.49032	0.560467	-0.0186623	0.0694221	0.95855	-1.89033	-0.0231109	-0.101988	0.157143	0.0588077	-0.00243743	0.00687784	0.100907	-0.200373	-1.01615	-1.07325	1.11508	1.0416	-1.00169	1.00478	1.07245
hsa-miR-25-5p	265	0.0162251	0.114641	0.130866	0.206565	0.123983	0.876017	0.54493	59.8702	63.8702	64.0924	64.029	6.57671	8	57	4.70781e-06	4.37519	4.34986	4.41625	4.43214	4.38695	4.18361	3.62726	3.46601	3.52134	0.696411	0.635775	0.794704	0.832745	0.724571	0.237767	-1.09413	-1.48016	-1.34769	-0.0253282	0.0410586	0.0569487	0.011763	-0.191582	-0.747933	-0.909182	-0.853848	-1.01771	1.02887	1.04026	1.00819	-1.14202	-1.67939	-1.87798
hsa-miR-26a-2-3p	266	0	0.217506	0.217506	0.199342	0	1	0.0431716	91.0871	93.0871	93.1598	93.1666	0.321476	8	57	0.954598	2.93786	3.07555	3.08582	3.0475	3.00641	2.82458	3.05306	3.1372	2.79955	-0.495337	0.669853	0.756813	0.432476	0.0847671	-1.454	0.479561	1.19165	-1.66578	0.137686	0.147961	0.109636	0.0685484	-0.113281	0.1152	0.199344	-0.138306	1.10014	1.108	1.07896	1.04866	-1.08169	1.08312	1.14818
hsa-miR-26a-5p	267	0.0425282	0.0187565	0.0612847	0.0604229	0.693945	0.306055	0.75944	-27.9901	-23.9901	-23.7679	-23.8312	3.38706	8	57	0.00302178	12.4587	12.3884	12.4864	12.3928	12.5219	12.5042	12.7023	12.5724	12.7138	-0.575882	-1.17049	-0.341697	-1.13345	-0.040945	-0.190876	1.48521	0.385689	1.58244	-0.0702934	0.0276849	-0.0659147	0.0632391	0.0455146	0.243658	0.113675	0.255152	-1.04993	1.01938	-1.04675	1.04481	1.03205	1.18399	1.08198
hsa-miR-26b-3p	268	0	0.146201	0.146201	0.160865	0	1	0.203013	68.4444	70.4444	70.5171	70.5238	1.81492	8	57	0.0930192	2.93786	3.24436	3.16369	3.28801	3.49	3.00916	3.20382	3.17158	2.79955	-1.01457	0.484221	0.0897402	0.697675	1.6854	-0.665913	0.286005	0.128334	-1.69089	0.306498	0.225827	0.350148	0.552134	0.0712987	0.265963	0.23372	-0.138306	1.2367	1.16945	1.27469	1.46625	1.05066	1.20244	1.17586
hsa-miR-26b-5p	269	0.290632	0.0842242	0.374857	0.400516	0.775316	0.224684	0.837434	60.4315	64.4315	64.6537	64.5904	6.91543	8	57	2.52212e-06	11.9467	11.8436	12.0525	12.2109	12.3365	12.2106	12.5201	12.8283	12.8705	-1.0058	-1.28842	-0.715355	-0.280817	0.0636192	-0.28181	0.56719	1.41287	1.52853	-0.103023	0.105874	0.264275	0.38983	0.263912	0.573395	0.881666	0.923827	-1.07402	1.07615	1.20103	1.31024	1.20073	1.48802	1.8425
hsa-miR-27a-3p	270	0.0892902	0.148799	0.238089	0.458132	0.375029	0.624971	0.744055	81.7169	85.7169	85.9391	85.8758	13.9913	8	57	5.16907e-11	7.54666	7.81249	7.76263	7.75769	8.27891	8.5343	9.02708	8.87659	8.97698	-1.25838	-0.805878	-0.890746	-0.899166	-0.0119499	0.422784	1.26159	1.00543	1.17631	0.265834	0.215976	0.21103	0.732247	0.987643	1.48042	1.32993	1.43032	1.20233	1.16149	1.15751	1.66122	1.98294	2.7903	2.51391
hsa-miR-27a-5p	271	0.00461765	0.164733	0.169351	0.199933	0.0272668	0.972733	0.293693	76.6627	80.6627	80.8849	80.8216	2.59981	8	57	0.0169862	3.06112	3.07555	3.08582	3.12769	3.19591	3.00845	3.40599	3.66123	4.45751	-0.60181	-0.570915	-0.54891	-0.459249	-0.313152	-0.714613	0.136733	0.683343	2.38857	0.0144268	0.0247024	0.0665702	0.134792	-0.0526743	0.34487	0.600114	1.39639	1.01005	1.01727	1.04722	1.09793	-1.03719	1.27004	1.51584
hsa-miR-27b-3p	272	0.0343864	0.0314366	0.065823	0.0699364	0.522407	0.477593	0.649193	-3.26842	0.731578	0.9538	0.890461	2.73022	8	57	0.0127508	9.39523	9.64627	9.44747	9.57594	9.62234	9.64696	9.57693	9.48351	9.32243	-1.09943	1.04195	-0.65382	0.442057	0.837793	1.04784	0.450448	-0.346391	-1.72045	0.251039	0.05224	0.180713	0.227106	0.25173	0.181696	0.0882807	-0.0728035	1.19006	1.03687	1.13344	1.17048	1.19063	1.13422	1.0631
hsa-miR-28-3p	273	0.0159835	0.0808514	0.0968349	0.107482	0.16506	0.83494	0.389786	41.2993	45.2993	45.5215	45.4582	2.51376	8	57	0.0205215	5.62466	5.45349	5.82707	5.66719	5.73231	5.5624	5.98518	5.92485	5.37704	-0.287957	-1.12134	0.697581	-0.0808788	0.236192	-0.591088	1.46739	1.17364	-1.49354	-0.171168	0.202418	0.0425314	0.107654	-0.0622595	0.360528	0.300195	-0.247613	-1.12597	1.15063	1.02992	1.07747	-1.0441	1.2839	1.23131
hsa-miR-28-5p	274	0	0.155917	0.155917	0.146422	0	1	0.0662115	72.1118	74.1118	74.1845	74.1912	0.505208	8	57	0.847408	2.98063	3.07555	3.10301	3.14944	3.09997	2.84177	3.05306	3.1372	2.79955	-0.362041	0.384072	0.599957	0.964961	0.576036	-1.45361	0.207314	0.868754	-1.78544	0.0949158	0.122379	0.168813	0.119336	-0.138863	0.0724299	0.156574	-0.181076	1.068	1.08853	1.12413	1.08624	-1.10104	1.05149	1.11464
hsa-miR-296-3p	275	0.067981	0.155191	0.223172	0.274626	0.304613	0.695387	0.551658	82.3487	86.3487	86.5709	86.5076	4.62445	8	57	0.000217614	4.22842	4.43601	4.25348	4.58335	4.60779	3.8858	3.86962	3.72152	3.38738	0.288116	0.785461	0.348172	1.13843	1.197	-0.532699	-0.571464	-0.926254	-1.72676	0.207598	0.0250682	0.35493	0.379379	-0.342618	-0.358799	-0.506892	-0.841033	1.15476	1.01753	1.27892	1.30078	-1.26806	-1.28236	-1.42099
hsa-miR-296-5p	276	0.201125	0.212624	0.413749	0.685779	0.486104	0.513896	0.757551	104.786	108.786	109.008	108.945	14	8	57	5.11181e-11	5.07866	4.89488	4.67992	6.07028	6.04235	5.00661	4.60188	4.03026	3.64651	0.228686	0.000354198	-0.266719	1.46071	1.42601	0.139177	-0.363677	-1.07388	-1.55066	-0.183778	-0.398737	0.991621	0.963689	-0.0720433	-0.476776	-1.0484	-1.43214	-1.13585	-1.31835	1.98842	1.95029	-1.0512	-1.39163	-2.06823
hsa-miR-299-3p	277	0	0.217506	0.217506	0.199342	0	1	0.0431716	91.0871	93.0871	93.1598	93.1666	0.321476	8	57	0.954598	2.93786	3.07555	3.08582	3.0475	3.00641	2.82458	3.05306	3.1372	2.79955	-0.495337	0.669853	0.756813	0.432476	0.0847671	-1.454	0.479561	1.19165	-1.66578	0.137686	0.147961	0.109636	0.0685484	-0.113281	0.1152	0.199344	-0.138306	1.10014	1.108	1.07896	1.04866	-1.08169	1.08312	1.14818
hsa-miR-299-5p	278	0.129024	0.124641	0.253665	0.266973	0.508638	0.491362	0.635377	74.9025	78.9025	79.1247	79.0614	3.48801	8	57	0.00242641	3.69033	3.79918	3.91109	3.75129	3.32772	3.20982	3.71341	3.46372	3.20306	0.475607	0.883161	1.30214	0.703838	-0.881958	-1.32337	0.562033	-0.372797	-1.34865	0.108859	0.220768	0.0609611	-0.362609	-0.480511	0.0230845	-0.226611	-0.487264	1.07837	1.16535	1.04316	-1.28575	-1.39524	1.01613	-1.17008
hsa-miR-29a-3p	279	0.149799	0.293069	0.442868	0.730154	0.338247	0.661753	0.682657	119.439	123.439	123.661	123.598	11.4302	8	57	1.67456e-09	8.95818	8.85119	9.15871	8.39938	8.62	9.24457	10.1455	10.8369	10.8823	-0.532139	-0.646687	-0.317435	-1.13044	-0.894226	-0.225512	0.739107	1.47939	1.52794	-0.106987	0.200531	-0.558804	-0.338185	0.286386	1.18733	1.87875	1.92408	-1.07698	1.14912	-1.47305	-1.26417	1.21958	2.27731	3.67756
hsa-miR-29b-2-5p	280	0	0.092318	0.092318	0.0937746	0	1	0.136698	42.2389	44.2389	44.3116	44.3183	1.1282	8	57	0.358756	3.15443	3.07555	3.1187	3.30681	3.23005	2.93058	3.05306	3.17158	2.79955	0.396751	-0.115794	0.164605	1.38684	0.888075	-1.05772	-0.261896	0.508188	-1.90905	-0.0788834	-0.0357285	0.15238	0.0756174	-0.223851	-0.101369	0.0171507	-0.354875	-1.0562	-1.02507	1.1114	1.05381	-1.16785	-1.07279	1.01196
hsa-miR-29b-3p	281	0.0610849	0.0884132	0.149498	0.269722	0.4086	0.5914	0.742375	52.8683	56.8683	57.0905	57.0272	14.9252	8	57	1.60016e-11	8.50186	8.65079	8.6411	8.49733	8.74045	9.10371	9.45997	9.81782	9.90097	-0.951434	-0.685613	-0.702903	-0.959531	-0.525561	0.122848	0.758761	1.39751	1.54592	0.148922	0.139236	-0.00453622	0.238589	0.60185	0.958111	1.31596	1.39911	1.10874	1.10132	-1.00315	1.17984	1.51766	1.94276	2.48968
hsa-miR-29c-3p	282	0.0573878	0.106999	0.164387	0.247884	0.349102	0.650898	0.659076	62.2773	66.2773	66.4995	66.4362	9.62089	8	57	2.55993e-08	11.241	11.4492	11.4288	11.0426	11.3321	11.7057	12.0494	12.3384	12.3487	-0.870261	-0.437434	-0.479713	-1.28282	-0.680834	0.0960271	0.810536	1.41147	1.43303	0.208164	0.18783	-0.198417	0.0911029	0.464727	0.808364	1.09738	1.10775	1.15522	1.13905	-1.14744	1.06518	1.38006	1.75122	2.13966
hsa-miR-29c-5p	283	0.0726968	0.105492	0.178189	0.227198	0.407975	0.592025	0.635057	62.9203	66.9203	67.1425	67.0791	4.7433	8	57	0.000170328	6.4471	6.1259	6.28922	5.98978	6.29079	5.93775	5.70431	5.78321	5.72528	1.52856	0.344067	0.946368	-0.15787	0.952164	-0.34976	-1.21059	-0.919667	-1.13327	-0.321202	-0.157875	-0.457314	-0.156303	-0.509349	-0.742783	-0.663892	-0.721815	-1.24937	-1.11564	-1.37298	-1.11443	-1.42341	-1.6734	-1.58435
hsa-miR-301a-3p	284	0.10914	0.135936	0.245076	0.279918	0.445331	0.554669	0.619301	78.286	82.286	82.5082	82.4449	3.56797	8	57	0.00204031	5.10086	5.61809	5.43034	5.29895	5.66333	5.7836	5.70211	5.50086	5.59095	-1.95158	0.450928	-0.421178	-1.03146	0.661074	1.21973	0.841224	-0.0936209	0.32488	0.517227	0.329474	0.198089	0.562468	0.682738	0.601252	0.399993	0.49009	1.4312	1.25656	1.14718	1.47679	1.60518	1.51703	1.3195
hsa-miR-301a-5p	285	0	0.217506	0.217506	0.199342	0	1	0.0431716	91.0871	93.0871	93.1598	93.1666	0.321476	8	57	0.954598	2.93786	3.07555	3.08582	3.0475	3.00641	2.82458	3.05306	3.1372	2.79955	-0.495337	0.669853	0.756813	0.432476	0.0847671	-1.454	0.479561	1.19165	-1.66578	0.137686	0.147961	0.109636	0.0685484	-0.113281	0.1152	0.199344	-0.138306	1.10014	1.108	1.07896	1.04866	-1.08169	1.08312	1.14818
hsa-miR-3064-5p	286	0	0.217506	0.217506	0.199342	0	1	0.0431716	91.0871	93.0871	93.1598	93.1666	0.321476	8	57	0.954598	2.93786	3.07555	3.08582	3.0475	3.00641	2.82458	3.05306	3.1372	2.79955	-0.495337	0.669853	0.756813	0.432476	0.0847671	-1.454	0.479561	1.19165	-1.66578	0.137686	0.147961	0.109636	0.0685484	-0.113281	0.1152	0.199344	-0.138306	1.10014	1.108	1.07896	1.04866	-1.08169	1.08312	1.14818
hsa-miR-30a-3p	287	0.44372	0.424396	0.868116	0.744172	0.51113	0.48887	0.554662	144.803	148.803	149.025	148.961	0.730126	8	57	0.664371	4.92913	4.56319	4.81385	4.69647	5.01618	4.77522	4.75112	5.38832	5.21338	0.0911701	-1.30347	-0.348168	-0.795523	0.422922	-0.495385	-0.587243	1.8412	1.17449	-0.365938	-0.115277	-0.232658	0.0870481	-0.153906	-0.178008	0.459189	0.284252	-1.28872	-1.08318	-1.175	1.06219	-1.11258	-1.13132	1.37477
hsa-miR-30a-5p	288	3.33256	0.477328	3.80989	3.57385	0.874714	0.125286	0.897006	164.117	168.117	168.339	168.275	11.5	8	57	1.51456e-09	6.95555	6.93996	7.20299	6.58922	6.59133	7.8192	8.59318	9.60671	8.86	-0.664066	-0.678272	-0.438568	-0.997912	-0.995987	0.122995	0.828336	1.75198	1.07149	-0.0155886	0.247441	-0.366333	-0.364221	0.863651	1.63763	2.65116	1.90445	-1.01086	1.1871	-1.28907	-1.28719	1.81964	3.11154	6.28171
hsa-miR-30b-3p	289	0	0.217506	0.217506	0.199342	0	1	0.0431716	91.0871	93.0871	93.1598	93.1666	0.321476	8	57	0.954598	2.93786	3.07555	3.08582	3.0475	3.00641	2.82458	3.05306	3.1372	2.79955	-0.495337	0.669853	0.756813	0.432476	0.0847671	-1.454	0.479561	1.19165	-1.66578	0.137686	0.147961	0.109636	0.0685484	-0.113281	0.1152	0.199344	-0.138306	1.10014	1.108	1.07896	1.04866	-1.08169	1.08312	1.14818
hsa-miR-30b-5p	290	0.0423795	0.0825526	0.124932	0.147401	0.33922	0.66078	0.557245	47.2456	51.2456	51.4678	51.4044	4.90735	8	57	0.000121757	8.02823	7.8624	8.10487	7.7513	7.70742	8.06479	8.50202	8.25899	8.32999	-0.148296	-0.770057	0.139072	-1.18666	-1.35118	-0.0112197	1.62821	0.71695	0.983175	-0.165823	0.0766408	-0.27693	-0.320807	0.0365582	0.473793	0.230761	0.301763	-1.12181	1.05456	-1.21161	-1.24903	1.02566	1.38876	1.17345
hsa-miR-30c-1-3p	291	0.00316683	0.101557	0.104724	0.0993421	0.0302399	0.96976	0.125468	49.2338	53.2338	53.456	53.3927	0.613645	8	57	0.762709	3.32146	3.46206	3.24664	3.48675	3.41145	3.49439	3.29154	3.40327	3.38801	-0.779074	0.830615	-1.63571	1.1133	0.251224	1.20076	-1.12164	0.157617	-0.0170976	0.140598	-0.0748226	0.165289	0.0899911	0.172929	-0.0299209	0.0818151	0.0665547	1.10236	-1.05323	1.12139	1.06436	1.12734	-1.02096	1.05835
hsa-miR-30c-2-3p	292	0	0.217506	0.217506	0.199342	0	1	0.0431716	91.0871	93.0871	93.1598	93.1666	0.321476	8	57	0.954598	2.93786	3.07555	3.08582	3.0475	3.00641	2.82458	3.05306	3.1372	2.79955	-0.495337	0.669853	0.756813	0.432476	0.0847671	-1.454	0.479561	1.19165	-1.66578	0.137686	0.147961	0.109636	0.0685484	-0.113281	0.1152	0.199344	-0.138306	1.10014	1.108	1.07896	1.04866	-1.08169	1.08312	1.14818
hsa-miR-30c-5p	293	0.0120736	0.0487928	0.0608664	0.061265	0.198362	0.801638	0.358371	13.5126	17.5126	17.7348	17.6714	1.58024	8	57	0.151179	10.3344	10.1126	10.3062	10.1961	10.2605	10.2472	10.484	10.3446	10.4322	0.283016	-1.65455	0.0368659	-0.925464	-0.362755	-0.478324	1.59053	0.372417	1.13827	-0.221733	-0.0281691	-0.138297	-0.0739011	-0.0871266	0.14963	0.0102308	0.0978737	-1.16613	-1.01972	-1.1006	-1.05256	-1.06225	1.10928	1.00712
hsa-miR-30d-3p	294	0.000962876	0.10773	0.108693	0.106032	0.00885864	0.991141	0.11633	51.523	55.523	55.7453	55.6819	0.805787	8	57	0.600159	3.31812	3.23161	3.35366	3.31612	3.37828	3.11825	3.23154	3.1372	2.80079	0.609521	0.124047	0.809008	0.598313	0.947154	-0.512155	0.123651	-0.405796	-2.29374	-0.0865054	0.0355459	-0.00199715	0.0601619	-0.199869	-0.0865759	-0.180917	-0.517325	-1.0618	1.02494	-1.00139	1.04258	-1.14859	-1.06185	-1.1336
hsa-miR-30d-5p	295	0.011313	0.024184	0.035497	0.0460766	0.318704	0.681296	0.58421	-23.2529	-19.2529	-19.0307	-19.094	5.43822	8	57	4.18995e-05	12.1625	11.928	12.0034	11.7767	11.8995	12.0554	12.099	12.0928	11.8221	1.35458	-0.406405	0.159775	-1.54325	-0.620519	0.549764	0.877411	0.830869	-1.20221	-0.234462	-0.159079	-0.385825	-0.26297	-0.107155	-0.0635311	-0.0697278	-0.340418	-1.17647	-1.11657	-1.30661	-1.19995	-1.0771	-1.04502	-1.04952
hsa-miR-30e-3p	296	0.00858856	0.0350585	0.0436471	0.0517415	0.196773	0.803227	0.453958	-5.37599	-1.37599	-1.15377	-1.21711	3.08094	8	57	0.00589952	7.87201	8.03553	8.16712	7.77036	7.85901	7.88353	7.94405	7.97298	8.00511	-0.62996	0.771381	1.89909	-1.50113	-0.741385	-0.531296	-0.012635	0.235279	0.510655	0.16352	0.29511	-0.101655	-0.0130021	0.0115128	0.0720346	0.100963	0.133097	1.12002	1.22698	-1.073	-1.00905	1.00801	1.0512	1.07249
hsa-miR-30e-5p	297	0.0128133	0.047808	0.0606213	0.0960317	0.211367	0.788633	0.599864	12.7252	16.7252	16.9474	16.8841	7.92869	8	57	4.17521e-07	11.7995	11.8146	11.8089	11.5907	11.8368	12.0779	12.2595	12.3833	12.2169	-0.664231	-0.60776	-0.628826	-1.44821	-0.524339	0.380711	1.0625	1.5274	0.902754	0.0150419	0.00943049	-0.208826	0.0372624	0.278338	0.459943	0.583778	0.417392	1.01048	1.00656	-1.15575	1.02616	1.2128	1.37549	1.49877
hsa-miR-3120-3p	298	0	0.217506	0.217506	0.199342	0	1	0.0431716	91.0871	93.0871	93.1598	93.1666	0.321476	8	57	0.954598	2.93786	3.07555	3.08582	3.0475	3.00641	2.82458	3.05306	3.1372	2.79955	-0.495337	0.669853	0.756813	0.432476	0.0847671	-1.454	0.479561	1.19165	-1.66578	0.137686	0.147961	0.109636	0.0685484	-0.113281	0.1152	0.199344	-0.138306	1.10014	1.108	1.07896	1.04866	-1.08169	1.08312	1.14818
hsa-miR-3122	299	0.0384782	0.0987536	0.137232	0.13976	0.280388	0.719612	0.4378	55.9559	59.9559	60.1781	60.1147	1.35122	8	57	0.237775	3.66487	3.34092	3.62665	3.57363	3.51041	3.36578	3.39812	3.68703	3.49918	1.12936	-1.37038	0.834485	0.425354	-0.0624882	-1.17859	-0.928971	1.30041	-0.149182	-0.323945	-0.0382138	-0.0912335	-0.154453	-0.299091	-0.266742	0.0221662	-0.165688	-1.25175	-1.02684	-1.06528	-1.113	-1.23037	-1.20309	1.01548
hsa-miR-3128	300	0.00922824	0.424302	0.43353	0.567263	0.0212863	0.978714	0.356003	130.298	134.298	134.521	134.457	3.66269	8	57	0.00166267	2.94074	3.07555	3.15894	3.06468	3.12405	3.86108	3.58696	4.32128	4.77173	-0.933569	-0.72529	-0.596446	-0.742071	-0.650357	0.488336	0.0648242	1.19932	1.89525	0.134811	0.218207	0.123949	0.183312	0.920348	0.646224	1.38054	1.83099	1.09795	1.16329	1.08971	1.13549	1.89257	1.56507	2.60366
hsa-miR-3135b	301	0.0286799	0.125283	0.153963	0.166805	0.186278	0.813722	0.393482	66.9073	70.9073	71.1295	71.0662	2.10639	8	57	0.0499149	3.11566	3.28549	3.33126	3.55805	3.64012	3.21195	3.35314	3.29321	2.98767	-0.956816	-0.114215	0.112884	1.23818	1.64537	-0.479079	0.221446	-0.0758977	-1.59187	0.169822	0.215592	0.44239	0.524456	0.0962852	0.237472	0.177544	-0.127993	1.12492	1.16118	1.35885	1.43839	1.06902	1.17893	1.13096
hsa-miR-3140-3p	302	0	0.194689	0.194689	0.178764	0	1	0.0449617	84.7701	86.7701	86.8429	86.8496	0.335434	8	57	0.948627	2.93786	3.12286	3.08582	3.09756	3.05372	2.88908	3.05306	3.1372	2.79955	-0.699369	0.882794	0.566033	0.666452	0.291516	-1.11654	0.285847	1.00547	-1.8822	0.185	0.147961	0.159703	0.115862	-0.0487795	0.1152	0.199344	-0.138306	1.13682	1.108	1.11706	1.08362	-1.03439	1.08312	1.14818
hsa-miR-3141	303	0	0.213757	0.213757	0.481965	0	1	0.611075	90.096	92.096	92.1688	92.1755	11.1947	8	57	2.35563e-09	3.1164	3.07555	3.08582	4.41351	4.31631	3.31748	3.05306	3.1372	2.79955	-0.433722	-0.504056	-0.486365	1.79945	1.63211	-0.0875305	-0.542769	-0.397902	-0.979217	-0.0408526	-0.0305769	1.29711	1.19991	0.201082	-0.0633385	0.0208057	-0.316844	-1.02872	-1.02142	2.45737	2.29726	1.14956	-1.04488	1.01453
hsa-miR-3146	304	0.0101943	0.140455	0.150649	0.140508	0.0676691	0.932331	0.162821	69.3582	73.3582	73.5805	73.5171	0.521764	8	57	0.835211	3.17844	3.07555	3.10301	3.13226	3.0236	2.94958	3.12328	3.31164	2.82327	0.70762	-0.0325313	0.165029	0.375407	-0.406229	-0.938677	0.310822	1.66582	-1.84726	-0.102891	-0.0754278	-0.0461822	-0.154841	-0.228858	-0.0551605	0.133203	-0.355164	-1.07392	-1.05367	-1.03253	-1.1133	-1.17191	-1.03897	1.09673
hsa-miR-3149	305	0.00207229	0.227608	0.22968	0.207169	0.0090225	0.990977	0.0445937	94.1672	98.1672	98.3894	98.3261	0.211961	8	57	0.987566	2.93864	3.07555	3.08582	3.0475	3.00641	2.91489	3.07949	3.14472	2.79584	-0.655559	0.604423	0.698995	0.346265	-0.0318831	-0.874205	0.640741	1.24108	-1.96986	0.136902	0.147178	0.108852	0.0677648	-0.0237568	0.140848	0.206077	-0.142804	1.09954	1.1074	1.07837	1.04809	-1.0166	1.10255	1.15355
hsa-miR-3158-3p	306	0	0.122669	0.122669	0.115928	0	1	0.0720851	58.4413	60.4413	60.514	60.5208	0.553506	8	57	0.810992	2.98307	3.07555	3.13314	3.09481	3.2156	2.94033	3.05306	3.1372	2.79955	-0.52225	0.221152	0.684084	0.376006	1.347	-0.865784	0.0403998	0.71679	-1.9974	0.0924808	0.15007	0.111745	0.232538	-0.0427363	0.0699948	0.154139	-0.183511	1.0662	1.10962	1.08053	1.1749	-1.03007	1.04971	1.11276
hsa-miR-31-5p	307	0	0.227777	0.227777	0.221366	0	1	0.0976815	93.7171	95.7171	95.7898	95.7965	0.771325	8	57	0.629277	3.11543	3.10843	3.10301	3.1535	3.00641	2.82458	3.20357	3.47056	2.79955	0.14002	0.105238	0.0783538	0.328976	-0.401189	-1.30382	0.577535	1.90294	-1.42805	-0.00700663	-0.0124223	0.0380639	-0.109023	-0.290853	0.0881345	0.355128	-0.315878	-1.00487	-1.00865	1.02673	-1.0785	-1.22336	1.06299	1.2791
hsa-miR-3160-3p	308	0	0.217506	0.217506	0.199342	0	1	0.0431716	91.0871	93.0871	93.1598	93.1666	0.321476	8	57	0.954598	2.93786	3.07555	3.08582	3.0475	3.00641	2.82458	3.05306	3.1372	2.79955	-0.495337	0.669853	0.756813	0.432476	0.0847671	-1.454	0.479561	1.19165	-1.66578	0.137686	0.147961	0.109636	0.0685484	-0.113281	0.1152	0.199344	-0.138306	1.10014	1.108	1.07896	1.04866	-1.08169	1.08312	1.14818
hsa-miR-3173-3p	309	0	0.217506	0.217506	0.199342	0	1	0.0431716	91.0871	93.0871	93.1598	93.1666	0.321476	8	57	0.954598	2.93786	3.07555	3.08582	3.0475	3.00641	2.82458	3.05306	3.1372	2.79955	-0.495337	0.669853	0.756813	0.432476	0.0847671	-1.454	0.479561	1.19165	-1.66578	0.137686	0.147961	0.109636	0.0685484	-0.113281	0.1152	0.199344	-0.138306	1.10014	1.108	1.07896	1.04866	-1.08169	1.08312	1.14818
hsa-miR-3173-5p	310	0.00051653	0.154356	0.154873	0.152788	0.00333519	0.996665	0.116913	71.7234	75.7234	75.9456	75.8822	0.893314	8	57	0.528167	3.02217	3.16031	3.08582	3.17543	3.42522	3.05101	3.05311	3.13665	2.79941	-0.477993	0.359466	-0.0921122	0.451164	1.9656	-0.303151	-0.290465	0.216075	-1.82859	0.138131	0.0636473	0.153255	0.403047	0.0288385	0.0309309	0.11448	-0.222767	1.10048	1.0451	1.11208	1.3223	1.02019	1.02167	1.08258
hsa-miR-3174	311	0	0.217506	0.217506	0.199342	0	1	0.0431716	91.0871	93.0871	93.1598	93.1666	0.321476	8	57	0.954598	2.93786	3.07555	3.08582	3.0475	3.00641	2.82458	3.05306	3.1372	2.79955	-0.495337	0.669853	0.756813	0.432476	0.0847671	-1.454	0.479561	1.19165	-1.66578	0.137686	0.147961	0.109636	0.0685484	-0.113281	0.1152	0.199344	-0.138306	1.10014	1.108	1.07896	1.04866	-1.08169	1.08312	1.14818
hsa-miR-3199	312	0	0.206218	0.206218	0.190229	0	1	0.0493707	88.0496	90.0496	90.1223	90.129	0.370035	8	57	0.932135	2.93786	3.07555	3.08582	3.09481	3.00641	2.82458	3.05306	3.1372	2.79955	-0.524053	0.607091	0.69151	0.765354	0.039101	-1.45471	0.422359	1.11364	-1.66029	0.137686	0.147961	0.15695	0.0685484	-0.113281	0.1152	0.199344	-0.138306	1.10014	1.108	1.11493	1.04866	-1.08169	1.08312	1.14818
hsa-miR-3200-3p	313	0.310188	0.0968012	0.406989	0.336137	0.762153	0.237847	0.777294	67.8653	71.8653	72.0876	72.0242	1.49051	8	57	0.181068	5.75029	5.92013	5.71823	5.74853	5.64464	5.65077	5.49319	5.45325	5.21514	0.622034	1.44281	0.467113	0.613516	0.111444	0.141108	-0.620443	-0.813448	-1.96413	0.16984	-0.0320573	-0.00176268	-0.105655	-0.0995164	-0.257101	-0.297039	-0.535146	1.12493	-1.02247	-1.00122	-1.07598	-1.07141	-1.19508	-1.22862
hsa-miR-3200-5p	314	0	0.217506	0.217506	0.199342	0	1	0.0431716	91.0871	93.0871	93.1598	93.1666	0.321476	8	57	0.954598	2.93786	3.07555	3.08582	3.0475	3.00641	2.82458	3.05306	3.1372	2.79955	-0.495337	0.669853	0.756813	0.432476	0.0847671	-1.454	0.479561	1.19165	-1.66578	0.137686	0.147961	0.109636	0.0685484	-0.113281	0.1152	0.199344	-0.138306	1.10014	1.108	1.07896	1.04866	-1.08169	1.08312	1.14818
hsa-miR-3202	315	0	0.183979	0.183979	0.166465	0	1	0.0308178	81.545	83.545	83.6177	83.6244	0.226559	8	57	0.984564	2.94703	3.07555	3.1187	3.06468	3.06709	2.97002	3.05306	3.1372	2.79955	-0.751875	0.473643	0.885156	0.370067	0.392982	-0.532658	0.259223	1.0616	-2.15814	0.128519	0.171674	0.117657	0.12006	0.022989	0.106033	0.190177	-0.147473	1.09317	1.12636	1.08497	1.08678	1.01606	1.07626	1.1409
hsa-miR-320a	316	0.0475194	0.128719	0.176238	0.258386	0.269632	0.730368	0.6031	70.7778	74.7778	75.0001	74.9367	6.82114	8	57	2.99715e-06	10.342	10.2508	10.1984	10.4682	10.3585	10.0448	9.86133	9.08984	9.4315	0.722652	0.526979	0.414589	0.993249	0.758046	0.0852803	-0.3082	-1.96264	-1.22996	-0.0912449	-0.143654	0.126183	0.0165045	-0.297214	-0.480699	-1.25218	-0.910525	-1.06529	-1.1047	1.0914	1.01151	-1.22877	-1.39542	-2.38202
hsa-miR-320b	317	0.045086	0.160906	0.205992	0.275484	0.218873	0.781127	0.531144	82.1149	86.1149	86.3372	86.2738	5.43689	8	57	4.201e-05	5.95688	5.92568	5.8567	6.13429	6.09509	5.62869	5.36879	4.91643	4.92743	0.659067	0.593022	0.446988	1.03462	0.951643	-0.035704	-0.585897	-1.54352	-1.52023	-0.0311979	-0.100181	0.177405	0.138207	-0.328194	-0.588093	-1.04045	-1.02945	-1.02186	-1.07191	1.13085	1.10054	-1.25544	-1.50326	-2.05687
hsa-miR-320c	318	0.0566754	0.0734499	0.130125	0.137905	0.435545	0.564455	0.582197	42.9584	46.9584	47.1806	47.1173	2.86146	8	57	0.00955365	4.65204	4.57167	4.42656	4.6446	4.62589	4.24367	4.75347	4.44528	4.03324	0.713768	0.362991	-0.27029	0.681293	0.599654	-1.06847	1.15644	-0.18858	-1.98681	-0.0803759	-0.225483	-0.00744117	-0.0261478	-0.408375	0.101433	-0.206761	-0.6188	-1.05729	-1.16917	-1.00517	-1.01829	-1.32719	1.07284	-1.15409
hsa-miR-320d	319	0	0.107549	0.107549	0.106645	0	1	0.115641	50.9431	52.9431	53.0159	53.0226	0.931684	8	57	0.49785	3.11252	3.16031	3.18151	3.237	3.34672	2.97939	3.24698	3.1372	2.79955	-0.129942	0.166539	0.298132	0.642401	1.32318	-0.955999	0.704314	0.0232047	-2.07183	0.0477828	0.0689913	0.124476	0.234195	-0.133133	0.134454	0.0246821	-0.312968	1.03368	1.04898	1.09011	1.17625	-1.09667	1.09768	1.01726
hsa-miR-320e	320	0	0.217506	0.217506	0.199342	0	1	0.0431716	91.0871	93.0871	93.1598	93.1666	0.321476	8	57	0.954598	2.93786	3.07555	3.08582	3.0475	3.00641	2.82458	3.05306	3.1372	2.79955	-0.495337	0.669853	0.756813	0.432476	0.0847671	-1.454	0.479561	1.19165	-1.66578	0.137686	0.147961	0.109636	0.0685484	-0.113281	0.1152	0.199344	-0.138306	1.10014	1.108	1.07896	1.04866	-1.08169	1.08312	1.14818
hsa-miR-323a-3p	321	0	0.217506	0.217506	0.199342	0	1	0.0431716	91.0871	93.0871	93.1598	93.1666	0.321476	8	57	0.954598	2.93786	3.07555	3.08582	3.0475	3.00641	2.82458	3.05306	3.1372	2.79955	-0.495337	0.669853	0.756813	0.432476	0.0847671	-1.454	0.479561	1.19165	-1.66578	0.137686	0.147961	0.109636	0.0685484	-0.113281	0.1152	0.199344	-0.138306	1.10014	1.108	1.07896	1.04866	-1.08169	1.08312	1.14818
hsa-miR-323b-3p	322	0	0.17905	0.17905	0.168578	0	1	0.0686022	79.9973	81.9973	82.07	82.0767	0.524792	8	57	0.832946	2.95619	3.13622	3.08582	3.0475	3.1486	2.82458	3.05306	3.1372	2.79955	-0.488246	0.868725	0.488816	0.199939	0.961982	-1.48029	0.241877	0.876111	-1.66891	0.18003	0.129627	0.0913019	0.192403	-0.131615	0.0968658	0.18101	-0.15664	1.13291	1.09401	1.06533	1.14267	-1.09552	1.06945	1.13368
hsa-miR-32-3p	323	0	0.21311	0.21311	0.194994	0	1	0.0416059	89.9233	91.9233	91.996	92.0028	0.309311	8	57	0.959477	2.93786	3.07555	3.08582	3.06468	3.00641	2.84177	3.05306	3.1372	2.79955	-0.536598	0.648328	0.73676	0.55485	0.0533318	-1.36358	0.454813	1.17896	-1.72686	0.137686	0.147961	0.126824	0.0685484	-0.0960935	0.1152	0.199344	-0.138306	1.10014	1.108	1.09189	1.04866	-1.06888	1.08312	1.14818
hsa-miR-324-3p	324	0.00358606	0.136457	0.140043	0.152623	0.0256068	0.974393	0.232662	65.8482	69.8482	70.0704	70.0071	1.81219	8	57	0.0935552	3.87169	3.75872	3.67002	3.59844	3.52838	3.58507	3.50174	3.25859	3.15505	1.43425	0.934442	0.541977	0.225266	-0.0846933	0.166121	-0.202547	-1.27837	-1.73645	-0.112966	-0.20167	-0.273253	-0.343309	-0.286621	-0.369946	-0.613102	-0.716636	-1.08145	-1.15003	-1.20853	-1.26866	-1.21978	-1.2923	-1.52954
hsa-miR-324-5p	325	0.00174865	0.080639	0.0823877	0.123831	0.0212247	0.978775	0.439302	35.649	39.649	39.8712	39.8079	5.23598	8	57	6.26831e-05	6.28048	6.29139	6.14164	5.9501	5.96265	5.8068	5.76535	5.59262	5.66233	1.32985	1.37236	0.788724	0.0422498	0.0911469	-0.516253	-0.677806	-1.35098	-1.07929	0.0109092	-0.138844	-0.330379	-0.317833	-0.473683	-0.515135	-0.687861	-0.618151	1.00759	-1.10102	-1.25734	-1.24646	-1.38865	-1.42913	-1.61089
hsa-miR-32-5p	326	0.136867	0.249797	0.386664	0.48352	0.353968	0.646032	0.592143	110.725	114.725	114.947	114.884	5.22899	8	57	6.35675e-05	8.40872	8.86183	8.73188	9.00169	9.35869	9.48546	9.39599	9.3914	9.3422	-1.86583	-0.65796	-1.00439	-0.285132	0.666548	1.00446	0.765979	0.753728	0.622589	0.453108	0.323152	0.592966	0.949971	1.07673	0.98727	0.982674	0.93348	1.36899	1.25106	1.50834	1.93183	2.10925	1.98243	1.97613
hsa-miR-326	327	0.0093645	0.120942	0.130306	0.143618	0.0718654	0.928135	0.296103	61.0015	65.0015	65.2237	65.1604	1.9244	8	57	0.0737708	3.13469	3.31534	3.3047	3.48369	3.32699	2.90477	3.17072	3.14878	2.82424	-0.212462	0.647412	0.596754	1.44868	0.702826	-1.30678	-0.040948	-0.145369	-1.69011	0.180658	0.170015	0.349003	0.1923	-0.229914	0.0360347	0.0140961	-0.310452	1.1334	1.12507	1.27368	1.14258	-1.17277	1.02529	1.00982
hsa-miR-328-3p	328	0	0.176651	0.176651	0.177516	0	1	0.127346	79.2284	81.2284	81.3012	81.3079	1.03974	8	57	0.417748	2.97022	3.07555	3.08582	3.08038	3.37684	2.82458	3.05306	3.1372	2.79955	-0.433334	0.178644	0.23835	0.206705	1.92932	-1.27959	0.0479905	0.536906	-1.42499	0.105324	0.115599	0.110153	0.406621	-0.145643	0.0828378	0.166982	-0.170668	1.07574	1.08343	1.07934	1.32558	-1.10622	1.0591	1.12271
hsa-miR-329-3p	329	0	0.217506	0.217506	0.199342	0	1	0.0431716	91.0871	93.0871	93.1598	93.1666	0.321476	8	57	0.954598	2.93786	3.07555	3.08582	3.0475	3.00641	2.82458	3.05306	3.1372	2.79955	-0.495337	0.669853	0.756813	0.432476	0.0847671	-1.454	0.479561	1.19165	-1.66578	0.137686	0.147961	0.109636	0.0685484	-0.113281	0.1152	0.199344	-0.138306	1.10014	1.108	1.07896	1.04866	-1.08169	1.08312	1.14818
hsa-miR-330-3p	330	0	0.217506	0.217506	0.199342	0	1	0.0431716	91.0871	93.0871	93.1598	93.1666	0.321476	8	57	0.954598	2.93786	3.07555	3.08582	3.0475	3.00641	2.82458	3.05306	3.1372	2.79955	-0.495337	0.669853	0.756813	0.432476	0.0847671	-1.454	0.479561	1.19165	-1.66578	0.137686	0.147961	0.109636	0.0685484	-0.113281	0.1152	0.199344	-0.138306	1.10014	1.108	1.07896	1.04866	-1.08169	1.08312	1.14818
hsa-miR-330-5p	331	0	0.217506	0.217506	0.199342	0	1	0.0431716	91.0871	93.0871	93.1598	93.1666	0.321476	8	57	0.954598	2.93786	3.07555	3.08582	3.0475	3.00641	2.82458	3.05306	3.1372	2.79955	-0.495337	0.669853	0.756813	0.432476	0.0847671	-1.454	0.479561	1.19165	-1.66578	0.137686	0.147961	0.109636	0.0685484	-0.113281	0.1152	0.199344	-0.138306	1.10014	1.108	1.07896	1.04866	-1.08169	1.08312	1.14818
hsa-miR-331-3p	332	0.0635318	0.188843	0.252375	0.722615	0.251736	0.748264	0.791281	92.1468	96.1468	96.369	96.3057	22.3592	8	57	5.61175e-15	6.08016	5.2903	4.78331	7.05088	6.85417	6.04094	5.68911	5.32135	4.8965	0.375596	-0.607934	-1.23924	1.58434	1.33939	0.326764	-0.111341	-0.569279	-1.0983	-0.789855	-1.29685	0.970723	0.774007	-0.0392161	-0.391051	-0.758812	-1.18366	-1.7289	-2.45691	1.95982	1.71001	-1.02756	-1.31135	-1.6921
hsa-miR-331-5p	333	0.0495712	0.0679979	0.117569	0.122175	0.421635	0.578365	0.562989	38.2221	42.2221	42.4443	42.381	2.63102	8	57	0.0158596	4.91468	4.78697	4.73225	4.65209	4.74249	4.48413	4.55899	4.5182	4.49861	1.73576	0.884546	0.519813	-0.0145081	0.588029	-1.13403	-0.635055	-0.906978	-1.03758	-0.127705	-0.182425	-0.262587	-0.17219	-0.430545	-0.355685	-0.39648	-0.416074	-1.09255	-1.13479	-1.19963	-1.12677	-1.34774	-1.27959	-1.31629
hsa-miR-335-3p	334	0.0220898	0.207514	0.229604	0.209128	0.0962083	0.903792	0.178807	92.7096	96.7096	96.9319	96.8685	0.389011	8	57	0.922104	2.98112	3.10843	3.13314	3.12062	3.00641	2.8977	3.20937	3.18555	2.86888	-0.61458	0.419227	0.619892	0.518228	-0.409217	-1.29201	1.23895	1.04555	-1.52604	0.127305	0.152015	0.139496	0.0252887	-0.0834208	0.228247	0.204432	-0.112239	1.09225	1.11112	1.10152	1.01768	-1.05953	1.17141	1.15223
hsa-miR-335-5p	335	0.356778	0.255934	0.612711	0.825241	0.582293	0.417707	0.758649	117.796	121.796	122.019	121.955	10.6854	8	57	4.99458e-09	3.35013	3.54273	3.59402	3.34425	3.47991	4.11313	5.17662	4.75604	4.63371	-0.933193	-0.656182	-0.582414	-0.94165	-0.746531	0.164223	1.69384	1.08892	0.912981	0.192596	0.243884	-0.00587981	0.129779	0.762994	1.82648	1.4059	1.28358	1.14282	1.18418	-1.00408	1.09413	1.69701	3.54672	2.64984
hsa-miR-337-3p	336	0	0.217506	0.217506	0.199342	0	1	0.0431716	91.0871	93.0871	93.1598	93.1666	0.321476	8	57	0.954598	2.93786	3.07555	3.08582	3.0475	3.00641	2.82458	3.05306	3.1372	2.79955	-0.495337	0.669853	0.756813	0.432476	0.0847671	-1.454	0.479561	1.19165	-1.66578	0.137686	0.147961	0.109636	0.0685484	-0.113281	0.1152	0.199344	-0.138306	1.10014	1.108	1.07896	1.04866	-1.08169	1.08312	1.14818
hsa-miR-337-5p	337	0	0.177029	0.177029	0.17503	0	1	0.113063	79.35	81.35	81.4228	81.4295	0.908265	8	57	0.516249	2.9554	3.13622	3.13314	3.2785	3.16429	2.88526	3.07598	3.33197	2.79955	-0.73326	0.293955	0.276409	1.10214	0.453375	-1.13169	-0.0482853	1.40589	-1.61854	0.180828	0.17774	0.3231	0.208892	-0.0701387	0.120581	0.376571	-0.155842	1.13353	1.13111	1.25102	1.1558	-1.04982	1.08717	1.29825
hsa-miR-338-3p	338	0.201062	0.441002	0.642064	0.910447	0.31315	0.68685	0.616057	142.097	146.097	146.32	146.256	6.58953	8	57	4.59691e-06	3.76024	4.46894	4.87594	4.88725	5.70932	4.88793	5.03339	4.76743	4.65634	-1.99039	-0.61115	0.180929	0.202934	1.80279	0.204252	0.487339	-0.0302583	-0.246454	0.708705	1.11571	1.12701	1.94908	1.12769	1.27315	1.00719	0.8961	1.63434	2.16701	2.18406	3.86129	2.18509	2.41689	2.00999
hsa-miR-339-3p	339	0.0781696	0.0580994	0.136269	0.137303	0.573642	0.426358	0.670574	33.0517	37.0517	37.2739	37.2106	2.35059	8	57	0.0293437	8.17128	7.8845	7.98185	7.78278	7.86966	7.92861	8.03276	8.00384	7.78889	1.87484	-0.432358	0.350808	-1.25071	-0.551719	-0.0774629	0.760391	0.527721	-1.20151	-0.286783	-0.189436	-0.388504	-0.30162	-0.24267	-0.138525	-0.167446	-0.382388	-1.21992	-1.14032	-1.30904	-1.23253	-1.18318	-1.10078	-1.12307
hsa-miR-339-5p	340	0.0801058	0.0361284	0.116234	0.160858	0.689176	0.310824	0.82592	9.22751	13.2275	13.4497	13.3864	13.8344	8	57	6.32436e-11	11.137	10.8779	10.9634	10.5012	10.6463	10.5456	10.5793	10.5459	10.4384	1.8435	0.768252	1.12309	-0.794977	-0.193033	-0.610683	-0.471031	-0.609402	-1.05572	-0.259114	-0.173605	-0.635823	-0.490766	-0.591411	-0.557758	-0.591103	-0.698656	-1.19674	-1.12787	-1.55382	-1.40519	-1.50672	-1.47198	-1.5064
hsa-miR-33a-5p	341	0.122232	0.451421	0.573654	0.57152	0.213076	0.786924	0.365337	140.751	144.751	144.973	144.91	1.26238	8	57	0.281275	4.31203	4.56397	4.378	4.17504	4.51366	4.85386	4.18644	5.05126	5.10827	-0.729353	-0.0208795	-0.543839	-1.11458	-0.162359	0.794339	-1.08253	1.34944	1.50976	0.251936	0.0659697	-0.136988	0.201625	0.541831	-0.125589	0.739228	0.796236	1.1908	1.04679	-1.09961	1.14999	1.45582	-1.09095	1.66928
hsa-miR-33b-5p	342	0	0.193408	0.193408	0.179332	0	1	0.0542468	84.3939	86.3939	86.4666	86.4733	0.408678	8	57	0.911004	2.93786	3.07555	3.08582	3.0475	3.1021	2.82458	3.05306	3.1372	2.79955	-0.560624	0.555412	0.638703	0.328049	0.770656	-1.47885	0.373148	1.05519	-1.68169	0.137686	0.147961	0.109636	0.16424	-0.113281	0.1152	0.199344	-0.138306	1.10014	1.108	1.07896	1.12058	-1.08169	1.08312	1.14818
hsa-miR-340-3p	343	0.0105175	0.131917	0.142435	0.167005	0.0738408	0.926159	0.340329	66.0317	70.0317	70.2539	70.1906	2.575	8	57	0.0179383	3.22161	3.24804	3.31682	3.61699	3.75753	3.35717	3.13684	3.1387	3.12481	-0.459011	-0.340855	-0.0333474	1.30866	1.93698	0.147043	-0.838008	-0.829678	-0.891785	0.0264282	0.0952092	0.39538	0.535918	0.135558	-0.0847714	-0.0829081	-0.0967999	1.01849	1.06822	1.31529	1.44986	1.09852	-1.06052	-1.05915
hsa-miR-340-5p	344	0.0998887	0.102553	0.202442	0.275775	0.493419	0.506581	0.709326	63.4057	67.4057	67.6279	67.5646	10.1877	8	57	1.06063e-08	7.9876	8.215	8.20621	8.36457	8.56385	8.89234	8.87072	9.02009	9.07669	-1.46723	-0.901588	-0.923444	-0.529534	-0.0338349	0.783275	0.729488	1.10104	1.24182	0.227396	0.218609	0.376968	0.576247	0.904738	0.883115	1.03249	1.08908	1.17072	1.16361	1.29861	1.49097	1.87221	1.84435	2.04555
hsa-miR-342-3p	345	0.113002	0.297229	0.41023	0.433736	0.275459	0.724541	0.454427	118.633	122.633	122.856	122.792	1.8305	8	57	0.0900157	7.10116	6.75782	6.78613	6.85371	6.37054	6.47427	6.77933	7.20664	6.95113	1.09084	-0.19096	-0.0852798	0.167034	-1.6368	-1.24953	-0.110653	1.48462	0.530735	-0.343341	-0.315033	-0.247449	-0.730622	-0.626887	-0.32183	0.105477	-0.150028	-1.26869	-1.24404	-1.18711	-1.65935	-1.54423	-1.24991	1.07585
hsa-miR-342-5p	346	0.00522158	0.200467	0.205689	0.187712	0.0253858	0.974614	0.0832917	87.762	91.762	91.9842	91.9209	0.315189	8	57	0.957158	3.01792	3.07555	3.08582	3.0475	3.00641	2.82458	3.06197	3.15498	2.79443	0.0849719	0.563454	0.64877	0.330562	-0.0105764	-1.52027	0.450711	1.22297	-1.77059	0.0576291	0.0679048	0.0295793	-0.011508	-0.193338	0.0440502	0.137062	-0.223487	1.04075	1.04819	1.02071	-1.00801	-1.14341	1.031	1.09966
hsa-miR-34a-5p	347	0.542908	0.182229	0.725137	0.883642	0.748697	0.251303	0.840456	103.434	107.434	107.656	107.593	11.425	8	57	1.68711e-09	5.6681	5.83666	6.27854	6.07275	6.94904	7.01925	6.70651	6.4159	6.5074	-1.5245	-1.16545	-0.224201	-0.662546	1.20403	1.35357	0.687415	0.0683888	0.263284	0.168564	0.610442	0.404656	1.28094	1.35115	1.03841	0.747802	0.839298	1.12394	1.52673	1.32377	2.42998	2.55115	2.05396	1.67923
hsa-miR-3613-3p	348	0	0.0952966	0.0952966	0.101037	0	1	0.172896	44.0489	46.0489	46.1216	46.1283	1.48939	8	57	0.18147	3.13403	3.25941	3.08582	3.34509	3.24448	3.3277	3.46798	3.48734	3.56509	-1.17511	-0.399955	-1.47315	0.129722	-0.492261	0.0222194	0.889513	1.00917	1.48985	0.125382	-0.0482087	0.211057	0.110451	0.193668	0.333954	0.353308	0.431059	1.0908	-1.03398	1.15754	1.07957	1.14367	1.26046	1.27749
hsa-miR-3613-5p	349	0.00927866	0.182577	0.191855	0.244522	0.0483628	0.951637	0.368407	83.4943	87.4943	87.7165	87.6532	3.31063	8	57	0.00356946	7.71549	7.92062	8.41494	7.97316	7.58575	7.97314	7.41416	7.9578	7.79025	-0.510413	0.211157	1.94999	0.395982	-0.96678	0.395906	-1.57037	0.341951	-0.247422	0.205131	0.699455	0.257674	-0.129738	0.257652	-0.30133	0.242314	0.0747643	1.15279	1.62389	1.19555	-1.09409	1.19553	-1.23228	1.18289
hsa-miR-361-3p	350	0.0245382	0.0394977	0.0640359	0.0822526	0.383194	0.616806	0.621848	6.31586	10.3159	10.5381	10.4747	5.9208	8	57	1.63105e-05	7.73498	7.47413	7.37767	7.79304	7.91533	7.59868	7.68506	7.70561	7.23568	0.565758	-0.647641	-1.09634	0.83585	1.40475	-0.0682401	0.33355	0.429156	-1.75684	-0.260845	-0.357303	0.0580619	0.180358	-0.136291	-0.049918	-0.0293656	-0.49929	-1.19818	-1.28103	1.04107	1.13316	-1.09908	-1.03521	-1.02056
hsa-miR-361-5p	351	0.0363711	0.0317694	0.0681405	0.0744443	0.533767	0.466233	0.667139	-2.38169	1.61831	1.84053	1.77719	4.1239	8	57	0.000620293	10.4106	10.2471	10.3121	10.3597	10.3929	10.2116	10.2107	9.93376	9.89965	1.02038	0.146217	0.493649	0.748309	0.925913	-0.0438176	-0.0485637	-1.52984	-1.71225	-0.163452	-0.0984887	-0.050872	-0.0176635	-0.198985	-0.199872	-0.476843	-0.51095	-1.11996	-1.07065	-1.03589	-1.01232	-1.14789	-1.1486	-1.3917
hsa-miR-362-3p	352	0	0.218679	0.218679	0.201724	0	1	0.0493732	91.3937	93.3937	93.4664	93.4731	0.370055	8	57	0.932125	2.93786	3.07555	3.08582	3.0475	3.00641	2.82458	3.05306	3.20296	2.79955	-0.508583	0.554999	0.634375	0.338322	0.0209344	-1.38365	0.381301	1.53926	-1.57696	0.137686	0.147961	0.109636	0.0685484	-0.113281	0.1152	0.265102	-0.138306	1.10014	1.108	1.07896	1.04866	-1.08169	1.08312	1.20172
hsa-miR-362-5p	353	0.0737587	0.132034	0.205793	0.217281	0.358413	0.641587	0.520464	74.4925	78.4925	78.7147	78.6513	2.10678	8	57	0.0498721	4.93295	4.51069	4.75124	4.466	4.60409	4.6208	4.63063	4.39242	4.13052	1.64755	-0.217482	0.844961	-0.414836	0.195071	0.268856	0.312295	-0.73985	-1.89657	-0.422266	-0.181716	-0.466949	-0.328859	-0.312153	-0.302318	-0.540536	-0.802431	-1.34003	-1.13423	-1.38218	-1.25602	-1.24156	-1.23312	-1.45451
hsa-miR-363-3p	354	0.280282	0.125939	0.406221	0.372956	0.689975	0.310025	0.738286	80.4289	84.4289	84.6512	84.5878	1.11753	8	57	0.365538	4.83705	4.69414	5.01194	4.65045	4.87677	4.58213	4.8582	4.7243	4.93636	0.283778	-0.724107	1.51715	-1.03225	0.563883	-1.51407	0.432895	-0.51141	0.984143	-0.142914	0.174886	-0.186608	0.0397176	-0.254928	0.0211441	-0.112754	0.0993087	-1.10413	1.12888	-1.13808	1.02791	-1.19328	1.01476	-1.08129
hsa-miR-3656	355	0	0.217506	0.217506	0.199342	0	1	0.0431716	91.0871	93.0871	93.1598	93.1666	0.321476	8	57	0.954598	2.93786	3.07555	3.08582	3.0475	3.00641	2.82458	3.05306	3.1372	2.79955	-0.495337	0.669853	0.756813	0.432476	0.0847671	-1.454	0.479561	1.19165	-1.66578	0.137686	0.147961	0.109636	0.0685484	-0.113281	0.1152	0.199344	-0.138306	1.10014	1.108	1.07896	1.04866	-1.08169	1.08312	1.14818
hsa-miR-3657	356	0.113504	0.129178	0.242683	0.225027	0.467707	0.532293	0.550615	75.9279	79.9279	80.1501	80.0868	0.624897	8	57	0.753409	3.37536	3.3708	3.52294	3.43589	3.41671	3.50754	3.29782	3.26631	2.83736	0.187707	0.165505	0.905053	0.481943	0.388687	0.830195	-0.189207	-0.342405	-2.42748	-0.00456741	0.147574	0.060531	0.0413461	0.132175	-0.0775397	-0.109056	-0.538003	-1.00317	1.10771	1.04285	1.02907	1.09594	-1.05522	-1.07852
hsa-miR-365a-3p	357	0	0.217506	0.217506	0.199342	0	1	0.0431716	91.0871	93.0871	93.1598	93.1666	0.321476	8	57	0.954598	2.93786	3.07555	3.08582	3.0475	3.00641	2.82458	3.05306	3.1372	2.79955	-0.495337	0.669853	0.756813	0.432476	0.0847671	-1.454	0.479561	1.19165	-1.66578	0.137686	0.147961	0.109636	0.0685484	-0.113281	0.1152	0.199344	-0.138306	1.10014	1.108	1.07896	1.04866	-1.08169	1.08312	1.14818
hsa-miR-3688-5p	358	0.00724263	0.184542	0.191784	0.177131	0.0377645	0.962236	0.113139	83.629	87.629	87.8512	87.7879	0.413003	8	57	0.908471	3.10638	3.14867	3.32864	3.06468	3.11241	3.06571	3.09045	3.28072	2.78866	-0.0210395	0.256186	1.43614	-0.294422	0.0184706	-0.287708	-0.125482	1.12194	-2.10408	0.0422841	0.222258	-0.0416981	0.00602633	-0.0406739	-0.0159302	0.174334	-0.317719	1.02974	1.16656	-1.02932	1.00419	-1.02859	-1.0111	1.12844
hsa-miR-3692-5p	359	0	0.217506	0.217506	0.199342	0	1	0.0431716	91.0871	93.0871	93.1598	93.1666	0.321476	8	57	0.954598	2.93786	3.07555	3.08582	3.0475	3.00641	2.82458	3.05306	3.1372	2.79955	-0.495337	0.669853	0.756813	0.432476	0.0847671	-1.454	0.479561	1.19165	-1.66578	0.137686	0.147961	0.109636	0.0685484	-0.113281	0.1152	0.199344	-0.138306	1.10014	1.108	1.07896	1.04866	-1.08169	1.08312	1.14818
hsa-miR-369-3p	360	0.234997	0.210599	0.445596	0.412957	0.527377	0.472623	0.602097	105.27	109.27	109.492	109.429	1.70975	8	57	0.115888	3.57701	3.73668	3.8719	3.61104	3.62883	3.1279	3.48471	3.78814	3.22291	0.0643445	0.706805	1.25085	0.20128	0.272872	-1.74265	-0.306992	0.913829	-1.36034	0.159677	0.294895	0.0340341	0.0518274	-0.44911	-0.0922921	0.211131	-0.354092	1.11704	1.2268	1.02387	1.03658	-1.3652	-1.06606	1.1576
hsa-miR-369-5p	361	0.0894377	0.0889005	0.178338	0.222742	0.501506	0.498494	0.688169	55.4632	59.4632	59.6855	59.6221	5.76547	8	57	2.20376e-05	3.43559	3.67842	3.73011	3.74373	3.60446	2.9682	3.31242	3.2465	3.09533	0.0410464	0.890917	1.07184	1.11951	0.632086	-1.59477	-0.390026	-0.620761	-1.14985	0.242826	0.294519	0.308141	0.168873	-0.467387	-0.123166	-0.189092	-0.340263	1.18331	1.22648	1.23811	1.12418	-1.3826	-1.08912	-1.14005
hsa-miR-370-3p	362	0.212561	0.237739	0.4503	0.686471	0.472043	0.527957	0.728962	110.803	114.803	115.026	114.962	9.82103	8	57	1.87002e-08	4.31087	4.39552	4.26354	4.58763	4.54679	3.34118	3.26984	3.03814	3.03653	0.661559	0.787315	0.591236	1.07271	1.01204	-0.779019	-0.88501	-1.22922	-1.23162	0.0846498	-0.0473365	0.27676	0.235919	-0.969691	-1.04104	-1.27273	-1.27435	1.06043	-1.03336	1.21147	1.17766	-1.95842	-2.05771	-2.41619
hsa-miR-371a-5p	363	0	0.204535	0.204535	0.196918	0	1	0.0891535	87.5824	89.5824	89.6552	89.6619	0.697394	8	57	0.692296	2.93786	3.07555	3.1187	3.0475	3.0236	2.84177	3.26155	3.1372	3.56509	-0.839004	-0.17598	0.0318327	-0.311054	-0.426141	-1.30174	0.719739	0.120935	2.18141	0.137686	0.180841	0.109636	0.0857364	-0.0960935	0.323693	0.199344	0.627229	1.10014	1.13354	1.07896	1.06123	-1.06888	1.25153	1.14818
hsa-miR-372-3p	364	0.0924713	0.185719	0.27819	0.262111	0.332403	0.667597	0.439479	93.29	97.29	97.5122	97.4488	0.586345	8	57	0.784958	3.1519	3.30655	3.26494	3.112	3.20928	3.11626	3.42451	3.39831	2.78473	-0.232325	0.573294	0.356564	-0.440171	0.0665785	-0.417985	1.18779	1.05131	-2.14505	0.154649	0.113045	-0.0398988	0.0573783	-0.0356399	0.272609	0.24641	-0.367172	1.11315	1.08151	-1.02804	1.04057	-1.02501	1.20799	1.18625
hsa-miR-373-3p	365	0	0.193193	0.193193	0.175808	0	1	0.0363636	84.3306	86.3306	86.4033	86.41	0.268867	8	57	0.973491	2.93786	3.07555	3.08582	3.0475	3.07953	2.90245	3.05306	3.1372	2.79955	-0.690024	0.571543	0.665696	0.314532	0.60804	-1.01452	0.365512	1.1365	-1.95728	0.137686	0.147961	0.109636	0.141669	-0.0354151	0.1152	0.199344	-0.138306	1.10014	1.108	1.07896	1.10318	-1.02485	1.08312	1.14818
hsa-miR-374a-3p	366	0.0742841	0.251711	0.325995	0.447111	0.227869	0.772131	0.548756	107.872	111.872	112.095	112.031	5.14715	8	57	7.49198e-05	3.56564	3.99624	3.99095	4.05158	4.67898	4.6899	4.26684	4.36936	4.03232	-1.71264	-0.516993	-0.531666	-0.363329	1.37881	1.40913	0.234415	0.519076	-0.416803	0.430595	0.425311	0.485935	1.11334	1.12426	0.701203	0.803719	0.466677	1.34779	1.34286	1.40049	2.16346	2.1799	1.62586	1.7456
hsa-miR-374a-5p	367	0.054971	0.083894	0.138865	0.155701	0.395859	0.604141	0.57612	49.5656	53.5656	53.7879	53.7245	3.73752	8	57	0.0014151	9.08085	9.32025	9.2966	9.35848	9.5523	9.57235	9.6394	9.57934	9.48017	-1.93997	-0.613935	-0.744901	-0.40217	0.671465	0.782499	1.15391	0.821211	0.271885	0.239393	0.215749	0.277624	0.471451	0.491496	0.558549	0.498485	0.399313	1.1805	1.16131	1.2122	1.3865	1.4059	1.47279	1.41273
hsa-miR-374b-3p	368	0.00597517	0.197684	0.203659	0.188268	0.029339	0.970661	0.101195	87.1558	91.1558	91.378	91.3147	0.423897	8	57	0.901946	2.97264	3.07555	3.08582	3.0475	3.00641	2.82458	3.1473	3.19129	2.79126	-0.319046	0.441377	0.51731	0.234102	-0.0695151	-1.41316	0.971636	1.2967	-1.65941	0.102905	0.113181	0.0748553	0.033768	-0.148062	0.174663	0.218653	-0.181386	1.07393	1.08161	1.05326	1.02368	-1.10808	1.1287	1.16365
hsa-miR-374b-5p	369	0.0552033	0.0760447	0.131248	0.125736	0.420603	0.579397	0.525085	44.5721	48.5721	48.7943	48.7309	2.19251	8	57	0.0414173	7.09564	6.82232	7.12247	7.12482	7.04176	7.06205	7.4269	7.21873	7.18292	-0.163777	-1.86465	0.00321616	0.0178021	-0.499086	-0.372815	1.89769	0.602216	0.379404	-0.273317	0.0268344	0.0291783	-0.0538816	-0.0335908	0.331262	0.123089	0.0872849	-1.20858	1.01877	1.02043	-1.03805	-1.02356	1.25811	1.08906
hsa-miR-375	370	0	0.270597	0.270597	0.258747	0	1	0.0829179	103.536	105.536	105.609	105.616	0.644207	8	57	0.737305	2.93786	3.07555	3.08582	3.0475	3.00641	2.90934	3.15688	3.52122	2.79955	-0.600085	0.0763025	0.126782	-0.0614939	-0.263337	-0.740203	0.475869	2.26569	-1.27952	0.137686	0.147961	0.109636	0.0685484	-0.0285224	0.219021	0.583357	-0.138306	1.10014	1.108	1.07896	1.04866	-1.01997	1.16394	1.49833
hsa-miR-376a-3p	371	0.0770532	0.196266	0.273319	0.24524	0.281917	0.718083	0.363365	95.1458	99.1458	99.368	99.3047	0.650666	8	57	0.731883	3.17306	3.41962	3.22801	3.34756	3.40783	3.17348	3.52295	3.32327	2.99297	-0.709472	0.817233	-0.369234	0.37106	0.744264	-0.70689	1.45708	0.220615	-1.82466	0.246555	0.0549468	0.174501	0.234771	0.000416989	0.349888	0.150204	-0.180097	1.18637	1.03882	1.12857	1.17672	1.00029	1.27446	1.10973
hsa-miR-376b-3p	372	0	0.286848	0.286848	0.278255	0	1	0.0959962	106.861	108.861	108.933	108.94	0.756604	8	57	0.641793	2.93786	3.07555	3.08582	3.0475	3.00641	2.94777	3.15055	3.62248	2.79955	-0.596454	0.00310883	0.047855	-0.119036	-0.297954	-0.553317	0.329736	2.38478	-1.19872	0.137686	0.147961	0.109636	0.0685484	0.00990615	0.212693	0.68462	-0.138306	1.10014	1.108	1.07896	1.04866	1.00689	1.15885	1.60728
hsa-miR-376c-3p	373	0.210981	0.287788	0.498769	0.471475	0.423004	0.576996	0.520764	120.492	124.492	124.714	124.651	1.58106	8	57	0.150928	3.57454	4.03436	3.8821	4.01229	3.66465	3.95536	4.22963	4.31776	3.64263	-1.34426	0.426036	-0.160171	0.341048	-0.997354	0.121871	1.17783	1.51712	-1.08212	0.459815	0.307555	0.437741	0.0901049	0.380812	0.655087	0.743213	0.0680877	1.37537	1.23761	1.35448	1.06445	1.30207	1.57471	1.6739
hsa-miR-377-3p	374	0	0.217506	0.217506	0.199342	0	1	0.0431716	91.0871	93.0871	93.1598	93.1666	0.321476	8	57	0.954598	2.93786	3.07555	3.08582	3.0475	3.00641	2.82458	3.05306	3.1372	2.79955	-0.495337	0.669853	0.756813	0.432476	0.0847671	-1.454	0.479561	1.19165	-1.66578	0.137686	0.147961	0.109636	0.0685484	-0.113281	0.1152	0.199344	-0.138306	1.10014	1.108	1.07896	1.04866	-1.08169	1.08312	1.14818
hsa-miR-378a-3p	375	0.0671992	0.0900333	0.157233	0.155711	0.427387	0.572613	0.546178	54.3628	58.3628	58.5851	58.5217	2.5893	8	57	0.0173833	8.89869	8.81084	8.80397	8.71676	8.63855	9.06944	9.12339	9.23809	8.91281	-0.0700701	-0.515818	-0.550682	-0.993131	-1.38994	0.796217	1.06997	1.65189	0.00157351	-0.0878553	-0.094727	-0.181932	-0.260142	0.170742	0.224697	0.339392	0.0141207	-1.06279	-1.06786	-1.1344	-1.1976	1.12564	1.16853	1.26522
hsa-miR-378a-5p	376	0.0264978	0.133084	0.159582	0.224698	0.166045	0.833955	0.519649	69.7368	73.7368	73.959	73.8956	4.81461	8	57	0.000147152	5.21484	5.0504	4.99787	4.55523	4.72745	4.63169	4.66423	4.2842	4.88624	1.52222	0.947718	0.7642	-0.782213	-0.180525	-0.515094	-0.401419	-1.72909	0.374198	-0.164445	-0.216974	-0.659616	-0.48739	-0.583156	-0.550618	-0.930646	-0.328608	-1.12073	-1.16229	-1.57966	-1.40191	-1.49812	-1.46471	-1.90613
hsa-miR-378c	377	0.045469	0.152804	0.198273	0.200628	0.229325	0.770675	0.389665	79.4627	83.4627	83.685	83.6216	1.94081	8	57	0.0712346	6.65102	6.51185	6.51332	6.43467	6.47353	6.83466	6.96322	7.05051	6.8075	-0.18573	-0.79622	-0.789752	-1.13476	-0.964321	0.619793	1.18371	1.56661	0.500673	-0.139175	-0.1377	-0.216352	-0.177497	0.183637	0.312194	0.399484	0.156481	-1.10127	-1.10015	-1.16179	-1.13092	1.13574	1.24159	1.31904
hsa-miR-378d	378	0.101608	0.204062	0.30567	0.332912	0.332411	0.667589	0.515098	98.659	102.659	102.881	102.818	3.13385	8	57	0.00525353	3.68996	3.65077	3.60301	3.70611	3.90077	4.10633	4.10797	4.70693	3.63684	-0.585729	-0.694511	-0.827077	-0.540894	-0.000550578	0.570066	0.574606	2.23725	-0.733159	-0.0391886	-0.0869453	0.0161518	0.21081	0.416374	0.41801	1.01698	-0.0531117	-1.02754	-1.06212	1.01126	1.15734	1.33457	1.33608	2.02367
hsa-miR-378e	379	0	0.217506	0.217506	0.199342	0	1	0.0431716	91.0871	93.0871	93.1598	93.1666	0.321476	8	57	0.954598	2.93786	3.07555	3.08582	3.0475	3.00641	2.82458	3.05306	3.1372	2.79955	-0.495337	0.669853	0.756813	0.432476	0.0847671	-1.454	0.479561	1.19165	-1.66578	0.137686	0.147961	0.109636	0.0685484	-0.113281	0.1152	0.199344	-0.138306	1.10014	1.108	1.07896	1.04866	-1.08169	1.08312	1.14818
hsa-miR-378f	380	0	0.217506	0.217506	0.199342	0	1	0.0431716	91.0871	93.0871	93.1598	93.1666	0.321476	8	57	0.954598	2.93786	3.07555	3.08582	3.0475	3.00641	2.82458	3.05306	3.1372	2.79955	-0.495337	0.669853	0.756813	0.432476	0.0847671	-1.454	0.479561	1.19165	-1.66578	0.137686	0.147961	0.109636	0.0685484	-0.113281	0.1152	0.199344	-0.138306	1.10014	1.108	1.07896	1.04866	-1.08169	1.08312	1.14818
hsa-miR-378g	381	0	0.217506	0.217506	0.199342	0	1	0.0431716	91.0871	93.0871	93.1598	93.1666	0.321476	8	57	0.954598	2.93786	3.07555	3.08582	3.0475	3.00641	2.82458	3.05306	3.1372	2.79955	-0.495337	0.669853	0.756813	0.432476	0.0847671	-1.454	0.479561	1.19165	-1.66578	0.137686	0.147961	0.109636	0.0685484	-0.113281	0.1152	0.199344	-0.138306	1.10014	1.108	1.07896	1.04866	-1.08169	1.08312	1.14818
hsa-miR-378h	382	0	0.217506	0.217506	0.199342	0	1	0.0431716	91.0871	93.0871	93.1598	93.1666	0.321476	8	57	0.954598	2.93786	3.07555	3.08582	3.0475	3.00641	2.82458	3.05306	3.1372	2.79955	-0.495337	0.669853	0.756813	0.432476	0.0847671	-1.454	0.479561	1.19165	-1.66578	0.137686	0.147961	0.109636	0.0685484	-0.113281	0.1152	0.199344	-0.138306	1.10014	1.108	1.07896	1.04866	-1.08169	1.08312	1.14818
hsa-miR-379-3p	383	0	0.217506	0.217506	0.199342	0	1	0.0431716	91.0871	93.0871	93.1598	93.1666	0.321476	8	57	0.954598	2.93786	3.07555	3.08582	3.0475	3.00641	2.82458	3.05306	3.1372	2.79955	-0.495337	0.669853	0.756813	0.432476	0.0847671	-1.454	0.479561	1.19165	-1.66578	0.137686	0.147961	0.109636	0.0685484	-0.113281	0.1152	0.199344	-0.138306	1.10014	1.108	1.07896	1.04866	-1.08169	1.08312	1.14818
hsa-miR-379-5p	384	0.139448	0.112522	0.251969	0.329292	0.553431	0.446569	0.733727	70.2043	74.2043	74.4266	74.3632	6.96375	8	57	2.30945e-06	4.8939	5.10085	4.97789	5.13692	4.75826	4.45336	4.32675	4.69138	3.32676	0.471818	0.841188	0.621715	0.905566	0.229715	-0.314501	-0.540483	0.110328	-2.32535	0.206943	0.0839811	0.243012	-0.135641	-0.440543	-0.567152	-0.202529	-1.56714	1.15424	1.05994	1.18346	-1.09858	-1.35712	-1.4816	-1.15071
hsa-miR-381-3p	385	0.0998474	0.174565	0.274412	0.313156	0.363859	0.636141	0.56031	90.544	94.544	94.7662	94.7028	2.66917	8	57	0.0145835	4.58913	4.95812	4.75372	4.78981	4.86826	4.5733	4.63303	4.50287	3.0725	0.110361	0.763133	0.401527	0.465382	0.604153	0.0823491	0.18802	-0.0422363	-2.57269	0.368989	0.164586	0.200681	0.279123	-0.0158343	0.0438977	-0.086258	-1.51663	1.29145	1.12084	1.14924	1.21346	-1.01104	1.0309	-1.06161
hsa-miR-382-3p	386	0	0.200138	0.200138	0.184593	0	1	0.0492312	86.3436	88.3436	88.4164	88.4231	0.368936	8	57	0.932695	2.93786	3.07555	3.08582	3.0475	3.06709	2.82458	3.05306	3.1372	2.79955	-0.541619	0.600845	0.686109	0.368098	0.530658	-1.48159	0.414265	1.11246	-1.68923	0.137686	0.147961	0.109636	0.129227	-0.113281	0.1152	0.199344	-0.138306	1.10014	1.108	1.07896	1.09371	-1.08169	1.08312	1.14818
hsa-miR-382-5p	387	0.231184	0.195268	0.426452	0.59306	0.542111	0.457889	0.743292	101.335	105.335	105.557	105.494	8.34623	8	57	2.04755e-07	4.86433	5.37509	5.07598	5.55758	5.23294	4.41225	4.41441	4.21508	3.46384	0.194441	0.960066	0.511708	1.23361	0.746987	-0.483213	-0.479974	-0.778764	-1.90486	0.510764	0.211655	0.693251	0.368615	-0.452077	-0.449916	-0.649245	-1.40049	1.4248	1.15802	1.61692	1.29111	-1.36801	-1.36596	-1.56835
hsa-miR-3913-3p	388	0	0.217506	0.217506	0.199342	0	1	0.0431716	91.0871	93.0871	93.1598	93.1666	0.321476	8	57	0.954598	2.93786	3.07555	3.08582	3.0475	3.00641	2.82458	3.05306	3.1372	2.79955	-0.495337	0.669853	0.756813	0.432476	0.0847671	-1.454	0.479561	1.19165	-1.66578	0.137686	0.147961	0.109636	0.0685484	-0.113281	0.1152	0.199344	-0.138306	1.10014	1.108	1.07896	1.04866	-1.08169	1.08312	1.14818
hsa-miR-3922-5p	389	3.75152e-05	0.0889912	0.0890287	0.0910068	0.000421383	0.999579	0.142853	40.1705	44.1705	44.3927	44.3294	1.18127	8	57	0.326376	3.04822	3.22098	3.20626	3.30457	3.32589	3.11118	3.05302	3.13699	2.79933	-0.535951	0.542883	0.450914	1.06485	1.19797	-0.142825	-0.505982	0.0183433	-2.0902	0.17276	0.158033	0.256346	0.277663	0.0629535	0.00479907	0.0887625	-0.248891	1.12721	1.11576	1.19445	1.21223	1.0446	1.00333	1.06346
hsa-miR-409-3p	390	0.115686	0.149548	0.265234	0.582261	0.436164	0.563836	0.798532	83.5015	87.5015	87.7237	87.6604	18.1295	8	57	3.95906e-13	6.31661	6.43006	6.19263	6.82161	6.63029	5.58765	5.33201	5.05295	3.89279	0.545151	0.666345	0.412713	1.08462	0.880239	-0.233559	-0.506654	-0.804756	-2.0441	0.113451	-0.123976	0.505004	0.313679	-0.728955	-0.984601	-1.26366	-2.42382	1.08181	-1.08973	1.41913	1.24287	-1.65744	-1.97877	-2.40103
hsa-miR-409-5p	391	0.00219503	0.184788	0.186983	0.172639	0.0117392	0.988261	0.0713673	82.431	86.431	86.6532	86.5899	0.38841	8	57	0.922431	2.98948	3.07555	3.1187	3.0475	3.07953	2.82458	3.05665	3.1456	2.79732	-0.205945	0.488925	0.837346	0.262458	0.521084	-1.53731	0.336356	1.05451	-1.75742	0.0860655	0.12922	0.0580157	0.0900487	-0.164901	0.0671686	0.156118	-0.192163	1.06147	1.0937	1.04103	1.06441	-1.12109	1.04766	1.11428
hsa-miR-411-5p	392	0.234928	0.17926	0.414187	0.425285	0.567201	0.432799	0.671754	97.1046	101.105	101.327	101.263	2.70374	8	57	0.0135155	4.81869	5.06876	4.87247	4.79186	4.90864	4.43521	4.77849	4.58144	3.33517	0.382835	0.867599	0.487093	0.330834	0.557217	-0.360521	0.30492	-0.0770658	-2.49291	0.250076	0.0537836	-0.0268258	0.0899587	-0.383477	-0.0401941	-0.23725	-1.48352	1.18927	1.03798	-1.01877	1.06434	-1.30448	-1.02825	-1.17874
hsa-miR-412-5p	393	0	0.217506	0.217506	0.199342	0	1	0.0431716	91.0871	93.0871	93.1598	93.1666	0.321476	8	57	0.954598	2.93786	3.07555	3.08582	3.0475	3.00641	2.82458	3.05306	3.1372	2.79955	-0.495337	0.669853	0.756813	0.432476	0.0847671	-1.454	0.479561	1.19165	-1.66578	0.137686	0.147961	0.109636	0.0685484	-0.113281	0.1152	0.199344	-0.138306	1.10014	1.108	1.07896	1.04866	-1.08169	1.08312	1.14818
hsa-miR-421	394	0.0333658	0.0391784	0.0725441	0.0698618	0.459938	0.540062	0.560783	7.73227	11.7323	11.9545	11.8912	1.43045	8	57	0.203888	7.01413	6.83847	6.98	6.99885	6.88806	6.90383	7.07831	6.84514	6.66566	0.824839	-0.600744	0.547845	0.700848	-0.198294	-0.0702906	1.34576	-0.546639	-2.00332	-0.175654	-0.0341298	-0.0152775	-0.126066	-0.110294	0.064185	-0.168987	-0.348472	-1.12948	-1.02394	-1.01065	-1.09131	-1.07945	1.04549	-1.12427
hsa-miR-423-3p	395	0.0403954	0.0432085	0.083604	0.133238	0.483176	0.516824	0.746371	13.8849	17.8849	18.1071	18.0438	13.7299	8	57	7.23886e-11	9.854	9.59581	9.64236	9.74853	9.70202	9.35677	9.18157	9.10628	8.45849	1.02384	0.434987	0.541145	0.783293	0.677215	-0.110219	-0.509799	-0.681514	-2.15894	-0.258183	-0.211638	-0.105467	-0.151977	-0.497232	-0.672429	-0.747719	-1.3955	-1.19597	-1.158	-1.07584	-1.11109	-1.4115	-1.59375	-1.67914
hsa-miR-423-5p	396	0.0895389	0.265991	0.35553	0.897765	0.251846	0.748154	0.763373	111.675	115.675	115.897	115.834	18.8679	8	57	1.79742e-13	9.88138	9.83674	9.74824	10.1414	10.0052	8.89287	8.32292	7.29145	7.9315	0.73071	0.688042	0.603453	0.979209	0.849004	-0.214072	-0.758802	-1.74464	-1.1329	-0.0446424	-0.133147	0.260003	0.12377	-0.988517	-1.55846	-2.58994	-1.94988	-1.03143	-1.09668	1.19748	1.08958	-1.98414	-2.9454	-6.02072
hsa-miR-424-3p	397	0.00856268	0.141915	0.150477	0.1496	0.0569035	0.943097	0.201287	69.5013	73.5013	73.7235	73.6602	0.986851	8	57	0.455916	2.99716	3.07555	3.08582	3.26819	3.35552	2.98095	3.05624	3.13649	2.81588	-0.558543	-0.064363	0.000421078	1.15017	1.70074	-0.66076	-0.186095	0.319869	-1.70144	0.0783836	0.0886593	0.271026	0.358353	-0.0162131	0.0590753	0.139328	-0.18128	1.05583	1.06338	1.20667	1.28196	-1.0113	1.0418	1.10139
hsa-miR-424-5p	398	0.672921	0.258076	0.930996	1.60332	0.722796	0.277204	0.875376	122.377	126.377	126.599	126.536	22.2911	8	57	5.98134e-15	3.29843	3.73481	3.78348	3.94931	4.52218	5.15347	5.60041	5.65664	6.13275	-1.32561	-0.89696	-0.849154	-0.686256	-0.123537	0.496573	0.935605	0.990832	1.45851	0.436381	0.485049	0.650885	1.22375	1.85504	2.30199	2.35821	2.83432	1.35321	1.39963	1.57013	2.33553	3.61761	4.93136	5.12733
hsa-miR-425-3p	399	0.0136648	0.0312642	0.044929	0.063987	0.304142	0.695858	0.612334	-8.98761	-4.98761	-4.76539	-4.82872	6.54739	8	57	4.97192e-06	7.9943	7.86406	7.96335	7.56347	7.63507	7.68419	7.71487	7.76341	7.7165	1.55938	0.667526	1.34743	-1.39082	-0.900577	-0.564179	-0.354129	-0.0217117	-0.342914	-0.130241	-0.0309515	-0.43083	-0.359238	-0.310112	-0.279438	-0.230893	-0.2778	-1.09448	-1.02169	-1.34801	-1.28275	-1.2398	-1.21372	-1.17356
hsa-miR-425-5p	400	0.0107141	0.0392489	0.049963	0.0649893	0.21444	0.78556	0.514851	1.56836	5.56836	5.79058	5.72724	4.70798	8	57	0.000183166	12.1621	11.929	11.9851	11.7385	11.8626	11.7983	12.0244	11.9316	11.5386	1.53447	0.240963	0.552084	-0.816233	-0.127329	-0.484058	0.770301	0.255232	-1.92543	-0.233113	-0.177043	-0.423638	-0.299486	-0.363774	-0.137717	-0.230541	-0.623535	-1.17537	-1.13056	-1.34131	-1.23071	-1.28679	-1.10016	-1.17328
hsa-miR-4281	401	0.00114867	0.283337	0.284486	0.265459	0.00403771	0.995962	0.0676326	106.382	110.382	110.604	110.541	0.463938	8	57	0.876297	2.93823	3.07555	3.08582	3.0475	3.00641	3.00701	3.05513	3.48571	2.79996	-0.639094	0.107966	0.163871	-0.0446399	-0.268176	-0.264916	-0.00311255	2.33946	-1.39136	0.137314	0.14759	0.109264	0.0681771	0.0687762	0.116897	0.547476	-0.13827	1.09986	1.10772	1.07868	1.04839	1.04883	1.0844	1.46153
hsa-miR-4286	402	0.0540755	0.20435	0.258425	0.273435	0.20925	0.79075	0.399099	95.4653	99.4653	99.6875	99.6241	1.4929	8	57	0.180208	3.54228	3.51649	3.38202	3.82668	3.88779	3.54183	3.46574	3.25885	2.93766	0.203431	0.112827	-0.359559	1.2026	1.41726	0.201864	-0.0654563	-0.7923	-1.92067	-0.0257901	-0.160253	0.284407	0.345511	-0.000446208	-0.0765376	-0.28343	-0.604614	-1.01804	-1.11748	1.21791	1.2706	-1.00031	-1.05448	-1.21709
hsa-miR-429	403	0	0.217506	0.217506	0.199342	0	1	0.0431716	91.0871	93.0871	93.1598	93.1666	0.321476	8	57	0.954598	2.93786	3.07555	3.08582	3.0475	3.00641	2.82458	3.05306	3.1372	2.79955	-0.495337	0.669853	0.756813	0.432476	0.0847671	-1.454	0.479561	1.19165	-1.66578	0.137686	0.147961	0.109636	0.0685484	-0.113281	0.1152	0.199344	-0.138306	1.10014	1.108	1.07896	1.04866	-1.08169	1.08312	1.14818
hsa-miR-4298	404	0	0.211852	0.211852	0.194439	0	1	0.0445463	89.5858	91.5858	91.6585	91.6652	0.33219	8	57	0.95005	2.93786	3.07555	3.08582	3.0475	3.0236	2.82458	3.05306	3.1372	2.79955	-0.510115	0.651923	0.738647	0.415188	0.213482	-1.46619	0.462146	1.17231	-1.67739	0.137686	0.147961	0.109636	0.0857364	-0.113281	0.1152	0.199344	-0.138306	1.10014	1.108	1.07896	1.06123	-1.08169	1.08312	1.14818
hsa-miR-4301	405	0	0.190198	0.190198	0.178873	0	1	0.0675554	83.4401	85.4401	85.5128	85.5195	0.516205	8	57	0.839342	2.93786	3.07555	3.08582	3.0475	3.16429	2.82458	3.05306	3.17158	2.79955	-0.590289	0.426993	0.502914	0.219748	1.08266	-1.42726	0.260856	1.13654	-1.61215	0.137686	0.147961	0.109636	0.226428	-0.113281	0.1152	0.23372	-0.138306	1.10014	1.108	1.07896	1.16993	-1.08169	1.08312	1.17586
hsa-miR-4304	406	0.0648846	0.406339	0.471223	0.754755	0.137694	0.862306	0.560281	132.456	136.456	136.678	136.615	6.69449	8	57	3.78431e-06	3.6658	3.43173	3.33483	4.94264	4.86019	3.9319	3.86895	3.50157	4.20173	-0.515123	-0.910145	-1.07367	1.63968	1.50055	-0.0660411	-0.172286	-0.792276	0.389315	-0.234072	-0.330971	1.27684	1.19439	0.266105	0.203149	-0.164228	0.535928	-1.17615	-1.25786	2.42307	2.28848	1.20256	1.15121	-1.12057
hsa-miR-4306	407	0	0.217506	0.217506	0.199342	0	1	0.0431716	91.0871	93.0871	93.1598	93.1666	0.321476	8	57	0.954598	2.93786	3.07555	3.08582	3.0475	3.00641	2.82458	3.05306	3.1372	2.79955	-0.495337	0.669853	0.756813	0.432476	0.0847671	-1.454	0.479561	1.19165	-1.66578	0.137686	0.147961	0.109636	0.0685484	-0.113281	0.1152	0.199344	-0.138306	1.10014	1.108	1.07896	1.04866	-1.08169	1.08312	1.14818
hsa-miR-431-3p	408	0	0.217506	0.217506	0.199342	0	1	0.0431716	91.0871	93.0871	93.1598	93.1666	0.321476	8	57	0.954598	2.93786	3.07555	3.08582	3.0475	3.00641	2.82458	3.05306	3.1372	2.79955	-0.495337	0.669853	0.756813	0.432476	0.0847671	-1.454	0.479561	1.19165	-1.66578	0.137686	0.147961	0.109636	0.0685484	-0.113281	0.1152	0.199344	-0.138306	1.10014	1.108	1.07896	1.04866	-1.08169	1.08312	1.14818
hsa-miR-431-5p	409	0.302907	0.174945	0.477852	0.704156	0.633893	0.366107	0.807058	97.5133	101.513	101.736	101.672	11.0621	8	57	2.85974e-09	4.89052	4.96089	5.03689	5.04225	5.09933	4.11655	4.07172	3.58833	3.24433	0.621132	0.720373	0.827555	0.835119	0.915619	-0.470392	-0.533606	-1.21533	-1.70047	0.0703696	0.14637	0.151734	0.208814	-0.773974	-0.818798	-1.30219	-1.64619	1.04999	1.10678	1.1109	1.15574	-1.70997	-1.76394	-2.46603
hsa-miR-4325	410	0	0.217506	0.217506	0.199342	0	1	0.0431716	91.0871	93.0871	93.1598	93.1666	0.321476	8	57	0.954598	2.93786	3.07555	3.08582	3.0475	3.00641	2.82458	3.05306	3.1372	2.79955	-0.495337	0.669853	0.756813	0.432476	0.0847671	-1.454	0.479561	1.19165	-1.66578	0.137686	0.147961	0.109636	0.0685484	-0.113281	0.1152	0.199344	-0.138306	1.10014	1.108	1.07896	1.04866	-1.08169	1.08312	1.14818
hsa-miR-432-5p	411	0.303239	0.112529	0.415768	0.62142	0.729347	0.270653	0.859827	75.2845	79.2845	79.5068	79.4434	15.364	8	57	9.36942e-12	5.1943	5.28019	5.45044	5.21356	5.3226	4.49911	4.1997	4.06528	3.90154	0.651712	0.790804	1.0665	0.682897	0.859483	-0.47408	-0.958937	-1.17661	-1.44177	0.0858919	0.256138	0.0192575	0.128302	-0.695196	-0.994604	-1.12902	-1.29276	1.06134	1.19428	1.01344	1.09301	-1.6191	-1.99253	-2.1871
hsa-miR-4422	412	0	0.217506	0.217506	0.199342	0	1	0.0431716	91.0871	93.0871	93.1598	93.1666	0.321476	8	57	0.954598	2.93786	3.07555	3.08582	3.0475	3.00641	2.82458	3.05306	3.1372	2.79955	-0.495337	0.669853	0.756813	0.432476	0.0847671	-1.454	0.479561	1.19165	-1.66578	0.137686	0.147961	0.109636	0.0685484	-0.113281	0.1152	0.199344	-0.138306	1.10014	1.108	1.07896	1.04866	-1.08169	1.08312	1.14818
hsa-miR-4429	413	0	0.217506	0.217506	0.199342	0	1	0.0431716	91.0871	93.0871	93.1598	93.1666	0.321476	8	57	0.954598	2.93786	3.07555	3.08582	3.0475	3.00641	2.82458	3.05306	3.1372	2.79955	-0.495337	0.669853	0.756813	0.432476	0.0847671	-1.454	0.479561	1.19165	-1.66578	0.137686	0.147961	0.109636	0.0685484	-0.113281	0.1152	0.199344	-0.138306	1.10014	1.108	1.07896	1.04866	-1.08169	1.08312	1.14818
hsa-miR-4446-3p	414	0.0773979	0.197476	0.274874	0.322395	0.281576	0.718424	0.512718	95.4874	99.4874	99.7096	99.6463	3.66646	8	57	0.0016492	3.60897	3.56353	3.61601	3.64105	3.7079	2.94033	3.09795	3.02285	2.50379	0.730574	0.623034	0.74722	0.806495	0.964693	-0.85181	-0.47879	-0.656514	-1.8849	-0.0454414	0.00703382	0.0320805	0.098928	-0.668644	-0.511023	-0.586121	-1.10518	-1.032	1.00489	1.02249	1.07098	-1.58958	-1.42506	-1.5012
hsa-miR-4454	415	0.0516277	0.061618	0.113246	0.104069	0.455891	0.544109	0.536161	33.4443	37.4443	37.6666	37.6032	0.46936	8	57	0.872635	7.28807	7.19128	7.12724	7.19097	7.28643	7.23057	7.30894	7.18912	7.30526	0.815802	-0.681095	-1.67141	-0.685799	0.790448	-0.0734734	1.13845	-0.714519	1.08159	-0.0967961	-0.160834	-0.0971003	-0.00163948	-0.0575046	0.020864	-0.0989574	0.0171871	-1.0694	-1.11793	-1.06962	-1.00114	-1.04066	1.01457	-1.071
hsa-miR-4469	416	0	0.173979	0.173979	0.169335	0	1	0.0990283	78.3596	80.3596	80.4323	80.439	0.783128	8	57	0.619271	2.93786	3.07555	3.08582	3.13781	3.35733	3.0227	3.15055	3.1372	2.79955	-0.909464	-0.0176034	0.0489573	0.385677	1.80765	-0.359918	0.468261	0.381789	-1.80534	0.137686	0.147961	0.199944	0.419468	0.0848389	0.212693	0.199344	-0.138306	1.10014	1.108	1.14865	1.33743	1.06057	1.15885	1.14818
hsa-miR-4483	417	0.00330122	0.211321	0.214623	0.199802	0.0153815	0.984618	0.0851656	90.2674	94.2674	94.4896	94.4263	0.460257	8	57	0.878759	2.93924	3.07555	3.08582	3.0475	3.00641	2.82458	3.05791	3.29469	3.05897	-0.828202	0.255543	0.337244	0.0325198	-0.294164	-1.73989	0.115324	1.99791	0.123709	0.136304	0.146579	0.108254	0.0671665	-0.114663	0.118668	0.355443	0.119723	1.09909	1.10694	1.07792	1.04766	-1.08272	1.08573	1.27938
hsa-miR-4485-3p	418	0	0.217506	0.217506	0.199342	0	1	0.0431716	91.0871	93.0871	93.1598	93.1666	0.321476	8	57	0.954598	2.93786	3.07555	3.08582	3.0475	3.00641	2.82458	3.05306	3.1372	2.79955	-0.495337	0.669853	0.756813	0.432476	0.0847671	-1.454	0.479561	1.19165	-1.66578	0.137686	0.147961	0.109636	0.0685484	-0.113281	0.1152	0.199344	-0.138306	1.10014	1.108	1.07896	1.04866	-1.08169	1.08312	1.14818
hsa-miR-449a	419	1.05515	0.164069	1.21922	1.04132	0.865431	0.134569	0.878471	102.681	106.681	106.903	106.84	1.02142	8	57	0.430737	3.47363	3.65747	3.63994	3.78579	3.56821	3.34562	3.44802	3.78207	3.30623	-0.471153	0.576174	0.476343	1.30722	0.0676915	-1.20042	-0.617052	1.28602	-1.42482	0.183838	0.166314	0.312158	0.0945836	-0.128008	-0.0256097	0.308437	-0.167398	1.1359	1.12219	1.24156	1.06776	-1.09278	-1.01791	1.23837
hsa-miR-4500	420	0	0.217506	0.217506	0.199342	0	1	0.0431716	91.0871	93.0871	93.1598	93.1666	0.321476	8	57	0.954598	2.93786	3.07555	3.08582	3.0475	3.00641	2.82458	3.05306	3.1372	2.79955	-0.495337	0.669853	0.756813	0.432476	0.0847671	-1.454	0.479561	1.19165	-1.66578	0.137686	0.147961	0.109636	0.0685484	-0.113281	0.1152	0.199344	-0.138306	1.10014	1.108	1.07896	1.04866	-1.08169	1.08312	1.14818
hsa-miR-4508	421	0	0.217506	0.217506	0.199342	0	1	0.0431716	91.0871	93.0871	93.1598	93.1666	0.321476	8	57	0.954598	2.93786	3.07555	3.08582	3.0475	3.00641	2.82458	3.05306	3.1372	2.79955	-0.495337	0.669853	0.756813	0.432476	0.0847671	-1.454	0.479561	1.19165	-1.66578	0.137686	0.147961	0.109636	0.0685484	-0.113281	0.1152	0.199344	-0.138306	1.10014	1.108	1.07896	1.04866	-1.08169	1.08312	1.14818
hsa-miR-450a-1-3p	422	0	0.213492	0.213492	0.195878	0	1	0.0442191	90.0255	92.0255	92.0983	92.105	0.329637	8	57	0.951155	2.93786	3.07555	3.08582	3.0475	3.0236	2.82458	3.05306	3.1372	2.79955	-0.510115	0.651923	0.738647	0.415188	0.213482	-1.46619	0.462146	1.17231	-1.67739	0.137686	0.147961	0.109636	0.0857364	-0.113281	0.1152	0.199344	-0.138306	1.10014	1.108	1.07896	1.06123	-1.08169	1.08312	1.14818
hsa-miR-450b-5p	423	0.000674251	0.154962	0.155636	0.164138	0.00433223	0.995668	0.175523	72.0012	76.0012	76.2234	76.1601	1.44699	8	57	0.197365	2.9381	3.07555	3.1465	3.1813	3.47872	3.2347	3.13484	3.23193	2.80301	-1.03573	-0.316659	0.0545603	0.236601	1.79269	0.516001	-0.0064262	0.501514	-1.74255	0.137442	0.208396	0.243191	0.540618	0.296595	0.196739	0.293826	-0.135098	1.09995	1.1554	1.18361	1.4546	1.22824	1.14611	1.22589
hsa-miR-4510	424	0	0.305757	0.305757	0.289071	0	1	0.0724594	110.499	112.499	112.572	112.579	0.556604	8	57	0.808575	3.05934	3.44431	3.42279	3.1535	3.35292	3.23975	3.15998	3.1372	3.06259	-1.12673	1.47867	1.33306	-0.48947	0.860188	0.094262	-0.445557	-0.599727	-1.10471	0.384973	0.363458	0.0941608	0.293586	0.180413	0.100649	0.0778693	0.00325372	1.30584	1.28651	1.06744	1.22568	1.13321	1.07226	1.05546
hsa-miR-4515	425	0	0.200138	0.200138	0.184593	0	1	0.0492312	86.3436	88.3436	88.4164	88.4231	0.368936	8	57	0.932695	2.93786	3.07555	3.08582	3.0475	3.06709	2.82458	3.05306	3.1372	2.79955	-0.541619	0.600845	0.686109	0.368098	0.530658	-1.48159	0.414265	1.11246	-1.68923	0.137686	0.147961	0.109636	0.129227	-0.113281	0.1152	0.199344	-0.138306	1.10014	1.108	1.07896	1.09371	-1.08169	1.08312	1.14818
hsa-miR-451a	426	0.0545977	0.0903567	0.144954	0.140781	0.376654	0.623346	0.494298	53.3236	57.3236	57.5459	57.4825	2.00895	8	57	0.0615707	14.818	14.7842	14.9585	14.7043	14.8336	14.9116	15.2379	15.1346	15.0698	-0.68451	-0.875287	0.109098	-1.32702	-0.596286	-0.155914	1.6879	1.1041	0.737915	-0.0337672	0.140468	-0.113723	0.0156156	0.0935608	0.419914	0.316582	0.251767	-1.02368	1.10226	-1.08202	1.01088	1.067	1.33785	1.24538
hsa-miR-451b	427	0.0280172	0.0853	0.113317	0.125445	0.247246	0.752754	0.456574	46.725	50.725	50.9472	50.8839	1.5992	8	57	0.145463	4.43735	4.57982	4.72348	4.54736	4.56798	4.59934	4.70177	4.67484	3.8555	-0.315583	0.223025	0.766159	0.100302	0.178283	0.296813	0.684055	0.582255	-2.51531	0.142467	0.286132	0.110006	0.130633	0.161985	0.264415	0.237488	-0.581851	1.10379	1.21937	1.07923	1.09477	1.11883	1.20115	1.17894
hsa-miR-454-3p	428	0.0376136	0.0188447	0.0564583	0.0513859	0.666219	0.333781	0.715536	-28.5648	-24.5648	-24.3426	-24.4059	0.52782	8	57	0.830671	9.70922	9.68445	9.67583	9.78869	9.74548	9.73818	9.70504	9.71565	9.64303	-0.0587521	-0.638957	-0.840871	1.80271	0.790637	0.619472	-0.156798	0.0917858	-1.60922	-0.024769	-0.0333888	0.0794661	0.0362606	0.0289535	-0.00418561	0.0064265	-0.06619	-1.01732	-1.02341	1.05663	1.02545	1.02027	-1.00291	1.00446
hsa-miR-454-5p	429	0.0103262	0.116169	0.126495	0.143929	0.0816331	0.918367	0.328207	59.0905	63.0905	63.3127	63.2494	2.2352	8	57	0.0377457	3.34435	3.35963	3.6844	3.34067	3.61859	3.096	3.35482	3.5868	3.12933	-0.224331	-0.150064	1.42829	-0.24222	1.10845	-1.43129	-0.173473	0.953947	-1.2693	0.0152815	0.340053	-0.00368084	0.27424	-0.248352	0.0104648	0.242449	-0.215019	1.01065	1.2658	-1.00255	1.20936	-1.18785	1.00728	1.183
hsa-miR-455-5p	430	0.00127944	0.231686	0.232965	0.209718	0.00549196	0.994508	0.0362562	94.9899	98.9899	99.2121	99.1488	0.193865	8	57	0.990738	2.93834	3.07555	3.08582	3.0475	3.00641	2.92027	3.05539	3.14197	2.79784	-0.657005	0.643144	0.740518	0.37734	-0.0120098	-0.828267	0.452149	1.27257	-1.98844	0.137202	0.147478	0.109152	0.068065	-0.018073	0.117047	0.203625	-0.140504	1.09977	1.10763	1.07859	1.04831	-1.01261	1.08451	1.15159
hsa-miR-4632-5p	431	0	0.198305	0.198305	0.182074	0	1	0.0449012	85.8192	87.8192	87.8919	87.8986	0.334961	8	57	0.948835	2.93786	3.07555	3.08582	3.0475	3.05372	2.84177	3.05306	3.1372	2.79955	-0.563314	0.617229	0.705335	0.376725	0.430113	-1.38724	0.42443	1.1459	-1.74918	0.137686	0.147961	0.109636	0.115862	-0.0960935	0.1152	0.199344	-0.138306	1.10014	1.108	1.07896	1.08362	-1.06888	1.08312	1.14818
hsa-miR-4649-3p	432	0	0.217506	0.217506	0.199342	0	1	0.0431716	91.0871	93.0871	93.1598	93.1666	0.321476	8	57	0.954598	2.93786	3.07555	3.08582	3.0475	3.00641	2.82458	3.05306	3.1372	2.79955	-0.495337	0.669853	0.756813	0.432476	0.0847671	-1.454	0.479561	1.19165	-1.66578	0.137686	0.147961	0.109636	0.0685484	-0.113281	0.1152	0.199344	-0.138306	1.10014	1.108	1.07896	1.04866	-1.08169	1.08312	1.14818
hsa-miR-4664-5p	433	0	0.217506	0.217506	0.199342	0	1	0.0431716	91.0871	93.0871	93.1598	93.1666	0.321476	8	57	0.954598	2.93786	3.07555	3.08582	3.0475	3.00641	2.82458	3.05306	3.1372	2.79955	-0.495337	0.669853	0.756813	0.432476	0.0847671	-1.454	0.479561	1.19165	-1.66578	0.137686	0.147961	0.109636	0.0685484	-0.113281	0.1152	0.199344	-0.138306	1.10014	1.108	1.07896	1.04866	-1.08169	1.08312	1.14818
hsa-miR-4670-5p	434	0	0.217506	0.217506	0.199342	0	1	0.0431716	91.0871	93.0871	93.1598	93.1666	0.321476	8	57	0.954598	2.93786	3.07555	3.08582	3.0475	3.00641	2.82458	3.05306	3.1372	2.79955	-0.495337	0.669853	0.756813	0.432476	0.0847671	-1.454	0.479561	1.19165	-1.66578	0.137686	0.147961	0.109636	0.0685484	-0.113281	0.1152	0.199344	-0.138306	1.10014	1.108	1.07896	1.04866	-1.08169	1.08312	1.14818
hsa-miR-4676-3p	435	0	0.217506	0.217506	0.199342	0	1	0.0431716	91.0871	93.0871	93.1598	93.1666	0.321476	8	57	0.954598	2.93786	3.07555	3.08582	3.0475	3.00641	2.82458	3.05306	3.1372	2.79955	-0.495337	0.669853	0.756813	0.432476	0.0847671	-1.454	0.479561	1.19165	-1.66578	0.137686	0.147961	0.109636	0.0685484	-0.113281	0.1152	0.199344	-0.138306	1.10014	1.108	1.07896	1.04866	-1.08169	1.08312	1.14818
hsa-miR-4677-3p	436	0	0.217506	0.217506	0.199342	0	1	0.0431716	91.0871	93.0871	93.1598	93.1666	0.321476	8	57	0.954598	2.93786	3.07555	3.08582	3.0475	3.00641	2.82458	3.05306	3.1372	2.79955	-0.495337	0.669853	0.756813	0.432476	0.0847671	-1.454	0.479561	1.19165	-1.66578	0.137686	0.147961	0.109636	0.0685484	-0.113281	0.1152	0.199344	-0.138306	1.10014	1.108	1.07896	1.04866	-1.08169	1.08312	1.14818
hsa-miR-4732-3p	437	0.0896691	0.135719	0.225388	0.271262	0.397844	0.602156	0.606457	77.033	81.033	81.2552	81.1918	5.0765	8	57	8.63882e-05	4.5349	4.43511	4.27517	4.94731	4.99555	4.39079	4.38982	3.90515	4.23361	0.229891	-0.0622806	-0.530515	1.43726	1.57849	-0.192024	-0.194861	-1.61378	-0.652175	-0.0997984	-0.259736	0.412405	0.460649	-0.144115	-0.145085	-0.629753	-0.301291	-1.07162	-1.19726	1.3309	1.37616	-1.10505	-1.1058	-1.5473
hsa-miR-4738-3p	438	0	0.217506	0.217506	0.199342	0	1	0.0431716	91.0871	93.0871	93.1598	93.1666	0.321476	8	57	0.954598	2.93786	3.07555	3.08582	3.0475	3.00641	2.82458	3.05306	3.1372	2.79955	-0.495337	0.669853	0.756813	0.432476	0.0847671	-1.454	0.479561	1.19165	-1.66578	0.137686	0.147961	0.109636	0.0685484	-0.113281	0.1152	0.199344	-0.138306	1.10014	1.108	1.07896	1.04866	-1.08169	1.08312	1.14818
hsa-miR-4745-5p	439	0.0683639	0.220542	0.288906	0.285709	0.23663	0.76337	0.38213	100.58	104.58	104.802	104.739	1.14406	8	57	0.348839	3.3738	3.34894	3.43964	3.27668	3.45453	3.81816	3.51558	3.33465	2.73921	0.0247081	-0.0630388	0.257094	-0.318049	0.309629	1.593	0.525087	-0.113469	-2.21496	-0.0248622	0.0658442	-0.0971166	0.0807292	0.444359	0.141777	-0.0391509	-0.634587	-1.01738	1.0467	-1.06963	1.05755	1.36071	1.10326	-1.02751
hsa-miR-4749-3p	440	0	0.217506	0.217506	0.199342	0	1	0.0431716	91.0871	93.0871	93.1598	93.1666	0.321476	8	57	0.954598	2.93786	3.07555	3.08582	3.0475	3.00641	2.82458	3.05306	3.1372	2.79955	-0.495337	0.669853	0.756813	0.432476	0.0847671	-1.454	0.479561	1.19165	-1.66578	0.137686	0.147961	0.109636	0.0685484	-0.113281	0.1152	0.199344	-0.138306	1.10014	1.108	1.07896	1.04866	-1.08169	1.08312	1.14818
hsa-miR-4766-3p	441	0.226763	0.175343	0.402107	0.353796	0.563938	0.436062	0.61399	95.7608	99.7608	99.983	99.9196	1.20689	8	57	0.311558	3.93204	3.63563	3.90431	3.52388	3.59547	3.81422	3.83647	4.03428	3.78961	0.870484	-0.885529	0.706219	-1.54757	-1.12342	0.172532	0.304352	1.4762	0.0267325	-0.29641	-0.0277273	-0.408161	-0.336565	-0.117812	-0.0955614	0.102244	-0.142423	-1.22808	-1.0194	-1.32699	-1.26275	-1.08509	-1.06848	1.07344
hsa-miR-4766-5p	442	0.0188363	0.136888	0.155724	0.14611	0.120959	0.879041	0.231086	69.8761	73.8761	74.0983	74.035	0.614277	8	57	0.762189	3.15967	3.09273	3.13314	3.12062	3.03929	2.84177	3.06577	3.19095	2.92182	0.84793	0.261649	0.615512	0.505862	-0.206461	-1.93647	0.0254759	1.12185	-1.23534	-0.0669376	-0.0265359	-0.0390551	-0.120383	-0.317905	-0.0939023	0.031274	-0.237854	-1.04749	-1.01856	-1.02744	-1.08702	-1.24652	-1.06725	1.02191
hsa-miR-4781-3p	443	0	0.217506	0.217506	0.199342	0	1	0.0431716	91.0871	93.0871	93.1598	93.1666	0.321476	8	57	0.954598	2.93786	3.07555	3.08582	3.0475	3.00641	2.82458	3.05306	3.1372	2.79955	-0.495337	0.669853	0.756813	0.432476	0.0847671	-1.454	0.479561	1.19165	-1.66578	0.137686	0.147961	0.109636	0.0685484	-0.113281	0.1152	0.199344	-0.138306	1.10014	1.108	1.07896	1.04866	-1.08169	1.08312	1.14818
hsa-miR-4784	444	0.0416002	0.343823	0.385423	1.26015	0.107934	0.892066	0.775134	121.915	125.915	126.138	126.074	21.7646	8	57	9.84162e-15	3.69247	3.28485	3.13314	5.723	5.61624	5.01606	4.51542	3.87289	4.57723	-0.72216	-1.14953	-1.3086	1.40676	1.29483	0.665569	0.140662	-0.532999	0.205466	-0.407617	-0.559335	2.03053	1.92377	1.32359	0.822945	0.180418	0.884754	-1.32649	-1.47359	4.08554	3.79413	2.50289	1.76901	1.13321
hsa-miR-4785	445	0	0.217506	0.217506	0.199342	0	1	0.0431716	91.0871	93.0871	93.1598	93.1666	0.321476	8	57	0.954598	2.93786	3.07555	3.08582	3.0475	3.00641	2.82458	3.05306	3.1372	2.79955	-0.495337	0.669853	0.756813	0.432476	0.0847671	-1.454	0.479561	1.19165	-1.66578	0.137686	0.147961	0.109636	0.0685484	-0.113281	0.1152	0.199344	-0.138306	1.10014	1.108	1.07896	1.04866	-1.08169	1.08312	1.14818
hsa-miR-4787-5p	446	0	0.217506	0.217506	0.199342	0	1	0.0431716	91.0871	93.0871	93.1598	93.1666	0.321476	8	57	0.954598	2.93786	3.07555	3.08582	3.0475	3.00641	2.82458	3.05306	3.1372	2.79955	-0.495337	0.669853	0.756813	0.432476	0.0847671	-1.454	0.479561	1.19165	-1.66578	0.137686	0.147961	0.109636	0.0685484	-0.113281	0.1152	0.199344	-0.138306	1.10014	1.108	1.07896	1.04866	-1.08169	1.08312	1.14818
hsa-miR-4796-3p	447	0	0.211852	0.211852	0.194439	0	1	0.0445463	89.5858	91.5858	91.6585	91.6652	0.33219	8	57	0.95005	2.93786	3.07555	3.08582	3.0475	3.0236	2.82458	3.05306	3.1372	2.79955	-0.510115	0.651923	0.738647	0.415188	0.213482	-1.46619	0.462146	1.17231	-1.67739	0.137686	0.147961	0.109636	0.0857364	-0.113281	0.1152	0.199344	-0.138306	1.10014	1.108	1.07896	1.06123	-1.08169	1.08312	1.14818
hsa-miR-484	448	0.0535663	0.0952323	0.148799	0.303858	0.359992	0.640008	0.752706	55.9074	59.9074	60.1296	60.0663	14.7053	8	57	2.1001e-11	9.0701	8.58579	8.26037	9.52603	9.55059	8.97493	8.97395	8.98445	8.10433	0.3554	-0.612574	-1.26296	1.26663	1.31571	0.165185	0.163229	0.184209	-1.57483	-0.484319	-0.809734	0.455926	0.480485	-0.0951728	-0.0961513	-0.0856541	-0.965776	-1.39893	-1.75289	1.37166	1.39521	-1.06819	-1.06892	-1.06117
hsa-miR-485-3p	449	0	0.189051	0.189051	0.21582	0	1	0.231846	83.0953	85.0953	85.168	85.1747	2.15048	8	57	0.0453715	2.93786	3.07555	3.08582	3.45538	3.47564	2.82458	3.05306	3.1372	2.79955	-0.647808	-0.0760094	-0.0333354	1.5014	1.58554	-1.11826	-0.169392	0.180053	-1.22218	0.137686	0.147961	0.517515	0.537776	-0.113281	0.1152	0.199344	-0.138306	1.10014	1.108	1.43149	1.45173	-1.08169	1.08312	1.14818
hsa-miR-485-5p	450	0	0.207197	0.207197	0.190464	0	1	0.0460357	88.3194	90.3194	90.3921	90.3988	0.343833	8	57	0.944842	2.93786	3.07555	3.08582	3.0475	3.03929	2.82458	3.05306	3.1372	2.79955	-0.522479	0.634355	0.720691	0.39868	0.329717	-1.47427	0.445428	1.15241	-1.68453	0.137686	0.147961	0.109636	0.101428	-0.113281	0.1152	0.199344	-0.138306	1.10014	1.108	1.07896	1.07283	-1.08169	1.08312	1.14818
hsa-miR-486-3p	451	0	0.652825	0.652825	0.635929	0	1	0.0997772	153.735	155.735	155.808	155.814	0.789707	8	57	0.613708	11.4704	12.1134	11.7434	11.6534	11.6112	11.8437	11.4682	11.319	12.6205	-0.727851	0.88622	-0.0425767	-0.268487	-0.37439	0.209105	-0.733302	-1.10787	2.15915	0.643019	0.273002	0.183003	0.140813	0.373268	-0.00217154	-0.151394	1.15013	1.56159	1.20832	1.13524	1.10253	1.29528	-1.00151	-1.11064
hsa-miR-486-5p	452	0.0538743	0.0551863	0.109061	0.147252	0.493985	0.506015	0.707068	28.0988	32.0988	32.321	32.2577	7.99694	8	57	3.71208e-07	15.8719	15.6856	15.8082	16.0288	15.9485	15.412	15.4504	15.5064	14.8815	0.705371	0.1805	0.525815	1.14729	0.921066	-0.589935	-0.481822	-0.324178	-2.0841	-0.186357	-0.0637521	0.156904	0.0765833	-0.459904	-0.421518	-0.365545	-0.990414	-1.13789	-1.04518	1.11489	1.05452	-1.37545	-1.33934	-1.28837
hsa-miR-487b-3p	453	0.132803	0.152705	0.285508	0.379608	0.465146	0.534854	0.685044	85.4019	89.4019	89.6241	89.5608	6.77474	8	57	3.26382e-06	3.77187	3.7783	3.98553	4.07099	3.87764	2.93058	3.38121	3.30079	3.12832	0.472081	0.487945	0.999389	1.2103	0.733111	-1.60415	-0.492026	-0.690496	-1.11615	0.00642809	0.213664	0.299127	0.105769	-0.841288	-0.390655	-0.471075	-0.643551	1.00447	1.15963	1.2304	1.07607	-1.79165	-1.31099	-1.38614
hsa-miR-491-5p	454	0.0556557	0.0832829	0.138939	0.193882	0.400578	0.599422	0.662194	49.2645	53.2645	53.4867	53.4234	8.29274	8	57	2.24123e-07	6.19872	6.02511	6.11842	5.76534	5.65546	5.69598	5.41367	5.31594	5.40009	1.43501	0.901142	1.18808	0.102276	-0.235618	-0.111016	-0.979189	-1.27974	-1.02095	-0.173603	-0.0802972	-0.433378	-0.543255	-0.502737	-0.785049	-0.882781	-0.798628	-1.12787	-1.05724	-1.35039	-1.45726	-1.4169	-1.72315	-1.84393
hsa-miR-493-3p	455	0	0.169558	0.169558	0.167241	0	1	0.110929	76.8924	78.8924	78.9651	78.9718	0.888983	8	57	0.531642	3.01963	3.29513	3.17058	3.1905	3.0866	2.82458	3.05306	3.1372	2.79955	-0.270613	1.40606	0.648066	0.769305	0.136985	-1.45765	-0.067148	0.444942	-1.60995	0.275504	0.150953	0.170874	0.0669745	-0.195049	0.0334324	0.117577	-0.220073	1.21042	1.1103	1.12574	1.04752	-1.14476	1.02344	1.08491
hsa-miR-493-5p	456	0.00249209	0.177215	0.179707	0.167976	0.0138676	0.986132	0.0863278	80.1564	84.1564	84.3786	84.3152	0.483105	8	57	0.863166	2.97134	3.07555	3.1187	3.14319	3.00641	2.82458	3.05671	3.14507	2.79678	-0.338481	0.46261	0.794361	0.982604	-0.0688767	-1.46668	0.317788	0.997096	-1.68042	0.104208	0.147363	0.17185	0.0350708	-0.146759	0.0853691	0.173735	-0.174563	1.0749	1.10754	1.1265	1.02461	-1.10708	1.06096	1.12797
hsa-miR-494-3p	457	0	0.217506	0.217506	0.199342	0	1	0.0431716	91.0871	93.0871	93.1598	93.1666	0.321476	8	57	0.954598	2.93786	3.07555	3.08582	3.0475	3.00641	2.82458	3.05306	3.1372	2.79955	-0.495337	0.669853	0.756813	0.432476	0.0847671	-1.454	0.479561	1.19165	-1.66578	0.137686	0.147961	0.109636	0.0685484	-0.113281	0.1152	0.199344	-0.138306	1.10014	1.108	1.07896	1.04866	-1.08169	1.08312	1.14818
hsa-miR-497-5p	458	0	0.232923	0.232923	0.28219	0	1	0.276176	94.9907	96.9907	97.0634	97.0701	2.71855	8	57	0.0130823	3.04886	3.16031	3.37532	3.19676	3.29266	3.32229	3.8474	3.73898	4.43182	-1.00452	-0.75103	-0.261953	-0.668116	-0.449976	-0.382592	0.811829	0.565205	2.14115	0.111444	0.326461	0.147896	0.243799	0.273424	0.798539	0.690113	1.38296	1.08031	1.25393	1.10795	1.18411	1.20867	1.73934	1.61341
hsa-miR-4999-3p	459	0	0.217506	0.217506	0.199342	0	1	0.0431716	91.0871	93.0871	93.1598	93.1666	0.321476	8	57	0.954598	2.93786	3.07555	3.08582	3.0475	3.00641	2.82458	3.05306	3.1372	2.79955	-0.495337	0.669853	0.756813	0.432476	0.0847671	-1.454	0.479561	1.19165	-1.66578	0.137686	0.147961	0.109636	0.0685484	-0.113281	0.1152	0.199344	-0.138306	1.10014	1.108	1.07896	1.04866	-1.08169	1.08312	1.14818
hsa-miR-499a-3p	460	0	0.184058	0.184058	0.172542	0	1	0.0645478	81.5697	83.5697	83.6424	83.6492	0.491637	8	57	0.857158	2.93786	3.07555	3.08582	3.0475	3.12777	2.82458	3.11615	3.1372	2.79955	-0.605622	0.44955	0.528299	0.234586	0.849742	-1.47377	0.760689	0.922077	-1.66555	0.137686	0.147961	0.109636	0.189905	-0.113281	0.178285	0.199344	-0.138306	1.10014	1.108	1.07896	1.14069	-1.08169	1.13154	1.14818
hsa-miR-499a-5p	461	0.38965	0.0889411	0.478591	0.426534	0.81416	0.18584	0.838968	65.1554	69.1554	69.3776	69.3143	2.54725	8	57	0.0190659	5.98239	6.3264	6.03352	6.33762	6.35494	6.29361	6.09145	6.01854	5.67196	-0.62019	0.893015	-0.39529	0.942376	1.01857	0.748794	-0.140434	-0.461148	-1.9857	0.344007	0.0511281	0.355229	0.372551	0.31122	0.109066	0.0361562	-0.31043	1.26928	1.03607	1.27919	1.29464	1.24076	1.07853	1.02538
hsa-miR-499b-3p	462	0	0.207197	0.207197	0.190464	0	1	0.0460357	88.3194	90.3194	90.3921	90.3988	0.343833	8	57	0.944842	2.93786	3.07555	3.08582	3.0475	3.03929	2.82458	3.05306	3.1372	2.79955	-0.522479	0.634355	0.720691	0.39868	0.329717	-1.47427	0.445428	1.15241	-1.68453	0.137686	0.147961	0.109636	0.101428	-0.113281	0.1152	0.199344	-0.138306	1.10014	1.108	1.07896	1.07283	-1.08169	1.08312	1.14818
hsa-miR-5009-5p	463	0	0.217506	0.217506	0.199342	0	1	0.0431716	91.0871	93.0871	93.1598	93.1666	0.321476	8	57	0.954598	2.93786	3.07555	3.08582	3.0475	3.00641	2.82458	3.05306	3.1372	2.79955	-0.495337	0.669853	0.756813	0.432476	0.0847671	-1.454	0.479561	1.19165	-1.66578	0.137686	0.147961	0.109636	0.0685484	-0.113281	0.1152	0.199344	-0.138306	1.10014	1.108	1.07896	1.04866	-1.08169	1.08312	1.14818
hsa-miR-500a-3p	464	0.0626639	0.154706	0.21737	0.277342	0.288283	0.711717	0.556603	81.7489	85.7489	85.9711	85.9078	4.04034	8	57	0.000740571	4.42763	4.44268	4.65104	4.15561	4.51967	4.80165	5.08111	5.11803	4.87899	-0.769178	-0.722416	-0.0749418	-1.61446	-0.483149	0.393071	1.26148	1.37619	0.633404	0.0150485	0.223412	-0.272021	0.0920469	0.374023	0.653484	0.690401	0.451364	1.01049	1.16749	-1.2075	1.06588	1.29596	1.57296	1.61373
hsa-miR-500a-5p	465	0	0.14376	0.14376	0.134001	0	1	0.0592144	67.4845	69.4845	69.5572	69.5639	0.448458	8	57	0.886512	3.10703	3.07555	3.10301	3.1725	3.2356	2.95665	3.21191	3.1372	2.79955	0.134213	-0.0973103	0.104682	0.615751	1.07985	-0.971767	0.905611	0.356182	-2.12721	-0.0314787	-0.00401514	0.0654714	0.128571	-0.150373	0.104882	0.0301796	-0.30747	-1.02206	-1.00279	1.04643	1.09321	-1.10986	1.07541	1.02114
hsa-miR-500b-5p	466	0	0.19873	0.19873	0.181828	0	1	0.0415636	85.9412	87.9412	88.0139	88.0206	0.308983	8	57	0.959604	2.93786	3.07555	3.08582	3.0475	3.05372	2.85746	3.05306	3.1372	2.79955	-0.591622	0.616194	0.706335	0.370133	0.424755	-1.29693	0.418941	1.15708	-1.80488	0.137686	0.147961	0.109636	0.115862	-0.0804021	0.1152	0.199344	-0.138306	1.10014	1.108	1.07896	1.08362	-1.05731	1.08312	1.14818
hsa-miR-501-3p	467	0	0.174182	0.174182	0.163168	0	1	0.0638831	78.4259	80.4259	80.4986	80.5053	0.486229	8	57	0.860977	2.97293	3.07555	3.13589	3.0475	3.0236	2.8977	3.0969	3.30672	2.79955	-0.460386	0.248307	0.665057	0.0545841	-0.110474	-0.979968	0.395779	1.8449	-1.65779	0.102614	0.162957	0.0745645	0.0506651	-0.0752323	0.123967	0.333791	-0.173377	1.07372	1.11958	1.05304	1.03574	-1.05353	1.08973	1.26032
hsa-miR-501-5p	468	0.0149678	0.127824	0.142792	0.18443	0.104823	0.895177	0.428192	65.4041	69.4041	69.6263	69.563	3.7316	8	57	0.00143324	3.10051	3.07555	3.08582	3.64163	3.61799	2.9622	3.12292	3.15309	3.25359	-0.507861	-0.610793	-0.568429	1.723	1.62553	-1.07808	-0.415507	-0.291096	0.123235	-0.0249672	-0.0146915	0.541117	0.517476	-0.138312	0.0224014	0.0525784	0.153079	-1.01746	-1.01024	1.4551	1.43145	-1.10062	1.01565	1.03712
hsa-miR-502-3p	469	0.058351	0.128688	0.187039	0.233822	0.311972	0.688028	0.563693	71.863	75.863	76.0852	76.0219	4.86444	8	57	0.000132895	4.63887	4.68701	4.67899	4.3592	4.65221	5.02688	5.34941	5.16495	5.16401	-0.668842	-0.521867	-0.546347	-1.52265	-0.628122	0.515752	1.50042	0.937254	0.934403	0.0481416	0.040123	-0.279666	0.0133377	0.388014	0.710543	0.526078	0.525144	1.03393	1.0282	-1.21391	1.00929	1.30859	1.63642	1.44001
hsa-miR-502-5p	470	0	0.217506	0.217506	0.199342	0	1	0.0431716	91.0871	93.0871	93.1598	93.1666	0.321476	8	57	0.954598	2.93786	3.07555	3.08582	3.0475	3.00641	2.82458	3.05306	3.1372	2.79955	-0.495337	0.669853	0.756813	0.432476	0.0847671	-1.454	0.479561	1.19165	-1.66578	0.137686	0.147961	0.109636	0.0685484	-0.113281	0.1152	0.199344	-0.138306	1.10014	1.108	1.07896	1.04866	-1.08169	1.08312	1.14818
hsa-miR-503-3p	471	0.172426	0.131473	0.303899	0.340789	0.56738	0.43262	0.69957	79.4371	83.4371	83.6593	83.596	3.88487	8	57	0.00103162	3.11073	3.28755	3.29102	3.54316	3.65953	3.72428	3.40841	3.69592	4.34752	-1.25041	-0.761702	-0.752112	-0.0551757	0.266467	0.445427	-0.427625	0.367054	2.16808	0.176812	0.180281	0.432428	0.548796	0.613543	0.297678	0.585188	1.23679	1.13038	1.1331	1.3495	1.46286	1.53001	1.22916	1.50023
hsa-miR-503-5p	472	1.22728	0.200236	1.42752	1.73568	0.859731	0.140269	0.911005	113.706	117.706	117.928	117.865	13.6532	8	57	7.99656e-11	4.08546	4.24929	4.26869	4.41465	4.96096	5.32665	5.61196	5.38059	6.35821	-1.13894	-0.926019	-0.900804	-0.711122	-0.00113163	0.474127	0.844915	0.544229	1.81474	0.163835	0.183237	0.329191	0.875502	1.2412	1.5265	1.29514	2.27275	1.12026	1.13543	1.25631	1.83465	2.36394	2.88087	2.454
hsa-miR-505-3p	473	0.0092049	0.152366	0.161571	0.154046	0.0569713	0.943029	0.167239	73.5546	77.5546	77.7768	77.7135	0.693701	8	57	0.69544	2.9973	3.10843	3.08582	3.12062	3.18666	3.08695	3.20567	3.45419	2.82724	-0.724334	-0.0640662	-0.198365	0.00836754	0.400768	-0.191668	0.513732	1.99029	-1.73473	0.111128	0.0885247	0.12332	0.189364	0.0896519	0.208377	0.456894	-0.170058	1.08007	1.06328	1.08924	1.14026	1.06411	1.15539	1.37258
hsa-miR-505-5p	474	0	0.195293	0.195293	0.182536	0	1	0.0617941	84.9467	86.9467	87.0195	87.0262	0.469282	8	57	0.872689	2.93786	3.07555	3.08582	3.0475	3.1574	2.82458	3.05306	3.1372	2.79955	-0.579736	0.480193	0.559296	0.26426	1.11028	-1.4518	0.307091	0.954849	-1.64444	0.137686	0.147961	0.109636	0.219535	-0.113281	0.1152	0.199344	-0.138306	1.10014	1.108	1.07896	1.16436	-1.08169	1.08312	1.14818
hsa-miR-5100	475	0	0.13699	0.13699	0.161546	0	1	0.256376	64.735	66.735	66.8077	66.8144	2.45645	8	57	0.0232714	3.02397	3.07555	3.08582	3.57822	3.42522	3.0227	3.05306	3.1372	2.79955	-0.471918	-0.249647	-0.205365	1.91656	1.25723	-0.477382	-0.346547	0.0160612	-1.439	0.0515787	0.0618543	0.554254	0.401254	-0.00126799	0.0290927	0.113237	-0.224413	1.0364	1.04381	1.46841	1.32066	-1.00088	1.02037	1.08165
hsa-miR-510-3p	476	0.0109324	0.244545	0.255478	0.245426	0.042792	0.957208	0.154421	99.9043	103.904	104.127	104.063	0.762076	8	57	0.637137	2.94398	3.24079	3.08582	3.0475	3.00641	2.82458	3.07074	3.42003	2.8011	-0.541443	0.988865	0.189884	-0.00771729	-0.219558	-1.15705	0.112112	1.91304	-1.27813	0.296809	0.141843	0.103518	0.0624307	-0.119399	0.126759	0.476056	-0.142884	1.22842	1.10331	1.07439	1.04422	-1.08628	1.09184	1.39094
hsa-miR-532-3p	477	0.0321648	0.107743	0.139908	0.214028	0.229899	0.770101	0.596629	59.5627	63.5627	63.7849	63.7216	7.4414	8	57	9.79178e-07	3.49275	3.51582	3.32306	4.23434	3.99403	3.75299	3.26861	3.31038	3.3733	-0.272208	-0.20415	-0.772748	1.91531	1.20646	0.495454	-0.933386	-0.810175	-0.624554	0.0230723	-0.169687	0.741585	0.501279	0.260243	-0.224144	-0.182375	-0.119448	1.01612	-1.12481	1.67201	1.41547	1.19768	-1.16808	-1.13475
hsa-miR-532-5p	478	0.0386469	0.0576012	0.0962481	0.107808	0.401534	0.598466	0.579856	28.2721	32.2721	32.4943	32.431	3.95656	8	57	0.000885165	7.44146	7.32449	7.53751	7.16201	7.18616	7.46528	7.57869	7.75922	7.74655	-0.11731	-0.658403	0.327023	-1.41003	-1.29833	-0.00711708	0.517519	1.35264	1.29401	-0.116968	0.0960517	-0.279448	-0.255301	0.0238205	0.137231	0.317759	0.305086	-1.08445	1.06884	-1.21373	-1.19358	1.01665	1.09979	1.24639
hsa-miR-542-3p	479	0.153826	0.261752	0.415577	0.452257	0.370149	0.629851	0.543732	113.79	117.79	118.012	117.949	2.48636	8	57	0.0217935	3.01387	3.22653	3.3775	3.46064	3.91758	3.50487	3.29703	3.62141	3.91833	-1.54954	-0.845577	-0.345836	-0.0706317	1.44197	0.0757862	-0.612209	0.461567	1.44447	0.212659	0.363626	0.446762	0.903704	0.490994	0.283157	0.607534	0.904459	1.15882	1.28666	1.36298	1.87086	1.40541	1.21685	1.52365
hsa-miR-542-5p	480	0	0.211852	0.211852	0.194439	0	1	0.0445463	89.5858	91.5858	91.6585	91.6652	0.33219	8	57	0.95005	2.93786	3.07555	3.08582	3.0475	3.0236	2.82458	3.05306	3.1372	2.79955	-0.510115	0.651923	0.738647	0.415188	0.213482	-1.46619	0.462146	1.17231	-1.67739	0.137686	0.147961	0.109636	0.0857364	-0.113281	0.1152	0.199344	-0.138306	1.10014	1.108	1.07896	1.06123	-1.08169	1.08312	1.14818
hsa-miR-543	481	0	0.217506	0.217506	0.199342	0	1	0.0431716	91.0871	93.0871	93.1598	93.1666	0.321476	8	57	0.954598	2.93786	3.07555	3.08582	3.0475	3.00641	2.82458	3.05306	3.1372	2.79955	-0.495337	0.669853	0.756813	0.432476	0.0847671	-1.454	0.479561	1.19165	-1.66578	0.137686	0.147961	0.109636	0.0685484	-0.113281	0.1152	0.199344	-0.138306	1.10014	1.108	1.07896	1.04866	-1.08169	1.08312	1.14818
hsa-miR-548-3p	482	0.00500034	0.158092	0.163092	0.152552	0.0306596	0.96934	0.113728	74.4795	78.4795	78.7017	78.6384	0.507885	8	57	0.845458	3.01143	3.09273	3.08582	3.0475	3.11929	2.82458	3.14207	3.15204	2.79836	-0.144081	0.472739	0.420296	0.129524	0.674208	-1.56173	0.84703	0.922687	-1.76067	0.0813005	0.0743882	0.0360627	0.107855	-0.186854	0.130634	0.140606	-0.213076	1.05797	1.05291	1.02531	1.07762	-1.13828	1.09477	1.10237
hsa-miR-548a	483	0	0.176696	0.176696	0.16249	0	1	0.0464111	79.2428	81.2428	81.3156	81.3223	0.346773	8	57	0.943484	2.93786	3.07555	3.08582	3.0475	3.11241	2.88526	3.05306	3.1372	2.79955	-0.673175	0.529739	0.619514	0.284676	0.851794	-1.13275	0.333286	1.06843	-1.88151	0.137686	0.147961	0.109636	0.174548	-0.052603	0.1152	0.199344	-0.138306	1.10014	1.108	1.07896	1.12861	-1.03713	1.08312	1.14818
hsa-miR-548ac	484	0.000666688	0.20281	0.203477	0.187257	0.00327648	0.996724	0.0532287	87.2816	91.2816	91.5039	91.4405	0.355646	8	57	0.939281	2.94733	3.07555	3.08582	3.08038	3.00641	2.82458	3.05411	3.13962	2.79836	-0.448252	0.615672	0.700938	0.655746	0.0419767	-1.46683	0.437797	1.14736	-1.68441	0.128216	0.138491	0.133045	0.0590784	-0.122751	0.10678	0.192291	-0.148971	1.09294	1.10075	1.09661	1.0418	-1.08881	1.07682	1.14258
hsa-miR-548ad-5p	485	0.00501491	0.189327	0.194342	0.184032	0.0258046	0.974195	0.117189	84.5232	88.5232	88.7454	88.6821	0.601261	8	57	0.772861	2.94033	3.12286	3.08582	3.13226	3.07953	2.82458	3.0836	3.24697	2.79786	-0.632848	0.58906	0.341109	0.651956	0.298984	-1.40777	0.326264	1.41988	-1.58664	0.182526	0.145487	0.191921	0.139195	-0.115755	0.14327	0.306631	-0.142474	1.13487	1.1061	1.14228	1.10129	-1.08354	1.10441	1.23682
hsa-miR-548ae-3p	486	0.0407452	0.166403	0.207148	0.191782	0.196696	0.803304	0.300762	83.3932	87.3932	87.6155	87.5521	0.534336	8	57	0.825742	3.05995	3.07555	3.24219	3.09481	3.31933	3.1861	3.33674	3.24506	3.26093	-1.36675	-1.21703	0.383081	-1.03206	1.12373	-0.155471	1.29091	0.410598	0.562993	0.0155928	0.182239	0.0348569	0.259374	0.12615	0.276786	0.185104	0.200976	1.01087	1.13464	1.02446	1.19696	1.09138	1.21149	1.1369
hsa-miR-548ae-5p	487	0.000537635	0.157466	0.158004	0.147678	0.00340267	0.996597	0.0680115	72.8641	76.8641	77.0863	77.023	0.472258	8	57	0.870661	2.98333	3.13622	3.08582	3.08038	3.1021	2.84177	3.0539	3.13933	2.79913	-0.330228	0.891361	0.488648	0.445133	0.618716	-1.46133	0.233567	0.91616	-1.80203	0.152891	0.102489	0.0970424	0.118768	-0.141566	0.0705633	0.155995	-0.184207	1.1118	1.07362	1.06958	1.08581	-1.1031	1.05013	1.11419
hsa-miR-548ah-3p	488	0	0.217506	0.217506	0.199342	0	1	0.0431716	91.0871	93.0871	93.1598	93.1666	0.321476	8	57	0.954598	2.93786	3.07555	3.08582	3.0475	3.00641	2.82458	3.05306	3.1372	2.79955	-0.495337	0.669853	0.756813	0.432476	0.0847671	-1.454	0.479561	1.19165	-1.66578	0.137686	0.147961	0.109636	0.0685484	-0.113281	0.1152	0.199344	-0.138306	1.10014	1.108	1.07896	1.04866	-1.08169	1.08312	1.14818
hsa-miR-548aj-3p	489	0.0619107	0.149383	0.211294	0.200015	0.293008	0.706992	0.406667	79.8758	83.8758	84.0981	84.0347	0.881465	8	57	0.5377	3.06751	3.18354	3.2437	3.10818	3.20453	3.14146	3.42944	3.48309	2.92165	-0.7512	-0.0838732	0.262151	-0.517326	0.0368554	-0.325878	1.33041	1.63898	-1.59012	0.116027	0.17619	0.0406633	0.137018	0.07395	0.361927	0.415577	-0.145862	1.08375	1.1299	1.02859	1.09963	1.05259	1.28514	1.33383
hsa-miR-548aj-5p	490	0.102291	0.632981	0.735271	0.72239	0.13912	0.86088	0.284608	157.769	161.769	161.991	161.927	1.09341	8	57	0.381215	3.17772	3.70585	3.67938	3.1813	3.2271	3.60075	3.81731	3.61172	4.69432	-0.974341	0.156332	0.0996627	-0.966691	-0.868624	-0.0686682	0.394957	-0.0451901	2.27256	0.528128	0.501658	0.00357341	0.0493793	0.423032	0.639587	0.433998	1.5166	1.44206	1.41584	1.00248	1.03482	1.34074	1.55788	1.35097
hsa-miR-548an	491	0	0.217506	0.217506	0.199342	0	1	0.0431716	91.0871	93.0871	93.1598	93.1666	0.321476	8	57	0.954598	2.93786	3.07555	3.08582	3.0475	3.00641	2.82458	3.05306	3.1372	2.79955	-0.495337	0.669853	0.756813	0.432476	0.0847671	-1.454	0.479561	1.19165	-1.66578	0.137686	0.147961	0.109636	0.0685484	-0.113281	0.1152	0.199344	-0.138306	1.10014	1.108	1.07896	1.04866	-1.08169	1.08312	1.14818
hsa-miR-548ao-5p	492	0	0.217506	0.217506	0.199342	0	1	0.0431716	91.0871	93.0871	93.1598	93.1666	0.321476	8	57	0.954598	2.93786	3.07555	3.08582	3.0475	3.00641	2.82458	3.05306	3.1372	2.79955	-0.495337	0.669853	0.756813	0.432476	0.0847671	-1.454	0.479561	1.19165	-1.66578	0.137686	0.147961	0.109636	0.0685484	-0.113281	0.1152	0.199344	-0.138306	1.10014	1.108	1.07896	1.04866	-1.08169	1.08312	1.14818
hsa-miR-548ap-3p-548t-3p-548aa	493	0	0.110137	0.110137	0.116747	0	1	0.172727	52.2984	54.2984	54.3711	54.3778	1.48764	8	57	0.182105	3.60038	3.33486	3.49339	3.42023	3.54658	3.29103	3.47064	3.79585	3.06259	0.744488	-0.537397	0.227935	-0.125232	0.484739	-0.748989	0.11813	1.68819	-1.85187	-0.265521	-0.106995	-0.180148	-0.0538027	-0.309349	-0.12974	0.195472	-0.537792	-1.20207	-1.07698	-1.133	-1.038	-1.23915	-1.0941	1.1451
hsa-miR-548aq-3p	494	0.572877	0.11488	0.687757	0.644238	0.832965	0.167035	0.862354	80.6249	84.6249	84.8471	84.7838	5.23291	8	57	6.30706e-05	7.17226	7.35114	7.46182	7.48848	7.76091	7.69917	8.04225	7.84281	7.77766	-1.64994	-0.993438	-0.58726	-0.489389	0.510414	0.283832	1.54292	0.810988	0.57187	0.178883	0.289558	0.316226	0.588652	0.526913	0.869989	0.670553	0.605398	1.13201	1.22227	1.24507	1.50384	1.44084	1.82765	1.59168
hsa-miR-548ar-5p	495	0.0160243	0.213532	0.229556	0.214708	0.0698056	0.930194	0.16792	93.3221	97.3221	97.5443	97.481	0.562664	8	57	0.803823	2.96727	3.18155	3.19182	3.0475	3.00641	2.82458	3.0832	3.18892	2.79611	-0.432342	1.00051	1.06922	0.104112	-0.17064	-1.38654	0.342834	1.0498	-1.57695	0.214272	0.224548	0.080223	0.0391357	-0.142694	0.115922	0.221644	-0.171168	1.16012	1.16841	1.05718	1.0275	-1.10396	1.08367	1.16606
hsa-miR-548as-3p	496	0	0.217506	0.217506	0.199342	0	1	0.0431716	91.0871	93.0871	93.1598	93.1666	0.321476	8	57	0.954598	2.93786	3.07555	3.08582	3.0475	3.00641	2.82458	3.05306	3.1372	2.79955	-0.495337	0.669853	0.756813	0.432476	0.0847671	-1.454	0.479561	1.19165	-1.66578	0.137686	0.147961	0.109636	0.0685484	-0.113281	0.1152	0.199344	-0.138306	1.10014	1.108	1.07896	1.04866	-1.08169	1.08312	1.14818
hsa-miR-548at-3p	497	0	0.217506	0.217506	0.199342	0	1	0.0431716	91.0871	93.0871	93.1598	93.1666	0.321476	8	57	0.954598	2.93786	3.07555	3.08582	3.0475	3.00641	2.82458	3.05306	3.1372	2.79955	-0.495337	0.669853	0.756813	0.432476	0.0847671	-1.454	0.479561	1.19165	-1.66578	0.137686	0.147961	0.109636	0.0685484	-0.113281	0.1152	0.199344	-0.138306	1.10014	1.108	1.07896	1.04866	-1.08169	1.08312	1.14818
hsa-miR-548at-5p	498	0.0360669	0.162983	0.19905	0.182552	0.181195	0.818805	0.278294	81.7504	85.7504	85.9726	85.9093	0.498718	8	57	0.8521	3.29771	3.60043	3.39193	3.37301	3.52076	3.38894	3.47499	3.49554	3.3043	-1.27256	1.6953	-0.348779	-0.534356	0.914165	-0.378187	0.465489	0.666896	-1.20797	0.302728	0.0942277	0.0752986	0.22305	0.0912281	0.177285	0.197828	0.00658889	1.23347	1.06749	1.05358	1.1672	1.06528	1.13075	1.14697
hsa-miR-548au-5p-548c-5p-548o-5p-548am-5p	499	0.022714	0.190177	0.212891	0.199638	0.106693	0.893307	0.214566	88.1174	92.1174	92.3396	92.2763	0.559815	8	57	0.806061	3.32814	3.32912	3.42776	3.29568	3.54683	3.43316	3.13982	3.37627	3.75962	-0.436489	-0.43086	0.136383	-0.623114	0.821069	0.167396	-1.51938	-0.159695	2.04469	0.000978945	0.0996237	-0.0324545	0.218692	0.105017	-0.188317	0.0481352	0.431483	1.00068	1.07149	-1.02275	1.16368	1.07551	-1.13943	1.03393
hsa-miR-548aw	500	0	0.217506	0.217506	0.199342	0	1	0.0431716	91.0871	93.0871	93.1598	93.1666	0.321476	8	57	0.954598	2.93786	3.07555	3.08582	3.0475	3.00641	2.82458	3.05306	3.1372	2.79955	-0.495337	0.669853	0.756813	0.432476	0.0847671	-1.454	0.479561	1.19165	-1.66578	0.137686	0.147961	0.109636	0.0685484	-0.113281	0.1152	0.199344	-0.138306	1.10014	1.108	1.07896	1.04866	-1.08169	1.08312	1.14818
hsa-miR-548az-3p	501	0.0890092	0.125911	0.21492	0.20784	0.414151	0.585849	0.524068	73.1565	77.1565	77.3787	77.3154	1.76313	8	57	0.103694	3.52822	3.67213	3.54212	3.70664	3.86483	3.41176	3.43701	3.20269	3.41804	-0.0167346	0.719184	0.0543302	0.895615	1.70456	-0.612276	-0.483152	-1.68137	-0.580153	0.143913	0.0138972	0.178416	0.336609	-0.116462	-0.0912109	-0.32553	-0.11018	1.1049	1.00968	1.13164	1.26279	-1.08407	-1.06526	-1.25312
hsa-miR-548d-5p	502	0	0.217506	0.217506	0.199342	0	1	0.0431716	91.0871	93.0871	93.1598	93.1666	0.321476	8	57	0.954598	2.93786	3.07555	3.08582	3.0475	3.00641	2.82458	3.05306	3.1372	2.79955	-0.495337	0.669853	0.756813	0.432476	0.0847671	-1.454	0.479561	1.19165	-1.66578	0.137686	0.147961	0.109636	0.0685484	-0.113281	0.1152	0.199344	-0.138306	1.10014	1.108	1.07896	1.04866	-1.08169	1.08312	1.14818
hsa-miR-548g-5p	503	0	0.163037	0.163037	0.155309	0	1	0.0794444	74.6569	76.6569	76.7297	76.7364	0.614891	8	57	0.761682	2.98307	3.07555	3.17058	3.0475	3.17165	2.82458	3.05306	3.1372	2.79955	-0.334939	0.336577	1.02664	0.132903	1.0344	-1.48573	0.173303	0.784287	-1.66744	0.0924808	0.187515	0.0644309	0.188585	-0.158486	0.0699948	0.154139	-0.183511	1.0662	1.1388	1.04567	1.13965	-1.11612	1.04971	1.11276
hsa-miR-548h-3p	504	0	0.189315	0.189315	0.176356	0	1	0.0586353	83.1748	85.1748	85.2476	85.2543	0.443799	8	57	0.889514	2.93786	3.07555	3.08582	3.0475	3.12684	2.82458	3.05306	3.1372	2.79955	-0.570736	0.521996	0.603547	0.29938	0.929112	-1.46979	0.343537	1.01134	-1.66839	0.137686	0.147961	0.109636	0.188983	-0.113281	0.1152	0.199344	-0.138306	1.10014	1.108	1.07896	1.13996	-1.08169	1.08312	1.14818
hsa-miR-548h-5p	505	0.329727	0.121501	0.451228	0.41195	0.730732	0.269268	0.7717	79.7043	83.7043	83.9265	83.8632	1.01034	8	57	0.438711	4.82448	4.7964	4.90023	4.65706	4.53698	4.74078	4.66152	4.94141	5.06878	0.198532	0.0270885	0.661063	-0.823618	-1.55678	-0.312494	-0.796368	0.912465	1.69011	-0.0280803	0.0757571	-0.167416	-0.287499	-0.0836998	-0.162953	0.116934	0.244303	-1.01965	1.05391	-1.12305	-1.22052	-1.05973	-1.11958	1.08443
hsa-miR-548l	506	0	0.164176	0.164176	0.148442	0	1	0.0301318	75.0536	77.0536	77.1264	77.1331	0.221359	8	57	0.98568	2.98063	3.12561	3.08582	3.06468	3.11241	2.98246	3.05306	3.1372	2.79955	-0.541765	0.828866	0.452687	0.252858	0.704032	-0.524482	0.142967	0.938445	-2.25361	0.144983	0.105191	0.0840539	0.131778	0.00182817	0.0724299	0.156574	-0.181076	1.10572	1.07564	1.05999	1.09564	1.00127	1.05149	1.11464
hsa-miR-548u	507	0.732665	0.173089	0.905754	0.856173	0.808901	0.191099	0.843853	102.874	106.874	107.096	107.033	3.29538	8	57	0.00369025	3.55932	3.90093	3.74744	3.91798	4.1871	4.17822	4.26542	4.25983	3.54688	-1.36179	-0.175475	-0.708495	-0.116267	0.818318	0.787481	1.09031	1.07088	-1.40496	0.341609	0.188122	0.358659	0.62778	0.6189	0.706102	0.700509	-0.0124322	1.26717	1.13928	1.28223	1.54519	1.5357	1.63139	1.62508
hsa-miR-548x-5p	508	0.000743089	0.211046	0.211789	0.194066	0.00350863	0.996491	0.0495623	89.5631	93.5631	93.7853	93.722	0.32369	8	57	0.953678	2.94736	3.07555	3.08582	3.0475	3.00641	2.82458	3.05422	3.1399	2.79817	-0.425425	0.657392	0.744193	0.42045	0.0733787	-1.46257	0.477254	1.20102	-1.68569	0.128187	0.138463	0.100137	0.0590498	-0.12278	0.106862	0.192542	-0.149193	1.09292	1.10073	1.07188	1.04178	-1.08883	1.07688	1.14278
hsa-miR-548z	509	0	0.217506	0.217506	0.199342	0	1	0.0431716	91.0871	93.0871	93.1598	93.1666	0.321476	8	57	0.954598	2.93786	3.07555	3.08582	3.0475	3.00641	2.82458	3.05306	3.1372	2.79955	-0.495337	0.669853	0.756813	0.432476	0.0847671	-1.454	0.479561	1.19165	-1.66578	0.137686	0.147961	0.109636	0.0685484	-0.113281	0.1152	0.199344	-0.138306	1.10014	1.108	1.07896	1.04866	-1.08169	1.08312	1.14818
hsa-miR-550a-5p	510	0	0.217506	0.217506	0.199342	0	1	0.0431716	91.0871	93.0871	93.1598	93.1666	0.321476	8	57	0.954598	2.93786	3.07555	3.08582	3.0475	3.00641	2.82458	3.05306	3.1372	2.79955	-0.495337	0.669853	0.756813	0.432476	0.0847671	-1.454	0.479561	1.19165	-1.66578	0.137686	0.147961	0.109636	0.0685484	-0.113281	0.1152	0.199344	-0.138306	1.10014	1.108	1.07896	1.04866	-1.08169	1.08312	1.14818
hsa-miR-550b-2-5p	511	0	0.217506	0.217506	0.199342	0	1	0.0431716	91.0871	93.0871	93.1598	93.1666	0.321476	8	57	0.954598	2.93786	3.07555	3.08582	3.0475	3.00641	2.82458	3.05306	3.1372	2.79955	-0.495337	0.669853	0.756813	0.432476	0.0847671	-1.454	0.479561	1.19165	-1.66578	0.137686	0.147961	0.109636	0.0685484	-0.113281	0.1152	0.199344	-0.138306	1.10014	1.108	1.07896	1.04866	-1.08169	1.08312	1.14818
hsa-miR-551a	512	0	0.217506	0.217506	0.199342	0	1	0.0431716	91.0871	93.0871	93.1598	93.1666	0.321476	8	57	0.954598	2.93786	3.07555	3.08582	3.0475	3.00641	2.82458	3.05306	3.1372	2.79955	-0.495337	0.669853	0.756813	0.432476	0.0847671	-1.454	0.479561	1.19165	-1.66578	0.137686	0.147961	0.109636	0.0685484	-0.113281	0.1152	0.199344	-0.138306	1.10014	1.108	1.07896	1.04866	-1.08169	1.08312	1.14818
hsa-miR-5690	513	0.0308894	0.112502	0.143391	0.172951	0.215421	0.784579	0.477539	61.6197	65.6197	65.8419	65.7786	3.71786	8	57	0.00147629	3.3509	3.15849	3.32476	3.58372	3.57066	3.60281	3.75626	3.93903	4.28683	-0.782253	-1.34308	-0.858444	-0.103631	-0.141698	-0.0479945	0.399281	0.932034	1.94578	-0.192406	-0.0261395	0.23282	0.21976	0.251907	0.405357	0.588133	0.935926	-1.14267	-1.01828	1.17513	1.16454	1.19078	1.32442	1.5033
hsa-miR-5697	514	0	0.217506	0.217506	0.199342	0	1	0.0431716	91.0871	93.0871	93.1598	93.1666	0.321476	8	57	0.954598	2.93786	3.07555	3.08582	3.0475	3.00641	2.82458	3.05306	3.1372	2.79955	-0.495337	0.669853	0.756813	0.432476	0.0847671	-1.454	0.479561	1.19165	-1.66578	0.137686	0.147961	0.109636	0.0685484	-0.113281	0.1152	0.199344	-0.138306	1.10014	1.108	1.07896	1.04866	-1.08169	1.08312	1.14818
hsa-miR-570-5p	515	0	0.217506	0.217506	0.199342	0	1	0.0431716	91.0871	93.0871	93.1598	93.1666	0.321476	8	57	0.954598	2.93786	3.07555	3.08582	3.0475	3.00641	2.82458	3.05306	3.1372	2.79955	-0.495337	0.669853	0.756813	0.432476	0.0847671	-1.454	0.479561	1.19165	-1.66578	0.137686	0.147961	0.109636	0.0685484	-0.113281	0.1152	0.199344	-0.138306	1.10014	1.108	1.07896	1.04866	-1.08169	1.08312	1.14818
hsa-miR-574-3p	516	0.0409842	0.180078	0.221062	0.232159	0.185397	0.814603	0.373514	87.5615	91.5615	91.7837	91.7204	1.63959	8	57	0.133937	4.09436	4.00777	4.09293	4.40555	4.51098	4.29839	4.0836	3.81463	4.21455	-0.351846	-0.758905	-0.358544	1.1112	1.60684	0.607402	-0.402425	-1.66693	0.213213	-0.0865835	-0.00142479	0.311196	0.416622	0.204037	-0.0107584	-0.279725	0.120191	-1.06185	-1.00099	1.24074	1.3348	1.15192	-1.00749	-1.21396
hsa-miR-574-5p	517	0	0.217506	0.217506	0.199342	0	1	0.0431716	91.0871	93.0871	93.1598	93.1666	0.321476	8	57	0.954598	2.93786	3.07555	3.08582	3.0475	3.00641	2.82458	3.05306	3.1372	2.79955	-0.495337	0.669853	0.756813	0.432476	0.0847671	-1.454	0.479561	1.19165	-1.66578	0.137686	0.147961	0.109636	0.0685484	-0.113281	0.1152	0.199344	-0.138306	1.10014	1.108	1.07896	1.04866	-1.08169	1.08312	1.14818
hsa-miR-576-3p	518	0	0.110159	0.110159	0.104605	0	1	0.076515	52.3098	54.3098	54.3826	54.3893	0.590339	8	57	0.781734	3.03123	3.10843	3.1187	3.25726	3.08428	3.0182	3.20357	3.26872	3.28498	-1.17872	-0.430349	-0.330732	1.01247	-0.66447	-1.30508	0.491988	1.12363	1.28126	0.0771957	0.0874713	0.226026	0.0530455	-0.0130344	0.172337	0.237492	0.253751	1.05497	1.06251	1.16961	1.03745	-1.00908	1.12688	1.17894
hsa-miR-576-5p	519	0.0490391	0.143301	0.19234	0.188313	0.254961	0.745039	0.392515	76.5034	80.5034	80.7256	80.6623	1.20243	8	57	0.314103	3.85293	4.13934	4.00766	4.05108	4.26145	3.9573	3.89223	3.73764	4.02293	-0.888739	0.949554	0.104369	0.383114	1.73329	-0.218827	-0.636468	-1.62868	0.202388	0.286411	0.154729	0.198158	0.408519	0.104374	0.0393045	-0.115285	0.170001	1.2196	1.11321	1.14723	1.32732	1.07503	1.02762	-1.08319
hsa-miR-580-5p	520	0	0.217506	0.217506	0.199342	0	1	0.0431716	91.0871	93.0871	93.1598	93.1666	0.321476	8	57	0.954598	2.93786	3.07555	3.08582	3.0475	3.00641	2.82458	3.05306	3.1372	2.79955	-0.495337	0.669853	0.756813	0.432476	0.0847671	-1.454	0.479561	1.19165	-1.66578	0.137686	0.147961	0.109636	0.0685484	-0.113281	0.1152	0.199344	-0.138306	1.10014	1.108	1.07896	1.04866	-1.08169	1.08312	1.14818
hsa-miR-582-3p	521	0	0.125654	0.125654	0.132946	0	1	0.171178	59.8115	61.8115	61.8842	61.8909	1.47154	8	57	0.18802	3.01963	3.15341	3.21082	3.06468	3.47193	3.0932	3.27866	3.35319	2.93706	-0.917279	-0.131713	0.205387	-0.652714	1.7386	-0.485249	0.603741	1.04135	-1.40212	0.133785	0.191194	0.0450564	0.452305	0.0735763	0.259035	0.333561	-0.0825698	1.09717	1.14171	1.03172	1.36822	1.05232	1.19668	1.26012
hsa-miR-582-5p	522	0	0.195251	0.195251	0.180719	0	1	0.0525662	84.9344	86.9344	87.0071	87.0139	0.395314	8	57	0.918622	2.93786	3.07555	3.08582	3.0475	3.09117	2.82458	3.05306	3.1372	2.79955	-0.555294	0.569894	0.653868	0.340666	0.697558	-1.48105	0.386135	1.07377	-1.68555	0.137686	0.147961	0.109636	0.153307	-0.113281	0.1152	0.199344	-0.138306	1.10014	1.108	1.07896	1.11212	-1.08169	1.08312	1.14818
hsa-miR-584-3p	523	0.00384169	0.123143	0.126985	0.126393	0.0302531	0.969747	0.166544	60.2199	64.2199	64.4422	64.3788	1.00292	8	57	0.444103	3.15802	3.12286	3.10301	3.35493	3.41708	3.20973	3.32829	3.12385	2.78825	-0.109981	-0.299284	-0.406163	0.950205	1.28488	0.168417	0.806787	-0.29394	-2.10092	-0.0351589	-0.0550092	0.196906	0.259065	0.0517064	0.17027	-0.0341663	-0.369774	-1.02467	-1.03887	1.14624	1.1967	1.03649	1.12527	-1.02396
hsa-miR-584-5p	524	0.277521	0.029696	0.307217	0.28568	0.903339	0.0966614	0.919889	7.82612	11.8261	12.0483	11.985	11.1823	8	57	2.39884e-09	8.97751	9.03119	8.78158	9.42299	9.33466	9.08792	8.98975	8.8204	8.85857	-0.255158	-0.0120106	-1.14267	1.76276	1.36261	0.244977	-0.19972	-0.966839	-0.793949	0.0536779	-0.19593	0.445481	0.357144	0.110411	0.0122387	-0.157113	-0.118945	1.03791	-1.14546	1.36177	1.28089	1.07954	1.00852	-1.11505
hsa-miR-590-3p	525	0.331325	0.0503446	0.38167	0.357196	0.868094	0.131906	0.891294	35.4999	39.4999	39.7221	39.6588	1.08855	8	57	0.384433	5.86434	6.06237	5.88675	5.89691	6.0096	5.95015	5.90365	6.11493	6.13629	-1.12092	0.78915	-0.9048	-0.806784	0.280131	-0.293243	-0.741832	1.29615	1.50215	0.198022	0.0224056	0.0325671	0.145251	0.0858073	0.0393009	0.250584	0.27194	1.14712	1.01565	1.02283	1.10592	1.06128	1.02762	1.18969
hsa-miR-598-3p	526	0.0318574	0.133374	0.165232	0.181743	0.192804	0.807196	0.40815	70.6677	74.6677	74.89	74.8266	1.9893	8	57	0.0642201	3.59217	3.78675	3.84053	3.32673	3.63114	3.37539	3.42091	3.48477	3.10999	0.365865	1.20759	1.44022	-0.782413	0.53442	-0.571915	-0.374991	-0.0987641	-1.72001	0.194577	0.248353	-0.265442	0.0389639	-0.216782	-0.17126	-0.107406	-0.48218	1.14439	1.18785	-1.202	1.02738	-1.16214	-1.12604	-1.07729
hsa-miR-605-3p	527	0	0.217506	0.217506	0.199342	0	1	0.0431716	91.0871	93.0871	93.1598	93.1666	0.321476	8	57	0.954598	2.93786	3.07555	3.08582	3.0475	3.00641	2.82458	3.05306	3.1372	2.79955	-0.495337	0.669853	0.756813	0.432476	0.0847671	-1.454	0.479561	1.19165	-1.66578	0.137686	0.147961	0.109636	0.0685484	-0.113281	0.1152	0.199344	-0.138306	1.10014	1.108	1.07896	1.04866	-1.08169	1.08312	1.14818
hsa-miR-605-5p	528	0	0.206218	0.206218	0.190229	0	1	0.0493707	88.0496	90.0496	90.1223	90.129	0.370035	8	57	0.932135	2.93786	3.07555	3.08582	3.09481	3.00641	2.82458	3.05306	3.1372	2.79955	-0.524053	0.607091	0.69151	0.765354	0.039101	-1.45471	0.422359	1.11364	-1.66029	0.137686	0.147961	0.15695	0.0685484	-0.113281	0.1152	0.199344	-0.138306	1.10014	1.108	1.11493	1.04866	-1.08169	1.08312	1.14818
hsa-miR-6069	529	0	0.217506	0.217506	0.199342	0	1	0.0431716	91.0871	93.0871	93.1598	93.1666	0.321476	8	57	0.954598	2.93786	3.07555	3.08582	3.0475	3.00641	2.82458	3.05306	3.1372	2.79955	-0.495337	0.669853	0.756813	0.432476	0.0847671	-1.454	0.479561	1.19165	-1.66578	0.137686	0.147961	0.109636	0.0685484	-0.113281	0.1152	0.199344	-0.138306	1.10014	1.108	1.07896	1.04866	-1.08169	1.08312	1.14818
hsa-miR-6081	530	0.00386946	0.176072	0.179942	0.289544	0.021504	0.978496	0.476522	80.1748	84.1748	84.397	84.3337	6.02948	8	57	1.32336e-05	3.24369	3.12561	3.10301	3.81965	4.06268	3.8242	3.33839	3.14092	2.8213	-0.343187	-0.626734	-0.681014	1.0399	1.62349	1.05082	-0.115795	-0.589974	-1.35751	-0.118079	-0.140682	0.575962	0.818988	0.580512	0.0946935	-0.10277	-0.422397	-1.08529	-1.10243	1.49067	1.76417	1.49538	1.06784	-1.07383
hsa-miR-610	531	0.040754	0.0982273	0.138981	0.137292	0.293233	0.706767	0.431628	55.9856	59.9856	60.2078	60.1445	1.36246	8	57	0.232691	3.55615	3.49301	3.49644	3.46892	3.28291	3.3005	3.62038	3.51622	2.89829	0.695751	0.407685	0.42336	0.297802	-0.550818	-0.470576	0.988771	0.51357	-2.30555	-0.0631417	-0.0597057	-0.087227	-0.273237	-0.255649	0.0642274	-0.0399326	-0.657858	-1.04474	-1.04225	-1.06233	-1.20852	-1.19387	1.04552	-1.02807
hsa-miR-6126	532	0.17744	0.319123	0.496562	0.621368	0.357336	0.642664	0.59467	124.769	128.769	128.991	128.928	4.48861	8	57	0.000288444	7.31108	7.10364	6.91948	7.88822	7.8127	8.08964	7.93371	6.98892	7.75741	-0.493371	-0.952766	-1.3606	0.784737	0.617489	1.23081	0.885483	-1.20683	0.495044	-0.207441	-0.3916	0.577134	0.501612	0.77856	0.622626	-0.322163	0.446322	-1.15464	-1.31185	1.49188	1.4158	1.71542	1.53967	-1.2502
hsa-miR-6129	533	0	0.217506	0.217506	0.199342	0	1	0.0431716	91.0871	93.0871	93.1598	93.1666	0.321476	8	57	0.954598	2.93786	3.07555	3.08582	3.0475	3.00641	2.82458	3.05306	3.1372	2.79955	-0.495337	0.669853	0.756813	0.432476	0.0847671	-1.454	0.479561	1.19165	-1.66578	0.137686	0.147961	0.109636	0.0685484	-0.113281	0.1152	0.199344	-0.138306	1.10014	1.108	1.07896	1.04866	-1.08169	1.08312	1.14818
hsa-miR-6130	534	0.000312532	0.254937	0.255249	0.238572	0.00122442	0.998776	0.0640426	100.207	104.207	104.429	104.365	0.469099	8	57	0.872813	3.00068	3.25863	3.1465	3.0475	3.00641	3.20657	3.05353	3.1381	3.72492	-0.781126	0.369012	-0.130956	-0.572399	-0.7556	0.136866	-0.545512	-0.168402	2.44812	0.257945	0.145816	0.046812	0.00572468	0.205881	0.052842	0.137418	0.724233	1.19577	1.10636	1.03298	1.00398	1.15339	1.03731	1.09993
hsa-miR-6134	535	0	0.217506	0.217506	0.199342	0	1	0.0431716	91.0871	93.0871	93.1598	93.1666	0.321476	8	57	0.954598	2.93786	3.07555	3.08582	3.0475	3.00641	2.82458	3.05306	3.1372	2.79955	-0.495337	0.669853	0.756813	0.432476	0.0847671	-1.454	0.479561	1.19165	-1.66578	0.137686	0.147961	0.109636	0.0685484	-0.113281	0.1152	0.199344	-0.138306	1.10014	1.108	1.07896	1.04866	-1.08169	1.08312	1.14818
hsa-miR-616-5p	536	0	0.217506	0.217506	0.199342	0	1	0.0431716	91.0871	93.0871	93.1598	93.1666	0.321476	8	57	0.954598	2.93786	3.07555	3.08582	3.0475	3.00641	2.82458	3.05306	3.1372	2.79955	-0.495337	0.669853	0.756813	0.432476	0.0847671	-1.454	0.479561	1.19165	-1.66578	0.137686	0.147961	0.109636	0.0685484	-0.113281	0.1152	0.199344	-0.138306	1.10014	1.108	1.07896	1.04866	-1.08169	1.08312	1.14818
hsa-miR-619-5p	537	0	0.195691	0.195691	0.176829	0	1	0.0295365	85.0629	87.0629	87.1356	87.1424	0.216853	8	57	0.986605	2.93786	3.07555	3.08582	3.0475	3.00641	2.93058	3.05306	3.1372	2.79955	-0.681029	0.652614	0.752145	0.380919	-0.0170589	-0.751562	0.434811	1.24985	-2.02068	0.137686	0.147961	0.109636	0.0685484	-0.00728179	0.1152	0.199344	-0.138306	1.10014	1.108	1.07896	1.04866	-1.00506	1.08312	1.14818
hsa-miR-624-5p	538	0.132929	0.221523	0.354452	0.32979	0.375027	0.624973	0.470681	104.399	108.399	108.621	108.558	1.09057	8	57	0.383089	4.4465	4.64046	4.62742	4.56092	4.68956	4.84843	4.87933	5.05279	4.77614	-1.50962	-0.456796	-0.527575	-0.888543	-0.190313	0.672038	0.839774	1.78136	0.27968	0.19396	0.180921	0.11442	0.243054	0.401924	0.432825	0.606292	0.32964	1.1439	1.13361	1.08254	1.1835	1.32127	1.34987	1.52234
hsa-miR-627-3p	539	0.00987577	0.100387	0.110262	0.116985	0.089566	0.910434	0.288052	51.0704	55.0704	55.2926	55.2293	1.5999	8	57	0.145257	6.86448	6.77947	6.87981	6.71053	6.57922	7.01682	7.0447	6.84279	7.0905	-0.0187969	-0.53178	0.0737396	-0.94775	-1.74017	0.900526	1.06877	-0.149678	1.34514	-0.0850093	0.0153347	-0.153942	-0.285258	0.152346	0.180227	-0.021689	0.226025	-1.06069	1.01069	-1.11261	-1.21863	1.11138	1.13306	-1.01515
hsa-miR-627-5p	540	0.0332104	0.155025	0.188235	0.187252	0.176431	0.823569	0.330095	78.7531	82.7531	82.9753	82.912	0.988534	8	57	0.45467	6.03191	6.01196	6.00356	5.88258	5.72391	6.02855	5.84524	5.58631	6.13002	0.668473	0.553429	0.504973	-0.192772	-1.10789	0.649097	-0.408145	-1.90151	1.23435	-0.0199469	-0.0283486	-0.149328	-0.307996	-0.00335946	-0.18667	-0.445599	0.0981151	-1.01392	-1.01984	-1.10905	-1.23799	-1.00233	-1.13813	-1.36188
hsa-miR-628-3p	541	0.0309634	0.131005	0.161969	0.156575	0.191169	0.808831	0.324997	69.598	73.598	73.8202	73.7569	1.03886	8	57	0.418366	4.47314	4.44369	4.54119	4.62098	4.51526	4.58106	4.40638	4.12636	3.90765	0.304658	0.178956	0.594999	0.93548	0.484357	0.765111	0.0197826	-1.17506	-2.10828	-0.0294595	0.0680442	0.147839	0.0421142	0.107912	-0.0667632	-0.346786	-0.565495	-1.02063	1.04829	1.10791	1.02962	1.07767	-1.04736	-1.27172
hsa-miR-628-5p	542	0.24144	0.148337	0.389777	0.438247	0.619431	0.380569	0.736992	87.7069	91.7069	91.9291	91.8658	4.75043	8	57	0.000167853	3.6182	3.75043	4.26064	3.93351	4.49978	4.13629	4.06113	3.85069	3.54871	-1.11187	-0.684413	0.964896	-0.0926058	1.73794	0.562904	0.319952	-0.360313	-1.33649	0.132233	0.642441	0.315307	0.881581	0.518086	0.44293	0.232492	-0.0694855	1.09599	1.56097	1.24428	1.84239	1.43205	1.35936	1.17486
hsa-miR-6501-5p	543	0.00749656	0.1934	0.200896	0.186238	0.0373156	0.962684	0.115766	86.2807	90.2807	90.5029	90.4396	0.440361	8	57	0.891707	3.02108	3.09273	3.15894	3.10818	3.07953	2.82458	3.08742	3.16126	2.80011	-0.119235	0.414265	0.907192	0.529222	0.315954	-1.58218	0.374731	0.924419	-1.76437	0.0716576	0.137866	0.0870982	0.0584529	-0.196497	0.0663476	0.14018	-0.220968	1.05092	1.10028	1.06223	1.04135	-1.14591	1.04706	1.10204
hsa-miR-6503-3p	544	0	0.217506	0.217506	0.202109	0	1	0.0562732	91.0871	93.0871	93.1598	93.1666	0.424855	8	57	0.901362	2.93786	3.07555	3.08582	3.0475	3.00641	2.82458	3.05306	3.1372	3.47763	-0.752116	0.0214183	0.0791481	-0.136169	-0.367002	-1.38854	-0.104911	0.367822	2.28035	0.137686	0.147961	0.109636	0.0685484	-0.113281	0.1152	0.199344	0.539766	1.10014	1.108	1.07896	1.04866	-1.08169	1.08312	1.14818
hsa-miR-6505-5p	545	0	0.217506	0.217506	0.199342	0	1	0.0431716	91.0871	93.0871	93.1598	93.1666	0.321476	8	57	0.954598	2.93786	3.07555	3.08582	3.0475	3.00641	2.82458	3.05306	3.1372	2.79955	-0.495337	0.669853	0.756813	0.432476	0.0847671	-1.454	0.479561	1.19165	-1.66578	0.137686	0.147961	0.109636	0.0685484	-0.113281	0.1152	0.199344	-0.138306	1.10014	1.108	1.07896	1.04866	-1.08169	1.08312	1.14818
hsa-miR-652-3p	546	0.0390025	0.0945908	0.133593	0.198889	0.29195	0.70805	0.622122	53.8021	57.8021	58.0243	57.961	7.69603	8	57	6.25446e-07	7.68148	7.53495	7.6634	7.49821	7.45664	7.24042	7.03594	6.6879	6.32647	0.950605	0.637822	0.91202	0.559387	0.470659	0.0091123	-0.42739	-1.17034	-1.94187	-0.146526	-0.0180756	-0.183269	-0.224835	-0.44105	-0.645534	-0.993576	-1.35501	-1.1069	-1.01261	-1.13545	-1.16864	-1.35759	-1.56432	-1.99111
hsa-miR-652-5p	547	0	0.217506	0.217506	0.199342	0	1	0.0431716	91.0871	93.0871	93.1598	93.1666	0.321476	8	57	0.954598	2.93786	3.07555	3.08582	3.0475	3.00641	2.82458	3.05306	3.1372	2.79955	-0.495337	0.669853	0.756813	0.432476	0.0847671	-1.454	0.479561	1.19165	-1.66578	0.137686	0.147961	0.109636	0.0685484	-0.113281	0.1152	0.199344	-0.138306	1.10014	1.108	1.07896	1.04866	-1.08169	1.08312	1.14818
hsa-miR-654-3p	548	0.198685	0.174133	0.372818	0.696303	0.532927	0.467073	0.804931	94.5722	98.5722	98.7944	98.7311	14.6384	8	57	2.28235e-11	5.6867	5.71382	5.86627	5.59868	5.63201	4.59088	4.78884	4.31916	3.18551	0.718016	0.74824	0.918142	0.619919	0.657068	-0.503235	-0.282619	-0.806058	-2.06947	0.0271196	0.179571	-0.0880223	-0.0546881	-1.09582	-0.897863	-1.36754	-2.5012	1.01898	1.13255	-1.06291	-1.03863	-2.13735	-1.8633	-2.58031
hsa-miR-656-3p	549	0	0.217506	0.217506	0.199342	0	1	0.0431716	91.0871	93.0871	93.1598	93.1666	0.321476	8	57	0.954598	2.93786	3.07555	3.08582	3.0475	3.00641	2.82458	3.05306	3.1372	2.79955	-0.495337	0.669853	0.756813	0.432476	0.0847671	-1.454	0.479561	1.19165	-1.66578	0.137686	0.147961	0.109636	0.0685484	-0.113281	0.1152	0.199344	-0.138306	1.10014	1.108	1.07896	1.04866	-1.08169	1.08312	1.14818
hsa-miR-660-5p	550	0.0783313	0.127006	0.205337	0.305124	0.381477	0.618523	0.672171	72.849	76.849	77.0713	77.0079	9.42868	8	57	3.47175e-08	6.37273	6.35967	6.59194	5.97861	6.34256	6.87362	7.17898	7.34218	7.26925	-0.677512	-0.704467	-0.225167	-1.49079	-0.739774	0.356089	0.98619	1.32296	1.17247	-0.0130629	0.21921	-0.394122	-0.0301728	0.500892	0.806244	0.969446	0.896518	-1.0091	1.1641	-1.31414	-1.02113	1.41509	1.74865	1.95809
hsa-miR-664a-3p	551	0.00737868	0.142019	0.149397	0.146042	0.0493896	0.95061	0.177896	69.2202	73.2202	73.4424	73.379	0.859227	8	57	0.55579	3.06371	3.12286	3.08582	3.31914	3.1144	2.85746	3.06137	3.14949	2.80095	-0.00128633	0.381759	0.141894	1.65288	0.326979	-1.33702	-0.0164568	0.554229	-1.70298	0.0591471	0.0221088	0.255424	0.0506884	-0.206254	-0.00234252	0.0857787	-0.262763	1.04185	1.01544	1.19369	1.03576	-1.15369	-1.00163	1.06126
hsa-miR-664a-5p	552	0.00791075	0.114919	0.122829	0.134779	0.0644045	0.935596	0.284805	57.7871	61.7871	62.0093	61.946	1.84164	8	57	0.0879246	3.59871	3.6983	3.77249	3.705	3.78341	3.30679	3.39537	3.4724	3.7659	-0.0684896	0.489685	0.905506	0.527256	0.966737	-1.70469	-1.20817	-0.776453	0.868613	0.099587	0.173776	0.10629	0.184701	-0.291923	-0.203336	-0.126312	0.167194	1.07147	1.12801	1.07646	1.13658	-1.22427	-1.15136	-1.0915
hsa-miR-670-3p	553	0	0.221091	0.221091	0.205374	0	1	0.0559685	92.019	94.019	94.0917	94.0984	0.422418	8	57	0.902844	2.93786	3.07555	3.08582	3.0475	3.00641	2.82458	3.05306	3.25856	2.79955	-0.510872	0.465852	0.538746	0.26687	-0.0245981	-1.31448	0.306339	1.76414	-1.492	0.137686	0.147961	0.109636	0.0685484	-0.113281	0.1152	0.320701	-0.138306	1.10014	1.108	1.07896	1.04866	-1.08169	1.08312	1.24894
hsa-miR-671-3p	554	0.109216	0.123068	0.232284	0.264951	0.470184	0.529816	0.636437	73.2268	77.2268	77.449	77.3856	4.14664	8	57	0.000591148	4.33633	4.0951	4.24121	4.57804	4.62935	3.97016	3.95582	3.87266	3.86726	0.563748	-0.262667	0.237894	1.39175	1.56755	-0.690668	-0.739794	-1.02466	-1.04315	-0.241239	-0.09512	0.241704	0.293019	-0.366177	-0.380517	-0.463673	-0.469071	-1.18201	-1.06815	1.18239	1.2252	-1.28893	-1.30181	-1.37905
hsa-miR-671-5p	555	0.133503	0.110169	0.243672	0.333959	0.54788	0.45212	0.74287	68.8576	72.8576	73.0798	73.0165	8.74356	8	57	1.05481e-07	5.55309	5.42288	5.34308	5.44952	5.44254	6.19679	6.04047	6.26969	6.76953	-0.55369	-0.812234	-0.970674	-0.759344	-0.773194	0.724395	0.414009	0.869148	1.86158	-0.130213	-0.210011	-0.103576	-0.110552	0.643698	0.487374	0.716601	1.21643	-1.09446	-1.1567	-1.07443	-1.07964	1.56233	1.40189	1.64331
hsa-miR-6734-3p	556	0	0.217506	0.217506	0.199342	0	1	0.0431716	91.0871	93.0871	93.1598	93.1666	0.321476	8	57	0.954598	2.93786	3.07555	3.08582	3.0475	3.00641	2.82458	3.05306	3.1372	2.79955	-0.495337	0.669853	0.756813	0.432476	0.0847671	-1.454	0.479561	1.19165	-1.66578	0.137686	0.147961	0.109636	0.0685484	-0.113281	0.1152	0.199344	-0.138306	1.10014	1.108	1.07896	1.04866	-1.08169	1.08312	1.14818
hsa-miR-6734-5p	557	0	0.143305	0.143305	0.141341	0	1	0.110895	67.3038	69.3038	69.3765	69.3832	0.888675	8	57	0.53189	2.99546	3.09273	3.13314	3.20895	3.21617	2.82458	3.05306	3.1372	2.79955	-0.365878	0.272563	0.537722	1.03528	1.08267	-1.48736	0.0121798	0.564425	-1.6516	0.0972776	0.137679	0.21349	0.220712	-0.170877	0.0576037	0.141748	-0.195902	1.06975	1.10013	1.15949	1.16531	-1.12574	1.04074	1.10324
hsa-miR-6763-3p	558	0	0.180679	0.180679	0.179909	0	1	0.119322	80.5136	82.5136	82.5863	82.593	0.965355	8	57	0.472009	2.98307	3.07555	3.08582	3.08038	3.44241	2.96346	3.05306	3.1372	2.79955	-0.500089	0.0384462	0.0982834	0.0665692	2.17477	-0.614266	-0.0924943	0.397495	-1.56871	0.0924808	0.102756	0.0973102	0.459344	-0.0196073	0.0699948	0.154139	-0.183511	1.0662	1.07382	1.06978	1.37492	-1.01368	1.04971	1.11276
hsa-miR-676-3p	559	0	0.54173	0.54173	0.745749	0	1	0.362982	143.102	145.102	145.175	145.181	4.05992	8	57	0.000710396	2.93786	3.07555	3.08582	3.0475	3.13848	4.19137	4.27721	4.04563	3.56509	-1.00195	-0.749785	-0.730966	-0.801156	-0.634523	1.29376	1.45098	1.02686	0.146777	0.137686	0.147961	0.109636	0.200621	1.25351	1.33935	1.10777	0.627229	1.10014	1.108	1.07896	1.14919	2.38421	2.53038	2.15512
hsa-miR-6783-5p	560	0	0.217506	0.217506	0.199342	0	1	0.0431716	91.0871	93.0871	93.1598	93.1666	0.321476	8	57	0.954598	2.93786	3.07555	3.08582	3.0475	3.00641	2.82458	3.05306	3.1372	2.79955	-0.495337	0.669853	0.756813	0.432476	0.0847671	-1.454	0.479561	1.19165	-1.66578	0.137686	0.147961	0.109636	0.0685484	-0.113281	0.1152	0.199344	-0.138306	1.10014	1.108	1.07896	1.04866	-1.08169	1.08312	1.14818
hsa-miR-6790-3p	561	0	0.217506	0.217506	0.199342	0	1	0.0431716	91.0871	93.0871	93.1598	93.1666	0.321476	8	57	0.954598	2.93786	3.07555	3.08582	3.0475	3.00641	2.82458	3.05306	3.1372	2.79955	-0.495337	0.669853	0.756813	0.432476	0.0847671	-1.454	0.479561	1.19165	-1.66578	0.137686	0.147961	0.109636	0.0685484	-0.113281	0.1152	0.199344	-0.138306	1.10014	1.108	1.07896	1.04866	-1.08169	1.08312	1.14818
hsa-miR-6793-5p	562	0	0.217506	0.217506	0.199342	0	1	0.0431716	91.0871	93.0871	93.1598	93.1666	0.321476	8	57	0.954598	2.93786	3.07555	3.08582	3.0475	3.00641	2.82458	3.05306	3.1372	2.79955	-0.495337	0.669853	0.756813	0.432476	0.0847671	-1.454	0.479561	1.19165	-1.66578	0.137686	0.147961	0.109636	0.0685484	-0.113281	0.1152	0.199344	-0.138306	1.10014	1.108	1.07896	1.04866	-1.08169	1.08312	1.14818
hsa-miR-6827-5p	563	0	0.217506	0.217506	0.199342	0	1	0.0431716	91.0871	93.0871	93.1598	93.1666	0.321476	8	57	0.954598	2.93786	3.07555	3.08582	3.0475	3.00641	2.82458	3.05306	3.1372	2.79955	-0.495337	0.669853	0.756813	0.432476	0.0847671	-1.454	0.479561	1.19165	-1.66578	0.137686	0.147961	0.109636	0.0685484	-0.113281	0.1152	0.199344	-0.138306	1.10014	1.108	1.07896	1.04866	-1.08169	1.08312	1.14818
hsa-miR-6832-3p	564	0	0.207197	0.207197	0.190464	0	1	0.0460357	88.3194	90.3194	90.3921	90.3988	0.343833	8	57	0.944842	2.93786	3.07555	3.08582	3.0475	3.03929	2.82458	3.05306	3.1372	2.79955	-0.522479	0.634355	0.720691	0.39868	0.329717	-1.47427	0.445428	1.15241	-1.68453	0.137686	0.147961	0.109636	0.101428	-0.113281	0.1152	0.199344	-0.138306	1.10014	1.108	1.07896	1.07283	-1.08169	1.08312	1.14818
hsa-miR-6833-3p	565	0	0.217506	0.217506	0.199342	0	1	0.0431716	91.0871	93.0871	93.1598	93.1666	0.321476	8	57	0.954598	2.93786	3.07555	3.08582	3.0475	3.00641	2.82458	3.05306	3.1372	2.79955	-0.495337	0.669853	0.756813	0.432476	0.0847671	-1.454	0.479561	1.19165	-1.66578	0.137686	0.147961	0.109636	0.0685484	-0.113281	0.1152	0.199344	-0.138306	1.10014	1.108	1.07896	1.04866	-1.08169	1.08312	1.14818
hsa-miR-6847-5p	566	0	0.101848	0.101848	0.100337	0	1	0.109875	47.8385	49.8385	49.9112	49.9179	0.879494	8	57	0.539293	2.98307	3.12286	3.08582	3.13226	3.29041	2.97478	3.05306	3.1372	2.79955	-0.593945	0.427718	0.15703	0.496381	1.65224	-0.654472	-0.0824015	0.532551	-1.9351	0.139795	0.102756	0.14919	0.307347	-0.00828196	0.0699948	0.154139	-0.183511	1.10175	1.07382	1.10895	1.23743	-1.00576	1.04971	1.11276
hsa-miR-6861-5p	567	0	0.217506	0.217506	0.199342	0	1	0.0431716	91.0871	93.0871	93.1598	93.1666	0.321476	8	57	0.954598	2.93786	3.07555	3.08582	3.0475	3.00641	2.82458	3.05306	3.1372	2.79955	-0.495337	0.669853	0.756813	0.432476	0.0847671	-1.454	0.479561	1.19165	-1.66578	0.137686	0.147961	0.109636	0.0685484	-0.113281	0.1152	0.199344	-0.138306	1.10014	1.108	1.07896	1.04866	-1.08169	1.08312	1.14818
hsa-miR-6865-5p	568	0.0629231	0.320348	0.383272	0.724018	0.164174	0.835826	0.641005	119.749	123.749	123.971	123.908	9.53885	8	57	2.91439e-08	4.68443	3.94713	4.20842	5.51384	4.53731	4.10571	3.49397	3.23149	3.43673	0.774191	-0.253093	0.110965	1.92981	0.569201	-0.0321419	-0.884487	-1.2502	-0.964243	-0.7373	-0.476009	0.829406	-0.147125	-0.578719	-1.19046	-1.45294	-1.2477	-1.66705	-1.39089	1.77695	-1.10736	-1.49352	-2.28226	-2.73765
hsa-miR-6866-5p	569	0	0.213492	0.213492	0.195878	0	1	0.0442191	90.0255	92.0255	92.0983	92.105	0.329637	8	57	0.951155	2.93786	3.07555	3.08582	3.0475	3.0236	2.82458	3.05306	3.1372	2.79955	-0.510115	0.651923	0.738647	0.415188	0.213482	-1.46619	0.462146	1.17231	-1.67739	0.137686	0.147961	0.109636	0.0857364	-0.113281	0.1152	0.199344	-0.138306	1.10014	1.108	1.07896	1.06123	-1.08169	1.08312	1.14818
hsa-miR-6872-3p	570	0	0.190155	0.190155	0.178798	0	1	0.0673713	83.4272	85.4272	85.5	85.5067	0.514697	8	57	0.840457	2.93786	3.07555	3.08582	3.0475	3.19842	2.84177	3.05306	3.1372	2.79955	-0.613917	0.419733	0.496876	0.209154	1.34215	-1.33532	0.250924	0.882622	-1.65223	0.137686	0.147961	0.109636	0.260555	-0.0960935	0.1152	0.199344	-0.138306	1.10014	1.108	1.07896	1.19794	-1.06888	1.08312	1.14818
hsa-miR-7-1-3p	571	0	0.135183	0.135183	0.14148	0	1	0.162104	63.9783	65.9783	66.051	66.0577	1.37844	8	57	0.225627	2.96456	3.09273	3.26414	3.31104	3.26792	3.17939	3.43499	3.17158	3.47763	-1.71588	-0.918698	0.147377	0.439095	0.170885	-0.379719	1.21004	-0.428302	1.4752	0.128171	0.299575	0.346478	0.303355	0.214828	0.470431	0.207017	0.513063	1.09291	1.23078	1.27145	1.23401	1.16057	1.38552	1.1543
hsa-miR-718	572	0	0.182732	0.182732	0.174203	0	1	0.0801453	81.1573	83.1573	83.23	83.2367	0.620789	8	57	0.756812	2.93786	3.07555	3.08582	3.08187	3.21617	2.82458	3.05306	3.1372	2.79955	-0.609556	0.370237	0.44336	0.415254	1.37092	-1.41568	0.210223	0.809007	-1.59376	0.137686	0.147961	0.144012	0.278307	-0.113281	0.1152	0.199344	-0.138306	1.10014	1.108	1.10497	1.21277	-1.08169	1.08312	1.14818
hsa-miR-744-5p	573	0.162558	0.111314	0.273872	0.323999	0.593553	0.406447	0.73276	70.6393	74.6393	74.8615	74.7981	7.68648	8	57	6.35977e-07	8.18189	8.21283	8.13869	8.3595	8.53325	8.0197	7.68496	7.16102	7.44847	0.46956	0.538512	0.373302	0.865304	1.25244	0.108182	-0.637662	-1.80506	-1.16459	0.0309464	-0.0432011	0.177613	0.351363	-0.162189	-0.49693	-1.02086	-0.733417	1.02168	-1.0304	1.13101	1.27577	-1.11898	-1.41121	-2.02913
hsa-miR-7-5p	574	0.0719943	0.0652349	0.137229	0.146121	0.524628	0.475372	0.651619	38.3987	42.3987	42.6209	42.5576	2.77128	8	57	0.0116495	12.0333	12.0611	11.9714	11.819	11.6245	12.0034	11.8633	12.1625	12.1062	0.436874	0.604231	0.0654806	-0.850007	-2.01817	0.257543	-0.58394	1.21293	0.875061	0.0278662	-0.0618396	-0.214275	-0.408782	-0.0298597	-0.169973	0.129218	0.0729612	1.0195	-1.0438	-1.16012	-1.32756	-1.02091	-1.12504	1.0937
hsa-miR-7641	575	0	0.217506	0.217506	0.199342	0	1	0.0431716	91.0871	93.0871	93.1598	93.1666	0.321476	8	57	0.954598	2.93786	3.07555	3.08582	3.0475	3.00641	2.82458	3.05306	3.1372	2.79955	-0.495337	0.669853	0.756813	0.432476	0.0847671	-1.454	0.479561	1.19165	-1.66578	0.137686	0.147961	0.109636	0.0685484	-0.113281	0.1152	0.199344	-0.138306	1.10014	1.108	1.07896	1.04866	-1.08169	1.08312	1.14818
hsa-miR-769-3p	576	0	0.217506	0.217506	0.199342	0	1	0.0431716	91.0871	93.0871	93.1598	93.1666	0.321476	8	57	0.954598	2.93786	3.07555	3.08582	3.0475	3.00641	2.82458	3.05306	3.1372	2.79955	-0.495337	0.669853	0.756813	0.432476	0.0847671	-1.454	0.479561	1.19165	-1.66578	0.137686	0.147961	0.109636	0.0685484	-0.113281	0.1152	0.199344	-0.138306	1.10014	1.108	1.07896	1.04866	-1.08169	1.08312	1.14818
hsa-miR-769-5p	577	0.0489497	0.123246	0.172196	0.167209	0.284268	0.715732	0.413824	68.6859	72.6859	72.9082	72.8448	1.26305	8	57	0.280925	3.94347	3.92212	4.02464	3.72559	3.89588	3.84588	4.03563	3.78757	3.05164	0.466736	0.395503	0.737608	-0.260335	0.307933	0.141098	0.7743	-0.0535084	-2.50933	-0.021346	0.0811709	-0.217878	-0.047588	-0.0975826	0.0921663	-0.155899	-0.891825	-1.01491	1.05788	-1.16302	-1.03354	-1.06998	1.06597	-1.11412
hsa-miR-7705	578	0	0.217506	0.217506	0.199342	0	1	0.0431716	91.0871	93.0871	93.1598	93.1666	0.321476	8	57	0.954598	2.93786	3.07555	3.08582	3.0475	3.00641	2.82458	3.05306	3.1372	2.79955	-0.495337	0.669853	0.756813	0.432476	0.0847671	-1.454	0.479561	1.19165	-1.66578	0.137686	0.147961	0.109636	0.0685484	-0.113281	0.1152	0.199344	-0.138306	1.10014	1.108	1.07896	1.04866	-1.08169	1.08312	1.14818
hsa-miR-7976	579	0.0156882	0.0660777	0.081766	0.0833588	0.191867	0.808133	0.360584	30.6075	34.6075	34.8297	34.7663	1.47684	8	57	0.186052	3.37498	3.45399	3.50912	3.51874	3.48641	3.27008	3.41814	3.48863	2.7969	0.0281481	0.374261	0.615746	0.657877	0.516277	-0.431363	0.217198	0.525998	-2.50414	0.0790118	0.134139	0.143757	0.111432	-0.104899	0.0431569	0.113651	-0.578079	1.05629	1.09744	1.10478	1.0803	-1.07542	1.03037	1.08196
hsa-miR-7977	580	0.0508475	0.215488	0.266335	0.721806	0.190915	0.809085	0.759141	97.9575	101.958	102.18	102.116	18.2141	8	57	3.61256e-13	4.27687	3.89039	3.70588	5.53246	5.56903	5.08797	4.56344	4.00789	3.19279	-0.178705	-0.644343	-0.866641	1.33406	1.37812	0.798532	0.166566	-0.502768	-1.48482	-0.386479	-0.570985	1.25559	1.29216	0.811105	0.286575	-0.268972	-1.08408	-1.3072	-1.48554	2.38765	2.44895	1.75456	1.21974	-1.20495
hsa-miR-802	581	0	0.250622	0.250622	0.239233	0	1	0.08133	99.1651	101.165	101.238	101.245	0.630778	8	57	0.748522	2.93786	3.07555	3.08582	3.0475	3.03929	2.93058	3.05306	3.52122	2.79955	-0.589179	0.10636	0.158269	-0.0353376	-0.0768015	-0.625964	-0.00723096	2.35773	-1.28785	0.137686	0.147961	0.109636	0.101428	-0.00728179	0.1152	0.583357	-0.138306	1.10014	1.108	1.07896	1.07283	-1.00506	1.08312	1.49833
hsa-miR-8485	582	0.00261988	0.192878	0.195498	0.183064	0.013401	0.986599	0.0871818	84.96	88.96	89.1822	89.1188	0.49696	8	57	0.853361	2.94811	3.10843	3.08582	3.16325	3.00641	2.82458	3.05665	3.14631	2.79656	-0.500832	0.697314	0.528381	1.10703	-0.0651278	-1.42407	0.310388	0.98044	-1.63352	0.160315	0.137711	0.215135	0.0582982	-0.123532	0.108543	0.198197	-0.151556	1.11753	1.10016	1.16081	1.04124	-1.0894	1.07814	1.14726
hsa-miR-873-3p	583	0	0.177536	0.177536	0.161451	0	1	0.0357088	79.5133	81.5133	81.586	81.5927	0.263847	8	57	0.974995	2.93786	3.07555	3.08582	3.10818	3.05372	2.95838	3.07598	3.1372	2.79955	-0.819914	0.463749	0.55955	0.76795	0.260288	-0.628629	0.46777	1.0386	-2.10936	0.137686	0.147961	0.170314	0.115862	0.0205173	0.138117	0.199344	-0.138306	1.10014	1.108	1.1253	1.08362	1.01432	1.10047	1.14818
hsa-miR-873-5p	584	0.587665	0.162642	0.750307	0.711704	0.783233	0.216767	0.823376	98.2524	102.252	102.475	102.411	0.266477	8	57	0.974214	3.29969	3.41031	3.28394	3.35493	3.44047	3.2537	3.38664	3.23803	3.0617	-0.0311875	0.932742	-0.168396	0.450157	1.1956	-0.431936	0.726482	-0.568448	-2.10501	0.110617	-0.0157456	0.0552375	0.140782	-0.0459886	0.0869476	-0.0616543	-0.237985	1.07969	-1.01097	1.03903	1.1025	-1.03239	1.06212	-1.04366
hsa-miR-874-3p	585	0	0.217506	0.217506	0.199342	0	1	0.0431716	91.0871	93.0871	93.1598	93.1666	0.321476	8	57	0.954598	2.93786	3.07555	3.08582	3.0475	3.00641	2.82458	3.05306	3.1372	2.79955	-0.495337	0.669853	0.756813	0.432476	0.0847671	-1.454	0.479561	1.19165	-1.66578	0.137686	0.147961	0.109636	0.0685484	-0.113281	0.1152	0.199344	-0.138306	1.10014	1.108	1.07896	1.04866	-1.08169	1.08312	1.14818
hsa-miR-877-3p	586	0	0.217506	0.217506	0.199342	0	1	0.0431716	91.0871	93.0871	93.1598	93.1666	0.321476	8	57	0.954598	2.93786	3.07555	3.08582	3.0475	3.00641	2.82458	3.05306	3.1372	2.79955	-0.495337	0.669853	0.756813	0.432476	0.0847671	-1.454	0.479561	1.19165	-1.66578	0.137686	0.147961	0.109636	0.0685484	-0.113281	0.1152	0.199344	-0.138306	1.10014	1.108	1.07896	1.04866	-1.08169	1.08312	1.14818
hsa-miR-877-5p	587	0.00823736	0.18436	0.192598	0.188715	0.0427698	0.95723	0.170947	83.8003	87.8003	88.0225	87.9591	0.874347	8	57	0.543462	2.94032	3.07555	3.17058	3.29293	3.07953	2.82458	3.06028	3.15072	2.79953	-0.637721	0.195803	0.781589	1.53574	0.220355	-1.35114	0.101713	0.659178	-1.50552	0.135226	0.230261	0.352611	0.139209	-0.115741	0.119962	0.210402	-0.140788	1.09827	1.17305	1.27687	1.1013	-1.08353	1.08671	1.15701
hsa-miR-889-3p	588	0.0196562	0.168353	0.18801	0.186348	0.104549	0.895451	0.25456	81.0928	85.0928	85.315	85.2516	1.09206	8	57	0.382109	2.98476	3.22418	3.20901	3.06468	3.30379	2.82458	3.09374	3.19393	2.81936	-0.545025	0.828225	0.741234	-0.0865982	1.2849	-1.46381	0.080066	0.654748	-1.49373	0.239414	0.224248	0.0799226	0.319031	-0.160182	0.108979	0.20917	-0.165399	1.18051	1.16817	1.05696	1.24749	-1.11743	1.07846	1.15602
hsa-miR-92a-3p	589	0.0598018	0.0480368	0.107839	0.202026	0.554549	0.445451	0.814725	21.716	25.716	25.9382	25.8748	22.0359	8	57	7.60641e-15	14.4581	14.1239	14.1228	14.7764	14.6422	14.0846	13.8542	13.6789	12.7981	0.673129	0.10822	0.106389	1.21123	0.98429	0.0417412	-0.347688	-0.64415	-2.13317	-0.334166	-0.335248	0.318309	0.184063	-0.37349	-0.603852	-0.779221	-1.66003	-1.26065	-1.26159	1.24687	1.13608	-1.29548	-1.51977	-1.7162
hsa-miR-92b-3p	590	0.0270799	0.0611419	0.0882218	0.161875	0.306952	0.693048	0.700414	29.3156	33.3156	33.5378	33.4745	12.462	8	57	3.92558e-10	5.65737	5.42103	5.48895	6.06577	5.98489	5.37858	5.34436	5.22423	4.31393	0.445508	-0.0196527	0.114031	1.24929	1.09011	-0.103195	-0.170538	-0.406975	-2.19857	-0.236346	-0.168422	0.408397	0.327516	-0.278793	-0.31301	-0.433142	-1.34344	-1.17801	-1.12383	1.32721	1.25485	-1.21318	-1.2423	-1.35017
hsa-miR-92b-5p	591	0	0.189626	0.189626	0.176756	0	1	0.0592238	83.2684	85.2684	85.3411	85.3479	0.448533	8	57	0.886463	2.93786	3.07555	3.08582	3.0475	3.13141	2.82458	3.05306	3.1372	2.79955	-0.572317	0.515766	0.596971	0.294097	0.957232	-1.46754	0.338067	1.00303	-1.6653	0.137686	0.147961	0.109636	0.193548	-0.113281	0.1152	0.199344	-0.138306	1.10014	1.108	1.07896	1.14357	-1.08169	1.08312	1.14818
hsa-miR-933	592	0	0.217506	0.217506	0.199342	0	1	0.0431716	91.0871	93.0871	93.1598	93.1666	0.321476	8	57	0.954598	2.93786	3.07555	3.08582	3.0475	3.00641	2.82458	3.05306	3.1372	2.79955	-0.495337	0.669853	0.756813	0.432476	0.0847671	-1.454	0.479561	1.19165	-1.66578	0.137686	0.147961	0.109636	0.0685484	-0.113281	0.1152	0.199344	-0.138306	1.10014	1.108	1.07896	1.04866	-1.08169	1.08312	1.14818
hsa-miR-93-3p	593	0.0645481	0.0503376	0.114886	0.13355	0.561847	0.438153	0.706403	24.5709	28.5709	28.7931	28.7297	5.63003	8	57	2.87108e-05	7.07962	7.04267	6.86548	7.35696	7.42259	7.18187	7.22409	7.09533	6.43439	0.00513027	-0.120693	-0.72421	0.949724	1.17328	0.353381	0.497203	0.0586397	-2.19245	-0.0369425	-0.214139	0.277339	0.342975	0.102249	0.144475	0.0157107	-0.645224	-1.02594	-1.16001	1.21196	1.26837	1.07345	1.10533	1.01095
hsa-miR-93-5p	594	0.00446373	0.0221289	0.0265927	0.0318577	0.167856	0.832144	0.436878	-32.4707	-28.4707	-28.2485	-28.3118	3.39929	8	57	0.00294243	15.0916	14.9501	14.9762	14.8868	14.8437	14.889	14.8781	14.9019	14.6109	1.55383	0.452006	0.655426	-0.0405559	-0.37642	-0.0237973	-0.108596	0.0767505	-2.18864	-0.141522	-0.115394	-0.204789	-0.247929	-0.202636	-0.213528	-0.189722	-0.480697	-1.10307	-1.08327	-1.15252	-1.1875	-1.1508	-1.15952	-1.14054
hsa-miR-939-5p	595	0	0.211852	0.211852	0.194439	0	1	0.0445463	89.5858	91.5858	91.6585	91.6652	0.33219	8	57	0.95005	2.93786	3.07555	3.08582	3.0475	3.0236	2.82458	3.05306	3.1372	2.79955	-0.510115	0.651923	0.738647	0.415188	0.213482	-1.46619	0.462146	1.17231	-1.67739	0.137686	0.147961	0.109636	0.0857364	-0.113281	0.1152	0.199344	-0.138306	1.10014	1.108	1.07896	1.06123	-1.08169	1.08312	1.14818
hsa-miR-9-3p	596	0.00397404	0.220143	0.224117	0.218374	0.017732	0.982268	0.129666	92.7183	96.7183	96.9405	96.8772	0.823997	8	57	0.584915	2.93927	3.07555	3.08582	3.13226	3.00641	2.8977	3.10158	3.53115	2.80225	-0.602925	0.0581831	0.108031	0.333283	-0.277205	-0.804562	0.184461	2.26834	-1.2676	0.136281	0.146557	0.19299	0.0671439	-0.0415656	0.162312	0.591883	-0.137017	1.09907	1.10692	1.14313	1.04764	-1.02923	1.11908	1.50721
hsa-miR-942-3p	597	0.0576424	0.144069	0.201711	0.177092	0.285767	0.714233	0.353147	77.623	81.623	81.8453	81.7819	0.110713	8	57	0.998682	3.49376	3.45047	3.48327	3.48391	3.57036	3.50092	3.4462	3.5795	3.65511	-0.352851	-0.978491	-0.504412	-0.495225	0.754425	-0.249282	-1.04032	0.886552	1.9796	-0.0432811	-0.0104848	-0.00984926	0.0766001	0.00716479	-0.0475584	0.0857405	0.161357	-1.03045	-1.00729	-1.00685	1.05453	1.00498	-1.03351	1.06123
hsa-miR-942-5p	598	0.297658	0.0826848	0.380343	0.317837	0.782605	0.217395	0.79893	59.6661	63.6661	63.8883	63.825	2.41967	8	57	0.0252258	7.9038	7.7704	7.78532	7.64293	7.76158	7.59473	7.84728	8.21989	8.32185	0.129351	-0.4128	-0.352151	-0.930813	-0.44865	-1.12671	-0.100372	1.4139	1.82825	-0.133407	-0.118483	-0.260874	-0.142229	-0.309079	-0.0565281	0.316088	0.418047	-1.09688	-1.08559	-1.1982	-1.10361	-1.23892	-1.03996	1.24495
hsa-miR-95-3p	599	0.00362124	0.215825	0.219446	0.201159	0.0165018	0.983498	0.0728062	91.5266	95.5266	95.7488	95.6855	0.340681	8	57	0.946279	2.98445	3.07555	3.08582	3.09481	3.00641	2.82458	3.1015	3.15186	2.79626	-0.230936	0.493937	0.575699	0.64722	-0.056181	-1.50298	0.700409	1.10116	-1.72833	0.0910998	0.101375	0.110364	0.0219627	-0.159867	0.117049	0.167414	-0.188188	1.06518	1.0728	1.0795	1.01534	-1.11718	1.08451	1.12304
hsa-miR-9-5p	600	0.328393	0.195037	0.52343	0.532416	0.627386	0.372614	0.715443	103.528	107.528	107.751	107.687	1.37442	8	57	0.227389	3.69989	3.65849	3.85183	3.51918	3.81344	3.36683	3.65753	4.07415	3.26335	0.175882	0.00968749	0.785818	-0.549549	0.631711	-1.16113	0.00583677	1.67829	-1.57655	-0.0414004	0.15194	-0.180711	0.11355	-0.33306	-0.0423596	0.374261	-0.436543	-1.02911	1.11106	-1.13344	1.08189	-1.25968	-1.0298	1.29618
hsa-miR-96-5p	601	0.115836	0.150688	0.266524	0.239811	0.434617	0.565383	0.507056	83.8964	87.8964	88.1187	88.0553	0.143503	8	57	0.996686	3.7586	3.79946	3.90256	3.78176	3.76841	3.80503	3.78497	3.9022	3.91681	-1.03212	-0.391358	1.22531	-0.668917	-0.878342	-0.304121	-0.618692	1.21956	1.44867	0.0408632	0.143963	0.0231624	0.00980664	0.0464266	0.0263654	0.143597	0.158208	1.02873	1.10494	1.01618	1.00682	1.0327	1.01844	1.10466
hsa-miR-98-3p	602	0	0.217506	0.217506	0.199342	0	1	0.0431716	91.0871	93.0871	93.1598	93.1666	0.321476	8	57	0.954598	2.93786	3.07555	3.08582	3.0475	3.00641	2.82458	3.05306	3.1372	2.79955	-0.495337	0.669853	0.756813	0.432476	0.0847671	-1.454	0.479561	1.19165	-1.66578	0.137686	0.147961	0.109636	0.0685484	-0.113281	0.1152	0.199344	-0.138306	1.10014	1.108	1.07896	1.04866	-1.08169	1.08312	1.14818
hsa-miR-98-5p	603	0.0247956	0.020902	0.0456976	0.0579363	0.542602	0.457398	0.718731	-26.0207	-22.0207	-21.7985	-21.8619	6.90113	8	57	2.58884e-06	8.74523	8.71086	8.77959	8.90467	8.78931	8.6526	8.41877	8.46332	8.58548	0.459722	0.243345	0.676005	1.46339	0.737199	-0.123427	-1.59535	-1.31494	-0.545948	-0.0343726	0.0343575	0.159437	0.0440785	-0.0926362	-0.326459	-0.281914	-0.159756	-1.02411	1.0241	1.11685	1.03102	-1.06632	-1.25393	-1.21581
hsa-miR-99a-5p	604	0.0488492	0.31379	0.362639	0.639521	0.134705	0.865295	0.598916	117.625	121.625	121.847	121.784	8.68244	8	57	1.16706e-07	4.11187	3.90842	4.22675	3.70341	3.94713	4.43511	5.29378	5.91634	4.93463	-0.523275	-0.79935	-0.367384	-1.07754	-0.746818	-0.0846525	1.08052	1.92532	0.593178	-0.203451	0.114882	-0.408464	-0.164739	0.323239	1.18191	1.80447	0.822761	-1.15145	1.08289	-1.32727	-1.12096	1.25114	2.26876	3.49301
hsa-miR-99b-5p	605	0	0.273103	0.273103	0.319023	0	1	0.249301	104.062	106.062	106.134	106.141	2.36616	8	57	0.0283615	3.02363	3.15849	3.17613	3.26338	3.37035	2.98953	3.6052	4.09273	3.06259	-0.798039	-0.41508	-0.364998	-0.117244	0.186492	-0.894856	0.853373	2.23776	-0.687405	0.134865	0.152503	0.239753	0.346719	-0.034096	0.581573	1.06911	0.0389614	1.09799	1.1115	1.18079	1.27167	-1.02392	1.49648	2.09813
piRNA	606	0	0.217506	0.217506	0.199342	0	1	0.0431716	91.0871	93.0871	93.1598	93.1666	0.321476	8	57	0.954598	2.93786	3.07555	3.08582	3.0475	3.00641	2.82458	3.05306	3.1372	2.79955	-0.495337	0.669853	0.756813	0.432476	0.0847671	-1.454	0.479561	1.19165	-1.66578	0.137686	0.147961	0.109636	0.0685484	-0.113281	0.1152	0.199344	-0.138306	1.10014	1.108	1.07896	1.04866	-1.08169	1.08312	1.14818
[truncated: 43 more columns]
