# Supplementary material for: Transcriptomic Analysis Reveals Host miRNAs Correlated with Immune Gene Dysregulation during Fatal Disease Progression in the Ebola Virus Cynomolgus Macaque Disease Model
Source: Microorganisms. 2021 Mar 23;9(3):665. doi: 10.3390/microorganisms9030665 (PMC8005181; doi:10.3390/microorganisms9030665)
Supplement: Supplementary file 1 [file microorganisms-09-00665-s001.zip › Supplemental Table S9 - Binned miRNA expression analysis.xlsx]

## Sheet: zumbrun_mirna_data_thres__amr
miRNA	_Row	Variance_ID	Variance_Residual	SumVariance	SampleVariance	PropVar_ID	PropVar_Residual	RSquare	N2RLL	AIC	AICC	BIC	F_T3_BIN	NDF_T3_BIN	DDF_T3_BIN	PrF_T3_BIN	Lsmean BIN Early	Lsmean BIN Incubation	Lsmean BIN Late	Lsmean BIN Mid	Lsmean BIN Not Infected	Std Lsmean BIN Early	Std Lsmean BIN Incubation	Std Lsmean BIN Late	Std Lsmean BIN Mid	Std Lsmean BIN Not Infected	Diff of BIN = (Early)-(Not Infected)	Diff of BIN = (Incubation)-(Not Infected)	Diff of BIN = (Late)-(Not Infected)	Diff of BIN = (Mid)-(Not Infected)	Exp2 Diff of BIN = (Early)-(Not Infected)	Exp2 Diff of BIN = (Incubation)-(Not Infected)	Exp2 Diff of BIN = (Late)-(Not Infected)	Exp2 Diff of BIN = (Mid)-(Not Infected)	t-Statistic for Diff of BIN = (Early)-(Not Infected)	t-Statistic for Diff of BIN = (Incubation)-(Not Infected)	t-Statistic for Diff of BIN = (Late)-(Not Infected)	t-Statistic for Diff of BIN = (Mid)-(Not Infected)	p-Value for Diff of BIN = (Early)-(Not Infected)	p-Value for Diff of BIN = (Incubation)-(Not Infected)	p-Value for Diff of BIN = (Late)-(Not Infected)	p-Value for Diff of BIN = (Mid)-(Not Infected)	-log10(p-value) for Diff of BIN = (Early)-(Not Infected)	-log10(p-value) for Diff of BIN = (Incubation)-(Not Infected)	-log10(p-value) for Diff of BIN = (Late)-(Not Infected)	-log10(p-value) for Diff of BIN = (Mid)-(Not Infected)	Adjusted p-Value for Diff of BIN = (Early)-(Not Infected)	Adjusted p-Value for Diff of BIN = (Incubation)-(Not Infected)	Adjusted p-Value for Diff of BIN = (Late)-(Not Infected)
hsa-piR-000765-gb-DQ570956-Homo	1	0.123424	0.295303	0.418727	0.875256	0.29476	0.70524	0.711243	121.465	125.465	125.672	125.624	30.0293	4	61	8.15979e-14	4.9896	4.10066	5.86546	5.76776	3.88552	0.0739863	-0.896087	1.02979	0.923175	-1.13086	1.10407	0.215136	1.97993	1.88224	2.14961	1.16081	3.94474	3.68646	5.62971	1.02544	7.29404	8.336	4.84914e-07	0.309205	7.23076e-10	1.16421e-11	6.31433	0.509753	9.14082	10.934	1.30604e-05	0.772746	5.2141e-08
hsa-piR-000794-gb-DQ570992-Homo	2	0.00259436	0.204701	0.207295	0.199342	0.0125153	0.987485	0.0464596	89.5494	93.5494	93.7563	93.7083	0.419155	4	61	0.794197	2.9747	3.08994	3.12503	2.91538	2.95157	-0.401869	0.862556	1.2476	-1.05272	-0.655571	0.0231227	0.138364	0.173458	-0.0361966	1.01616	1.10066	1.12776	-1.02541	0.143218	0.815652	0.775719	-0.194948	0.88659	0.417873	0.440912	0.846082	0.0522772	0.378956	0.355648	0.0725877	0.945978	0.772746	0.772746
hsa-piR-000805-gb-DQ571003-Homo	3	0.0308465	0.167254	0.1981	0.300877	0.155711	0.844289	0.513829	82.8676	86.8676	87.0745	87.0265	12.0647	4	61	2.75523e-07	4.52674	4.77325	5.48796	5.37391	4.63671	-0.982283	-0.42302	1.19841	0.939679	-0.732791	-0.109973	0.136543	0.851253	0.737206	-1.07921	1.09927	1.80407	1.66694	-0.747184	0.871169	4.17874	4.35191	0.457823	0.387078	9.50117e-05	5.23153e-05	0.339302	0.412202	4.02222	4.28137	0.777998	0.772746	0.00117504
hsa-piR-001042-gb-DQ571335-Homo	4	0.00652451	0.151068	0.157592	0.152579	0.0414012	0.958599	0.0980915	72.4124	76.4124	76.6193	76.5713	0.584092	4	61	0.675331	3.07959	3.11485	3.31073	3.03095	3.05603	-0.347232	-0.0319952	1.71917	-0.782076	-0.557867	0.0235604	0.0588209	0.254696	-0.0250786	1.01646	1.04161	1.19308	-1.01754	0.169385	0.400704	1.32257	-0.156746	0.866054	0.690038	0.190916	0.875963	0.0624548	0.161127	0.719157	0.0575143	0.945978	0.945978	0.642751
hsa-piR-001152-gb-DQ571500-Homo	5	0.0737267	0.262989	0.336716	0.412591	0.218958	0.781042	0.44909	112.358	116.358	116.564	116.516	7.41065	4	61	6.22732e-05	4.19417	3.99772	5.23863	4.05783	3.97836	-0.185327	-0.552421	1.76645	-0.440099	-0.588602	0.215807	0.0193619	1.26027	0.079469	1.16135	1.01351	2.39541	1.05663	1.1675	0.0981157	4.92606	0.373472	0.247552	0.922162	6.73524e-06	0.710092	0.606333	0.0351927	5.17165	0.148685	0.755189	0.962738	0.000137195
hsa-piR-001184-gb-DQ571550-Homo	6	0.00259436	0.204701	0.207295	0.199342	0.0125153	0.987485	0.0464596	89.5494	93.5494	93.7563	93.7083	0.419155	4	61	0.794197	2.9747	3.08994	3.12503	2.91538	2.95157	-0.401869	0.862556	1.2476	-1.05272	-0.655571	0.0231227	0.138364	0.173458	-0.0361966	1.01616	1.10066	1.12776	-1.02541	0.143218	0.815652	0.775719	-0.194948	0.88659	0.417873	0.440912	0.846082	0.0522772	0.378956	0.355648	0.0725877	0.945978	0.772746	0.772746
hsa-piR-001311-gb-DQ571812-Homo	7	0.00470851	0.186134	0.190842	0.183276	0.0246723	0.975328	0.0652445	84.3612	88.3612	88.5681	88.5201	0.427735	4	61	0.788034	2.97519	3.093	3.12796	2.91663	2.98596	-0.507468	0.83431	1.23245	-1.17448	-0.384809	-0.0107699	0.107043	0.142001	-0.0693358	-1.00749	1.07702	1.10343	-1.04923	-0.0698617	0.659503	0.665194	-0.391054	0.944532	0.512055	0.508434	0.69712	0.0247832	0.290683	0.293766	0.156693	0.972619	0.829694	0.826771
hsa-piR-001312-gb-DQ571813-Homo	8	0.0521409	0.0949539	0.147095	0.144745	0.354471	0.645529	0.441736	53.7634	57.7634	57.9703	57.9223	2.45686	4	61	0.0549633	3.55574	3.25512	3.59545	3.39946	3.38259	0.852909	-1.31873	1.13973	-0.276004	-0.3979	0.173155	-0.127475	0.21286	0.0168745	1.12752	-1.09238	1.15898	1.01177	1.55594	-1.06951	1.38188	0.131687	0.124895	0.289056	0.172049	0.895665	0.903453	0.539018	0.764348	0.0478543	0.48595	0.772746	0.600067
hsa-piR-002158-gb-DQ572892-Homo	9	0.0117065	0.166128	0.177834	0.173311	0.0658283	0.934172	0.137464	79.2563	83.2563	83.4632	83.4152	0.716263	4	61	0.584063	2.98014	3.10643	3.20067	2.91859	3.08182	-0.700917	0.442877	1.29642	-1.25836	0.219984	-0.101677	0.0246096	0.118849	-0.163225	-1.07302	1.0172	1.08587	-1.11979	-0.69585	0.159147	0.587575	-0.970984	0.489166	0.874079	0.558986	0.335391	0.310544	0.0584493	0.252599	0.474449	0.809999	0.945978	0.873056
hsa-piR-003672-gb-DQ574991-Homo	10	0.00240568	0.197818	0.200224	0.192549	0.0120149	0.987985	0.045641	87.4369	91.4369	91.6438	91.5958	0.417689	4	61	0.795249	2.98786	3.08969	3.12479	2.9154	2.95164	-0.289494	0.843744	1.2343	-1.09593	-0.692627	0.0362246	0.138055	0.17315	-0.0362396	1.02543	1.10042	1.12752	-1.02544	0.228253	0.827992	0.787738	-0.198559	0.820213	0.410903	0.4339	0.843268	0.0860734	0.386261	0.36261	0.0740342	0.945978	0.772746	0.772746
hsa-piR-004153-gb-DQ575660-Homo	11	0.00259436	0.204701	0.207295	0.199342	0.0125153	0.987485	0.0464596	89.5494	93.5494	93.7563	93.7083	0.419155	4	61	0.794197	2.9747	3.08994	3.12503	2.91538	2.95157	-0.401869	0.862556	1.2476	-1.05272	-0.655571	0.0231227	0.138364	0.173458	-0.0361966	1.01616	1.10066	1.12776	-1.02541	0.143218	0.815652	0.775719	-0.194948	0.88659	0.417873	0.440912	0.846082	0.0522772	0.378956	0.355648	0.0725877	0.945978	0.772746	0.772746
hsa-piR-004307-gb-DQ575881-Homo	12	0.292605	0.240317	0.532922	0.751859	0.549058	0.450942	0.731204	115.218	119.218	119.424	119.376	17.1292	4	61	1.82176e-09	5.0522	4.4777	3.3719	4.09953	4.88851	1.00095	0.148061	-1.49359	-0.41337	0.757946	0.163687	-0.410811	-1.51661	-0.788985	1.12015	-1.32943	-2.86117	-1.72786	0.923236	-2.1582	-6.17939	-3.8639	0.359522	0.0348573	5.82549e-08	0.000272874	0.444275	1.45771	7.23467	3.56404	0.772746	0.183284	2.01729e-06
hsa-piR-004308-gb-DQ575882-Homo	13	0.025597	0.178076	0.203673	0.234001	0.125677	0.874323	0.32944	85.7103	89.7103	89.9172	89.8692	4.36973	4	61	0.00358344	3.52887	3.12355	3.16513	2.93337	3.08793	1.64104	-0.200965	-0.0119875	-1.06527	-0.362822	0.440932	0.0356151	0.0771979	-0.154567	1.35748	1.02499	1.05497	-1.11309	2.90622	0.220792	0.367621	-0.885272	0.00509202	0.825992	0.714428	0.379486	2.29311	0.0830242	0.146041	0.420804	0.0372902	0.945978	0.945978
hsa-piR-004309-gb-DQ575884-Homo	14	0.00150356	0.192921	0.194424	0.187078	0.00773337	0.992267	0.0387304	85.6819	89.6819	89.8888	89.8408	0.410583	4	61	0.800338	3.02114	3.08806	3.12337	2.91481	2.9527	0.0128052	0.773969	1.17569	-1.19678	-0.76569	0.0684387	0.135354	0.17067	-0.0378975	1.04858	1.09836	1.12558	-1.02662	0.436906	0.823132	0.786604	-0.210379	0.663722	0.413639	0.434559	0.834073	0.178013	0.383378	0.361951	0.0787961	0.945978	0.772746	0.772746
hsa-piR-004506-gb-DQ576200-Homo	15	0.00259436	0.204701	0.207295	0.199342	0.0125153	0.987485	0.0464596	89.5494	93.5494	93.7563	93.7083	0.419155	4	61	0.794197	2.9747	3.08994	3.12503	2.91538	2.95157	-0.401869	0.862556	1.2476	-1.05272	-0.655571	0.0231227	0.138364	0.173458	-0.0361966	1.01616	1.10066	1.12776	-1.02541	0.143218	0.815652	0.775719	-0.194948	0.88659	0.417873	0.440912	0.846082	0.0522772	0.378956	0.355648	0.0725877	0.945978	0.772746	0.772746
hsa-piR-004721-gb-DQ576479-Homo	16	0	0.178949	0.178949	0.173791	0	1	0.0336869	80.6734	82.6734	82.7412	82.7528	0.531634	4	61	0.712928	3.00901	3.0852	3.28803	3.04842	3.03748	-0.755159	-0.0752053	1.73498	-0.403498	-0.501117	-0.0284649	0.0477225	0.25055	0.010938	-1.01993	1.03363	1.18966	1.00761	-0.188875	0.302128	1.20005	0.0631155	0.850818	0.763582	0.234759	0.949881	0.0701635	0.117144	0.629378	0.0223308	0.945978	0.945978	0.732375
hsa-piR-004918-gb-DQ576766-Homo	17	0.00259436	0.204701	0.207295	0.199342	0.0125153	0.987485	0.0464596	89.5494	93.5494	93.7563	93.7083	0.419155	4	61	0.794197	2.9747	3.08994	3.12503	2.91538	2.95157	-0.401869	0.862556	1.2476	-1.05272	-0.655571	0.0231227	0.138364	0.173458	-0.0361966	1.01616	1.10066	1.12776	-1.02541	0.143218	0.815652	0.775719	-0.194948	0.88659	0.417873	0.440912	0.846082	0.0522772	0.378956	0.355648	0.0725877	0.945978	0.772746	0.772746
hsa-piR-004987-gb-DQ576872-Homo	18	0.103712	0.0932527	0.196965	0.190644	0.526552	0.473448	0.588229	56.9008	60.9008	61.1077	61.0597	3.43059	4	61	0.01355	4.30298	4.152	4.51905	4.0155	4.12079	0.414291	-0.358722	1.5206	-1.05763	-0.518537	0.182191	0.0312135	0.398263	-0.10529	1.13461	1.02187	1.31792	-1.07571	1.64983	0.263328	2.60532	-0.827884	0.104119	0.793185	0.0115162	0.410964	0.98247	0.100625	1.93869	0.386197	0.425606	0.945978	0.074763
hsa-piR-005076-gb-DQ577008-Homo	19	0.00259436	0.204701	0.207295	0.199342	0.0125153	0.987485	0.0464596	89.5494	93.5494	93.7563	93.7083	0.419155	4	61	0.794197	2.9747	3.08994	3.12503	2.91538	2.95157	-0.401869	0.862556	1.2476	-1.05272	-0.655571	0.0231227	0.138364	0.173458	-0.0361966	1.01616	1.10066	1.12776	-1.02541	0.143218	0.815652	0.775719	-0.194948	0.88659	0.417873	0.440912	0.846082	0.0522772	0.378956	0.355648	0.0725877	0.945978	0.772746	0.772746
hsa-piR-005799-gb-DQ577967-Homo	20	0.00493599	0.201805	0.206741	0.199365	0.0238753	0.976125	0.0678287	89.2532	93.2532	93.4601	93.4121	0.505287	4	61	0.731964	2.97439	3.11025	3.12792	2.91736	2.94859	-0.427131	0.977603	1.16032	-1.01683	-0.693961	0.0258062	0.161664	0.179335	-0.0312257	1.01805	1.11858	1.13236	-1.02188	0.160781	0.956771	0.806862	-0.169152	0.872797	0.34246	0.422881	0.866237	0.0590866	0.465391	0.373782	0.0623632	0.945978	0.772746	0.772746
hsa-piR-008112-gb-DQ581031-Homo	21	0.00973169	0.047426	0.0571577	0.06788	0.17026	0.82974	0.39086	6.43919	10.4392	10.6461	10.5981	4.32561	4	61	0.00381179	12.4055	12.2964	12.0445	12.1584	12.3286	1.1019	0.345098	-1.40298	-0.612511	0.568494	0.0768676	-0.0321929	-0.284103	-0.170191	1.05473	-1.02257	-1.21765	-1.12521	0.980359	-0.385303	-2.61797	-1.88585	0.330781	0.701353	0.0111402	0.0640786	0.480459	0.154063	1.95311	1.19329	0.772746	0.945978	0.0729836
hsa-piR-008113-gb-DQ581032-Homo	22	0	0.0831029	0.0831029	0.0889009	0	1	0.122744	33.8852	35.8852	35.953	35.9646	2.13375	4	61	0.0873917	11.1341	10.9286	10.8438	10.8975	11.0231	1.47171	-0.321364	-1.06134	-0.592396	0.503389	0.110976	-0.0945217	-0.179328	-0.125584	1.07996	-1.06771	-1.13236	-1.09095	1.08056	-0.878125	-1.2604	-1.06338	0.284145	0.383322	0.212324	0.291803	0.546459	0.416436	0.673002	0.534911	0.772746	0.772746	0.69427
hsa-piR-008114-gb-DQ581033-Homo	23	0.00777581	0.057785	0.0655608	0.0621793	0.118605	0.881395	0.179483	16.8138	20.8138	21.0207	20.9727	0.267497	4	61	0.897757	5.67655	5.61763	5.59244	5.59956	5.63191	1.58573	-0.179345	-0.93392	-0.720727	0.248259	0.0446455	-0.0142736	-0.0394617	-0.0323452	1.03143	-1.00994	-1.02773	-1.02267	0.51671	-0.155448	-0.329974	-0.325308	0.607227	0.876982	0.74255	0.746061	0.216649	0.0570095	0.129274	0.127226	0.909961	0.945978	0.945978
hsa-piR-009511-gb-DQ582838-Homo	24	0.00259436	0.204701	0.207295	0.199342	0.0125153	0.987485	0.0464596	89.5494	93.5494	93.7563	93.7083	0.419155	4	61	0.794197	2.9747	3.08994	3.12503	2.91538	2.95157	-0.401869	0.862556	1.2476	-1.05272	-0.655571	0.0231227	0.138364	0.173458	-0.0361966	1.01616	1.10066	1.12776	-1.02541	0.143218	0.815652	0.775719	-0.194948	0.88659	0.417873	0.440912	0.846082	0.0522772	0.378956	0.355648	0.0725877	0.945978	0.772746	0.772746
hsa-piR-010431-gb-DQ584049-Homo	25	0.00259436	0.204701	0.207295	0.199342	0.0125153	0.987485	0.0464596	89.5494	93.5494	93.7563	93.7083	0.419155	4	61	0.794197	2.9747	3.08994	3.12503	2.91538	2.95157	-0.401869	0.862556	1.2476	-1.05272	-0.655571	0.0231227	0.138364	0.173458	-0.0361966	1.01616	1.10066	1.12776	-1.02541	0.143218	0.815652	0.775719	-0.194948	0.88659	0.417873	0.440912	0.846082	0.0522772	0.378956	0.355648	0.0725877	0.945978	0.772746	0.772746
hsa-piR-012681-gb-DQ587153-Homo	26	0	0.164034	0.164034	0.158009	0	1	0.0257542	75.365	77.365	77.4328	77.4444	0.403133	4	61	0.805659	3.02863	3.09379	3.12112	2.91314	3.02753	-0.102287	0.709087	1.04933	-1.5402	-0.115931	0.00109582	0.0662613	0.0935878	-0.11439	1.00076	1.047	1.06702	-1.08252	0.00759456	0.438153	0.46819	-0.689418	0.993965	0.662823	0.641317	0.493174	0.00262879	0.178602	0.192927	0.307	0.997251	0.945978	0.937387
hsa-piR-012753-gb-DQ587269-Homo	27	0.00259436	0.204701	0.207295	0.199342	0.0125153	0.987485	0.0464596	89.5494	93.5494	93.7563	93.7083	0.419155	4	61	0.794197	2.9747	3.08994	3.12503	2.91538	2.95157	-0.401869	0.862556	1.2476	-1.05272	-0.655571	0.0231227	0.138364	0.173458	-0.0361966	1.01616	1.10066	1.12776	-1.02541	0.143218	0.815652	0.775719	-0.194948	0.88659	0.417873	0.440912	0.846082	0.0522772	0.378956	0.355648	0.0725877	0.945978	0.772746	0.772746
hsa-piR-015026-gb-DQ590548-Homo	28	0.00259436	0.204701	0.207295	0.199342	0.0125153	0.987485	0.0464596	89.5494	93.5494	93.7563	93.7083	0.419155	4	61	0.794197	2.9747	3.08994	3.12503	2.91538	2.95157	-0.401869	0.862556	1.2476	-1.05272	-0.655571	0.0231227	0.138364	0.173458	-0.0361966	1.01616	1.10066	1.12776	-1.02541	0.143218	0.815652	0.775719	-0.194948	0.88659	0.417873	0.440912	0.846082	0.0522772	0.378956	0.355648	0.0725877	0.945978	0.772746	0.772746
hsa-piR-015249-gb-DQ590830-Homo	29	0.0042497	0.20136	0.20561	0.198761	0.0206688	0.979331	0.0649734	88.9603	92.9603	93.1672	93.1192	0.536818	4	61	0.709191	2.97393	3.09321	3.17115	2.91646	2.94945	-0.437347	0.674656	1.40132	-0.9731	-0.665533	0.024476	0.143753	0.221698	-0.0329906	1.01711	1.10478	1.16611	-1.02313	0.152713	0.852433	0.998854	-0.178974	0.879129	0.397308	0.321811	0.858551	0.0559474	0.400872	0.492398	0.0662337	0.945978	0.772746	0.772746
hsa-piR-015254-gb-DQ590835-Homo	30	0.00259436	0.204701	0.207295	0.199342	0.0125153	0.987485	0.0464596	89.5494	93.5494	93.7563	93.7083	0.419155	4	61	0.794197	2.9747	3.08994	3.12503	2.91538	2.95157	-0.401869	0.862556	1.2476	-1.05272	-0.655571	0.0231227	0.138364	0.173458	-0.0361966	1.01616	1.10066	1.12776	-1.02541	0.143218	0.815652	0.775719	-0.194948	0.88659	0.417873	0.440912	0.846082	0.0522772	0.378956	0.355648	0.0725877	0.945978	0.772746	0.772746
hsa-piR-016440-gb-DQ592393-Homo	31	0.237998	0.181226	0.419224	0.387117	0.567711	0.432289	0.606629	98.4836	102.484	102.691	102.642	0.629501	4	61	0.64331	3.29088	3.36299	3.38591	3.11888	3.29655	-0.00156417	0.687222	0.906086	-1.64437	0.0526295	-0.00567402	0.0664411	0.0893559	-0.177674	-1.00394	1.04713	1.0639	-1.13106	-0.0368492	0.401843	0.419211	-1.00188	0.970726	0.689204	0.676534	0.320359	0.0129035	0.161652	0.16971	0.494363	0.986106	0.945978	0.945978
hsa-piR-016658-gb-DQ592931-Homo	32	0.105875	0.201454	0.30733	0.521947	0.344501	0.655499	0.671261	99.3975	103.398	103.604	103.556	18.4521	4	61	5.54802e-10	6.06112	4.86337	6.0656	5.92823	5.39041	0.759975	-1.51924	0.768499	0.507104	-0.516337	0.67071	-0.527032	0.675189	0.537824	1.59186	-1.44096	1.59681	1.45178	4.13816	-3.03659	3.00966	2.88186	0.00010909	0.00351689	0.00379934	0.00545083	3.96222	2.45384	2.42029	2.26354	0.00132398	0.0271495	0.028966
hsa-piR-016659-gb-DQ592932-Homo	33	0.0884823	0.388319	0.476802	1.2485	0.185575	0.814425	0.729644	135.164	139.164	139.371	139.323	32.9911	4	61	1.21655e-14	5.42527	4.06322	6.71584	6.17972	4.47041	0.0487006	-1.17115	1.20454	0.724385	-0.806471	0.95486	-0.40719	2.24543	1.70931	1.93839	-1.3261	4.74179	3.27004	4.25427	-1.7014	7.22824	6.61629	7.33391e-05	0.093961	9.38521e-10	1.05325e-08	4.13466	1.02705	9.02756	7.97747	0.000955774	0.395731	6.14858e-08
hsa-piR-016677-gb-DQ592953-Homo	34	0.0478434	0.136004	0.183848	0.175202	0.260234	0.739766	0.332946	73.2641	77.2641	77.471	77.423	1.27243	4	61	0.290654	3.47967	3.40447	3.60358	3.25244	3.31796	0.49481	-0.0520091	1.3959	-1.15758	-0.68112	0.161706	0.0865112	0.285618	-0.06552	1.11861	1.0618	1.21893	-1.04646	1.2156	0.60843	1.55128	-0.427824	0.228819	0.545161	0.126009	0.670286	0.640507	0.263475	0.899599	0.17374	0.718796	0.860333	0.489496
hsa-piR-016735-gb-DQ593039-Homo	35	0.0187745	0.154123	0.172897	0.174726	0.108587	0.891413	0.218845	76.3053	80.3053	80.5122	80.4642	1.46982	4	61	0.222413	3.24312	3.22785	3.13695	2.93645	3.04393	0.972857	0.854395	0.149552	-1.40512	-0.571679	0.199192	0.183915	0.093014	-0.107486	1.14806	1.13596	1.0666	-1.07735	1.41219	1.22773	0.476428	-0.662227	0.162975	0.224264	0.635472	0.51032	0.787878	0.64924	0.196904	0.292157	0.578408	0.71061	0.931871
hsa-piR-016742-gb-DQ593049-Homo	36	0.0108164	0.196325	0.207142	0.208775	0.0522177	0.947782	0.148335	88.8736	92.8736	93.0805	93.0325	1.24341	4	61	0.302128	3.06714	3.21658	3.44822	3.09604	3.30618	-1.02012	-0.065461	1.41424	-0.835517	0.506858	-0.239034	-0.0895912	0.142042	-0.210136	-1.1802	-1.06407	1.10347	-1.1568	-1.50621	-0.534223	0.646523	-1.15106	0.137173	0.595129	0.520366	0.254201	0.86273	0.225389	0.283691	0.594824	0.511551	0.89866	0.83645
hsa-piR-016745-gb-DQ593052-Homo	37	0.00408164	0.183606	0.187688	0.181269	0.021747	0.978253	0.0658529	83.3834	87.3834	87.5903	87.5423	0.491889	4	61	0.741664	2.9755	3.10819	3.1272	2.91644	3.05575	-0.684646	0.8018	1.01484	-1.34631	0.214316	-0.0802424	0.0524395	0.0714556	-0.139303	-1.0572	1.03702	1.05078	-1.10137	-0.524242	0.325551	0.337114	-0.791316	0.60201	0.745878	0.737188	0.431826	0.220396	0.127332	0.132422	0.364691	0.905256	0.945978	0.945978
hsa-piR-016792-gb-DQ593109-Homo	38	0.00259436	0.204701	0.207295	0.199342	0.0125153	0.987485	0.0464596	89.5494	93.5494	93.7563	93.7083	0.419155	4	61	0.794197	2.9747	3.08994	3.12503	2.91538	2.95157	-0.401869	0.862556	1.2476	-1.05272	-0.655571	0.0231227	0.138364	0.173458	-0.0361966	1.01616	1.10066	1.12776	-1.02541	0.143218	0.815652	0.775719	-0.194948	0.88659	0.417873	0.440912	0.846082	0.0522772	0.378956	0.355648	0.0725877	0.945978	0.772746	0.772746
hsa-piR-016945-gb-DQ593356-Homo	39	0.00212478	0.205589	0.207714	0.200326	0.0102293	0.989771	0.0452972	89.694	93.694	93.9008	93.8528	0.458043	4	61	0.766168	2.97474	3.08913	3.14727	2.91505	2.95214	-0.416881	0.748317	1.34055	-1.02491	-0.647083	0.0225994	0.136989	0.195131	-0.0370917	1.01579	1.09961	1.14483	-1.02604	0.139713	0.806366	0.870961	-0.199395	0.889347	0.423165	0.387191	0.842617	0.0509287	0.373491	0.412075	0.0743698	0.947313	0.772746	0.772746
hsa-piR-016946-gb-DQ593358-Homo	40	0.150877	0.181	0.331877	0.396118	0.454617	0.545383	0.61388	95.5727	99.5727	99.7796	99.7316	11.3464	4	61	6.0134e-07	5.13671	4.43592	4.66372	4.18791	4.39361	1.58228	-0.352414	0.276474	-1.03711	-0.46923	0.743107	0.0423138	0.270113	-0.205699	1.67378	1.02976	1.2059	-1.15325	4.8323	0.256543	1.26894	-1.16154	9.47759e-06	0.798395	0.209283	0.249949	5.0233	0.0977821	0.679266	0.602148	0.000176721	0.945978	0.688334
hsa-piR-017033-gb-DQ593538-Homo	41	0.0214089	0.257454	0.278863	0.306678	0.0767722	0.923228	0.248103	106.417	110.417	110.624	110.576	3.07227	4	61	0.022657	3.53334	3.63891	4.25633	3.3873	3.64582	-0.478613	-0.160841	1.69773	-0.918244	-0.140029	-0.112479	-0.0069139	0.610511	-0.258527	-1.08108	-1.0048	1.5268	-1.19626	-0.617951	-0.0358553	2.42308	-1.2345	0.538908	0.971515	0.0183727	0.22175	0.268486	0.0125506	1.73583	0.654136	0.855476	0.986161	0.108359
hsa-piR-017104-gb-DQ593636-Homo	42	0.00259436	0.204701	0.207295	0.199342	0.0125153	0.987485	0.0464596	89.5494	93.5494	93.7563	93.7083	0.419155	4	61	0.794197	2.9747	3.08994	3.12503	2.91538	2.95157	-0.401869	0.862556	1.2476	-1.05272	-0.655571	0.0231227	0.138364	0.173458	-0.0361966	1.01616	1.10066	1.12776	-1.02541	0.143218	0.815652	0.775719	-0.194948	0.88659	0.417873	0.440912	0.846082	0.0522772	0.378956	0.355648	0.0725877	0.945978	0.772746	0.772746
hsa-piR-017458-gb-DQ594126-Homo	43	0.00277799	0.206848	0.209626	0.20121	0.0132521	0.986748	0.0459497	90.2242	94.2242	94.4311	94.3831	0.389431	4	61	0.815403	2.97477	3.09013	3.12566	2.91559	2.9716	-0.461157	0.843481	1.24528	-1.13051	-0.497091	0.00317731	0.118535	0.154062	-0.0560076	1.0022	1.08563	1.1127	-1.03958	0.0195756	0.694967	0.685342	-0.300049	0.984446	0.489715	0.495724	0.76516	0.00680818	0.310057	0.30476	0.116248	0.993876	0.809999	0.816328
hsa-piR-017716-gb-DQ594453-Homo	44	0.0492007	0.166904	0.216105	0.219527	0.22767	0.77233	0.343754	84.8653	88.8653	89.0722	89.0242	2.27327	4	61	0.0715587	4.55646	4.41741	4.27109	4.10499	4.39925	1.21409	0.397019	-0.462723	-1.43873	0.290338	0.157211	0.0181557	-0.128161	-0.294265	1.11513	1.01266	-1.0929	-1.22626	1.06743	0.115437	-0.628714	-1.7356	0.289986	0.908478	0.531883	0.0876836	0.537623	0.0416857	0.274184	1.05708	0.772746	0.955794	0.848772
hsa-piR-017723-gb-DQ594464-Homo	45	0.0100469	0.16128	0.171327	0.164446	0.058642	0.941358	0.114567	77.1522	81.1522	81.3591	81.311	0.48532	4	61	0.746421	3.0899	3.09705	3.13651	2.92249	3.00752	0.457718	0.541156	1.00178	-1.4967	-0.503955	0.0823773	0.0895247	0.128982	-0.0850389	1.05876	1.06402	1.09352	-1.06072	0.572449	0.588293	0.647463	-0.513687	0.569122	0.558508	0.519762	0.609327	0.244795	0.252971	0.284196	0.21515	0.878959	0.872871	0.83645
hsa-piR-017724-gb-DQ594465-Homo	46	0.480907	0.434755	0.915662	1.22114	0.525201	0.474799	0.70027	150.774	154.774	154.981	154.933	14.6839	4	61	1.86137e-08	5.89486	4.97422	3.74543	4.61003	5.07287	1.32729	0.147085	-1.42814	-0.31978	0.273549	0.821991	-0.0986503	-1.32744	-0.462839	1.76784	-1.07077	-2.50957	-1.37825	3.4474	-0.385452	-4.02178	-1.68548	0.00103111	0.701244	0.000161576	0.0970064	2.9867	0.154131	3.79162	1.0132	0.00950345	0.945978	0.00187397
hsa-piR-017936-gb-DQ594740-Homo	47	0.00155185	0.200559	0.202111	0.194211	0.00767824	0.992322	0.0373326	88.0474	92.0474	92.2543	92.2063	0.391054	4	61	0.814252	2.97487	3.08809	3.12355	2.92701	2.95299	-0.441497	0.859107	1.26658	-0.991338	-0.692851	0.0218793	0.135092	0.17056	-0.0259821	1.01528	1.09816	1.1255	-1.01817	0.136991	0.805757	0.77099	-0.141462	0.891489	0.423513	0.443689	0.887971	0.049884	0.373133	0.352921	0.051601	0.948626	0.772746	0.772746
hsa-piR-018570-gb-DQ595536-Homo	48	0.108657	0.275657	0.384314	0.424519	0.28273	0.71727	0.443521	116.953	120.953	121.16	121.112	4.96512	4	61	0.00156883	5.47485	4.9342	4.46668	5.18201	5.07031	1.21257	-0.246726	-1.50865	0.422151	0.120653	0.404538	-0.136108	-0.60363	0.1117	1.32367	-1.09894	-1.51953	1.0805	2.13535	-0.671771	-2.30204	0.512117	0.0367562	0.504266	0.0247609	0.610419	1.43467	0.29734	1.60623	0.214372	0.189166	0.823643	0.136826
hsa-piR-018849-gb-DQ595899-Homo	49	0	0.131231	0.131231	0.126042	0	1	0.0229049	61.7547	63.7547	63.8225	63.8342	0.357488	4	61	0.837847	3.2517	3.16186	3.27797	3.11816	3.19132	0.790447	-0.588548	1.19359	-1.2592	-0.136289	0.0603812	-0.0294669	0.0866478	-0.0731629	1.04274	-1.02063	1.0619	-1.05202	0.467858	-0.217846	0.48463	-0.492987	0.641553	0.828276	0.629675	0.623792	0.192767	0.0818247	0.200884	0.20496	0.937387	0.945978	0.929402
hsa-piR-019420-gb-DQ596670-Homo	50	0	0.911417	0.911417	2.70824	0	1	0.684176	179.975	181.975	182.043	182.055	33.0363	4	61	1.18275e-14	3.52187	3.0852	6.47974	6.16169	2.95514	-0.530324	-0.782354	1.17683	0.993268	-0.85742	0.566735	0.13006	3.5246	3.20655	1.48117	1.09434	11.5083	9.23142	1.66629	0.364853	7.48034	8.19865	0.100783	0.716483	3.45369e-10	2.00359e-11	0.996614	0.144794	9.46172	10.6982	0.417602	0.945978	3.10065e-08
hsa-piR-019675-gb-DQ596992-Homo	51	0.00259436	0.204701	0.207295	0.199342	0.0125153	0.987485	0.0464596	89.5494	93.5494	93.7563	93.7083	0.419155	4	61	0.794197	2.9747	3.08994	3.12503	2.91538	2.95157	-0.401869	0.862556	1.2476	-1.05272	-0.655571	0.0231227	0.138364	0.173458	-0.0361966	1.01616	1.10066	1.12776	-1.02541	0.143218	0.815652	0.775719	-0.194948	0.88659	0.417873	0.440912	0.846082	0.0522772	0.378956	0.355648	0.0725877	0.945978	0.772746	0.772746
hsa-piR-019676-gb-DQ596993-Homo	52	0.00259436	0.204701	0.207295	0.199342	0.0125153	0.987485	0.0464596	89.5494	93.5494	93.7563	93.7083	0.419155	4	61	0.794197	2.9747	3.08994	3.12503	2.91538	2.95157	-0.401869	0.862556	1.2476	-1.05272	-0.655571	0.0231227	0.138364	0.173458	-0.0361966	1.01616	1.10066	1.12776	-1.02541	0.143218	0.815652	0.775719	-0.194948	0.88659	0.417873	0.440912	0.846082	0.0522772	0.378956	0.355648	0.0725877	0.945978	0.772746	0.772746
hsa-piR-019752-gb-DQ597110-Homo	53	0	0.27045	0.27045	0.359058	0	1	0.293131	105.866	107.866	107.934	107.945	6.32402	4	61	0.000252489	2.97511	3.0852	4.12411	3.14486	2.95514	-0.573813	-0.349621	1.76603	-0.228121	-0.614479	0.0199691	0.13006	1.16897	0.189724	1.01394	1.09434	2.24851	1.14055	0.107782	0.669781	4.55438	0.890513	0.914522	0.505525	2.56941e-05	0.376689	0.0388056	0.296258	4.59017	0.424017	0.96007	0.824624	0.000412467
hsa-piR-019912-gb-DQ597341-Homo	54	0	0.148694	0.148694	0.148245	0	1	0.058696	69.3756	71.3756	71.4434	71.4551	0.950929	4	61	0.440963	3.16105	3.1477	3.12112	2.91314	3.02037	0.842883	0.71554	0.462034	-1.52158	-0.49888	0.140681	0.12733	0.10075	-0.107228	1.10243	1.09227	1.07233	-1.07716	1.02405	0.884332	0.529382	-0.67877	0.309857	0.379989	0.598462	0.499851	0.508838	0.420229	0.222963	0.30116	0.772746	0.772746	0.901229
hsa-piR-019914-gb-DQ597347-Homo	55	0.103939	0.166753	0.270692	0.307293	0.383974	0.616026	0.539286	88.8426	92.8426	93.0495	93.0015	9.01087	4	61	8.72941e-06	3.85405	3.56344	4.63195	4.22683	3.96529	-0.481072	-1.20076	1.44534	0.442099	-0.205608	-0.111234	-0.401847	0.66666	0.261547	-1.08015	-1.3212	1.58739	1.19876	-0.754031	-2.54217	3.26488	1.5397	0.453731	0.0135719	0.00179811	0.128805	0.343201	1.86736	2.74518	0.890069	0.776416	0.0854499	0.0152399
hsa-piR-019951-gb-DQ597403-Homo	56	0	0.215143	0.215143	0.208547	0	1	0.0318584	91.9099	93.9099	93.9776	93.9893	0.501828	4	61	0.734468	2.99403	3.0852	3.20202	2.92564	2.95514	-0.341867	0.470311	1.51109	-0.951156	-0.688374	0.0388947	0.13006	0.246885	-0.0294968	1.02733	1.09434	1.18664	-1.02066	0.235373	0.750954	1.07845	-0.15523	0.814708	0.455568	0.285077	0.877153	0.0889982	0.341447	0.545037	0.0569247	0.945978	0.777673	0.772746
hsa-piR-020326-gb-DQ597916-Homo	57	0.0221564	0.145828	0.167984	0.190121	0.131896	0.868104	0.325276	73.7325	77.7325	77.9394	77.8914	4.68146	4	61	0.00232101	3.67255	3.20231	3.4624	3.59182	3.22614	1.14017	-1.07989	0.148056	0.75903	-0.967364	0.446406	-0.0238351	0.236262	0.365675	1.36264	-1.01666	1.17794	1.28848	3.25067	-0.16319	1.24301	2.31381	0.00187634	0.870908	0.218619	0.0240628	2.72669	0.0600277	0.660311	1.61865	0.0158476	0.945978	0.704381
hsa-piR-020365-gb-DQ597975-Homo	58	0	0.338424	0.338424	0.598263	0	1	0.469134	119.543	121.543	121.61	121.622	13.4766	4	61	6.26583e-08	3.07568	3.0852	4.67294	3.88137	2.95514	-0.623149	-0.610206	1.54823	0.472136	-0.787015	0.120539	0.13006	1.7178	0.926227	1.08714	1.09434	3.28935	1.9003	0.581603	0.598751	5.98292	3.88642	0.562977	0.551556	1.24868e-07	0.000253386	0.249509	0.258411	6.90355	3.59622	0.87478	0.864794	3.98264e-06
hsa-piR-020381-gb-DQ597997-Homo	59	0.00259436	0.204701	0.207295	0.199342	0.0125153	0.987485	0.0464596	89.5494	93.5494	93.7563	93.7083	0.419155	4	61	0.794197	2.9747	3.08994	3.12503	2.91538	2.95157	-0.401869	0.862556	1.2476	-1.05272	-0.655571	0.0231227	0.138364	0.173458	-0.0361966	1.01616	1.10066	1.12776	-1.02541	0.143218	0.815652	0.775719	-0.194948	0.88659	0.417873	0.440912	0.846082	0.0522772	0.378956	0.355648	0.0725877	0.945978	0.772746	0.772746
hsa-piR-020450-gb-DQ598104-Homo	60	0	0.199678	0.199678	0.204527	0	1	0.0837882	87.3595	89.3595	89.4273	89.439	1.39462	4	61	0.246479	3.2955	3.25377	3.12112	2.92564	3.23975	0.85708	0.57841	-0.307442	-1.61285	0.484807	0.0557455	0.0140165	-0.118635	-0.314112	1.0394	1.00976	-1.08571	-1.24325	0.350166	0.0840051	-0.537918	-1.71586	0.72742	0.933327	0.592591	0.0912634	0.138215	0.029966	0.227245	1.0397	0.945978	0.967245	0.897775
hsa-piR-020485-gb-DQ598159-Homo	61	0.00259436	0.204701	0.207295	0.199342	0.0125153	0.987485	0.0464596	89.5494	93.5494	93.7563	93.7083	0.419155	4	61	0.794197	2.9747	3.08994	3.12503	2.91538	2.95157	-0.401869	0.862556	1.2476	-1.05272	-0.655571	0.0231227	0.138364	0.173458	-0.0361966	1.01616	1.10066	1.12776	-1.02541	0.143218	0.815652	0.775719	-0.194948	0.88659	0.417873	0.440912	0.846082	0.0522772	0.378956	0.355648	0.0725877	0.945978	0.772746	0.772746
hsa-piR-020492-gb-DQ598170-Homo	62	0	0.183799	0.183799	0.177592	0	1	0.0287377	82.3047	84.3047	84.3725	84.3841	0.451217	4	61	0.771103	3.05436	3.0852	3.12112	2.91314	2.95514	0.323881	0.673588	1.08087	-1.27726	-0.801078	0.0992173	0.13006	0.165981	-0.0419972	1.07119	1.09434	1.12193	-1.02954	0.6496	0.812467	0.784434	-0.239117	0.51839	0.419683	0.435821	0.811816	0.285344	0.377078	0.360692	0.0905423	0.834934	0.772746	0.772746
hsa-piR-020496-gb-DQ598175-Homo	63	0.169132	0.180637	0.34977	0.371054	0.483553	0.516447	0.589293	96.1615	100.162	100.368	100.32	5.86658	4	61	0.000462614	4.53249	4.05622	3.85154	4.06971	3.9104	1.67612	-0.104101	-0.869183	-0.0536767	-0.649163	0.622084	0.14582	-0.0588619	0.15931	1.5391	1.10636	-1.04164	1.11675	4.04857	0.884509	-0.276742	0.900288	0.00014768	0.379895	0.782914	0.371508	3.83068	0.420337	0.106286	0.430032	0.00173775	0.772746	0.945978
hsa-piR-020499-gb-DQ598183-Homo	64	0.00436186	0.199652	0.204014	0.197977	0.0213802	0.97862	0.0697019	88.476	92.476	92.6829	92.6349	0.600221	4	61	0.663891	2.97457	3.09285	3.19426	2.91645	2.94922	-0.440881	0.583611	1.46193	-0.944285	-0.660378	0.0253422	0.143626	0.245034	-0.0327789	1.01772	1.10468	1.18512	-1.02298	0.15878	0.855152	1.10863	-0.17857	0.874367	0.395813	0.27194	0.858867	0.0583063	0.402509	0.565526	0.0660739	0.945978	0.772746	0.772746
hsa-piR-020500-gb-DQ598190-Homo	65	0.00231821	0.195481	0.197799	0.190229	0.01172	0.98828	0.0451928	86.6966	90.6966	90.9035	90.8555	0.417406	4	61	0.795452	2.99364	3.08956	3.12466	2.91539	2.95169	-0.238745	0.834108	1.22672	-1.11404	-0.708047	0.0419568	0.137872	0.172973	-0.0362968	1.02951	1.10028	1.12738	-1.02548	0.265956	0.8319	0.791649	-0.200065	0.79117	0.40871	0.431633	0.842095	0.10173	0.388585	0.364885	0.0746387	0.945978	0.772746	0.772746
hsa-piR-020813-gb-DQ598646-Homo	66	0.0411336	0.237815	0.278949	0.395255	0.147459	0.852541	0.472779	104.075	108.075	108.282	108.234	9.55885	4	61	4.56873e-06	3.67321	3.92512	3.66934	3.07337	4.27321	-0.113082	0.460735	-0.121889	-1.47937	1.25361	-0.600007	-0.348089	-0.603873	-1.19984	-1.51572	-1.27287	-1.51979	-2.29714	-3.41959	-1.86371	-2.48661	-5.94162	0.0011235	0.067178	0.0156492	1.46475e-07	2.94943	1.17277	1.80551	6.83424	0.0102382	0.302676	0.0957923
hsa-piR-020815-gb-DQ598651-Homo	67	0.00259436	0.204701	0.207295	0.199342	0.0125153	0.987485	0.0464596	89.5494	93.5494	93.7563	93.7083	0.419155	4	61	0.794197	2.9747	3.08994	3.12503	2.91538	2.95157	-0.401869	0.862556	1.2476	-1.05272	-0.655571	0.0231227	0.138364	0.173458	-0.0361966	1.01616	1.10066	1.12776	-1.02541	0.143218	0.815652	0.775719	-0.194948	0.88659	0.417873	0.440912	0.846082	0.0522772	0.378956	0.355648	0.0725877	0.945978	0.772746	0.772746
hsa-piR-020893-gb-DQ598752-Homo	68	0.00307985	0.152674	0.155754	0.156686	0.0197738	0.980226	0.100101	72.0315	76.0315	76.2384	76.1904	1.19499	4	61	0.322155	3.10651	3.11516	3.33036	2.98451	2.94922	0.062639	0.120451	1.56019	-0.753601	-0.989678	0.157296	0.165938	0.381144	0.0352879	1.1152	1.1219	1.30237	1.02476	1.12719	1.13031	1.97229	0.219873	0.264076	0.26277	0.0531151	0.826704	0.578272	0.580425	1.27478	0.08265	0.772746	0.772746	0.255966
hsa-piR-021032-gb-DQ598918-Homo	69	0.0119891	0.219295	0.231285	0.230088	0.0518372	0.948163	0.136644	95.6067	99.6067	99.8136	99.7656	1.01483	4	61	0.406881	4.77052	4.64285	4.53085	4.47312	4.51222	1.52643	0.470796	-0.45525	-0.93265	-0.609324	0.258298	0.13063	0.0186337	-0.0391031	1.19607	1.09477	1.013	-1.02747	1.54004	0.737062	0.0802508	-0.202672	0.128721	0.46391	0.936301	0.840066	0.890349	0.333566	0.0285847	0.0756866	0.493552	0.784183	0.968981
hsa-piR-021462-gb-DQ599459-Homo	70	0.0450238	0.243875	0.288899	0.341501	0.155846	0.844154	0.375455	105.878	109.878	110.085	110.036	4.14428	4	61	0.00491757	5.12616	5.02606	4.62382	4.69051	5.39235	0.485865	0.170832	-1.0951	-0.885206	1.3236	-0.266188	-0.366289	-0.768532	-0.70184	-1.20263	-1.28903	-1.70354	-1.62658	-1.49772	-1.93533	-3.12428	-3.43109	0.139363	0.0575895	0.00272709	0.00108438	0.855853	1.23966	2.5643	2.96482	0.515749	0.270014	0.0219617
hsa-piR-023279-gb-DQ601838-Homo	71	0.00259436	0.204701	0.207295	0.199342	0.0125153	0.987485	0.0464596	89.5494	93.5494	93.7563	93.7083	0.419155	4	61	0.794197	2.9747	3.08994	3.12503	2.91538	2.95157	-0.401869	0.862556	1.2476	-1.05272	-0.655571	0.0231227	0.138364	0.173458	-0.0361966	1.01616	1.10066	1.12776	-1.02541	0.143218	0.815652	0.775719	-0.194948	0.88659	0.417873	0.440912	0.846082	0.0522772	0.378956	0.355648	0.0725877	0.945978	0.772746	0.772746
hsa-let-7a-3p	72	0	0.215867	0.215867	0.210499	0	1	0.0376053	92.1149	94.1149	94.1826	94.1943	0.59589	4	61	0.666956	3.73528	3.65904	3.6629	3.49399	3.55618	1.18979	0.39273	0.433056	-1.33286	-0.682714	0.179105	0.102866	0.106723	-0.0621865	1.13218	1.0739	1.07678	-1.04405	1.08204	0.59294	0.465409	-0.326712	0.283494	0.555413	0.643296	0.745004	0.547456	0.255384	0.191589	0.127841	0.772746	0.870279	0.938362
hsa-let-7a-5p	73	0.00787461	0.0166929	0.0245675	0.0282625	0.320529	0.679471	0.495842	-53.1303	-49.1303	-48.9234	-48.9714	5.89805	4	61	0.000443605	15.7849	15.7636	15.5524	15.6275	15.7678	0.82698	0.621668	-1.4182	-0.692669	0.662225	0.0170637	-0.0042005	-0.21547	-0.140326	1.0119	-1.00292	-1.16108	-1.10215	0.365836	-0.0841371	-3.33752	-2.61293	0.715753	0.933223	0.00144406	0.0112887	0.145237	0.0300146	2.84042	1.94736	0.945978	0.967245	0.0126505
hsa-let-7b-3p	74	0.0040279	0.0921824	0.0962103	0.0981425	0.0418656	0.958134	0.144615	42.3018	46.3018	46.5087	46.4607	1.47459	4	61	0.22096	3.60878	3.51266	3.54715	3.38879	3.38955	1.22139	0.238103	0.590976	-1.0291	-1.02137	0.219228	0.123112	0.157605	-0.000755946	1.16411	1.08908	1.11543	-1.00052	2.01759	1.07353	1.04765	-0.00604822	0.0480389	0.287262	0.298935	0.995194	1.31841	0.541721	0.524423	0.00209226	0.236679	0.772746	0.772746
hsa-let-7b-5p	75	0.0431431	0.0250406	0.0681837	0.072077	0.632748	0.367252	0.708805	-20.4985	-16.4985	-16.2916	-16.3396	7.66588	4	61	4.51751e-05	13.6687	13.7794	13.4386	13.5612	13.7792	0.158593	0.912247	-1.40849	-0.573397	0.911051	-0.11048	0.00017548	-0.340568	-0.217954	-1.07959	1.00012	-1.26625	-1.16308	-1.92965	0.00285291	-4.29695	-3.30518	0.0583042	0.997733	6.32982e-05	0.00159267	1.2343	0.000985653	4.19861	2.79787	0.272311	0.998723	0.000847707
hsa-let-7c-5p	76	0.0085114	0.0163308	0.0248422	0.0305478	0.342619	0.657381	0.544606	-53.9125	-49.9125	-49.7056	-49.7537	5.9807	4	61	0.000397395	9.22689	9.18219	9.39566	9.30676	9.12772	-0.198656	-0.622462	1.40141	0.558598	-1.1389	0.099173	0.0544715	0.267942	0.179045	1.07116	1.03848	1.20409	1.13213	2.14911	1.10237	4.19495	3.36969	0.0356019	0.274633	8.98919e-05	0.00130929	1.44853	0.561248	4.04628	2.88296	0.185589	0.772746	0.00111743
hsa-let-7d-3p	77	0.000172422	0.141512	0.141685	0.161812	0.00121694	0.998783	0.180177	66.4237	70.4237	70.6306	70.5826	3.30327	4	61	0.0162606	5.60424	5.21505	5.39859	5.37539	5.19789	1.49265	-0.868769	0.244854	0.104109	-0.972847	0.406344	0.0171533	0.200692	0.177495	1.32532	1.01196	1.14925	1.13092	3.03146	0.122066	1.08079	1.15152	0.00356912	0.903248	0.284046	0.25401	2.44744	0.0441929	0.546611	0.595149	0.0274652	0.954019	0.772746
hsa-let-7d-5p	78	0.00280484	0.0450116	0.0478164	0.0643845	0.0586585	0.941341	0.368843	-0.696601	3.3034	3.5103	3.46228	7.23882	4	61	7.74241e-05	11.3387	11.321	10.8748	11.1217	11.312	0.729838	0.640602	-1.60365	-0.361984	0.595191	0.0267707	0.00902882	-0.437177	-0.190307	1.01873	1.00628	-1.35395	-1.14101	0.352141	0.112307	-4.15403	-2.17602	0.725946	0.910948	0.00010336	0.0334366	0.139095	0.0405062	3.98565	1.47578	0.945978	0.957562	0.00126537
hsa-let-7e-5p	79	0.0509743	0.144693	0.195667	0.183619	0.260516	0.739484	0.322885	77.0492	81.0492	81.2561	81.208	0.423414	4	61	0.79114	4.64605	4.56888	4.52909	4.60949	4.47714	1.20594	0.0414974	-0.558905	0.654372	-1.34291	0.168905	0.0917405	0.0519536	0.132354	1.1242	1.06566	1.03667	1.09608	1.231	0.625528	0.27357	0.837873	0.223048	0.533958	0.785339	0.405373	0.651602	0.272493	0.104943	0.392145	0.708607	0.850403	0.945978
hsa-let-7f-1-3p	80	0.00298804	0.181652	0.18464	0.177429	0.016183	0.983817	0.0519809	82.4514	86.4514	86.6583	86.6102	0.413608	4	61	0.798173	2.98888	3.09038	3.12573	2.91559	2.97995	-0.36293	0.81684	1.22772	-1.21485	-0.466783	0.00893478	0.110434	0.145784	-0.0643586	1.00621	1.07955	1.10633	-1.04562	0.0587216	0.690328	0.691832	-0.36779	0.953366	0.492606	0.491668	0.714303	0.0207404	0.3075	0.308328	0.146118	0.975356	0.812851	0.811855
hsa-let-7f-2-3p	81	0.00259436	0.204701	0.207295	0.199342	0.0125153	0.987485	0.0464596	89.5494	93.5494	93.7563	93.7083	0.419155	4	61	0.794197	2.9747	3.08994	3.12503	2.91538	2.95157	-0.401869	0.862556	1.2476	-1.05272	-0.655571	0.0231227	0.138364	0.173458	-0.0361966	1.01616	1.10066	1.12776	-1.02541	0.143218	0.815652	0.775719	-0.194948	0.88659	0.417873	0.440912	0.846082	0.0522772	0.378956	0.355648	0.0725877	0.945978	0.772746	0.772746
hsa-let-7f-5p	82	0.0057381	0.0181755	0.0239136	0.0270652	0.239952	0.760048	0.421385	-50.0538	-46.0538	-45.8469	-45.8949	4.05711	4	61	0.00556061	16.3289	16.3953	16.2184	16.2043	16.3309	0.408606	1.22335	-0.946513	-1.11914	0.433695	-0.00204587	0.06439	-0.112545	-0.126621	-1.00142	1.04564	-1.08113	-1.09173	-0.0420847	1.23989	-1.67268	-2.26255	0.966569	0.219766	0.099512	0.0272362	0.0147673	0.65804	1.00212	1.56485	0.983199	0.705593	0.413043
hsa-let-7g-3p	83	0.0175023	0.159419	0.176921	0.170869	0.098927	0.901073	0.171168	78.0184	82.0184	82.2253	82.1772	0.850179	4	61	0.499033	3.07756	3.26287	3.21636	3.05832	3.02956	-0.495021	1.29053	0.842424	-0.680403	-0.957529	0.0479995	0.233305	0.186801	0.0287604	1.03383	1.17553	1.13824	1.02014	0.334739	1.53306	0.94117	0.174309	0.73897	0.130431	0.35033	0.8622	0.131373	0.884618	0.455523	0.0643919	0.945978	0.496335	0.772746
hsa-let-7g-5p	84	0.00322507	0.0176548	0.0208799	0.0211601	0.154458	0.845542	0.270094	-54.3309	-50.3309	-50.124	-50.172	1.67851	4	61	0.166546	13.55	13.5693	13.6875	13.5404	13.5255	-0.376706	-0.0808684	1.73487	-0.524585	-0.752714	0.0244796	0.0437398	0.161952	0.0148521	1.01711	1.03078	1.1188	1.01035	0.511939	0.859029	2.44706	0.269869	0.610542	0.393688	0.0172983	0.788172	0.214284	0.404848	1.762	0.103379	0.911232	0.772746	0.103278
hsa-let-7i-3p	85	0.0531801	0.135957	0.189137	0.195367	0.281172	0.718828	0.403506	73.7964	77.7964	78.0033	77.9553	2.8295	4	61	0.0321344	3.6523	3.68804	4.04062	3.66395	3.42771	-0.191841	-0.0294825	1.57263	-0.138925	-1.21238	0.224592	0.260323	0.612904	0.236238	1.16845	1.19775	1.52933	1.17792	1.6881	1.82962	3.32834	1.54227	0.0964991	0.0721948	0.00148485	0.128181	1.01548	1.14149	2.82832	0.892175	0.4033	0.321101	0.0128545
hsa-let-7i-5p	86	0.0808556	0.016015	0.0968705	0.109725	0.834676	0.165324	0.87836	-40.5629	-36.5629	-36.356	-36.404	20.6582	4	61	8.40611e-11	13.9443	14.11	13.7273	13.8165	14.1552	-0.034722	0.866959	-1.21516	-0.729749	1.11267	-0.210923	-0.0451685	-0.42792	-0.338688	-1.15743	-1.0318	-1.34529	-1.26461	-4.60348	-0.91658	-6.7462	-6.41728	2.15802e-05	0.362972	6.31427e-09	2.30064e-08	4.66595	0.440127	8.19968	7.63815	0.000351076	0.772746	3.40129e-07
hsa-miR-100-5p	87	0	0.398894	0.398894	0.43593	0	1	0.141268	129.571	131.571	131.639	131.65	2.50874	4	61	0.0510085	2.97511	3.0852	3.82013	3.27691	2.95514	-0.691703	-0.383888	1.67099	0.152134	-0.747537	0.0199691	0.13006	0.864995	0.32177	1.01394	1.09434	1.82133	1.24986	0.0887484	0.551503	2.77495	1.2436	0.929573	0.583303	0.00731842	0.218406	0.0317167	0.234106	2.13558	0.660735	0.966245	0.889812	0.0509766
hsa-miR-101-3p	88	0.0807152	0.0901877	0.170903	0.192811	0.472287	0.527713	0.605141	53.5135	57.5135	57.7204	57.6724	9.39987	4	61	5.5057e-06	12.443	12.2297	12.742	12.613	12.0195	0.115491	-0.618738	1.14492	0.70071	-1.34238	0.42349	0.210208	0.722522	0.593486	1.34117	1.15685	1.65006	1.50889	3.90083	1.80488	4.80791	4.74696	0.000241618	0.0760292	1.0354e-05	1.29053e-05	3.61687	1.11902	4.98489	4.88923	0.00267435	0.333867	0.000191589
hsa-miR-101-5p	89	0.0779872	0.152693	0.230681	0.258952	0.338075	0.661925	0.497484	82.3319	86.3319	86.5388	86.4907	6.06861	4	61	0.000353639	3.76252	3.60652	4.1739	3.80398	3.29214	0.108328	-0.378602	1.39245	0.237769	-1.35995	0.470375	0.314383	0.881756	0.511843	1.38547	1.24348	1.84262	1.42587	3.3337	2.08098	4.51492	3.15051	0.00146091	0.0416414	2.95451e-05	0.00252524	2.83538	1.38047	4.52952	2.5977	0.0127383	0.211169	0.000462047
hsa-miR-103a-2-5p	90	0	0.284464	0.284464	0.290228	0	1	0.0801766	108.947	110.947	111.015	111.027	1.32927	4	61	0.269292	2.97511	3.0852	3.51002	3.06528	2.95514	-0.63266	-0.145741	1.73321	-0.233826	-0.720982	0.0199691	0.13006	0.554885	0.110144	1.01394	1.09434	1.46905	1.07934	0.105093	0.653075	2.10794	0.504093	0.916647	0.516162	0.0391524	0.616012	0.0377981	0.287214	1.40724	0.210411	0.960096	0.833007	0.199381
hsa-miR-103a-3p	91	0.00511242	0.0497528	0.0548652	0.0817814	0.0931814	0.906819	0.458482	6.77397	10.774	10.9809	10.9328	10.4587	4	61	1.62041e-06	12.8062	12.8935	13.2773	13.2459	12.8936	-0.983723	-0.588181	1.15077	1.00849	-0.587362	-0.0874861	-0.000180593	0.383648	0.352243	-1.06252	-1.00013	1.30464	1.27654	-1.09242	-0.00212571	3.46095	3.8226	0.278945	0.998311	0.000988721	0.000312423	0.554481	0.000734202	3.00493	3.50526	0.772746	0.998723	0.00921792
hsa-miR-103b	92	0.00950686	0.100719	0.110226	0.114797	0.0862489	0.913751	0.217069	49.5347	53.5347	53.7416	53.6935	2.13525	4	61	0.087205	8.20511	8.09237	8.45373	8.37057	8.2975	-0.558816	-1.35885	1.20549	0.615351	0.0968293	-0.092393	-0.205134	0.156232	0.0730697	-1.06614	-1.15279	1.11437	1.05195	-0.811133	-1.69858	0.990895	0.557537	0.420443	0.0944948	0.325651	0.579201	0.376293	1.02459	0.487247	0.237171	0.772746	0.396976	0.772746
hsa-miR-106a-3p	93	0.00259436	0.204701	0.207295	0.199342	0.0125153	0.987485	0.0464596	89.5494	93.5494	93.7563	93.7083	0.419155	4	61	0.794197	2.9747	3.08994	3.12503	2.91538	2.95157	-0.401869	0.862556	1.2476	-1.05272	-0.655571	0.0231227	0.138364	0.173458	-0.0361966	1.01616	1.10066	1.12776	-1.02541	0.143218	0.815652	0.775719	-0.194948	0.88659	0.417873	0.440912	0.846082	0.0522772	0.378956	0.355648	0.0725877	0.945978	0.772746	0.772746
hsa-miR-106a-5p	94	0.0350894	0.174255	0.209344	0.217311	0.167616	0.832384	0.300506	85.7402	89.7402	89.9471	89.8991	1.36886	4	61	0.255256	6.95387	6.81269	6.75817	6.66923	7.01702	0.785311	-0.207453	-0.590922	-1.21637	1.22943	-0.0631542	-0.204325	-0.258855	-0.347793	-1.04475	-1.15215	-1.19653	-1.27261	-0.420234	-1.27603	-1.24449	-2.01068	0.675791	0.206781	0.218079	0.0487851	0.170187	0.68449	0.661386	1.31171	0.945978	0.682604	0.704381
hsa-miR-106b-3p	95	0.00144093	0.0536844	0.0551253	0.0954544	0.0261391	0.973861	0.482869	8.58854	12.5885	12.7954	12.7474	13.1952	4	61	8.37195e-08	10.5382	10.8921	10.4153	10.4673	10.9311	-0.452897	0.996186	-0.956177	-0.743025	1.15591	-0.39289	-0.0390075	-0.515796	-0.463742	-1.31302	-1.02741	-1.42978	-1.37911	-4.74486	-0.447334	-4.4985	-4.86941	1.30035e-05	0.656218	3.13078e-05	8.28151e-06	4.88594	0.182952	4.50435	5.08189	0.000230076	0.945978	0.000472831
hsa-miR-106b-5p	96	0.019394	0.115408	0.134802	0.139805	0.14387	0.85613	0.276033	59.8554	63.8554	64.0623	64.0143	2.15983	4	61	0.0841919	6.76907	6.52692	6.47858	6.50427	6.47507	1.76292	-0.192752	-0.583091	-0.375625	-0.611452	0.293998	0.0518441	0.00351176	0.0292005	1.22603	1.03659	1.00244	1.02045	2.40554	0.398582	0.0207604	0.207601	0.0191957	0.691593	0.983505	0.836232	1.7168	0.160149	0.00722365	0.0776731	0.112392	0.945978	0.99334
hsa-miR-107	97	0.0194757	0.030844	0.0503198	0.0506954	0.38704	0.61296	0.483572	-14.0239	-10.0239	-9.81699	-9.865	2.0343	4	61	0.100725	10.9559	10.9922	11.1044	11.1171	11.054	-1.27163	-0.75089	0.854374	1.03512	0.133028	-0.0981601	-0.0617698	0.050409	0.0630397	-1.07041	-1.04375	1.03556	1.04466	-1.54713	-0.908531	0.573997	0.862858	0.127004	0.367173	0.568081	0.391595	0.896183	0.435129	0.24559	0.407162	0.490219	0.772746	0.878767
hsa-miR-10a-3p	98	0	0.257162	0.257162	0.254182	0	1	0.0505355	102.792	104.792	104.86	104.872	0.811686	4	61	0.522592	2.97511	3.0852	3.3626	3.03332	2.95514	-0.65027	0.0177538	1.70102	-0.297062	-0.771441	0.0199691	0.13006	0.407464	0.0781781	1.01394	1.09434	1.32635	1.05568	0.110532	0.686869	1.62801	0.376309	0.912351	0.494768	0.108678	0.707993	0.0398382	0.305598	0.963859	0.149971	0.958621	0.815308	0.439791
hsa-miR-10a-5p	99	0	0.449464	0.449464	1.0863	0	1	0.611706	136.852	138.852	138.919	138.931	24.0244	4	61	5.79302e-12	4.3081	4.00205	6.63381	5.41869	4.07432	-0.512394	-0.783096	1.54472	0.469939	-0.71917	0.233775	-0.072272	2.55949	1.34437	1.17591	-1.05137	5.895	2.5392	0.978772	-0.288706	7.73529	4.8948	0.331559	0.773785	1.25617e-10	7.54978e-06	0.479439	0.11138	9.90095	5.12207	0.772746	0.945978	1.26873e-08
hsa-miR-10b-3p	100	0	0.206525	0.206525	0.197745	0	1	0.0198669	89.4162	91.4162	91.484	91.4956	0.309111	4	61	0.87081	2.97511	3.0852	3.12112	2.96005	2.95514	-0.567404	0.845361	1.30632	-0.760612	-0.823663	0.0199691	0.13006	0.165981	0.0049133	1.01394	1.09434	1.12193	1.00341	0.12334	0.766461	0.740016	0.0263906	0.902244	0.446358	0.462129	0.979032	0.0446761	0.350317	0.335237	0.00920314	0.953373	0.773063	0.78281
hsa-miR-10b-5p	101	0	0.700755	0.700755	1.93612	0	1	0.660335	163.942	165.942	166.01	166.021	29.6472	4	61	1.05236e-13	3.03826	3.0852	6.61604	4.67143	2.95514	-0.65063	-0.621121	1.59857	0.376071	-0.702885	0.0831209	0.13006	3.6609	1.71629	1.05931	1.09434	12.6486	3.28589	0.278713	0.416096	8.86085	5.0046	0.781408	0.6788	1.47495e-12	5.05028e-06	0.107122	0.168258	11.8312	5.29668	0.945978	0.945978	7.15055e-10
hsa-miR-1180-3p	102	0.0846148	0.102676	0.187291	0.3144	0.451783	0.548217	0.723988	60.9212	64.9212	65.1281	65.0801	22.7504	4	61	1.55179e-11	6.40273	5.86758	5.16951	5.54359	5.86621	1.38837	0.214263	-1.31731	-0.496578	0.211252	0.536515	0.00137224	-0.696697	-0.322619	1.45046	1.00095	-1.62079	-1.2506	4.63232	0.0110468	-4.34564	-2.41883	1.94717e-05	0.991222	5.34677e-05	0.0185691	4.7106	0.00382899	4.27191	1.73121	0.000321341	0.996546	0.000749166
hsa-miR-1180-5p	103	0.00259436	0.204701	0.207295	0.199342	0.0125153	0.987485	0.0464596	89.5494	93.5494	93.7563	93.7083	0.419155	4	61	0.794197	2.9747	3.08994	3.12503	2.91538	2.95157	-0.401869	0.862556	1.2476	-1.05272	-0.655571	0.0231227	0.138364	0.173458	-0.0361966	1.01616	1.10066	1.12776	-1.02541	0.143218	0.815652	0.775719	-0.194948	0.88659	0.417873	0.440912	0.846082	0.0522772	0.378956	0.355648	0.0725877	0.945978	0.772746	0.772746
hsa-miR-1185-1-3p	104	0.00259436	0.204701	0.207295	0.199342	0.0125153	0.987485	0.0464596	89.5494	93.5494	93.7563	93.7083	0.419155	4	61	0.794197	2.9747	3.08994	3.12503	2.91538	2.95157	-0.401869	0.862556	1.2476	-1.05272	-0.655571	0.0231227	0.138364	0.173458	-0.0361966	1.01616	1.10066	1.12776	-1.02541	0.143218	0.815652	0.775719	-0.194948	0.88659	0.417873	0.440912	0.846082	0.0522772	0.378956	0.355648	0.0725877	0.945978	0.772746	0.772746
hsa-miR-1185-5p	105	0.00259436	0.204701	0.207295	0.199342	0.0125153	0.987485	0.0464596	89.5494	93.5494	93.7563	93.7083	0.419155	4	61	0.794197	2.9747	3.08994	3.12503	2.91538	2.95157	-0.401869	0.862556	1.2476	-1.05272	-0.655571	0.0231227	0.138364	0.173458	-0.0361966	1.01616	1.10066	1.12776	-1.02541	0.143218	0.815652	0.775719	-0.194948	0.88659	0.417873	0.440912	0.846082	0.0522772	0.378956	0.355648	0.0725877	0.945978	0.772746	0.772746
hsa-miR-1199-5p	106	0	0.135871	0.135871	0.143296	0	1	0.110167	63.8745	65.8745	65.9423	65.954	1.88804	4	61	0.123997	3.32169	3.09379	3.12112	3.05723	3.00014	1.66125	-0.204693	0.0190508	-0.504071	-0.97154	0.32155	0.093657	0.120983	0.0570932	1.24967	1.06707	1.08748	1.04037	2.44858	0.68047	0.665017	0.37808	0.0172322	0.498781	0.508546	0.706684	1.76366	0.30209	0.29367	0.150775	0.103138	0.81876	0.826771
hsa-miR-122-3p	107	0.00502732	0.2127	0.217728	0.207634	0.0230899	0.97691	0.0561217	92.4223	96.4223	96.6292	96.5812	0.326071	4	61	0.859424	2.97478	3.09345	3.12982	2.97935	2.94854	-0.623707	0.844652	1.29471	-0.567218	-0.948439	0.0262425	0.144905	0.181275	0.0308075	1.01836	1.10566	1.13389	1.02158	0.159269	0.835502	0.794484	0.16257	0.873983	0.406696	0.429994	0.871395	0.058497	0.39073	0.366538	0.0597852	0.945978	0.772746	0.772746
hsa-miR-122-5p	108	0	3.17191	3.17191	10.9731	0	1	0.728726	256.048	258.048	258.116	258.127	40.9662	4	61	1.21599e-16	4.83317	4.24947	11.7809	10.4528	4.54293	-0.642919	-0.80338	1.26705	0.901957	-0.722705	0.290233	-0.293463	7.23796	5.9099	1.22284	-1.22558	150.953	60.1253	0.457422	-0.441292	8.23429	8.09995	0.648993	0.660562	1.74016e-11	2.96089e-11	0.18776	0.180086	10.7594	10.5286	0.943141	0.945978	2.63635e-09
hsa-miR-1226-3p	109	0	0.153358	0.153358	0.150123	0	1	0.0413149	71.2597	73.2597	73.3275	73.3391	0.657204	4	61	0.624088	3.12016	3.0852	3.12112	2.93814	2.95514	0.844815	0.457275	0.85549	-1.173	-0.984577	0.165018	0.13006	0.165981	-0.0169965	1.12118	1.09434	1.12193	-1.01185	1.18279	0.889454	0.858765	-0.105942	0.241483	0.377253	0.393832	0.915976	0.617113	0.423367	0.404689	0.038116	0.744727	0.772746	0.772746
hsa-miR-1246	110	0	0.544631	0.544631	0.690912	0	1	0.260232	148.567	150.567	150.635	150.646	5.36456	4	61	0.000909104	2.97511	3.0852	4.47426	3.19227	2.95514	-0.561759	-0.39058	1.76925	-0.2241	-0.592808	0.0199691	0.13006	1.51912	0.237129	1.01394	1.09434	2.86616	1.17864	0.0759518	0.471983	4.17072	0.784325	0.939706	0.638623	9.76464e-05	0.435884	0.027008	0.194755	4.01034	0.360629	0.970122	0.934796	0.0012015
hsa-miR-1249-3p	111	0.00259436	0.204701	0.207295	0.199342	0.0125153	0.987485	0.0464596	89.5494	93.5494	93.7563	93.7083	0.419155	4	61	0.794197	2.9747	3.08994	3.12503	2.91538	2.95157	-0.401869	0.862556	1.2476	-1.05272	-0.655571	0.0231227	0.138364	0.173458	-0.0361966	1.01616	1.10066	1.12776	-1.02541	0.143218	0.815652	0.775719	-0.194948	0.88659	0.417873	0.440912	0.846082	0.0522772	0.378956	0.355648	0.0725877	0.945978	0.772746	0.772746
hsa-miR-1255a	112	0.243255	0.125732	0.368987	0.36622	0.659251	0.340749	0.712495	78.693	82.693	82.8999	82.8519	6.23452	4	61	0.000284032	4.07827	4.05731	3.39636	3.70143	4.06828	0.716533	0.647618	-1.52541	-0.522406	0.683663	0.00999787	-0.0109635	-0.671918	-0.366842	1.00695	-1.00763	-1.59319	-1.28953	0.0779214	-0.079521	-3.78288	-2.4823	0.938146	0.936879	0.000355606	0.0158219	0.0277297	0.0283167	3.44903	1.80074	0.969751	0.968981	0.00366804
hsa-miR-1255b-5p	113	0.0948418	0.12963	0.224472	0.208848	0.42251	0.57749	0.474453	74.4251	78.4251	78.632	78.584	1.05218	4	61	0.387956	4.15853	4.20144	3.97054	3.95808	4.08893	0.759985	1.15277	-0.960764	-1.07489	0.122902	0.0695992	0.112509	-0.118387	-0.130854	1.04943	1.08111	-1.08552	-1.09494	0.53493	0.806551	-0.65735	-0.873363	0.594643	0.423059	0.513429	0.38589	0.225744	0.373599	0.28952	0.413536	0.89866	0.772746	0.831363
hsa-miR-125a-5p	114	0.204839	0.390826	0.595665	1.29243	0.343882	0.656118	0.742427	139.807	143.807	144.014	143.966	30.0261	4	61	8.17747e-14	5.01095	4.22951	6.88876	5.8051	4.1065	-0.169875	-0.842989	1.44763	0.514187	-0.948949	0.90445	0.123011	2.78225	1.6986	1.87183	1.08901	6.87927	3.24586	4.00642	0.508861	8.90406	6.53465	0.000170102	0.612686	1.24519e-12	1.45178e-08	3.76929	0.212762	11.9048	7.8381	0.00195322	0.912254	7.15055e-10
hsa-miR-125b-2-3p	115	0.00259436	0.204701	0.207295	0.199342	0.0125153	0.987485	0.0464596	89.5494	93.5494	93.7563	93.7083	0.419155	4	61	0.794197	2.9747	3.08994	3.12503	2.91538	2.95157	-0.401869	0.862556	1.2476	-1.05272	-0.655571	0.0231227	0.138364	0.173458	-0.0361966	1.01616	1.10066	1.12776	-1.02541	0.143218	0.815652	0.775719	-0.194948	0.88659	0.417873	0.440912	0.846082	0.0522772	0.378956	0.355648	0.0725877	0.945978	0.772746	0.772746
hsa-miR-125b-5p	116	0.0481727	0.327935	0.376108	1.12622	0.128082	0.871918	0.743594	123.038	127.038	127.245	127.197	37.2996	4	61	9.27726e-16	5.72496	4.75313	7.06074	6.63834	4.57411	-0.0228909	-0.902359	1.18593	0.803683	-1.06437	1.15085	0.179021	2.48663	2.06423	2.22045	1.13212	5.60466	4.18211	5.58917	0.817641	8.72524	8.71132	5.65878e-07	0.416744	2.51166e-12	2.65284e-12	6.24728	0.38013	11.6	11.5763	1.50735e-05	0.772746	8.03809e-10
hsa-miR-1260a	117	0.030857	0.143261	0.174118	0.188432	0.177219	0.822781	0.338081	74.0863	78.0863	78.2932	78.2452	3.33873	4	61	0.0154548	3.58055	3.32145	3.20638	3.08658	3.3926	1.40338	0.0210128	-0.592906	-1.23209	0.400606	0.187954	-0.0711486	-0.186218	-0.306023	1.13915	-1.05055	-1.13778	-1.2363	1.37898	-0.489716	-0.987133	-1.95066	0.172936	0.626091	0.327477	0.0556958	0.762114	0.203362	0.484819	1.25418	0.60014	0.926523	0.772746
hsa-miR-1260b	118	0.142265	0.362042	0.504307	0.697191	0.2821	0.7179	0.554942	133.565	137.565	137.772	137.724	11.203	4	61	7.04315e-07	4.64508	4.16438	3.2468	3.47318	4.54058	1.00435	0.239326	-1.221	-0.860718	0.838049	0.104492	-0.376203	-1.29379	-1.06741	1.07512	-1.29792	-2.45171	-2.09566	0.481283	-1.62023	-4.30541	-4.27026	0.632038	0.110342	6.14725e-05	6.94086e-05	0.199257	0.957259	4.21132	4.15859	0.930212	0.444301	0.000837131
hsa-miR-1262	119	0.263658	0.310984	0.574643	0.646764	0.458821	0.541179	0.593788	128.692	132.692	132.899	132.851	9.04592	4	61	8.37213e-06	4.44919	3.76414	4.0451	4.20551	3.3039	1.12566	-0.430231	0.207882	0.572212	-1.47552	1.14529	0.460237	0.741197	0.90161	2.21191	1.37577	1.67156	1.86815	5.68165	2.1286	2.65635	3.88395	3.9771e-07	0.0373341	0.0100667	0.000255453	6.40043	1.42789	1.99711	3.59269	1.09551e-05	0.190619	0.0669966
hsa-miR-126-3p	120	0.0349871	0.0698845	0.104872	0.104583	0.333618	0.666382	0.430317	34.5433	38.5433	38.7502	38.7021	1.85449	4	61	0.130027	12.7525	12.7269	12.689	12.5043	12.6208	0.941864	0.685108	0.304715	-1.55106	-0.380625	0.131671	0.106108	0.0682345	-0.116532	1.09556	1.07632	1.04843	-1.08413	1.37947	1.03832	0.516473	-1.06032	0.172786	0.303218	0.607391	0.293181	0.762492	0.518245	0.216531	0.532864	0.60014	0.772746	0.909961
hsa-miR-126-5p	121	0.0546502	0.107278	0.161928	0.18051	0.337497	0.662503	0.4935	60.7837	64.7837	64.9905	64.9425	6.41059	4	61	0.000225395	9.25288	9.15578	9.77937	9.37921	8.9998	-0.205107	-0.534168	1.57906	0.222972	-1.06276	0.253085	0.155982	0.779577	0.379407	1.19175	1.11418	1.71663	1.30081	2.13996	1.23182	4.76233	2.78618	0.0363658	0.222745	1.22094e-05	0.00709765	1.43931	0.652192	4.91331	2.14889	0.187555	0.708575	0.000221067
hsa-miR-1268a	122	0.00030746	0.197515	0.197822	0.190464	0.00155422	0.998446	0.0281669	86.7815	90.7815	90.9884	90.9404	0.40069	4	61	0.807401	2.98822	3.08577	3.12162	2.91342	2.95471	-0.278491	0.829193	1.23626	-1.12794	-0.65902	0.0335119	0.131062	0.16691	-0.0412961	1.0235	1.0951	1.12265	-1.02904	0.211609	0.789348	0.760807	-0.226762	0.833118	0.432966	0.449704	0.821367	0.0792936	0.363546	0.347074	0.0854628	0.945978	0.772746	0.773256
hsa-miR-1271-5p	123	0.0100773	0.163456	0.173534	0.177294	0.0580711	0.941929	0.167421	77.9459	81.9459	82.1528	82.1048	1.43033	4	61	0.234767	3.13059	3.3194	3.12126	3.20695	3.43959	-0.83484	0.560498	-0.903814	-0.270566	1.44872	-0.309	-0.12019	-0.318333	-0.232645	-1.23885	-1.08688	-1.24689	-1.17499	-2.13301	-0.784607	-1.58735	-1.39599	0.0369555	0.435721	0.117604	0.167777	1.43232	0.360792	0.929577	0.775267	0.189788	0.772746	0.462031
hsa-miR-1273c	124	0.00603935	0.218941	0.22498	0.214145	0.0268439	0.973156	0.0603471	94.3691	98.3691	98.576	98.528	0.310071	4	61	0.870172	2.9749	3.0946	3.13181	3.0028	2.94745	-0.699141	0.811081	1.2806	-0.347092	-1.04544	0.0274483	0.14715	0.184364	0.0553521	1.01921	1.10738	1.13632	1.03911	0.164134	0.835465	0.796161	0.287781	0.870168	0.406716	0.429026	0.77449	0.0603968	0.390709	0.367516	0.110984	0.945978	0.772746	0.772746
hsa-miR-127-3p	125	0.15381	0.193311	0.347121	0.55676	0.443101	0.556899	0.706399	99.305	103.305	103.512	103.464	19.6809	4	61	1.91221e-10	5.7759	5.80259	4.6634	4.78206	5.97199	0.604193	0.647001	-1.18011	-0.989784	0.9187	-0.196093	-0.169403	-1.30859	-1.18993	-1.14559	-1.12459	-2.477	-2.28141	-1.23399	-0.994043	-5.94909	-6.50239	0.221941	0.324129	1.42312e-07	1.64783e-08	0.653763	0.489282	6.84676	7.78309	0.707374	0.772746	4.42846e-06
hsa-miR-127-5p	126	0.00259436	0.204701	0.207295	0.199342	0.0125153	0.987485	0.0464596	89.5494	93.5494	93.7563	93.7083	0.419155	4	61	0.794197	2.9747	3.08994	3.12503	2.91538	2.95157	-0.401869	0.862556	1.2476	-1.05272	-0.655571	0.0231227	0.138364	0.173458	-0.0361966	1.01616	1.10066	1.12776	-1.02541	0.143218	0.815652	0.775719	-0.194948	0.88659	0.417873	0.440912	0.846082	0.0522772	0.378956	0.355648	0.0725877	0.945978	0.772746	0.772746
hsa-miR-1277-3p	127	0	0.177121	0.177121	0.172068	0	1	0.0339791	80.0473	82.0473	82.1151	82.1267	0.536407	4	61	0.709487	3.03826	3.0852	3.16496	2.91314	2.95514	0.0687054	0.534731	1.32661	-1.1735	-0.756542	0.0831209	0.13006	0.20982	-0.0419972	1.05931	1.09434	1.15654	-1.02954	0.554376	0.82764	1.01014	-0.243583	0.581348	0.411101	0.316419	0.808371	0.235563	0.386052	0.499738	0.0923892	0.888517	0.772746	0.772746
hsa-miR-1277-5p	128	0.119403	0.174961	0.294363	0.328614	0.40563	0.59437	0.548684	92.3046	96.3046	96.5115	96.4635	6.90956	4	61	0.000117957	4.31629	4.18663	4.7056	4.55289	3.80448	0.00893126	-0.36295	1.12552	0.687514	-1.45901	0.511816	0.382155	0.901127	0.748411	1.42584	1.30329	1.86752	1.67994	3.3865	2.35901	4.30752	4.30031	0.00124368	0.0215424	6.1026e-05	6.25678e-05	2.90529	1.66671	4.21449	4.20365	0.0111655	0.123449	0.000835746
hsa-miR-128-1-5p	129	0.00259436	0.204701	0.207295	0.199342	0.0125153	0.987485	0.0464596	89.5494	93.5494	93.7563	93.7083	0.419155	4	61	0.794197	2.9747	3.08994	3.12503	2.91538	2.95157	-0.401869	0.862556	1.2476	-1.05272	-0.655571	0.0231227	0.138364	0.173458	-0.0361966	1.01616	1.10066	1.12776	-1.02541	0.143218	0.815652	0.775719	-0.194948	0.88659	0.417873	0.440912	0.846082	0.0522772	0.378956	0.355648	0.0725877	0.945978	0.772746	0.772746
hsa-miR-128-3p	130	0.00487415	0.0300993	0.0349735	0.0670926	0.139367	0.860633	0.606116	-22.2738	-18.2738	-18.0669	-18.1149	17.9979	4	61	8.30286e-10	10.3395	9.94287	9.86243	9.91525	10.0264	1.6992	-0.392418	-0.816625	-0.538092	0.0479319	0.313121	-0.0835009	-0.163941	-0.111124	1.24239	-1.05959	-1.12034	-1.08007	5.01747	-1.25753	-1.89803	-1.54725	4.81673e-06	0.213355	0.0624266	0.126977	5.31725	0.670898	1.20463	0.896276	0.000103325	0.695124	0.286053
hsa-miR-1285-3p	131	0	0.165706	0.165706	0.158227	0	1	0.0171843	75.9834	77.9834	78.0512	78.0628	0.266642	4	61	0.898294	2.98198	3.0852	3.12112	3.00405	2.98426	-0.836078	0.78183	1.34488	-0.490168	-0.800465	-0.00227195	0.100944	0.136864	0.0197956	-1.00158	1.07247	1.09951	1.01382	-0.0156661	0.664116	0.681227	0.118703	0.987552	0.509119	0.498306	0.9059	0.00544006	0.293181	0.302504	0.0429196	0.996546	0.827147	0.81876
hsa-miR-1292-5p	132	0.00711393	0.199058	0.206172	0.200621	0.0345049	0.965495	0.0925089	88.9244	92.9244	93.1313	93.0833	0.696298	4	61	0.597438	2.98189	3.09675	3.28812	2.99989	2.97551	-0.654712	0.214253	1.66202	-0.518555	-0.70301	0.00638411	0.121246	0.312617	0.0243817	1.00443	1.08767	1.24196	1.01704	0.0400079	0.720634	1.41493	0.13284	0.968218	0.473887	0.162174	0.894757	0.0140271	0.324325	0.790019	0.048295	0.984463	0.796017	0.578408
hsa-miR-1294	133	0	0.189309	0.189309	0.182074	0	1	0.0242458	84.1065	86.1065	86.1743	86.1859	0.378936	4	61	0.822824	2.99403	3.0852	3.12112	2.92564	2.95514	-0.264364	0.821603	1.24949	-1.07905	-0.72768	0.0388947	0.13006	0.165981	-0.0294968	1.02733	1.09434	1.12193	-1.02066	0.25092	0.800556	0.772934	-0.165483	0.802719	0.426496	0.442546	0.869111	0.0954363	0.370085	0.354041	0.0609246	0.945978	0.772746	0.772746
hsa-miR-1296-5p	134	0.000193098	0.117382	0.117575	0.122455	0.00164234	0.998358	0.101761	55.0429	59.0429	59.2498	59.2018	1.68403	4	61	0.165264	4.02645	3.82576	3.84797	3.76642	4.0211	1.08283	-0.602983	-0.416377	-1.10143	1.03796	0.00534173	-0.195347	-0.173132	-0.254685	1.00371	-1.145	-1.1275	-1.19308	0.0437533	-1.52611	-1.02368	-1.81409	0.965244	0.132151	0.310029	0.0745819	0.0153629	0.878928	0.508598	1.12737	0.982748	0.501307	0.772746
hsa-miR-1301-3p	135	0	0.126455	0.126455	0.128029	0	1	0.0730759	59.4932	61.4932	61.561	61.5727	1.20226	4	61	0.319073	3.21384	3.0852	3.12112	2.99732	2.96572	1.38115	0.0861783	0.447789	-0.798465	-1.11666	0.248119	0.119483	0.155403	0.0316074	1.18766	1.08635	1.11373	1.02215	1.95849	0.899852	0.885449	0.216962	0.054749	0.371738	0.379392	0.828962	1.26162	0.429764	0.420912	0.0814654	0.259492	0.772746	0.772746
hsa-miR-1303	136	0.1746	0.176684	0.351284	0.438078	0.497033	0.502967	0.659988	95.1453	99.1453	99.3522	99.3041	14.7195	4	61	1.7971e-08	3.78153	3.96781	4.872	4.73054	3.92522	-0.937417	-0.568932	1.21967	0.939854	-0.653177	-0.143691	0.0425887	0.94678	0.805324	-1.10473	1.02996	1.92757	1.74754	-0.945477	0.261147	4.50043	4.60119	0.348146	0.794859	3.10956e-05	2.17571e-05	0.458239	0.0997098	4.5073	4.6624	0.772746	0.945978	0.000472831
hsa-miR-1304-3p	137	0.877259	0.0810278	0.958287	0.877936	0.915445	0.0845549	0.92321	63.582	67.582	67.7889	67.7408	17.1519	4	61	1.78439e-09	5.6604	5.80267	4.73074	5.39908	5.67695	0.47995	0.81072	-1.68147	-0.127614	0.518414	-0.0165442	0.125726	-0.946207	-0.277868	-1.01153	1.09106	-1.9268	-1.2124	-0.160498	1.13364	-6.63034	-2.34011	0.873019	0.261381	9.96614e-09	0.0225659	0.0589762	0.582726	8.00147	1.64655	0.945978	0.772746	5.13998e-07
hsa-miR-1304-5p	138	0.562551	0.0697956	0.632347	0.555519	0.889624	0.110376	0.895414	52.4417	56.4417	56.6486	56.6006	5.53482	4	61	0.000722028	4.33511	4.27968	3.81861	4.07318	4.28894	0.816887	0.559605	-1.58031	-0.398793	0.602608	0.0461689	-0.00926548	-0.470333	-0.215763	1.03252	-1.00644	-1.38543	-1.16132	0.482617	-0.090031	-3.55129	-1.95798	0.631095	0.928558	0.000745749	0.0548101	0.199905	0.0321912	3.12741	1.26114	0.929402	0.966019	0.007089
hsa-miR-1306-3p	139	0	0.138522	0.138522	0.132977	0	1	0.0224089	65.0531	67.0531	67.1209	67.1325	0.349569	4	61	0.843338	3.06071	3.09379	3.12112	2.96632	2.98426	0.228649	0.717816	1.1218	-1.16671	-0.901561	0.0764496	0.109538	0.136864	-0.017935	1.05442	1.07888	1.09951	-1.01251	0.576562	0.788202	0.745078	-0.117627	0.566357	0.433631	0.459086	0.90675	0.24691	0.36288	0.338106	0.0425124	0.87722	0.772746	0.779289
hsa-miR-1306-5p	140	0.0246368	0.25338	0.278017	0.314551	0.0886161	0.911384	0.281802	105.9	109.9	110.107	110.059	3.64818	4	61	0.00993127	3.67781	3.36747	3.15078	2.99081	3.40338	1.37403	0.188753	-0.63886	-1.24983	0.325906	0.274427	-0.0359103	-0.252602	-0.412569	1.20951	-1.0252	-1.19135	-1.33105	1.51879	-0.187413	-1.00999	-1.98447	0.133983	0.851959	0.316492	0.0517067	0.872951	0.0695813	0.499638	1.28645	0.505092	0.945978	0.772746
hsa-miR-1307-3p	141	0.515913	0.11235	0.628263	0.614518	0.821174	0.178826	0.847583	77.6242	81.6242	81.8311	81.7831	7.65072	4	61	4.60406e-05	7.69778	7.52013	6.95314	7.24942	7.64828	0.914133	0.34238	-1.48244	-0.5289	0.754829	0.0494974	-0.128152	-0.695143	-0.398868	1.0349	-1.09289	-1.61904	-1.31847	0.407886	-0.981929	-4.13776	-2.85348	0.684786	0.330013	0.000109239	0.00589805	0.164445	0.481468	3.96162	2.22929	0.945978	0.772746	0.00132398
hsa-miR-1307-5p	142	0.155518	0.19086	0.346378	0.371879	0.448984	0.551016	0.566164	98.6703	102.67	102.877	102.829	7.26111	4	61	7.52611e-05	4.32759	4.3683	4.9715	4.83752	4.05213	-0.481398	-0.374765	1.2049	0.854036	-1.20277	0.275457	0.316175	0.919371	0.785395	1.21038	1.24503	1.89129	1.72356	1.74444	1.86696	4.20618	4.31907	0.0861193	0.0667154	8.65027e-05	5.86324e-05	1.0649	1.17577	4.06297	4.23186	0.369475	0.301151	0.00108084
hsa-miR-130a-3p	143	0.0294537	0.247523	0.276977	0.321023	0.10634	0.89366	0.316693	105.124	109.124	109.331	109.283	4.36845	4	61	0.00358987	3.51313	3.69769	4.36804	3.94944	3.53582	-0.842005	-0.323487	1.55992	0.383841	-0.778268	-0.0226858	0.16187	0.832227	0.413628	-1.01585	1.11874	1.78043	1.33203	-0.126924	0.85288	3.36401	2.01112	0.899418	0.397062	0.00133219	0.0487379	0.0460383	0.401141	2.87543	1.31213	0.951457	0.772746	0.0117855
hsa-miR-130b-3p	144	0.0813529	0.175427	0.25678	0.25403	0.31682	0.68318	0.410308	90.2621	94.2621	94.469	94.421	1.23031	4	61	0.307434	3.87508	3.73729	4.16615	3.93727	3.81809	-0.194897	-1.04211	1.59483	0.18749	-0.545318	0.0569901	-0.0807951	0.348061	0.119179	1.04029	-1.0576	1.27285	1.08612	0.376922	-0.499277	1.66315	0.684589	0.70754	0.61938	0.101412	0.496196	0.150249	0.208043	0.993909	0.304347	0.945978	0.919896	0.418624
hsa-miR-130b-5p	145	0	0.197131	0.197131	0.189743	0	1	0.0249945	86.5764	88.5764	88.6442	88.6559	0.390937	4	61	0.814335	3.00141	3.0852	3.12112	2.91314	2.95514	-0.158366	0.803817	1.21631	-1.17202	-0.689743	0.0462726	0.13006	0.165981	-0.0419972	1.03259	1.09434	1.12193	-1.02954	0.292534	0.784511	0.757443	-0.23089	0.770871	0.435776	0.451701	0.818173	0.113018	0.360736	0.345149	0.0871548	0.945978	0.772746	0.774344
hsa-miR-132-3p	146	0	0.134972	0.134972	0.136471	0	1	0.0718487	63.4695	65.4695	65.5373	65.549	1.18051	4	61	0.328361	3.47148	3.21951	3.34336	3.42242	3.31316	1.19993	-1.37335	-0.108535	0.698888	-0.416936	0.158317	-0.0936479	0.0301973	0.109257	1.11598	-1.06706	1.02115	1.07867	1.20958	-0.682667	0.166539	0.725918	0.231107	0.497402	0.868283	0.470665	0.636187	0.303293	0.0613385	0.327288	0.724713	0.81798	0.945978
hsa-miR-132-5p	147	0.00259436	0.204701	0.207295	0.199342	0.0125153	0.987485	0.0464596	89.5494	93.5494	93.7563	93.7083	0.419155	4	61	0.794197	2.9747	3.08994	3.12503	2.91538	2.95157	-0.401869	0.862556	1.2476	-1.05272	-0.655571	0.0231227	0.138364	0.173458	-0.0361966	1.01616	1.10066	1.12776	-1.02541	0.143218	0.815652	0.775719	-0.194948	0.88659	0.417873	0.440912	0.846082	0.0522772	0.378956	0.355648	0.0725877	0.945978	0.772746	0.772746
hsa-miR-133a-3p	148	0	0.346927	0.346927	0.380416	0	1	0.144155	121.056	123.056	123.124	123.136	2.56865	4	61	0.0467927	3.05091	3.13305	3.822	2.99979	2.95514	-0.39434	-0.16506	1.75813	-0.537049	-0.661678	0.0957699	0.177906	0.866858	0.0446464	1.06864	1.13124	1.82369	1.03143	0.456394	0.808918	2.98195	0.185025	0.649728	0.421706	0.00411187	0.853823	0.187269	0.37499	2.38596	0.0686319	0.94348	0.772746	0.030954
hsa-miR-134-5p	149	0.189872	0.195461	0.385332	0.399362	0.492748	0.507252	0.587292	101.2	105.2	105.407	105.359	3.914	4	61	0.00680762	4.39569	4.6238	4.09552	4.0084	4.49725	0.27199	1.13908	-0.868989	-1.20014	0.658056	-0.101565	0.126546	-0.401728	-0.488846	-1.07294	1.09168	-1.32109	-1.40332	-0.635394	0.737802	-1.8156	-2.65555	0.527548	0.463463	0.0743481	0.0100882	0.277738	0.333985	1.12873	1.99619	0.84501	0.783974	0.329903
hsa-miR-135a-5p	150	0.00244354	0.201253	0.203697	0.195878	0.011996	0.988004	0.045554	88.4862	92.4862	92.6931	92.645	0.416921	4	61	0.795799	2.98159	3.08972	3.12483	2.91535	2.95168	-0.343482	0.852932	1.24138	-1.07639	-0.674439	0.0299122	0.138046	0.173154	-0.0363293	1.02095	1.10041	1.12752	-1.0255	0.186863	0.820844	0.781008	-0.197344	0.852388	0.414931	0.437818	0.844214	0.0693627	0.382024	0.358706	0.0735474	0.945978	0.772746	0.772746
hsa-miR-136-3p	151	0.00889191	0.198295	0.207187	0.20194	0.0429174	0.957083	0.106274	89.0742	93.0742	93.2811	93.233	0.768464	4	61	0.549911	2.99274	3.14165	3.19828	2.92158	2.94523	-0.383072	0.826549	1.28653	-0.961026	-0.768984	0.0475101	0.196428	0.253057	-0.0236425	1.03348	1.14586	1.19173	-1.01652	0.298095	1.16759	1.14682	-0.128961	0.766644	0.247518	0.255933	0.897813	0.115406	0.606394	0.591874	0.0468141	0.945978	0.755189	0.772578
hsa-miR-136-5p	152	0.00259436	0.204701	0.207295	0.199342	0.0125153	0.987485	0.0464596	89.5494	93.5494	93.7563	93.7083	0.419155	4	61	0.794197	2.9747	3.08994	3.12503	2.91538	2.95157	-0.401869	0.862556	1.2476	-1.05272	-0.655571	0.0231227	0.138364	0.173458	-0.0361966	1.01616	1.10066	1.12776	-1.02541	0.143218	0.815652	0.775719	-0.194948	0.88659	0.417873	0.440912	0.846082	0.0522772	0.378956	0.355648	0.0725877	0.945978	0.772746	0.772746
hsa-miR-138-2-3p	153	0	0.139025	0.139025	0.134982	0	1	0.0334305	65.2741	67.2741	67.3419	67.3535	0.527448	4	61	0.715947	3.12455	3.13035	3.12112	2.95727	3.02637	0.681761	0.756998	0.637351	-1.48573	-0.590381	0.0981772	0.103984	0.0947498	-0.0690982	1.07042	1.07474	1.06788	-1.04906	0.739085	0.746881	0.514877	-0.452359	0.46269	0.458005	0.6085	0.652615	0.33471	0.33913	0.215739	0.185343	0.783212	0.777998	0.910496
hsa-miR-138-5p	154	0.890373	0.130729	1.0211	0.966186	0.871973	0.128027	0.887326	89.5637	93.5637	93.7706	93.7226	2.16333	4	61	0.0837703	3.93663	4.16831	3.9638	4.04814	4.28683	-0.984828	0.598428	-0.799194	-0.222823	1.40842	-0.350201	-0.118525	-0.323037	-0.238697	-1.27474	-1.08562	-1.25096	-1.17993	-2.67496	-0.841609	-1.7823	-1.58281	0.00958102	0.403294	0.0796766	0.118636	2.01859	0.394378	1.09867	0.925783	0.0645122	0.772746	0.346743
hsa-miR-139-3p	155	0.00223476	0.19369	0.195925	0.188442	0.0114062	0.988594	0.0447303	86.1187	90.1187	90.3256	90.2776	0.41736	4	61	0.795484	2.999	3.08943	3.12453	2.91538	2.95175	-0.191108	0.824431	1.21873	-1.13027	-0.721788	0.0472526	0.137678	0.172787	-0.0363717	1.0333	1.10013	1.12723	-1.02553	0.300919	0.834639	0.794471	-0.201411	0.7645	0.407178	0.430001	0.841048	0.116623	0.390216	0.36653	0.0751794	0.945978	0.772746	0.772746
hsa-miR-139-5p	156	0.00676794	0.19549	0.202258	0.19624	0.0334619	0.966538	0.0882975	87.7726	91.7726	91.9795	91.9315	0.629391	4	61	0.643386	3.06929	3.13181	3.17456	2.93358	2.94644	0.167751	0.745399	1.14043	-1.0862	-0.967377	0.122853	0.185371	0.228125	-0.0128604	1.08889	1.13711	1.17131	-1.00895	0.776962	1.11204	1.04198	-0.070712	0.440184	0.270485	0.301534	0.943858	0.356366	0.567857	0.520664	0.0250932	0.772746	0.772746	0.772746
hsa-miR-1-3p	157	0.0466752	0.778754	0.82543	0.994137	0.0565466	0.943453	0.292068	173.112	177.112	177.319	177.271	4.80102	4	61	0.00196698	4.06739	3.52454	4.95104	4.49687	3.49425	-0.0627154	-0.926275	1.34296	0.620485	-0.974449	0.573143	0.0302839	1.45679	1.00262	1.48776	1.02121	2.74497	2.00364	1.81277	0.0905968	3.32835	2.75661	0.0747879	0.92811	0.00148482	0.00769256	1.12617	0.0324006	2.82833	2.11393	0.330211	0.966019	0.0128545
hsa-miR-140-3p	158	0	0.0737908	0.0737908	0.12657	0	1	0.452873	26.6356	28.6356	28.7034	28.715	12.6229	4	61	1.5217e-07	12.1683	12.5224	12.8433	12.7682	12.5444	-1.52044	-0.177758	1.03877	0.754092	-0.0946625	-0.376073	-0.0219178	0.298962	0.223873	-1.2978	-1.01531	1.23026	1.16786	-3.88598	-0.216087	2.2299	2.0117	0.000253747	0.829641	0.029445	0.0486746	3.5956	0.08111	1.53099	1.3127	0.00275822	0.945978	0.15756
hsa-miR-140-5p	159	0.0360378	0.130078	0.166115	0.17499	0.216944	0.783056	0.357334	69.3578	73.3578	73.5647	73.5167	3.30573	4	61	0.0162034	8.24257	7.97692	7.77185	7.86907	7.91678	1.62061	0.121267	-1.03618	-0.487486	-0.218206	0.325794	0.0601465	-0.144926	-0.0477101	1.25335	1.04257	-1.10567	-1.03362	2.50622	0.433426	-0.805504	-0.318829	0.0148853	0.666234	0.423658	0.750945	1.82724	0.176373	0.372985	0.124392	0.0922815	0.945978	0.772746
hsa-miR-141-3p	160	0	0.236714	0.236714	0.3601	0	1	0.383097	97.7383	99.7383	99.8061	99.8178	9.47026	4	61	5.06854e-06	3.1505	3.17813	4.40637	3.21117	3.02642	-0.428146	-0.379667	1.77537	-0.321697	-0.645856	0.124081	0.151712	1.37995	0.184751	1.08981	1.11089	2.6026	1.13662	0.715854	0.835104	5.74675	0.92691	0.476813	0.406918	3.10007e-07	0.357626	0.321652	0.390493	6.50863	0.446571	0.799857	0.772746	8.63742e-06
hsa-miR-141-5p	161	0.00305309	0.1749	0.177953	0.170701	0.0171567	0.982843	0.0519313	80.1902	84.1902	84.3971	84.349	0.380656	4	61	0.82161	2.98218	3.09046	3.12569	2.92813	3.019	-0.586459	0.767253	1.20757	-1.26224	-0.126127	-0.0368214	0.0714603	0.106681	-0.0908762	-1.02585	1.05078	1.07675	-1.06502	-0.246599	0.455116	0.515897	-0.529198	0.806046	0.650642	0.607792	0.598589	0.09364	0.186658	0.216245	0.222872	0.945978	0.943734	0.909998
hsa-miR-142-3p	162	0.0287026	0.152164	0.180867	0.180838	0.158695	0.841305	0.264588	77.1937	81.1937	81.4006	81.3526	1.72435	4	61	0.156189	14.2274	13.9829	14.1078	13.9712	13.8999	1.46137	-0.423353	0.539146	-0.51402	-1.06314	0.327441	0.0829838	0.207825	0.071224	1.25479	1.05921	1.15495	1.05061	2.33221	0.554954	1.06949	0.440765	0.0230067	0.580955	0.289062	0.660941	1.63815	0.235857	0.53901	0.179837	0.129712	0.888477	0.772746
hsa-miR-142-5p	163	0.0162179	0.180038	0.196256	0.213478	0.0826361	0.917364	0.246388	84.8275	88.8275	89.0344	88.9864	2.95939	4	61	0.0266526	13.2416	12.8449	12.9479	13.169	12.8353	1.24757	-0.868725	-0.319304	0.860493	-0.920039	0.406312	0.00961856	0.112606	0.333755	1.32529	1.00669	1.08118	1.26029	2.6685	0.0595998	0.534282	1.90514	0.00974695	0.952669	0.595089	0.0614786	2.01113	0.0210579	0.225418	1.21128	0.0652669	0.975356	0.89866
hsa-miR-143-3p	164	0.435703	0.701466	1.13717	2.26407	0.383147	0.616853	0.736941	176.458	180.458	180.665	180.617	31.6287	4	61	2.87724e-14	3.80886	3.51605	6.77699	5.8673	3.32708	-0.544718	-0.732277	1.35651	0.77381	-0.853323	0.481783	0.188973	3.44991	2.54022	1.39647	1.13995	10.9276	5.81679	1.59236	0.58289	8.23773	7.29117	0.116473	0.562116	1.7167e-11	7.3135e-10	0.933776	0.250174	10.7653	9.13587	0.459072	0.87478	2.63635e-09
hsa-miR-144-3p	165	0.120843	0.402208	0.523051	0.712808	0.231034	0.768966	0.513201	138.611	142.611	142.818	142.77	10.2611	4	61	2.02904e-06	10.3442	9.63406	10.6696	10.5382	9.28512	0.414226	-0.762463	0.95332	0.73553	-1.34061	1.05911	0.348937	1.38448	1.25303	2.08365	1.27362	2.61077	2.38342	4.63209	1.42894	4.37485	4.76049	1.94873e-05	0.158122	4.83005e-05	1.22906e-05	4.71025	0.801006	4.31605	4.91043	0.000321341	0.569523	0.000692783
hsa-miR-144-5p	166	0.00626995	0.165801	0.172071	0.235377	0.0364382	0.963562	0.356487	77.8627	81.8627	82.0696	82.0216	7.36216	4	61	6.62107e-05	11.4734	11.4876	12.3628	11.847	11.4622	-0.648138	-0.61185	1.62867	0.308125	-0.676804	0.0111981	0.0253738	0.900614	0.384755	1.00779	1.01774	1.86686	1.30564	0.0768797	0.165173	4.46572	2.2965	0.938971	0.869354	3.51395e-05	0.0250957	0.0273479	0.0608032	4.4542	1.6004	0.969776	0.945978	0.000513122
hsa-miR-145-5p	167	0	0.385773	0.385773	0.393705	0	1	0.0804462	127.531	129.531	129.598	129.61	1.33413	4	61	0.267532	2.97511	3.0852	3.5897	3.16455	2.95514	-0.693185	-0.266451	1.68908	0.0411434	-0.770589	0.0199691	0.13006	0.634559	0.209415	1.01394	1.09434	1.55246	1.15622	0.090245	0.560804	2.07003	0.823009	0.928388	0.576986	0.0426908	0.413709	0.0322704	0.238835	1.36967	0.383305	0.966019	0.886882	0.21514
hsa-miR-146a-5p	168	0	0.374958	0.374958	0.974254	0	1	0.638817	125.796	127.796	127.864	127.875	26.9724	4	61	6.63871e-13	8.8921	9.0372	11.4587	10.2386	9.26236	-0.822667	-0.687891	1.5613	0.428005	-0.478743	-0.370269	-0.225169	2.19631	0.976206	-1.29259	-1.16891	4.58305	1.96729	-1.69729	-0.984803	7.26729	3.89146	0.0947395	0.328611	8.03952e-10	0.000249207	1.02347	0.483318	9.09477	3.60344	0.397316	0.772746	5.56794e-08
hsa-miR-146b-5p	169	0.353486	0.199165	0.552651	0.524846	0.639619	0.360381	0.682012	106.187	110.187	110.394	110.346	3.8837	4	61	0.00710627	5.86386	6.1674	6.64374	6.17342	6.24029	-1.26768	-0.18034	1.52602	-0.158768	0.0807653	-0.376427	-0.0728894	0.403453	-0.0668675	-1.29812	-1.05182	1.32267	-1.04744	-2.3312	-0.420152	1.8049	-0.359539	0.0230634	0.675851	0.076027	0.720433	1.63708	0.170149	1.11903	0.142406	0.129712	0.945978	0.333867
hsa-miR-147b	170	0	0.191634	0.191634	0.184593	0	1	0.0257465	84.851	86.851	86.9188	86.9305	0.40301	4	61	0.805748	2.99938	3.0852	3.12112	2.91314	2.95514	-0.176862	0.807695	1.21979	-1.16621	-0.684406	0.0442405	0.13006	0.165981	-0.0419972	1.03114	1.09434	1.12193	-1.02954	0.28367	0.795685	0.768231	-0.234178	0.777624	0.429301	0.445314	0.815631	0.109231	0.367238	0.351334	0.0885064	0.945978	0.772746	0.772746
hsa-miR-148a-3p	171	0.0818977	0.0725258	0.154423	0.176427	0.530345	0.469655	0.654003	41.6629	45.6629	45.8698	45.8218	10.8806	4	61	1.00789e-06	11.6374	11.3326	11.6046	11.3557	11.0287	0.998063	-0.240627	0.86461	-0.146604	-1.47544	0.608709	0.303877	0.575867	0.327016	1.52489	1.23446	1.49057	1.25442	6.25024	2.90678	4.27158	2.91557	4.42013e-08	0.00508407	6.90938e-05	0.00496034	7.35457	2.29379	4.16056	2.30449	1.67412e-06	0.0372902	0.00091938
hsa-miR-148a-5p	172	0.00259436	0.204701	0.207295	0.199342	0.0125153	0.987485	0.0464596	89.5494	93.5494	93.7563	93.7083	0.419155	4	61	0.794197	2.9747	3.08994	3.12503	2.91538	2.95157	-0.401869	0.862556	1.2476	-1.05272	-0.655571	0.0231227	0.138364	0.173458	-0.0361966	1.01616	1.10066	1.12776	-1.02541	0.143218	0.815652	0.775719	-0.194948	0.88659	0.417873	0.440912	0.846082	0.0522772	0.378956	0.355648	0.0725877	0.945978	0.772746	0.772746
hsa-miR-148b-3p	173	0.0213607	0.0575319	0.0788926	0.0740399	0.270757	0.729243	0.333149	21.0627	25.0627	25.2696	25.2215	0.863009	4	61	0.491346	9.32497	9.20566	9.39031	9.28629	9.25467	0.465209	-1.23785	1.39784	-0.0868764	-0.53833	0.0703053	-0.0490063	0.135643	0.0316276	1.04994	-1.03455	1.09858	1.02216	0.812464	-0.529692	1.13253	0.317467	0.419685	0.598248	0.261844	0.751973	0.377076	0.223119	0.581957	0.123798	0.772746	0.901229	0.772746
hsa-miR-148b-5p	174	0.0136497	0.129741	0.143391	0.136241	0.095192	0.904808	0.152937	65.3154	69.3154	69.5223	69.4743	0.431341	4	61	0.78544	4.20412	4.16482	4.3032	4.20031	4.08537	0.159787	-0.340412	1.42096	0.11135	-1.35169	0.118748	0.07945	0.217831	0.114942	1.08579	1.05662	1.16298	1.08293	0.918126	0.578972	1.21678	0.77236	0.362169	0.56474	0.228374	0.442883	0.441089	0.248151	0.641353	0.353711	0.772746	0.875835	0.718796
hsa-miR-149-5p	175	0.00440613	0.205992	0.210399	0.200668	0.0209418	0.979058	0.0527345	90.3613	94.3613	94.5682	94.5202	0.31447	4	61	0.867235	2.97565	3.09183	3.12691	2.99316	2.94898	-0.66617	0.832076	1.28444	-0.440293	-1.01006	0.026666	0.142845	0.177923	0.0441813	1.01866	1.10408	1.13125	1.0311	0.164491	0.837408	0.792543	0.236965	0.869889	0.405632	0.431116	0.813478	0.0605362	0.391868	0.365406	0.0896544	0.945978	0.772746	0.772746
hsa-miR-150-3p	176	0	0.134862	0.134862	0.138791	0	1	0.0881058	63.4198	65.4198	65.4876	65.4992	1.47343	4	61	0.221312	3.21827	3.09379	3.12112	2.91314	2.99483	1.27488	0.217197	0.44939	-1.3178	-0.623671	0.223438	0.0989606	0.126287	-0.0816906	1.16751	1.071	1.09148	-1.05826	1.70782	0.721689	0.696762	-0.542987	0.0927552	0.473243	0.488599	0.589117	1.03266	0.324916	0.311048	0.229798	0.391705	0.795521	0.809999
hsa-miR-150-5p	177	0.0410792	0.133027	0.174107	0.283318	0.235943	0.764057	0.595213	71.2556	75.2556	75.4625	75.4144	15.6092	4	61	7.5693e-09	9.66631	9.12529	9.06638	8.60763	9.36319	1.2791	-0.103417	-0.253958	-1.42624	0.504518	0.303115	-0.237901	-0.296812	-0.755559	1.23381	-1.17928	-1.22843	-1.68829	2.30493	-1.69362	-1.6307	-4.99078	0.024588	0.0954389	0.108107	5.31338e-06	1.60928	1.02027	0.966146	5.27463	0.1367	0.399558	0.438947
hsa-miR-151a-3p	178	0.103213	0.0213341	0.124547	0.126756	0.828707	0.171293	0.85971	-23.3602	-19.3602	-19.1533	-19.2013	17.0601	4	61	1.94094e-09	8.31765	8.49296	7.99453	8.2084	8.47042	0.101696	0.95653	-1.47384	-0.431	0.846611	-0.152771	0.0225428	-0.475889	-0.262019	-1.1117	1.01575	-1.39078	-1.19916	-2.88893	0.396357	-6.50035	-4.30148	0.0053443	0.693225	1.66109e-08	6.23137e-05	2.27211	0.159126	7.77961	4.20542	0.0390198	0.945978	7.06399e-07
hsa-miR-151b-151a-5p	179	0.140794	0.118844	0.259638	0.280156	0.54227	0.45773	0.643151	72.0914	76.0914	76.2983	76.2503	8.56171	4	61	1.49826e-05	5.06643	4.77864	4.3609	4.4348	4.63781	1.45245	0.434727	-1.04262	-0.781243	-0.0633169	0.428614	0.140832	-0.276917	-0.203008	1.34594	1.10254	-1.2116	-1.1511	3.43782	1.0522	-1.60451	-1.41382	0.00106209	0.296859	0.113767	0.162499	2.97384	0.527449	0.943984	0.789148	0.00975193	0.772746	0.453571
hsa-miR-152-3p	180	0.0930966	0.276521	0.369617	0.692739	0.251873	0.748127	0.65662	116.325	120.325	120.532	120.484	21.6149	4	61	3.83793e-11	3.8325	3.65428	5.49131	4.75568	3.57076	-0.513281	-0.726809	1.47416	0.592801	-0.826874	0.261739	0.0835184	1.92055	1.18493	1.19892	1.0596	3.78568	2.27352	1.38008	0.412087	7.31648	5.42702	0.172599	0.68172	6.61521e-10	1.04612e-06	0.762962	0.166394	9.17946	5.98042	0.60014	0.945978	5.01102e-08
hsa-miR-1539	181	0.00259436	0.204701	0.207295	0.199342	0.0125153	0.987485	0.0464596	89.5494	93.5494	93.7563	93.7083	0.419155	4	61	0.794197	2.9747	3.08994	3.12503	2.91538	2.95157	-0.401869	0.862556	1.2476	-1.05272	-0.655571	0.0231227	0.138364	0.173458	-0.0361966	1.01616	1.10066	1.12776	-1.02541	0.143218	0.815652	0.775719	-0.194948	0.88659	0.417873	0.440912	0.846082	0.0522772	0.378956	0.355648	0.0725877	0.945978	0.772746	0.772746
hsa-miR-154-5p	182	0.0231277	0.186253	0.209381	0.202489	0.110458	0.889542	0.185896	87.9223	91.9223	92.1292	92.0811	0.918068	4	61	0.459323	3.00513	3.20706	3.15525	2.93211	2.98451	-0.437914	1.2731	0.834084	-1.0566	-0.612664	0.0206241	0.222558	0.170745	-0.0523935	1.0144	1.1668	1.12564	-1.03698	0.132998	1.35121	0.795512	-0.293614	0.894633	0.181619	0.429401	0.770049	0.0483551	0.740838	0.367137	0.113481	0.950018	0.622695	0.772746
hsa-miR-155-5p	183	0.198585	0.0511867	0.249772	0.256957	0.795066	0.204934	0.833826	28.5242	32.5242	32.7311	32.6831	21.523	4	61	4.13476e-11	8.97774	9.12844	8.50745	8.51198	9.18598	0.348988	0.804619	-1.07295	-1.05923	0.978573	-0.208232	-0.0575343	-0.678529	-0.673994	-1.15527	-1.04069	-1.60051	-1.59548	-2.54239	-0.653242	-5.98415	-7.14409	0.0135642	0.516055	1.24275e-07	1.30994e-09	1.86761	0.287304	6.90562	8.88275	0.0854499	0.833007	3.98264e-06
hsa-miR-15a-3p	184	0	0.17196	0.17196	0.165411	0	1	0.0243813	78.2434	80.2434	80.3112	80.3229	0.381106	4	61	0.821293	3.04263	3.09379	3.12112	2.94956	2.95514	0.129936	0.782603	1.13122	-1.0575	-0.986254	0.087494	0.138654	0.165981	-0.00558463	1.06252	1.10088	1.12193	-1.00388	0.592235	0.895471	0.810987	-0.0328732	0.555882	0.374056	0.420526	0.973883	0.255017	0.427064	0.376207	0.0114932	0.870451	0.772746	0.772746
hsa-miR-15a-5p	185	0.0091511	0.0447963	0.0539474	0.0859141	0.16963	0.83037	0.545353	2.94009	6.94009	7.14699	7.09898	14.2237	4	61	2.9403e-08	11.4694	11.4113	11.9768	11.778	11.3506	-0.476012	-0.692331	1.41345	0.673125	-0.918232	0.118765	0.0606689	0.626208	0.427382	1.0858	1.04295	1.5435	1.34479	1.55856	0.747163	5.93748	4.87286	0.124274	0.457836	1.48835e-07	8.17813e-06	0.905619	0.339291	6.8273	5.08735	0.48431	0.777998	4.50969e-06
hsa-miR-15b-3p	186	0.0729928	0.115535	0.188528	0.240895	0.387172	0.612828	0.592907	66.5381	70.5381	70.745	70.6969	12.1351	4	61	2.555e-07	8.11376	8.05566	9.03995	8.18228	7.90046	-0.322121	-0.451487	1.74021	-0.16954	-0.797065	0.213296	0.155198	1.13949	0.28182	1.15933	1.11357	2.20302	1.21573	1.73701	1.17944	6.70405	1.99308	0.0874321	0.242802	7.45548e-09	0.0507313	1.05833	0.614748	8.12752	1.29472	0.374444	0.746931	3.92871e-07
hsa-miR-15b-5p	187	0.00522437	0.0555048	0.0607292	0.0636977	0.0860273	0.913973	0.22236	13.1785	17.1785	17.3854	17.3374	1.87571	4	61	0.12618	13.0662	13.0776	12.8764	12.989	13.1707	0.274737	0.37818	-1.44974	-0.4269	1.22373	-0.104437	-0.0930528	-0.294217	-0.181652	-1.07507	-1.06662	-1.22622	-1.13418	-1.2351	-1.03796	-2.51375	-1.86712	0.22153	0.303386	0.0146014	0.0666917	0.654568	0.518004	1.83561	1.17593	0.707374	0.772746	0.0909865
hsa-miR-16-1-3p	188	0	0.193311	0.193311	0.204666	0	1	0.113606	85.3827	87.3827	87.4505	87.4622	1.95454	4	61	0.112833	3.80732	3.6761	4.10814	4.05284	3.73731	-0.357528	-1.03728	1.20071	0.914266	-0.720165	0.0700065	-0.0612189	0.370822	0.315524	1.04972	-1.04335	1.29309	1.24446	0.44693	-0.372898	1.70886	1.75173	0.656508	0.710517	0.0925602	0.0848466	0.18276	0.148425	1.03358	1.07137	0.945978	0.945978	0.391564
hsa-miR-16-2-3p	189	0.000761575	0.0178832	0.0186448	0.0207752	0.0408466	0.959153	0.215629	-57.7785	-53.7785	-53.5716	-53.6196	2.85528	4	61	0.0309632	8.79661	8.82992	8.9429	8.9293	8.8054	-0.917926	-0.441761	1.17324	0.978769	-0.792323	-0.00878661	0.0245238	0.137502	0.123898	-1.00611	1.01714	1.1	1.08967	-0.18361	0.485617	2.07533	2.25082	0.854928	0.628978	0.04218	0.0280122	0.0680703	0.201364	1.37489	1.55265	0.945978	0.929402	0.213453
hsa-miR-16-5p	190	0.000884482	0.00477902	0.00566351	0.005992	0.156172	0.843828	0.302534	-133.99	-129.99	-129.783	-129.831	2.74786	4	61	0.0361457	18.7805	18.8378	18.8367	18.857	18.8317	-1.68449	0.31717	0.275938	0.987396	0.103984	-0.0512626	0.00611051	0.00492869	0.0253211	-1.03617	1.00424	1.00342	1.01771	-2.06041	0.230628	0.14313	0.884271	0.0436316	0.818376	0.886659	0.380022	1.3602	0.0870474	0.0522432	0.420191	0.218971	0.945978	0.945978
hsa-miR-17-3p	191	0.0618787	0.12645	0.188328	0.222627	0.328568	0.671432	0.515531	70.5892	74.5892	74.7961	74.7481	7.80984	4	61	3.77423e-05	7.19359	7.00521	7.65552	7.54611	6.9408	-0.233415	-0.822415	1.21087	0.868774	-1.02381	0.252794	0.0644125	0.714721	0.605309	1.19151	1.04566	1.64117	1.5213	1.969	0.468657	4.02197	4.09475	0.0535004	0.640986	0.000161474	0.000126385	1.27164	0.193152	3.7919	3.8983	0.257311	0.937387	0.00187397
hsa-miR-17-5p	192	0.0126322	0.054617	0.0672492	0.0758739	0.187841	0.812159	0.374558	15.5807	19.5807	19.7876	19.7396	3.91427	4	61	0.00680502	10.3575	10.2173	10.0562	10.0455	10.2337	1.33414	0.267945	-0.956971	-1.03823	0.393116	0.123729	-0.0164577	-0.177513	-0.188197	1.08955	-1.01147	-1.13093	-1.13934	1.46982	-0.183335	-1.52359	-1.94228	0.146751	0.855143	0.132778	0.0567243	0.833419	0.0679612	0.876873	1.24623	0.536537	0.945978	0.502296
hsa-miR-181a-2-3p	193	0.162404	0.054538	0.216942	0.21154	0.748606	0.251394	0.784678	30.608	34.608	34.8149	34.7669	3.28684	4	61	0.0166482	5.26939	5.37324	5.18404	5.10555	5.40661	0.0128484	0.83563	-0.663345	-1.28513	1.09999	-0.137223	-0.0333689	-0.222575	-0.301059	-1.09979	-1.0234	-1.16681	-1.23205	-1.62336	-0.367182	-1.90198	-3.09201	0.109671	0.714754	0.0618983	0.00299613	0.95991	0.145843	1.20832	2.52344	0.442668	0.945978	0.28431
hsa-miR-181a-3p	194	0.0234433	0.166538	0.189981	0.186394	0.123398	0.876602	0.212229	81.5463	85.5463	85.7532	85.7052	1.23818	4	61	0.304236	3.05797	3.27504	3.24776	2.96846	3.06126	-0.482682	1.1512	0.945865	-1.15646	-0.457918	-0.00329	0.213779	0.1865	-0.0928056	-1.00228	1.15972	1.138	-1.06644	-0.0224252	1.37075	0.918451	-0.549695	0.982182	0.175475	0.362	0.584536	0.00780806	0.755784	0.441291	0.233189	0.992703	0.606779	0.772746
hsa-miR-181a-5p	195	0.0501063	0.0926625	0.142769	0.195968	0.350961	0.649039	0.59749	52.1861	56.1861	56.3929	56.3449	11.7877	4	61	3.71455e-07	9.32073	9.51946	8.86261	9.00535	9.66338	0.13759	0.726512	-1.22005	-0.797055	1.15301	-0.342644	-0.143917	-0.80077	-0.658033	-1.26808	-1.1049	-1.74203	-1.57793	-3.1169	-1.22241	-5.26264	-5.19854	0.00278658	0.226253	1.93973e-06	2.46389e-06	2.55493	0.645405	5.71226	5.60838	0.0222926	0.714418	4.60972e-05
hsa-miR-181b-5p	196	0.0850218	0.0497928	0.134815	0.129676	0.630657	0.369343	0.678133	21.3726	25.3726	25.5795	25.5315	2.05533	4	61	0.0977502	6.20508	6.30347	6.10979	6.13203	6.33115	-0.113143	0.878674	-1.07378	-0.849524	1.15777	-0.126072	-0.0276859	-0.221364	-0.199119	-1.09132	-1.01938	-1.16584	-1.148	-1.56155	-0.319203	-1.98065	-2.14134	0.123567	0.750663	0.0521446	0.0362499	0.908098	0.124555	1.28279	1.44069	0.482329	0.945978	0.252797
hsa-miR-181c-3p	197	0.00259436	0.204701	0.207295	0.199342	0.0125153	0.987485	0.0464596	89.5494	93.5494	93.7563	93.7083	0.419155	4	61	0.794197	2.9747	3.08994	3.12503	2.91538	2.95157	-0.401869	0.862556	1.2476	-1.05272	-0.655571	0.0231227	0.138364	0.173458	-0.0361966	1.01616	1.10066	1.12776	-1.02541	0.143218	0.815652	0.775719	-0.194948	0.88659	0.417873	0.440912	0.846082	0.0522772	0.378956	0.355648	0.0725877	0.945978	0.772746	0.772746
hsa-miR-181c-5p	198	0.00244354	0.201253	0.203697	0.195878	0.011996	0.988004	0.045554	88.4862	92.4862	92.6931	92.645	0.416921	4	61	0.795799	2.98159	3.08972	3.12483	2.91535	2.95168	-0.343482	0.852932	1.24138	-1.07639	-0.674439	0.0299122	0.138046	0.173154	-0.0363293	1.02095	1.10041	1.12752	-1.0255	0.186863	0.820844	0.781008	-0.197344	0.852388	0.414931	0.437818	0.844214	0.0693627	0.382024	0.358706	0.0735474	0.945978	0.772746	0.772746
hsa-miR-181d-5p	199	0.00290181	0.181168	0.18407	0.177287	0.0157648	0.984235	0.0534589	82.2671	86.2671	86.474	86.426	0.451839	4	61	0.770654	3.02812	3.09067	3.12545	2.91644	2.9504	0.0662513	0.768672	1.15921	-1.18772	-0.806412	0.0777145	0.140268	0.175047	-0.0339574	1.05534	1.10211	1.129	-1.02382	0.511466	0.8781	0.83185	-0.194325	0.610871	0.383335	0.408738	0.846567	0.21405	0.416421	0.388554	0.0723387	0.911232	0.772746	0.772746
hsa-miR-182-5p	200	0.159447	0.0481804	0.207628	0.219704	0.767948	0.232052	0.81694	23.7575	27.7575	27.9644	27.9164	6.61532	4	61	0.000172567	6.50811	6.32647	6.10293	6.16569	6.43233	1.16956	0.112696	-1.18805	-0.822842	0.728635	0.0757777	-0.105856	-0.329404	-0.26664	1.05393	-1.07613	-1.25649	-1.203	0.953708	-1.23908	-2.99464	-2.91339	0.343996	0.220061	0.00396584	0.00499068	0.463447	0.657456	2.40167	2.30184	0.772746	0.705593	0.0301354
hsa-miR-1827	201	0.00259436	0.204701	0.207295	0.199342	0.0125153	0.987485	0.0464596	89.5494	93.5494	93.7563	93.7083	0.419155	4	61	0.794197	2.9747	3.08994	3.12503	2.91538	2.95157	-0.401869	0.862556	1.2476	-1.05272	-0.655571	0.0231227	0.138364	0.173458	-0.0361966	1.01616	1.10066	1.12776	-1.02541	0.143218	0.815652	0.775719	-0.194948	0.88659	0.417873	0.440912	0.846082	0.0522772	0.378956	0.355648	0.0725877	0.945978	0.772746	0.772746
hsa-miR-183-5p	202	0.115779	0.0812367	0.197015	0.23382	0.587663	0.412337	0.7083	50.0625	54.0625	54.2694	54.2213	8.60853	4	61	1.41565e-05	5.87202	5.73855	5.20516	5.48186	5.84733	0.859221	0.387377	-1.4984	-0.520147	0.771953	0.0246837	-0.108778	-0.642172	-0.365472	1.01726	-1.07831	-1.56068	-1.2883	0.239409	-0.98238	-4.49934	-3.07773	0.811591	0.329793	3.12151e-05	0.003123	0.0906627	0.481759	4.50564	2.50543	0.945978	0.772746	0.000472831
hsa-miR-185-3p	203	0.0118764	0.0852027	0.0970791	0.102124	0.122338	0.877662	0.264168	40.6286	44.6286	44.8355	44.7875	2.05946	4	61	0.0971755	3.30991	3.34172	3.14784	3.07758	3.14841	0.915762	1.19368	-0.500183	-1.11403	-0.495237	0.161504	0.193315	-0.000566171	-0.0708271	1.11845	1.14339	-1.00039	-1.05032	1.53911	1.73314	-0.00389827	-0.586538	0.128948	0.0881238	0.996902	0.559679	0.889584	1.05491	0.00134738	0.252061	0.493552	0.376078	0.99855
hsa-miR-185-5p	204	0.0140689	0.119519	0.133587	0.141795	0.105316	0.894684	0.252771	60.6776	64.6776	64.8845	64.8365	2.01889	4	61	0.102962	10.7078	10.7815	10.5212	10.9409	10.612	-0.0301927	0.427611	-1.18959	1.41769	-0.625518	0.095842	0.169544	-0.0908106	0.328938	1.06869	1.1247	-1.06497	1.25609	0.771709	1.28572	-0.528274	2.30173	0.443266	0.203401	0.599226	0.0247799	0.353336	0.691646	0.22241	1.6059	0.772746	0.675788	0.901628
hsa-miR-186-3p	205	0.00259436	0.204701	0.207295	0.199342	0.0125153	0.987485	0.0464596	89.5494	93.5494	93.7563	93.7083	0.419155	4	61	0.794197	2.9747	3.08994	3.12503	2.91538	2.95157	-0.401869	0.862556	1.2476	-1.05272	-0.655571	0.0231227	0.138364	0.173458	-0.0361966	1.01616	1.10066	1.12776	-1.02541	0.143218	0.815652	0.775719	-0.194948	0.88659	0.417873	0.440912	0.846082	0.0522772	0.378956	0.355648	0.0725877	0.945978	0.772746	0.772746
hsa-miR-186-5p	206	0.00144927	0.0540921	0.0555414	0.101709	0.0260935	0.973907	0.510969	9.04786	13.0479	13.2548	13.2067	14.7601	4	61	1.72666e-08	9.83982	10.2315	10.0316	9.84937	10.3749	-0.95752	0.70481	-0.143669	-0.916979	1.31336	-0.535053	-0.143383	-0.343297	-0.525501	-1.449	-1.10449	-1.26865	-1.43943	-6.43737	-1.63811	-2.98277	-5.49709	2.12647e-08	0.106546	0.0041023	8.02669e-07	7.67234	0.972462	2.38697	6.09546	8.59093e-07	0.433336	0.030954
hsa-miR-187-3p	207	0.130063	0.0591472	0.18921	0.268342	0.687399	0.312601	0.815585	33.5357	37.5357	37.7426	37.6945	27.7417	4	61	3.86433e-13	8.15761	8.44773	7.61311	7.80338	8.58775	0.0862563	0.78746	-1.22972	-0.769861	1.12586	-0.430144	-0.140017	-0.974636	-0.784367	-1.34737	-1.10192	-1.96515	-1.72234	-4.88733	-1.48028	-7.99932	-7.73743	7.75825e-06	0.143945	4.41054e-11	1.24559e-10	5.11024	0.841804	10.3555	9.90462	0.000154148	0.529472	5.62692e-09
hsa-miR-187-5p	208	0	0.144934	0.144934	0.145474	0	1	0.0650264	67.8131	69.8131	69.8809	69.8926	1.06062	4	61	0.383776	3.23583	3.09379	3.12112	2.99023	3.0073	1.47958	0.0418891	0.318487	-1.00635	-0.833609	0.228532	0.0864947	0.113821	-0.0170659	1.17164	1.06179	1.08209	-1.0119	1.68497	0.608468	0.605772	-0.109423	0.0971049	0.545136	0.546914	0.913226	1.01276	0.263495	0.262081	0.0394216	0.404437	0.860333	0.86171
hsa-miR-188-5p	209	0	0.208859	0.208859	0.205557	0	1	0.0464623	90.1015	92.1015	92.1693	92.181	0.743076	4	61	0.566369	2.98826	3.0852	3.26245	2.91314	2.95514	-0.377746	0.318705	1.59216	-0.917424	-0.615699	0.0331209	0.13006	0.307313	-0.0419972	1.02322	1.09434	1.2374	-1.02954	0.203425	0.762168	1.36247	-0.224314	0.83948	0.448897	0.17806	0.823263	0.0759898	0.347853	0.749433	0.0844615	0.945978	0.773256	0.613094
hsa-miR-18a-3p	210	0.0303666	0.142916	0.173283	0.195877	0.175243	0.824757	0.364526	73.8795	77.8795	78.0864	78.0384	4.04771	4	61	0.00563489	5.51048	5.53441	5.15266	5.23072	5.7536	0.303479	0.401458	-1.16184	-0.84217	1.29908	-0.243119	-0.219194	-0.600943	-0.52288	-1.18355	-1.16408	-1.51671	-1.43682	-1.78596	-1.51073	-3.18958	-3.33716	0.0790762	0.13602	0.00225044	0.00144562	1.10195	0.866397	2.64773	2.83995	0.345371	0.508032	0.0185546
hsa-miR-18a-5p	211	0.0318885	0.119431	0.151319	0.170281	0.210736	0.789264	0.393014	63.9724	67.9724	68.1793	68.1313	3.76888	4	61	0.008364	7.56477	7.38943	7.00427	7.21776	7.42529	1.13381	0.320622	-1.46574	-0.475595	0.48691	0.13948	-0.0358539	-0.421019	-0.207529	1.10151	-1.02516	-1.33887	-1.15471	1.11992	-0.269731	-2.44244	-1.44755	0.267137	0.788277	0.017501	0.152864	0.573266	0.103321	1.75694	0.815695	0.772746	0.945978	0.104232
hsa-miR-18b-5p	212	0.00259436	0.204701	0.207295	0.199342	0.0125153	0.987485	0.0464596	89.5494	93.5494	93.7563	93.7083	0.419155	4	61	0.794197	2.9747	3.08994	3.12503	2.91538	2.95157	-0.401869	0.862556	1.2476	-1.05272	-0.655571	0.0231227	0.138364	0.173458	-0.0361966	1.01616	1.10066	1.12776	-1.02541	0.143218	0.815652	0.775719	-0.194948	0.88659	0.417873	0.440912	0.846082	0.0522772	0.378956	0.355648	0.0725877	0.945978	0.772746	0.772746
hsa-miR-190a-3p	213	0.00259436	0.204701	0.207295	0.199342	0.0125153	0.987485	0.0464596	89.5494	93.5494	93.7563	93.7083	0.419155	4	61	0.794197	2.9747	3.08994	3.12503	2.91538	2.95157	-0.401869	0.862556	1.2476	-1.05272	-0.655571	0.0231227	0.138364	0.173458	-0.0361966	1.01616	1.10066	1.12776	-1.02541	0.143218	0.815652	0.775719	-0.194948	0.88659	0.417873	0.440912	0.846082	0.0522772	0.378956	0.355648	0.0725877	0.945978	0.772746	0.772746
hsa-miR-190a-5p	214	0.940327	0.0933245	1.03365	0.956215	0.909714	0.0902862	0.918788	71.7036	75.7036	75.9105	75.8625	2.94783	4	61	0.0270997	9.37037	9.16997	9.34986	9.19331	9.01567	1.03609	-0.343207	0.894891	-0.182574	-1.40519	0.354698	0.154298	0.334184	0.177637	1.27872	1.11288	1.26066	1.13103	3.20633	1.29642	2.18203	1.39398	0.0021414	0.199713	0.0329691	0.16838	2.6693	0.699594	1.48189	0.77371	0.0177766	0.66681	0.175642
hsa-miR-190b	215	0.171507	0.0749929	0.2465	0.280133	0.695769	0.304231	0.776082	48.2748	52.2748	52.4817	52.4337	9.70396	4	61	3.85693e-06	5.99716	5.95829	6.66749	6.27138	5.97454	-0.580223	-0.707924	1.62201	0.320673	-0.654541	0.0226212	-0.0162489	0.692946	0.296839	1.0158	-1.01133	1.61658	1.22845	0.228253	-0.15255	5.05071	2.6004	0.820213	0.879257	4.26153e-06	0.0116658	0.0860735	0.0558842	5.37043	1.93309	0.945978	0.945978	9.30625e-05
hsa-miR-191-3p	216	0.0259131	0.111202	0.137115	0.131429	0.188988	0.811012	0.265008	58.986	62.986	63.1929	63.1449	0.943023	4	61	0.445328	4.23716	4.03015	4.06543	4.09339	4.08472	1.70275	-0.908383	-0.463395	-0.110806	-0.220165	0.152447	-0.0545614	-0.0192831	0.00866997	1.11145	-1.03854	-1.01346	1.00603	1.26913	-0.425929	-0.115988	0.062706	0.209214	0.671659	0.908043	0.950206	0.679409	0.172851	0.0418934	0.0221824	0.688334	0.945978	0.955752
hsa-miR-191-5p	217	0.0239076	0.059787	0.0836945	0.10564	0.285653	0.714347	0.515144	23.7987	27.7987	28.0056	27.9576	7.60786	4	61	4.85821e-05	13.8136	13.6666	13.2197	13.5908	13.7891	0.825541	0.211555	-1.65518	-0.105147	0.723228	0.0244925	-0.122489	-0.569364	-0.198304	1.01712	-1.08861	-1.48387	-1.14735	0.277591	-1.29798	-4.66224	-1.95212	0.782265	0.19918	1.7496e-05	0.0555179	0.106646	0.700755	4.75706	1.25557	0.945978	0.665947	0.000298665
hsa-miR-192-3p	218	0.00259436	0.204701	0.207295	0.199342	0.0125153	0.987485	0.0464596	89.5494	93.5494	93.7563	93.7083	0.419155	4	61	0.794197	2.9747	3.08994	3.12503	2.91538	2.95157	-0.401869	0.862556	1.2476	-1.05272	-0.655571	0.0231227	0.138364	0.173458	-0.0361966	1.01616	1.10066	1.12776	-1.02541	0.143218	0.815652	0.775719	-0.194948	0.88659	0.417873	0.440912	0.846082	0.0522772	0.378956	0.355648	0.0725877	0.945978	0.772746	0.772746
hsa-miR-192-5p	219	0.556639	0.241724	0.798363	1.01546	0.697225	0.302775	0.800898	119.715	123.715	123.922	123.874	21.3041	4	61	4.94047e-11	7.6753	7.7303	9.09096	8.90101	7.63282	-0.732082	-0.65622	1.22048	0.958485	-0.790668	0.0424767	0.0974782	1.45814	1.26818	1.02988	1.0699	2.74754	2.40858	0.238726	0.509728	5.91971	6.18798	0.812118	0.612082	1.59403e-07	5.63393e-08	0.0903809	0.213191	6.7975	7.24919	0.945978	0.912254	4.75742e-06
hsa-miR-193a-5p	220	0	0.229803	0.229803	0.23153	0	1	0.0685402	95.9309	97.9309	97.9986	98.0103	1.12215	4	61	0.354431	2.97511	3.0852	3.39471	2.96097	2.95514	-0.530436	0.0587317	1.71513	-0.606118	-0.637303	0.0199691	0.13006	0.439572	0.00582727	1.01394	1.09434	1.3562	1.00405	0.116926	0.726607	1.8579	0.0296722	0.907303	0.470246	0.068011	0.976425	0.0422478	0.327675	1.16742	0.010361	0.955387	0.792286	0.304729
hsa-miR-194-5p	221	0.611269	0.160877	0.772146	1.02967	0.791649	0.208351	0.869654	98.238	102.238	102.445	102.397	34.1822	4	61	5.84287e-15	6.58898	6.67222	8.11688	7.81455	6.5268	-0.730571	-0.62097	1.28101	0.882966	-0.812434	0.0621799	0.145428	1.59009	1.28775	1.04404	1.10606	3.01068	2.44147	0.428234	0.931402	7.91026	7.69944	0.669989	0.355317	6.27712e-11	1.44816e-10	0.173932	0.449384	10.2022	9.83918	0.945978	0.772746	7.60788e-09
hsa-miR-195-5p	222	0	0.0795444	0.0795444	0.0814601	0	1	0.083608	31.2156	33.2156	33.2834	33.295	1.39135	4	61	0.247578	7.30219	7.27745	7.52877	7.41266	7.25565	-0.465359	-0.681867	1.51822	0.501776	-0.87277	0.0465384	0.0218067	0.273122	0.157014	1.03278	1.01523	1.20842	1.11498	0.463165	0.20707	1.9621	1.35892	0.644894	0.836645	0.0543171	0.179174	0.190512	0.0774588	1.26506	0.746724	0.939201	0.945978	0.258851
hsa-miR-196a-5p	223	1.11322	0.0335647	1.14679	1.03583	0.970732	0.0292685	0.973067	17.6032	21.6032	21.8101	21.7621	4.51254	4	61	0.00293543	8.96726	9.02446	8.75884	8.81379	9.03979	0.364943	0.814538	-1.27321	-0.841358	0.935089	-0.0725367	-0.0153371	-0.280951	-0.226008	-1.05156	-1.01069	-1.215	-1.16959	-1.09322	-0.214799	-3.05844	-2.95692	0.278596	0.830641	0.00330228	0.00441452	0.555025	0.0805868	2.48119	2.35512	0.772746	0.945978	0.0256561
hsa-miR-196b-5p	224	0.293765	0.0648927	0.358657	0.35181	0.819068	0.180932	0.846218	44.0452	48.0452	48.252	48.204	5.79746	4	61	0.000507367	6.78954	6.57894	6.51624	6.4829	6.37519	1.56857	0.197754	-0.210393	-0.427428	-1.1285	0.414349	0.203752	0.141048	0.107706	1.3327	1.15169	1.10271	1.07751	4.49275	2.05423	1.10472	1.01386	3.19489e-05	0.0442448	0.273621	0.314656	4.49554	1.35414	0.56285	0.502163	0.000478051	0.220158	0.772746
hsa-miR-1972	225	0.00259436	0.204701	0.207295	0.199342	0.0125153	0.987485	0.0464596	89.5494	93.5494	93.7563	93.7083	0.419155	4	61	0.794197	2.9747	3.08994	3.12503	2.91538	2.95157	-0.401869	0.862556	1.2476	-1.05272	-0.655571	0.0231227	0.138364	0.173458	-0.0361966	1.01616	1.10066	1.12776	-1.02541	0.143218	0.815652	0.775719	-0.194948	0.88659	0.417873	0.440912	0.846082	0.0522772	0.378956	0.355648	0.0725877	0.945978	0.772746	0.772746
hsa-miR-197-3p	226	0.0931779	0.1185	0.211678	0.266902	0.440187	0.559813	0.624498	69.381	73.381	73.5879	73.5399	13.981	4	61	3.75238e-08	7.04118	6.49319	6.01408	6.37052	6.78865	1.26862	-0.122719	-1.33916	-0.434177	0.627441	0.252534	-0.295458	-0.774566	-0.418129	1.1913	-1.22727	-1.71068	-1.33619	2.02977	-2.2145	-4.49762	-2.91838	0.0467478	0.0305409	3.1405e-05	0.00492125	1.33024	1.51512	4.503	2.30792	0.230787	0.163064	0.000472831
hsa-miR-197-5p	227	0.00259436	0.204701	0.207295	0.199342	0.0125153	0.987485	0.0464596	89.5494	93.5494	93.7563	93.7083	0.419155	4	61	0.794197	2.9747	3.08994	3.12503	2.91538	2.95157	-0.401869	0.862556	1.2476	-1.05272	-0.655571	0.0231227	0.138364	0.173458	-0.0361966	1.01616	1.10066	1.12776	-1.02541	0.143218	0.815652	0.775719	-0.194948	0.88659	0.417873	0.440912	0.846082	0.0522772	0.378956	0.355648	0.0725877	0.945978	0.772746	0.772746
hsa-miR-1976	228	0.0607386	0.124383	0.185121	0.205123	0.328102	0.671898	0.482763	69.572	73.572	73.7789	73.7309	4.30024	4	61	0.00394981	4.01578	4.25265	3.7734	3.93611	4.34152	-0.207161	0.812783	-1.25085	-0.550228	1.19545	-0.325738	-0.0888698	-0.56812	-0.405411	-1.25331	-1.06354	-1.48259	-1.32447	-2.55817	-0.651964	-3.22347	-2.7652	0.0130219	0.516873	0.00203503	0.0075152	1.88533	0.286616	2.69143	2.12406	0.0828478	0.833046	0.0169516
hsa-miR-199a-3p	229	0.29637	0.364317	0.660687	1.21716	0.448578	0.551422	0.746978	138.096	142.096	142.303	142.255	27.8779	4	61	3.51461e-13	7.82227	7.21478	9.51158	8.70984	6.94187	-0.204245	-0.773928	1.37993	0.628095	-1.02986	0.880401	0.272911	2.56971	1.76798	1.84089	1.20824	5.93691	3.40576	4.03554	1.1664	8.50942	7.03717	0.000154288	0.247991	5.87281e-12	2.00029e-09	3.81167	0.605564	11.2312	8.69891	0.00180674	0.755189	1.42357e-09
hsa-miR-199a-5p	230	0	0.220979	0.220979	0.216902	0	1	0.0438994	93.5425	95.5425	95.6103	95.622	0.700205	4	61	0.594808	2.99514	3.0852	3.29952	2.97147	2.95514	-0.46479	0.16797	1.6737	-0.631093	-0.745789	0.039996	0.13006	0.344379	0.0163252	1.02811	1.09434	1.2696	1.01138	0.23882	0.740971	1.48433	0.0847706	0.812046	0.461554	0.14287	0.932721	0.0904196	0.335777	0.845059	0.0302481	0.945978	0.782383	0.527119
hsa-miR-199b-3p	231	0.212261	0.449135	0.661396	1.12869	0.320929	0.679071	0.660342	147.712	151.712	151.919	151.871	19.5563	4	61	2.12685e-10	4.40502	3.80152	5.93237	5.26233	3.61396	-0.201535	-0.815745	1.35293	0.670987	-1.00663	0.791059	0.187559	2.31841	1.64837	1.73034	1.13884	4.98784	3.13479	3.26963	0.724264	6.92316	5.91723	0.00177268	0.471672	3.13998e-09	1.60936e-07	2.75137	0.32636	8.50307	6.79335	0.0150771	0.793431	1.81222e-07
hsa-miR-199b-5p	232	0.350022	0.370867	0.720888	0.828867	0.485542	0.514458	0.62256	140.091	144.091	144.298	144.25	11.7606	4	61	3.82543e-07	3.98742	3.8268	5.07281	4.64028	3.31558	-0.261659	-0.493652	1.30604	0.681308	-1.23204	0.671839	0.51122	1.75723	1.3247	1.5931	1.42525	3.38049	2.50481	3.05146	2.16407	5.76578	5.22449	0.00336948	0.0343835	2.88195e-07	2.23678e-06	2.47244	1.46365	6.54031	5.65038	0.0260946	0.181581	8.12307e-06
hsa-miR-19a-3p	233	0.106042	0.176903	0.282944	0.573951	0.374779	0.625221	0.738136	92.2206	96.2206	96.4274	96.3794	31.4137	4	61	3.30334e-14	8.50966	8.4542	10.1558	9.53353	8.39231	-0.628275	-0.698038	1.44248	0.659733	-0.775899	0.11735	0.0618935	1.76345	1.14122	1.08474	1.04383	3.39508	2.20568	0.772402	0.380241	8.3856	6.52334	0.442859	0.705087	9.5714e-12	1.51773e-08	0.353735	0.151757	11.019	7.81881	0.772746	0.945978	2.10919e-09
hsa-miR-19b-1-5p	234	0.00030746	0.197515	0.197822	0.190464	0.00155422	0.998446	0.0281669	86.7815	90.7815	90.9884	90.9404	0.40069	4	61	0.807401	2.98822	3.08577	3.12162	2.91342	2.95471	-0.278491	0.829193	1.23626	-1.12794	-0.65902	0.0335119	0.131062	0.16691	-0.0412961	1.0235	1.0951	1.12265	-1.02904	0.211609	0.789348	0.760807	-0.226762	0.833118	0.432966	0.449704	0.821367	0.0792936	0.363546	0.347074	0.0854628	0.945978	0.772746	0.773256
hsa-miR-19b-3p	235	0.0685359	0.138364	0.2069	0.359149	0.331251	0.668749	0.671475	76.1495	80.1495	80.3564	80.3084	22.0116	4	61	2.78866e-11	10.9924	11.1693	12.3962	11.8245	11.1941	-0.8942	-0.591688	1.50634	0.528781	-0.54923	-0.201741	-0.0248301	1.20211	0.630428	-1.15009	-1.01736	2.30076	1.54802	-1.50213	-0.172693	6.46664	4.07677	0.138223	0.863465	1.89596e-08	0.000134295	0.859418	0.0637554	7.72217	3.87194	0.512314	0.945978	7.78952e-07
hsa-miR-200a-3p	236	0.00259436	0.204701	0.207295	0.199342	0.0125153	0.987485	0.0464596	89.5494	93.5494	93.7563	93.7083	0.419155	4	61	0.794197	2.9747	3.08994	3.12503	2.91538	2.95157	-0.401869	0.862556	1.2476	-1.05272	-0.655571	0.0231227	0.138364	0.173458	-0.0361966	1.01616	1.10066	1.12776	-1.02541	0.143218	0.815652	0.775719	-0.194948	0.88659	0.417873	0.440912	0.846082	0.0522772	0.378956	0.355648	0.0725877	0.945978	0.772746	0.772746
hsa-miR-200b-3p	237	0.0414699	0.173483	0.214953	0.201429	0.192925	0.807075	0.252373	86.2307	90.2307	90.4376	90.3895	0.261853	4	61	0.901285	3.09209	3.18285	3.16002	3.08609	3.21764	-0.969941	0.611932	0.214166	-1.07449	1.21834	-0.12555	-0.0347917	-0.057613	-0.131548	-1.09092	-1.02441	-1.04074	-1.09547	-0.83674	-0.217395	-0.277423	-0.761657	0.406005	0.828626	0.782393	0.4492	0.391469	0.0816415	0.106575	0.347561	0.772746	0.945978	0.945978
hsa-miR-200c-3p	238	0.0308377	0.0903228	0.121161	0.143367	0.254519	0.745481	0.458231	48.1439	52.1439	52.3508	52.3028	5.40224	4	61	0.000863821	3.68851	3.46945	3.41169	3.17971	3.38532	1.43279	0.232892	-0.0835245	-1.35423	-0.227929	0.303182	0.0841278	0.0263626	-0.205618	1.23386	1.06005	1.01844	-1.15318	2.79696	0.726209	0.175716	-1.64769	0.00689153	0.470488	0.861099	0.104559	2.16168	0.327451	0.0649467	0.980639	0.0485613	0.792286	0.945978
hsa-miR-202-3p	239	0.00496625	0.17423	0.179196	0.170992	0.0277141	0.972286	0.0640674	80.4769	84.4769	84.6838	84.6358	0.32099	4	61	0.862856	2.97625	3.09247	3.12989	2.96463	3.02751	-0.86015	0.754751	1.2748	-1.02153	-0.147866	-0.0512604	0.064958	0.102384	-0.0628744	-1.03617	1.04605	1.07355	-1.04454	-0.343582	0.413341	0.495592	-0.366407	0.732342	0.680806	0.621963	0.715329	0.135286	0.166977	0.206235	0.145494	0.945978	0.945978	0.922103
hsa-miR-204-5p	240	0.0542741	0.200742	0.255016	0.239517	0.212826	0.787174	0.274923	95.7083	99.7083	99.9151	99.8671	0.340621	4	61	0.849502	3.04862	3.15512	3.20068	2.99457	3.06044	-0.515581	0.753565	1.29649	-1.15974	-0.374739	-0.0118189	0.0946831	0.140244	-0.0658742	-1.00823	1.06783	1.10209	-1.04672	-0.0731938	0.549359	0.627515	-0.354394	0.941891	0.584765	0.532664	0.724266	0.0259992	0.233019	0.273547	0.140102	0.971138	0.889812	0.8489
hsa-miR-206	241	0	0.451572	0.451572	0.519019	0	1	0.183493	137.137	139.137	139.205	139.217	3.42712	4	61	0.0136174	3.52961	3.22772	4.25317	3.73228	3.22394	-0.14931	-0.856524	1.54573	0.325468	-0.865366	0.305665	0.00377417	1.02923	0.508334	1.23599	1.00262	2.04094	1.42241	1.27677	0.0150415	3.10327	1.8465	0.206524	0.988048	0.00289956	0.0696728	0.68503	0.00522188	2.53767	1.15694	0.682604	0.996546	0.0230444
hsa-miR-20a-3p	242	0.0420888	0.207213	0.249302	0.236152	0.168827	0.831173	0.234761	96.3444	100.344	100.551	100.503	0.479554	4	61	0.750598	3.52537	3.51052	3.70858	3.38908	3.50829	-0.0261179	-0.1556	1.57138	-1.21458	-0.175081	0.0170838	0.00223422	0.200292	-0.119215	1.01191	1.00155	1.14893	-1.08614	0.104242	0.0127942	0.883019	-0.632006	0.917319	0.989834	0.380693	0.529745	0.0374794	0.00443774	0.419426	0.275933	0.960096	0.996546	0.772746
hsa-miR-20a-5p	243	0.0275098	0.0548421	0.0823519	0.0859625	0.334051	0.665949	0.456115	19.7686	23.7686	23.9755	23.9275	1.82487	4	61	0.135583	12.2388	12.1156	12.3744	12.3168	12.2378	-0.18325	-1.44659	1.20679	0.61648	-0.193434	0.000993054	-0.122187	0.136527	0.0789695	1.00069	-1.08838	1.09926	1.05626	0.0117443	-1.3497	1.16652	0.811109	0.990668	0.1821	0.247944	0.420457	0.00407189	0.739691	0.605647	0.376279	0.996546	0.62346	0.755189
hsa-miR-20b-5p	244	0.165897	0.11126	0.277157	0.290691	0.598566	0.401434	0.678786	69.5381	73.5381	73.745	73.6969	5.67315	4	61	0.000599347	4.1206	4.23485	4.73676	4.53252	4.42247	-1.18821	-0.718214	1.34651	0.506305	0.0536069	-0.301872	-0.187621	0.314291	0.110046	-1.23274	-1.13888	1.2434	1.07926	-2.50171	-1.44767	1.88154	0.791827	0.0150583	0.152831	0.0646731	0.43153	1.82223	0.81579	1.18928	0.364989	0.0931153	0.553048	0.293751
hsa-miR-210-3p	245	0.0553386	0.0727045	0.128043	0.188825	0.432187	0.567813	0.6742	39.3863	43.3863	43.5932	43.5452	15.3684	4	61	9.543e-09	7.9556	8.44198	8.30259	8.20295	8.6786	-1.33932	0.466437	-0.0510455	-0.420999	1.34492	-0.722998	-0.23662	-0.376003	-0.47565	-1.65061	-1.17823	-1.29774	-1.39054	-7.41942	-2.26454	-2.78755	-4.23866	4.39785e-10	0.0271064	0.00707115	7.73832e-05	9.35676	1.56693	2.15051	4.11135	3.80728e-08	0.146993	0.0496825
hsa-miR-21-3p	246	0	0.222248	0.222248	0.394888	0	1	0.471821	93.8919	95.8919	95.9597	95.9713	13.6228	4	61	5.39619e-08	3.03206	3.16593	4.54783	3.42728	3.03206	-0.639611	-0.430248	1.73096	-0.0215037	-0.639601	-6.65256e-06	0.133862	1.51576	0.395218	-1	1.09723	2.8595	1.31514	-3.96095e-05	0.760452	6.51452	2.04635	0.999969	0.449914	1.5712e-08	0.0450389	1.36694e-05	0.34687	7.80377	1.34641	0.999969	0.773256	7.06399e-07
hsa-miR-215-5p	247	0	0.407201	0.407201	0.663023	0	1	0.423635	130.828	132.828	132.896	132.908	11.2089	4	61	6.99742e-07	3.13549	3.1689	4.84965	3.84255	3.09056	-0.638334	-0.594083	1.63209	0.298175	-0.697843	0.0449286	0.0783382	1.75909	0.75199	1.03163	1.0558	3.38484	1.68411	0.197628	0.328777	5.58539	2.87653	0.843993	0.74345	5.74078e-07	0.00553227	0.073661	0.128748	6.24103	2.2571	0.945978	0.945978	1.51257e-05
hsa-miR-21-5p	248	0.0478107	0.10454	0.152351	0.277735	0.313819	0.686181	0.678488	58.6094	62.6094	62.8162	62.7682	23.9705	4	61	6.03585e-12	11.8256	11.696	12.9673	12.255	11.5855	-0.425855	-0.655489	1.59749	0.335141	-0.851286	0.240057	0.110482	1.38177	0.669464	1.18104	1.07959	2.60588	1.59048	2.05678	0.884498	8.5533	4.98174	0.0439909	0.379901	4.94036e-12	5.49265e-06	1.35664	0.42033	11.3062	5.26022	0.219864	0.772746	1.3306e-09
hsa-miR-219a-5p	249	0.0359032	0.168423	0.204326	0.195984	0.175715	0.824285	0.251583	83.9112	87.9112	88.1181	88.0701	0.98733	4	61	0.421287	3.07327	3.27995	3.23192	3.04416	3.0269	-0.498524	1.27894	0.865841	-0.748921	-0.897338	0.0463721	0.253047	0.205014	0.0172572	1.03266	1.19172	1.1527	1.01203	0.313794	1.60653	1.00235	0.101457	0.754748	0.113323	0.320136	0.919521	0.122198	0.945681	0.494666	0.0364384	0.945978	0.452768	0.772746
hsa-miR-219b-5p	250	0.00259436	0.204701	0.207295	0.199342	0.0125153	0.987485	0.0464596	89.5494	93.5494	93.7563	93.7083	0.419155	4	61	0.794197	2.9747	3.08994	3.12503	2.91538	2.95157	-0.401869	0.862556	1.2476	-1.05272	-0.655571	0.0231227	0.138364	0.173458	-0.0361966	1.01616	1.10066	1.12776	-1.02541	0.143218	0.815652	0.775719	-0.194948	0.88659	0.417873	0.440912	0.846082	0.0522772	0.378956	0.355648	0.0725877	0.945978	0.772746	0.772746
hsa-miR-221-3p	251	0.00509451	0.0395916	0.0446862	0.056238	0.114006	0.885994	0.377584	-6.41079	-2.41079	-2.20389	-2.25191	6.43114	4	61	0.000219414	11.8822	12.0654	12.0127	11.8802	12.2028	-0.933254	0.418619	0.0297277	-0.948207	1.43311	-0.320595	-0.137443	-0.19013	-0.322621	-1.24885	-1.09995	-1.14087	-1.2506	-4.48344	-1.8092	-1.92105	-3.92077	3.30152e-05	0.0753473	0.0594026	0.000226208	4.48129	1.12293	1.22619	3.64549	0.00048798	0.332076	0.276376
hsa-miR-221-5p	252	0.0147971	0.0900183	0.104815	0.11725	0.141173	0.858827	0.326238	44.6114	48.6114	48.8183	48.7703	3.5352	4	61	0.011668	4.63511	4.83495	5.08627	4.7582	4.93167	-1.25031	-0.0834384	1.38403	-0.531579	0.481292	-0.29656	-0.0967178	0.154607	-0.173468	-1.22821	-1.06934	1.11312	-1.12777	-2.74772	-0.842128	1.03498	-1.39654	0.00788017	0.403006	0.304764	0.167612	2.10346	0.394689	0.516036	0.775695	0.0542657	0.772746	0.772746
hsa-miR-222-3p	253	0.0940387	0.0457929	0.139832	0.14074	0.672514	0.327486	0.727644	17.4739	21.4739	21.6808	21.6327	2.12078	4	61	0.089028	8.12273	7.94797	8.1208	7.97853	8.12649	0.717701	-1.25986	0.695923	-0.914003	0.760236	-0.00375883	-0.178518	-0.00568342	-0.147954	-1.00261	-1.13172	-1.00395	-1.108	-0.0485404	-2.14526	-0.0530169	-1.65883	0.961444	0.0359222	0.957892	0.102284	0.0170759	1.44464	0.0186836	0.990191	0.980425	0.186457	0.978478
hsa-miR-223-3p	254	0.204252	0.136457	0.340709	0.396458	0.59949	0.40051	0.711153	82.0155	86.0155	86.2224	86.1744	14.7243	4	61	1.78871e-08	13.3375	12.6962	13.0802	12.9679	12.3696	1.20511	-0.522968	0.511755	0.209158	-1.40306	0.96786	0.326591	0.710564	0.598274	1.95594	1.25405	1.63644	1.5139	7.24262	2.2754	3.84107	3.88711	8.86545e-10	0.0264078	0.000294097	0.00025281	9.0523	1.57827	3.53151	3.59721	5.9694e-08	0.144172	0.00311306
hsa-miR-223-5p	255	0.0919119	0.142543	0.234455	0.516009	0.392024	0.607976	0.76561	79.4712	83.4712	83.6781	83.63	38.1797	4	61	5.62594e-16	5.71334	5.44746	7.33193	6.18935	5.21354	-0.316894	-0.633907	1.61297	0.250652	-0.912821	0.499808	0.233927	2.1184	0.975812	1.41403	1.17603	4.34211	1.96675	3.66428	1.60031	11.2202	6.21272	0.00052121	0.114697	1.81548e-16	5.11639e-08	3.28299	0.940449	15.741	7.29104	0.00511154	0.455779	4.40073e-13
hsa-miR-22-3p	256	0.0530212	0.0639782	0.116999	0.157297	0.453175	0.546825	0.656272	32.1002	36.1002	36.3071	36.2591	11.7418	4	61	3.90396e-07	8.30684	8.2683	8.96776	8.6316	8.30929	-0.63007	-0.757924	1.56258	0.44734	-0.621926	-0.00245512	-0.040994	0.658472	0.322307	-1.0017	-1.02882	1.57841	1.25033	-0.0268536	-0.418054	5.20309	3.06125	0.978664	0.677376	2.42247e-06	0.00327556	0.00936631	0.16917	5.61574	2.48471	0.99006	0.945978	5.64621e-05
hsa-miR-22-5p	257	0.0242701	0.145549	0.169819	0.177457	0.142917	0.857083	0.280516	73.9787	77.9787	78.1856	78.1376	1.68433	4	61	0.165196	3.70871	3.54558	3.97159	3.83277	3.71174	-0.285771	-1.31321	1.37005	0.495633	-0.266693	-0.0030289	-0.166152	0.259858	0.121031	-1.0021	-1.12206	1.19736	1.08751	-0.0220689	-1.13755	1.36797	0.76624	0.982465	0.259755	0.176341	0.446489	0.0076829	0.585436	0.753646	0.35019	0.992703	0.772746	0.608905
hsa-miR-2277-3p	258	0	0.153528	0.153528	0.14943	0	1	0.0358053	71.3272	73.3272	73.395	73.4066	0.566307	4	61	0.688017	3.28171	3.14402	3.12112	3.08568	3.19368	1.5326	-0.279265	-0.580592	-1.04693	0.374185	0.088031	-0.0496575	-0.0725562	-0.107994	1.06292	-1.03502	-1.05158	-1.07773	0.630626	-0.339409	-0.37519	-0.672773	0.530641	0.735467	0.708821	0.503632	0.275199	0.133437	0.149464	0.297887	0.847483	0.945978	0.945978
hsa-miR-23a-3p	259	0.0276782	0.112983	0.140661	0.225693	0.196773	0.803227	0.565741	60.1837	64.1837	64.3906	64.3426	14.9166	4	61	1.48081e-08	9.14121	8.80654	9.87684	9.38319	8.82403	-0.146493	-0.899058	1.50765	0.397617	-0.859719	0.317184	-0.0174948	1.05281	0.559159	1.2459	-1.0122	2.07457	1.47341	2.61921	-0.135427	6.28141	4.01134	0.011104	0.89272	3.91396e-08	0.000167328	1.95452	0.0492846	7.40738	3.77643	0.0729436	0.949103	1.50594e-06
hsa-miR-23b-3p	260	0.00578383	0.0809213	0.0867052	0.198204	0.0667069	0.933293	0.632767	35.416	39.416	39.6229	39.5749	23.5356	4	61	8.42337e-12	8.42811	8.2426	9.44668	8.77126	8.33361	-0.44056	-0.818337	1.63367	0.258229	-0.632997	0.0944977	-0.0910128	1.11306	0.437644	1.06769	-1.06512	2.16304	1.35439	0.926575	-0.843185	7.88413	3.73002	0.357799	0.402419	6.96206e-11	0.000422007	0.446361	0.395321	10.1573	3.37468	0.772746	0.772746	8.03621e-09
hsa-miR-23b-5p	261	0.00259436	0.204701	0.207295	0.199342	0.0125153	0.987485	0.0464596	89.5494	93.5494	93.7563	93.7083	0.419155	4	61	0.794197	2.9747	3.08994	3.12503	2.91538	2.95157	-0.401869	0.862556	1.2476	-1.05272	-0.655571	0.0231227	0.138364	0.173458	-0.0361966	1.01616	1.10066	1.12776	-1.02541	0.143218	0.815652	0.775719	-0.194948	0.88659	0.417873	0.440912	0.846082	0.0522772	0.378956	0.355648	0.0725877	0.945978	0.772746	0.772746
hsa-miR-23c	262	0.00259436	0.204701	0.207295	0.199342	0.0125153	0.987485	0.0464596	89.5494	93.5494	93.7563	93.7083	0.419155	4	61	0.794197	2.9747	3.08994	3.12503	2.91538	2.95157	-0.401869	0.862556	1.2476	-1.05272	-0.655571	0.0231227	0.138364	0.173458	-0.0361966	1.01616	1.10066	1.12776	-1.02541	0.143218	0.815652	0.775719	-0.194948	0.88659	0.417873	0.440912	0.846082	0.0522772	0.378956	0.355648	0.0725877	0.945978	0.772746	0.772746
hsa-miR-24-3p	263	0.0122684	0.0797774	0.0920458	0.181283	0.133286	0.866714	0.613024	36.9844	40.9844	41.1913	41.1433	20.3835	4	61	1.05674e-10	9.06469	8.76099	9.75367	9.34213	8.72213	-0.148786	-0.854526	1.45224	0.495909	-0.944838	0.342569	0.0388644	1.03155	0.620003	1.26801	1.0273	2.04421	1.53688	3.37248	0.359711	7.33721	5.30376	0.00129817	0.720306	6.09307e-10	1.66301e-06	2.88667	0.142483	9.21516	5.7791	0.0116116	0.945978	4.9232e-08
hsa-miR-25-3p	264	0.00623836	0.0336514	0.0398898	0.0392362	0.15639	0.84361	0.250017	-14.922	-10.922	-10.7151	-10.7631	1.40414	4	61	0.243306	13.8475	13.7002	13.7766	13.7648	13.7542	1.49083	-1.29418	0.149754	-0.0729844	-0.273426	0.0933345	-0.0540007	0.0223874	0.0106039	1.06683	-1.03814	1.01564	1.00738	1.41371	-0.768059	0.245001	0.139552	0.16253	0.445415	0.807278	0.889474	0.789065	0.351235	0.0929771	0.0508669	0.578408	0.772746	0.945978
hsa-miR-25-5p	265	0.0143836	0.119006	0.133389	0.206565	0.107832	0.892168	0.489681	60.5051	64.5051	64.712	64.664	11.2774	4	61	6.48845e-07	4.39898	4.38563	3.46579	3.96482	4.35304	0.705343	0.672339	-1.60153	-0.367921	0.591768	0.045944	0.0325933	-0.887251	-0.388221	1.03236	1.02285	-1.84965	-1.30878	0.370692	0.247629	-5.172	-2.72208	0.712151	0.805253	2.71965e-06	0.00844514	0.147428	0.0940676	5.56549	2.07339	0.945978	0.945978	6.21928e-05
hsa-miR-26a-2-3p	266	0.00259436	0.204701	0.207295	0.199342	0.0125153	0.987485	0.0464596	89.5494	93.5494	93.7563	93.7083	0.419155	4	61	0.794197	2.9747	3.08994	3.12503	2.91538	2.95157	-0.401869	0.862556	1.2476	-1.05272	-0.655571	0.0231227	0.138364	0.173458	-0.0361966	1.01616	1.10066	1.12776	-1.02541	0.143218	0.815652	0.775719	-0.194948	0.88659	0.417873	0.440912	0.846082	0.0522772	0.378956	0.355648	0.0725877	0.945978	0.772746	0.772746
hsa-miR-26a-5p	267	0.0407503	0.0208552	0.0616055	0.0604229	0.661472	0.338528	0.710983	-30.8315	-26.8315	-26.6246	-26.6726	3.88622	4	61	0.00708088	12.485	12.4229	12.6852	12.5325	12.4571	-0.307583	-0.913997	1.64603	0.155541	-0.579992	0.0279183	-0.034231	0.228138	0.0753824	1.01954	-1.02401	1.17132	1.05364	0.534257	-0.60962	3.15366	1.25244	0.595106	0.544378	0.00250202	0.21519	0.225406	0.264099	2.60171	0.667177	0.89866	0.860333	0.0202839
hsa-miR-26b-3p	268	0	0.156329	0.156329	0.160865	0	1	0.0879999	72.4302	74.4302	74.498	74.5096	1.47149	4	61	0.221903	3.28902	3.1782	3.18788	3.10571	2.95514	1.17843	0.282922	0.361117	-0.302893	-1.51958	0.33388	0.22306	0.232737	0.150565	1.2604	1.16721	1.17506	1.11	2.37028	1.5109	1.19266	0.929538	0.0209515	0.135978	0.237622	0.356274	1.67879	0.866531	0.624113	0.448216	0.12092	0.508032	0.739046
hsa-miR-26b-5p	269	0.294399	0.080014	0.374413	0.400516	0.786295	0.213705	0.833311	55.4154	59.4154	59.6223	59.5743	14.2037	4	61	2.99974e-08	12.223	11.9502	12.8788	12.308	11.9443	-0.0992739	-0.814207	1.61969	0.123578	-0.829786	0.278689	0.00594349	0.93447	0.363707	1.21309	1.00413	1.91119	1.28673	2.72158	0.0539775	6.59184	3.08355	0.00845637	0.957129	1.15956e-08	0.00307073	2.07282	0.0190293	7.93571	2.51276	0.0577415	0.978112	5.73625e-07
hsa-miR-27a-3p	270	0.100145	0.156934	0.257079	0.458132	0.389551	0.610449	0.709295	85.2775	89.2775	89.4844	89.4364	24.7221	4	61	3.42135e-12	8.08799	7.71222	9.19653	8.57663	7.55516	-0.205413	-0.765909	1.44806	0.523432	-1.00017	0.532827	0.157055	1.64136	1.02147	1.44676	1.11501	3.1196	2.02998	3.72303	1.02403	8.28557	6.19819	0.000431626	0.309863	1.42087e-11	5.41432e-08	3.36489	0.50883	10.8474	7.26646	0.00434133	0.772746	2.53685e-09
hsa-miR-27a-5p	271	0.000302836	0.151025	0.151328	0.199933	0.00200119	0.997999	0.292389	70.4357	74.4357	74.6426	74.5945	6.23641	4	61	0.000283324	3.08317	3.09419	3.92436	3.13113	3.08452	-0.487369	-0.457578	1.78638	-0.357725	-0.483708	-0.00135452	0.00966723	0.839845	0.0466087	-1.00094	1.00672	1.78986	1.03283	-0.00978067	0.0665736	4.37767	0.292668	0.992228	0.947139	4.78286e-05	0.770769	0.00338844	0.0235863	4.32031	0.113076	0.996546	0.974062	0.000690098
hsa-miR-27b-3p	272	0.0350519	0.0335405	0.0685924	0.0699364	0.511018	0.488982	0.595978	-5.86504	-1.86504	-1.65815	-1.70616	3.2939	4	61	0.0164807	9.62061	9.49836	9.49665	9.60626	9.40365	1.06804	-0.29909	-0.318193	0.907536	-1.35829	0.216966	0.0947155	0.0930073	0.202614	1.16229	1.06785	1.06659	1.15078	3.27635	1.33268	1.01461	2.65669	0.00173724	0.187593	0.314302	0.0100577	2.76014	0.726784	0.502653	1.9975	0.0148277	0.635091	0.772746
hsa-miR-28-3p	273	0.0145258	0.0934591	0.107985	0.107482	0.134517	0.865483	0.235619	46.6807	50.6807	50.8876	50.8395	1.61759	4	61	0.181319	5.72892	5.55627	5.91625	5.66379	5.68749	0.139748	-1.17318	1.56428	-0.355544	-0.175308	0.041431	-0.131223	0.228762	-0.0237016	1.02913	-1.09522	1.17183	-1.01656	0.376823	-1.122	1.50327	-0.187316	0.707613	0.266259	0.137929	0.852034	0.150204	0.574695	0.860345	0.069543	0.945978	0.772746	0.512314
hsa-miR-28-5p	274	0	0.151007	0.151007	0.146422	0	1	0.0321546	70.3172	72.3172	72.3849	72.3966	0.506649	4	61	0.730979	3.05331	3.11023	3.12112	2.92564	2.98426	0.172492	0.854441	0.984867	-1.357	-0.6548	0.0690547	0.125977	0.136864	-0.0586131	1.04903	1.09125	1.09951	-1.04146	0.498798	0.868215	0.713612	-0.368179	0.619716	0.388679	0.478188	0.714014	0.207808	0.410408	0.320401	0.146293	0.919896	0.772746	0.800503
hsa-miR-296-3p	275	0.0635363	0.173187	0.236723	0.274626	0.268399	0.731601	0.458644	88.2242	92.2242	92.4311	92.3831	5.9917	4	61	0.00039163	4.44809	4.39167	3.61198	4.01167	4.17768	0.949192	0.781784	-1.53189	-0.345852	0.146768	0.27041	0.213995	-0.565694	-0.166009	1.20615	1.1599	-1.4801	-1.12195	1.80116	1.33326	-2.72236	-0.960457	0.0766215	0.187406	0.00843867	0.340617	1.11565	0.727217	2.07373	0.467734	0.33586	0.635091	0.0577415
hsa-miR-296-5p	276	0.139744	0.321338	0.461082	0.685779	0.303079	0.696921	0.599324	126.833	130.833	131.04	130.992	13.4482	4	61	6.45118e-08	5.86459	4.83151	4.39742	4.63139	5.09906	1.59157	-0.235755	-1.00357	-0.589727	0.237488	0.765533	-0.267549	-0.701638	-0.467668	1.7	-1.20376	-1.62635	-1.38287	3.7416	-1.22216	-2.47762	-1.98527	0.000406516	0.22635	0.0160114	0.0516152	3.39092	0.645219	1.79557	1.28722	0.00414031	0.714418	0.0972722
hsa-miR-299-3p	277	0.00259436	0.204701	0.207295	0.199342	0.0125153	0.987485	0.0464596	89.5494	93.5494	93.7563	93.7083	0.419155	4	61	0.794197	2.9747	3.08994	3.12503	2.91538	2.95157	-0.401869	0.862556	1.2476	-1.05272	-0.655571	0.0231227	0.138364	0.173458	-0.0361966	1.01616	1.10066	1.12776	-1.02541	0.143218	0.815652	0.775719	-0.194948	0.88659	0.417873	0.440912	0.846082	0.0522772	0.378956	0.355648	0.0725877	0.945978	0.772746	0.772746
hsa-miR-299-5p	278	0.109851	0.151111	0.260962	0.266973	0.420945	0.579055	0.520697	83.74	87.74	87.9469	87.8989	2.79099	4	61	0.0339676	3.5077	3.84811	3.48289	3.41341	3.7147	-0.472378	1.40477	-0.60918	-0.992311	0.669096	-0.207002	0.133412	-0.231811	-0.30129	-1.15429	1.09689	-1.17431	-1.23225	-1.4736	0.88585	-1.19217	-1.86253	0.145732	0.379177	0.237812	0.0673464	0.836444	0.421158	0.623767	1.17169	0.533618	0.772746	0.739046
hsa-miR-29a-3p	279	0.0945323	0.309514	0.404046	0.730154	0.233964	0.766036	0.634445	122.712	126.712	126.919	126.871	20.2552	4	61	1.17667e-10	8.62941	8.99487	10.8481	9.55686	8.91979	-0.862406	-0.447923	1.65395	0.189459	-0.53308	-0.290373	0.0750848	1.92835	0.637077	-1.22296	1.05342	3.80619	1.55518	-1.44761	0.350464	6.94583	2.75893	0.152845	0.727198	2.87088e-09	0.00764441	0.815749	0.138347	8.54198	2.11666	0.553048	0.945978	1.69732e-07
hsa-miR-29b-2-5p	280	0	0.0959246	0.0959246	0.0937746	0	1	0.040023	42.6376	44.6376	44.7054	44.7171	0.635797	4	61	0.638919	3.18144	3.12176	3.12112	3.00273	3.16003	0.926528	0.0628511	0.0535929	-1.65965	0.616676	0.0214111	-0.0382699	-0.0389096	-0.157296	1.01495	-1.02688	-1.02734	-1.1152	0.194046	-0.330921	-0.254544	-1.2397	0.846785	0.741838	0.799932	0.219835	0.072227	0.129691	0.0969472	0.657903	0.945978	0.945978	0.945978
hsa-miR-29b-3p	281	0.0488393	0.0892293	0.138069	0.269722	0.353732	0.646268	0.718455	49.9519	53.9519	54.1588	54.1108	28.6594	4	61	2.05126e-13	8.68048	8.62968	9.83164	9.21814	8.46754	-0.508638	-0.599288	1.5457	0.450872	-0.888641	0.212937	0.162141	1.3641	0.750605	1.15905	1.11895	2.57415	1.6825	1.97386	1.40334	9.13537	6.04267	0.0529313	0.165586	5.04017e-13	9.90768e-08	1.27629	0.780975	12.2976	7.00403	0.255589	0.585958	4.07246e-10
hsa-miR-29c-3p	282	0.0438634	0.120718	0.164582	0.247884	0.266515	0.733485	0.581849	66.1586	70.1586	70.3655	70.3174	14.7422	4	61	1.75743e-08	11.284	11.3803	12.3085	11.8397	11.2307	-0.706866	-0.497209	1.52401	0.503101	-0.823041	0.0533505	0.14963	1.07783	0.608998	1.03767	1.10929	2.11086	1.5252	0.425648	1.11669	6.21295	4.22035	0.671862	0.268504	5.1118e-08	8.24036e-05	0.17272	0.571049	7.29143	4.08405	0.945978	0.772746	1.87911e-06
hsa-miR-29c-5p	283	0.0693604	0.114959	0.184319	0.227198	0.376306	0.623694	0.570164	65.9656	69.9656	70.1725	70.1245	6.74178	4	61	0.000146463	6.17134	6.15012	5.82678	5.81847	6.47463	0.302758	0.225415	-0.952975	-0.983244	1.40805	-0.303283	-0.324505	-0.647846	-0.656152	-1.23395	-1.25223	-1.56683	-1.57587	-2.47627	-2.47295	-3.82149	-4.65257	0.0160662	0.0162023	0.000313553	1.81119e-05	1.79409	1.79042	3.50369	4.74204	0.0973612	0.0979413	0.00327609
hsa-miR-301a-3p	284	0.114191	0.140645	0.254836	0.279918	0.448095	0.551905	0.575252	80.0255	84.0255	84.2324	84.1843	5.40367	4	61	0.000862141	5.56506	5.44289	5.59048	5.72821	5.06562	0.343614	-0.141085	0.444455	0.990888	-1.63787	0.499439	0.37727	0.524857	0.662587	1.41366	1.29888	1.43879	1.58292	3.68453	2.59514	2.79727	4.24466	0.000488499	0.0118274	0.0068856	7.58038e-05	3.31114	1.92711	2.16206	4.12031	0.00485295	0.0762491	0.0485613
hsa-miR-301a-5p	285	0.00259436	0.204701	0.207295	0.199342	0.0125153	0.987485	0.0464596	89.5494	93.5494	93.7563	93.7083	0.419155	4	61	0.794197	2.9747	3.08994	3.12503	2.91538	2.95157	-0.401869	0.862556	1.2476	-1.05272	-0.655571	0.0231227	0.138364	0.173458	-0.0361966	1.01616	1.10066	1.12776	-1.02541	0.143218	0.815652	0.775719	-0.194948	0.88659	0.417873	0.440912	0.846082	0.0522772	0.378956	0.355648	0.0725877	0.945978	0.772746	0.772746
hsa-miR-3064-5p	286	0.00259436	0.204701	0.207295	0.199342	0.0125153	0.987485	0.0464596	89.5494	93.5494	93.7563	93.7083	0.419155	4	61	0.794197	2.9747	3.08994	3.12503	2.91538	2.95157	-0.401869	0.862556	1.2476	-1.05272	-0.655571	0.0231227	0.138364	0.173458	-0.0361966	1.01616	1.10066	1.12776	-1.02541	0.143218	0.815652	0.775719	-0.194948	0.88659	0.417873	0.440912	0.846082	0.0522772	0.378956	0.355648	0.0725877	0.945978	0.772746	0.772746
hsa-miR-30a-3p	287	0.446579	0.417514	0.864093	0.744172	0.516818	0.483182	0.527478	148.096	152.096	152.303	152.254	0.684916	4	61	0.605137	4.73246	4.81367	5.22129	4.83294	4.90743	-0.893408	-0.464361	1.68931	-0.36256	0.0310153	-0.174963	-0.0937587	0.313862	-0.0744911	-1.12894	-1.06715	1.24303	-1.05299	-0.748823	-0.373875	0.970403	-0.276827	0.456842	0.709794	0.335678	0.782849	0.340234	0.148868	0.474077	0.106322	0.777998	0.945978	0.772746
hsa-miR-30a-5p	288	3.07192	0.593479	3.6654	3.57385	0.838086	0.161914	0.861613	179.968	183.968	184.175	184.127	15.1489	4	61	1.18053e-08	6.78446	7.06324	9.06387	8.24451	6.87931	-0.819482	-0.541764	1.45124	0.635002	-0.724995	-0.0948487	0.183932	2.18457	1.36521	-1.06795	1.13598	4.54591	2.57613	-0.340057	0.613117	5.65743	4.24919	0.734982	0.542078	4.36257e-07	7.46331e-05	0.133723	0.265938	6.36026	4.12707	0.945978	0.859181	1.18819e-05
hsa-miR-30b-3p	289	0.00259436	0.204701	0.207295	0.199342	0.0125153	0.987485	0.0464596	89.5494	93.5494	93.7563	93.7083	0.419155	4	61	0.794197	2.9747	3.08994	3.12503	2.91538	2.95157	-0.401869	0.862556	1.2476	-1.05272	-0.655571	0.0231227	0.138364	0.173458	-0.0361966	1.01616	1.10066	1.12776	-1.02541	0.143218	0.815652	0.775719	-0.194948	0.88659	0.417873	0.440912	0.846082	0.0522772	0.378956	0.355648	0.0725877	0.945978	0.772746	0.772746
hsa-miR-30b-5p	290	0.0326411	0.0958782	0.128519	0.147401	0.253978	0.746022	0.440608	51.7703	55.7703	55.9772	55.9292	5.84914	4	61	0.00047351	7.80103	7.94904	8.40639	8.20001	8.04254	-1.19602	-0.561018	1.40115	0.515751	-0.159865	-0.241511	-0.0935021	0.363848	0.157475	-1.18223	-1.06696	1.28685	1.11533	-2.16253	-0.783416	2.35388	1.22481	0.0345073	0.436414	0.021816	0.225356	1.46209	0.360101	1.66123	0.647132	0.181838	0.772746	0.124136
hsa-miR-30c-1-3p	291	0.0033117	0.101425	0.104737	0.0993421	0.0316192	0.968381	0.0645396	47.6586	51.6586	51.8655	51.8175	0.231804	4	61	0.91946	3.40859	3.38218	3.40719	3.41865	3.31261	0.527854	-0.0849716	0.495345	0.761464	-1.69969	0.0959796	0.0695744	0.0945788	0.106045	1.06879	1.04941	1.06775	1.07627	0.842858	0.5797	0.599838	0.809649	0.402601	0.564252	0.550836	0.421289	0.395126	0.248527	0.258978	0.37542	0.772746	0.875638	0.864784
hsa-miR-30c-2-3p	292	0.00259436	0.204701	0.207295	0.199342	0.0125153	0.987485	0.0464596	89.5494	93.5494	93.7563	93.7083	0.419155	4	61	0.794197	2.9747	3.08994	3.12503	2.91538	2.95157	-0.401869	0.862556	1.2476	-1.05272	-0.655571	0.0231227	0.138364	0.173458	-0.0361966	1.01616	1.10066	1.12776	-1.02541	0.143218	0.815652	0.775719	-0.194948	0.88659	0.417873	0.440912	0.846082	0.0522772	0.378956	0.355648	0.0725877	0.945978	0.772746	0.772746
hsa-miR-30c-5p	293	0.00917338	0.0496199	0.0587933	0.061265	0.156028	0.843972	0.291705	8.75519	12.7552	12.9621	12.9141	2.16075	4	61	0.0840805	10.2203	10.2068	10.4602	10.3268	10.3482	-0.889186	-1.0195	1.42546	0.138477	0.344743	-0.127902	-0.141409	0.112021	-0.0213803	-1.0927	-1.10298	1.08074	-1.01493	-1.59541	-1.65638	1.00958	-0.231719	0.115788	0.102781	0.316682	0.817532	0.936336	0.988087	0.499376	0.0874953	0.457864	0.421559	0.772746
hsa-miR-30d-3p	294	0.00258935	0.106021	0.108611	0.106032	0.0238407	0.976159	0.0791671	49.9882	53.9882	54.1951	54.1471	0.672277	4	61	0.613744	3.32913	3.29967	3.12437	3.18752	3.27337	1.01898	0.671216	-1.39824	-0.652663	0.360709	0.0557614	0.0263028	-0.148999	-0.0858417	1.03941	1.0184	-1.1088	-1.06131	0.479307	0.214768	-0.924885	-0.641554	0.633434	0.830665	0.35867	0.523566	0.198299	0.0805742	0.445305	0.281029	0.930783	0.945978	0.772746
hsa-miR-30d-5p	295	0.0117511	0.0283799	0.040131	0.0460766	0.292819	0.707181	0.472744	-21.4668	-17.4668	-17.2599	-17.3079	6.28806	4	61	0.000264705	11.8834	11.9734	12.003	12.0946	12.1637	-1.28964	-0.462094	-0.189811	0.65259	1.28895	-0.280304	-0.190347	-0.160748	-0.0691756	-1.21445	-1.14104	-1.11787	-1.04912	-4.6106	-2.92685	-1.91031	-0.988274	2.10397e-05	0.00480548	0.0607968	0.326922	4.67696	2.31826	1.21612	0.485555	0.000344596	0.0357315	0.281781
hsa-miR-30e-3p	296	0.00674947	0.0439959	0.0507454	0.0517415	0.133006	0.866994	0.252229	0.671428	4.67143	4.87832	4.83031	1.46678	4	61	0.223341	7.88726	8.02556	8.00517	7.88165	7.88252	-0.678692	1.23027	0.948791	-0.756173	-0.744191	0.00474519	0.143044	0.122652	-0.000868108	1.00329	1.10423	1.08873	-1.0006	0.0629061	1.78286	1.17478	-0.01	0.950047	0.0795856	0.24465	0.992054	0.0222549	1.09917	0.611455	0.00346474	0.975148	0.346743	0.749724
hsa-miR-30e-5p	297	0.00891669	0.051252	0.0601687	0.0960317	0.148195	0.851805	0.532426	10.4799	14.4799	14.6868	14.6388	13.1572	4	61	8.70744e-08	11.7538	11.78	12.3585	12.1586	11.8219	-0.818259	-0.72104	1.4231	0.682039	-0.565837	-0.0681078	-0.0418766	0.536649	0.336699	-1.04834	-1.02945	1.4506	1.26286	-0.83612	-0.482944	4.76001	3.59151	0.406351	0.630865	1.23119e-05	0.000656919	0.391099	0.200064	4.90968	3.18249	0.772746	0.929402	0.000221067
hsa-miR-3120-3p	298	0.00259436	0.204701	0.207295	0.199342	0.0125153	0.987485	0.0464596	89.5494	93.5494	93.7563	93.7083	0.419155	4	61	0.794197	2.9747	3.08994	3.12503	2.91538	2.95157	-0.401869	0.862556	1.2476	-1.05272	-0.655571	0.0231227	0.138364	0.173458	-0.0361966	1.01616	1.10066	1.12776	-1.02541	0.143218	0.815652	0.775719	-0.194948	0.88659	0.417873	0.440912	0.846082	0.0522772	0.378956	0.355648	0.0725877	0.945978	0.772746	0.772746
hsa-miR-3122	299	0.0395301	0.105541	0.145071	0.13976	0.272488	0.727512	0.35206	58.1207	62.1207	62.3276	62.2796	0.663593	4	61	0.619694	3.51808	3.54926	3.51016	3.41101	3.62599	-0.0622321	0.34015	-0.164349	-1.44368	1.33011	-0.107909	-0.0767241	-0.115824	-0.214975	-1.07767	-1.05462	-1.08359	-1.16068	-0.920679	-0.612233	-0.713971	-1.59313	0.360845	0.542659	0.477968	0.116301	0.442679	0.265473	0.320601	0.934416	0.772746	0.859181	0.800503
hsa-miR-3128	300	0.0103546	0.395676	0.40603	0.567263	0.0255021	0.974498	0.358362	130.404	134.404	134.61	134.562	7.85937	4	61	3.54863e-05	3.11537	3.12965	4.4685	3.67583	2.94855	-0.565284	-0.542366	1.60644	0.334235	-0.833025	0.16682	0.181099	1.51995	0.727279	1.12258	1.13375	2.8678	1.65551	0.742133	0.765113	4.88311	2.8131	0.460855	0.447155	7.8784e-06	0.00659325	0.336436	0.349542	5.10356	2.1809	0.781744	0.773256	0.000154222
hsa-miR-3135b	301	0.0334365	0.119708	0.153144	0.166805	0.218334	0.781666	0.379676	64.3292	68.3292	68.5361	68.4881	3.85685	4	61	0.007382	3.55195	3.25581	3.32585	3.29462	3.07891	1.47751	-0.269037	0.144021	-0.0401533	-1.31234	0.47304	0.1769	0.246937	0.215709	1.38803	1.13045	1.18669	1.16127	3.79318	1.32874	1.43066	1.5026	0.000343884	0.188882	0.157631	0.138103	3.46359	0.72381	0.802359	0.859797	0.00356228	0.638563	0.568596
hsa-miR-3140-3p	302	0	0.184894	0.184894	0.178764	0	1	0.0293612	82.667	84.667	84.7348	84.7465	0.461303	4	61	0.763811	3.03299	3.10886	3.12112	2.92564	2.95514	0.0481228	0.909713	1.04898	-1.17089	-0.835921	0.0778472	0.153717	0.165981	-0.0294968	1.05544	1.11243	1.12193	-1.02066	0.508173	0.957401	0.782108	-0.167447	0.613165	0.342144	0.437177	0.867572	0.212423	0.465791	0.359343	0.0616943	0.912407	0.772746	0.772746
hsa-miR-3141	303	0.0266109	0.285162	0.311772	0.481965	0.0853535	0.914647	0.471842	112.985	116.985	117.191	117.143	11.7813	4	61	3.74048e-07	4.12563	3.11396	3.13368	3.10134	3.17233	1.78561	-0.483109	-0.438883	-0.511407	-0.352209	0.953302	-0.0583712	-0.0386498	-0.0709896	1.9363	-1.04129	-1.02715	-1.05044	4.97409	-0.287283	-0.145692	-0.321931	5.64894e-06	0.77487	0.884645	0.748605	5.24803	0.110771	0.0532311	0.125747	0.000117035	0.945978	0.945978
hsa-miR-3146	304	0.00765771	0.133488	0.141146	0.140508	0.054254	0.945746	0.140457	65.4295	69.4295	69.6364	69.5884	0.984793	4	61	0.422635	3.02566	3.1225	3.28726	3.00483	3.18859	-0.856165	-0.0279769	1.38119	-1.03433	0.537281	-0.162927	-0.0660921	0.098673	-0.183759	-1.11956	-1.04688	1.07079	-1.13584	-1.24487	-0.477761	0.544595	-1.22051	0.217942	0.634528	0.588017	0.226968	0.661659	0.197549	0.23061	0.644035	0.704381	0.931615	0.89252
hsa-miR-3149	305	0.00587078	0.211608	0.217479	0.207169	0.0269947	0.973005	0.0613338	92.2984	96.2984	96.5053	96.4573	0.32385	4	61	0.860927	2.97439	3.09502	3.1306	2.99647	2.94747	-0.683082	0.831651	1.27842	-0.40587	-1.02112	0.0269196	0.147546	0.183125	0.0489955	1.01883	1.10768	1.13534	1.03454	0.163735	0.852073	0.804382	0.259104	0.870481	0.397506	0.4243	0.796427	0.0602407	0.400656	0.372327	0.0988539	0.945978	0.772746	0.772746
hsa-miR-3158-3p	306	0	0.12126	0.12126	0.115928	0	1	0.0183786	56.9344	58.9344	59.0022	59.0139	0.285522	4	61	0.886277	3.09664	3.0852	3.12112	2.99732	3.0073	0.630619	0.425247	1.07021	-1.15259	-0.973487	0.0893388	0.0779008	0.113821	-0.00997478	1.06388	1.05548	1.08209	-1.00694	0.72013	0.599123	0.66227	-0.0699209	0.474195	0.55131	0.510293	0.944485	0.324043	0.258604	0.292181	0.0248048	0.796017	0.864794	0.827989
hsa-miR-31-5p	307	0	0.220302	0.220302	0.221366	0	1	0.06605	93.3553	95.3553	95.4231	95.4347	1.0785	4	61	0.37505	3.01751	3.22573	3.34336	2.99524	3.01788	-0.655874	0.677368	1.43051	-0.798478	-0.653521	-0.000367577	0.207857	0.325481	-0.0226393	-1.00025	1.15497	1.25308	-1.01582	-0.00219821	1.18601	1.40504	-0.117738	0.998253	0.240218	0.165083	0.906662	0.000759263	0.619395	0.782298	0.0425546	0.998723	0.742714	0.58503
hsa-miR-3160-3p	308	0.00259436	0.204701	0.207295	0.199342	0.0125153	0.987485	0.0464596	89.5494	93.5494	93.7563	93.7083	0.419155	4	61	0.794197	2.9747	3.08994	3.12503	2.91538	2.95157	-0.401869	0.862556	1.2476	-1.05272	-0.655571	0.0231227	0.138364	0.173458	-0.0361966	1.01616	1.10066	1.12776	-1.02541	0.143218	0.815652	0.775719	-0.194948	0.88659	0.417873	0.440912	0.846082	0.0522772	0.378956	0.355648	0.0725877	0.945978	0.772746	0.772746
hsa-miR-3173-3p	309	0.00259436	0.204701	0.207295	0.199342	0.0125153	0.987485	0.0464596	89.5494	93.5494	93.7563	93.7083	0.419155	4	61	0.794197	2.9747	3.08994	3.12503	2.91538	2.95157	-0.401869	0.862556	1.2476	-1.05272	-0.655571	0.0231227	0.138364	0.173458	-0.0361966	1.01616	1.10066	1.12776	-1.02541	0.143218	0.815652	0.775719	-0.194948	0.88659	0.417873	0.440912	0.846082	0.0522772	0.378956	0.355648	0.0725877	0.945978	0.772746	0.772746
hsa-miR-3173-5p	310	0	0.15523	0.15523	0.152788	0	1	0.0465403	71.9996	73.9996	74.0673	74.079	0.744384	4	61	0.565514	3.21273	3.16996	3.12112	3.04341	3.00014	1.17724	0.689588	0.132797	-0.753131	-1.24649	0.212596	0.169822	0.120983	0.0432748	1.15877	1.12492	1.08748	1.03045	1.5146	1.15436	0.62217	0.268108	0.135039	0.252857	0.536149	0.789521	0.869541	0.597125	0.270715	0.102636	0.508032	0.768077	0.853332
hsa-miR-3174	311	0.00259436	0.204701	0.207295	0.199342	0.0125153	0.987485	0.0464596	89.5494	93.5494	93.7563	93.7083	0.419155	4	61	0.794197	2.9747	3.08994	3.12503	2.91538	2.95157	-0.401869	0.862556	1.2476	-1.05272	-0.655571	0.0231227	0.138364	0.173458	-0.0361966	1.01616	1.10066	1.12776	-1.02541	0.143218	0.815652	0.775719	-0.194948	0.88659	0.417873	0.440912	0.846082	0.0522772	0.378956	0.355648	0.0725877	0.945978	0.772746	0.772746
hsa-miR-3199	312	0.00231821	0.195481	0.197799	0.190229	0.01172	0.98828	0.0451928	86.6966	90.6966	90.9035	90.8555	0.417406	4	61	0.795452	2.99364	3.08956	3.12466	2.91539	2.95169	-0.238745	0.834108	1.22672	-1.11404	-0.708047	0.0419568	0.137872	0.172973	-0.0362968	1.02951	1.10028	1.12738	-1.02548	0.265956	0.8319	0.791649	-0.200065	0.79117	0.40871	0.431633	0.842095	0.10173	0.388585	0.364885	0.0746387	0.945978	0.772746	0.772746
hsa-miR-3200-3p	313	0.302555	0.0914553	0.39401	0.336137	0.767886	0.232114	0.772881	62.85	66.85	67.0569	67.0088	2.93579	4	61	0.0275735	5.73297	5.817	5.33631	5.61764	5.71199	0.483704	0.936378	-1.65315	-0.137601	0.370666	0.0209831	0.105013	-0.375679	-0.0943492	1.01465	1.0755	-1.29745	-1.06758	0.191679	0.892187	-2.47892	-0.748244	0.84863	0.375799	0.0159584	0.457188	0.0712815	0.425045	1.79701	0.339905	0.945978	0.772746	0.0971936
hsa-miR-3200-5p	314	0.00259436	0.204701	0.207295	0.199342	0.0125153	0.987485	0.0464596	89.5494	93.5494	93.7563	93.7083	0.419155	4	61	0.794197	2.9747	3.08994	3.12503	2.91538	2.95157	-0.401869	0.862556	1.2476	-1.05272	-0.655571	0.0231227	0.138364	0.173458	-0.0361966	1.01616	1.10066	1.12776	-1.02541	0.143218	0.815652	0.775719	-0.194948	0.88659	0.417873	0.440912	0.846082	0.0522772	0.378956	0.355648	0.0725877	0.945978	0.772746	0.772746
hsa-miR-3202	315	0	0.173769	0.173769	0.166465	0	1	0.0203611	78.8818	80.8818	80.9496	80.9612	0.316961	4	61	0.865566	3.05331	3.0852	3.12112	2.95727	2.96572	0.231117	0.670163	1.16471	-1.09113	-0.974863	0.0875938	0.119483	0.155403	-0.00844465	1.0626	1.08635	1.11373	-1.00587	0.589816	0.76763	0.755343	-0.049449	0.557493	0.445668	0.45295	0.960723	0.253761	0.350988	0.34395	0.0174018	0.872409	0.772746	0.775937
hsa-miR-320a	316	0.0420712	0.140013	0.182084	0.258386	0.231054	0.768946	0.532514	74.2423	78.2423	78.4492	78.4012	10.6112	4	61	1.36383e-06	10.3626	10.2566	9.32959	9.93495	10.3354	0.734278	0.490075	-1.64519	-0.250813	0.671648	0.0271901	-0.0788285	-1.00583	-0.400479	1.01903	-1.05616	-2.00811	-1.31995	0.201552	-0.547133	-5.38699	-2.57876	0.840938	0.586284	1.21652e-06	0.0123439	0.0752362	0.231892	5.91488	1.90855	0.945978	0.891004	2.97864e-05
hsa-miR-320b	317	0.0330135	0.163155	0.196169	0.275484	0.168291	0.831709	0.483443	81.7462	85.7462	85.953	85.905	9.79562	4	61	3.46716e-06	6.05392	5.92769	5.03101	5.47812	5.9443	0.857278	0.562352	-1.53272	-0.488063	0.601157	0.109618	-0.0166084	-0.913287	-0.466179	1.07894	-1.01158	-1.88333	-1.38145	0.753798	-0.107186	-4.53761	-2.78521	0.45387	0.914993	2.72666e-05	0.00711644	0.343068	0.0385822	4.56437	2.14774	0.776416	0.960096	0.000432651
hsa-miR-320c	318	0.0542087	0.0914772	0.145686	0.137905	0.372093	0.627907	0.436321	51.9242	55.9242	56.1311	56.0831	1.11677	4	61	0.356919	4.58287	4.5658	4.5978	4.374	4.60229	0.397448	0.220385	0.55237	-1.76909	0.598888	-0.0194203	-0.0364904	-0.0044847	-0.22829	-1.01355	-1.02562	-1.00311	-1.17145	-0.177762	-0.311769	-0.029657	-1.81473	0.859499	0.756279	0.976437	0.0744836	0.0657546	0.121318	0.0103556	1.12794	0.945978	0.945978	0.988673
hsa-miR-320d	319	0	0.110273	0.110273	0.106645	0	1	0.0296054	51.1411	53.1411	53.2089	53.2205	0.465257	4	61	0.76095	3.24424	3.14402	3.12112	3.09709	3.13644	1.69605	-0.0808993	-0.486919	-0.912928	-0.215299	0.107796	0.0075799	-0.0153188	-0.0393449	1.07758	1.00527	-1.01067	-1.02765	0.911166	0.0611309	-0.0934676	-0.289211	0.365795	0.951455	0.925838	0.7734	0.436763	0.0216118	0.0334648	0.111596	0.772746	0.975356	0.964976
hsa-miR-320e	320	0.00259436	0.204701	0.207295	0.199342	0.0125153	0.987485	0.0464596	89.5494	93.5494	93.7563	93.7083	0.419155	4	61	0.794197	2.9747	3.08994	3.12503	2.91538	2.95157	-0.401869	0.862556	1.2476	-1.05272	-0.655571	0.0231227	0.138364	0.173458	-0.0361966	1.01616	1.10066	1.12776	-1.02541	0.143218	0.815652	0.775719	-0.194948	0.88659	0.417873	0.440912	0.846082	0.0522772	0.378956	0.355648	0.0725877	0.945978	0.772746	0.772746
hsa-miR-323a-3p	321	0.00259436	0.204701	0.207295	0.199342	0.0125153	0.987485	0.0464596	89.5494	93.5494	93.7563	93.7083	0.419155	4	61	0.794197	2.9747	3.08994	3.12503	2.91538	2.95157	-0.401869	0.862556	1.2476	-1.05272	-0.655571	0.0231227	0.138364	0.173458	-0.0361966	1.01616	1.10066	1.12776	-1.02541	0.143218	0.815652	0.775719	-0.194948	0.88659	0.417873	0.440912	0.846082	0.0522772	0.378956	0.355648	0.0725877	0.945978	0.772746	0.772746
hsa-miR-323b-3p	322	0	0.173818	0.173818	0.168578	0	1	0.0323669	78.899	80.899	80.9668	80.9785	0.510106	4	61	0.728478	3.03198	3.11554	3.12112	2.91314	2.97629	0.00410518	0.936087	0.99834	-1.32147	-0.617066	0.0556899	0.139245	0.144826	-0.0631516	1.03936	1.10133	1.1056	-1.04475	0.374937	0.894467	0.703833	-0.369742	0.709008	0.374588	0.484215	0.712855	0.149349	0.426446	0.314962	0.146999	0.945978	0.772746	0.806692
hsa-miR-32-3p	323	0.00270579	0.200452	0.203158	0.194994	0.0133186	0.986681	0.046028	88.3116	92.3116	92.5184	92.4704	0.391818	4	61	0.81371	2.98168	3.09008	3.12516	2.928	2.95127	-0.38426	0.856925	1.25856	-0.998828	-0.732394	0.0304055	0.138809	0.173886	-0.0232699	1.0213	1.101	1.12809	-1.01626	0.190294	0.8267	0.785771	-0.126636	0.849711	0.411629	0.435043	0.899645	0.0707289	0.385494	0.361467	0.0459287	0.945978	0.772746	0.772746
hsa-miR-324-3p	324	0.00566938	0.129506	0.135175	0.152623	0.0419409	0.958059	0.227281	63.0426	67.0426	67.2495	67.2015	3.43175	4	61	0.0135274	3.55728	3.7423	3.32034	3.54058	3.88328	-0.240205	0.62319	-1.34592	-0.318158	1.2811	-0.326001	-0.140983	-0.562945	-0.342705	-1.25353	-1.10266	-1.47728	-1.26813	-2.53123	-1.03717	-3.15709	-2.31331	0.01396	0.303749	0.00247689	0.0240925	1.85511	0.517486	2.60609	1.61812	0.087666	0.772746	0.0201476
hsa-miR-324-5p	325	0.0026859	0.0745594	0.0772453	0.123831	0.0347711	0.965229	0.449394	29.0348	33.0348	33.2417	33.1937	11.3586	4	61	5.93356e-07	5.9552	6.24825	5.6204	5.77706	6.28321	-0.0747239	0.937978	-1.2317	-0.69032	1.05877	-0.328005	-0.0349531	-0.662806	-0.506144	-1.25528	-1.02452	-1.58316	-1.42025	-3.35856	-0.339426	-4.9016	-4.50575	0.00135448	0.735455	7.36461e-06	3.0517e-05	2.86823	0.133444	5.13285	4.51546	0.0119392	0.945978	0.000148765
hsa-miR-32-5p	326	0.168238	0.233751	0.401988	0.48352	0.418514	0.581486	0.590562	110.291	114.291	114.498	114.45	10.8129	4	61	1.0872e-06	9.22155	8.7076	9.54874	9.37134	8.39323	0.3589	-0.706975	1.03746	0.669559	-1.35895	0.828315	0.314369	1.15551	0.978109	1.77561	1.24347	2.22762	1.96988	4.74111	1.67841	4.77813	4.86169	1.31804e-05	0.0983829	1.1532e-05	8.51757e-06	4.88007	1.00708	4.9381	5.06968	0.000231517	0.409057	0.000211769
hsa-miR-326	327	0.00962943	0.127845	0.137474	0.143618	0.0700452	0.929955	0.200469	63.4489	67.4489	67.6558	67.6078	1.89078	4	61	0.123517	3.30148	3.34017	3.14166	3.01263	3.13154	0.863943	1.15213	-0.326505	-1.28766	-0.401902	0.169939	0.208628	0.010122	-0.118913	1.12501	1.15559	1.00704	-1.08592	1.32542	1.53692	0.0570306	-0.806141	0.189975	0.129483	0.954707	0.423293	0.721304	0.887786	0.0201298	0.373359	0.640471	0.493552	0.976048
hsa-miR-328-3p	328	0	0.181855	0.181855	0.177516	0	1	0.0385968	81.6562	83.6562	83.724	83.7356	0.612231	4	61	0.655419	3.13643	3.0852	3.12112	2.91314	2.99248	0.916993	0.375473	0.755132	-1.44308	-0.604522	0.143954	0.0927196	0.12864	-0.0793377	1.10493	1.06638	1.09326	-1.05653	0.947525	0.582293	0.611201	-0.454129	0.34711	0.562516	0.543338	0.651348	0.459533	0.249865	0.26493	0.186187	0.772746	0.87478	0.859694
hsa-miR-329-3p	329	0.00259436	0.204701	0.207295	0.199342	0.0125153	0.987485	0.0464596	89.5494	93.5494	93.7563	93.7083	0.419155	4	61	0.794197	2.9747	3.08994	3.12503	2.91538	2.95157	-0.401869	0.862556	1.2476	-1.05272	-0.655571	0.0231227	0.138364	0.173458	-0.0361966	1.01616	1.10066	1.12776	-1.02541	0.143218	0.815652	0.775719	-0.194948	0.88659	0.417873	0.440912	0.846082	0.0522772	0.378956	0.355648	0.0725877	0.945978	0.772746	0.772746
hsa-miR-330-3p	330	0.00259436	0.204701	0.207295	0.199342	0.0125153	0.987485	0.0464596	89.5494	93.5494	93.7563	93.7083	0.419155	4	61	0.794197	2.9747	3.08994	3.12503	2.91538	2.95157	-0.401869	0.862556	1.2476	-1.05272	-0.655571	0.0231227	0.138364	0.173458	-0.0361966	1.01616	1.10066	1.12776	-1.02541	0.143218	0.815652	0.775719	-0.194948	0.88659	0.417873	0.440912	0.846082	0.0522772	0.378956	0.355648	0.0725877	0.945978	0.772746	0.772746
hsa-miR-330-5p	331	0.00259436	0.204701	0.207295	0.199342	0.0125153	0.987485	0.0464596	89.5494	93.5494	93.7563	93.7083	0.419155	4	61	0.794197	2.9747	3.08994	3.12503	2.91538	2.95157	-0.401869	0.862556	1.2476	-1.05272	-0.655571	0.0231227	0.138364	0.173458	-0.0361966	1.01616	1.10066	1.12776	-1.02541	0.143218	0.815652	0.775719	-0.194948	0.88659	0.417873	0.440912	0.846082	0.0522772	0.378956	0.355648	0.0725877	0.945978	0.772746	0.772746
hsa-miR-331-3p	332	0.0857929	0.384297	0.47009	0.722615	0.182503	0.817497	0.537459	134.437	138.437	138.644	138.596	13.9168	4	61	4.00362e-08	6.68355	5.20115	5.30006	5.80771	6.13576	1.40155	-1.02023	-0.858642	-0.0293115	0.506635	0.547787	-0.934612	-0.835703	-0.328059	1.46184	-1.91138	-1.78473	-1.25532	2.45353	-3.92633	-2.70445	-1.27657	0.0170185	0.000222081	0.00885479	0.206593	1.76908	3.65349	2.05282	0.684885	0.102364	0.00248076	0.0599554
hsa-miR-331-5p	333	0.0481861	0.0673861	0.115572	0.122175	0.416935	0.583065	0.532821	34.3796	38.3796	38.5865	38.5385	4.46741	4	61	0.00312615	4.73296	4.7228	4.52576	4.50349	4.9171	0.308772	0.249084	-0.908995	-1.03989	1.39103	-0.184143	-0.194298	-0.391341	-0.413613	-1.13614	-1.14417	-1.31161	-1.33202	-1.96307	-1.93212	-3.01397	-3.82906	0.0542021	0.0579925	0.00375274	0.000305896	1.26598	1.23663	2.42565	3.51443	0.258851	0.271378	0.0287869
hsa-miR-335-3p	334	0.0241619	0.198152	0.222314	0.209128	0.108684	0.891316	0.160925	91.6371	95.6371	95.844	95.7959	0.382872	4	61	0.820046	3.046	3.13404	3.1749	2.99236	2.97614	-0.214438	0.795785	1.2647	-0.829967	-1.01608	0.069862	0.157901	0.198767	0.0162197	1.04962	1.11566	1.14772	1.01131	0.436812	0.929614	0.897893	0.0881316	0.66379	0.356235	0.372773	0.930061	0.177969	0.448263	0.428556	0.0314887	0.945978	0.772746	0.772746
hsa-miR-335-5p	335	0.324296	0.293368	0.617664	0.825241	0.525036	0.474964	0.700718	126.776	130.776	130.983	130.935	16.1286	4	61	4.61872e-09	3.47973	3.53928	4.69831	4.67454	3.31691	-0.674786	-0.587814	1.10495	1.07024	-0.912587	0.162821	0.22237	1.3814	1.35763	1.11947	1.16665	2.60521	2.56264	0.831287	1.05771	5.09493	6.01854	0.409054	0.294359	3.61936e-06	1.08789e-07	0.38822	0.531122	5.44137	6.96342	0.772746	0.772746	7.97574e-05
hsa-miR-337-3p	336	0.00259436	0.204701	0.207295	0.199342	0.0125153	0.987485	0.0464596	89.5494	93.5494	93.7563	93.7083	0.419155	4	61	0.794197	2.9747	3.08994	3.12503	2.91538	2.95157	-0.401869	0.862556	1.2476	-1.05272	-0.655571	0.0231227	0.138364	0.173458	-0.0361966	1.01616	1.10066	1.12776	-1.02541	0.143218	0.815652	0.775719	-0.194948	0.88659	0.417873	0.440912	0.846082	0.0522772	0.378956	0.355648	0.0725877	0.945978	0.772746	0.772746
hsa-miR-337-5p	337	0	0.17739	0.17739	0.17503	0	1	0.0488824	80.1399	82.1399	82.2077	82.2193	0.78377	4	61	0.540135	3.13066	3.1392	3.25096	2.96977	2.97537	0.312433	0.383609	1.3156	-1.02917	-0.982469	0.155287	0.163823	0.275589	-0.00560055	1.11364	1.12025	1.21049	-1.00389	1.03491	1.0417	1.32577	-0.0324585	0.304799	0.301662	0.189861	0.974212	0.515987	0.520479	0.721565	0.0113463	0.772746	0.772746	0.640471
hsa-miR-338-3p	338	0.289775	0.44257	0.732344	0.910447	0.395681	0.604319	0.587653	148.671	152.671	152.878	152.83	11.6386	4	61	4.36766e-07	5.31463	4.50176	5.21017	4.65527	3.75883	1.00177	-0.298009	0.834743	-0.0525414	-1.48596	1.5558	0.742932	1.45134	0.896444	2.93996	1.67357	2.73462	1.86147	6.47302	2.88414	4.36244	3.23895	1.8491e-08	0.00541618	5.04337e-05	0.0019432	7.73304	2.26631	4.29728	2.71148	7.72798e-07	0.0394259	0.00071492
hsa-miR-339-3p	339	0.0822083	0.0591205	0.141329	0.137303	0.581681	0.418319	0.638399	30.5191	34.5191	34.726	34.678	3.32397	4	61	0.0157851	7.84204	7.97974	7.91334	7.99803	8.15678	-1.159	0.0149814	-0.551139	0.170836	1.52432	-0.314736	-0.177036	-0.243438	-0.158755	-1.24378	-1.13056	-1.18381	-1.11632	-3.57846	-1.87431	-1.99943	-1.5672	0.000684591	0.0656783	0.0500213	0.12224	3.16457	1.18258	1.30085	0.912785	0.00658512	0.297578	0.244459
hsa-miR-339-5p	340	0.0801517	0.0455401	0.125692	0.160858	0.637684	0.362316	0.762747	16.1243	20.1243	20.3312	20.2832	18.3296	4	61	6.18194e-10	10.6196	10.941	10.4997	10.5656	11.1265	-0.484391	0.705253	-0.928445	-0.684388	1.39197	-0.506894	-0.185515	-0.626853	-0.560922	-1.42099	-1.13722	-1.54419	-1.47521	-6.56491	-2.23635	-5.8646	-6.30735	1.28904e-08	0.0289964	1.97134e-07	3.53689e-08	7.88973	1.53766	6.70524	7.45138	6.24927e-07	0.156194	5.68873e-06
hsa-miR-33a-5p	341	0.149052	0.442081	0.591134	0.57152	0.252146	0.747854	0.334624	144.954	148.954	149.161	149.113	1.62125	4	61	0.180397	4.4758	4.27052	5.07621	4.51962	4.39185	-0.228432	-0.888925	1.70336	-0.0874361	-0.498563	0.083957	-0.121325	0.68436	0.127779	1.05992	-1.08773	1.60699	1.09261	0.35011	-0.473441	2.06192	0.46285	0.727462	0.637589	0.0434829	0.645119	0.13819	0.195459	1.36168	0.19036	0.945978	0.934411	0.218677
hsa-miR-33b-5p	342	0	0.186063	0.186063	0.179332	0	1	0.0263142	83.0515	85.0515	85.1193	85.131	0.412136	4	61	0.799227	3.01339	3.0852	3.12112	2.91314	2.95514	-0.0485417	0.779091	1.19306	-1.20381	-0.719804	0.0582459	0.13006	0.165981	-0.0419972	1.0412	1.09434	1.12193	-1.02954	0.379023	0.807508	0.779647	-0.237658	0.705987	0.422511	0.438614	0.812943	0.151203	0.374162	0.357918	0.08994	0.945978	0.772746	0.772746
hsa-miR-340-3p	343	0.0133944	0.134252	0.147647	0.167005	0.0907193	0.909281	0.283817	67.234	71.234	71.4409	71.3928	3.64752	4	61	0.00994065	3.61586	3.27742	3.2095	3.22156	3.22291	1.7682	-0.184857	-0.576763	-0.507169	-0.499413	0.392954	0.0545094	-0.0134038	-0.00134404	1.31308	1.03851	-1.00933	-1.00093	2.98739	0.390714	-0.0736191	-0.00888045	0.0040487	0.69737	0.941554	0.992943	2.39268	0.156537	0.0261546	0.00307546	0.0306689	0.945978	0.971138
hsa-miR-340-5p	344	0.0960293	0.103998	0.200028	0.275775	0.480081	0.519919	0.68179	62.3967	66.3967	66.6036	66.5555	18.9546	4	61	3.57304e-10	8.49995	8.19226	9.00294	8.87428	7.95174	-0.00964124	-0.702787	1.12343	0.833597	-1.2446	0.548212	0.240516	1.0512	0.922535	1.46227	1.18142	2.07225	1.89544	4.7022	1.92285	6.51366	6.87104	1.51604e-05	0.059171	1.57654e-08	3.85796e-09	4.81929	1.22789	7.80229	8.41364	0.000262491	0.275828	7.06399e-07
hsa-miR-342-3p	345	0.132786	0.290259	0.423045	0.433736	0.313882	0.686118	0.428389	120.904	124.904	125.111	125.063	2.84776	4	61	0.0313005	6.64633	6.77047	7.11855	6.53332	7.14098	-0.708868	-0.258965	1.00249	-1.11843	1.08378	-0.494649	-0.370506	-0.0224313	-0.607661	-1.40898	-1.29281	-1.01567	-1.52379	-2.54343	-1.78012	-0.08333	-2.71371	0.0135281	0.080037	0.933862	0.00863732	1.86876	1.09671	0.0297173	2.06362	0.0854499	0.347687	0.967385
hsa-miR-342-5p	346	0.00542204	0.190091	0.195513	0.187712	0.0277323	0.972268	0.069829	85.7927	89.7927	89.9996	89.9516	0.415398	4	61	0.796891	2.97581	3.09336	3.13038	2.91724	3.03785	-0.638553	0.723336	1.15223	-1.31719	0.0801738	-0.0620352	0.0555131	0.0925319	-0.12061	-1.04394	1.03923	1.06624	-1.08719	-0.398076	0.338181	0.42881	-0.672903	0.691964	0.736388	0.669572	0.50355	0.159917	0.132893	0.174203	0.297957	0.945978	0.945978	0.945978
hsa-miR-34a-5p	347	0.560031	0.27232	0.832351	0.883642	0.672831	0.327169	0.742039	126.237	130.237	130.444	130.396	10.064	4	61	2.54291e-06	6.57595	6.00455	6.60582	6.7601	5.64564	0.544407	-0.663476	0.607549	0.933682	-1.42216	0.930307	0.358904	0.960177	1.11446	1.90568	1.28245	1.94555	2.16514	4.92646	1.76862	3.67295	5.12384	6.72537e-06	0.0819571	0.000506959	3.25197e-06	5.17228	1.08641	3.29503	5.48785	0.000137195	0.355124	0.0049954
hsa-miR-3613-3p	348	0	0.0938815	0.0938815	0.101037	0	1	0.127996	41.3244	43.3244	43.3922	43.4039	2.23846	4	61	0.0752225	3.22765	3.18573	3.43829	3.45969	3.17091	-0.487982	-0.785327	1.00598	1.15772	-0.890397	0.0567387	0.0148144	0.267381	0.288776	1.04011	1.01032	1.20362	1.2216	0.519779	0.129487	1.76812	2.30056	0.605099	0.897398	0.0820419	0.0248503	0.218174	0.0470148	1.08596	1.60467	0.908773	0.950944	0.355124
hsa-miR-3613-5p	349	0.000647161	0.232429	0.233076	0.244522	0.00277661	0.997223	0.110177	96.7779	100.778	100.985	100.937	1.79354	4	61	0.141709	7.83765	8.11145	7.75095	7.8222	7.65189	0.0165085	1.61611	-0.490053	-0.0737598	-1.0688	0.185766	0.459559	0.0990609	0.170315	1.13742	1.37512	1.07108	1.1253	1.08114	2.55037	0.416185	0.86197	0.283891	0.0132875	0.678735	0.39208	0.546848	1.87656	0.168299	0.406626	0.772746	0.0843165	0.945978
hsa-miR-361-3p	350	0.0178866	0.0489054	0.066792	0.0822526	0.267795	0.732205	0.489555	11.0747	15.0747	15.2816	15.2336	6.55058	4	61	0.000187735	7.8113	7.44799	7.73606	7.56282	7.74292	1.00755	-1.41527	0.505752	-0.64954	0.551513	0.0683843	-0.294928	-0.00686207	-0.180103	1.04854	-1.22682	-1.00477	-1.13297	0.857172	-3.45793	-0.0621445	-1.96088	0.394705	0.000998036	0.950651	0.0544626	0.403727	3.00085	0.0219789	1.2639	0.772746	0.00926912	0.975192
hsa-miR-361-5p	351	0.0425759	0.0290918	0.0716676	0.0744443	0.594074	0.405926	0.67198	-12.4086	-8.40859	-8.2017	-8.24971	8.91313	4	61	9.81109e-06	10.3835	10.2673	9.99344	10.1768	10.4235	0.779331	0.106331	-1.47862	-0.417394	1.01035	-0.0399131	-0.156187	-0.430019	-0.246671	-1.02805	-1.11434	-1.34725	-1.18647	-0.646879	-2.35691	-5.03457	-3.47113	0.520137	0.0216541	4.5228e-06	0.000957982	0.283882	1.66446	5.34459	3.01864	0.83645	0.123796	9.78864e-05
hsa-miR-362-3p	352	0.00169767	0.20685	0.208548	0.201724	0.00814044	0.99186	0.0444786	89.9562	93.9562	94.1631	94.1151	0.497888	4	61	0.73732	2.9748	3.08838	3.16757	2.91472	2.95269	-0.426967	0.65466	1.40879	-0.999041	-0.637446	0.0221019	0.135681	0.21487	-0.0379701	1.01544	1.09861	1.1606	-1.02667	0.136256	0.79675	0.956354	-0.203551	0.892068	0.428686	0.342669	0.839382	0.0496022	0.367861	0.465126	0.0760404	0.948825	0.772746	0.772746
hsa-miR-362-5p	353	0.0805175	0.137839	0.218357	0.217281	0.368743	0.631257	0.460772	76.8514	80.8514	81.0582	81.0102	2.37282	4	61	0.0620251	4.60425	4.64043	4.44675	4.55575	4.92226	-0.167509	0.0369736	-1.05775	-0.44165	1.62993	-0.31801	-0.281832	-0.475514	-0.366512	-1.24661	-1.21574	-1.39041	-1.28923	-2.37141	-1.96179	-2.56179	-2.37355	0.020893	0.0543543	0.0129005	0.020783	1.68	1.26477	1.88939	1.68229	0.12092	0.258851	0.0822915
hsa-miR-363-3p	354	0.270113	0.127958	0.398071	0.372956	0.678554	0.321446	0.712869	80.3378	84.3378	84.5447	84.4967	1.06288	4	61	0.382665	4.72289	4.94367	4.65838	4.74338	4.78496	-0.44655	1.61741	-1.04962	-0.254941	0.133693	-0.0620676	0.158711	-0.126576	-0.0415715	-1.04396	1.11629	-1.0917	-1.02923	-0.479479	1.14089	-0.706337	-0.278819	0.633312	0.258376	0.482668	0.781327	0.198382	0.587748	0.316352	0.107167	0.930783	0.772746	0.805221
hsa-miR-3656	355	0.00259436	0.204701	0.207295	0.199342	0.0125153	0.987485	0.0464596	89.5494	93.5494	93.7563	93.7083	0.419155	4	61	0.794197	2.9747	3.08994	3.12503	2.91538	2.95157	-0.401869	0.862556	1.2476	-1.05272	-0.655571	0.0231227	0.138364	0.173458	-0.0361966	1.01616	1.10066	1.12776	-1.02541	0.143218	0.815652	0.775719	-0.194948	0.88659	0.417873	0.440912	0.846082	0.0522772	0.378956	0.355648	0.0725877	0.945978	0.772746	0.772746
hsa-miR-3657	356	0.110702	0.128398	0.2391	0.225027	0.462995	0.537005	0.518076	74.8329	78.8329	79.0398	78.9918	0.371998	4	61	0.827705	3.41279	3.4811	3.34458	3.32247	3.37995	0.394997	1.49149	-0.699776	-1.05466	-0.132046	0.032837	0.101153	-0.0353721	-0.0574832	1.02302	1.07263	-1.02482	-1.04065	0.253514	0.72803	-0.197283	-0.385365	0.800724	0.46938	0.844262	0.701308	0.0965172	0.328475	0.0735228	0.154091	0.945978	0.791773	0.945978
hsa-miR-365a-3p	357	0.00259436	0.204701	0.207295	0.199342	0.0125153	0.987485	0.0464596	89.5494	93.5494	93.7563	93.7083	0.419155	4	61	0.794197	2.9747	3.08994	3.12503	2.91538	2.95157	-0.401869	0.862556	1.2476	-1.05272	-0.655571	0.0231227	0.138364	0.173458	-0.0361966	1.01616	1.10066	1.12776	-1.02541	0.143218	0.815652	0.775719	-0.194948	0.88659	0.417873	0.440912	0.846082	0.0522772	0.378956	0.355648	0.0725877	0.945978	0.772746	0.772746
hsa-miR-3688-5p	358	0.00936376	0.176323	0.185687	0.177131	0.0504277	0.949572	0.0976364	82.2415	86.2415	86.4484	86.4004	0.393621	4	61	0.81243	3.10414	3.22045	3.22055	3.04126	3.11359	-0.456346	1.02399	1.02517	-1.25668	-0.336126	-0.00944596	0.106867	0.10696	-0.0723301	-1.00657	1.07689	1.07696	-1.05141	-0.0628151	0.672638	0.513774	-0.41813	0.950119	0.503718	0.609266	0.677321	0.0222219	0.297813	0.215193	0.169206	0.975148	0.823339	0.910609
hsa-miR-3692-5p	359	0.00259436	0.204701	0.207295	0.199342	0.0125153	0.987485	0.0464596	89.5494	93.5494	93.7563	93.7083	0.419155	4	61	0.794197	2.9747	3.08994	3.12503	2.91538	2.95157	-0.401869	0.862556	1.2476	-1.05272	-0.655571	0.0231227	0.138364	0.173458	-0.0361966	1.01616	1.10066	1.12776	-1.02541	0.143218	0.815652	0.775719	-0.194948	0.88659	0.417873	0.440912	0.846082	0.0522772	0.378956	0.355648	0.0725877	0.945978	0.772746	0.772746
hsa-miR-369-3p	360	0.223798	0.208652	0.432451	0.412957	0.517512	0.482488	0.574473	105.8	109.8	110.007	109.959	2.64929	4	61	0.0416609	3.53929	3.86224	3.62677	3.28107	3.5524	-0.158838	1.39258	0.261399	-1.39928	-0.0958619	-0.0131093	0.30984	0.0743691	-0.271325	-1.00913	1.23957	1.0529	-1.20692	-0.0793658	1.74772	0.325258	-1.42631	0.937001	0.0855446	0.746099	0.158876	0.0282597	1.06781	0.127203	0.798942	0.968981	0.36766	0.945978
hsa-miR-369-5p	361	0.0839853	0.106158	0.190143	0.222742	0.441695	0.558305	0.596952	62.7088	66.7088	66.9157	66.8677	6.7369	4	61	0.000147392	3.59464	3.69671	3.2365	3.10939	3.4323	0.742193	1.16138	-0.728531	-1.25056	0.0755222	0.16234	0.264414	-0.195794	-0.322912	1.1191	1.20115	-1.14535	-1.25085	1.37858	2.0938	-1.20116	-2.38119	0.17306	0.0404418	0.234332	0.0203937	0.761803	1.39317	0.630168	1.6905	0.60014	0.205516	0.732375
hsa-miR-370-3p	362	0.204065	0.246929	0.450994	0.686471	0.452478	0.547522	0.696	114.467	118.467	118.674	118.626	17.5092	4	61	1.28869e-09	4.43684	4.3866	3.19467	3.20827	4.27467	0.837732	0.759308	-1.10142	-1.08019	0.584569	0.16217	0.111933	-1.08	-1.0664	1.11897	1.08068	-2.11404	-2.0942	0.902882	0.581042	-4.34391	-5.15562	0.37014	0.563353	5.37908e-05	2.89034e-06	0.431634	0.24922	4.26929	5.53905	0.772746	0.874803	0.000749362
hsa-miR-371a-5p	363	0.00608545	0.197213	0.203298	0.196918	0.0299336	0.970066	0.0814032	88.1415	92.1415	92.3484	92.3003	0.618291	4	61	0.651159	2.9898	3.0984	3.25588	3.04148	2.94851	-0.643424	0.263913	1.57948	-0.211632	-0.988337	0.0412864	0.149895	0.30737	0.0929722	1.02903	1.10949	1.23745	1.06657	0.260049	0.896029	1.39819	0.509141	0.795701	0.37376	0.167118	0.612491	0.0992499	0.427407	0.776976	0.212901	0.945978	0.772746	0.589658
hsa-miR-372-3p	364	0.0886035	0.185196	0.2738	0.262111	0.323607	0.676393	0.397057	93.7398	97.7398	97.9467	97.8987	0.26922	4	61	0.896673	3.18206	3.28986	3.27251	3.23072	3.13532	-0.626349	1.06023	0.788821	0.134924	-1.35763	0.0467409	0.154541	0.137194	0.0953988	1.03293	1.11307	1.09976	1.06836	0.300846	0.929264	0.637977	0.533291	0.764555	0.356415	0.525876	0.59577	0.116591	0.448044	0.279116	0.224921	0.945978	0.772746	0.843072
hsa-miR-373-3p	365	0	0.182691	0.182691	0.175808	0	1	0.0248024	81.9358	83.9358	84.0036	84.0152	0.387856	4	61	0.81652	3.02863	3.0852	3.12112	2.92564	2.95514	0.0659834	0.746884	1.17923	-1.17356	-0.818533	0.0734886	0.13006	0.165981	-0.0294968	1.05226	1.09434	1.12193	-1.02066	0.482605	0.814927	0.78681	-0.168453	0.631104	0.418284	0.43444	0.866784	0.199899	0.378528	0.362071	0.0620892	0.929402	0.772746	0.772746
hsa-miR-374a-3p	366	0.114927	0.277501	0.392428	0.447111	0.292861	0.707139	0.468702	117.623	121.623	121.83	121.782	6.66915	4	61	0.000160916	4.38883	3.91071	4.45342	4.42576	3.57959	0.608441	-0.618158	0.774139	0.703197	-1.46762	0.809239	0.331116	0.873827	0.846174	1.75229	1.25799	1.83252	1.79773	4.25674	1.6282	3.32091	3.86596	7.27173e-05	0.108636	0.00151869	0.000271032	4.13836	0.964025	2.81853	3.56698	0.000952793	0.439791	0.0131008
hsa-miR-374a-5p	367	0.070557	0.0729933	0.14355	0.155701	0.491514	0.508486	0.604665	41.0847	45.0847	45.2916	45.2436	9.20384	4	61	6.93969e-06	9.51651	9.2151	9.66148	9.55149	9.07824	0.45465	-0.769457	1.04341	0.596713	-1.32532	0.438276	0.136868	0.583245	0.473256	1.35498	1.09952	1.49822	1.38824	4.48684	1.30583	4.3135	4.20698	3.26217e-05	0.196512	5.97756e-05	8.62652e-05	4.48649	0.706611	4.22348	4.06416	0.000485123	0.657936	0.000823273
hsa-miR-374b-3p	368	0.0071459	0.187092	0.194238	0.188268	0.0367895	0.963211	0.092341	85.2484	89.2484	89.4553	89.4073	0.622601	4	61	0.648137	2.97506	3.09654	3.21661	2.93104	2.98295	-0.564159	0.48405	1.52002	-0.94389	-0.49602	-0.00789733	0.113589	0.233658	-0.0519079	-1.00549	1.08192	1.17581	-1.03663	-0.0510388	0.696022	1.09065	-0.291654	0.959461	0.489059	0.279715	0.771541	0.0179725	0.310639	0.553284	0.112641	0.979669	0.809999	0.772746
hsa-miR-374b-5p	369	0.0486316	0.0859203	0.134552	0.125736	0.361434	0.638566	0.418812	47.8379	51.8379	52.0448	51.9968	1.53548	4	61	0.203187	7.08335	6.99425	7.33286	7.1531	7.07946	-0.355447	-1.05531	1.60435	0.192431	-0.386027	0.0038932	-0.0852091	0.253404	0.0736461	1.0027	-1.06084	1.19202	1.05237	0.0367742	-0.7514	1.72928	0.604136	0.970785	0.455301	0.0888176	0.547994	0.0128769	0.341701	1.0515	0.261224	0.986106	0.777673	0.378372
hsa-miR-375	370	0.000855567	0.253806	0.254661	0.258747	0.00335963	0.99664	0.0822306	102.177	106.177	106.384	106.336	1.27916	4	61	0.288046	2.97493	3.08667	3.45943	2.98835	2.95385	-0.557156	-0.0282822	1.73597	-0.493622	-0.656908	0.021076	0.132818	0.505576	0.0344996	1.01472	1.09643	1.41969	1.0242	0.117372	0.705225	2.03253	0.167075	0.906951	0.483354	0.0464601	0.867864	0.0424161	0.315734	1.33292	0.0615484	0.955387	0.805812	0.229835
hsa-miR-376a-3p	371	0.074044	0.196525	0.270569	0.24524	0.27366	0.72634	0.312516	96.0748	100.075	100.282	100.234	0.334983	4	61	0.853362	3.35191	3.33248	3.32541	3.26793	3.18097	0.867378	0.587221	0.485304	-0.343176	-1.59673	0.170945	0.151509	0.144439	0.0869639	1.1258	1.11073	1.1053	1.06213	1.06881	0.885943	0.652471	0.472275	0.289369	0.379128	0.516549	0.638416	0.538548	0.421215	0.286889	0.194896	0.772746	0.772746	0.833046
hsa-miR-376b-3p	372	0	0.277112	0.277112	0.278255	0	1	0.0653929	107.35	109.35	109.418	109.43	1.06702	4	61	0.380635	2.97511	3.0852	3.44464	3.05591	2.95514	-0.64558	-0.0907194	1.72086	-0.238331	-0.746225	0.0199691	0.13006	0.489498	0.100772	1.01394	1.09434	1.40396	1.07235	0.106478	0.661682	1.88406	0.467278	0.915552	0.510667	0.0643254	0.641966	0.0383169	0.291862	1.19162	0.192488	0.960096	0.827998	0.293091
hsa-miR-376c-3p	373	0.208236	0.295027	0.503263	0.471475	0.413772	0.586228	0.469863	124.377	128.377	128.584	128.536	1.7882	4	61	0.142779	3.86481	3.88317	4.08748	4.14938	3.586	-0.22274	-0.139877	0.782045	1.06136	-1.48079	0.278802	0.297166	0.501477	0.563378	1.21319	1.22873	1.41566	1.47772	1.4205	1.41237	1.84587	2.49267	0.160552	0.162923	0.0697656	0.0154098	0.794383	0.788018	1.15636	1.8122	0.57401	0.578408	0.31144
hsa-miR-377-3p	374	0.00259436	0.204701	0.207295	0.199342	0.0125153	0.987485	0.0464596	89.5494	93.5494	93.7563	93.7083	0.419155	4	61	0.794197	2.9747	3.08994	3.12503	2.91538	2.95157	-0.401869	0.862556	1.2476	-1.05272	-0.655571	0.0231227	0.138364	0.173458	-0.0361966	1.01616	1.10066	1.12776	-1.02541	0.143218	0.815652	0.775719	-0.194948	0.88659	0.417873	0.440912	0.846082	0.0522772	0.378956	0.355648	0.0725877	0.945978	0.772746	0.772746
hsa-miR-378a-3p	375	0.0608296	0.0916984	0.152528	0.155711	0.398809	0.601191	0.500563	52.7282	56.7282	56.9351	56.887	3.97919	4	61	0.00620766	8.73084	8.83383	9.01635	9.16516	8.87136	-1.13681	-0.529095	0.547787	1.42582	-0.307707	-0.140518	-0.0375213	0.14499	0.293802	-1.1023	-1.02635	1.10572	1.22587	-1.28435	-0.31998	0.957408	2.33202	0.203877	0.750077	0.342141	0.0230177	0.690632	0.124894	0.465795	1.63794	0.676057	0.945978	0.772746
hsa-miR-378a-5p	376	0.033184	0.143778	0.176962	0.224698	0.187521	0.812479	0.444003	74.6146	78.6146	78.8215	78.7735	6.66893	4	61	0.000160961	4.70761	5.05213	4.56991	4.55508	5.18403	-0.368652	0.827959	-0.846938	-0.898463	1.28609	-0.476412	-0.1319	-0.614114	-0.628948	-1.39128	-1.09574	-1.53062	-1.54644	-3.48816	-0.905623	-3.2487	-4.00069	0.000908594	0.368698	0.00188739	0.000173398	3.04163	0.433329	2.72414	3.76096	0.0085686	0.772746	0.0158855
hsa-miR-378c	377	0.0408878	0.147833	0.188721	0.200628	0.216657	0.783343	0.362912	77.1548	81.1548	81.3617	81.3137	3.56699	4	61	0.0111502	6.49015	6.53394	6.91925	6.94736	6.63415	-0.998658	-0.795107	0.996158	1.12684	-0.329231	-0.143998	-0.100213	0.285099	0.31321	-1.10496	-1.07193	1.21849	1.24247	-1.03909	-0.677409	1.4864	1.96336	0.302866	0.500707	0.142323	0.0541673	0.51875	0.300416	0.846724	1.26626	0.772746	0.8206	0.525902
hsa-miR-378d	378	0.108997	0.210415	0.319412	0.332912	0.341242	0.658758	0.461514	101.971	105.971	106.178	106.13	4.60187	4	61	0.00259223	3.7927	3.62804	4.3901	4.16121	3.7001	-0.433313	-0.936732	1.39313	0.693331	-0.716417	0.0925992	-0.0720619	0.690003	0.461108	1.06629	-1.05122	1.61329	1.3766	0.559043	-0.406299	3.0096	2.4177	0.578179	0.685945	0.0038	0.0186218	0.237938	0.163711	2.42022	1.72998	0.886913	0.945978	0.028966
hsa-miR-378e	379	0.00259436	0.204701	0.207295	0.199342	0.0125153	0.987485	0.0464596	89.5494	93.5494	93.7563	93.7083	0.419155	4	61	0.794197	2.9747	3.08994	3.12503	2.91538	2.95157	-0.401869	0.862556	1.2476	-1.05272	-0.655571	0.0231227	0.138364	0.173458	-0.0361966	1.01616	1.10066	1.12776	-1.02541	0.143218	0.815652	0.775719	-0.194948	0.88659	0.417873	0.440912	0.846082	0.0522772	0.378956	0.355648	0.0725877	0.945978	0.772746	0.772746
hsa-miR-378f	380	0.00259436	0.204701	0.207295	0.199342	0.0125153	0.987485	0.0464596	89.5494	93.5494	93.7563	93.7083	0.419155	4	61	0.794197	2.9747	3.08994	3.12503	2.91538	2.95157	-0.401869	0.862556	1.2476	-1.05272	-0.655571	0.0231227	0.138364	0.173458	-0.0361966	1.01616	1.10066	1.12776	-1.02541	0.143218	0.815652	0.775719	-0.194948	0.88659	0.417873	0.440912	0.846082	0.0522772	0.378956	0.355648	0.0725877	0.945978	0.772746	0.772746
hsa-miR-378g	381	0.00259436	0.204701	0.207295	0.199342	0.0125153	0.987485	0.0464596	89.5494	93.5494	93.7563	93.7083	0.419155	4	61	0.794197	2.9747	3.08994	3.12503	2.91538	2.95157	-0.401869	0.862556	1.2476	-1.05272	-0.655571	0.0231227	0.138364	0.173458	-0.0361966	1.01616	1.10066	1.12776	-1.02541	0.143218	0.815652	0.775719	-0.194948	0.88659	0.417873	0.440912	0.846082	0.0522772	0.378956	0.355648	0.0725877	0.945978	0.772746	0.772746
hsa-miR-378h	382	0.00259436	0.204701	0.207295	0.199342	0.0125153	0.987485	0.0464596	89.5494	93.5494	93.7563	93.7083	0.419155	4	61	0.794197	2.9747	3.08994	3.12503	2.91538	2.95157	-0.401869	0.862556	1.2476	-1.05272	-0.655571	0.0231227	0.138364	0.173458	-0.0361966	1.01616	1.10066	1.12776	-1.02541	0.143218	0.815652	0.775719	-0.194948	0.88659	0.417873	0.440912	0.846082	0.0522772	0.378956	0.355648	0.0725877	0.945978	0.772746	0.772746
hsa-miR-379-3p	383	0.00259436	0.204701	0.207295	0.199342	0.0125153	0.987485	0.0464596	89.5494	93.5494	93.7563	93.7083	0.419155	4	61	0.794197	2.9747	3.08994	3.12503	2.91538	2.95157	-0.401869	0.862556	1.2476	-1.05272	-0.655571	0.0231227	0.138364	0.173458	-0.0361966	1.01616	1.10066	1.12776	-1.02541	0.143218	0.815652	0.775719	-0.194948	0.88659	0.417873	0.440912	0.846082	0.0522772	0.378956	0.355648	0.0725877	0.945978	0.772746	0.772746
hsa-miR-379-5p	384	0.147021	0.125882	0.272903	0.329292	0.538731	0.461269	0.67837	75.5106	79.5106	79.7175	79.6695	10.0414	4	61	2.60987e-06	4.97101	5.0199	4.28581	4.36357	4.8928	0.749702	0.888339	-1.19325	-0.972746	0.527949	0.0782027	0.127094	-0.606991	-0.52923	1.0557	1.09209	-1.52308	-1.44316	0.609473	0.922678	-3.41737	-3.5813	0.544475	0.35981	0.00113121	0.000678467	0.264022	0.443926	2.94646	3.16847	0.860333	0.772746	0.0102699
hsa-miR-381-3p	385	0.107182	0.19018	0.297362	0.313156	0.360442	0.639558	0.483442	96.281	100.281	100.488	100.44	2.75414	4	61	0.0358201	4.83658	4.82343	4.24958	4.57312	4.59849	0.92271	0.867652	-1.53547	-0.180574	-0.0743217	0.238084	0.224937	-0.348911	-0.0253722	1.17943	1.16873	-1.2736	-1.01774	1.5116	1.33328	-1.60042	-0.139898	0.1358	0.187398	0.114671	0.889201	0.8671	0.727236	0.940545	0.0509999	0.508032	0.635091	0.455779
hsa-miR-382-3p	386	0	0.191634	0.191634	0.184593	0	1	0.0257465	84.851	86.851	86.9188	86.9305	0.40301	4	61	0.805748	2.99938	3.0852	3.12112	2.91314	2.95514	-0.176862	0.807695	1.21979	-1.16621	-0.684406	0.0442405	0.13006	0.165981	-0.0419972	1.03114	1.09434	1.12193	-1.02954	0.28367	0.795685	0.768231	-0.234178	0.777624	0.429301	0.445314	0.815631	0.109231	0.367238	0.351334	0.0885064	0.945978	0.772746	0.772746
hsa-miR-382-5p	387	0.21279	0.221371	0.434161	0.59306	0.490117	0.509883	0.685201	108.728	112.728	112.935	112.887	12.3982	4	61	1.92985e-07	5.28315	5.21746	4.05377	4.43561	4.85681	0.981601	0.856098	-1.36714	-0.637626	0.167069	0.426344	0.360653	-0.803038	-0.421194	1.34382	1.28401	-1.74477	-1.33904	2.50632	1.97591	-3.41036	-2.15002	0.0148816	0.0526925	0.00115588	0.0355274	1.82735	1.27825	2.93709	1.44944	0.0922815	0.254944	0.0104547
hsa-miR-3913-3p	388	0.00259436	0.204701	0.207295	0.199342	0.0125153	0.987485	0.0464596	89.5494	93.5494	93.7563	93.7083	0.419155	4	61	0.794197	2.9747	3.08994	3.12503	2.91538	2.95157	-0.401869	0.862556	1.2476	-1.05272	-0.655571	0.0231227	0.138364	0.173458	-0.0361966	1.01616	1.10066	1.12776	-1.02541	0.143218	0.815652	0.775719	-0.194948	0.88659	0.417873	0.440912	0.846082	0.0522772	0.378956	0.355648	0.0725877	0.945978	0.772746	0.772746
hsa-miR-3922-5p	389	0	0.0848518	0.0848518	0.0910068	0	1	0.125008	35.1557	37.1557	37.2235	37.2351	2.17873	4	61	0.0819441	3.28352	3.21814	3.12112	3.03332	3.03748	1.30909	0.717996	-0.159054	-0.952816	-0.915213	0.246042	0.180658	0.0836429	-0.00415952	1.18595	1.1334	1.05969	-1.00289	2.37088	1.66096	0.581794	-0.0348558	0.0209207	0.101853	0.56285	0.972309	1.67942	0.992027	0.249608	0.0121959	0.12092	0.41917	0.87478
hsa-miR-409-3p	390	0.129451	0.158238	0.287689	0.582261	0.449968	0.550032	0.770291	87.2607	91.2607	91.4676	91.4195	32.3892	4	61	1.77419e-14	6.62219	6.32537	4.87015	5.42287	6.32643	0.961939	0.559101	-1.41586	-0.665728	0.560551	0.295756	-0.00106818	-1.45629	-0.903562	1.22753	-1.00074	-2.74401	-1.87068	2.057	-0.006927	-7.31716	-5.45706	0.0439691	0.994496	6.59739e-10	9.33919e-07	1.35685	0.00239709	9.18063	6.02969	0.219864	0.997251	5.01102e-08
hsa-miR-409-5p	391	0.00316203	0.176198	0.17936	0.172639	0.0176296	0.98237	0.0559512	80.665	84.665	84.8719	84.8239	0.43699	4	61	0.781372	3.00492	3.10628	3.12624	2.91566	3.00978	-0.323892	0.863249	1.09701	-1.36937	-0.266994	-0.00485793	0.0965006	0.116459	-0.0941214	-1.00337	1.06918	1.08407	-1.06742	-0.0324127	0.612243	0.56108	-0.546043	0.974249	0.542652	0.576798	0.587028	0.0113301	0.265478	0.238976	0.231341	0.987282	0.859181	0.886882
hsa-miR-411-5p	392	0.238339	0.194171	0.43251	0.425285	0.551061	0.448939	0.616081	102.262	106.262	106.469	106.421	3.01139	4	61	0.0247309	4.88094	4.91371	4.23834	4.6657	4.79337	0.664923	0.784286	-1.67598	-0.119162	0.345932	0.0875664	0.120333	-0.555038	-0.127674	1.06258	1.08699	-1.46921	-1.09253	0.549453	0.70327	-2.51588	-0.695591	0.5847	0.484563	0.0145216	0.489327	0.233067	0.31465	1.83799	0.310401	0.889812	0.806717	0.0907225
hsa-miR-412-5p	393	0.00259436	0.204701	0.207295	0.199342	0.0125153	0.987485	0.0464596	89.5494	93.5494	93.7563	93.7083	0.419155	4	61	0.794197	2.9747	3.08994	3.12503	2.91538	2.95157	-0.401869	0.862556	1.2476	-1.05272	-0.655571	0.0231227	0.138364	0.173458	-0.0361966	1.01616	1.10066	1.12776	-1.02541	0.143218	0.815652	0.775719	-0.194948	0.88659	0.417873	0.440912	0.846082	0.0522772	0.378956	0.355648	0.0725877	0.945978	0.772746	0.772746
hsa-miR-421	394	0.0305996	0.0426141	0.0732138	0.0698618	0.417949	0.582051	0.483384	6.45102	10.451	10.6579	10.6099	0.722251	4	61	0.580084	6.9454	6.91421	6.85895	6.98009	7.01006	0.0623382	-0.469283	-1.41143	0.653752	1.16463	-0.0646585	-0.0958426	-0.151108	-0.029967	-1.04584	-1.06869	-1.11042	-1.02099	-0.866785	-1.19846	-1.46344	-0.348855	0.389456	0.235375	0.148482	0.728399	0.409541	0.62824	0.828326	0.137631	0.772746	0.733353	0.540421
hsa-miR-423-3p	395	0.0334042	0.0518271	0.0852313	0.133238	0.391924	0.608076	0.66995	17.7532	21.7532	21.9601	21.9121	19.8565	4	61	1.64705e-10	9.7016	9.62936	9.02109	9.27613	9.85895	0.598414	0.386688	-1.39609	-0.648577	1.05956	-0.157342	-0.229582	-0.83786	-0.582812	-1.11523	-1.1725	-1.7874	-1.49777	-1.91304	-2.6047	-7.35969	-6.15373	0.0604394	0.0115352	5.57351e-10	6.43719e-08	1.21868	1.93797	9.25387	7.1913	0.280661	0.074763	4.65869e-08
hsa-miR-423-5p	396	0.0564946	0.322235	0.378729	0.897765	0.149169	0.850831	0.685613	122.661	126.661	126.868	126.82	28.1128	4	61	2.98655e-13	9.95262	9.82802	7.66267	8.59457	9.86534	0.75958	0.636988	-1.49361	-0.576667	0.673706	0.0872744	-0.0373175	-2.20267	-1.27077	1.06236	-1.0262	-4.6033	-2.4129	0.427282	-0.171622	-7.79153	-5.40577	0.670678	0.864303	1.00506e-10	1.13343e-06	0.173486	0.063334	9.99781	5.94561	0.945978	0.945978	1.1074e-08
hsa-miR-424-3p	397	0.00925807	0.141163	0.150421	0.1496	0.0615479	0.938452	0.14927	69.1465	73.1465	73.3534	73.3054	1.00977	4	61	0.409506	3.22824	3.09549	3.12626	2.99359	3.00408	1.43969	0.0618088	0.381185	-0.995804	-0.886878	0.22416	0.0914039	0.122175	-0.0104948	1.1681	1.06541	1.08837	-1.0073	1.66469	0.641694	0.655422	-0.0677473	0.101104	0.523476	0.51466	0.946208	0.99523	0.281103	0.288479	0.0240132	0.418221	0.839923	0.832802
hsa-miR-424-5p	398	0.724382	0.28863	1.01301	1.60332	0.715077	0.284923	0.849508	131.105	135.105	135.312	135.264	37.4147	4	61	8.68557e-16	4.27737	3.65569	5.88228	5.28501	3.32797	-0.192936	-0.768793	1.29366	0.740424	-1.07236	0.949405	0.327721	2.55431	1.95704	1.93108	1.25503	5.87385	3.88265	4.88273	1.56802	9.48928	8.73825	7.88923e-06	0.12205	1.27335e-13	2.38644e-12	5.10297	0.913462	12.8951	11.6222	0.000154222	0.47792	1.5433e-10
hsa-miR-425-3p	399	0.0160723	0.0371667	0.053239	0.063987	0.301889	0.698111	0.503257	-4.77937	-0.77937	-0.572473	-0.620487	7.76349	4	61	3.99874e-05	7.65246	7.90477	7.68968	7.72973	7.98891	-0.963141	0.764623	-0.708267	-0.434001	1.34079	-0.336448	-0.0841387	-0.299228	-0.259176	-1.26264	-1.06005	-1.23049	-1.1968	-4.83528	-1.13016	-3.10695	-3.23511	9.37547e-06	0.262833	0.00286865	0.00196562	5.02801	0.580321	2.54232	2.7065	0.000176172	0.772746	0.0228737
hsa-miR-425-5p	400	0.00819203	0.0486651	0.0568571	0.0649893	0.144081	0.855919	0.343315	7.18789	11.1879	11.3948	11.3468	4.2545	4	61	0.00421158	11.8357	11.9693	11.8897	11.8865	12.1492	-0.895699	0.188429	-0.457875	-0.48368	1.64882	-0.313478	-0.179917	-0.259539	-0.262719	-1.2427	-1.13282	-1.1971	-1.19974	-3.94987	-2.13006	-2.36278	-2.87631	0.000205398	0.0372086	0.0213431	0.00553565	3.6874	1.42936	1.67074	2.25683	0.00231575	0.190619	0.122596
hsa-miR-4281	401	0.00454377	0.265778	0.270322	0.265459	0.0168088	0.983191	0.0733427	105.698	109.698	109.905	109.857	0.789708	4	61	0.536371	2.97483	3.09152	3.35904	3.05077	2.94935	-0.674701	0.0392896	1.67608	-0.210078	-0.830586	0.0254779	0.142173	0.409691	0.101416	1.01782	1.10357	1.3284	1.07283	0.138423	0.734605	1.60725	0.479104	0.890362	0.465395	0.113164	0.633578	0.0504333	0.332178	0.94629	0.1982	0.947843	0.785597	0.452768
hsa-miR-4286	402	0.0670991	0.213974	0.281073	0.273435	0.238725	0.761275	0.325628	100.325	104.325	104.532	104.484	0.987287	4	61	0.42131	3.70265	3.55013	3.28756	3.53672	3.53148	1.21511	0.190884	-1.57245	0.100816	0.0656319	0.171165	0.0186507	-0.243919	0.00523917	1.12597	1.01301	-1.18421	1.00364	1.0262	0.104676	-1.05659	0.0272852	0.308849	0.916977	0.294866	0.978321	0.510253	0.0376418	0.530375	0.00951849	0.772746	0.960096	0.772746
hsa-miR-429	403	0.00259436	0.204701	0.207295	0.199342	0.0125153	0.987485	0.0464596	89.5494	93.5494	93.7563	93.7083	0.419155	4	61	0.794197	2.9747	3.08994	3.12503	2.91538	2.95157	-0.401869	0.862556	1.2476	-1.05272	-0.655571	0.0231227	0.138364	0.173458	-0.0361966	1.01616	1.10066	1.12776	-1.02541	0.143218	0.815652	0.775719	-0.194948	0.88659	0.417873	0.440912	0.846082	0.0522772	0.378956	0.355648	0.0725877	0.945978	0.772746	0.772746
hsa-miR-4298	404	0.0013991	0.200675	0.202074	0.194439	0.00692368	0.993076	0.0373002	88.0423	92.0423	92.2492	92.2012	0.409334	4	61	0.801231	2.98179	3.08779	3.12332	2.91437	2.9532	-0.338616	0.845779	1.24283	-1.09196	-0.65803	0.0285859	0.134583	0.170117	-0.0388344	1.02001	1.09778	1.12515	-1.02728	0.178948	0.802687	0.768825	-0.211398	0.858572	0.425272	0.444964	0.833282	0.0662234	0.371333	0.351675	0.0792082	0.945978	0.772746	0.772746
hsa-miR-4301	405	0	0.184914	0.184914	0.178873	0	1	0.0298465	82.6736	84.6736	84.7414	84.7531	0.469162	4	61	0.758123	3.03826	3.0852	3.14404	2.91314	2.95514	0.118142	0.61753	1.24351	-1.21299	-0.766184	0.0831209	0.13006	0.188898	-0.0419972	1.05931	1.09434	1.13989	-1.02954	0.542569	0.810014	0.890047	-0.238395	0.589403	0.421081	0.376938	0.812374	0.229587	0.375634	0.42373	0.0902442	0.893504	0.772746	0.772746
hsa-miR-4304	406	0.176625	0.415931	0.592555	0.754755	0.298073	0.701927	0.528524	142.444	146.444	146.651	146.603	10.8417	4	61	1.0527e-06	4.74793	3.38615	3.91898	3.69726	3.69982	1.66335	-0.976945	0.0561397	-0.373745	-0.368798	1.04811	-0.313661	0.219168	-0.00255148	2.06782	-1.24286	1.16406	-1.00177	4.50298	-1.25959	0.680298	-0.00952088	3.08175e-05	0.212614	0.49889	0.992435	4.5112	0.672407	0.301995	0.00329809	0.000472831	0.69427	0.81876
hsa-miR-4306	407	0.00259436	0.204701	0.207295	0.199342	0.0125153	0.987485	0.0464596	89.5494	93.5494	93.7563	93.7083	0.419155	4	61	0.794197	2.9747	3.08994	3.12503	2.91538	2.95157	-0.401869	0.862556	1.2476	-1.05272	-0.655571	0.0231227	0.138364	0.173458	-0.0361966	1.01616	1.10066	1.12776	-1.02541	0.143218	0.815652	0.775719	-0.194948	0.88659	0.417873	0.440912	0.846082	0.0522772	0.378956	0.355648	0.0725877	0.945978	0.772746	0.772746
hsa-miR-431-3p	408	0.00259436	0.204701	0.207295	0.199342	0.0125153	0.987485	0.0464596	89.5494	93.5494	93.7563	93.7083	0.419155	4	61	0.794197	2.9747	3.08994	3.12503	2.91538	2.95157	-0.401869	0.862556	1.2476	-1.05272	-0.655571	0.0231227	0.138364	0.173458	-0.0361966	1.01616	1.10066	1.12776	-1.02541	0.143218	0.815652	0.775719	-0.194948	0.88659	0.417873	0.440912	0.846082	0.0522772	0.378956	0.355648	0.0725877	0.945978	0.772746	0.772746
hsa-miR-431-5p	409	0.323217	0.158908	0.482125	0.704156	0.670401	0.329599	0.811088	93.3068	97.3068	97.5137	97.4656	24.464	4	61	4.15278e-12	5.03491	4.98974	3.66857	3.99365	4.88117	0.819642	0.748635	-1.32867	-0.817533	0.577928	0.153731	0.108571	-1.21261	-0.88752	1.11244	1.07816	-2.31756	-1.84999	1.06572	0.700399	-6.07233	-5.34173	0.290752	0.486341	8.83153e-08	1.44225e-06	0.536478	0.313059	7.05396	5.84096	0.772746	0.809122	2.97328e-06
hsa-miR-4325	410	0.00259436	0.204701	0.207295	0.199342	0.0125153	0.987485	0.0464596	89.5494	93.5494	93.7563	93.7083	0.419155	4	61	0.794197	2.9747	3.08994	3.12503	2.91538	2.95157	-0.401869	0.862556	1.2476	-1.05272	-0.655571	0.0231227	0.138364	0.173458	-0.0361966	1.01616	1.10066	1.12776	-1.02541	0.143218	0.815652	0.775719	-0.194948	0.88659	0.417873	0.440912	0.846082	0.0522772	0.378956	0.355648	0.0725877	0.945978	0.772746	0.772746
hsa-miR-432-5p	411	0.300031	0.113646	0.413677	0.62142	0.725278	0.274722	0.847162	74.5877	78.5877	78.7946	78.7466	29.3257	4	61	1.30561e-13	5.22457	5.36007	4.02956	4.36282	5.18246	0.659094	0.88652	-1.34669	-0.787329	0.588404	0.0421159	0.177613	-1.1529	-0.819641	1.02962	1.13101	-2.2236	-1.76497	0.345172	1.35418	-6.82541	-5.83209	0.731152	0.180676	4.61963e-09	2.23405e-07	0.135992	0.7431	8.33539	6.65091	0.945978	0.620337	2.545e-07
hsa-miR-4422	412	0.00259436	0.204701	0.207295	0.199342	0.0125153	0.987485	0.0464596	89.5494	93.5494	93.7563	93.7083	0.419155	4	61	0.794197	2.9747	3.08994	3.12503	2.91538	2.95157	-0.401869	0.862556	1.2476	-1.05272	-0.655571	0.0231227	0.138364	0.173458	-0.0361966	1.01616	1.10066	1.12776	-1.02541	0.143218	0.815652	0.775719	-0.194948	0.88659	0.417873	0.440912	0.846082	0.0522772	0.378956	0.355648	0.0725877	0.945978	0.772746	0.772746
hsa-miR-4429	413	0.00259436	0.204701	0.207295	0.199342	0.0125153	0.987485	0.0464596	89.5494	93.5494	93.7563	93.7083	0.419155	4	61	0.794197	2.9747	3.08994	3.12503	2.91538	2.95157	-0.401869	0.862556	1.2476	-1.05272	-0.655571	0.0231227	0.138364	0.173458	-0.0361966	1.01616	1.10066	1.12776	-1.02541	0.143218	0.815652	0.775719	-0.194948	0.88659	0.417873	0.440912	0.846082	0.0522772	0.378956	0.355648	0.0725877	0.945978	0.772746	0.772746
hsa-miR-4446-3p	414	0.0545566	0.21341	0.267967	0.322395	0.203595	0.796405	0.42645	99.1767	103.177	103.384	103.336	5.20497	4	61	0.00112959	3.58949	3.59351	3.11012	2.94923	3.61092	0.691381	0.704054	-0.823099	-1.3314	0.759065	-0.0214238	-0.0174123	-0.500796	-0.661687	-1.01496	-1.01214	-1.41499	-1.58193	-0.128703	-0.0980335	-2.1737	-3.45327	0.898016	0.922227	0.0336188	0.00101254	0.0467159	0.0351621	1.47342	2.99459	0.950944	0.962738	0.178319
hsa-miR-4454	415	0.0516443	0.0610561	0.1127	0.104069	0.458244	0.541756	0.504341	29.3726	33.3726	33.5795	33.5315	0.0640169	4	61	0.992266	7.2201	7.22185	7.23569	7.26134	7.24417	-0.970536	-0.867922	-0.0553851	1.4511	0.442748	-0.0240687	-0.0223212	-0.00848338	0.0171725	-1.01682	-1.01559	-1.0059	1.01197	-0.269475	-0.232991	-0.0686164	0.166954	0.788473	0.816548	0.945519	0.867959	0.103213	0.0880181	0.0243296	0.0615009	0.945978	0.945978	0.973223
hsa-miR-4469	416	0	0.175151	0.175151	0.169335	0	1	0.0293054	79.365	81.365	81.4328	81.4445	0.460399	4	61	0.764464	3.1516	3.0852	3.12112	3.11041	2.95514	0.877595	0.00663991	0.4778	0.337296	-1.69933	0.19646	0.13006	0.165981	0.155269	1.14588	1.09434	1.12193	1.11363	1.31764	0.832281	0.803565	0.905607	0.192551	0.408497	0.424769	0.368707	0.715454	0.388811	0.371848	0.433318	0.646459	0.772746	0.772746
hsa-miR-4483	417	0.00622766	0.196732	0.20296	0.199802	0.0306842	0.969316	0.0973013	88.0282	92.0282	92.2351	92.187	0.876613	4	61	0.483288	2.9747	3.09545	3.2712	2.91716	2.94687	-0.456558	0.373982	1.58285	-0.852323	-0.647948	0.0278258	0.148576	0.32433	-0.0297136	1.01947	1.10847	1.25208	-1.02081	0.175468	0.889068	1.47705	-0.162906	0.861293	0.377459	0.144805	0.871131	0.0648489	0.42313	0.839215	0.0599166	0.945978	0.772746	0.531831
hsa-miR-4485-3p	418	0.00259436	0.204701	0.207295	0.199342	0.0125153	0.987485	0.0464596	89.5494	93.5494	93.7563	93.7083	0.419155	4	61	0.794197	2.9747	3.08994	3.12503	2.91538	2.95157	-0.401869	0.862556	1.2476	-1.05272	-0.655571	0.0231227	0.138364	0.173458	-0.0361966	1.01616	1.10066	1.12776	-1.02541	0.143218	0.815652	0.775719	-0.194948	0.88659	0.417873	0.440912	0.846082	0.0522772	0.378956	0.355648	0.0725877	0.945978	0.772746	0.772746
hsa-miR-449a	419	1.07039	0.158086	1.22848	1.04132	0.871315	0.128685	0.873577	101.114	105.114	105.321	105.273	1.56974	4	61	0.193779	3.59348	3.70336	3.70233	3.37826	3.43993	0.200812	0.936156	0.929244	-1.23948	-0.826733	0.153546	0.263428	0.262395	-0.0616763	1.1123	1.20033	1.19947	-1.04368	1.06654	1.701	1.31651	-0.371912	0.290382	0.0940351	0.192926	0.711247	0.537031	1.02671	0.714608	0.147979	0.772746	0.395731	0.646824
hsa-miR-4500	420	0.00259436	0.204701	0.207295	0.199342	0.0125153	0.987485	0.0464596	89.5494	93.5494	93.7563	93.7083	0.419155	4	61	0.794197	2.9747	3.08994	3.12503	2.91538	2.95157	-0.401869	0.862556	1.2476	-1.05272	-0.655571	0.0231227	0.138364	0.173458	-0.0361966	1.01616	1.10066	1.12776	-1.02541	0.143218	0.815652	0.775719	-0.194948	0.88659	0.417873	0.440912	0.846082	0.0522772	0.378956	0.355648	0.0725877	0.945978	0.772746	0.772746
hsa-miR-4508	421	0.00259436	0.204701	0.207295	0.199342	0.0125153	0.987485	0.0464596	89.5494	93.5494	93.7563	93.7083	0.419155	4	61	0.794197	2.9747	3.08994	3.12503	2.91538	2.95157	-0.401869	0.862556	1.2476	-1.05272	-0.655571	0.0231227	0.138364	0.173458	-0.0361966	1.01616	1.10066	1.12776	-1.02541	0.143218	0.815652	0.775719	-0.194948	0.88659	0.417873	0.440912	0.846082	0.0522772	0.378956	0.355648	0.0725877	0.945978	0.772746	0.772746
hsa-miR-450a-1-3p	422	0.00244354	0.201253	0.203697	0.195878	0.011996	0.988004	0.045554	88.4862	92.4862	92.6931	92.645	0.416921	4	61	0.795799	2.98159	3.08972	3.12483	2.91535	2.95168	-0.343482	0.852932	1.24138	-1.07639	-0.674439	0.0299122	0.138046	0.173154	-0.0363293	1.02095	1.10041	1.12752	-1.0255	0.186863	0.820844	0.781008	-0.197344	0.852388	0.414931	0.437818	0.844214	0.0693627	0.382024	0.358706	0.0735474	0.945978	0.772746	0.772746
hsa-miR-450b-5p	423	0.00586643	0.154516	0.160383	0.164138	0.0365777	0.963422	0.14007	73.5693	77.5693	77.7762	77.7282	1.54419	4	61	0.200756	3.29446	3.11232	3.19209	3.13201	2.95192	1.26102	-0.193579	0.443476	-0.0363458	-1.47457	0.342547	0.160404	0.240175	0.180092	1.26799	1.1176	1.18114	1.13296	2.43606	1.08159	1.23362	1.11347	0.0177839	0.283694	0.222076	0.269875	1.74997	0.54715	0.653499	0.568838	0.105399	0.772746	0.707374
hsa-miR-4510	424	0	0.29246	0.29246	0.289071	0	1	0.0505371	110.638	112.638	112.706	112.718	0.811712	4	61	0.522575	3.25818	3.40773	3.22804	3.09756	3.0953	0.314723	1.46794	0.0823777	-0.923822	-0.941213	0.162873	0.312425	0.132742	0.00225527	1.11951	1.24179	1.09638	1.00156	0.845368	1.54719	0.497331	0.0101795	0.401209	0.126989	0.620744	0.991911	0.396629	0.896233	0.207088	0.00352717	0.772746	0.490219	0.920858
hsa-miR-4515	425	0	0.191634	0.191634	0.184593	0	1	0.0257465	84.851	86.851	86.9188	86.9305	0.40301	4	61	0.805748	2.99938	3.0852	3.12112	2.91314	2.95514	-0.176862	0.807695	1.21979	-1.16621	-0.684406	0.0442405	0.13006	0.165981	-0.0419972	1.03114	1.09434	1.12193	-1.02954	0.28367	0.795685	0.768231	-0.234178	0.777624	0.429301	0.445314	0.815631	0.109231	0.367238	0.351334	0.0885064	0.945978	0.772746	0.772746
hsa-miR-451a	426	0.0450583	0.0926613	0.13772	0.140781	0.327174	0.672826	0.438515	51.5896	55.5896	55.7965	55.7485	2.83341	4	61	0.031954	14.8044	14.8773	15.2063	15.0145	14.779	-0.747261	-0.333914	1.52965	0.442735	-0.891211	0.0254134	0.098387	0.427387	0.235499	1.01777	1.07058	1.3448	1.17731	0.231238	0.836278	2.80957	1.86105	0.817904	0.406263	0.00665736	0.0675587	0.0872977	0.391193	2.1767	1.17032	0.945978	0.772746	0.0471855
hsa-miR-451b	427	0.0304035	0.0878601	0.118264	0.125445	0.257083	0.742917	0.397927	46.5264	50.5264	50.7333	50.6853	1.61024	4	61	0.183183	4.53487	4.69062	4.62808	4.60276	4.41341	-0.369756	1.104	0.512272	0.272605	-1.51912	0.121465	0.277212	0.214678	0.18935	1.08784	1.21185	1.16045	1.14025	1.13611	2.42599	1.45075	1.53837	0.260355	0.018239	0.151971	0.129129	0.584434	1.739	0.818239	0.888978	0.772746	0.107833	0.552291
hsa-miR-454-3p	428	0.0356073	0.0176364	0.0532437	0.0513859	0.668761	0.331239	0.712683	-40.8421	-36.8421	-36.6352	-36.6833	1.08456	4	61	0.372126	9.76725	9.6751	9.7365	9.70235	9.70751	1.40553	-1.21066	0.532465	-0.43697	-0.290371	0.0597372	-0.0324166	0.0289839	-0.00516388	1.04228	-1.02272	1.02029	-1.00359	1.24307	-0.627734	0.435675	-0.0932934	0.218599	0.532521	0.664611	0.925976	0.660352	0.273663	0.177433	0.0334002	0.704381	0.8489	0.945978
hsa-miR-454-5p	429	0.00933334	0.132071	0.141405	0.143929	0.0660045	0.933995	0.17437	65.2691	69.2691	69.476	69.428	1.37353	4	61	0.253643	3.41756	3.51454	3.54008	3.22748	3.32552	0.0959034	0.838396	1.03399	-1.35944	-0.608851	0.0920471	0.189023	0.214569	-0.0980328	1.06588	1.13999	1.16036	-1.07031	0.706506	1.37092	1.18972	-0.654048	0.482563	0.175423	0.238765	0.515539	0.316446	0.755914	0.622029	0.287738	0.805221	0.606779	0.739166
hsa-miR-455-5p	430	0.00538057	0.214696	0.220077	0.209718	0.0244486	0.975551	0.0576062	93.0586	97.0586	97.2655	97.2175	0.319374	4	61	0.863944	2.97482	3.09387	3.13052	2.98762	2.94815	-0.651211	0.834644	1.29205	-0.491397	-0.984087	0.0266706	0.14572	0.182368	0.0394751	1.01866	1.10628	1.13474	1.02774	0.161091	0.835991	0.795453	0.207307	0.872554	0.406423	0.429435	0.836461	0.0592076	0.391022	0.367103	0.0775544	0.945978	0.772746	0.772746
hsa-miR-4632-5p	431	0	0.189309	0.189309	0.182074	0	1	0.0242458	84.1065	86.1065	86.1743	86.1859	0.378936	4	61	0.822824	2.99403	3.0852	3.12112	2.92564	2.95514	-0.264364	0.821603	1.24949	-1.07905	-0.72768	0.0388947	0.13006	0.165981	-0.0294968	1.02733	1.09434	1.12193	-1.02066	0.25092	0.800556	0.772934	-0.165483	0.802719	0.426496	0.442546	0.869111	0.0954363	0.370085	0.354041	0.0609246	0.945978	0.772746	0.772746
hsa-miR-4649-3p	432	0.00259436	0.204701	0.207295	0.199342	0.0125153	0.987485	0.0464596	89.5494	93.5494	93.7563	93.7083	0.419155	4	61	0.794197	2.9747	3.08994	3.12503	2.91538	2.95157	-0.401869	0.862556	1.2476	-1.05272	-0.655571	0.0231227	0.138364	0.173458	-0.0361966	1.01616	1.10066	1.12776	-1.02541	0.143218	0.815652	0.775719	-0.194948	0.88659	0.417873	0.440912	0.846082	0.0522772	0.378956	0.355648	0.0725877	0.945978	0.772746	0.772746
hsa-miR-4664-5p	433	0.00259436	0.204701	0.207295	0.199342	0.0125153	0.987485	0.0464596	89.5494	93.5494	93.7563	93.7083	0.419155	4	61	0.794197	2.9747	3.08994	3.12503	2.91538	2.95157	-0.401869	0.862556	1.2476	-1.05272	-0.655571	0.0231227	0.138364	0.173458	-0.0361966	1.01616	1.10066	1.12776	-1.02541	0.143218	0.815652	0.775719	-0.194948	0.88659	0.417873	0.440912	0.846082	0.0522772	0.378956	0.355648	0.0725877	0.945978	0.772746	0.772746
hsa-miR-4670-5p	434	0.00259436	0.204701	0.207295	0.199342	0.0125153	0.987485	0.0464596	89.5494	93.5494	93.7563	93.7083	0.419155	4	61	0.794197	2.9747	3.08994	3.12503	2.91538	2.95157	-0.401869	0.862556	1.2476	-1.05272	-0.655571	0.0231227	0.138364	0.173458	-0.0361966	1.01616	1.10066	1.12776	-1.02541	0.143218	0.815652	0.775719	-0.194948	0.88659	0.417873	0.440912	0.846082	0.0522772	0.378956	0.355648	0.0725877	0.945978	0.772746	0.772746
hsa-miR-4676-3p	435	0.00259436	0.204701	0.207295	0.199342	0.0125153	0.987485	0.0464596	89.5494	93.5494	93.7563	93.7083	0.419155	4	61	0.794197	2.9747	3.08994	3.12503	2.91538	2.95157	-0.401869	0.862556	1.2476	-1.05272	-0.655571	0.0231227	0.138364	0.173458	-0.0361966	1.01616	1.10066	1.12776	-1.02541	0.143218	0.815652	0.775719	-0.194948	0.88659	0.417873	0.440912	0.846082	0.0522772	0.378956	0.355648	0.0725877	0.945978	0.772746	0.772746
hsa-miR-4677-3p	436	0.00259436	0.204701	0.207295	0.199342	0.0125153	0.987485	0.0464596	89.5494	93.5494	93.7563	93.7083	0.419155	4	61	0.794197	2.9747	3.08994	3.12503	2.91538	2.95157	-0.401869	0.862556	1.2476	-1.05272	-0.655571	0.0231227	0.138364	0.173458	-0.0361966	1.01616	1.10066	1.12776	-1.02541	0.143218	0.815652	0.775719	-0.194948	0.88659	0.417873	0.440912	0.846082	0.0522772	0.378956	0.355648	0.0725877	0.945978	0.772746	0.772746
hsa-miR-4732-3p	437	0.0674269	0.170058	0.237485	0.271262	0.28392	0.71608	0.46281	87.5201	91.5201	91.727	91.679	4.80716	4	61	0.00195037	4.83722	4.44916	4.21383	4.25775	4.5314	1.52046	-0.0349099	-0.978133	-0.802113	0.294692	0.305826	-0.0822346	-0.317566	-0.273649	1.23613	-1.05866	-1.24623	-1.20886	2.05524	-0.516725	-1.54189	-1.5973	0.0441447	0.607217	0.128272	0.115367	1.35512	0.216656	0.891867	0.937918	0.220158	0.909961	0.493543
hsa-miR-4738-3p	438	0.00259436	0.204701	0.207295	0.199342	0.0125153	0.987485	0.0464596	89.5494	93.5494	93.7563	93.7083	0.419155	4	61	0.794197	2.9747	3.08994	3.12503	2.91538	2.95157	-0.401869	0.862556	1.2476	-1.05272	-0.655571	0.0231227	0.138364	0.173458	-0.0361966	1.01616	1.10066	1.12776	-1.02541	0.143218	0.815652	0.775719	-0.194948	0.88659	0.417873	0.440912	0.846082	0.0522772	0.378956	0.355648	0.0725877	0.945978	0.772746	0.772746
hsa-miR-4745-5p	439	0.0585742	0.206026	0.2646	0.285709	0.221369	0.778631	0.376985	97.5346	101.535	101.742	101.694	2.56748	4	61	0.0468718	3.39636	3.40601	3.1462	3.80302	3.34378	-0.0950882	-0.0546807	-1.14237	1.60736	-0.31522	0.0525825	0.0622346	-0.19758	0.459243	1.03712	1.04408	-1.14677	1.37482	0.321381	0.356267	-0.872502	2.4383	0.74902	0.72287	0.386356	0.0176841	0.125506	0.14094	0.413012	1.75242	0.945978	0.945978	0.772746
hsa-miR-4749-3p	440	0.00259436	0.204701	0.207295	0.199342	0.0125153	0.987485	0.0464596	89.5494	93.5494	93.7563	93.7083	0.419155	4	61	0.794197	2.9747	3.08994	3.12503	2.91538	2.95157	-0.401869	0.862556	1.2476	-1.05272	-0.655571	0.0231227	0.138364	0.173458	-0.0361966	1.01616	1.10066	1.12776	-1.02541	0.143218	0.815652	0.775719	-0.194948	0.88659	0.417873	0.440912	0.846082	0.0522772	0.378956	0.355648	0.0725877	0.945978	0.772746	0.772746
hsa-miR-4766-3p	441	0.212556	0.17743	0.389985	0.353796	0.545035	0.454965	0.578181	96.6084	100.608	100.815	100.767	1.33427	4	61	0.267483	3.62499	3.79914	3.91817	3.76036	3.94923	-1.42296	-0.0862309	0.827382	-0.383917	1.06573	-0.324238	-0.150083	-0.031053	-0.188866	-1.252	-1.10963	-1.02176	-1.13987	-2.12838	-0.917663	-0.147253	-1.07647	0.0373532	0.362409	0.883418	0.285957	1.42767	0.440801	0.0538339	0.5437	0.190619	0.772746	0.945978
hsa-miR-4766-5p	442	0.015139	0.132504	0.147643	0.14611	0.102538	0.897462	0.195329	66.8693	70.8693	71.0762	71.0282	0.906753	4	61	0.465775	3.0439	3.1165	3.1543	2.92438	3.18363	-0.391971	0.308198	0.672731	-1.54455	0.955595	-0.139735	-0.0671315	-0.0293315	-0.259252	-1.1017	-1.04763	-1.02054	-1.19686	-1.06871	-0.48365	-0.162073	-1.72315	0.289411	0.630366	0.871784	0.0899272	0.538485	0.200407	0.0595911	1.04611	0.772746	0.929402	0.945978
hsa-miR-4781-3p	443	0.00259436	0.204701	0.207295	0.199342	0.0125153	0.987485	0.0464596	89.5494	93.5494	93.7563	93.7083	0.419155	4	61	0.794197	2.9747	3.08994	3.12503	2.91538	2.95157	-0.401869	0.862556	1.2476	-1.05272	-0.655571	0.0231227	0.138364	0.173458	-0.0361966	1.01616	1.10066	1.12776	-1.02541	0.143218	0.815652	0.775719	-0.194948	0.88659	0.417873	0.440912	0.846082	0.0522772	0.378956	0.355648	0.0725877	0.945978	0.772746	0.772746
hsa-miR-4784	444	0.142233	0.655448	0.797682	1.26015	0.178309	0.821691	0.547251	166.879	170.879	171.086	171.038	14.8103	4	61	1.64357e-08	5.34073	3.35022	4.45259	4.53001	3.72793	1.37282	-1.20406	0.223054	0.323279	-0.715089	1.6128	-0.377706	0.724668	0.802086	3.05845	-1.29927	1.65252	1.74362	5.53185	-1.21533	1.79588	2.39017	7.03573e-07	0.228923	0.0774671	0.0199442	6.15269	0.64031	1.11088	1.70018	1.81432e-05	0.718796	0.338954
hsa-miR-4785	445	0.00259436	0.204701	0.207295	0.199342	0.0125153	0.987485	0.0464596	89.5494	93.5494	93.7563	93.7083	0.419155	4	61	0.794197	2.9747	3.08994	3.12503	2.91538	2.95157	-0.401869	0.862556	1.2476	-1.05272	-0.655571	0.0231227	0.138364	0.173458	-0.0361966	1.01616	1.10066	1.12776	-1.02541	0.143218	0.815652	0.775719	-0.194948	0.88659	0.417873	0.440912	0.846082	0.0522772	0.378956	0.355648	0.0725877	0.945978	0.772746	0.772746
hsa-miR-4787-5p	446	0.00259436	0.204701	0.207295	0.199342	0.0125153	0.987485	0.0464596	89.5494	93.5494	93.7563	93.7083	0.419155	4	61	0.794197	2.9747	3.08994	3.12503	2.91538	2.95157	-0.401869	0.862556	1.2476	-1.05272	-0.655571	0.0231227	0.138364	0.173458	-0.0361966	1.01616	1.10066	1.12776	-1.02541	0.143218	0.815652	0.775719	-0.194948	0.88659	0.417873	0.440912	0.846082	0.0522772	0.378956	0.355648	0.0725877	0.945978	0.772746	0.772746
hsa-miR-4796-3p	447	0.0013991	0.200675	0.202074	0.194439	0.00692368	0.993076	0.0373002	88.0423	92.0423	92.2492	92.2012	0.409334	4	61	0.801231	2.98179	3.08779	3.12332	2.91437	2.9532	-0.338616	0.845779	1.24283	-1.09196	-0.65803	0.0285859	0.134583	0.170117	-0.0388344	1.02001	1.09778	1.12515	-1.02728	0.178948	0.802687	0.768825	-0.211398	0.858572	0.425272	0.444964	0.833282	0.0662234	0.371333	0.351675	0.0792082	0.945978	0.772746	0.772746
hsa-miR-484	448	0.0788133	0.186691	0.265504	0.303858	0.296844	0.703156	0.474281	93.5472	97.5472	97.7541	97.7061	7.24722	4	61	7.66013e-05	9.351	8.53975	8.93905	8.94676	9.05716	1.3193	-1.46606	-0.0950701	-0.0686165	0.310437	0.29384	-0.517416	-0.118107	-0.110402	1.2259	-1.43139	-1.08531	-1.07953	1.88434	-3.10154	-0.547208	-0.61492	0.0642864	0.00291426	0.586232	0.540895	1.19188	2.53547	0.23193	0.266887	0.293091	0.0230855	0.891004
hsa-miR-485-3p	449	0	0.202419	0.202419	0.21582	0	1	0.119813	88.191	90.191	90.2588	90.2705	2.07587	4	61	0.0949259	3.32595	3.0852	3.12112	2.91314	2.95514	1.51275	0.031315	0.252346	-1.02742	-0.768993	0.370812	0.13006	0.165981	-0.0419972	1.29308	1.09434	1.12193	-1.02954	2.31344	0.774197	0.747485	-0.227854	0.0240848	0.441805	0.457643	0.820522	1.61826	0.35477	0.339473	0.08591	0.134253	0.772746	0.777998
hsa-miR-485-5p	450	0.00030746	0.197515	0.197822	0.190464	0.00155422	0.998446	0.0281669	86.7815	90.7815	90.9884	90.9404	0.40069	4	61	0.807401	2.98822	3.08577	3.12162	2.91342	2.95471	-0.278491	0.829193	1.23626	-1.12794	-0.65902	0.0335119	0.131062	0.16691	-0.0412961	1.0235	1.0951	1.12265	-1.02904	0.211609	0.789348	0.760807	-0.226762	0.833118	0.432966	0.449704	0.821367	0.0792936	0.363546	0.347074	0.0854628	0.945978	0.772746	0.773256
hsa-miR-486-3p	451	0.0275849	0.627421	0.655006	0.635929	0.042114	0.957886	0.101618	159.302	163.302	163.509	163.461	0.634521	4	61	0.639808	11.7625	11.8673	11.4414	11.5857	11.4887	0.735869	1.31438	-1.03586	-0.239436	-0.774954	0.273799	0.37864	-0.0472831	0.0970492	1.20899	1.30012	-1.03332	1.06958	0.96584	1.2655	-0.120472	0.297621	0.337938	0.210506	0.904505	0.767004	0.471163	0.676736	0.043589	0.115203	0.772746	0.690481	0.95493
hsa-miR-486-5p	452	0.0554146	0.0751465	0.130561	0.147252	0.424434	0.575566	0.567968	41.212	45.212	45.4189	45.3709	7.28348	4	61	7.31535e-05	15.8865	15.7792	15.3803	15.47	15.8692	0.888908	0.433332	-1.25911	-0.87853	0.815404	0.017324	-0.0900501	-0.488941	-0.399241	1.01208	-1.06441	-1.40341	-1.31881	0.174877	-0.847832	-3.56568	-3.49972	0.861755	0.399846	0.000712742	0.000876444	0.0646161	0.398107	3.14707	3.05728	0.945978	0.772746	0.0068288
hsa-miR-487b-3p	453	0.126184	0.181218	0.307402	0.379608	0.410485	0.589515	0.59547	94.5669	98.5669	98.7738	98.7257	8.52622	4	61	1.56417e-05	3.87459	3.89745	3.29238	3.09261	3.74853	0.801545	0.863988	-0.788592	-1.3342	0.457259	0.126056	0.148919	-0.456154	-0.655922	1.09131	1.10874	-1.37188	-1.57562	0.819509	0.903154	-2.14242	-3.70306	0.415686	0.369997	0.0361597	0.000460283	0.381234	0.431802	1.44178	3.33697	0.772746	0.772746	0.187289
hsa-miR-491-5p	454	0.0547522	0.0878273	0.142579	0.193882	0.384012	0.615988	0.615408	49.7339	53.7339	53.9408	53.8928	14.0602	4	61	3.46441e-08	5.77155	6.08408	5.25411	5.61192	6.17126	-0.0189511	0.823537	-1.41386	-0.449289	1.05857	-0.399706	-0.0871843	-0.917151	-0.559341	-1.31924	-1.06229	-1.88838	-1.4736	-3.7335	-0.759984	-6.18907	-4.53718	0.000417287	0.450192	5.61019e-08	2.73084e-05	3.37957	0.346603	7.25102	4.5637	0.00423223	0.773256	1.97922e-06
hsa-miR-493-3p	455	0	0.159391	0.159391	0.167241	0	1	0.105588	73.6135	75.6135	75.6813	75.6929	1.8003	4	61	0.140365	3.06439	3.29037	3.12112	2.91314	2.98426	-0.0712526	1.49701	0.322451	-1.12086	-0.627352	0.0801325	0.306116	0.136864	-0.0711134	1.05712	1.23637	1.09951	-1.05053	0.563386	2.05346	0.69459	-0.434792	0.575237	0.0443223	0.48995	0.665248	0.240153	1.35338	0.309848	0.177017	0.885318	0.220158	0.809999
hsa-miR-493-5p	456	0.00436308	0.170024	0.174387	0.167976	0.0250196	0.97498	0.0685936	78.856	82.856	83.0629	83.0148	0.477576	4	61	0.75203	3.01318	3.10936	3.12725	2.91745	2.98524	-0.197689	0.9001	1.10426	-1.29019	-0.516481	0.0279322	0.12412	0.142008	-0.0677919	1.01955	1.08984	1.10344	-1.04811	0.189573	0.800052	0.696009	-0.400036	0.850273	0.426786	0.489066	0.690527	0.0704415	0.36979	0.310632	0.160819	0.945978	0.772746	0.809999
hsa-miR-494-3p	457	0.00259436	0.204701	0.207295	0.199342	0.0125153	0.987485	0.0464596	89.5494	93.5494	93.7563	93.7083	0.419155	4	61	0.794197	2.9747	3.08994	3.12503	2.91538	2.95157	-0.401869	0.862556	1.2476	-1.05272	-0.655571	0.0231227	0.138364	0.173458	-0.0361966	1.01616	1.10066	1.12776	-1.02541	0.143218	0.815652	0.775719	-0.194948	0.88659	0.417873	0.440912	0.846082	0.0522772	0.378956	0.355648	0.0725877	0.945978	0.772746	0.772746
hsa-miR-497-5p	458	0	0.220443	0.220443	0.28219	0	1	0.266887	93.3943	95.3943	95.4621	95.4737	5.5517	4	61	0.000705772	3.23499	3.25392	4.07627	3.47252	3.04352	-0.454227	-0.406785	1.65404	0.14102	-0.934053	0.191468	0.210399	1.03274	0.428992	1.14192	1.15701	2.04591	1.34629	1.14466	1.20013	4.45672	2.2303	0.256821	0.234729	3.62692e-05	0.0294167	0.590369	0.629433	4.44046	1.53141	0.772746	0.732375	0.000526447
hsa-miR-4999-3p	459	0.00259436	0.204701	0.207295	0.199342	0.0125153	0.987485	0.0464596	89.5494	93.5494	93.7563	93.7083	0.419155	4	61	0.794197	2.9747	3.08994	3.12503	2.91538	2.95157	-0.401869	0.862556	1.2476	-1.05272	-0.655571	0.0231227	0.138364	0.173458	-0.0361966	1.01616	1.10066	1.12776	-1.02541	0.143218	0.815652	0.775719	-0.194948	0.88659	0.417873	0.440912	0.846082	0.0522772	0.378956	0.355648	0.0725877	0.945978	0.772746	0.772746
hsa-miR-499a-3p	460	0	0.17989	0.17989	0.172542	0	1	0.0215737	80.9935	82.9935	83.0613	83.0729	0.336253	4	61	0.852494	3.02365	3.0852	3.12112	2.94755	2.95514	-0.0374067	0.761657	1.228	-1.02538	-0.926876	0.0685118	0.13006	0.165981	-0.00758702	1.04863	1.09434	1.12193	-1.00527	0.453411	0.821246	0.79291	-0.0436646	0.651862	0.414704	0.430903	0.965314	0.185844	0.382261	0.36562	0.0153312	0.943915	0.772746	0.772746
hsa-miR-499a-5p	461	0.364631	0.0899817	0.454613	0.426534	0.802069	0.197931	0.824048	63.2313	67.2313	67.4382	67.3902	3.99894	4	61	0.00603676	6.36884	6.12535	6.01508	6.18424	5.96888	1.50134	-0.0453033	-0.745688	0.328784	-1.03913	0.39996	0.156464	0.0461981	0.215359	1.31947	1.11455	1.03254	1.16099	3.68303	1.3398	0.307291	1.72165	0.000490854	0.185282	0.759669	0.0902012	3.30905	0.732168	0.119376	1.04479	0.00485645	0.631678	0.945978
hsa-miR-499b-3p	462	0.00030746	0.197515	0.197822	0.190464	0.00155422	0.998446	0.0281669	86.7815	90.7815	90.9884	90.9404	0.40069	4	61	0.807401	2.98822	3.08577	3.12162	2.91342	2.95471	-0.278491	0.829193	1.23626	-1.12794	-0.65902	0.0335119	0.131062	0.16691	-0.0412961	1.0235	1.0951	1.12265	-1.02904	0.211609	0.789348	0.760807	-0.226762	0.833118	0.432966	0.449704	0.821367	0.0792936	0.363546	0.347074	0.0854628	0.945978	0.772746	0.773256
hsa-miR-5009-5p	463	0.00259436	0.204701	0.207295	0.199342	0.0125153	0.987485	0.0464596	89.5494	93.5494	93.7563	93.7083	0.419155	4	61	0.794197	2.9747	3.08994	3.12503	2.91538	2.95157	-0.401869	0.862556	1.2476	-1.05272	-0.655571	0.0231227	0.138364	0.173458	-0.0361966	1.01616	1.10066	1.12776	-1.02541	0.143218	0.815652	0.775719	-0.194948	0.88659	0.417873	0.440912	0.846082	0.0522772	0.378956	0.355648	0.0725877	0.945978	0.772746	0.772746
hsa-miR-500a-3p	464	0.0623525	0.17061	0.232962	0.277342	0.267651	0.732349	0.471881	87.2899	91.2899	91.4968	91.4488	5.14533	4	61	0.00122544	4.42441	4.57863	5.05699	4.8988	4.35646	-0.785904	-0.278034	1.29728	0.776329	-1.00967	0.0679488	0.222169	0.70053	0.542338	1.04823	1.16649	1.6251	1.45633	0.456006	1.39464	3.39666	3.16139	0.650005	0.168183	0.00120555	0.00244576	0.187083	0.774218	2.91882	2.61159	0.94348	0.590015	0.0108634
hsa-miR-500a-5p	465	0	0.1415	0.1415	0.134001	0	1	0.00901797	66.3509	68.3509	68.4186	68.4303	0.138775	4	61	0.967237	3.13571	3.14057	3.14404	3.04893	3.09276	0.567303	0.68567	0.770001	-1.54483	-0.478144	0.042954	0.0478173	0.0512822	-0.0438267	1.03022	1.0337	1.03619	-1.03084	0.320519	0.340439	0.276222	-0.284395	0.74967	0.734696	0.783311	0.777071	0.12513	0.133892	0.106066	0.109539	0.945978	0.945978	0.945978
hsa-miR-500b-5p	466	0.000115156	0.189264	0.189379	0.181828	0.000608069	0.999392	0.0237033	84.126	88.126	88.3329	88.2848	0.354131	4	61	0.840178	2.99402	3.08543	3.12131	2.93717	2.95496	-0.302908	0.824407	1.26697	-1.00394	-0.784528	0.0390524	0.130461	0.166347	-0.0177912	1.02744	1.09464	1.12221	-1.01241	0.251945	0.802944	0.774675	-0.0998146	0.801931	0.425125	0.441524	0.920819	0.0958632	0.371484	0.355045	0.0358258	0.945978	0.772746	0.772746
hsa-miR-501-3p	467	0	0.166367	0.166367	0.163168	0	1	0.0431377	76.2263	78.2263	78.2941	78.3057	0.687507	4	61	0.60338	2.98886	3.11808	3.23413	2.99023	2.97537	-0.643271	0.503636	1.53368	-0.631076	-0.762969	0.0134861	0.142706	0.258759	0.01486	1.00939	1.10397	1.19645	1.01035	0.0928073	0.937004	1.28538	0.0889302	0.926361	0.352451	0.203517	0.929429	0.0332198	0.452901	0.691399	0.0317839	0.964976	0.772746	0.675788
hsa-miR-501-5p	468	0.0225931	0.153527	0.17612	0.18443	0.128283	0.871717	0.267025	76.7496	80.7496	80.9565	80.9085	2.6522	4	61	0.041487	3.4408	3.14234	3.26216	3.02022	3.11063	1.51304	-0.325843	0.412368	-1.07833	-0.521239	0.330164	0.0317129	0.151525	-0.0904157	1.25716	1.02223	1.11074	-1.06468	2.34346	0.211684	0.77705	-0.557658	0.0223816	0.833059	0.440132	0.579119	1.65011	0.0793241	0.356417	0.237233	0.127056	0.945978	0.772746
hsa-miR-502-3p	469	0.0462017	0.135743	0.181945	0.233822	0.253932	0.746068	0.500734	72.978	76.978	77.1849	77.1369	7.82098	4	61	3.72224e-05	4.58186	4.68091	5.24344	5.16691	4.58974	-0.832054	-0.527623	1.20136	0.966148	-0.807832	-0.00788075	0.0911669	0.653699	0.577172	-1.00548	1.06523	1.5732	1.49192	-0.0593054	0.641963	3.55421	3.77279	0.952903	0.523302	0.000738943	0.000367446	0.0209514	0.281247	3.13139	3.43481	0.975356	0.839923	0.00705196
hsa-miR-502-5p	470	0.00259436	0.204701	0.207295	0.199342	0.0125153	0.987485	0.0464596	89.5494	93.5494	93.7563	93.7083	0.419155	4	61	0.794197	2.9747	3.08994	3.12503	2.91538	2.95157	-0.401869	0.862556	1.2476	-1.05272	-0.655571	0.0231227	0.138364	0.173458	-0.0361966	1.01616	1.10066	1.12776	-1.02541	0.143218	0.815652	0.775719	-0.194948	0.88659	0.417873	0.440912	0.846082	0.0522772	0.378956	0.355648	0.0725877	0.945978	0.772746	0.772746
hsa-miR-503-3p	471	0.166326	0.139958	0.306284	0.340789	0.543045	0.456955	0.654536	82.0864	86.0864	86.2933	86.2453	5.59175	4	61	0.00066869	3.60208	3.28749	3.80491	3.5101	3.09957	0.514622	-0.63155	1.25364	0.179514	-1.31623	0.502511	0.187923	0.705349	0.410534	1.41668	1.13912	1.63054	1.32918	3.71407	1.29378	3.76604	2.63461	0.000444267	0.200619	0.000375585	0.0106627	3.35236	0.697627	3.42529	1.97213	0.00445001	0.668915	0.00384142
hsa-miR-503-5p	472	1.23852	0.194889	1.43341	1.73568	0.864038	0.135962	0.90648	113.446	117.446	117.652	117.604	27.3778	4	61	4.98559e-13	4.68591	4.27742	5.83599	5.38406	4.00417	-0.198767	-0.734357	1.30915	0.716599	-1.09262	0.681742	0.273249	1.83182	1.37989	1.60408	1.20853	3.55987	2.60248	4.26502	1.58919	8.2778	7.49424	7.06743e-05	0.117188	1.46518e-11	3.26847e-10	4.15074	0.931118	10.8341	9.48565	0.000931057	0.461141	2.53685e-09
hsa-miR-505-3p	473	0.0112866	0.143805	0.155091	0.154046	0.0727739	0.927226	0.162511	70.7339	74.7339	74.9408	74.8928	1.16942	4	61	0.333187	3.10638	3.11393	3.40691	3.10648	3.00178	-0.266966	-0.217507	1.70368	-0.266327	-0.952877	0.104601	0.112144	0.405124	0.104699	1.0752	1.08083	1.3242	1.07527	0.769098	0.778625	2.15188	0.669116	0.444803	0.439211	0.0353736	0.505946	0.351833	0.357327	1.45132	0.295896	0.772746	0.772746	0.185589
hsa-miR-505-5p	474	7.78707e-05	0.18928	0.189358	0.182536	0.000411235	0.999589	0.0272324	84.1203	88.1203	88.3272	88.2792	0.415851	4	61	0.796566	3.03549	3.08535	3.12124	2.91323	2.95501	0.154105	0.726383	1.13834	-1.24916	-0.769672	0.0804824	0.130341	0.166232	-0.0417745	1.05737	1.09455	1.12212	-1.02938	0.519221	0.802227	0.774127	-0.234366	0.605485	0.425536	0.441846	0.815486	0.217896	0.371063	0.354729	0.0885836	0.90879	0.772746	0.772746
hsa-miR-5100	475	0	0.151062	0.151062	0.161546	0	1	0.122444	70.3394	72.3394	72.4072	72.4188	2.12781	4	61	0.0881372	3.36808	3.0852	3.12112	3.03332	3.05449	1.73494	-0.347834	-0.0833564	-0.729834	-0.573918	0.313582	0.030706	0.0666264	-0.021176	1.24279	1.02151	1.04726	-1.01479	2.26466	0.211582	0.347328	-0.132993	0.0270985	0.833138	0.729541	0.894637	1.56706	0.0792828	0.136951	0.0483533	0.146993	0.945978	0.945978
hsa-miR-510-3p	476	0.0149586	0.232082	0.247041	0.245426	0.0605511	0.939449	0.147043	99.4331	103.433	103.64	103.592	1.20355	4	61	0.318533	2.97312	3.18736	3.31045	2.92585	2.94314	-0.552715	0.695533	1.41273	-0.828147	-0.7274	0.0299813	0.244219	0.367311	-0.0172913	1.021	1.18445	1.28995	-1.01206	0.173657	1.33738	1.53687	-0.0870595	0.86271	0.186064	0.129496	0.930909	0.0641352	0.730337	0.887743	0.0310926	0.945978	0.633455	0.493552
hsa-miR-532-3p	477	0.0320572	0.136829	0.168887	0.214028	0.189815	0.810185	0.444728	71.6609	75.6609	75.8678	75.8197	7.86933	4	61	3.505e-05	4.0234	3.46348	3.48738	3.40008	3.48973	1.77068	-0.429645	-0.335724	-0.678812	-0.326499	0.53367	-0.0262476	-0.00234765	-0.0896533	1.44761	-1.01836	-1.00163	-1.06411	4.00515	-0.184708	-0.01273	-0.584542	0.000170826	0.854071	0.989885	0.561011	3.76744	0.0685062	0.00441535	0.251028	0.00195322	0.945978	0.996546
hsa-miR-532-5p	478	0.0298625	0.0642224	0.0940848	0.107808	0.3174	0.6826	0.491347	28.9797	32.9797	33.1866	33.1386	5.10547	4	61	0.00129409	7.21245	7.47031	7.66145	7.5272	7.42064	-1.49671	0.0724192	1.23554	0.418596	-0.229851	-0.208185	0.0496726	0.240811	0.106561	-1.15523	1.03503	1.18166	1.07666	-2.27563	0.507307	1.90175	1.01164	0.0263929	0.613769	0.0619288	0.315705	1.57851	0.211995	1.20811	0.500719	0.144172	0.912746	0.28431
hsa-miR-542-3p	479	0.165222	0.266674	0.431896	0.452257	0.38255	0.61745	0.499328	117.448	121.448	121.655	121.607	3.54382	4	61	0.0115252	3.6429	3.31211	3.66031	3.33804	2.99241	0.920624	-0.279533	0.983809	-0.18544	-1.43946	0.650491	0.319701	0.667906	0.345635	1.5697	1.24807	1.58877	1.27071	3.48696	1.59937	2.58661	1.60901	0.000912004	0.114905	0.0120939	0.112778	3.04	0.939662	1.91743	0.947776	0.0085686	0.455857	0.0775546
hsa-miR-542-5p	480	0.0013991	0.200675	0.202074	0.194439	0.00692368	0.993076	0.0373002	88.0423	92.0423	92.2492	92.2012	0.409334	4	61	0.801231	2.98179	3.08779	3.12332	2.91437	2.9532	-0.338616	0.845779	1.24283	-1.09196	-0.65803	0.0285859	0.134583	0.170117	-0.0388344	1.02001	1.09778	1.12515	-1.02728	0.178948	0.802687	0.768825	-0.211398	0.858572	0.425272	0.444964	0.833282	0.0662234	0.371333	0.351675	0.0792082	0.945978	0.772746	0.772746
hsa-miR-543	481	0.00259436	0.204701	0.207295	0.199342	0.0125153	0.987485	0.0464596	89.5494	93.5494	93.7563	93.7083	0.419155	4	61	0.794197	2.9747	3.08994	3.12503	2.91538	2.95157	-0.401869	0.862556	1.2476	-1.05272	-0.655571	0.0231227	0.138364	0.173458	-0.0361966	1.01616	1.10066	1.12776	-1.02541	0.143218	0.815652	0.775719	-0.194948	0.88659	0.417873	0.440912	0.846082	0.0522772	0.378956	0.355648	0.0725877	0.945978	0.772746	0.772746
hsa-miR-548-3p	482	0.00452991	0.155622	0.160152	0.152552	0.0282851	0.971715	0.0633258	73.6147	77.6147	77.8216	77.7736	0.28507	4	61	0.886568	3.0234	3.09811	3.12817	2.95911	3.03183	-0.371617	0.751306	1.20311	-1.33791	-0.244889	-0.00843146	0.0662788	0.0963381	-0.0727207	-1.00586	1.04701	1.06906	-1.0517	-0.0597933	0.446185	0.493397	-0.448382	0.952516	0.657043	0.623504	0.655466	0.0211279	0.182406	0.205161	0.18345	0.975356	0.945978	0.923684
hsa-miR-548a	483	0	0.169417	0.169417	0.16249	0	1	0.0215299	77.3347	79.3347	79.4025	79.4141	0.335556	4	61	0.852971	3.01751	3.0852	3.12112	2.95727	2.95514	-0.130261	0.775079	1.2555	-0.935897	-0.964419	0.062369	0.13006	0.165981	0.00213255	1.04418	1.09434	1.12193	1.00148	0.425323	0.846248	0.81705	0.0126468	0.672098	0.400722	0.41708	0.989951	0.172568	0.397157	0.379781	0.00438638	0.945978	0.772746	0.772746
hsa-miR-548ac	484	0.00300726	0.191833	0.19484	0.187257	0.0154345	0.984565	0.0508591	85.7395	89.7395	89.9464	89.8984	0.41759	4	61	0.79532	2.98792	3.09069	3.12567	2.91586	2.96132	-0.320183	0.839512	1.23432	-1.13327	-0.620372	0.0266018	0.12937	0.164357	-0.0454516	1.01861	1.09382	1.12067	-1.03201	0.170146	0.787117	0.759048	-0.252779	0.865459	0.434261	0.450747	0.801289	0.0627537	0.362249	0.346067	0.0962107	0.945978	0.772746	0.773256
hsa-miR-548ad-5p	485	0.00759237	0.182056	0.189648	0.184032	0.0400339	0.959966	0.0981482	83.7323	87.7323	87.9392	87.8912	0.666676	4	61	0.617578	3.03688	3.12121	3.19518	2.93439	2.94465	-0.0851123	0.663781	1.32069	-0.995211	-0.904148	0.0922315	0.176564	0.250539	-0.0102545	1.06602	1.13019	1.18965	-1.00713	0.604093	1.09599	1.18522	-0.0583908	0.548022	0.277393	0.240527	0.953628	0.261202	0.556904	0.618836	0.0206209	0.86171	0.772746	0.742723
hsa-miR-548ae-3p	486	0.0409715	0.160137	0.201108	0.191782	0.203729	0.796271	0.276538	81.662	85.662	85.8689	85.8209	0.618175	4	61	0.651241	3.15946	3.15037	3.27221	3.30623	3.06984	-0.333566	-0.427791	0.835731	1.18848	-1.26285	0.0896124	0.0805262	0.202369	0.236385	1.06408	1.0574	1.15059	1.17804	0.621471	0.523378	1.01401	1.42416	0.536605	0.602607	0.314582	0.159496	0.270345	0.219966	0.502267	0.797251	0.853498	0.905592	0.772746
hsa-miR-548ae-5p	487	0.001724	0.15101	0.152734	0.147678	0.0112876	0.988712	0.0495561	70.929	74.929	75.1359	75.0879	0.492603	4	61	0.741147	3.02717	3.11803	3.12378	2.92703	3.00492	-0.157641	0.942876	1.01249	-1.37061	-0.427115	0.0222476	0.113105	0.118853	-0.0778942	1.01554	1.08155	1.08587	-1.05548	0.160459	0.776576	0.618916	-0.488518	0.87305	0.44041	0.538276	0.626934	0.0589609	0.356143	0.268995	0.202778	0.945978	0.772746	0.855034
hsa-miR-548ah-3p	488	0.00259436	0.204701	0.207295	0.199342	0.0125153	0.987485	0.0464596	89.5494	93.5494	93.7563	93.7083	0.419155	4	61	0.794197	2.9747	3.08994	3.12503	2.91538	2.95157	-0.401869	0.862556	1.2476	-1.05272	-0.655571	0.0231227	0.138364	0.173458	-0.0361966	1.01616	1.10066	1.12776	-1.02541	0.143218	0.815652	0.775719	-0.194948	0.88659	0.417873	0.440912	0.846082	0.0522772	0.378956	0.355648	0.0725877	0.945978	0.772746	0.772746
hsa-miR-548aj-3p	489	0.0594826	0.142642	0.202125	0.200015	0.294286	0.705714	0.389615	77.0654	81.0654	81.2723	81.2242	1.51151	4	61	0.210019	3.10578	3.23334	3.47448	3.25831	3.0694	-0.767779	0.0318425	1.54346	0.188353	-0.995873	0.0363869	0.163947	0.405089	0.188915	1.02554	1.12035	1.32417	1.13991	0.266959	1.12439	2.14724	1.20382	0.790401	0.265252	0.0357573	0.23331	0.102152	0.576342	1.44664	0.632067	0.945978	0.772746	0.185999
hsa-miR-548aj-5p	490	0.145027	0.604058	0.749085	0.72239	0.193605	0.806395	0.27423	162.354	166.354	166.56	166.512	1.60579	4	61	0.184321	3.29369	3.72198	3.91353	3.5305	3.16016	-0.750707	0.645506	1.26993	0.0212741	-1.186	0.133529	0.561825	0.75337	0.370339	1.09697	1.47614	1.68573	1.29266	0.476905	1.88125	1.94408	1.14909	0.635134	0.0647124	0.0565021	0.255004	0.197135	1.18901	1.24794	0.593454	0.931871	0.293751	0.265944
hsa-miR-548an	491	0.00259436	0.204701	0.207295	0.199342	0.0125153	0.987485	0.0464596	89.5494	93.5494	93.7563	93.7083	0.419155	4	61	0.794197	2.9747	3.08994	3.12503	2.91538	2.95157	-0.401869	0.862556	1.2476	-1.05272	-0.655571	0.0231227	0.138364	0.173458	-0.0361966	1.01616	1.10066	1.12776	-1.02541	0.143218	0.815652	0.775719	-0.194948	0.88659	0.417873	0.440912	0.846082	0.0522772	0.378956	0.355648	0.0725877	0.945978	0.772746	0.772746
hsa-miR-548ao-5p	492	0.00259436	0.204701	0.207295	0.199342	0.0125153	0.987485	0.0464596	89.5494	93.5494	93.7563	93.7083	0.419155	4	61	0.794197	2.9747	3.08994	3.12503	2.91538	2.95157	-0.401869	0.862556	1.2476	-1.05272	-0.655571	0.0231227	0.138364	0.173458	-0.0361966	1.01616	1.10066	1.12776	-1.02541	0.143218	0.815652	0.775719	-0.194948	0.88659	0.417873	0.440912	0.846082	0.0522772	0.378956	0.355648	0.0725877	0.945978	0.772746	0.772746
hsa-miR-548ap-3p-548t-3p-548aa	493	0	0.117646	0.117646	0.116747	0	1	0.0543061	55.089	57.089	57.1568	57.1685	0.875725	4	61	0.483812	3.41192	3.46824	3.56965	3.42183	3.61355	-0.943159	-0.319135	0.804614	-0.833342	1.29102	-0.201628	-0.145312	-0.0438968	-0.191717	-1.15	-1.10597	-1.03089	-1.14212	-1.65003	-1.1346	-0.259307	-1.36438	0.104078	0.260981	0.796271	0.177462	0.982641	0.583391	0.0989389	0.750895	0.425606	0.772746	0.945978
hsa-miR-548aq-3p	494	0.59585	0.104371	0.70022	0.644238	0.850946	0.149054	0.865032	74.6174	78.6174	78.8243	78.7762	11.7273	4	61	3.96589e-07	7.66641	7.33945	8.03342	7.76254	7.13657	0.222565	-0.701703	1.26002	0.494303	-1.27518	0.529844	0.202875	0.896854	0.625974	1.44377	1.15099	1.862	1.54325	4.52968	1.61246	5.53825	4.6458	2.80434e-05	0.112025	6.86677e-07	1.8556e-05	4.55217	0.950685	6.16325	4.73152	0.00044141	0.45033	1.78979e-05
hsa-miR-548ar-5p	495	0.0214374	0.198024	0.219462	0.214708	0.0976815	0.902318	0.180323	91.2008	95.2008	95.4077	95.3597	1.08134	4	61	0.373678	2.97412	3.21817	3.15787	2.92959	2.9618	-0.569284	1.30337	0.840649	-0.910957	-0.663781	0.0123152	0.256367	0.196063	-0.0322129	1.00857	1.19447	1.14557	-1.02258	0.077063	1.51172	0.88638	-0.175184	0.938826	0.135768	0.378894	0.861516	0.0274151	0.867203	0.421483	0.0647369	0.969776	0.508032	0.772746
hsa-miR-548as-3p	496	0.00259436	0.204701	0.207295	0.199342	0.0125153	0.987485	0.0464596	89.5494	93.5494	93.7563	93.7083	0.419155	4	61	0.794197	2.9747	3.08994	3.12503	2.91538	2.95157	-0.401869	0.862556	1.2476	-1.05272	-0.655571	0.0231227	0.138364	0.173458	-0.0361966	1.01616	1.10066	1.12776	-1.02541	0.143218	0.815652	0.775719	-0.194948	0.88659	0.417873	0.440912	0.846082	0.0522772	0.378956	0.355648	0.0725877	0.945978	0.772746	0.772746
hsa-miR-548at-3p	497	0.00259436	0.204701	0.207295	0.199342	0.0125153	0.987485	0.0464596	89.5494	93.5494	93.7563	93.7083	0.419155	4	61	0.794197	2.9747	3.08994	3.12503	2.91538	2.95157	-0.401869	0.862556	1.2476	-1.05272	-0.655571	0.0231227	0.138364	0.173458	-0.0361966	1.01616	1.10066	1.12776	-1.02541	0.143218	0.815652	0.775719	-0.194948	0.88659	0.417873	0.440912	0.846082	0.0522772	0.378956	0.355648	0.0725877	0.945978	0.772746	0.772746
hsa-miR-548at-5p	498	0.0374953	0.155452	0.192947	0.182552	0.19433	0.80567	0.260993	79.5774	83.5774	83.7843	83.7363	0.639162	4	61	0.636577	3.4652	3.47479	3.51284	3.38027	3.28154	0.456001	0.559465	0.969965	-0.460146	-1.52529	0.183653	0.193243	0.231294	0.0987316	1.13576	1.14333	1.17389	1.07083	1.29297	1.27547	1.17653	0.603874	0.200896	0.206978	0.243954	0.548167	0.697028	0.684076	0.612692	0.261087	0.668918	0.682604	0.748537
hsa-miR-548au-5p-548c-5p-548o-5p-548am-5p	499	0.0264919	0.189123	0.215615	0.199638	0.122867	0.877133	0.164606	89.2861	93.2861	93.493	93.445	0.0633102	4	61	0.992428	3.35739	3.35384	3.4528	3.3693	3.3674	-0.553243	-0.639562	1.76619	-0.263575	-0.30981	-0.0100138	-0.0135646	0.0853977	0.00190189	-1.00697	-1.00945	1.06098	1.00132	-0.0640518	-0.0816215	0.394653	0.0105713	0.949138	0.935215	0.694475	0.9916	0.0226705	0.0290886	0.158343	0.00366348	0.975148	0.968373	0.945978
hsa-miR-548aw	500	0.00259436	0.204701	0.207295	0.199342	0.0125153	0.987485	0.0464596	89.5494	93.5494	93.7563	93.7083	0.419155	4	61	0.794197	2.9747	3.08994	3.12503	2.91538	2.95157	-0.401869	0.862556	1.2476	-1.05272	-0.655571	0.0231227	0.138364	0.173458	-0.0361966	1.01616	1.10066	1.12776	-1.02541	0.143218	0.815652	0.775719	-0.194948	0.88659	0.417873	0.440912	0.846082	0.0522772	0.378956	0.355648	0.0725877	0.945978	0.772746	0.772746
hsa-miR-548az-3p	501	0.0817009	0.130147	0.211848	0.20784	0.385658	0.614342	0.468429	73.7652	77.7652	77.9721	77.9241	2.10207	4	61	0.0914405	3.71568	3.62319	3.33611	3.41038	3.51714	1.26797	0.667126	-1.19788	-0.715403	-0.0218056	0.19854	0.10605	-0.181038	-0.106768	1.14754	1.07628	-1.1337	-1.07681	1.5234	0.759376	-1.00357	-0.711445	0.132827	0.450552	0.319552	0.47952	0.876715	0.346255	0.495458	0.319193	0.502296	0.773256	0.772746
hsa-miR-548d-5p	502	0.00259436	0.204701	0.207295	0.199342	0.0125153	0.987485	0.0464596	89.5494	93.5494	93.7563	93.7083	0.419155	4	61	0.794197	2.9747	3.08994	3.12503	2.91538	2.95157	-0.401869	0.862556	1.2476	-1.05272	-0.655571	0.0231227	0.138364	0.173458	-0.0361966	1.01616	1.10066	1.12776	-1.02541	0.143218	0.815652	0.775719	-0.194948	0.88659	0.417873	0.440912	0.846082	0.0522772	0.378956	0.355648	0.0725877	0.945978	0.772746	0.772746
hsa-miR-548g-5p	503	0	0.159706	0.159706	0.155309	0	1	0.0349704	73.7338	75.7338	75.8016	75.8133	0.552624	4	61	0.697823	3.04121	3.12758	3.12112	2.91314	3.0073	-0.00975319	0.965232	0.892322	-1.45532	-0.392484	0.0339062	0.12028	0.113821	-0.0941565	1.02378	1.08695	1.08209	-1.06744	0.238148	0.806058	0.577076	-0.575112	0.812564	0.423341	0.566012	0.567331	0.0901423	0.37331	0.247174	0.246163	0.945978	0.772746	0.87722
hsa-miR-548h-3p	504	0	0.182863	0.182863	0.176356	0	1	0.0269111	81.9932	83.9932	84.061	84.0727	0.421744	4	61	0.792339	3.02328	3.0852	3.12112	2.91314	2.95514	0.042709	0.756342	1.17035	-1.22672	-0.742678	0.0681429	0.13006	0.165981	-0.0419972	1.04837	1.09434	1.12193	-1.02954	0.447288	0.814544	0.786439	-0.239729	0.656251	0.418502	0.434655	0.811344	0.18293	0.378302	0.361855	0.0907947	0.945978	0.772746	0.772746
hsa-miR-548h-5p	505	0.315432	0.117956	0.433388	0.41195	0.727828	0.272172	0.760718	76.944	80.944	81.1509	81.1029	1.53491	4	61	0.203346	4.6474	4.83676	4.98654	4.67582	4.80185	-1.04373	0.345429	1.44421	-0.835218	0.0893042	-0.15445	0.0349139	0.184696	-0.126027	-1.113	1.0245	1.13658	-1.09128	-1.24249	0.261279	1.07327	-0.880192	0.218812	0.794757	0.287379	0.38221	0.65993	0.0997655	0.541544	0.417698	0.704381	0.945978	0.772746
hsa-miR-548l	506	0	0.154344	0.154344	0.148442	0	1	0.0242296	71.6504	73.6504	73.7182	73.7298	0.378677	4	61	0.823006	3.02438	3.13389	3.12112	3.02796	2.97537	-0.47175	1.13446	0.947152	-0.419239	-1.19063	0.0490108	0.158517	0.145747	0.0525907	1.03456	1.11614	1.1063	1.03713	0.350168	1.0806	0.751668	0.326759	0.727419	0.284129	0.455141	0.744969	0.138216	0.546485	0.341854	0.127862	0.945978	0.772746	0.777673
hsa-miR-548u	507	0.77381	0.177766	0.951577	0.856173	0.813187	0.186813	0.826872	105.25	109.25	109.457	109.409	4.99625	4	61	0.00150313	4.03708	3.78548	4.09302	4.2638	3.56613	0.320753	-0.596553	0.524718	1.14734	-1.39626	0.470945	0.219345	0.52689	0.697663	1.38602	1.1642	1.44082	1.62188	3.0853	1.33619	2.49335	3.96794	0.00305513	0.186451	0.015383	0.000193419	2.51497	0.729435	1.81296	3.7135	0.0240443	0.633882	0.0948053
hsa-miR-548x-5p	508	0.00320588	0.198707	0.201913	0.194066	0.0158775	0.984122	0.0516626	87.9097	91.9097	92.1166	92.0685	0.420526	4	61	0.793214	2.97476	3.09092	3.12592	2.9158	2.96129	-0.433076	0.857527	1.2464	-1.08812	-0.582732	0.0134698	0.12963	0.16463	-0.045487	1.00938	1.09401	1.12088	-1.03203	0.0846454	0.774834	0.747011	-0.248548	0.932821	0.441431	0.457927	0.804545	0.0302019	0.355137	0.339204	0.0944495	0.967245	0.772746	0.777998
hsa-miR-548z	509	0.00259436	0.204701	0.207295	0.199342	0.0125153	0.987485	0.0464596	89.5494	93.5494	93.7563	93.7083	0.419155	4	61	0.794197	2.9747	3.08994	3.12503	2.91538	2.95157	-0.401869	0.862556	1.2476	-1.05272	-0.655571	0.0231227	0.138364	0.173458	-0.0361966	1.01616	1.10066	1.12776	-1.02541	0.143218	0.815652	0.775719	-0.194948	0.88659	0.417873	0.440912	0.846082	0.0522772	0.378956	0.355648	0.0725877	0.945978	0.772746	0.772746
hsa-miR-550a-5p	510	0.00259436	0.204701	0.207295	0.199342	0.0125153	0.987485	0.0464596	89.5494	93.5494	93.7563	93.7083	0.419155	4	61	0.794197	2.9747	3.08994	3.12503	2.91538	2.95157	-0.401869	0.862556	1.2476	-1.05272	-0.655571	0.0231227	0.138364	0.173458	-0.0361966	1.01616	1.10066	1.12776	-1.02541	0.143218	0.815652	0.775719	-0.194948	0.88659	0.417873	0.440912	0.846082	0.0522772	0.378956	0.355648	0.0725877	0.945978	0.772746	0.772746
hsa-miR-550b-2-5p	511	0.00259436	0.204701	0.207295	0.199342	0.0125153	0.987485	0.0464596	89.5494	93.5494	93.7563	93.7083	0.419155	4	61	0.794197	2.9747	3.08994	3.12503	2.91538	2.95157	-0.401869	0.862556	1.2476	-1.05272	-0.655571	0.0231227	0.138364	0.173458	-0.0361966	1.01616	1.10066	1.12776	-1.02541	0.143218	0.815652	0.775719	-0.194948	0.88659	0.417873	0.440912	0.846082	0.0522772	0.378956	0.355648	0.0725877	0.945978	0.772746	0.772746
hsa-miR-551a	512	0.00259436	0.204701	0.207295	0.199342	0.0125153	0.987485	0.0464596	89.5494	93.5494	93.7563	93.7083	0.419155	4	61	0.794197	2.9747	3.08994	3.12503	2.91538	2.95157	-0.401869	0.862556	1.2476	-1.05272	-0.655571	0.0231227	0.138364	0.173458	-0.0361966	1.01616	1.10066	1.12776	-1.02541	0.143218	0.815652	0.775719	-0.194948	0.88659	0.417873	0.440912	0.846082	0.0522772	0.378956	0.355648	0.0725877	0.945978	0.772746	0.772746
hsa-miR-5690	513	0.0289965	0.109106	0.138103	0.172951	0.209963	0.790037	0.453978	58.4351	62.4351	62.642	62.594	7.14447	4	61	8.73071e-05	3.46842	3.24747	3.95357	3.76696	3.39867	-0.343498	-1.11324	1.34668	0.696551	-0.586494	0.0697498	-0.151197	0.554899	0.368286	1.04953	-1.11049	1.46907	1.29082	0.585947	-1.19012	3.36803	2.68769	0.560073	0.238612	0.00131594	0.00926106	0.251756	0.622309	2.88076	2.03334	0.873627	0.739166	0.0116844
hsa-miR-5697	514	0.00259436	0.204701	0.207295	0.199342	0.0125153	0.987485	0.0464596	89.5494	93.5494	93.7563	93.7083	0.419155	4	61	0.794197	2.9747	3.08994	3.12503	2.91538	2.95157	-0.401869	0.862556	1.2476	-1.05272	-0.655571	0.0231227	0.138364	0.173458	-0.0361966	1.01616	1.10066	1.12776	-1.02541	0.143218	0.815652	0.775719	-0.194948	0.88659	0.417873	0.440912	0.846082	0.0522772	0.378956	0.355648	0.0725877	0.945978	0.772746	0.772746
hsa-miR-570-5p	515	0.00259436	0.204701	0.207295	0.199342	0.0125153	0.987485	0.0464596	89.5494	93.5494	93.7563	93.7083	0.419155	4	61	0.794197	2.9747	3.08994	3.12503	2.91538	2.95157	-0.401869	0.862556	1.2476	-1.05272	-0.655571	0.0231227	0.138364	0.173458	-0.0361966	1.01616	1.10066	1.12776	-1.02541	0.143218	0.815652	0.775719	-0.194948	0.88659	0.417873	0.440912	0.846082	0.0522772	0.378956	0.355648	0.0725877	0.945978	0.772746	0.772746
hsa-miR-574-3p	516	0.047272	0.154695	0.201967	0.232159	0.234057	0.765943	0.42539	80.4087	84.4087	84.6156	84.5675	4.76287	4	61	0.00207351	4.48061	3.96771	3.88401	4.20607	4.11361	1.50765	-0.700376	-1.06073	0.325737	-0.0722814	0.367002	-0.1459	-0.229606	0.0924558	1.28967	-1.10642	-1.17251	1.06618	2.58801	-0.963266	-1.16983	0.566347	0.0120498	0.339217	0.24662	0.573236	1.91902	0.469522	0.607972	0.241667	0.0774765	0.772746	0.754805
hsa-miR-574-5p	517	0.00259436	0.204701	0.207295	0.199342	0.0125153	0.987485	0.0464596	89.5494	93.5494	93.7563	93.7083	0.419155	4	61	0.794197	2.9747	3.08994	3.12503	2.91538	2.95157	-0.401869	0.862556	1.2476	-1.05272	-0.655571	0.0231227	0.138364	0.173458	-0.0361966	1.01616	1.10066	1.12776	-1.02541	0.143218	0.815652	0.775719	-0.194948	0.88659	0.417873	0.440912	0.846082	0.0522772	0.378956	0.355648	0.0725877	0.945978	0.772746	0.772746
hsa-miR-576-3p	518	0	0.109107	0.109107	0.104605	0	1	0.0211409	50.4927	52.4927	52.5605	52.5721	0.329362	4	61	0.857192	3.12758	3.10164	3.24586	3.11583	3.06287	-0.0461565	-0.423182	1.67284	-0.216932	-0.986573	0.0647086	0.0387661	0.18299	0.0529578	1.04587	1.02723	1.13523	1.03739	0.549876	0.31431	1.12246	0.39135	0.584412	0.754358	0.266065	0.696902	0.233281	0.122422	0.575013	0.156828	0.889812	0.945978	0.772746
hsa-miR-576-5p	519	0.0515166	0.134545	0.186062	0.188313	0.27688	0.72312	0.387288	73.047	77.047	77.2539	77.2059	2.34381	4	61	0.0646654	4.18487	3.99571	3.96538	3.85008	3.83496	1.5521	0.209469	-0.00581375	-0.824248	-0.931505	0.349906	0.160748	0.130417	0.0151111	1.27448	1.11787	1.09461	1.01053	2.64392	1.13588	0.711978	0.0991752	0.0104036	0.26045	0.479193	0.921324	1.98282	0.584276	0.31949	0.0355874	0.0689024	0.772746	0.801073
hsa-miR-580-5p	520	0.00259436	0.204701	0.207295	0.199342	0.0125153	0.987485	0.0464596	89.5494	93.5494	93.7563	93.7083	0.419155	4	61	0.794197	2.9747	3.08994	3.12503	2.91538	2.95157	-0.401869	0.862556	1.2476	-1.05272	-0.655571	0.0231227	0.138364	0.173458	-0.0361966	1.01616	1.10066	1.12776	-1.02541	0.143218	0.815652	0.775719	-0.194948	0.88659	0.417873	0.440912	0.846082	0.0522772	0.378956	0.355648	0.0725877	0.945978	0.772746	0.772746
hsa-miR-582-3p	521	0	0.134343	0.134343	0.132946	0	1	0.0516748	63.1847	65.1847	65.2525	65.2642	0.830981	4	61	0.51069	3.19247	3.21029	3.31094	3.17493	3.02037	0.102019	0.272536	1.23541	-0.0657024	-1.54427	0.172095	0.18992	0.290574	0.154562	1.12669	1.1407	1.22313	1.11308	1.31792	1.3877	1.60627	1.02933	0.192458	0.170278	0.113379	0.307387	0.715663	0.768842	0.945469	0.512315	0.646459	0.594746	0.452768
hsa-miR-582-5p	522	0	0.18754	0.18754	0.180719	0	1	0.0261203	83.5339	85.5339	85.6017	85.6133	0.409018	4	61	0.801457	3.00901	3.0852	3.12112	2.91314	2.95514	-0.088784	0.788489	1.2021	-1.19269	-0.709111	0.0538727	0.13006	0.165981	-0.0419972	1.03805	1.09434	1.12193	-1.02954	0.349182	0.804322	0.77657	-0.23672	0.728155	0.424335	0.440413	0.813667	0.137776	0.372292	0.35614	0.0895533	0.945978	0.772746	0.772746
hsa-miR-584-3p	523	0.00312898	0.126274	0.129403	0.126393	0.0241801	0.97582	0.0801601	60.6684	64.6684	64.8753	64.8273	0.672869	4	61	0.613339	3.30998	3.13069	3.14094	3.24612	3.1908	1.41602	-0.972894	-0.836322	0.565118	-0.171926	0.119178	-0.0601139	-0.049864	0.0553163	1.08612	-1.04255	-1.03517	1.03909	0.938647	-0.449722	-0.283608	0.378802	0.351614	0.654505	0.777671	0.70615	0.453934	0.184087	0.109204	0.151103	0.772746	0.945978	0.945978
hsa-miR-584-5p	524	0.258939	0.047117	0.306056	0.28568	0.846051	0.153949	0.862585	25.8425	29.8425	30.0494	30.0014	8.52318	4	61	1.56996e-05	9.30183	8.92794	8.88131	9.03158	8.98328	1.67981	-0.590482	-0.873681	0.0388158	-0.25446	0.318545	-0.0553379	-0.101977	0.0482982	1.24707	-1.0391	-1.07324	1.03404	4.05318	-0.654632	-0.937255	0.533509	0.000145404	0.515166	0.352324	0.59562	3.83742	0.288053	0.453058	0.225031	0.00171932	0.833007	0.772746
hsa-miR-590-3p	525	0.329101	0.0522325	0.381334	0.357196	0.863027	0.136973	0.878208	33.0664	37.0664	37.2733	37.2253	0.65612	4	61	0.624836	5.9591	5.94734	6.03717	5.96331	5.86492	0.0772955	-0.114742	1.35173	0.145986	-1.46027	0.0941864	0.0824227	0.172254	0.0983941	1.06746	1.05879	1.12682	1.07058	1.13819	0.925956	1.50358	1.03223	0.259494	0.358118	0.137851	0.306039	0.585873	0.445974	0.860591	0.514223	0.772746	0.772746	0.512314
hsa-miR-598-3p	526	0.036514	0.135065	0.171579	0.181743	0.212811	0.787189	0.357059	71.5358	75.5358	75.7427	75.6947	2.59961	4	61	0.0447524	3.4964	3.80569	3.42772	3.38898	3.57624	-0.257869	1.61393	-0.673504	-0.907924	0.225364	-0.0798486	0.229445	-0.148528	-0.187263	-1.05691	1.17238	-1.10844	-1.1386	-0.602852	1.62297	-0.810207	-1.2282	0.548842	0.109754	0.420971	0.224089	0.260553	0.95958	0.375748	0.649579	0.862212	0.442668	0.772746
hsa-miR-605-3p	527	0.00259436	0.204701	0.207295	0.199342	0.0125153	0.987485	0.0464596	89.5494	93.5494	93.7563	93.7083	0.419155	4	61	0.794197	2.9747	3.08994	3.12503	2.91538	2.95157	-0.401869	0.862556	1.2476	-1.05272	-0.655571	0.0231227	0.138364	0.173458	-0.0361966	1.01616	1.10066	1.12776	-1.02541	0.143218	0.815652	0.775719	-0.194948	0.88659	0.417873	0.440912	0.846082	0.0522772	0.378956	0.355648	0.0725877	0.945978	0.772746	0.772746
hsa-miR-605-5p	528	0.00231821	0.195481	0.197799	0.190229	0.01172	0.98828	0.0451928	86.6966	90.6966	90.9035	90.8555	0.417406	4	61	0.795452	2.99364	3.08956	3.12466	2.91539	2.95169	-0.238745	0.834108	1.22672	-1.11404	-0.708047	0.0419568	0.137872	0.172973	-0.0362968	1.02951	1.10028	1.12738	-1.02548	0.265956	0.8319	0.791649	-0.200065	0.79117	0.40871	0.431633	0.842095	0.10173	0.388585	0.364885	0.0746387	0.945978	0.772746	0.772746
hsa-miR-6069	529	0.00259436	0.204701	0.207295	0.199342	0.0125153	0.987485	0.0464596	89.5494	93.5494	93.7563	93.7083	0.419155	4	61	0.794197	2.9747	3.08994	3.12503	2.91538	2.95157	-0.401869	0.862556	1.2476	-1.05272	-0.655571	0.0231227	0.138364	0.173458	-0.0361966	1.01616	1.10066	1.12776	-1.02541	0.143218	0.815652	0.775719	-0.194948	0.88659	0.417873	0.440912	0.846082	0.0522772	0.378956	0.355648	0.0725877	0.945978	0.772746	0.772746
hsa-miR-6081	530	0.0370045	0.182107	0.219111	0.289544	0.168885	0.831115	0.451499	88.4678	92.4678	92.6746	92.6266	8.9408	4	61	9.49151e-06	3.90081	3.10699	3.19073	3.53598	3.26883	1.55059	-0.910479	-0.650881	0.419501	-0.408735	0.631984	-0.161838	-0.0781045	0.267149	1.54969	-1.11871	-1.05563	1.20343	4.11348	-0.988578	-0.367305	1.51073	0.000118621	0.326775	0.714663	0.136019	3.92584	0.485751	0.145899	0.866399	0.00142346	0.772746	0.945978
hsa-miR-610	531	0.0391003	0.104786	0.143886	0.137292	0.271745	0.728255	0.345077	57.663	61.663	61.8699	61.8218	0.784651	4	61	0.539575	3.41464	3.52447	3.2864	3.46129	3.52366	-0.278762	0.836403	-1.58077	0.194949	0.828181	-0.109026	0.000809761	-0.237265	-0.062369	-1.0785	1.00056	-1.17876	-1.04418	-0.933564	0.00648507	-1.46785	-0.463871	0.35421	0.994847	0.147283	0.644391	0.45074	0.00224377	0.831849	0.19085	0.772746	0.997251	0.53767
hsa-miR-6126	532	0.235172	0.375522	0.610694	0.621368	0.38509	0.61491	0.48695	138.39	142.39	142.597	142.549	4.35123	4	61	0.00367743	7.81361	7.11293	7.38611	7.90081	7.27155	0.919802	-1.11579	-0.322171	1.17312	-0.654966	0.54206	-0.158621	0.114553	0.629256	1.45605	-1.11622	1.08264	1.54677	2.44858	-0.668671	0.373839	2.46847	0.017232	0.506228	0.70982	0.016387	1.76366	0.295654	0.148852	1.7855	0.103138	0.824662	0.945978
hsa-miR-6129	533	0.00259436	0.204701	0.207295	0.199342	0.0125153	0.987485	0.0464596	89.5494	93.5494	93.7563	93.7083	0.419155	4	61	0.794197	2.9747	3.08994	3.12503	2.91538	2.95157	-0.401869	0.862556	1.2476	-1.05272	-0.655571	0.0231227	0.138364	0.173458	-0.0361966	1.01616	1.10066	1.12776	-1.02541	0.143218	0.815652	0.775719	-0.194948	0.88659	0.417873	0.440912	0.846082	0.0522772	0.378956	0.355648	0.0725877	0.945978	0.772746	0.772746
hsa-miR-6130	534	0.0143832	0.232437	0.24682	0.238572	0.0582741	0.941726	0.120245	99.4309	103.431	103.638	103.59	0.746928	4	61	0.563853	3.05975	3.23568	3.29285	3.02887	3.00806	-0.502236	0.851066	1.29086	-0.739798	-0.899897	0.0516945	0.227619	0.284792	0.0208123	1.03648	1.1709	1.21823	1.01453	0.299241	1.24602	1.19086	0.104725	0.765773	0.217521	0.238323	0.916938	0.1159	0.662499	0.622835	0.0376602	0.945978	0.704381	0.739166
hsa-miR-6134	535	0.00259436	0.204701	0.207295	0.199342	0.0125153	0.987485	0.0464596	89.5494	93.5494	93.7563	93.7083	0.419155	4	61	0.794197	2.9747	3.08994	3.12503	2.91538	2.95157	-0.401869	0.862556	1.2476	-1.05272	-0.655571	0.0231227	0.138364	0.173458	-0.0361966	1.01616	1.10066	1.12776	-1.02541	0.143218	0.815652	0.775719	-0.194948	0.88659	0.417873	0.440912	0.846082	0.0522772	0.378956	0.355648	0.0725877	0.945978	0.772746	0.772746
hsa-miR-616-5p	536	0.00259436	0.204701	0.207295	0.199342	0.0125153	0.987485	0.0464596	89.5494	93.5494	93.7563	93.7083	0.419155	4	61	0.794197	2.9747	3.08994	3.12503	2.91538	2.95157	-0.401869	0.862556	1.2476	-1.05272	-0.655571	0.0231227	0.138364	0.173458	-0.0361966	1.01616	1.10066	1.12776	-1.02541	0.143218	0.815652	0.775719	-0.194948	0.88659	0.417873	0.440912	0.846082	0.0522772	0.378956	0.355648	0.0725877	0.945978	0.772746	0.772746
hsa-miR-619-5p	537	0	0.18463	0.18463	0.176829	0	1	0.0201372	82.5799	84.5799	84.6477	84.6594	0.313403	4	61	0.867949	2.97511	3.0852	3.12112	2.99023	2.95514	-0.686371	0.81733	1.30796	-0.479792	-0.959123	0.0199691	0.13006	0.165981	0.0350935	1.01394	1.09434	1.12193	1.02462	0.130448	0.810636	0.782666	0.19936	0.896641	0.420726	0.436851	0.842644	0.0473814	0.376	0.359667	0.0743557	0.950944	0.772746	0.772746
hsa-miR-624-5p	538	0.147982	0.199783	0.347765	0.32979	0.425524	0.574476	0.487175	100.884	104.884	105.091	105.043	2.67746	4	61	0.0400041	4.65302	4.65664	5.11058	4.76898	4.40305	-0.254761	-0.240659	1.52665	0.196713	-1.22794	0.249965	0.253588	0.707528	0.365929	1.18918	1.19217	1.633	1.28871	1.54752	1.46426	3.16447	1.96728	0.12691	0.148257	0.00242364	0.0537034	0.896505	0.828986	2.61553	1.27	0.490219	0.540412	0.0198476
hsa-miR-627-3p	539	0.0104965	0.100073	0.11057	0.116985	0.094931	0.905069	0.239024	49.4678	53.4678	53.6747	53.6267	2.20215	4	61	0.0792407	6.70998	6.83083	6.82623	7.06255	6.86281	-1.1603	-0.216041	-0.251997	1.59448	0.0338571	-0.152835	-0.0319832	-0.0365851	0.199737	-1.11175	-1.02242	-1.02568	1.14849	-1.3455	-0.265387	-0.232692	1.52821	0.183443	0.791606	0.816779	0.131628	0.736498	0.101491	0.0878953	0.88065	0.627175	0.945978	0.945978
hsa-miR-627-5p	540	0.0388068	0.147459	0.186266	0.187252	0.208341	0.791659	0.318218	76.7636	80.7636	80.9705	80.9225	1.56016	4	61	0.196368	5.85741	6.03742	5.63163	5.93802	6.02864	-0.247771	0.834317	-1.60489	0.236833	0.781512	-0.171232	0.00878472	-0.397003	-0.0906129	-1.12602	1.00611	-1.31677	-1.06482	-1.23738	0.0594843	-2.07281	-0.56884	0.220687	0.952761	0.0424224	0.571554	0.656224	0.0210161	1.37241	0.242943	0.706664	0.975356	0.214233
hsa-miR-628-3p	541	0.0239303	0.118413	0.142343	0.156575	0.168117	0.831883	0.340352	62.1889	66.1889	66.3958	66.3478	3.00204	4	61	0.0250659	4.55436	4.49381	4.01756	4.52339	4.52517	0.577839	0.311769	-1.78091	0.441741	0.449565	0.0291924	-0.0313595	-0.507609	-0.00178061	1.02044	-1.02197	-1.42169	-1.00123	0.235638	-0.237567	-2.96041	-0.0124876	0.814503	0.813013	0.00437109	0.990077	0.0891072	0.0899024	2.35941	0.00433086	0.945978	0.945978	0.0327023
hsa-miR-628-5p	542	0.276966	0.169264	0.44623	0.438247	0.620679	0.379321	0.67613	95.7346	99.7346	99.9415	99.8935	5.55643	4	61	0.000701284	4.25673	3.9635	3.8988	4.02707	3.56092	1.25173	0.087698	-0.169122	0.340065	-1.51037	0.695809	0.402574	0.337878	0.466149	1.61979	1.32186	1.2639	1.38142	4.67464	2.51771	1.63976	2.71907	1.67361e-05	0.0144538	0.106202	0.00851387	4.77635	1.84002	0.973867	2.06987	0.000287718	0.090532	0.432662
hsa-miR-6501-5p	543	0.00876525	0.184373	0.193138	0.186238	0.0453834	0.954617	0.100179	84.7435	88.7435	88.9504	88.9024	0.533226	4	61	0.71178	3.02786	3.14376	3.15718	2.92356	3.03552	-0.310288	0.899994	1.04016	-1.39956	-0.230307	-0.00765865	0.108232	0.121654	-0.111962	-1.00532	1.07791	1.08798	-1.0807	-0.0498245	0.666854	0.571656	-0.633213	0.960425	0.50738	0.569655	0.528961	0.0175365	0.294667	0.244388	0.276576	0.980132	0.825983	0.878959
hsa-miR-6503-3p	544	0.00683435	0.199953	0.206788	0.202109	0.0330501	0.96695	0.0943328	89.1304	93.1304	93.3372	93.2892	0.775703	4	61	0.545273	2.97212	3.09843	3.24345	2.91764	2.94646	-0.469949	0.464818	1.53801	-0.873076	-0.659807	0.0256552	0.151969	0.296988	-0.0288188	1.01794	1.11108	1.22858	-1.02018	0.160436	0.901512	1.34134	-0.156685	0.873068	0.370862	0.184784	0.87601	0.0589521	0.430787	0.733335	0.0574908	0.945978	0.772746	0.63087
hsa-miR-6505-5p	545	0.00259436	0.204701	0.207295	0.199342	0.0125153	0.987485	0.0464596	89.5494	93.5494	93.7563	93.7083	0.419155	4	61	0.794197	2.9747	3.08994	3.12503	2.91538	2.95157	-0.401869	0.862556	1.2476	-1.05272	-0.655571	0.0231227	0.138364	0.173458	-0.0361966	1.01616	1.10066	1.12776	-1.02541	0.143218	0.815652	0.775719	-0.194948	0.88659	0.417873	0.440912	0.846082	0.0522772	0.378956	0.355648	0.0725877	0.945978	0.772746	0.772746
hsa-miR-652-3p	546	0.0238116	0.0939262	0.117738	0.198889	0.202243	0.797757	0.590721	49.0745	53.0745	53.2814	53.2334	15.1483	4	61	1.18112e-08	7.50532	7.61145	6.66461	7.13392	7.65892	0.455928	0.709941	-1.55638	-0.433053	0.823565	-0.153593	-0.0474703	-0.994303	-0.524995	-1.11234	-1.03345	-1.99212	-1.43893	-1.39088	-0.402893	-6.50555	-4.13011	0.169315	0.688435	1.62749e-08	0.000112115	0.771306	0.162137	7.78848	3.95034	0.592235	0.945978	7.06399e-07
hsa-miR-652-5p	547	0.00259436	0.204701	0.207295	0.199342	0.0125153	0.987485	0.0464596	89.5494	93.5494	93.7563	93.7083	0.419155	4	61	0.794197	2.9747	3.08994	3.12503	2.91538	2.95157	-0.401869	0.862556	1.2476	-1.05272	-0.655571	0.0231227	0.138364	0.173458	-0.0361966	1.01616	1.10066	1.12776	-1.02541	0.143218	0.815652	0.775719	-0.194948	0.88659	0.417873	0.440912	0.846082	0.0522772	0.378956	0.355648	0.0725877	0.945978	0.772746	0.772746
hsa-miR-654-3p	548	0.211971	0.176019	0.387989	0.696303	0.546331	0.453669	0.787388	96.1544	100.154	100.361	100.313	27.6924	4	61	3.9994e-13	5.58787	5.80719	4.15775	4.62836	5.65679	0.575187	0.875345	-1.38206	-0.737981	0.669505	-0.0689163	0.150404	-1.49904	-1.02842	-1.04893	1.10988	-2.82654	-2.0398	-0.454191	0.923292	-7.13683	-5.88505	0.651303	0.359493	1.34817e-09	1.82201e-07	0.186217	0.44431	8.87026	6.73945	0.943734	0.772746	8.37937e-08
hsa-miR-656-3p	549	0.00259436	0.204701	0.207295	0.199342	0.0125153	0.987485	0.0464596	89.5494	93.5494	93.7563	93.7083	0.419155	4	61	0.794197	2.9747	3.08994	3.12503	2.91538	2.95157	-0.401869	0.862556	1.2476	-1.05272	-0.655571	0.0231227	0.138364	0.173458	-0.0361966	1.01616	1.10066	1.12776	-1.02541	0.143218	0.815652	0.775719	-0.194948	0.88659	0.417873	0.440912	0.846082	0.0522772	0.378956	0.355648	0.0725877	0.945978	0.772746	0.772746
hsa-miR-660-5p	550	0.0621124	0.152967	0.215079	0.305124	0.288789	0.711211	0.570659	81.1855	85.1855	85.3924	85.3444	12.6188	4	61	1.52823e-07	6.2925	6.42493	7.2861	7.02446	6.33846	-0.842236	-0.549327	1.35541	0.77672	-0.740569	-0.0459657	0.0864646	0.947639	0.686	-1.03237	1.06177	1.92871	1.60882	-0.325681	0.57275	4.85102	4.22166	0.74578	0.568919	8.85433e-06	8.20339e-05	0.127389	0.244949	5.05284	4.08601	0.945978	0.878959	0.000167679
hsa-miR-664a-3p	551	0.00721351	0.142327	0.14954	0.146042	0.0482379	0.951762	0.115551	69.0803	73.0803	73.2872	73.2392	0.696574	4	61	0.597252	3.14384	3.11539	3.12965	2.91921	3.08571	0.70931	0.399274	0.554647	-1.73899	0.0757582	0.0581276	0.0296822	0.0439374	-0.166501	1.04111	1.02079	1.03092	-1.12233	0.430311	0.208031	0.234943	-1.07151	0.668486	0.835897	0.81504	0.28816	0.174908	0.077847	0.0888212	0.540366	0.945978	0.945978	0.945978
hsa-miR-664a-5p	552	0.0100281	0.116383	0.126411	0.134779	0.0793293	0.920671	0.227384	58.0862	62.0862	62.2931	62.2451	2.28662	4	61	0.0702011	3.71955	3.69731	3.46962	3.37948	3.58818	1.01858	0.866268	-0.693179	-1.31052	0.118851	0.131367	0.109129	-0.118563	-0.208699	1.09533	1.07858	-1.08565	-1.15565	1.07327	0.841421	-0.699791	-1.48198	0.287376	0.403399	0.486718	0.143493	0.541549	0.394265	0.312723	0.84317	0.772746	0.772746	0.809194
hsa-miR-670-3p	553	0.000946558	0.210136	0.211082	0.205374	0.0044843	0.995516	0.0436048	90.7207	94.7207	94.9276	94.8796	0.577702	4	61	0.679881	2.97492	3.08699	3.20349	2.91408	2.95373	-0.438816	0.511999	1.50028	-0.954931	-0.618529	0.0211841	0.133263	0.249759	-0.0396541	1.01479	1.09677	1.18901	-1.02787	0.129634	0.777346	1.10335	-0.211016	0.897283	0.439959	0.274207	0.833578	0.0470708	0.356588	0.561921	0.0790538	0.950944	0.772746	0.772746
hsa-miR-671-3p	554	0.115855	0.124689	0.240544	0.264951	0.481639	0.518361	0.602928	73.5034	77.5034	77.7103	77.6623	6.93797	4	61	0.000113727	4.51136	4.22709	3.8728	3.90997	4.33342	1.23806	0.204259	-1.08424	-0.949042	0.590963	0.177931	-0.106332	-0.460628	-0.423454	1.13126	-1.07649	-1.37614	-1.34113	1.3938	-0.77634	-2.60667	-2.88031	0.168437	0.440548	0.0114756	0.00547436	0.773564	0.356006	1.94022	2.26167	0.590015	0.772746	0.074763
hsa-miR-671-5p	555	0.140092	0.133734	0.273825	0.333959	0.511609	0.488391	0.662649	78.5187	82.5187	82.7256	82.6776	11.0906	4	61	7.97697e-07	5.47609	5.47862	6.33123	6.08003	5.53208	-0.759678	-0.75334	1.38063	0.751923	-0.61954	-0.0559907	-0.0534586	0.799148	0.547953	-1.03957	-1.03775	1.74007	1.46201	-0.423424	-0.376689	4.36586	3.59813	0.673475	0.707712	4.98375e-05	0.000643302	0.171679	0.150143	4.30244	3.19158	0.945978	0.945978	0.000710624
hsa-miR-6734-3p	556	0.00259436	0.204701	0.207295	0.199342	0.0125153	0.987485	0.0464596	89.5494	93.5494	93.7563	93.7083	0.419155	4	61	0.794197	2.9747	3.08994	3.12503	2.91538	2.95157	-0.401869	0.862556	1.2476	-1.05272	-0.655571	0.0231227	0.138364	0.173458	-0.0361966	1.01616	1.10066	1.12776	-1.02541	0.143218	0.815652	0.775719	-0.194948	0.88659	0.417873	0.440912	0.846082	0.0522772	0.378956	0.355648	0.0725877	0.945978	0.772746	0.772746
hsa-miR-6734-5p	557	0	0.141868	0.141868	0.141341	0	1	0.0580433	66.509	68.509	68.5768	68.5884	0.939703	4	61	0.447171	3.14252	3.12413	3.12112	2.91314	2.98426	0.835053	0.655457	0.626027	-1.40561	-0.710933	0.158262	0.139877	0.136864	-0.0711134	1.11594	1.10181	1.09951	-1.05053	1.17941	0.994574	0.736239	-0.460863	0.242814	0.323872	0.464407	0.646535	0.614726	0.489626	0.333101	0.189408	0.746931	0.772746	0.784476
hsa-miR-6763-3p	558	0	0.186622	0.186622	0.179909	0	1	0.0265221	83.2345	85.2345	85.3023	85.314	0.415482	4	61	0.796831	3.16266	3.10164	3.12112	2.99023	3.0073	1.15332	0.335652	0.59669	-1.15717	-0.928492	0.155362	0.0943404	0.113821	-0.0170659	1.1137	1.06758	1.08209	-1.0119	1.00947	0.584856	0.533841	-0.0964297	0.316739	0.560802	0.595391	0.923495	0.499299	0.251191	0.225197	0.0345652	0.772746	0.873966	0.89866
hsa-miR-676-3p	559	0.0011267	0.520308	0.521435	0.745749	0.00216076	0.997839	0.346513	145.9	149.9	150.107	150.059	8.02203	4	61	2.90065e-05	3.12789	3.08562	4.06634	4.27938	2.95533	-0.605396	-0.673623	0.909525	1.25344	-0.88395	0.172556	0.130291	1.111	1.32405	1.12705	1.09451	2.15996	2.50368	0.671269	0.483375	3.11993	4.47917	0.504584	0.63056	0.00276199	3.35151e-05	0.297067	0.200273	2.55878	4.47476	0.823643	0.929402	0.0221691
hsa-miR-6783-5p	560	0.00259436	0.204701	0.207295	0.199342	0.0125153	0.987485	0.0464596	89.5494	93.5494	93.7563	93.7083	0.419155	4	61	0.794197	2.9747	3.08994	3.12503	2.91538	2.95157	-0.401869	0.862556	1.2476	-1.05272	-0.655571	0.0231227	0.138364	0.173458	-0.0361966	1.01616	1.10066	1.12776	-1.02541	0.143218	0.815652	0.775719	-0.194948	0.88659	0.417873	0.440912	0.846082	0.0522772	0.378956	0.355648	0.0725877	0.945978	0.772746	0.772746
hsa-miR-6790-3p	561	0.00259436	0.204701	0.207295	0.199342	0.0125153	0.987485	0.0464596	89.5494	93.5494	93.7563	93.7083	0.419155	4	61	0.794197	2.9747	3.08994	3.12503	2.91538	2.95157	-0.401869	0.862556	1.2476	-1.05272	-0.655571	0.0231227	0.138364	0.173458	-0.0361966	1.01616	1.10066	1.12776	-1.02541	0.143218	0.815652	0.775719	-0.194948	0.88659	0.417873	0.440912	0.846082	0.0522772	0.378956	0.355648	0.0725877	0.945978	0.772746	0.772746
hsa-miR-6793-5p	562	0.00259436	0.204701	0.207295	0.199342	0.0125153	0.987485	0.0464596	89.5494	93.5494	93.7563	93.7083	0.419155	4	61	0.794197	2.9747	3.08994	3.12503	2.91538	2.95157	-0.401869	0.862556	1.2476	-1.05272	-0.655571	0.0231227	0.138364	0.173458	-0.0361966	1.01616	1.10066	1.12776	-1.02541	0.143218	0.815652	0.775719	-0.194948	0.88659	0.417873	0.440912	0.846082	0.0522772	0.378956	0.355648	0.0725877	0.945978	0.772746	0.772746
hsa-miR-6827-5p	563	0.00259436	0.204701	0.207295	0.199342	0.0125153	0.987485	0.0464596	89.5494	93.5494	93.7563	93.7083	0.419155	4	61	0.794197	2.9747	3.08994	3.12503	2.91538	2.95157	-0.401869	0.862556	1.2476	-1.05272	-0.655571	0.0231227	0.138364	0.173458	-0.0361966	1.01616	1.10066	1.12776	-1.02541	0.143218	0.815652	0.775719	-0.194948	0.88659	0.417873	0.440912	0.846082	0.0522772	0.378956	0.355648	0.0725877	0.945978	0.772746	0.772746
hsa-miR-6832-3p	564	0.00030746	0.197515	0.197822	0.190464	0.00155422	0.998446	0.0281669	86.7815	90.7815	90.9884	90.9404	0.40069	4	61	0.807401	2.98822	3.08577	3.12162	2.91342	2.95471	-0.278491	0.829193	1.23626	-1.12794	-0.65902	0.0335119	0.131062	0.16691	-0.0412961	1.0235	1.0951	1.12265	-1.02904	0.211609	0.789348	0.760807	-0.226762	0.833118	0.432966	0.449704	0.821367	0.0792936	0.363546	0.347074	0.0854628	0.945978	0.772746	0.773256
hsa-miR-6833-3p	565	0.00259436	0.204701	0.207295	0.199342	0.0125153	0.987485	0.0464596	89.5494	93.5494	93.7563	93.7083	0.419155	4	61	0.794197	2.9747	3.08994	3.12503	2.91538	2.95157	-0.401869	0.862556	1.2476	-1.05272	-0.655571	0.0231227	0.138364	0.173458	-0.0361966	1.01616	1.10066	1.12776	-1.02541	0.143218	0.815652	0.775719	-0.194948	0.88659	0.417873	0.440912	0.846082	0.0522772	0.378956	0.355648	0.0725877	0.945978	0.772746	0.772746
hsa-miR-6847-5p	566	0	0.104211	0.104211	0.100337	0	1	0.025301	47.6921	49.6921	49.7599	49.7715	0.395856	4	61	0.810842	3.12261	3.10886	3.12112	3.02238	3.0073	0.81339	0.570976	0.787075	-0.95283	-1.21861	0.115315	0.101558	0.113821	0.0150829	1.08321	1.07293	1.08209	1.01051	1.00267	0.842535	0.714391	0.114049	0.319983	0.40278	0.47771	0.909574	0.494873	0.394932	0.320835	0.041162	0.772746	0.772746	0.800503
hsa-miR-6861-5p	567	0.00259436	0.204701	0.207295	0.199342	0.0125153	0.987485	0.0464596	89.5494	93.5494	93.7563	93.7083	0.419155	4	61	0.794197	2.9747	3.08994	3.12503	2.91538	2.95157	-0.401869	0.862556	1.2476	-1.05272	-0.655571	0.0231227	0.138364	0.173458	-0.0361966	1.01616	1.10066	1.12776	-1.02541	0.143218	0.815652	0.775719	-0.194948	0.88659	0.417873	0.440912	0.846082	0.0522772	0.378956	0.355648	0.0725877	0.945978	0.772746	0.772746
hsa-miR-6865-5p	568	0.118069	0.428915	0.546984	0.724018	0.215855	0.784145	0.487734	142.108	146.108	146.315	146.267	9.33482	4	61	5.94419e-06	4.84898	4.17546	3.42914	3.72173	4.71712	1.09134	-0.0049294	-1.21968	-0.743442	0.876713	0.131861	-0.54166	-1.28797	-0.995385	1.09571	-1.45565	-2.44185	-1.99361	0.558624	-2.14968	-3.94235	-3.66323	0.578463	0.0355555	0.000210595	0.000522963	0.237724	1.44909	3.67655	3.28153	0.886913	0.185589	0.00236334
hsa-miR-6866-5p	569	0.00244354	0.201253	0.203697	0.195878	0.011996	0.988004	0.045554	88.4862	92.4862	92.6931	92.645	0.416921	4	61	0.795799	2.98159	3.08972	3.12483	2.91535	2.95168	-0.343482	0.852932	1.24138	-1.07639	-0.674439	0.0299122	0.138046	0.173154	-0.0363293	1.02095	1.10041	1.12752	-1.0255	0.186863	0.820844	0.781008	-0.197344	0.852388	0.414931	0.437818	0.844214	0.0693627	0.382024	0.358706	0.0735474	0.945978	0.772746	0.772746
hsa-miR-6872-3p	570	0	0.185606	0.185606	0.178798	0	1	0.0258005	82.9017	84.9017	84.9695	84.9811	0.403879	4	61	0.805128	3.05191	3.0852	3.12112	2.92564	2.95514	0.28662	0.682375	1.10942	-1.21455	-0.863869	0.0967718	0.13006	0.165981	-0.0294968	1.06938	1.09434	1.12193	-1.02066	0.630496	0.808501	0.780605	-0.167125	0.530725	0.421944	0.438054	0.867824	0.27513	0.374745	0.358473	0.0615681	0.847483	0.772746	0.772746
hsa-miR-7-1-3p	571	0	0.134118	0.134118	0.14148	0	1	0.110371	63.0823	65.0823	65.1501	65.1617	1.89197	4	61	0.123308	3.25731	3.15701	3.38464	3.24033	2.96572	0.363981	-0.284341	1.18702	0.254202	-1.52086	0.291594	0.191295	0.418922	0.27461	1.22399	1.14179	1.33693	1.20967	2.23493	1.39892	2.31771	1.83036	0.0290946	0.1669	0.0238354	0.072083	1.53619	0.777542	1.62278	1.14217	0.156375	0.589658	0.133743
hsa-miR-718	572	0	0.179754	0.179754	0.174203	0	1	0.0316339	80.9473	82.9473	83.0151	83.0268	0.498177	4	61	0.737111	3.07276	3.0852	3.12112	2.91314	2.95514	0.480724	0.618834	1.01772	-1.29183	-0.825456	0.117623	0.13006	0.165981	-0.0419972	1.08495	1.09434	1.12193	-1.02954	0.778723	0.821556	0.79321	-0.241793	0.439154	0.414529	0.43073	0.809752	0.357384	0.382445	0.365795	0.091648	0.772746	0.772746	0.772746
hsa-miR-744-5p	573	0.13825	0.122084	0.260334	0.323999	0.531049	0.468951	0.682865	73.4475	77.4475	77.6544	77.6063	12.0861	4	61	2.69268e-07	8.39513	8.19461	7.35753	7.82932	8.17197	0.994357	0.502544	-1.55053	-0.393382	0.447009	0.223165	0.0226428	-0.814435	-0.342644	1.16729	1.01582	-1.75861	-1.26808	1.76615	0.166939	-4.65626	-2.35457	0.0823741	0.86797	1.78744e-05	0.0217787	1.08421	0.0614951	4.74777	1.66197	0.355926	0.945978	0.000302989
hsa-miR-7-5p	574	0.0815048	0.0720426	0.153547	0.146121	0.530812	0.469188	0.585041	41.2669	45.2669	45.4738	45.4257	2.63691	4	61	0.0424108	11.7753	12.0259	12.0341	11.9796	12.0168	-1.75582	0.54729	0.622366	0.12213	0.464031	-0.241589	0.00906125	0.0172318	-0.0372095	-1.18229	1.0063	1.01202	-1.02613	-2.48894	0.0869662	0.128247	-0.332857	0.0155567	0.930983	0.898376	0.740383	1.80808	0.0310582	0.0465421	0.130543	0.0954668	0.966468	0.950944
hsa-miR-7641	575	0.00259436	0.204701	0.207295	0.199342	0.0125153	0.987485	0.0464596	89.5494	93.5494	93.7563	93.7083	0.419155	4	61	0.794197	2.9747	3.08994	3.12503	2.91538	2.95157	-0.401869	0.862556	1.2476	-1.05272	-0.655571	0.0231227	0.138364	0.173458	-0.0361966	1.01616	1.10066	1.12776	-1.02541	0.143218	0.815652	0.775719	-0.194948	0.88659	0.417873	0.440912	0.846082	0.0522772	0.378956	0.355648	0.0725877	0.945978	0.772746	0.772746
hsa-miR-769-3p	576	0.00259436	0.204701	0.207295	0.199342	0.0125153	0.987485	0.0464596	89.5494	93.5494	93.7563	93.7083	0.419155	4	61	0.794197	2.9747	3.08994	3.12503	2.91538	2.95157	-0.401869	0.862556	1.2476	-1.05272	-0.655571	0.0231227	0.138364	0.173458	-0.0361966	1.01616	1.10066	1.12776	-1.02541	0.143218	0.815652	0.775719	-0.194948	0.88659	0.417873	0.440912	0.846082	0.0522772	0.378956	0.355648	0.0725877	0.945978	0.772746	0.772746
hsa-miR-769-5p	577	0.0474538	0.124322	0.171776	0.167209	0.276254	0.723746	0.362337	68.2101	72.2101	72.417	72.369	1.42883	4	61	0.235252	3.81012	4.07443	3.77164	3.85573	3.88082	-0.583488	1.67038	-0.911667	-0.194577	0.0193526	-0.0706945	0.193614	-0.10918	-0.0250873	-1.05022	1.14363	-1.07861	-1.01754	-0.555708	1.42329	-0.620064	-0.171288	0.580443	0.159745	0.537525	0.864564	0.236241	0.796572	0.269601	0.0632027	0.888254	0.571969	0.8544
hsa-miR-7705	578	0.00259436	0.204701	0.207295	0.199342	0.0125153	0.987485	0.0464596	89.5494	93.5494	93.7563	93.7083	0.419155	4	61	0.794197	2.9747	3.08994	3.12503	2.91538	2.95157	-0.401869	0.862556	1.2476	-1.05272	-0.655571	0.0231227	0.138364	0.173458	-0.0361966	1.01616	1.10066	1.12776	-1.02541	0.143218	0.815652	0.775719	-0.194948	0.88659	0.417873	0.440912	0.846082	0.0522772	0.378956	0.355648	0.0725877	0.945978	0.772746	0.772746
hsa-miR-7976	579	0.0157917	0.0722355	0.0880272	0.0833588	0.179395	0.820605	0.245864	32.3832	36.3832	36.5901	36.5421	0.573906	4	61	0.682588	3.4865	3.43777	3.35962	3.37013	3.37543	1.4803	0.5854	-0.849607	-0.656695	-0.559402	0.111077	0.0623431	-0.0158038	-0.00529833	1.08003	1.04416	-1.01101	-1.00368	1.14762	0.604214	-0.117973	-0.0475583	0.255608	0.547942	0.906477	0.962224	0.592425	0.261265	0.0426432	0.016724	0.772562	0.86171	0.955387
hsa-miR-7977	580	0.110746	0.383249	0.493995	0.721806	0.224184	0.775816	0.541463	135.475	139.475	139.682	139.634	13.1131	4	61	9.11507e-08	5.328	3.91355	4.08896	4.76491	4.27593	1.48867	-0.977748	-0.671879	0.506802	-0.345843	1.05206	-0.362387	-0.186977	0.488979	2.07349	-1.28555	-1.13838	1.40345	4.7143	-1.52081	-0.605351	1.90339	1.45153e-05	0.133475	0.547192	0.0617108	4.83817	0.874601	0.26186	1.20964	0.00025313	0.50396	0.86171
hsa-miR-802	581	0	0.238741	0.238741	0.239233	0	1	0.0634689	98.2584	100.258	100.326	100.338	1.0335	4	61	0.397332	3.03066	3.0852	3.37713	2.91314	2.95514	-0.227355	0.070761	1.66646	-0.869714	-0.640155	0.0755207	0.13006	0.421989	-0.0419972	1.05374	1.09434	1.33977	-1.02954	0.433843	0.712875	1.74988	-0.209807	0.665933	0.478641	0.0851676	0.834518	0.176569	0.31999	1.06973	0.0785644	0.945978	0.800708	0.366689
hsa-miR-8485	582	0.00495856	0.185095	0.190054	0.183064	0.0260903	0.97391	0.0702724	84.0889	88.0889	88.2958	88.2478	0.486204	4	61	0.745781	3.02072	3.11037	3.12765	2.91849	2.95817	-0.0694034	0.908328	1.0968	-1.18424	-0.751486	0.0625437	0.152197	0.169479	-0.0396814	1.04431	1.11126	1.12465	-1.02789	0.406784	0.939987	0.796037	-0.224396	0.68559	0.350932	0.429097	0.823199	0.163935	0.454777	0.367444	0.0844951	0.945978	0.772746	0.772746
hsa-miR-873-3p	583	0	0.169179	0.169179	0.161451	0	1	0.016617	77.2488	79.2488	79.3166	79.3283	0.257692	4	61	0.903864	3.01831	3.0852	3.12112	3.02295	2.95514	-0.345353	0.693525	1.25138	-0.273213	-1.32634	0.0631661	0.13006	0.165981	0.0678113	1.04476	1.09434	1.12193	1.04813	0.431062	0.846844	0.817625	0.40243	0.667943	0.400392	0.416754	0.688774	0.175261	0.397514	0.380121	0.161923	0.945978	0.772746	0.772746
hsa-miR-873-5p	584	0.565092	0.152908	0.718	0.711704	0.787036	0.212964	0.82074	94.951	98.951	99.1579	99.1099	0.433914	4	61	0.783588	3.33248	3.42833	3.27278	3.32655	3.23666	0.180608	1.50009	-0.641247	0.0990166	-1.13847	0.0958203	0.19167	0.0361191	0.0898933	1.06867	1.14209	1.02535	1.06429	0.676903	1.25919	0.184308	0.551307	0.501026	0.212758	0.854383	0.583437	0.300139	0.672113	0.0683474	0.234006	0.8206	0.69427	0.945978
hsa-miR-874-3p	585	0.00259436	0.204701	0.207295	0.199342	0.0125153	0.987485	0.0464596	89.5494	93.5494	93.7563	93.7083	0.419155	4	61	0.794197	2.9747	3.08994	3.12503	2.91538	2.95157	-0.401869	0.862556	1.2476	-1.05272	-0.655571	0.0231227	0.138364	0.173458	-0.0361966	1.01616	1.10066	1.12776	-1.02541	0.143218	0.815652	0.775719	-0.194948	0.88659	0.417873	0.440912	0.846082	0.0522772	0.378956	0.355648	0.0725877	0.945978	0.772746	0.772746
hsa-miR-877-3p	586	0.00259436	0.204701	0.207295	0.199342	0.0125153	0.987485	0.0464596	89.5494	93.5494	93.7563	93.7083	0.419155	4	61	0.794197	2.9747	3.08994	3.12503	2.91538	2.95157	-0.401869	0.862556	1.2476	-1.05272	-0.655571	0.0231227	0.138364	0.173458	-0.0361966	1.01616	1.10066	1.12776	-1.02541	0.143218	0.815652	0.775719	-0.194948	0.88659	0.417873	0.440912	0.846082	0.0522772	0.378956	0.355648	0.0725877	0.945978	0.772746	0.772746
hsa-miR-877-5p	587	0.0110776	0.182577	0.193654	0.188715	0.0572028	0.942797	0.125947	84.6575	88.6575	88.8644	88.8164	0.754122	4	61	0.559172	3.09965	3.14291	3.13072	2.92582	2.93911	0.488673	0.895222	0.780635	-1.14468	-1.01985	0.16054	0.203806	0.191612	-0.0132846	1.11771	1.15173	1.14204	-1.00925	1.04863	1.25906	0.904094	-0.0754296	0.298485	0.212806	0.369502	0.94012	0.525078	0.672015	0.432383	0.0268168	0.772746	0.69427	0.772746
hsa-miR-889-3p	588	0.0233073	0.166505	0.189812	0.186348	0.122791	0.877209	0.212045	81.5136	85.5136	85.7205	85.6725	1.2099	4	61	0.315866	3.10433	3.24186	3.1662	2.93398	2.98263	0.14554	1.2256	0.631405	-1.19228	-0.810261	0.121707	0.259236	0.183574	-0.0486446	1.08802	1.19684	1.13569	-1.03429	0.829676	1.66248	0.904153	-0.288162	0.409957	0.101547	0.369471	0.7742	0.387262	0.993331	0.43242	0.111147	0.772746	0.418624	0.772746
hsa-miR-92a-3p	589	0.037467	0.0825735	0.12004	0.202026	0.31212	0.68788	0.65082	44.1771	48.1771	48.384	48.3359	19.4274	4	61	2.37515e-10	14.6128	14.1669	13.6091	13.9579	14.4632	1.12583	0.012279	-1.3808	-0.509652	0.75234	0.149539	-0.296309	-0.854074	-0.505282	1.10921	-1.228	-1.8076	-1.4194	1.44164	-2.66929	-5.94874	-4.23077	0.154518	0.00972662	1.425e-07	7.95089e-05	0.811022	2.01204	6.84618	4.09958	0.558198	0.0652669	4.42846e-06
hsa-miR-92b-3p	590	0.0231032	0.0836587	0.106762	0.161875	0.216399	0.783601	0.553145	42.4179	46.4179	46.6248	46.5768	13.7008	4	61	4.98368e-08	5.93012	5.52501	5.06038	5.34418	5.62051	1.34341	0.0896517	-1.34831	-0.469976	0.385219	0.309607	-0.0955022	-0.560129	-0.276327	1.23937	-1.06844	-1.4744	-1.21111	2.96988	-0.858177	-3.88204	-2.30261	0.00425533	0.394154	0.000257063	0.0247266	2.37107	0.404334	3.58996	1.60684	0.0319347	0.772746	0.00276942
hsa-miR-92b-5p	591	0	0.183279	0.183279	0.176756	0	1	0.0269043	82.132	84.132	84.1998	84.2114	0.421634	4	61	0.792418	3.02511	3.0852	3.12112	2.91314	2.95514	0.0595323	0.75193	1.16582	-1.2306	-0.746687	0.0699691	0.13006	0.165981	-0.0419972	1.04969	1.09434	1.12193	-1.02954	0.458754	0.813618	0.785545	-0.239456	0.648041	0.419029	0.435175	0.811555	0.188397	0.377756	0.361337	0.0906822	0.942323	0.772746	0.772746
hsa-miR-933	592	0.00259436	0.204701	0.207295	0.199342	0.0125153	0.987485	0.0464596	89.5494	93.5494	93.7563	93.7083	0.419155	4	61	0.794197	2.9747	3.08994	3.12503	2.91538	2.95157	-0.401869	0.862556	1.2476	-1.05272	-0.655571	0.0231227	0.138364	0.173458	-0.0361966	1.01616	1.10066	1.12776	-1.02541	0.143218	0.815652	0.775719	-0.194948	0.88659	0.417873	0.440912	0.846082	0.0522772	0.378956	0.355648	0.0725877	0.945978	0.772746	0.772746
hsa-miR-93-3p	593	0.0501059	0.0688915	0.118997	0.13355	0.421067	0.578933	0.563184	35.8284	39.8284	40.0353	39.9873	4.12176	4	61	0.00507606	7.31248	6.95942	7.0826	7.21284	7.08815	1.34036	-1.26863	-0.358372	0.604016	-0.317374	0.224332	-0.128729	-0.00554794	0.124686	1.16824	-1.09333	-1.00385	1.09027	2.36516	-1.26591	-0.0422573	1.14157	0.0212181	0.210358	0.966432	0.258095	1.67329	0.677041	0.0148289	0.588221	0.122168	0.690481	0.983199
hsa-miR-93-5p	594	0.00507654	0.0225968	0.0276733	0.0318577	0.183445	0.816555	0.383201	-38.3849	-34.3849	-34.178	-34.226	5.27261	4	61	0.00103013	14.8827	14.966	14.806	14.9154	15.0911	-0.467009	0.318217	-1.18949	-0.158585	1.49687	-0.208485	-0.125125	-0.285183	-0.175743	-1.15547	-1.0906	-1.21856	-1.12955	-3.85082	-2.16762	-3.80584	-2.82012	0.000284845	0.0340996	0.000329989	0.00646716	3.54539	1.46725	3.4815	2.18929	0.00302836	0.180475	0.00343301
hsa-miR-939-5p	595	0.0013991	0.200675	0.202074	0.194439	0.00692368	0.993076	0.0373002	88.0423	92.0423	92.2492	92.2012	0.409334	4	61	0.801231	2.98179	3.08779	3.12332	2.91437	2.9532	-0.338616	0.845779	1.24283	-1.09196	-0.65803	0.0285859	0.134583	0.170117	-0.0388344	1.02001	1.09778	1.12515	-1.02728	0.178948	0.802687	0.768825	-0.211398	0.858572	0.425272	0.444964	0.833282	0.0662234	0.371333	0.351675	0.0792082	0.945978	0.772746	0.772746
hsa-miR-9-3p	596	0.0049862	0.213006	0.217992	0.218374	0.0228733	0.977127	0.101121	92.4991	96.4991	96.706	96.658	1.12408	4	61	0.353542	3.03993	3.09083	3.3829	2.94067	2.94758	-0.224012	0.0578731	1.67537	-0.773746	-0.735482	0.092356	0.143256	0.435326	-0.00690934	1.06611	1.10439	1.35222	-1.0048	0.560131	0.82545	1.90659	-0.036435	0.577441	0.412333	0.0612863	0.971054	0.238492	0.384752	1.21264	0.0127564	0.886913	0.772746	0.283507
hsa-miR-942-3p	597	0.063955	0.1329	0.196855	0.177092	0.324883	0.675117	0.359668	73.5314	77.5314	77.7383	77.6903	0.17998	4	61	0.947916	3.49499	3.47209	3.61501	3.47824	3.50782	-0.319168	-0.711527	1.73626	-0.606126	-0.0994351	-0.0128297	-0.0357388	0.107182	-0.0295847	-1.00893	-1.02508	1.07712	-1.02072	-0.0974792	-0.25367	0.588356	-0.195224	0.922665	0.800603	0.558466	0.845866	0.0349557	0.0965827	0.253003	0.0726983	0.962781	0.945978	0.872871
hsa-miR-942-5p	598	0.302955	0.0712923	0.374247	0.317837	0.809505	0.190495	0.812951	49.3521	53.3521	53.559	53.511	6.60776	4	61	0.000174271	7.69795	7.76865	8.26863	7.66137	7.91708	-0.666845	-0.380731	1.64255	-0.81488	0.219905	-0.219127	-0.148425	0.351554	-0.255709	-1.16403	-1.10836	1.27593	-1.19392	-2.2669	-1.42779	2.62703	-2.29654	0.0269533	0.158453	0.010878	0.0250936	1.56939	0.800098	1.96345	1.60044	0.14682	0.569868	0.071653
hsa-miR-95-3p	599	0.0049389	0.20434	0.209279	0.201159	0.0235996	0.9764	0.064358	90.0013	94.0013	94.2082	94.1602	0.437493	4	61	0.781009	2.99294	3.09477	3.1711	2.918	3.00065	-0.432472	0.602407	1.37809	-1.19398	-0.354046	-0.0077175	0.0941185	0.170449	-0.0826528	-1.00536	1.06741	1.12541	-1.05896	-0.0477846	0.553592	0.762129	-0.444963	0.962044	0.581882	0.44892	0.657922	0.016805	0.235165	0.347831	0.181826	0.980425	0.888772	0.773256
hsa-miR-9-5p	600	0.345888	0.203598	0.549486	0.532416	0.629476	0.370524	0.67944	107.244	111.244	111.451	111.403	1.01957	4	61	0.404441	3.72615	3.63111	3.87176	3.46491	3.74249	0.257405	-0.372015	1.22176	-1.47275	0.365604	-0.0163371	-0.111374	0.129272	-0.277575	-1.01139	-1.08026	1.09374	-1.21216	-0.100072	-0.635031	0.572008	-1.47623	0.920615	0.527783	0.569418	0.145027	0.0359218	0.277545	0.244569	0.838552	0.962512	0.84501	0.878959
hsa-miR-96-5p	601	0.114941	0.139767	0.254708	0.239811	0.451264	0.548736	0.507407	79.721	83.721	83.9279	83.8799	0.316611	4	61	0.865801	3.84098	3.75762	3.90666	3.73083	3.81963	0.428379	-0.768566	1.37153	-1.15319	0.121844	0.0213479	-0.0620107	0.0870319	-0.088797	1.01491	-1.04392	1.06218	-1.06348	0.157981	-0.427866	0.465288	-0.57062	0.874994	0.670255	0.643382	0.570353	0.0579951	0.17376	0.191531	0.243856	0.945978	0.945978	0.938362
hsa-miR-98-3p	602	0.00259436	0.204701	0.207295	0.199342	0.0125153	0.987485	0.0464596	89.5494	93.5494	93.7563	93.7083	0.419155	4	61	0.794197	2.9747	3.08994	3.12503	2.91538	2.95157	-0.401869	0.862556	1.2476	-1.05272	-0.655571	0.0231227	0.138364	0.173458	-0.0361966	1.01616	1.10066	1.12776	-1.02541	0.143218	0.815652	0.775719	-0.194948	0.88659	0.417873	0.440912	0.846082	0.0522772	0.378956	0.355648	0.0725877	0.945978	0.772746	0.772746
hsa-miR-98-5p	603	0.019972	0.0279534	0.0479255	0.0579363	0.416731	0.583269	0.591318	-19.2992	-15.2992	-15.0923	-15.1403	6.4366	4	61	0.000217851	8.8088	8.73071	8.52828	8.54562	8.76686	1.02033	0.420106	-1.13585	-1.00256	0.697971	0.041939	-0.0361504	-0.238581	-0.22124	1.0295	-1.02537	-1.17983	-1.16573	0.694172	-0.558146	-2.85291	-3.18001	0.49021	0.578788	0.00590746	0.002315	0.309618	0.237481	2.2286	2.63545	0.809999	0.886913	0.042241
hsa-miR-99a-5p	604	0.0162745	0.364798	0.381073	0.639521	0.0427071	0.957293	0.480766	126.25	130.25	130.457	130.409	12.6206	4	61	1.52534e-07	3.88519	4.08879	5.58825	4.879	4.06022	-0.855373	-0.572247	1.51295	0.526647	-0.611972	-0.175029	0.0285665	1.52803	0.81878	-1.12899	1.02	2.88391	1.76391	-0.809685	0.125196	5.10559	3.29283	0.421269	0.90078	3.47946e-06	0.00165316	0.375441	0.0453812	5.45849	2.78168	0.772746	0.952242	7.73781e-05
hsa-miR-99b-5p	605	0	0.28878	0.28878	0.319023	0	1	0.150504	109.866	111.866	111.934	111.945	2.70183	4	61	0.0386239	3.25631	3.15701	3.86506	3.27595	3.01676	-0.178401	-0.484324	1.69703	-0.117895	-0.916407	0.239552	0.140251	0.848303	0.259192	1.18063	1.1021	1.80038	1.19681	1.25125	0.698966	3.19844	1.17733	0.21562	0.48723	0.00219214	0.243635	0.666312	0.312266	2.65913	0.61326	0.700619	0.809489	0.0181357
piRNA	606	0.00259436	0.204701	0.207295	0.199342	0.0125153	0.987485	0.0464596	89.5494	93.5494	93.7563	93.7083	0.419155	4	61	0.794197	2.9747	3.08994	3.12503	2.91538	2.95157	-0.401869	0.862556	1.2476	-1.05272	-0.655571	0.0231227	0.138364	0.173458	-0.0361966	1.01616	1.10066	1.12776	-1.02541	0.143218	0.815652	0.775719	-0.194948	0.88659	0.417873	0.440912	0.846082	0.0522772	0.378956	0.355648	0.0725877	0.945978	0.772746	0.772746
[truncated: 7 more columns]
