# Supplementary material for: Transcriptomic Analysis Reveals Host miRNAs Correlated with Immune Gene Dysregulation during Fatal Disease Progression in the Ebola Virus Cynomolgus Macaque Disease Model
Source: Microorganisms. 2021 Mar 23;9(3):665. doi: 10.3390/microorganisms9030665 (PMC8005181; doi:10.3390/microorganisms9030665)
Supplement: Supplementary file 1 [file microorganisms-09-00665-s001.zip › Supplemental Table S10 - Kegg pathway analysis of DEMs.xlsx]

## Sheet: Sheet1
Table S10. Kegg pathway analysis of DEMs for early, mid, and late phases
Early Binned genes					Mid Binned Genes					Late Binned genes
KEGG pathway	p-value	#genes	#miRNAs		KEGG pathway	p-value	#genes	#miRNAs		KEGG pathway	p-value	#genes	#miRNAs
MAPK signaling pathway	0.00102712	63	5		Fatty acid biosynthesis	1.17e-09	8	8		Proteoglycans in cancer	6.42e-13	151	54
ErbB signaling pathway	0.00307737	22	5		Proteoglycans in cancer	1.17e-09	120	27		Mucin type O-Glycan biosynthesis	9.55e-10	22	33
Oxytocin signaling pathway	0.0055638	40	6		ErbB signaling pathway	3.51e-06	58	25		ErbB signaling pathway	2.87e-07	70	51
Glutamatergic synapse	0.00937161	28	5		Ras signaling pathway	4.83e-06	125	28		Pathways in cancer	1.54e-06	268	55
Adrenergic signaling in cardiomyocytes	0.00976946	37	6		Hippo signaling pathway	7.43e-06	85	27		Ras signaling pathway	4.7e-06	160	54
Amphetamine addiction	0.0131963	15	5		Choline metabolism in cancer	1.57e-05	67	24		Fatty acid biosynthesis	7.89e-06	9	16
Dilated cardiomyopathy	0.0241399	25	5		Glioma	1.57e-05	41	26		Hippo signaling pathway	1.26e-05	108	53
Dopaminergic synapse	0.0293081	31	6		Signaling pathways regulating pluripotency of stem cells	1.57e-05	83	28		ECM-receptor interaction	1.37e-05	56	47
Inflammatory mediator regulation of TRP channels	0.0328409	21	6		N-Glycan biosynthesis	6.24e-05	29	20		Glutamatergic synapse	1.37e-05	84	51
					AMPK signaling pathway	0.000122598	74	28		Wnt signaling pathway	1.37e-05	104	54
					Prion diseases	0.000145605	12	12		Rap1 signaling pathway	1.37e-05	152	55
					TGF-beta signaling pathway	0.000145605	44	24		MAPK signaling pathway	3.07e-05	179	54
					MAPK signaling pathway	0.000145605	142	27		Signaling pathways regulating pluripotency of stem cells	3.56e-05	101	54
					Pathways in cancer	0.000145605	205	28		Focal adhesion	6.89e-05	147	54
					FoxO signaling pathway	0.00018276	79	24		Choline metabolism in cancer	0.000101753	78	50
					PI3K-Akt signaling pathway	0.00025008	178	28		Renal cell carcinoma	0.00013433	52	51
					Lysine degradation	0.000640963	28	25		N-Glycan biosynthesis	0.000210855	34	40
					Adrenergic signaling in cardiomyocytes	0.000686685	83	28		FoxO signaling pathway	0.000210855	98	49
					Thyroid hormone signaling pathway	0.000812125	63	26		Glioma	0.000285872	48	51
					Focal adhesion	0.00123013	113	27		Prolactin signaling pathway	0.000387259	53	51
					Glycosaminoglycan biosynthesis - keratan sulfate	0.0017125	10	11		Regulation of actin cytoskeleton	0.000474578	147	53
					Fatty acid metabolism	0.00223358	22	16		Oxytocin signaling pathway	0.000474578	112	54
					Prolactin signaling pathway	0.00223358	42	26		AMPK signaling pathway	0.000549074	89	54
					Non-small cell lung cancer	0.00255747	34	23		Morphine addiction	0.000554464	64	47
					Wnt signaling pathway	0.00259767	78	27		Lysine degradation	0.000692452	34	44
					Axon guidance	0.00260346	70	25		TGF-beta signaling pathway	0.000934031	55	46
					Prostate cancer	0.00274629	52	26		PI3K-Akt signaling pathway	0.000934031	224	55
					Oxytocin signaling pathway	0.00305433	88	28		Endocytosis	0.00147718	138	52
					mTOR signaling pathway	0.00462767	38	21		Thyroid hormone signaling pathway	0.00150474	80	52
					Glycosphingolipid biosynthesis - lacto and neolacto series	0.00484398	14	18		Glycosaminoglycan biosynthesis - keratan sulfate	0.00171348	12	19
					Dilated cardiomyopathy	0.00487805	53	21		Platelet activation	0.00188172	90	54
					Insulin signaling pathway	0.00487805	78	26		Axon guidance	0.00204725	88	49
					Rap1 signaling pathway	0.00487805	110	28		Prion diseases	0.00270195	18	31
					2-Oxocarboxylic acid metabolism	0.00618536	10	15		Adherens junction	0.00270195	55	47
					Hypertrophic cardiomyopathy (HCM)	0.00618536	49	21		Prostate cancer	0.00333803	64	52
					Amphetamine addiction	0.00618536	37	25		Melanoma	0.00426386	53	50
					Renal cell carcinoma	0.00618536	41	26		p53 signaling pathway	0.00435184	50	43
					Melanoma	0.00618536	43	26		GABAergic synapse	0.00484665	59	48
					Neurotrophin signaling pathway	0.00618536	69	28		Endometrial cancer	0.00505993	39	46
					Arrhythmogenic right ventricular cardiomyopathy (ARVC)	0.0072692	47	21		Neurotrophin signaling pathway	0.00518388	85	55
					p53 signaling pathway	0.00830397	41	21		Adrenergic signaling in cardiomyocytes	0.00946636	97	54
					Glutamatergic synapse	0.00960983	60	25		Retrograde endocannabinoid signaling	0.00952822	70	50
					cAMP signaling pathway	0.0126379	104	29		Insulin signaling pathway	0.00952822	96	52
					cGMP-PKG signaling pathway	0.0152082	87	27		mTOR signaling pathway	0.0107123	45	46
					Regulation of actin cytoskeleton	0.0188834	113	27		cAMP signaling pathway	0.0134856	131	56
					Pancreatic cancer	0.0208397	37	23		Pancreatic cancer	0.0143124	46	47
					Mucin type O-Glycan biosynthesis	0.0274728	14	17		T cell receptor signaling pathway	0.0145492	73	50
					D-Glutamine and D-glutamate metabolism	0.0291236	4	4		Estrogen signaling pathway	0.0163359	67	53
					ECM-receptor interaction	0.0291236	44	23		Amphetamine addiction	0.0194636	45	48
					Endometrial cancer	0.032264	32	22		Glycosaminoglycan biosynthesis - heparan sulfate / heparin	0.01951	18	29
					Platelet activation	0.0325575	66	27		Colorectal cancer	0.0211941	44	48
					Dorso-ventral axis formation	0.0360899	18	19		Circadian rhythm	0.023188	25	41
					Protein processing in endoplasmic reticulum	0.0360899	81	26		Central carbon metabolism in cancer	0.0296915	48	45
					Long-term potentiation	0.0399544	38	24		Small cell lung cancer	0.033762	59	50
					T cell receptor signaling pathway	0.042009	56	25		Phosphatidylinositol signaling system	0.0365705	56	45
					Hedgehog signaling pathway	0.0425268	30	19		Circadian entrainment	0.0365705	69	53
					Estrogen signaling pathway	0.0431237	50	27		Basal cell carcinoma	0.0365777	40	40
					Endocytosis	0.0459926	104	26		Chronic myeloid leukemia	0.0373697	49	49
										Non-small cell lung cancer	0.0403933	38	47
										Long-term potentiation	0.0432395	47	50
										Long-term depression	0.0435771	43	42
										Melanogenesis	0.0456821	68	53
										Hedgehog signaling pathway	0.0474553	37	37
